# Supplementary material
Source: HighWire-hosted journal article supplement (http://rc.rcjournal.com/highwire/filestream/27309/field_highwire_adjunct_files/0/rc-11580-File003.pdf)
Supplement: rc-11580-File003.pdf [file rc-11580-File003.pdf]

## **Technical Challenges in Hospital Oxygen Delivery.**

- UNE-EN ISO 7396-1-2016 Compressed medical gas and vacuum piping systems.
- UNE-EN ISO 7396-2-2007 Medical gas piping systems. Final anesthetic gas evacuation systems.
- AFNOR. FD S90-155. Pipelines for compressed medical gases and vacuum - additional elements for design and delivery acceptance.
- Health Technical Memorandum 02-01: Medical Gas Pipeline. Systems - Part A Design, Installation, Validation and Verification. Department of Health Estates and Facilities Directorate.

Noviembre 2016

### TÍTULO

**Sistemas de canalización de gases medicinales**

**Parte 1: Sistemas de canalización para gases medicinales comprimidos y de vacío**

(ISO 7396-1:2016)

*Medical gas pipeline systems. Part 1: Pipeline systems for compressed medical gases and vacuum (ISO 7396-1:2016)*

*Systèmes de distribution de gaz médicaux. Partie 1: Systèmes de distribution de gaz médicaux comprimés et de vide. (ISO 7396-1:2016)*

### CORRESPONDENCIA

Esta norma es la versión oficial, en español, de la Norma Europea EN ISO 7396-1:2016, que a su vez adopta la Norma Internacional ISO 7396-1:2016.

### OBSERVACIONES

Esta norma anulará y sustituirá a las Normas: UNE-EN ISO 7396-1:2007, UNE-EN ISO 7396-1:2007/A1:2010, UNE-EN ISO 7396-1:2007/A2:2010 y UNE-EN ISO 7396-1:2007/A3:2013 antes de 2019-03-17.

### ANTECEDENTES

Esta norma ha sido elaborada por el comité técnico AEN/CTN 110 *Material de anestesia y reanimación respiratoria* cuya Secretaría desempeña FENIN.



Versión en español

**Sistemas de canalización de gases medicinales**  
**Parte 1: Sistemas de canalización para gases medicinales comprimidos y de vacío**  
**(ISO 7396-1:2016)**

**Medical gas pipeline systems. Part 1:  
Pipeline systems for compressed medical  
gases and vacuum.**  
**(ISO 7396-1:2016)**

**Systèmes de distribution de gaz médicaux.  
Partie 1: Systèmes de distribution de gaz  
médicaux comprimés et de vide.**  
**(ISO 7396-1:2016)**

**Rohrleitungssysteme für medizinische  
Gase. Teil 1: Rohrleitungssysteme für  
medizinische Druckgase und Vakuum.**  
**(ISO 7396-1:2016)**

Esta norma europea ha sido aprobada por CEN el 2015-11-07.

Los miembros de CEN están sometidos al Reglamento Interior de CEN/CENELEC que define las condiciones dentro de las cuales debe adoptarse, sin modificación, la norma europea como norma nacional. Las correspondientes listas actualizadas y las referencias bibliográficas relativas a estas normas nacionales pueden obtenerse en el Centro de Gestión de CEN, o a través de sus miembros.

Esta norma europea existe en tres versiones oficiales (alemán, francés e inglés). Una versión en otra lengua realizada bajo la responsabilidad de un miembro de CEN en su idioma nacional, y notificada al Centro de Gestión, tiene el mismo rango que aquéllas.

Los miembros de CEN son los organismos nacionales de normalización de los países siguientes: Alemania, Antigua República Yugoslava de Macedonia, Austria, Bélgica, Bulgaria, Chipre, Croacia, Dinamarca, Eslovaquia, Eslovenia, España, Estonia, Finlandia, Francia, Grecia, Hungría, Irlanda, Islandia, Italia, Letonia, Lituania, Luxemburgo, Malta, Noruega, Países Bajos, Polonia, Portugal, Reino Unido, República Checa, Rumanía, Suecia, Suiza y Turquía.

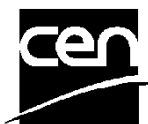

COMITÉ EUROPEO DE NORMALIZACIÓN  
European Committee for Standardization  
Comité Européen de Normalisation  
Europäisches Komitee für Normung  
**CENTRO DE GESTIÓN: Avenue Marnix, 17-1000 Bruxelles**



## Prólogo europeo

El texto de la Norma EN ISO 7396-1:2016 ha sido elaborado por el Comité Técnico ISO/TC 121 *Equipos de anestesia y reanimación respiratoria*, en colaboración con el Comité Técnico CEN/TC 215 *Equipos respiratorios y anestésicos*, cuya Secretaría desempeña BSI.

Esta norma europea debe recibir el rango de norma nacional mediante la publicación de un texto idéntico a ella o mediante ratificación antes de finales de septiembre de 2016, y todas las normas nacionales técnicamente divergentes deben anularse antes de finales de marzo de 2019.

Se llama la atención sobre la posibilidad de que algunos de los elementos de este documento estén sujetos a derechos de patente. CEN y/o CENELEC no es(son) responsable(s) de la identificación de dichos derechos de patente.

Esta norma anula y sustituye a la Norma EN ISO 7396-1:2007.

Esta norma europea ha sido elaborada bajo un Mandato dirigido a CEN por la Comisión Europea y por la Asociación Europea de Libre Comercio, y sirve de apoyo a los requisitos esenciales de las Directivas europeas.

La relación con las Directivas UE se recoge en el anexo informativo ZA, que forma parte integrante de esta norma.

De acuerdo con el Reglamento Interior de CEN/CENELEC, están obligados a adoptar esta norma europea los organismos de normalización de los siguientes países: Alemania, Antigua República Yugoslava de Macedonia, Austria, Bélgica, Bulgaria, Chipre, Croacia, Dinamarca, Eslovaquia, Eslovenia, España, Estonia, Finlandia, Francia, Grecia, Hungría, Irlanda, Islandia, Italia, Letonia, Lituania, Luxemburgo, Malta, Noruega, Países Bajos, Polonia, Portugal, Reino Unido, República Checa, Rumanía, Suecia, Suiza y Turquía.

## Declaración

El texto de la Norma ISO 7396-1:2016 ha sido aprobado por CEN como Norma EN ISO 7396-1:2016 sin ninguna modificación.

## Índice

|                                                                                                                                         |           |
|-----------------------------------------------------------------------------------------------------------------------------------------|-----------|
| Prólogo.....                                                                                                                            | 8         |
| <b>0</b> <b>Introducción.....</b>                                                                                                       | <b>9</b>  |
| <b>1</b> <b>(*) Objeto y campo de aplicación .....</b>                                                                                  | <b>10</b> |
| <b>2</b> <b>Normas para consulta .....</b>                                                                                              | <b>12</b> |
| <b>3</b> <b>Términos y definiciones.....</b>                                                                                            | <b>13</b> |
| <b>4</b> <b>Requisitos generales .....</b>                                                                                              | <b>19</b> |
| 4.1      (*) Seguridad.....                                                                                                             | 19        |
| 4.2      (*) Construcción alternativa .....                                                                                             | 19        |
| 4.3      Materiales.....                                                                                                                | 20        |
| 4.4      Diseño del sistema.....                                                                                                        | 21        |
| 4.4.1    Generalidades .....                                                                                                            | 21        |
| 4.4.2    Ampliaciones y modificaciones de sistemas de canalización existentes.....                                                      | 22        |
| <b>5</b> <b>Sistemas de suministro .....</b>                                                                                            | <b>22</b> |
| 5.1      Componentes del sistema .....                                                                                                  | 22        |
| 5.2      Requisitos generales .....                                                                                                     | 23        |
| 5.2.1    Capacidad y almacenamiento.....                                                                                                | 23        |
| 5.2.2    Continuidad del suministro .....                                                                                               | 23        |
| 5.2.3    Fuente de suministro primaria .....                                                                                            | 23        |
| 5.2.4    Fuente de suministro secundaria.....                                                                                           | 23        |
| 5.2.5    Fuente(s) de suministro de reserva .....                                                                                       | 24        |
| 5.2.6    Medios de descarga de presión .....                                                                                            | 24        |
| 5.2.7    Ensamblado del suministro de mantenimiento .....                                                                               | 25        |
| 5.2.8    Reguladores de presión .....                                                                                                   | 25        |
| 5.2.9    (*) Esterilizadores que utilizan ozono .....                                                                                   | 25        |
| 5.3      Sistemas de suministro con botellas, bloques de botellas o depósito(s) de alta presión .....                                   | 26        |
| 5.4      Sistemas de suministro con recipientes criogénicos o no criogénicos .....                                                      | 26        |
| 5.5      Sistemas de suministro para aire.....                                                                                          | 27        |
| 5.5.1    Requisitos generales .....                                                                                                     | 27        |
| 5.5.2    Sistemas de suministro con compresor(es) de aire.....                                                                          | 27        |
| 5.5.3    Sistemas de suministro con unidad(es) mezcladora(s) .....                                                                      | 31        |
| 5.6      Sistemas de suministro con concentrador(es) de oxígeno.....                                                                    | 33        |
| 5.6.1    Requisitos generales .....                                                                                                     | 33        |
| 5.6.2    Fuente de suministro primaria .....                                                                                            | 33        |
| 5.6.3    Fuente de suministro secundaria.....                                                                                           | 34        |
| 5.6.4    Fuente de suministro de reserva.....                                                                                           | 34        |
| 5.6.5    Especificaciones para el oxígeno 93.....                                                                                       | 34        |
| 5.6.6    Unidad concentradora de oxígeno.....                                                                                           | 35        |
| 5.6.7    Depósitos de oxígeno 93.....                                                                                                   | 36        |
| 5.6.8    Analizadores de oxígeno.....                                                                                                   | 36        |
| 5.6.9    Llenado local de depósitos de alta presión permanentemente conectados, que funcionan como fuente de suministro de reserva..... | 36        |
| 5.7      Sistemas de suministro para vacío .....                                                                                        | 37        |
| 5.8      Ubicación de los sistemas de suministro .....                                                                                  | 38        |
| 5.9      Ubicación de los conectores de distribución de las botellas .....                                                              | 39        |
| 5.10    Ubicación de los recipientes criogénicos estacionarios .....                                                                    | 39        |

|           |                                                                                                                                                         |           |
|-----------|---------------------------------------------------------------------------------------------------------------------------------------------------------|-----------|
| <b>6</b>  | <b>Sistemas de monitorización y alarma.....</b>                                                                                                         | <b>39</b> |
| 6.1       | Generalidades .....                                                                                                                                     | 39        |
| 6.2       | Requisitos de la instalación .....                                                                                                                      | 40        |
| 6.3       | Señales de monitorización y alarma.....                                                                                                                 | 40        |
| 6.3.1     | Generalidades .....                                                                                                                                     | 40        |
| 6.3.2     | Señales sonoras .....                                                                                                                                   | 41        |
| 6.3.3     | Señales visuales .....                                                                                                                                  | 41        |
| 6.3.4     | Características de las alarmas de emergencia y de funcionamiento .....                                                                                  | 41        |
| 6.3.5     | Señales de información.....                                                                                                                             | 42        |
| 6.3.6     | Ampliaciones de la alarma a puntos distantes .....                                                                                                      | 42        |
| 6.4       | Provisión de alarmas de funcionamiento .....                                                                                                            | 42        |
| 6.5       | Provisión de alarmas clínicas de emergencia .....                                                                                                       | 43        |
| 6.6       | (*) Provisión de alarmas de funcionamiento de emergencia .....                                                                                          | 43        |
| <b>7</b>  | <b>Sistemas de distribución canalizada.....</b>                                                                                                         | <b>44</b> |
| 7.1       | Resistencia mecánica .....                                                                                                                              | 44        |
| 7.2       | Presión de distribución.....                                                                                                                            | 44        |
| 7.3       | Ensamblados de latiguillos de baja presión y conexiones flexibles de baja presión.....                                                                  | 46        |
| 7.4       | Sistemas de distribución canalizada de doble etapa .....                                                                                                | 46        |
| <b>8</b>  | <b>Válvulas de corte.....</b>                                                                                                                           | <b>47</b> |
| 8.1       | Generalidades .....                                                                                                                                     | 47        |
| 8.2       | Válvulas de corte de servicio.....                                                                                                                      | 48        |
| 8.3       | Válvulas de corte de zona.....                                                                                                                          | 48        |
| <b>9</b>  | <b>Unidades terminales, conectores selectivos del gas, unidades de suministro médico, reguladores de presión y manómetros .....</b>                     | <b>49</b> |
| <b>10</b> | <b>Marcado y código de color .....</b>                                                                                                                  | <b>50</b> |
| 10.1      | Marcado .....                                                                                                                                           | 50        |
| 10.2      | Código de color .....                                                                                                                                   | 50        |
| <b>11</b> | <b>Instalación de la canalización .....</b>                                                                                                             | <b>50</b> |
| 11.1      | Generalidades .....                                                                                                                                     | 50        |
| 11.2      | Soportes de la canalización .....                                                                                                                       | 52        |
| 11.3      | Uniones de la canalización .....                                                                                                                        | 52        |
| 11.4      | Ampliaciones y modificaciones de sistemas de canalización existentes.....                                                                               | 52        |
| <b>12</b> | <b>Ensayos y puesta en servicio .....</b>                                                                                                               | <b>53</b> |
| 12.1      | Generalidades .....                                                                                                                                     | 53        |
| 12.2      | Requisitos generales para los ensayos.....                                                                                                              | 53        |
| 12.3      | Inspecciones y comprobaciones antes de la ocultación.....                                                                                               | 54        |
| 12.4      | Ensayos, comprobaciones y procedimientos antes de utilizar el sistema .....                                                                             | 54        |
| 12.5      | Requisitos para las inspecciones y comprobaciones antes de la ocultación .....                                                                          | 55        |
| 12.5.1    | Inspección del marcado y de los soportes de la canalización .....                                                                                       | 55        |
| 12.5.2    | Comprobación de la conformidad con las especificaciones del diseño.....                                                                                 | 55        |
| 12.6      | Requisitos para los ensayos, comprobaciones y procedimientos antes de la utilización del sistema.....                                                   | 55        |
| 12.6.1    | Generalidades .....                                                                                                                                     | 55        |
| 12.6.2    | (*) Ensayos de fugas y de cierre de las válvulas de corte de zona y verificación de la zonificación correcta y la identificación correcta .....         | 57        |
| 12.6.3    | Ensayo de conexión cruzada .....                                                                                                                        | 58        |
| 12.6.4    | Ensayo de obstrucción y flujo.....                                                                                                                      | 58        |
| 12.6.5    | Comprobaciones del funcionamiento mecánico, selectividad del gas e identificación de las unidades terminales y de los conectores NIST, DISS o SIS ..... | 59        |
| 12.6.6    | Ensayos o comprobaciones de las prestaciones del sistema .....                                                                                          | 59        |
| 12.6.7    | (*) Ensayos de las válvulas de descarga de presión .....                                                                                                | 59        |

|                       |                                                                                                                                                                                                  |     |
|-----------------------|--------------------------------------------------------------------------------------------------------------------------------------------------------------------------------------------------|-----|
| 12.6.8                | Ensayos de todas las fuentes de suministro .....                                                                                                                                                 | 60  |
| 12.6.9                | Ensayos de los sistemas de monitorización y alarma .....                                                                                                                                         | 60  |
| 12.6.10               | Ensayo de contaminación por partículas de los sistemas de distribución canalizada .....                                                                                                          | 60  |
| 12.6.11               | Ensayos de la calidad del aire para uso médico producido por los sistemas de suministro con compresor(es) de aire .....                                                                          | 61  |
| 12.6.12               | Ensayos de la calidad del aire motriz para instrumentos quirúrgicos producido por los sistemas de suministro con compresor(es) de aire.....                                                      | 61  |
| 12.6.13               | Ensayos de la calidad del aire para uso médico producido por los sistemas de suministro con unidad(es) mezcladoras.....                                                                          | 61  |
| 12.6.14               | Ensayos de la calidad del oxígeno 93 producido por sistemas de suministro con concentrador(es) de oxígeno .....                                                                                  | 61  |
| 12.6.15               | Llenado con el gas específico .....                                                                                                                                                              | 61  |
| 12.6.16               | Ensayos de la identidad del gas .....                                                                                                                                                            | 61  |
| 12.6.17               | Verificación del reinicio después de un fallo de la alimentación eléctrica .....                                                                                                                 | 62  |
| 12.7                  | Declaración de la conformidad con esta parte de la Norma ISO 7396 .....                                                                                                                          | 62  |
| 13                    | Información a suministrar por el fabricante.....                                                                                                                                                 | 62  |
| 13.1                  | Generalidades .....                                                                                                                                                                              | 62  |
| 13.2                  | Instrucciones de instalación .....                                                                                                                                                               | 62  |
| 13.3                  | Instrucciones de uso.....                                                                                                                                                                        | 62  |
| 13.4                  | Información de la gestión operacional.....                                                                                                                                                       | 63  |
| 13.5                  | Dibujos “tal como se ha instalado” .....                                                                                                                                                         | 64  |
| 13.6                  | Diagramas eléctricos.....                                                                                                                                                                        | 64  |
| Anexo A (Informativo) | Representaciones esquemáticas de sistemas de suministro típicos y sistemas de distribución de zona .....                                                                                         | 65  |
| Anexo B (Informativo) | Recomendaciones para la ubicación de los conectores de distribución de botellas, zonas de almacenamiento de botellas y recipientes estacionarios para líquidos criogénicos y no criogénicos..... | 95  |
| Anexo C (Informativo) | Ejemplo de procedimiento para el ensayo y la puesta en servicio.....                                                                                                                             | 96  |
| Anexo D (Informativo) | Impresos típicos para documentar la conformidad de los sistemas de canalización para gases medicinales comprimidos y el vacío .....                                                              | 109 |
| Anexo E (Informativo) | Relaciones entre la temperatura y la presión.....                                                                                                                                                | 139 |
| Anexo F (Informativo) | Lista de comprobación de la gestión del riesgo .....                                                                                                                                             | 141 |
| Anexo G (Informativo) | Gestión operacional.....                                                                                                                                                                         | 158 |
| Anexo H (Informativo) | Justificación de los requisitos .....                                                                                                                                                            | 178 |
| Anexo I (Informativo) | Justificación de los requisitos para los peligros derivados de la utilización de compresores.....                                                                                                | 181 |
| Anexo J (Informativo) | Consideraciones sobre la implementación y utilización de oxígeno 93.....                                                                                                                         | 183 |
| Anexo K (Informativo) | Fabricación de gases medicinales en la instalación; responsabilidad de la calidad del gas medicinal .....                                                                                        | 185 |
| Bibliografía.....     |                                                                                                                                                                                                  | 188 |

## Prólogo

ISO (Organización Internacional de Normalización) es una federación mundial de organismos nacionales de normalización (organismos miembros de ISO). El trabajo de preparación de las normas internacionales normalmente se realiza a través de los comités técnicos de ISO. Cada organismo miembro interesado en una materia para la cual se haya establecido un comité técnico, tiene el derecho de estar representado en dicho comité. Las organizaciones internacionales, públicas y privadas, en coordinación con ISO, también participan en el trabajo. ISO colabora estrechamente con la Comisión Electrotécnica Internacional (IEC) en todas las materias de normalización electrotécnica.

En la parte 1 de las Directivas ISO/IEC se describen los procedimientos utilizados para desarrollar esta norma y para su mantenimiento posterior. En particular debería tomarse nota de los diferentes criterios de aprobación necesarios para los distintos tipos de documentos ISO. Esta norma se redactó de acuerdo a las reglas editoriales de la parte 2 de las Directivas ISO/IEC. [www.iso.org/directives](http://www.iso.org/directives).

Se llama la atención sobre la posibilidad de que algunos de los elementos de este documento puedan estar sujetos a derechos de patente. ISO no asume la responsabilidad por la identificación de cualquiera o todos los derechos de patente. Los detalles sobre cualquier derecho de patente identificado durante el desarrollo de esta norma se indican en la introducción y/o en la lista ISO de declaraciones de patente recibidas. [www.iso.org/patents](http://www.iso.org/patents).

Cualquier nombre comercial utilizado en esta norma es información que se proporciona para comodidad del usuario y no constituye una recomendación.

Para obtener una explicación sobre el significado de los términos específicos de ISO y expresiones relacionadas con la evaluación de la conformidad, así como información de la adhesión de ISO a los principios de la Organización Mundial del Comercio (OMC) respecto a los Obstáculos Técnicos al Comercio (OTC), véase la siguiente dirección: <http://www.iso.org/iso/foreword.html>.

El comité responsable de esta norma es el ISO/TC 121, *Equipos de anestesia y reanimación respiratoria*, Subcomité SC 6, *Sistemas de gases médicos*.

Esta tercera edición anula y sustituye a la segunda edición (ISO 7396-1:2007) y a la Norma ISO 10083:2006, que ha sido revisada técnicamente. También incorpora las Modificaciones ISO 7396-1:2007/Amd1:2010, ISO 7396-1:2007/Amd2:2010, e ISO 7396-1:2007/Amd3:2013.

La Norma ISO 7396 consta de las siguientes partes, bajo el título general *Sistemas de canalización de gases medicinales*:

- *Parte 1: Sistemas de canalización para gases medicinales comprimidos y de vacío.*
- *Parte 2: Sistemas finales de evacuación de gases anestésicos.*

## 0 Introducción

Muchas instalaciones sanitarias utilizan sistemas de canalización para suministrar gases para uso médico y proporcionar vacío a las zonas en donde se utilizan para el cuidado del paciente o para suministrar energía a equipos tales como ventiladores e instrumentos quirúrgicos.

Esta parte de la Norma ISO 7396 especifica los requisitos para los sistemas de canalización de gases medicinales, gases como productos sanitarios, gases para accionamiento de instrumentos quirúrgicos y el vacío. Está prevista para ser utilizada por aquellas personas a las que atañe el diseño, construcción, inspección y funcionamiento de las instituciones sanitarias en donde se tratan a seres humanos. Aquellas personas a las que atañe el diseño, fabricación y ensayo del equipo previsto para ser conectado a estos sistemas de canalización deberían tener en cuenta también el contenido de esta parte de la Norma ISO 7396.

Esta parte de la Norma ISO 7396 pretende garantizar que las canalizaciones de gases medicinales contienen solamente el gas selectivo (o vacío) que está previsto que suministren. Por esta razón, se utilizan componentes selectivos del gas para las unidades terminales y para otros conectores previstos para ser utilizados por el operador. Además, cada sistema se ensaya y certifica para contener solamente el gas selectivo (o vacío).

Los objetivos de esta parte de esta parte de la Norma ISO 7396 son garantizar lo siguiente:

- a) la no intercambiabilidad entre sistemas de canalización diferentes por diseño, instalación y ensayo;
- b) el suministro continuo de los gases y el vacío cuya calidad, presiones y caudales estén especificados mediante la provisión de las fuentes apropiadas;
- c) la utilización de los materiales adecuados;
- d) la limpieza de los componentes;
- e) la instalación correcta;
- f) la provisión de sistemas de monitorización y alarma;
- g) el marcado correcto del sistema de canalización;
- h) el ensayo y la puesta en servicio;
- i) la calidad de los gases suministrados por el sistema de canalización;
- j) la gestión operacional correcta;
- k) las características de seguridad de las fuentes para garantizar la calidad de los gases de acuerdo con la especificación.

La responsabilidad de la calidad del gas medicinal suministrado mediante el sistema de canalización del mismo se debería asignar a una persona designada al efecto dentro de la instalación sanitaria. El desempeño de esta función se asignaría normalmente al director farmacéutico, quien puede a su vez designar a otra u otras personas responsables localmente de la gestión diaria de los requisitos.

Cuando el gas medicinal lo suministra una tercera parte (en algunas jurisdicciones bajo licencia de la autoridad reglamentaria nacional, regional o local), el proveedor es responsable de garantizar que el gas medicinal tal como se entrega cumple los requisitos pertinentes de la especificación. En este caso, la instalación sanitaria es responsable, de acuerdo con la reglamentación local, de garantizar que el producto cumple las especificaciones en consonancia con el pedido, que el producto administrado a los pacientes no está adulterado y cumple las especificaciones y la reglamentación, y que el fabricante del producto es informado inmediatamente de cualquier efecto adverso o defecto de la calidad del producto.

Cuando la instalación sanitaria fabrica el gas en sus dependencias, por ejemplo, para aire para uso médico producido utilizando compresores de aire, aire para uso médico producido por sistemas de mezclas de gases en una proporción especificada u oxígeno 93 producido por sistemas concentradores de oxígeno, la instalación sanitaria es responsable de todos los aspectos de la calidad del gas medicinal.

NOTA La instalación sanitaria es también responsable del vacío.

El anexo G proporciona las recomendaciones para la asignación de responsabilidad para la producción y control de la calidad de los gases y el vacío.

Las autoridades reglamentarias nacionales, regionales o locales pueden requerir que el fabricante de los gases para uso médico en la instalación sanitaria tenga una licencia al efecto.

Los anexos G y K proporcionan algunas recomendaciones sobre cómo gestionar la calidad del gas para garantizar la seguridad del paciente al más alto nivel.

El anexo H contiene la justificación para algunos de los requisitos de esta parte de la Norma ISO 7396. Se incluye para proporcionar una visión adicional sobre el razonamiento que condujo a los requisitos y a las recomendaciones que se han incorporado en esta parte de la Norma ISO 7396. Los capítulos y apartados marcados con asterisco (\*) después de su número tienen una justificación correspondiente en el anexo H.

## 1 (\*) Objeto y campo de aplicación

Esta parte de la Norma ISO 7396 especifica los requisitos para el diseño, la instalación, el funcionamiento, las prestaciones, los ensayos y la puesta en servicio y documentación de los sistemas de canalización utilizados en instituciones sanitarias para lo siguiente:

- oxígeno;
- óxido nitroso;
- aire para uso médico;
- dióxido de carbono;
- mezclas de oxígeno/óxido nitroso (véase la Nota 1);
- mezclas de helio/oxígeno;
- (\*) oxígeno 93;
- gases y mezclas de gases clasificadas como productos sanitarios, gases administrados a productos sanitarios o previstos para fines medicinales o gases y mezclas de gases para uso medicinal no especificadas en lo que precede;
- aire motriz para instrumentos quirúrgicos;
- nitrógeno motriz para instrumentos quirúrgicos;
- vacío.

NOTA 1 La reglamentación regional o nacional puede prohibir la distribución de las mezclas de oxígeno/óxido nitroso en los sistemas de canalización de gases medicinales.

NOTA 2 Los sistemas de evacuación de gases anestésicos están cubiertos en la Norma ISO 7396-2.

Esta parte de la Norma ISO 7396 incluye los requisitos para los sistemas de suministro, sistemas de distribución canalizada, sistemas de control, sistemas de monitorización y alarma y dispositivos que impiden que se puedan intercambiar las conexiones entre componentes de sistemas de gases diferentes/vacío.

Esta parte de la Norma ISO 7396 especifica los requisitos de seguridad para los sistemas de canalizaciones utilizados en las instituciones sanitarias, tanto públicas como privadas. Es aplicable a todas las instituciones que proporcionan servicios sanitarios sea cual fuere su tipo, tamaño, ubicación o gama de servicios, incluidos entre otros:

- a) unidades de hospitalización de agudos;
- b) unidades de cuidados continuos para pacientes internos;
- c) centros de atención sanitaria a largo plazo;
- d) prestadores de servicios sanitarios a comunidades de pacientes;
- e) clínicas para pacientes ambulatorios y externos (por ejemplo, cirugía ambulatoria, unidades de endoscopias y consultorios médicos).

NOTA 3 Esta parte de la Norma ISO 7396 se puede utilizar también para sistemas de canalización de gases medicinales y vacío previstas para ser instaladas en lugares que no son instituciones sanitarias.

Esta parte de la Norma ISO 7396 es aplicable a los siguientes tipos diferentes de sistemas de suministro de oxígeno:

- sistemas de suministro en los que todas las fuentes de suministro administran oxígeno; en este caso, la concentración de oxígeno será superior a 99%;
- sistemas de suministro en los que todas las fuentes de suministro administran oxígeno 93; en esta caso la concentración de oxígeno puede variar entre 90% y 96%.

NOTA 4 Un sistema de suministro de gas medicinal puede administrar una mezcla de oxígeno 93 y oxígeno. En este caso, la concentración de oxígeno puede variar entre 90% y > 99%.

Esta parte de la Norma ISO 7396 es aplicable también a:

- las ampliaciones de los sistemas de distribución de canalizaciones existentes;
- las modificaciones de los sistemas de distribución de canalizaciones existentes;
- las modificaciones o la sustitución de sistemas de suministro o fuentes de suministro.

Los concentradores de oxígeno para uso a domicilio se excluyen del objeto y campo de aplicación de esta parte de la Norma ISO 7396.

NOTA 5 Los requisitos para los concentradores de oxígeno para uso a domicilio se especifican en la Norma ISO 80601-2-69.

(\*) La Norma EN 14931 define los requisitos adicionales para la aplicación hiperbárica, en particular para los flujos y presiones de aire comprimido requeridos para presurizar las cámaras hiperbáricas y para accionar otros servicios conectados. Se incluyen también los requisitos para el oxígeno y otros gases de tratamiento administrados a los pacientes.

Esta parte de la Norma ISO 7396 no es aplicable a los sistemas de vacío previstos para utilización en odontología.

Esta parte de la Norma ISO 7396 no es aplicable a los sistemas de llenado para botellas transportables y sistemas de bloques de botellas transportables.



## 2 Normas para consulta

Los documentos indicados a continuación, en su totalidad o en parte, son normas para consulta indispensables para la aplicación de este documento. Para las referencias con fecha, sólo se aplica la edición citada. Para las referencias sin fecha se aplica la última edición (incluyendo cualquier modificación de ésta).

NOTA Referencias adicionales se enumeran en la Bibliografía.

ISO 3746:2010, *Acústica. Determinación de los niveles de potencia acústica y de los niveles de energía acústica de fuentes de ruido a partir de la presión acústica. Método de control utilizando una superficie de medición envolvente sobre un plano reflectante.*

ISO 5359:2014, *Equipo respiratorio y de anestesia. Latiguillos de baja presión para utilización con gases medicinales.*

ISO 8573-1:2010, *Compressed air. Part 1: Contaminants and purity classes.*

ISO 9170-1:2008, *Unidades terminales para sistemas de canalización de gases medicinales. Parte 1: Unidades terminales para gases medicinales comprimidos y de vacío.*

ISO 10524-2:2005, *Reguladores de presión para la utilización con gases medicinales. Parte 2: Reguladores de presión para colector y de línea.*

ISO 11197:2004, *Unidades de suministro médico.*

ISO 14644-1:1999, *Salas limpias y locales anexos. Parte 1: Clasificación de la limpieza del aire.*

ISO 14971:2007, *Productos sanitarios. Aplicación de la gestión de riesgos a los productos sanitarios.*

ISO 15001:2010, *Equipo respiratorio y de anestesia. Compatibilidad con oxígeno.*

ISO 17672:2010, *Soldeo fuerte. Metales de aportación.*

ISO 18082:2014, *Equipo respiratorio y de anestesia. Dimensiones de los conectores roscados no intercambiables (NIST) a baja presión para gases medicinales.*

ISO 21969:2009, *Conexiones flexibles de alta presión para utilización con sistemas de gases medicinales.*

ISO 29463-1:2011, *High-efficiency filters and filter media for removing particles in air. Part 1: Classification, performance testing and marking.*

ISO 80601-2-69:2014, *Equipos electromédicos. Parte 2-69: Requisitos particulares para la seguridad básica y funcionamiento esencial de los equipos concentradores de oxígeno.*

IEC 60601-1-8:2006, *Equipos electromédicos. Parte 1-8: Requisitos generales para la seguridad básica y funcionamiento esencial. Norma colateral: Requisitos generales, ensayos y guía para los sistemas de alarma en equipos electromédicos y sistemas electromédicos.*

EN 286-1:1998, *Recipientes a presión simple, no sometidos a la llama, diseñados para contener aire o nitrógeno. Parte 1: Recipientes a presión para usos generales.*

EN 1041:2008, *Información proporcionada por el fabricante de productos sanitarios.*

EN 1254-1:1998, *Cobre y aleaciones de cobre. Accesorios. Parte 1: Accesorios para soldeo o soldeo fuerte por capilaridad para tuberías de cobre.*

EN 1254-4:1998, *Cobre y aleaciones de cobre. Accesorios. Parte 4: Accesorios para soldar por capilaridad o de compresión para montar con otros tipos de conexiones.*

EN 13348:2008, *Cobre y aleaciones de cobre. Tubos redondos de cobre, sin soldadura, para gases medicinales o vacío.*

### 3 Términos y definiciones

Para los fines de este documento, se aplican los términos y definiciones siguientes:

#### 3.1 sistema compresor de aire:

Sistema de suministro con uno o más compresores, diseñado para proporcionar aire para uso médico o aire motriz para instrumentos quirúrgicos o ambos.

#### 3.2 aire motriz para instrumentos quirúrgicos:

Mezcla natural o sintética de gases, compuesta principalmente por oxígeno y nitrógeno en proporciones especificadas, con límites definidos para la concentración de contaminantes, suministrada por un sistema de canalización de gases medicinales y prevista para ser utilizada como fuente de energía motriz para instrumentos quirúrgicos.

NOTA 1 Se utilizan nombres o símbolos diferentes para el aire motriz para instrumentos quirúrgicos, tales como aire para instrumental, aire quirúrgico, aire motor, aire – 700 y aire – 800.

#### 3.3 pausa de audio:

Estado de duración limitada en el que el sistema de alarma o parte del mismo no genera una señal de alarma sonora.

NOTA 1 Esto se denomina a veces silenciado del audio.

[FUENTE: IEC 60601-1-8]

#### 3.4 compresor elevador de presión:

Compresor utilizado para aumentar una presión elevada hasta una presión más alta.

NOTA 1 Tal como se usa aquí, el término se aplica a compresores utilizados para llenar uno o más depósitos de alta presión.

#### 3.5 rama:

Porción del sistema de distribución canalizada que suministra el gas a una o más zonas del mismo piso de la instalación.

#### 3.6 puesta en servicio:

Demostración del funcionamiento para verificar que la especificación del sistema acordada se cumple y es aceptada por el usuario o su representante.

#### 3.7 equipo de control:

Aparatos necesarios para mantener al sistema de canalización de gases medicinales dentro de los parámetros de funcionamiento especificados.

NOTA 1 Ejemplos de equipo de control son los reguladores de presión, las válvulas de descarga de presión, los sensores, las válvulas manuales o automáticas y las válvulas unidireccionales.

#### 3.8 sistema de control:

Dispositivo o conjunto de dispositivos para gestionar, transmitir órdenes, dirigir o regular el comportamiento de otro u otros dispositivos o sistemas.

**3.9 sistema de líquido criogénico:**

Sistema de suministro que contiene un gas almacenado en estado líquido en un recipiente a temperaturas inferiores a - 150 °C.

**3.10 bloque de botellas:**

Conjunto o plataforma de botellas unidas conjuntamente con uno o más conectores para su llenado y vaciado.

**3.11 factor de diversificación:**

Factor que representa la proporción máxima de unidades terminales en una zona clínica definida, que se utilizarán de forma simultánea con caudales definidos de acuerdo con la dirección de la instalación sanitaria.

**3.12 sistema de distribución canalizada de doble etapa:**

Sistema de distribución canalizada en el cual el gas se distribuye inicialmente desde el sistema de suministro a una presión superior a la presión de distribución nominal, y esta presión es posteriormente reducida a la presión de distribución nominal mediante reguladores de presión de la línea.

NOTA 1 Esta presión superior inicial es la presión nominal del sistema de suministro (véase 3.38).

**3.13 alarma clínica de emergencia:**

Alarma para indicar al personal médico y técnico que existe una desviación de un parámetro monitorizado que requiere una respuesta inmediata.

**3.14 punto de entrada de emergencia:**

Punto de entrada que permite la conexión de un suministro de emergencia.

**3.15 alarma de funcionamiento de emergencia:**

Alarma para indicar al personal técnico que existe una desviación de un parámetro monitorizado que requiere una respuesta inmediata.

**3.16 suministro de emergencia:**

Fuente de suministro prevista para ser conectada a un punto de entrada de emergencia.

**3.17 selectivo(a) de un gas:**

Que posee características que impiden las conexiones entre servicios de gases o servicios de vacío diferentes.

**3.18 conector selectivo de un gas:**

Conector con características dimensionales que impiden las conexiones entre servicios de gases diferentes.

NOTA 1 Ejemplos de conectores selectivos de un gas son los conectores rápidos, los conectores roscados, los conectores de sistema de seguridad por índice de diámetro (DISS), los conectores roscados no intercambiables (NIST) y los conectores con sistema de índice del manguito (SIS).

**3.19 gas para uso medicinal:**

Gas o mezcla de gases que posee propiedades para tratar o impedir enfermedades en seres humanos, que se puede utilizar o administrar para restaurar, corregir o modificar funciones fisiológicas mediante una acción farmacológica, inmunológica o metabólica, o para obtener un diagnóstico médico.

NOTA 1 Denominado a veces gas medicinal.

NOTA 2 En Europa, este producto está clasificado como un medicamento de acuerdo con la Directiva 2001/83/CE.

**3.20 gas producto sanitario:**

Gas o mezcla de gases prevista por el fabricante para ser utilizada por seres humanos con el fin siguiente:

- diagnóstico, prevención, control, tratamiento o alivio de una enfermedad;
- investigación, sustitución o modificación de la anatomía o de un proceso fisiológico;
- regulación de la concepción;

y que no ejerza la acción principal que se desee obtener en el interior o en la superficie del cuerpo humano por medios farmacológicos, inmunológicos ni metabólicos, pero a cuya función puedan contribuir tales medios.

NOTA 1 En Europa estos gases se clasifican como un producto sanitario de acuerdo con la Directiva 93/42/CEE.

**3.21 instalación sanitaria:**

Hospital, clínica o instalación similar que proporciona asistencia sanitaria para los pacientes que la precisan.

**3.22 paciente de alta dependencia:**

Paciente con una necesidad continua de un suministro de gas medicinal/vacío, que será afectado de forma adversa por un fallo del suministro del gas medicinal/vacío hasta un grado tal que su condición clínica o su seguridad pueden estar comprometidas.

**3.23 alta presión:**

Presión superior a 3 000 kPa.

[FUENTE: ISO 15001:2001]

**3.24 depósito de alta presión:**

Recipiente(s) permanentemente instalado(s) con presiones de trabajo nominales comprendidas entre 3 000 kPa y 25 000 kPa a 15 °C.

**3.25 señal de información:**

Señal que no es una señal de alarma ni una señal recordatoria.

**3.26 regulador de presión de la línea:**

Regulador de presión utilizado en un sistema de distribución canalizada de doble etapa para reducir la presión del sistema de suministro nominal a la presión de distribución nominal.

**3.27 latiguillo de baja presión:**

Ensamblado que comprende una manguera flexible dotada de conectores de entrada y salida selectivos de un gas unidos de forma permanente y diseñado para que circule a través del mismo un gas medicinal a presiones inferiores a 1 400 kPa.

**3.28 línea principal:**

Porción del sistema de distribución canalizada que conecta el sistema de suministro a las ascendentes y/o a las ramas.

**3.29 ensamblado del suministro de mantenimiento:**

Punto de entrada que permite la conexión de un suministro de mantenimiento.

**3.30 suministro de mantenimiento:**

Fuente de suministro prevista para abastecer al sistema durante el mantenimiento.

**3.31 conector de distribución; múltiple:**

Dispositivo para conectar la(s) salida(s) de una o más botellas, bloques de botellas o depósito(s) de alta presión del mismo gas al sistema de canalización.

**3.32 regulador de presión del conector de distribución:**

Regulador de presión previsto para ser instalado dentro de fuentes de suministro que contengan botellas, bloques de botellas o depósito(s) de alta presión.

**3.33 fabricante:**

La persona física o jurídica responsable del diseño, fabricación, acondicionamiento y etiquetado de un producto antes de su puesta en el mercado con vistas a la comercialización de éste en su propio nombre, independientemente de que estas operaciones sean efectuadas por esta misma persona o por un tercero por cuenta de aquélla.

**3.34 presión de distribución máxima:**

Presión en cualquier unidad terminal cuando el sistema de canalización está funcionando a un valor cero del caudal de gas.

**3.35 aire para uso médico:**

Mezcla natural o sintética de gases, compuesta principalmente de oxígeno y nitrógeno en proporciones especificadas, con límites definidos para la concentración de contaminantes, suministrada por un sistema de canalización de gases medicinales y prevista para la administración a pacientes.

NOTA 1 El aire para uso médico se puede producir utilizando sistemas de suministro con compresores de aire o mediante sistemas de suministro con unidades mezcladoras. La Farmacopea Europea denomina el aire para uso médico producido por sistemas de compresores de aire "aire medicinal", y el aire para uso médico producido por sistemas mezcladores "aire medicinal sintético".

**3.36 sistema de canalización de gases medicinales:**

Sistema completo que comprende un sistema de suministro, un sistema de monitorización y de alarma y un sistema de distribución con unidades terminales en los puntos donde se requieren los gases para uso médico o el vacío

**3.37 presión de distribución mínima:**

Presión más baja que existe en cualquier unidad terminal cuando el sistema de canalización está funcionando al caudal de diseño del sistema.

**3.38 presión de distribución nominal:**

Presión prevista que el sistema de canalización del gas medicinal mantiene en las unidades terminales.

**3.39 presión nominal del sistema de suministro:**

Presión prevista que el sistema de suministro mantiene a la entrada de los reguladores de presión de la línea.

**3.40 sistema de líquido no criogénico:**

Sistema de suministro que contiene gas almacenado a presión en estado líquido en un recipiente a temperaturas no inferiores a  $-50\text{ }^{\circ}\text{C}$ .

**3.41 válvula unidireccional (antirretorno):**

Válvula que permite el flujo solamente en una dirección.

**3.42 alarma de funcionamiento:**

Alarma que indica al personal técnico que es necesario restablecer el suministro de gas o corregir un fallo de funcionamiento.

**3.43 sistema de suministro del concentrador de oxígeno:**

Sistema de suministro que contiene una o más unidades del concentrador de oxígeno.

**3.44 unidad concentradora de oxígeno:**

Componente de la fuente de suministro que produce oxígeno 93 a partir del aire ambiente por extracción del nitrógeno.

**3.45 oxígeno:**

Gas para uso medicinal en el que la concentración de oxígeno es al menos la mínima especificada en la monografía pertinente de la farmacopea.

**3.46 oxígeno 93:**

Gas producido por una unidad concentradora de oxígeno cuya concentración está comprendida dentro de los límites especificados en la monografía pertinente de la farmacopea.

**3.47 demanda máxima:**

Caudal de gas previsible máximo requerido por una instalación sanitaria.

NOTA 1 Este valor se expresa comúnmente en litros por minuto.

**3.48 sistema de distribución canalizada:**

Porción de un sistema de canalización de gases medicinales o de vacío que conecta las fuentes de suministro del sistema de suministro con las unidades terminales.

**3.49 regulador de presión:**

Dispositivo que reduce la presión de entrada y mantiene la presión de salida ajustada dentro de los límites especificados.

**3.50 válvula de descarga de presión:**

Dispositivo previsto para liberar la presión en exceso hasta un valor de la presión preseleccionado.

**3.51 fuente de suministro primaria:**

Porción del sistema de suministro que abastece al sistema de distribución canalizada.

**3.52 unidad mezcladora:**

Dispositivo en el cual los gases se mezclan en una proporción especificada.

**3.53 receptor:**

Uno o más recipientes permanentemente instalados diseñados para aplicación de vacío.

NOTA 1 Véase también depósito (3.56).

**3.54 fuente de suministro de reserva:**

Aquella porción del sistema de suministro que abastece al sistema de distribución canalizada completo, o a una o más porciones del mismo, cuando se produce un fallo o el agotamiento de ambas fuentes de suministro primaria y secundaria.

**3.55 ascendente:**

Porción del sistema de distribución canalizada que atraviesa uno o más pisos y que conecta la línea principal con las ramas en diversos niveles.

**3.56 depósito:**

Uno o más recipientes permanentemente instalados para almacenar gas a presiones hasta 3 000 kPa.

NOTA 1 Véase también receptor (3.53).

**3.57 seguridad:**

Ausencia de riesgo inaceptable.

**3.58 fuente de suministro secundaria:**

Porción del sistema de suministro que abastece al sistema de distribución canalizada en caso de agotamiento o fallo de la fuente de suministro primaria.

**3.59 válvula de corte; válvula de aislamiento:**

Válvula que impide el flujo en ambas direcciones cuando se cierra.

**3.60 condición de primer fallo:**

Condición en la que un único medio de protección frente a un peligro para la seguridad del equipo es defectuoso, o en la que está presente una única condición anormal externa.

NOTA 1 El mantenimiento planificado del equipo se considera una condición normal.

**3.61 sistema de distribución canalizada de una sola etapa:**

Sistema de distribución canalizada en el que el gas se distribuye desde el sistema de suministro a la presión de distribución nominal.

**3.62 fuente de suministro:**

Porción del sistema de suministro dotado de equipo de control asociado que abastece al sistema de distribución canalizada.

**3.63 regulador de la presión de suministro:**

Regulador de presión acoplado dentro de una fuente de suministro y previsto para regular la presión suministrada al(a los) regulador(es) de presión de la línea.

NOTA 1 Para una fuente de suministro con botellas, bloques de botellas o depósito(s) de alta presión, esto se denomina el regulador de presión del conector de distribución (también denominado múltiple).

**3.64 sistema de suministro:**

Ensamblado que abastece al sistema de distribución canalizada y que incluye todas las fuentes de suministro.

**3.65 caudal de diseño del sistema:**

Caudal calculado a partir del caudal máximo requerido por la instalación sanitaria y corregido teniendo en cuenta el(los) factor(es) de diversificación.

**3.66 unidad terminal:**

Ensamblado de salida (de entrada para el vacío) en un sistema de canalización de gases medicinales, en donde el operador efectúa las conexiones y desconexiones.

**3.67 sistema de alimentación ininterrumpida, SAI:**

Combinación de convertidores, interruptores y dispositivos de almacenamiento de energía (tales como baterías), que constituyen un sistema de alimentación para mantener la continuidad del suministro de potencia eléctrica en caso de producirse un fallo de la energía de red.

NOTA 1 El suministro de energía eléctrica en las instalaciones sanitarias de emergencia pueden no asegurar la continuidad del suministro.

**3.68 sistema de suministro para el vacío:**

Sistema de suministro equipado con bombas de vacío, diseñado para proporcionar un caudal a presión subatmosférica.

**4 Requisitos generales****4.1 (\*) Seguridad**

Los sistemas de canalización de gases medicinales, cuando se instalan, se amplían, se modifican, se ponen en servicio, se hacen funcionar y se mantienen de conformidad con las instrucciones del fabricante, no deben presentar ningún riesgo con un nivel inaceptable en una condición normal y en una condición de primer fallo.

NOTA 1 Una situación en la que un fallo no se detecta se considera una condición normal. Las condiciones de fallo/situaciones peligrosas pueden permanecer sin ser detectadas durante cierto tiempo y como consecuencia, pueden conducir a un riesgo inaceptable. En tal caso, una condición de fallo detectada posteriormente es necesario considerarla como una condición de primer fallo. Es necesario determinar las medidas de control de los riesgos específicas para tratar tales situaciones dentro del proceso de gestión del riesgo.

NOTA 2 Los peligros de seguridad típicos (incluyendo la discontinuidad del suministro, la presión y/o caudal incorrectos, el suministro del gas equivocado, la composición de gas errónea, la contaminación, la fuga, el incendio) se enumeran en el anexo F.

Los sistemas de suministro y sistemas de alarma se deberían diseñar y fabricar para:

- a) minimizar el riesgo que resulta de la emisión de campos electromagnéticos que podrían causar interferencias en otros equipos y productos sanitarios utilizados dentro de la instalación sanitaria y
- b) tener el nivel apropiado de inmunidad electromagnética para funcionar de forma segura dentro del entorno electromagnético de las instituciones sanitarias.

Puede existir reglamentación nacional o regional. La Norma IEC 60601-1-2 puede ser aplicable al equipo clasificado como producto sanitario.

NOTA 3 La pérdida de energía de red o del suministro de agua es una condición de primer fallo. Un fallo en el equipo de control es una condición de primer fallo.

Se deberían tomar medidas para minimizar los peligros eléctricos y mecánicos. Puede existir reglamentación nacional o regional que regule tales peligros.

NOTA 4 El mantenimiento planificado de los equipos se considera una condición normal.

**4.2 (\*) Construcción alternativa**

El sistema de suministro, los sistemas de monitorización y de alarma, los sistemas y componentes de distribución canalizada o partes de los mismos, que utilicen materiales o tengan formas de construcción diferentes de los especificados en esta parte de la Norma ISO 7396, se deben aceptar como conformes con los objetivos de seguridad de esta parte de la Norma ISO 7396 si se puede demostrar que se obtiene un grado de seguridad equivalente (es decir, la conformidad con los requisitos supone que los riesgos se han reducido hasta los niveles aceptables) a menos que se disponga de evidencia objetiva de lo contrario.

NOTA 1 La evidencia objetiva se puede obtener mediante la vigilancia de poscomercialización.

El fabricante debe proporcionar la evidencia de que se obtiene un grado de seguridad equivalente.

NOTA 2 La reglamentación regional o nacional puede requerir la provisión de la evidencia a una autoridad competente o a un organismo de evaluación de la conformidad, por ejemplo, a un organismo notificado en el Área Económica Europea cuando así lo solicite.



## 4.3 Materiales

**4.3.1** (\*) El fabricante debe revelar, cuando así se solicite, la evidencia de la resistencia a la corrosión de los materiales utilizados en los componentes para el gas particular.

NOTA La resistencia a la corrosión incluye la resistencia contra la influencia de la humedad condensante y de los materiales circundantes.

**4.3.2** (\*) El fabricante debe revelar, cuando así se solicite, la evidencia de que los materiales utilizados en los componentes del sistema de canalización del gas medicinal que entren en contacto con el gas particular, son compatibles con el gas particular y el oxígeno en una condición normal y en condiciones de primer fallo. Si se utilizan lubricantes, excepto dentro de los compresores de aire y de las bombas de vacío, deben ser compatibles con el gas particular y el oxígeno durante una condición normal y en condición de primer fallo del sistema de canalización. Véase el apartado 4.3.6.

El fabricante debe proporcionar la evidencia de la conformidad.

NOTA 1 Los criterios para la selección de los materiales metálicos y no metálicos se dan en las Normas ISO 15001, ISO 11114-1 e ISO 11114-2.

NOTA 2 La reglamentación regional o nacional puede requerir la provisión de la evidencia a un organismo notificado o a una autoridad competente cuando así se solicite.

NOTA 3 La compatibilidad con el oxígeno implica tanto la combustibilidad como la facilidad de ignición. Los materiales que arden en el aire, lo hacen violentamente en oxígeno puro. Muchos materiales que no arden en el aire, lo hacen en oxígeno puro, especialmente a presión. De forma similar, los materiales que pueden arder en el aire requieren menos energía para arder en oxígeno puro. Muchos de tales materiales pueden entrar en ignición por fricción en un asiento de válvula o por compresión adiabática producida cuando se introduce oxígeno rápidamente a alta presión en un sistema inicialmente a baja presión.

**4.3.3** Se deben contemplar los peligros específicos de los productos tóxicos derivados del calentamiento, combustión o descomposición de los materiales no metálicos (incluyendo los lubricantes, si se utilizan) y de los contaminantes potenciales.

El anexo E de la Norma ISO 15001:2010 da información sobre los métodos adecuados de ensayo y de análisis cuantitativo para los productos de combustión de materiales no metálicos. Los datos de tales ensayos se deben considerar en cualquier evaluación del riesgo.

NOTA 1 Algunos productos potenciales de la combustión y/o descomposición para algunos materiales no metálicos comúnmente disponibles se enumeran en la tabla D.7 de la Norma ISO 15001:2010.

NOTA 2 Véase el anexo I, Justificación de los peligros derivados del compresor.

**4.3.4** (\*) Los componentes de los sistemas que se pueden exponer a la presión de la botella en una condición normal o en condición de primer fallo deben funcionar de acuerdo con sus especificaciones después de ser expuestos a una presión de 1,5 veces la presión de trabajo de la botella durante 5 min.

El fabricante debe proporcionar la evidencia de la conformidad.

NOTA La reglamentación regional o nacional puede requerir la provisión de la evidencia a un organismo notificado o a una autoridad competente cuando así se solicite.

**4.3.5** (\*) Los componentes de los sistemas que se pueden exponer a una presión superior a 3 000 kPa en una condición normal o en condición de primer fallo no deben arder ni mostrar daños de quemadura interna cuando se someten a choques de presión de oxígeno. El ensayo de resistencia a la ignición debe efectuarse de acuerdo con la Norma ISO 10524-2:2005.

El fabricante debe proporcionar la evidencia de la conformidad.

NOTA La reglamentación regional o nacional puede requerir la provisión de la evidencia a un organismo notificado o a una autoridad competente cuando así se solicite.

**4.3.6** (\*) Excepto para ensamblados de latiguillos de baja presión y conexiones flexibles de baja presión, se deben utilizar materiales metálicos para las canalizaciones de gases medicinales comprimidos. Si se utilizan tubos de cobre de diámetro  $\leq 133$  mm para las canalizaciones, deben cumplir la Norma EN 13348. Los tubos de cobre de diámetro  $> 133$  mm y los tubos de materiales diferentes al cobre que se utilizan para los gases medicinales comprimidos deben cumplir todos los requisitos aplicables de la Norma EN 13348 (en particular, los requisitos relativos a la limpieza, marcado y envasado) o las normas nacionales equivalentes. Si se utilizan materiales no metálicos para las canalizaciones de vacío, estos materiales deben ser compatibles con los contaminantes potenciales que pueden estar presentes en el sistema de vacío.

NOTA 1 La reglamentación regional o nacional puede requerir la provisión de la evidencia a un organismo notificado o a una autoridad competente cuando así se solicite.

NOTA 2 El cobre es el material preferido para todas las canalizaciones de gases medicinales. Para el vacío, se utilizan comúnmente tubos de cobre y de plástico.

**4.3.7** Los componentes del sistema que no sean los tubos, susceptibles de entrar en contacto con el gas particular, deben cumplir los requisitos de limpieza de la Norma ISO 15001:2010.

NOTA En la Norma ISO 15001:2010 se describen ejemplos de los procedimientos de limpieza.

**4.3.8** (\*) Los materiales para las canalizaciones y los componentes instalados en la vecindad de campos magnéticos o electromagnéticos fuertes [por ejemplo, resonancia magnética nuclear (NMR), obtención de imágenes por resonancia magnética (MRI)] se deben seleccionar para ser compatibles con estas aplicaciones.

## 4.4 Diseño del sistema

### 4.4.1 Generalidades

Cuando se efectúa el diseño del proyecto, la dirección de la instalación sanitaria, en colaboración con el fabricante del sistema, debe determinar las características esenciales para la construcción del sistema, que deberían incluir al menos:

- el tipo de fuentes de suministro;
- la ubicación de las fuentes de suministro;
- el caudal y la capacidad de almacenamiento de las fuentes de suministro;
- el número de unidades terminales por espacio de cama/espacio de trabajo;
- la ubicación de las unidades terminales en cada departamento o zona de la instalación sanitaria;
- el caudal correspondiente en cada unidad terminal;
- los factores de diversificación;
- la ubicación y la elevación de las válvulas de corte de la zona;
- la necesidad de fuentes de suministro locales adicionales en departamentos designados (por ejemplo, en departamentos donde se traten pacientes de alta dependencia, una unidad de vacío independiente o una o más fuentes independientes de oxígeno u oxígeno 93, y aire para uso médico en caso de un suceso catastrófico).

NOTA 1 Puede existir reglamentación regional o nacional aplicable al número de botellas o a la cantidad de gas dentro de cada departamento.

NOTA 2 Ejemplos típicos de la ubicación de unidades terminales, de los requisitos de caudal y de los factores de diversificación se dan en los documentos HTM 02<sup>[33],[34]</sup>, FD S 90-155<sup>[32]</sup>, AS 2896-1998<sup>[22]</sup> y SIS/HB 370<sup>[38]</sup>.

El dimensionamiento de las canalizaciones debe tener en cuenta los peligros potenciales que se derivan de la velocidad alta del gas.

NOTA 3 Ejemplos de la velocidad de gas máxima recomendada se dan en los documentos FD S 90-155 <sup>[32]</sup> y SIS/HB 370 <sup>[38]</sup>.

#### **4.4.2 Ampliaciones y modificaciones de sistemas de canalización existentes**

Las ampliaciones y modificaciones de los sistemas de canalización existentes (incluidas las ampliaciones y modificaciones de las fuentes de suministro existentes) deben cumplir los requisitos pertinentes de esta parte de la Norma ISO 7396. Además, se aplican los requisitos siguientes:

NOTA Ejemplos típicos de la ubicación de unidades terminales, de los requisitos de caudal y de los factores de diversificación se dan en los documentos HTM 02-01 <sup>[33],[34]</sup>, FD S 90-155 <sup>[32]</sup>, AS 2896-1998 <sup>[22]</sup> y SIS/HB 370 <sup>[38]</sup>.

- a) la capacidad de caudal del sistema de suministro debe continuar cumpliendo los requisitos de caudal del sistema de canalización ampliado o modificado. Para este fin, podría ser necesario renovar el sistema de suministro existente;
- b) las características del caudal, de la presión de distribución nominal y del descenso de presión del sistema de distribución canalizada existente deben continuar cumpliendo al menos las especificaciones del diseño originales;
- c) las características del caudal, de la presión de distribución nominal y del descenso de presión de la ampliación o modificación del sistema de distribución canalizada existente deben cumplir los requisitos del apartado 7.2. Para este fin, podría ser necesario modificar el sistema de distribución canalizada existente;
- d) Cuando se requieren ampliaciones o modificaciones, las características del diseño de los sistemas de canalización existentes deben continuar cumpliendo al menos las características de diseño originales.

## **5 Sistemas de suministro**

### **5.1 Componentes del sistema**

**5.1.1** Excepto para el aire o nitrógeno motriz para instrumentos quirúrgicos, cada sistema de suministro debe comprender al menos tres fuentes de suministro independientes que pueden ser una combinación de las siguientes:

- a) gas en botellas, bloques de botellas o depósito(s) de alta presión;
- b) líquido no criogénico en botellas;
- c) líquido criogénico o no criogénico en recipientes móviles;
- d) líquido criogénico o no criogénico en recipientes estacionarios;
- e) una unidad de compresor de aire;
- f) una unidad mezcladora;
- g) una unidad concentradora de oxígeno.

**5.1.2** Un sistema de suministro para aire o nitrógeno motriz para instrumentos quirúrgicos debe comprender al menos dos fuentes de suministro.

**5.1.3** Un sistema de suministro para el vacío debe estar constituido al menos por tres bombas de vacío.

**5.1.4** Las representaciones esquemáticas de los sistemas de suministro típicos se dan en el anexo A (véanse las figuras A.1 a A.21).

## 5.2 Requisitos generales

### 5.2.1 Capacidad y almacenamiento

La capacidad y almacenamiento de cualquier sistema de suministro se debe basar en la demanda de caudal, la utilización y la frecuencia de utilización estimadas. El fabricante del sistema debe tener en cuenta la ubicación y la capacidad de las fuentes de suministro primarias, secundarias y de reserva de todos los sistemas de suministro y el número de botellas y bloques de botellas llenas que se guardan almacenadas, definidas por la dirección de la instalación sanitaria en colaboración con el proveedor de gas utilizando los principios de gestión del riesgo. Las botellas y los bloques de botellas se deberían mantener almacenadas en un lugar seguro y bajo medidas de protección y en condiciones limpias.

El equipo, botellas y bloques de botellas portátiles se deben almacenar a cubierto y protegidas de las inclemencias del tiempo, para garantizar que se mantienen limpias hasta su traslado al lugar de utilización dentro de la instalación sanitaria.

### 5.2.2 Continuidad del suministro

**5.2.2.1** (\*) Los sistemas de suministro para los gases medicinales comprimidos y el vacío se deben diseñar para lograr la continuidad del caudal de diseño del sistema a una presión de distribución que cumpla el apartado 7.2 en una condición normal y en condición de primer fallo.

NOTA La pérdida del suministro eléctrico de red o del suministro de agua es una condición de primer fallo. Un fallo en el equipo de control es una condición de primer fallo.

Para lograr este objetivo,

- a) los sistemas de suministro para los gases medicinales comprimidos y el vacío deben estar constituidos al menos por tres fuentes de suministro (es decir, la fuente de suministro primaria, la fuente de suministro secundaria y la fuente de suministro de reserva), y
- b) la disposición y la ubicación de las canalizaciones deben reducir el riesgo de daño mecánico de la canalización hasta un nivel aceptable.

El daño de la canalización se considera un suceso catastrófico y no una condición de primer fallo, y se debería gestionar conforme con el procedimiento de emergencia (véase G.5.3).

**5.2.2.2** El equipo de control se debe diseñar de forma que los componentes se puedan mantener sin interrumpir el suministro de gas/vacío.

**5.2.2.3** Donde la continuidad del suministro no sea un requisito, la aplicación de los procedimientos de gestión del riesgo de acuerdo con la Norma ISO 14791 y en concurrencia con el sistema de gestión del servicio sanitario deben desarrollarse y documentarse por los servicios sanitarios (véase el anexo G).

El fabricante debe proporcionar esta documentación, validada por el servicio sanitario, bajo pedido.

### 5.2.3 Fuente de suministro primaria

La fuente de suministro primaria debe estar conectada de forma permanente y debe ser la fuente de suministro principal de la canalización.

### 5.2.4 Fuente de suministro secundaria

La fuente de suministro secundaria debe estar conectada de forma permanente y debe suministrar el gas automáticamente a la canalización en el caso de que la fuente de suministro primaria sea incapaz de abastecer a la canalización.

### 5.2.5 Fuente(s) de suministro de reserva

La(s) fuente(s) de suministro de reserva debe(n) estar conectada(s) de forma permanente al sistema de distribución canalizada. La activación de la(s) fuente(s) de suministro de reserva en caso de que ambas fuentes de suministro primaria y secundaria estén no disponibles puede ser automática o manual, pero debe garantizar la continuidad del abastecimiento a la canalización.

La activación de la(s) fuente(s) de suministro depende del tipo de componente de las fuentes de suministro:

- a) si todas las fuentes de suministro son con gas en recipientes, botellas o bloques de botellas criogénicos, la activación puede ser manual o automática;
- b) si las fuentes de suministro primarias y secundarias dependen de la red de energía eléctrica, la activación debe ser automática;
- c) si todas las fuentes de suministro dependen de la red de energía eléctrica, la conexión de la(s) fuente(s) de suministro de reserva con la fuente de alimentación eléctrica de emergencia debe ser automática y su activación subsiguiente debe ser automática.

El fabricante junto con la dirección de la instalación sanitaria y basándose en los procedimientos de gestión del riesgo de acuerdo con la Norma ISO 14971, deben determinar:

- a) si es o no aceptable que la(s) fuente(s) de suministro de reserva dependa(n) de una fuente de alimentación eléctrica;

Si una unidad de compresor de aire, una unidad mezcladora o una unidad concentradora de oxígeno se utiliza como una fuente de suministro de reserva, el diseño del sistema de suministro y la fuente de alimentación eléctrica de emergencia debería tener en cuenta el tiempo requerido para que comience el flujo de la(s) fuente(s) de suministro de reserva y que se obtenga la calidad especificada del gas suministrado al sistema de distribución canalizada.

- b) el tamaño de la(s) fuente(s) de suministro de reserva de forma que el caudal de diseño del sistema se pueda abastecer de forma continua cuando no está disponible ninguna de las dos fuentes de suministro primaria y secundaria.
- c) la ubicación de la(s) fuente(s) de suministro de reserva para abastecer el sistema de canalización completo y si optar o no por habilitar más de una única fuente de suministro de reserva;
- d) la ubicación de la(s) fuente(s) de suministro de reserva que debería ser tal que permita el acceso y la utilización de al menos la(s) fuente(s) de suministro de reserva en caso de incendio dentro de la(s) sala(s) que aloja(n) las fuentes de suministro primaria y secundaria;

NOTA Los procedimientos de gestión del riesgo pueden considerar la necesidad de tener ubicaciones separadas para la(s) fuente(s) de suministro de reserva.

- e) si proporcionar o no fuente(s) de suministro de reserva para el aire o nitrógeno motriz para instrumentos quirúrgicos.

### 5.2.6 Medios de descarga de presión

**5.2.6.1** No se requiere ventilación con descarga al exterior para el aire. Para todos los demás gases medicinales comprimidos, la ubicación de los puntos de purga de las válvulas de descarga de presión se debe determinar en colaboración con la dirección de la instalación sanitaria utilizando principios de gestión del riesgo. Si los puntos de descarga están ubicados en el exterior del edificio deben estar provistos de un medio para impedir el ingreso, por ejemplo, de insectos, residuos y agua y alejados de cualquier toma de aire, puerta, ventana u otras aberturas en los edificios. Se deben considerar los efectos potenciales de los vientos imperantes en la ubicación de los puntos de descarga.

**5.2.6.2** Todas las válvulas de descarga de presión deben cerrar automáticamente cuando se ha liberado el exceso de presión.

**5.2.6.3** No debe ser posible aislar un medio de descarga de presión, por ejemplo, mediante una válvula de corte, de la canalización o del regulador de presión u otros componentes a los que esté conectado. Si se incorpora una válvula o un dispositivo limitador del flujo para el mantenimiento, se debe abrir totalmente por la inserción del medio de descarga de presión.

NOTA Se llama la atención sobre las normas regionales, nacionales, e internacionales para las válvulas de descarga de presión, por ejemplo, la Norma ISO 4126-1<sup>[3]</sup>.

**5.2.6.4** Se debe proporcionar un medio para proteger la válvula de descarga de presión contra la manipulación indebida.

**5.2.6.5** Cualquier porción de una canalización dentro de un sistema de suministro en la que pueda quedar atrapado gas en fase líquida entre dos válvulas de corte debe estar provista de un medio para liberar el exceso de presión que resulta de la vaporización del líquido.

**5.2.6.6** Si se quitó una válvula de descarga de presión, por ejemplo, para mantenimiento, la canalización se debe proteger contra la sobrepresión utilizando otro medio de descarga de presión.

**5.2.6.7** Las válvulas de descarga de presión deben cumplir las especificaciones de diseño del fabricante del sistema de suministro, teniendo en cuenta que puede existir reglamentación nacional o regional. El fabricante debe proporcionar evidencia de la conformidad cuando así se solicite.

## **5.2.7 Ensamblado del suministro de mantenimiento**

**5.2.7.1** Excepto para las canalizaciones de vacío y de aire o nitrógeno motriz para instrumentos quirúrgicos, se deben proporcionar uno o más ensamblados del suministro de mantenimiento aguas abajo de la(s) válvula(s) de corte principales.

**5.2.7.2** El fabricante en colaboración con la dirección de la instalación sanitaria debe determinar la ubicación de cada ensamblado del suministro de mantenimiento.

La ubicación de cada ensamblado del suministro de mantenimiento debería ser tal que permita el suministro de gas a la canalización en caso de incendio dentro de la(s) sala(s) de las fuentes de suministro. Los procedimientos de gestión del riesgo deberían ponderar la necesidad de utilizar múltiples ensamblados del suministro de mantenimiento.

Cada ensamblado del suministro de mantenimiento debería estar ubicado fuera de la zona del sistema de suministro y debería permitir el acceso de vehículos.

**5.2.7.3** El ensamblado del suministro de mantenimiento debe tener un conector de entrada selectivo del gas, un medio de descarga de presión, una válvula unidireccional y una válvula de corte. El diseño del ensamblado de suministro debe tener en cuenta el caudal que puede ser necesario durante el mantenimiento. El ensamblado de suministro debe estar físicamente protegido para impedir la manipulación indebida y el acceso no autorizado.

## **5.2.8 Reguladores de presión**

Para los sistemas de distribución canalizada de una sola etapa, los reguladores de presión dentro de los sistemas de suministro deben ser capaces de controlar la presión de la canalización a los niveles que cumplan los requisitos especificados en la tabla 2 del apartado 7.2.1, y en los apartados 7.2.2 y 7.2.3.

## **5.2.9 (\*) Esterilizadores que utilizan ozono**

Los esterilizadores que utilizan ozono no deben estar conectados al sistema de canalización de oxígeno/oxígeno 93 para impedir el reflujos hacia el sistema de canalización de oxígeno/oxígeno 93.

### 5.3 Sistemas de suministro con botellas, bloques de botellas o depósito(s) de alta presión

**5.3.1** Un sistema de suministro con botellas, bloques de botellas o depósito(s) de alta presión debe estar constituido por:

- a) una fuente de suministro primaria que abastezca a la canalización;
- b) una fuente de suministro secundaria que debe abastecer automáticamente a la canalización cuando la fuente de suministro primaria se agota o falla;
- c) una fuente de suministro de reserva (excepto para el aire o nitrógeno motriz para instrumentos quirúrgicos).

Excepto para el aire o nitrógeno motriz para instrumentos quirúrgicos, el sistema de suministro con botellas, bloques de botellas o depósito(s) de alta presión debe ser tal que el caudal de diseño del sistema se pueda suministrar estando dos fuentes de suministro cualesquiera fuera de servicio.

**5.3.2** Las fuentes de suministro primaria y secundaria que abastecen alternativamente a la canalización deben estar constituidas cada una por una batería de botellas, bloques de botellas o depósito(s) de alta presión. Cuando se sustituye una batería de botellas, bloque de botellas o depósito(s) de alta presión agotados, debe ser posible ajustar a cero el dispositivo para el cambio automático. Cada batería debe tener sus botellas, bloques de botellas o depósito(s) de alta presión conectadas a un conector de distribución con su regulador de presión propio. Excepto para el aire, las válvulas de descarga de presión deben descargar al exterior del edificio.

**5.3.3** Excepto para las baterías con solamente una botella, bloque de botellas o depósito(s) de alta presión, se debe instalar una válvula unidireccional en el extremo del conector de distribución de cada conexión flexible entre la botella, bloque de botellas o depósito(s) de alta presión y el conector de distribución.

**5.3.4** (\*) Las conexiones flexibles entre cada botella o bloque de botellas y el conector de distribución deben cumplir la Norma ISO 21969. No se deben utilizar latiguillos no metálicos (recubiertos de material polimérico o reforzados con goma).

**5.3.5** Se debe proporcionar un medio para inmovilizar individualmente todas las botellas ubicadas dentro del sistema de suministro e impedir que se caigan. Las conexiones flexibles entre cada botella y el conector de distribución no se deben utilizar para este fin.

**5.3.6** Todos los sistemas de suministro con botellas deben cumplir el apartado 5.2.2.1.

**5.3.7** Cuando la reserva de oxígeno esté constituida solamente por una botella o bloque de botellas, el conector de distribución debe tener al menos una entrada adicional para poder cambiar la botella o bloque de botellas sin afectar a la continuidad del suministro.

### 5.4 Sistemas de suministro con recipientes criogénicos o no criogénicos

NOTA Puede existir reglamentación regional o nacional aplicable a los recipientes criogénicos y no criogénicos.

**5.4.1** Excepto para el nitrógeno motriz para instrumentos quirúrgicos, un sistema de suministro con recipientes criogénicos o no criogénicos debe estar constituido por uno de los siguientes:

- a) un recipiente criogénico o no criogénico con equipo asociado y dos baterías de botellas o depósito(s) de alta presión;
- b) dos recipientes criogénicos o no criogénicos con equipo asociado y una batería de botellas, bloques de botellas o depósito(s) de alta presión;
- c) tres recipientes criogénicos o no criogénicos con equipo asociado.

El procedimiento de gestión de las fuentes de suministro (véase G.5.8) debería tener en cuenta la vaporización natural del líquido contenido en los recipientes criogénicos y no criogénicos.

**5.4.2** (\*) Cuando materiales que se hacen deleznable a baja temperatura se utilizan aguas abajo del sistema vaporizador, se debe proporcionar un medio para impedir el ingreso de líquido criogénico en el sistema de canalización y se debe iniciar una alarma cuando se active este medio.

**5.4.3** Todos los sistemas de suministro con recipientes criogénicos o no criogénicos móviles o estacionarios deben cumplir el apartado 5.2.2.1.

**5.4.4** Un sistema de suministro con recipientes criogénicos o no criogénicos móviles o estacionarios debe ser tal que el caudal de diseño del sistema se pueda suministrar estando dos cualesquiera fuentes de suministro fuera de servicio.

## **5.5 Sistemas de suministro para aire**

### **5.5.1 Requisitos generales**

**5.5.1.1** Un sistema de suministro de aire para uso médico o aire motriz para instrumentos quirúrgicos debe ser uno de los siguientes o una combinación de los mismos:

- a) un sistema de suministro con botellas, bloques de botellas o depósito(s) de alta presión según se especifica en el apartado 5.3;
- b) un sistema de suministro con un (o más de un) compresor de aire según se especifica en el apartado 5.5.2;
- c) un sistema de suministro con una o más unidades mezcladoras según se especifica en el apartado 5.5.3.

NOTA El aire motriz para instrumentos quirúrgicos se puede suministrar a partir de las mismas fuentes que para el aire para uso médico.

**5.5.1.2** (\*) Si el aire para uso médico o el aire motriz para instrumentos quirúrgicos se suministra para otros fines, tales como la utilización de equipos suspendidos del techo, de sistemas de evacuación de gases anestésicos, de aire respiratorio para el personal médico o para ensayos, se debe proporcionar un medio para impedir el refluo hacia la canalización. El fabricante del sistema debe tener en cuenta los requisitos del caudal de estas aplicaciones.

**5.5.1.3** El aire para uso médico o el aire motriz para instrumentos quirúrgicos no se debe proporcionar para aplicaciones tales como el uso en taller en general, el uso en taller de reparación de motores, pintura por nebulización, inflado de neumáticos, depósitos para presurización de fluidos hidráulicos, sistemas de esterilización y/o control neumático de aire acondicionado. El aire para uso médico o aire motriz para instrumentos quirúrgicos no se debe tampoco proporcionar para ninguna otra aplicación que pueda imponer exigencias imprevistas y que pueda comprometer la disponibilidad y/o la calidad del aire para los fines previstos.

NOTA Tales usos podrían aumentar las interrupciones del servicio, reducir la vida del servicio e introducir contaminación.

**5.5.1.4** Cuando el sistema de suministro de aire para uso médico se requiere para presurizar una cámara hiperbárica, se debe hacer una evaluación para garantizar que existe una capacidad adecuada de la fuente y un tamaño adecuado de los tubos del sistema de canalización para cumplir la demanda total.

NOTA La Norma EN 14930 proporciona información sobre las cámaras hiperbáricas.

**5.5.1.5** Todos los sistemas de suministro para aire deben cumplir el apartado 5.2.2.1. Todas las unidades de compresor y todas las unidades mezcladoras se deben conectar a una fuente de alimentación eléctrica de emergencia.

### **5.5.2 Sistemas de suministro con compresor(es) de aire**

Un compresor utilizado en el sistema de suministro con compresores de aire no se debe utilizar en un sistema de suministro con uno o más concentradores de oxígeno.



**5.5.2.1** (\*) Puede existir reglamentación regional o nacional aplicable al aire para uso médico producido por un sistema de suministro con compresor(es) de aire. Cuando no exista tal reglamentación, el aire para uso médico debe cumplir lo siguiente:

- a) concentración de oxígeno  $\geq 20,4\%$  (fracción en volumen) y  $\leq 21,4\%$  (fracción en volumen);
- b) concentración de aceite total  $\leq 0,1 \text{ mg/m}^3$  medida a la presión ambiente;
- c) concentración de monóxido de carbono  $\leq 5 \text{ ml/m}^3$ ;
- d) concentración de dióxido de carbono  $\leq 500 \text{ ml/m}^3$ ;
- e) contenido de vapor de agua  $\leq 67 \text{ ml/m}^3$ ;
- f) concentración de dióxido de azufre  $\leq 1 \text{ ml/m}^3$ ;
- g) concentración de  $\text{NO} + \text{NO}_2 \leq 2 \text{ ml/m}^3$ .

NOTA 1 El aceite puede estar presente como líquido, aerosol y vapor.

NOTA 2 Estos valores están tomados de la monografía de la farmacopea europea para el "aire medicinal".

**5.5.2.2** (\*) El aire para uso médico o el aire motriz para instrumentos quirúrgicos suministrado por los sistemas compresores se debe filtrar para mantener la contaminación por partículas por debajo de los niveles siguientes:

Número máximo de partículas por metro cúbico en función del tamaño de partícula

Desde  $0,1 \mu\text{m}$  a  $0,5 \mu\text{m}$ :  $< 400\ 000$

Desde  $0,5 \mu\text{m}$  a  $1,0 \mu\text{m}$ :  $< 6\ 000$

Desde  $1,0 \mu\text{m}$  a  $5,0 \mu\text{m}$ :  $< 100$

NOTA Estos valores están tomados de la tabla 2 de la Norma ISO 8573-1:2010.

El fabricante debe proporcionar la evidencia de la conformidad con el apartado 5.5.2.2.

**5.5.2.3** Si no se programa el cambio periódico del(de los) elemento(s) del filtro, se debe proporcionar un medio de verificar el estado de los elementos del filtro.

La conformidad se debe verificar por inspección.

NOTA Pueden existir requisitos regionales o nacionales aplicables a la contaminación por partículas.

**5.5.2.4** (\*) Puede existir reglamentación regional o nacional aplicable al aire motriz para instrumentos quirúrgicos producido por un sistema de suministro con compresor(es) de aire. Cuando no exista tal reglamentación, el aire motriz para instrumentos quirúrgicos debe cumplir lo siguiente:

- a) concentración de aceite total  $\leq 0,1 \text{ mg/m}^3$  medida a la presión atmosférica ambiente;
- b) contenido de vapor de agua  $\leq 67 \text{ ml/m}^3$ .

NOTA 1 El aceite puede estar presente como líquido, aerosol y vapor.

NOTA 2 Es necesario que el aire motriz para instrumentos quirúrgicos tenga un contenido en agua bajo para impedir la formación de agua o hielo (por enfriamiento debido a la expansión adiabática) que puede dañar a los equipos.

Debería considerarse la utilización de tecnologías de compresores que no utilizan aceite para producir aire para uso médico. Véase el anexo I.

**5.5.2.5** Un sistema de suministro con compresor(es) para aire para uso médico debe estar constituido al menos por tres fuentes de suministro, al menos una de las cuales debe ser una unidad de compresor. El sistema de suministro debe ser tal que el caudal de diseño del sistema se pueda suministrar estando dos cualesquiera fuentes de suministro fuera de servicio.

La fuente de suministro debe ser una de las siguientes:

- a) una unidad de compresor;
- b) una batería de botellas, bloque de botellas o depósito(s) de alta presión; o
- c) una unidad mezcladora.

La(s) unidad(es) de compresor debe(n) estar provista(s) de depósito(s) y unidad(es) acondicionadora(s), según se requiera.

Si un sistema de suministro incluye dos o más fuentes de suministro alimentadas desde unidades de compresor, se deben proveer al menos dos unidades acondicionadoras.

Cuando el sistema de suministro de aire para uso médico conste de tres o más unidades de compresor, que se puedan conectar entre las fuentes de suministro diferentes para proporcionar la capacidad adecuada, estas unidades se deben disponer de forma que durante el mantenimiento de cualquier unidad de compresor y durante una condición de primer fallo subsiguiente de cualquier componente del sistema (por ejemplo, del sistema de control), las unidades de compresor restantes y componentes deben ser capaces de suministrar el caudal de diseño del sistema para garantizar la continuidad del suministro.

Cuando el sistema de suministro de aire medicinal conste de más de dos unidades acondicionadoras que se puedan conectar entre las fuentes de suministro diferentes para proporcionar la capacidad adecuada, estas unidades se deben disponer de forma que durante el mantenimiento de cualquier unidad acondicionadora y durante una condición de primer fallo subsiguiente de cualquier componente del sistema (por ejemplo, del sistema de control), la(s) unidad(es) acondicionadora(s) restante(s) y componentes debe(n) ser capaces de suministrar el caudal de diseño del sistema para garantizar la continuidad del suministro de la calidad de producto apropiada.

Cada unidad de compresor debe tener un medio automático para impedir el reflujo a través de unidades fuera de ciclo y una válvula de corte para aislar a la unidad del sistema de canalización y de otros compresores.

Cada unidad de compresor debe estar protegida contra el sobrecalentamiento. Se debe proporcionar un medio para evitar la liberación de productos tóxicos en la canalización en caso de sobrecalentamiento (por ejemplo, interrumpiendo el funcionamiento y aislando al compresor afectado de la canalización).

Se debe instalar al menos un sensor de punto de rocío y un sensor de alarma de CO en el sistema de canalización aguas abajo de todas las unidades acondicionadoras. Se debería proporcionar la capacidad de registro.

NOTA 1 Se pueden monitorizar o registrar otros parámetros de la calidad del aire para uso médico. Puede existir reglamentación regional o nacional pertinente.

NOTA 2 Un sistema de suministro con compresores para aire para uso médico comprende típicamente uno de los siguientes:

- a) una unidad de compresor con un depósito, una unidad acondicionadora y dos baterías de botellas, bloques de botellas o depósito(s) de alta presión;
- b) dos unidades de compresor con dos depósitos, dos unidades acondicionadoras y una batería de botellas, bloques de botellas o depósito(s) de alta presión;

c) tres unidades de compresor con dos depósitos y dos unidades acondicionadoras.

NOTA 3 Una unidad de compresor para aire para uso médico comprende típicamente lo siguiente:

- a) un filtro de entrada;
- b) uno o más compresores;
- c) un postenfriador con válvula de corte y drenaje automático.
- d) un separador de aceite con válvula de corte y drenaje automático para compresores lubricados con aceite;
- e) un sensor de presión para garantizar que el compresor funciona dentro del rango especificado por el fabricante.

NOTA 4 Una unidad acondicionadora para aire para uso médico comprende típicamente lo siguiente:

- a) un secador con válvulas de corte y drenaje automático;
- b) un adsorbedor, un catalizador y filtro(s) según se requiera para eliminar los contaminantes;
- c) un sensor de punto de rocío dotado de una alarma y un visualizador, conectado al sistema de canalización aguas abajo de todas las unidades acondicionadoras.

**5.5.2.6** Si se proporciona un sistema de suministro independiente con compresores de aire motriz para instrumentos quirúrgicos, debe estar constituido al menos por dos fuentes de suministro, al menos una de las cuales debe ser una unidad de compresor.

Se debe instalar al menos un sensor de alarma de punto de rocío en el sistema de canalización aguas abajo de todas las unidades acondicionadoras.

NOTA 1 Un sistema de suministro con compresores de aire motriz para instrumentos quirúrgicos está constituido típicamente por una unidad de compresor con un depósito, una unidad acondicionadora y una batería de botellas, bloques de botellas o depósito de alta presión; o por dos unidades de compresor con uno o más depósitos dotados de un medio de derivación y dos unidades acondicionadoras.

NOTA 2 Una unidad de compresor de aire motriz para instrumentos quirúrgicos está constituida típicamente por un filtro de entrada, uno o más compresores, un postenfriador con válvula de corte y drenaje automático, un separador de aceite con válvula de corte y drenaje automático para compresores lubricados por aceite, y un sensor de presión para garantizar que el compresor funciona dentro del rango especificado por el fabricante.

NOTA 3 Una unidad acondicionadora de aire motriz para instrumentos quirúrgicos está constituida típicamente por un secador con válvulas de corte y drenaje automático, filtro(s) según se requiera(n), un sensor de punto de rocío dotado de una alarma y visualizador, conectado al sistema de canalización aguas abajo de todas las unidades acondicionadoras.

**5.5.2.7** (\*) Los depósitos deben

- a) cumplir la Norma EN 286-1 o las normas nacionales equivalentes, y
- b) estar dotados de válvula(s) de corte, un drenaje automático, un manómetro y una válvula de descarga de presión.

**5.5.2.8** Cada grupo de depósitos se debe disponer para permitir que el mantenimiento de cada depósito en tal grupo se efectúe de forma separada.

NOTA El(los) depósito(s) se puede(n) instalar aguas arriba o aguas abajo de la(s) unidad(es) acondicionador(as).

**5.5.2.9** Si se han instalado dos o más unidades acondicionadoras, deben permitir que el mantenimiento de cada componente se efectúe de forma separada.

**5.5.2.10** Se debe proporcionar una conexión de muestreo con una válvula de corte inmediatamente aguas abajo del(de los) sistema(s) acondicionador(es).

**5.5.2.11** Cuando se proporciona más de una unidad de compresor, cada compresor debe tener un sistema de control dispuesto de forma que la desconexión, o el fallo, de un compresor no afecte al funcionamiento del (de los) otro(s) compresor(es). El sistema de control para compresores múltiples se debe disponer de forma que todas las unidades abastezcan al sistema sucesiva o simultáneamente. Este requisito se debe cumplir en una condición normal y en condición de primer fallo.

Cada depósito o grupo de depósitos debe estar dotado de un medio de control de la presión, por ejemplo, uno o varios interruptores de presión o uno o varios transductores de presión.

Se debe proporcionar un medio para garantizar la continuidad del suministro después de un fallo de cualquier sistema de control (si existe).

**5.5.2.12** La toma de aire ambiente para los compresores debe estar ubicada donde exista una contaminación mínima (por ejemplo, proveniente de la evacuación de motores de combustión interna, del aparcamiento de vehículos, de las zonas de acceso, de los residuos y sistemas de desecho hospitalarios, de la descarga de los sistemas de evacuación de vacío y de humo quirúrgico, de las salidas de ventilación de los sistemas de canalización de gases medicinales o de los sistemas de evacuación de gases anestésicos, de las descargas de sistemas de ventilación, de las salidas de chimeneas).

La entrada debe estar provista de un medio para impedir el ingreso, por ejemplo, de insectos, residuos y agua. Se deberían considerar los efectos potenciales de los vientos imperantes en la zona donde se ubica(n) la(s) toma(s) de entrada que deberían estar alejadas de las salidas de chimeneas.

Cuando más de una fuente de suministro de aire es un compresor de aire, la contaminación de la toma de entrada de aire es un modo de fallo común. El riesgo se debería abordar mediante análisis del riesgo según requiere el apartado 5.2.5.

**5.5.2.13** Un sistema de suministro con compresores previstos para abastecer a un sistema de distribución canalizada de una sola etapa debe incluir dos reguladores de presión conectados de forma permanente. El caudal de diseño del sistema de distribución canalizada debe estar regulado al menos por un regulador de presión aislado para mantenimiento.

Las instrucciones de uso y mantenimiento deben especificar cómo está previsto que funcionen los reguladores de presión conectados de forma permanente.

NOTA El fabricante puede elegir entre diversos medios de control del riesgo, por ejemplo, intercambio automático entre fuentes agotadas y llenas y utilización de alarmas, intercambio manual entre fuentes agotadas y llenas y utilización de procedimientos de emergencia apropiados, capacitación y provisión local de suministros de reserva.

**5.5.2.14** Se debe proporcionar un medio para impedir la transmisión de vibración entre cada compresor y la canalización.

**5.5.2.15** (\*) Si una de las fuentes de suministro incluye uno o más depósitos de alta presión permanentemente conectados, puede rellenarse utilizando un compresor de alta presión abastecido por el sistema de suministro de aire para uso médico.

### **5.5.3 Sistemas de suministro con unidad(es) mezcladora(s)**

**5.5.3.1** Puede existir reglamentación regional o nacional aplicable al aire para uso médico producido por la(s) unidad(es) mezcladora(s). Cuando no exista tal reglamentación, el aire para uso médico producido por la(s) unidad(es) mezcladora(s) debe cumplir lo siguiente:

- a) concentración de oxígeno comprendida entre el 95,0% y 100% del valor nominal que está comprendido entre 21,0% (fracción en volumen) y 22,5% (fracción en volumen)  $\geq$  19,95% (fracción en volumen) y  $\leq$  23,63% (fracción en volumen)];
- b) contenido de vapor de agua  $\leq$  67 ml/m<sup>3</sup>.

NOTA Estos valores están tomados de la monografía de la farmacopea europea sobre "aire medicinal sintético".

**5.5.3.2** Un sistema de suministro con unidad(es) mezcladora(s) debe estar constituido al menos por tres fuentes de suministro, al menos una de las cuales debe ser una unidad mezcladora. El sistema de suministro debe ser tal que el caudal de diseño del sistema se pueda suministrar estando dos cualesquiera fuentes de suministro fuera de servicio.

**5.5.3.3** Un sistema de suministro con unidades mezcladoras consiste en uno de los siguientes:

- a) fuentes de oxígeno y nitrógeno, una unidad mezcladora y dos baterías de botellas, bloques de botellas o depósito(s) de alta presión o unidades de compresor de aire; o
- b) fuentes de oxígeno y nitrógeno, dos unidades mezcladoras y una batería de botellas, bloques de botellas o depósito(s) de alta presión o una unidad de compresor de aire; o
- c) fuentes de oxígeno y nitrógeno, una unidad mezcladora, una unidad de compresor de aire y una batería de botellas, bloques de botellas o depósito(s) de alta presión.

La fuente que suministra oxígeno a la unidad mezcladora no debe ser un sistema de suministro que incluya un concentrador de oxígeno.

**5.5.3.4** Una unidad mezcladora está constituida típicamente por lo siguiente:

- a) una unidad mezcladora conectada a una fuente de suministro de oxígeno y nitrógeno;
- b) una válvula de corte automática controlada por la presión del gas de suministro, un regulador de presión y una válvula unidireccional para cada uno de los gases de suministro;
- c) un analizador de control del proceso instalado entre la unidad mezcladora y el depósito;
- d) un depósito de aire para uso médico dotado de una válvula de descarga de presión, un manómetro y un medio de descarga a la atmósfera;
- e) una válvula de corte automática instalada para impedir que aire para uso médico que no cumple su especificación (véase 5.5.3.1) sea administrado a la salida del sistema de suministro.

**5.5.3.5** Una fuente de suministro de una mezcla de gases según una proporción determinada debe estar constituida al menos por una unidad mezcladora. Cada fuente de suministro de una mezcla de gases debe ser capaz de suministrar el caudal de diseño.

**5.5.3.6** La(s) fuente(s) de oxígeno y nitrógeno para los sistemas mezcladores deben cumplir los requisitos de los apartados 5.2 y 5.4 y pueden ser las mismas fuentes que las que abastecen a las canalizaciones de gas medicinal de forma separada.

La fuente de oxígeno no debe ser un concentrador de oxígeno.

Se debe proporcionar un medio para impedir la contaminación cruzada entre los gases que abastecen a la unidad mezcladora.

**5.5.3.7** Un sistema mezclador debe funcionar automáticamente.

La concentración de oxígeno de la mezcla se debe analizar de forma continua mediante un analizador de oxígeno independiente del que se indica en el punto c) del apartado 5.5.3.4 y debe estar instalado aguas abajo del depósito. Se debe proporcionar la capacidad del registro para la concentración de oxígeno. Cuando el sistema mezclador está constituido por más de una unidad mezcladora, se requiere solamente un sistema analizador de oxígeno independiente.

Si la concentración de oxígeno de la mezcla o la presión suministrada al sistema de distribución canalizada está fuera de especificación, se debe activar una alarma de funcionamiento de emergencia y el sistema mezclador se debe aislar automáticamente cerrando la válvula de corte instalada en la canalización. La fuente de suministro secundaria debe entonces abastecer automáticamente a la canalización.

El sistema debe estar dispuesto de forma que sea necesaria la intervención manual para corregir la composición de la mezcla antes de reconectar el sistema mezclador al sistema de canalización.

Se debe proporcionar un medio para ventilar el depósito de aire para uso médico.

**5.5.3.8** Cada analizador de oxígeno debe garantizar una exactitud de  $\pm 1\%$  del valor medido. La exactitud la debe especificar el fabricante.

NOTA 1 Puede existir reglamentación nacional o regional que regule el analizador de oxígeno.

NOTA 2 Puede ser necesaria la monitorización adicional para demostrar la conformidad del aire para uso médico producido por la(s) unidad(es) mezcladora(s) con la reglamentación nacional o regional.

**5.5.3.9** Un sistema mezclador debe ser capaz de suministrar una mezcla de la composición requerida para el rango completo de caudales especificados.

**5.5.3.10** Un sistema mezclador debe incluir un medio para calibrar el (los) sistema(s) analizador(es) por referencia a una o más mezclas de composición conocida.

**5.5.3.11** Se debe proporcionar una conexión de muestreo con una válvula de corte inmediatamente aguas arriba de la(s) válvula(s) de corte principal(es).

## **5.6 Sistemas de suministro con concentrador(es) de oxígeno**

### **5.6.1 Requisitos generales**

Las unidades de compresor incluidas en sistemas de suministro con concentradores de oxígeno deben estar conectadas a una fuente de alimentación eléctrica de emergencia.

Las unidades de compresor incluidas en sistemas de suministro con concentradores de oxígeno no se deben utilizar como compresores de aire para uso médico.

NOTA Puede existir reglamentación nacional o regional sobre la utilización de oxígeno 93.

Un sistema de suministro con unidad(es) concentrador(as) debe estar constituido al menos por tres fuentes de suministro, al menos una de las cuales debe ser una unidad concentradora. El sistema de suministro debe ser tal que el caudal de diseño del sistema pueda ser suministrado estando dos cualesquiera fuentes de suministro fuera de servicio.

### **5.6.2 Fuente de suministro primaria**

La fuente de suministro primaria debe incluir lo siguiente:

- a) al menos una unidad concentradora de oxígeno;
- b) al menos un depósito de oxígeno 93;
- c) una conexión de muestreo con una válvula de corte inmediatamente aguas abajo del depósito de oxígeno 93;
- d) regulador(es) de presión;
- e) filtro(s) (véase 5.6.5.1);
- f) medio de verificar el estado del(de los) elemento(s) del filtro si no existe programado el cambio periódico de los mismos;
- g) analizador(es) de oxígeno.

La conformidad de la instalación se debe verificar por inspección.

### 5.6.3 Fuente de suministro secundaria

Si la fuente de suministro secundaria consta de un concentrador de oxígeno, debe incluir los mismos componentes que la fuente de suministro primaria. Si la fuente de suministro secundaria está constituida solamente por botellas, bloques de botellas o depósitos de oxígeno 93 de alta presión, se aplican los requisitos siguientes:

- a) la fuente de suministro debe estar constituida al menos por una batería de botellas, bloques de botellas o depósitos de oxígeno 93 de alta presión;
- b) si existe más de una batería de botellas, bloques de botellas o depósitos de oxígeno 93 de alta presión, el gas se debe suministrar a partir de una batería de botellas, bloques de botellas o depósitos de oxígeno 93 de alta presión cada vez y al agotarse una batería, el cambio de la conexión del suministro a otra batería o depósito lleno se debe producir automáticamente.

NOTA Esta configuración es necesaria para facilitar el reabastecimiento de la fuente de suministro secundaria sin interrupción del suministro.

- c) la fuente de suministro secundaria debe estar conectada en paralelo con la fuente de suministro primaria.

La determinación de cómo garantizar la continuidad del suministro se debe hacer en colaboración con la dirección de la instalación sanitaria de acuerdo con procedimientos de gestión del riesgo.

### 5.6.4 Fuente de suministro de reserva

Si la fuente de suministro de reserva está constituida por un concentrador de oxígeno, debe incluir los mismos componentes que la fuente secundaria. Si la fuente de suministro de reserva está constituida solamente por botellas, bloques de botellas o depósitos de oxígeno 93 de alta presión, se aplican los requisitos siguientes:

- a) la fuente de suministro debe incluir al menos una batería de botellas, bloques de botellas o depósitos de oxígeno 93 de alta presión;
- b) si existe más de una batería de botellas, bloques de botellas o depósitos de oxígeno 93 de alta presión, el gas se debe suministrar a partir de una batería de botellas, bloques de botellas o depósitos de oxígeno 93 de alta presión cada vez y al agotarse una batería, el cambio de la conexión del suministro a otra batería o depósito lleno se debe producir automáticamente.

NOTA Esta configuración es necesaria para facilitar el reabastecimiento de la fuente de suministro de reserva sin interrupción del suministro.

- c) la fuente de suministro de reserva se debe conectar aguas abajo de los depósitos de oxígeno 93.

### 5.6.5 Especificaciones para el oxígeno 93

**5.6.5.1** Puede existir reglamentación nacional o regional aplicable al oxígeno 93 producido por un sistema de suministro concentrador de oxígeno. Cuando no exista tal reglamentación, el oxígeno 93, al caudal de diseño del sistema, debe cumplir lo siguiente:

- a) concentración de oxígeno nominal  $(93 \pm 3)\%$  (fracción en volumen);
- b) concentración de monóxido de carbono  $\leq 5 \text{ ml/m}^3$ ;
- c) concentración de dióxido de carbono  $\leq 300 \text{ ml/m}^3$ ;
- d) contenido de aceite  $\leq 0,1 \text{ mg/ m}^3$  medido a temperatura y presión ambiente y corregido a  $0 \text{ }^\circ\text{C}$ ;
- e) contenido de vapor de agua  $\leq 67 \text{ ml/m}^3$ ;
- f) concentración de gases nitrosos  $\text{NO/NO}_2 \leq 2 \text{ ml/m}^3$ ;

g) concentración de dióxido de azufre  $\leq 1 \text{ ml/m}^3$ .

NOTA 1 Estos valores están tomados de la farmacopea europea.

NOTA 2 De acuerdo con las farmacopeas europea y estadounidense norteamericana, el oxígeno 93 es oxígeno cuya fracción en volumen está comprendida entre 90% y 96%, siendo el resto hasta 100% predominantemente argón y nitrógeno.

NOTA 3 La reglamentación nacional o regional puede utilizar otros términos.

**5.6.5.2** El oxígeno 93 se debe filtrar antes de la válvula de corte de la fuente de suministro para mantener la contaminación por partículas inferior al nivel especificado en la tabla 2, clase 2 de la Norma ISO 8573-1:2010 (véase 5.5.2.2).

**5.6.5.3** Si no se programa el cambio periódico del(de los) elemento(s) del filtro, se debe proporcionar un medio de verificar el estado de los elementos del filtro.

La evidencia de la conformidad la debe proporcionar el fabricante.

**5.6.5.4** Cada unidad concentradora incluida en un sistema de suministro debe ser capaz de suministrar un gas producto de la composición requerida para el rango completo de caudales especificados.

## **5.6.6 Unidad concentradora de oxígeno**

**5.6.6.1** Una unidad concentradora de oxígeno consta de lo siguiente:

- a) un suministro de aire comprimido con al menos un compresor de aire;
- b) al menos un lecho filtrante;
- c) válvulas para el intercambio vacío/llevo cuando se agota el suministro;
- d) al menos un sensor de alarma de CO instalado en el sistema de canalización aguas abajo de todas las unidades acondicionadoras.

NOTA Se pueden monitorizar y registrar otros parámetros de la calidad del oxígeno 93. Puede existir reglamentación regional o nacional.

**5.6.6.2** Un compresor de aire puede estar conectado a un depósito de aire.

**5.6.6.3** Un depósito de aire (si existe) puede estar abastecido por más de un compresor.

**5.6.6.4** Los depósitos de aire (si existen) deben:

- a) cumplir la Norma EN 286-1 o las normas nacionales equivalentes;
- b) estar dotados de válvula(s) de corte, un drenaje automático, un manómetro y una válvula de descarga de presión;
- c) estar dotados de un medio de control de la presión, por ejemplo, interruptor(es) de presión o transductor(es) de presión.

La evidencia de la conformidad la debe proporcionar el fabricante cuando así se solicite.

**5.6.6.5** Cuando los gases residuales generados durante la producción de oxígeno 93 se descargan a la atmósfera exterior del edificio, el(los) punto(s) de descarga debe(n) estar dotado(s) de un medio para impedir el ingreso de insectos, residuos y agua de lluvia. Lo(s) punto(s) de descarga debe(n) estar ubicado(s) alejado(s) de cualquier toma de aire, puerta, ventana u otras aberturas en los edificios. Se deben considerar los efectos potenciales de los vientos imperantes en la ubicación de los puntos de descarga.

La evidencia de la conformidad se debe verificar por inspección visual.



### 5.6.7 Depósitos de oxígeno 93

Cada depósito de oxígeno 93 o grupo de depósitos de oxígeno 93 debe:

- a) cumplir las normas internacionales, regionales o nacionales pertinentes;
- b) estar dotados de válvula(s) de corte, un manómetro y una válvula de descarga de presión;
- c) estar dotados de un medio de control de la presión, por ejemplo, interruptor(es) de presión o transductor(es) de presión.
- d) estar dispuestos de forma que el mantenimiento de cada depósito se pueda efectuar por separado.

NOTA El depósito de oxígeno 93 puede estar abastecido por más de un concentrador de oxígeno.

### 5.6.8 Analizadores de oxígeno

**5.6.8.1** El(los) analizador(es) de oxígeno se debe(n) suministrar para medir de forma continua la concentración de oxígeno proveniente de cada fuente de suministro que incorpore un concentrador de oxígeno.

Se debe proporcionar un medio para visualizar y registrar la concentración de oxígeno.

**5.6.8.2** Se debe proporcionar un analizador de oxígeno adicional para permitir la monitorización continua de la concentración de oxígeno del gas producto suministrado al sistema de distribución canalizada.

**5.6.8.3** Se deben proporcionar controles de forma que cada fuente de suministro que incorpore un concentrador de oxígeno deba aislarse automáticamente del sistema si la concentración de oxígeno 93 producido por tal fuente de suministro desciende por debajo de la especificada en el punto a) del apartado 5.6.5, teniendo en cuenta la exactitud de los analizadores.

El analizador de oxígeno y la válvula de aislamiento automática del depósito de oxígeno 93 deben estar ubicados aguas arriba del depósito de oxígeno 93.

**5.6.8.4** Cada analizador de oxígeno debe estar equipado con una alarma de emergencia de concentración baja y una señal de información de concentración alta. El ajuste del(de los) límite(s) de alarma debe tener en cuenta la exactitud de los analizadores. Se debe proporcionar un medio para impedir los cambios no autorizados del ajuste de los límites de alarma.

**5.6.8.5** Cuando lo justifiquen las especificaciones del fabricante del analizador, cada analizador de oxígeno debe incluir una compensación debida a las variaciones de temperatura y presión barométrica para garantizar una exactitud de  $\pm 1\%$ . La exactitud real la debe especificar el fabricante.

NOTA 1 Puede existir reglamentación nacional o regional que especifique los requisitos del analizador de oxígeno.

NOTA 2 Puede ser necesaria monitorización adicional para demostrar la conformidad del oxígeno 93 con la reglamentación nacional o regional.

**5.6.8.6** Se debe proporcionar una conexión de muestreo dotada de una válvula de corte inmediatamente aguas arriba de la válvula de corte del sistema de suministro.

**5.6.8.7** Un sistema de suministro con concentradores de oxígeno debe incluir un medio para calibrar el(los) sistema(s) analizador(es) por referencia a una o más mezclas de composición conocida.

### 5.6.9 Llenado local de depósitos de alta presión permanentemente conectados, que funcionan como fuente de suministro de reserva

**5.6.9.1** Debe procederse con precaución cuando se llenen depósitos de oxígeno 93 de alta presión dado que tal actividad implica riesgos inherentes de incendio debidos a la alta capacidad oxidante sobre los materiales, que a la presión atmosférica ambiente son compatibles con el oxígeno, pero que a presiones más altas pueden entrar en ignición y arder fácilmente en concentraciones altas de oxígeno. Estos riesgos se pueden mitigar por cumplimiento de las normas pertinentes.

**5.6.9.2** Si el oxígeno 93 es comprimido por un compresor elevador de presión en uno o más depósitos de oxígeno 93 de alta presión permanentemente conectados, para utilización como la fuente de suministro de reserva, se deben cumplir los requisitos siguientes:

- a) Se debe proporcionar un medio para garantizar que el llenado del(de los) depósitos de alta presión de reserva no afecta a la administración de oxígeno 93 al sistema de distribución canalizada.
- b) Adyacente al sistema de llenado se debe proporcionar una conexión de muestreo dotada de una válvula de corte.

NOTA Puede existir reglamentación regional o nacional aplicable al sistema de llenado (por ejemplo, la directiva europea de equipos a presión).

**5.6.9.3** Se deben implementar las medidas de seguridad siguientes:

- a) medio (por ejemplo, válvula unidireccional) de garantizar que no se produce refluo hacia el sistema de suministro del concentrador de oxígeno;
- b) barrera(s) apropiada(s) para proteger al personal;
- c) para garantizar la seguridad de los pacientes en caso de una elevación de la temperatura, el compresor elevador de alta presión debe tener un sensor de temperatura en cada etapa de compresión, que pueda activar una alarma cuando se sobrepasen los umbrales de temperatura recomendados por el fabricante del compresor, y pueda detener el compresor;
- d) se deben instalar las alarmas de funcionamiento siguientes, ajustadas para que se activen cuando se alcanzan los umbrales definidos por el fabricante:
  - un sensor de temperatura del recinto;
  - un sensor de temperatura del gas de salida;
  - un sensor de potencia eléctrica;
  - un sensor de alta presión.

Cuando se active una cualquiera de estas alarmas, la unidad de compresor debe detenerse automáticamente para evitar la contaminación de la fuente de suministro de reserva.

- e) se debe proporcionar un medio para ventilar el depósito de oxígeno 93 de alta presión.

## 5.7 Sistemas de suministro para vacío

**5.7.1** Un sistema de suministro para vacío debe estar constituido al menos por tres fuentes de suministro, un receptor, dos filtros bacterianos en paralelo y una trampa de drenaje. Una fuente de suministro incluye típicamente una o más bombas de vacío.

**5.7.2** Un sistema de suministro para vacío debe ser tal que se pueda suministrar el caudal de diseño del sistema estando dos cualesquiera fuentes de suministro fuera de servicio.

**5.7.3** Cuando el sistema de suministro para el vacío consta de más de tres bombas, que se puedan conectar entre las fuentes de suministro diferentes para proporcionar la capacidad adecuada, éstas se deben disponer de forma que durante el mantenimiento de cualquier bomba y durante una condición de primer fallo subsiguiente de cualquier componente del sistema (por ejemplo, del sistema de control), las bombas y los componentes restantes deben ser capaces de suministrar el caudal de diseño del sistema para garantizar la continuidad del suministro.

NOTA Ejemplos típicos de los requisitos del caudal se dan en los documentos HTM 02<sup>[33], [34]</sup>, FD S 90-155<sup>[32]</sup> y en la Norma AS 2896:1998<sup>[22]</sup>.

**5.7.4** Cada bomba debe tener un circuito de control dispuesto de forma que el corte, o el fallo, de una bomba no afecte el funcionamiento de las otras bombas. Los controles se deben disponer de forma que todas las bombas abastezcan al sistema sucesiva o simultáneamente. Este requisito se debe cumplir en una condición normal y en condición de primer fallo del sistema de control.

**5.7.5** Todas las fuentes de suministro deben estar conectadas a la fuente de alimentación eléctrica de emergencia.

**5.7.6** Se debe proporcionar un medio para garantizar el suministro para el vacío correcto al sistema de canalización cuando se interrumpe la energía eléctrica de red durante un periodo determinado por la gestión del riesgo.

**5.7.7** Cada receptor debe estar dotado de válvula(s) de corte para mantenimiento, de una válvula de drenaje y de un manómetro de vacío. Si solamente existe un receptor o una trampa de drenaje, se debe proporcionar un medio de derivación. Los receptores deben cumplir las normas regionales o nacionales apropiadas.

**5.7.8** El (los) punto(s) de descarga de evacuación de las bombas de vacío se debe(n) canalizar al exterior y debe(n) estar provistas de un medio para impedir el ingreso, por ejemplo, de insectos, residuos y agua. El(los) punto(s) de descarga debe(n) estar ubicado(s) alejado(s) de cualquier toma de aire, puerta, ventana u otras aberturas en los edificios. Se deben considerar los efectos potenciales de los vientos imperantes en la ubicación de los puntos de descarga de evacuación.

**5.7.9** La línea de evacuación debe estar provista de un drenaje en su punto más bajo.

**5.7.10** Si es necesario, se debe proporcionar un medio para impedir la transmisión de vibración desde las bombas de vacío a la canalización.

NOTA 1 Puede existir reglamentación nacional o regional aplicable al ruido.

**5.7.11** La clasificación de cada filtro bacteriano debe ser HEPA ISO 35H o mejor de acuerdo con la Norma ISO 29463-1 y debe ser capaz de ser atravesado por el caudal de diseño del sistema en condiciones normales de funcionamiento.

**5.7.12** La capacidad de filtración total debe garantizar que el caudal de diseño del sistema se mantenga en condiciones normales de funcionamiento cuando al menos un filtro bacteriano está aislado durante el mantenimiento, por ejemplo, sustitución del cartucho del filtro.

**5.7.13** (\*) Los sistemas de suministro para el vacío que cumplen esta parte de la Norma ISO 7396 no se deben utilizar como dispositivos motrices de un sistema de evacuación de gases anestésicos (SEGA) (véase la Norma ISO 7396-2<sup>[8]</sup>).

**5.7.14** Los sistemas de suministro para el vacío que cumplen esta parte de la Norma ISO 7396 no se deben utilizar en odontología.

**5.7.15** Los sistemas de suministro para el vacío deben cumplir el apartado 5.2.2.1.

## **5.8 Ubicación de los sistemas de suministro**

La ubicación de un sistema de suministro la debería definir la dirección de la instalación sanitaria en colaboración con el proveedor del sistema, utilizando los principios de gestión del riesgo.

**5.8.1** Los sistemas de suministro en botellas de gas y gas en estado líquido no deben estar ubicados:

- a) en la misma sala que el equipo accionado por motores alimentados por energía eléctrica (por ejemplo, compresores de aire, bombas de vacío, bombas de agua). Se puede hacer una excepción para el equipo (por ejemplo, ventiladores, sopladores) que proporcionan ventilación directa al recinto y para entornos abiertos al exterior sin riesgo de confinamiento;

b) en la misma sala que el equipo con llamas desnudas (por ejemplo, calderas, calentadores de agua que queman gas).

NOTA La reglamentación nacional o regional puede requerir que los compresores de aire, los concentradores de oxígeno y los sistemas de suministro para el vacío estén ubicados en zonas técnicas separadas.

**5.8.2 (\*)** La ubicación de los sistemas de suministro debe tener en cuenta los peligros potenciales (por ejemplo, la contaminación y los incendios) que se produzcan donde se sitúen otros equipos u otros sistemas de suministro dentro de la misma sala. El lugar de ubicación debe disponer de un medio de detección de incendio.

Se deben proporcionar instalaciones de drenaje para la(s) unidad(es) de compresor y la(s) bomba(s) de vacío.

La temperatura ambiente en las salas para sistemas de suministro se debe mantener comprendida entre 10 °C y 40 °C.

Los sistemas de suministro instalados en espacios abiertos necesitan ser adecuados para las condiciones ambientales a las que estarán expuestos.

Los locales de los sistemas de suministro que contienen gases que no sean aire para uso médico y en los que se pueda acumular el gas deben estar dotadas de un monitor de oxígeno con un indicador a la entrada que advierta de la presencia de concentraciones de oxígeno inferiores a 19,5% o superiores a 23,5%. El monitor debe activar una alarma con una señal sonora y visual a la entrada, que advierta de la presencia de concentraciones de oxígeno inferiores a 19,5% o superiores a 23,5%.

NOTA 1 La reglamentación nacional o regional puede requerir la monitorización de otros gases, por ejemplo, CO<sub>2</sub> y N<sub>2</sub>O.

NOTA 2 Puede existir reglamentación nacional y regional que regule los niveles de ruido. El equipo mecánico (por ejemplo, compresores y bombas) puede generar ruido superior a 70 dBA.

## 5.9 Ubicación de los conectores de distribución de las botellas

La ubicación de los conectores de distribución de las botellas se debe definir en colaboración con las autoridades pertinentes y debe ser conforme con las normas nacionales pertinentes. Las recomendaciones informativas se dan en el anexo B.

## 5.10 Ubicación de los recipientes criogénicos estacionarios

La ubicación de los recipientes criogénicos estacionarios se debe definir en colaboración con las autoridades pertinentes y con el proveedor del gas y debe ser conforme con las normas nacionales pertinentes. Las recomendaciones informativas se dan en el anexo B.

# 6 Sistemas de monitorización y alarma

## 6.1 Generalidades

Los sistemas de monitorización y alarma tienen cuatro propósitos diferentes que cumplen las alarmas de funcionamiento, las alarmas de funcionamiento de emergencia, las alarmas clínicas de emergencia y las señales de información.

- a) Las alarmas de funcionamiento notifican al personal técnico que una o más fuentes de suministro dentro de un sistema de suministro ya no están disponibles para su uso y que es esencial que se emprenda una acción.
- b) Las alarmas de funcionamiento de emergencia indican una presión anormal dentro de una canalización y podrían requerir una respuesta inmediata del personal técnico.
- c) Las alarmas clínicas de emergencia indican una presión anormal dentro de una canalización y podrían requerir una respuesta inmediata tanto del personal técnico como del personal clínico.
- d) Las señales de información indican cualquier estado del sistema, exceptuando las alarmas y las señales recordatorias.

El panel de control, la monitorización y el sistema de alarma se deben diseñar de acuerdo con la Norma IEC 60601-1-8. Excepto si se utiliza un tono único o la alternancia entre dos tonos como una señal sonora, la alarma clínica de emergencia puede eximirse de cumplir los requisitos de alarma sonora de la Norma IEC 60601-1-8 (véase tabla 1).

## 6.2 Requisitos de la instalación

**6.2.1** Si no se especifica en esta parte de la Norma ISO 7396, la ubicación de los paneles indicadores se debe determinar en colaboración con la dirección de la instalación sanitaria utilizando los principios de gestión del riesgo.

**6.2.2** Los sistemas de monitorización y alarma deben cumplir los requisitos siguientes:

- a) el diseño y la ubicación de los paneles indicadores deben permitir la observación continua;
- b) un panel indicador que muestre todas las señales de alarma de funcionamiento especificadas en el apartado 6.4 se debe instalar en al menos un lugar que permita la observación o comunicación continua;
- c) el (los) panel(es) indicador(es) para las señales de alarma clínica de emergencia especificadas en el apartado 6.5 se debe(n) instalar en las zonas clínicas y de cuidados intensivos. Un panel adicional indicando la zona monitorizada se puede instalar cerca de la válvula de corte de la zona;
- d) un panel indicador que muestre todas las señales de alarma de funcionamiento de emergencia especificadas en el apartado 6.6 se debe instalar en la ubicación de la(s) fuente(s) de suministro;
- e) se deben proporcionar indicadores visuales para cada condición monitorizada y se deben marcar según su función;
- f) los dispositivos sensores para las alarmas clínicas de emergencia enumeradas en el apartado 6.5 se deben situar en el lado del paciente de la válvula de corte de cada zona;
- g) se debe proporcionar un medio para ensayar el mecanismo de activación y el funcionamiento de las señales de alarma visuales y sonoras;
- h) no debe ser posible aislar un dispositivo sensor de la presión, por ejemplo, mediante una válvula de corte operada manualmente, mientras está conectado a la canalización. Si se incorpora una válvula para fines de mantenimiento, se debe abrir al insertar el dispositivo sensor;
- i) la tolerancia de funcionamiento en el punto de ajuste de cualquier dispositivo sensor de la presión no debe ser superior al  $\pm 4\%$ .

**6.2.3** (\*) Los sistemas de monitorización y alarma se deben conectar a las fuentes de alimentación eléctrica tanto normales como de emergencia y deben estar protegidos eléctricamente de forma individual. Se debe efectuar la determinación del riesgo para determinar si es aconsejable la utilización de sistemas de alimentación ininterrumpida (SAI).

**6.2.4** Los sistemas de alarma se deben diseñar de forma que se inicie una alarma si existe un fallo eléctrico entre el sensor y el indicador.

## 6.3 Señales de monitorización y alarma

### 6.3.1 Generalidades

Las categorías y las características de las señales de monitorización y alarma deben cumplir la tabla 1.

### 6.3.2 Señales sonoras

**6.3.2.1** Todas las demás señales sonoras deben utilizar uno o dos tonos modulados igualmente, por ejemplo, con una frecuencia de 4 Hz entre dos tonos de 440 Hz y 880 Hz. El nivel de presión sonora ponderado A de los componentes acústicos de estas señales de alarma a volumen mínimo debe ser al menos 2 dB por encima de un nivel de fondo blanco de 55 dB cuando se ensaya conforme con la Norma ISO 3746.

**6.3.2.2** Si el operador puede aplicar una pausa de audio a una señal de alarma sonora, la pausa de audio no debe impedir que la señal sonora sea activada por una condición de alarma nueva.

**6.3.2.3** (\*) Si el operador puede aplicar una pausa de audio a una señal de alarma sonora de emergencia, el periodo de pausa de audio no debe ser superior a 15 min.

**6.3.2.4** Si se proporciona un medio para permitir la interrupción de la señal sonora, tal medio debe ser accesible sólo a personas autorizadas.

### 6.3.3 Señales visuales

**6.3.3.1** Los colores indicadores y las características de las señales visuales deben cumplir la tabla 1.

**6.3.3.2** Las indicaciones visuales se deben percibir correctamente y se deben poder diferenciar entre sí en las condiciones siguientes (véase la Norma IEC 60601-1-8):

- a) operador con una agudeza visual de 1 (corregida si es necesario);
- b) campo de observación a una distancia de 4 m y en cualquier punto dentro de la base de un cono subtendido por un ángulo de 30° con el eje perpendicular al centro del plano de observación de la indicación visual;
- c) bajo una iluminancia ambiente comprendida en el intervalo de 100 lx a 1 500 lx.

### 6.3.4 Características de las alarmas de emergencia y de funcionamiento

**6.3.4.1** Para las alarmas clínicas de emergencia y las alarmas de funcionamiento de emergencia (véase la tabla 1), debe existir una señal visual y una señal sonora simultánea.

**6.3.4.2** Para las alarmas de funcionamiento (véase la tabla 1), debe existir al menos una señal visual.

**6.3.4.3** Cuando ha cesado la condición que ha causado la alarma, la señal sonora y la señal visual se deben reiniciar automáticamente o por la acción deliberada del operador.

Tabla 1 – Categorías de las alarmas y características de la señal

| Categoría                              | Respuesta del operador                                  | Color del indicador           | Señal visual                  | Señal sonora                               |
|----------------------------------------|---------------------------------------------------------|-------------------------------|-------------------------------|--------------------------------------------|
| Alarma clínica de emergencia           | Respuesta inmediata para tratar una situación peligrosa | Cumple la Norma IEC 60601-1-8 | Cumple la Norma IEC 60601-1-8 | Cumple la Norma IEC 60601-1-8 <sup>a</sup> |
| Alarma de funcionamiento de emergencia | Respuesta inmediata para tratar una situación peligrosa | Rojo                          | Parpadeante <sup>b</sup>      | Si                                         |
| Alarma de funcionamiento               | Respuesta pronta a una situación peligrosa              | Amarillo                      | Parpadeante <sup>b</sup>      | Opcional                                   |
| Señal de información                   | Constatación del estado normal                          | No rojo<br>No amarillo        | Constante                     | No                                         |

<sup>a</sup> Si se utiliza un patrón de más de dos tonos o frecuencias.

<sup>b</sup> Las frecuencias de parpadeo de la señal visual para las alarmas de funcionamiento y las alarmas de funcionamiento de emergencia deberían estar comprendidas entre 0,4 Hz y 2,8 Hz con un ciclo de trabajo entre 20% y 60%.

### 6.3.5 Señales de información

Las señales de información se deben proporcionar para indicar el estado normal y deben consistir en una señal visual (véase la tabla 1).

### 6.3.6 Ampliaciones de la alarma a puntos distantes

Si se proporciona una ampliación de la alarma a puntos distantes, se debe disponer de forma que un fallo en el circuito externo no afecte el funcionamiento correcto de la alarma principal (véase la tabla 1).

## 6.4 Provisión de alarmas de funcionamiento

Las señales de alarma de funcionamiento se deben proporcionar para indicar lo siguiente:

- el recambio de primarias a secundarias de las fuentes de suministro de botellas;
- cualquier fuente de suministro primaria, secundaria o de reserva de botellas por debajo de la presión o contenido mínimo;

NOTA Para las botellas de óxido nítrico y dióxido de carbono, la presión podría no indicar el contenido.

- la presión en cualquier recipiente criogénico por debajo de la mínima especificada por la dirección de la instalación sanitaria en colaboración con el proveedor del gas;
- el nivel del líquido en cualquier recipiente criogénico por debajo del mínimo especificado por la dirección de la instalación sanitaria en colaboración con el proveedor del gas;
- el funcionamiento defectuoso de un sistema compresor de aire;

NOTA El umbral de la alarma por sobrecalentamiento del compresor lo define el fabricante del compresor.

- para el aire suministrado por un sistema compresor, el contenido de vapor de agua por encima del nivel especificado en el apartado 5.5.2.1 o 5.5.2.4;

- g) para el aire para uso médico suministrado desde un sistema compresor y el oxígeno 93 suministrado desde un sistema concentrador, cuando el nivel de CO sobrepasa 10 ppm o un límite inferior cuando la reglamentación regional o local especifiquen un valor inferior.

El valor especificado en la monografía sobre el aire para uso médico de la Farmacopea Europea es 5 ppm V/V (fracción en volumen). El valor límite especificado en la monografía sobre el aire para uso médico de la Farmacopea Estadounidense Norteamericana es 0,001% V/V (10 ppm V/V). En zonas en las que existan presentes niveles altos intermitentes de CO atmosférico (por ejemplo, cerca de una autopista muy transitada), las instalaciones sanitarias deberían considerar instalar un sistema de tratamiento para eliminar el CO del suministro de aire comprimido para uso médico.

Para reducir las alarmas espurias transitorias se optó por el valor de 10 ppm (V/V) basándose en la experiencia norteamericana con estos monitores.

La reglamentación regional o nacional puede requerir la utilización de alarmas de funcionamiento adicionales, por ejemplo, para el aire suministrado por un sistema compresor u oxígeno 93 suministrado por un sistema concentrador.

NOTA Esto podría incluir, por ejemplo, la monitorización de la concentración de O<sub>2</sub>, CO, CO<sub>2</sub>, NO, NO<sub>2</sub> y aceite.

- h) el funcionamiento defectuoso de un sistema mezclador;
- i) el funcionamiento defectuoso de un sistema criogénico;
- j) el funcionamiento defectuoso de un sistema de vacío;
- k) el funcionamiento defectuoso de un sistema de suministro de oxígeno 93;
- l) el funcionamiento defectuoso de un sistema con un concentrador de oxígeno;
- m) una fuente de suministro de reserva en uso;
- n) contenido de la fuente de suministro de reserva por debajo del 50% de su capacidad para gas(es) comprimido(s) en botellas (por ejemplo, oxígeno, aire, nitrógeno) o menos de una presión de 40 bar para gas(es) en estado líquido en botellas (por ejemplo, óxido nitroso y dióxido de carbono);
- o) fallo de la fuente de alimentación eléctrica externa.

## 6.5 Provisión de alarmas clínicas de emergencia

Las señales de alarma clínica de emergencia se deben proporcionar para indicar lo siguiente:

- a) la desviación de la presión de la canalización aguas abajo de cualquier válvula de corte de zona, superior al  $\pm 20\%$  de la presión de distribución nominal;
- b) un aumento de la presión de la canalización para el vacío aguas arriba de cualquier válvula de corte de zona, superior a 66 kPa absolutos.

## 6.6 (\*) Provisión de alarmas de funcionamiento de emergencia

Las señales de alarma de funcionamiento de emergencia se deben proporcionar para indicar lo siguiente:

- a) para un sistema de distribución de una sola etapa, una desviación de la presión de la canalización aguas abajo de la válvula de corte principal, superior al 20% de la presión de distribución nominal;
- b) para un sistema de distribución de doble etapa, una desviación de la presión de la canalización aguas abajo de la válvula de corte principal, superior al 20% de la presión nominal del sistema de suministro;



- c) un aumento de la presión de la canalización para el vacío en el lado del paciente de la válvula de corte principal, superior a 44 kPa absolutos.

NOTA La reglamentación/normas regionales o nacionales pueden requerir un valor diferente para la alarma de vacío.

- d) temperatura de cualquier compresor de aire que sobrepase el umbral definido por el fabricante;
- e) aire para uso médico suministrado desde un sistema compresor, cuando el nivel de CO sobrepasa 25 ppm o un valor inferior si así lo requiere la reglamentación regional o nacional;

NOTA El valor de ajuste de 25 ppm se seleccionó igual al valor límite umbral para CO especificado por la American Conference of Governmental Industrial Hygienists (ACGIH). La reglamentación local o regional puede establecer otros valores.

- f) para sistemas abastecidos a partir de unidades de suministro concentradoras de oxígeno, una concentración de oxígeno inferior a 90%;
- g) para sistemas abastecidos a partir de unidades mezcladoras, una concentración de oxígeno fuera de los límites especificados.

La ubicación de los sensores de presión debería ser coherente con la ubicación y el uso previsto de las válvulas de corte de anillo, si existen instaladas.

## 7 Sistemas de distribución canalizada

### 7.1 Resistencia mecánica

Todas las secciones de los sistemas de distribución canalizada para los gases medicinales comprimidos deben resistir una presión de 1,2 veces la presión máxima que se pueda aplicar a tal sección en condición de primer fallo.

### 7.2 Presión de distribución

NOTA A menos que se especifique lo contrario, las presiones en esta parte de la Norma ISO 7396 se expresan como presión manométrica (es decir, la presión atmosférica se define como 0).

**7.2.1** La presión de distribución normal debe estar dentro de los límites dados en la tabla 2. Gases diferentes se pueden suministrar a presiones de distribución nominales diferentes en la misma instalación sanitaria.

**Tabla 2 – Límites de la presión de distribución nominal**

| Presión en kilopascales                                                                                                              |                                  |
|--------------------------------------------------------------------------------------------------------------------------------------|----------------------------------|
| Gases medicinales comprimidos diferentes del aire o nitrógeno motriz para instrumentos quirúrgicos                                   | $400^{+100}_0$                   |
| Aire o nitrógeno motriz para instrumentos quirúrgicos                                                                                | $800^{+200}_{-100}$ <sup>a</sup> |
| Vacío                                                                                                                                | $< 60$ <sup>b</sup>              |
| <sup>a</sup> La reglamentación/normas regionales o nacionales pueden requerir un límite diferente.<br><sup>b</sup> Presión absoluta. |                                  |

Si los gases se suministran a presiones de distribución nominales diferentes, el óxido nitroso se debería suministrar a una presión de distribución nominal inferior a la correspondiente para el oxígeno y el aire para uso médico para impedir el flujo de óxido nitroso al interior de la canalización para oxígeno o aire para uso médico cuando se utilizan mezcladores de gases u otro equipo.

Si los gases se suministran a presiones de distribución nominales diferentes, el aire para uso médico se puede suministrar a una presión de distribución nominal inferior o superior a la correspondiente para el oxígeno. Se debería efectuar un análisis del riesgo para determinar los ajustes de la presión apropiados.

NOTA Puede ser aplicable la reglamentación nacional o regional.

**7.2.2** Para los gases medicinales comprimidos diferentes del aire o nitrógeno motriz para instrumentos quirúrgicos, la presión en cualquier unidad terminal no debe ser mayor del 110% de la presión de distribución nominal con el sistema funcionando a flujo cero. La presión en cualquier unidad terminal no debe ser inferior al 90% de la presión de distribución nominal con el sistema funcionando al caudal de diseño del sistema.

NOTA 1 El caudal de diseño del sistema se calcula de acuerdo con los factores de diversificación apropiados. Ejemplos de los factores de diversificación se dan en los documentos HTM 02 <sup>[33],[34]</sup>, FD S 90-155 <sup>[32]</sup> y AS 2896-1998 <sup>[22]</sup>.

NOTA 2 Los factores siguientes contribuirán al cambio de presión: prestaciones de los reguladores de presión, descenso de presión en la canalización aguas abajo del regulador de presión y descenso de presión a través de la unidad terminal.

**7.2.3** Para el aire o nitrógeno motriz para instrumentos quirúrgicos, la presión en cualquier unidad terminal no debe ser superior al 115% de la presión de distribución nominal con el sistema funcionando a caudal cero. La presión en cualquier unidad terminal no debe ser inferior al 85% de la presión de distribución nominal con el sistema funcionando al caudal de diseño del sistema.

NOTA 1 El caudal de diseño del sistema se calcula de acuerdo con los factores de diversificación apropiados. Ejemplos de los factores de diversificación se dan en los documentos HTM 02 <sup>[33],[34]</sup>, FD S 90-155 <sup>[32]</sup> y AS 2896-1998 <sup>[22]</sup>.

NOTA 2 Los factores siguientes contribuirán al cambio de presión: prestaciones de los reguladores de presión de la línea, descenso de presión en la canalización aguas abajo del regulador de presión de la línea y descenso de presión a través de la unidad terminal.

**7.2.4** Para los sistemas de vacío, la presión en cualquier unidad terminal no debe ser superior a 60 kPa absolutos con el sistema funcionando al caudal de diseño del sistema.

NOTA El caudal de diseño del sistema se calcula conforme con los factores de diversificación apropiados. Ejemplos de los factores de diversificación se dan en los documentos HTM 02 <sup>[33],[34]</sup>, FD S 90-155 <sup>[32]</sup> y AS 2896-1998 <sup>[22]</sup>.

**7.2.5** (\*) Para los gases medicinales comprimidos diferentes al aire o nitrógeno motriz para instrumentos quirúrgicos, la presión en cualquier unidad terminal no debe ser superior a 1 000 kPa en una condición de primer fallo de cualquier regulador de presión instalado dentro del sistema. Se debe proporcionar un medio para este fin (por ejemplo, válvulas de descarga de presión). Si existen instaladas, las válvulas de descarga de presión deben cumplir el apartado 5.2.6. Los discos de ruptura no se deben utilizar para este fin.

El fabricante debe proporcionar la evidencia de la conformidad.

NOTA 1 La reglamentación regional o nacional puede requerir la provisión de la evidencia a un organismo notificado o autoridad competente si así lo solicitan.

NOTA 2 Se llama la atención sobre las normas regionales, nacionales e internacionales para las válvulas de descarga de presión, por ejemplo, la Norma ISO 4126-1<sup>[3]</sup>.

**7.2.6** (\*) Para el aire o nitrógeno motriz para instrumentos quirúrgicos, la presión en cualquier unidad terminal no debe ser superior a

2 000 kPa en una condición de primer fallo de cualquier regulador de presión instalado dentro del sistema. Se deben dotar los medios para este fin (por ejemplo, válvulas de descarga de presión). Si existen instaladas, las válvulas de descarga de presión deben cumplir el apartado 5.2.6. Los discos de ruptura no se deben utilizar para este fin.

El fabricante debe proporcionar la evidencia de la conformidad.

NOTA 1 La reglamentación regional o nacional puede requerir la provisión de la evidencia a un organismo notificado o autoridad competente si así lo solicitan.

NOTA 2 Se llama la atención sobre las normas regionales, nacionales e internacionales para las válvulas de descarga de presión, por ejemplo, la Norma ISO 4126-1<sup>[3]</sup>.

### 7.3 Ensamblados de latiguillos de baja presión y conexiones flexibles de baja presión

**7.3.1** Si una conexión flexible no está prevista para ser sustituida durante la vida útil del sistema de canalización y forma parte la canalización (por ejemplo, cuando se utiliza para aislamiento de la vibración, aislamiento sísmico, movimiento del edificio y movimiento relativo de las canalizaciones) se deben cumplir los requisitos siguientes:

- a) la conexión flexible de baja presión debe ser metálica;
- b) la conexión flexible de baja presión no requiere ser selectiva del gas;
- c) los materiales utilizados para los componentes deben cumplir los requisitos del apartado 4.3;
- d) la conexión flexible de baja presión se debe ensayar como parte de la tubería permanente.

**7.3.2** Si una conexión flexible de baja presión se utiliza para conectar partes en movimiento de equipo fijo a una canalización, [por ejemplo, como parte de equipo fijo permanente tal como brazos de extensión, equipo suspendido del techo, rieles en el techo o para aislar eléctricamente unidades terminales instaladas cerca de sistemas de obtención de imágenes por resonancia magnética nuclear (MRI)], debe cumplir lo siguiente:

- a) debe cumplir la Norma ISO 5359;
- b) se debe ensayar de acuerdo con el capítulo 12;
- c) debe ser accesible para inspección y mantenimiento (véase también 8.1.2).

La utilización de ensamblados de latiguillos de baja presión y conexiones flexibles de baja presión en el sistema de distribución canalizada debería estar limitada debido al peligro potencial derivado de su rotura y el riesgo subsiguiente de la pérdida del suministro de gas.

### 7.4 Sistemas de distribución canalizada de doble etapa

**7.4.1** (\*) Las disposiciones alternativas para los reguladores de presión de la línea se muestran en el anexo A (véanse las figuras A.23 y A.24). Cada espacio de cama/espacio de paciente se debe abastecer desde al menos dos reguladores de presión de la línea instalados de forma permanente para garantizar la continuidad del suministro. Cada regulador de presión de la línea debe suministrar el caudal de diseño de la zona servida. La presión de entrada del regulador de presión de la línea no debe ser superior a 3 000 kPa (véase la Norma ISO 10524-2).

NOTA 1 Los reguladores de presión de la línea se pueden combinar con la válvula de corte de zona, (véase 8.3).

Las instrucciones de uso y mantenimiento deben especificar cómo está previsto que funcionen los dos reguladores de presión de la línea conectados de forma permanente.

NOTA 2 El fabricante puede escoger entre diversos medios de control del riesgo, por ejemplo, utilizar recambio automático y alarmas, recambio manual y procedimientos de emergencia apropiados, capacitación y proporcionar suministros de reserva locales.

Para garantizar la continuidad del suministro, los dos reguladores de presión de la línea no se deberían utilizar al mismo tiempo. Si se utilizasen al mismo tiempo podrían fallar ambos.

**7.4.2** Para los propósitos de emergencia y mantenimiento, las válvulas de corte se deben instalar tanto aguas arriba como aguas abajo, adyacentes a cada regulador de presión de la línea.

## 8 Válvulas de corte

### 8.1 Generalidades

**8.1.1** Las válvulas de corte se proporcionan para aislar las secciones del sistema de distribución canalizada para el mantenimiento, la reparación, las ampliaciones futuras planificadas y para facilitar el ensayo periódico.

La nomenclatura para las válvulas de corte debe ser la siguiente:

- a) válvula de corte de fuente;
- b) válvula de corte principal;
- c) válvula de corte de ascendente;
- d) válvula de corte de rama;
- e) válvula de corte de zona;
- f) válvula de corte de anillo;
- g) válvula de corte para mantenimiento;
- h) válvula de corte de entrada.

NOTA Ejemplos de la nomenclatura de las válvulas de corte se dan en el anexo A.

**8.1.2** Si no se especifica, el fabricante en colaboración con la dirección de la instalación sanitaria deben determinar la ubicación de todas las válvulas de corte y el alcance de la zona servida por cada válvula de corte de zona, utilizando los procedimientos de análisis del riesgo de acuerdo con la Norma ISO 14971.

La determinación de los riesgos debe también tener en cuenta los peligros que se originan de la rotura posible de los ensamblados de latiguillos de baja presión instalados dentro de las unidades de suministro médico.

Se debería considerar la provisión de una válvula de corte en el punto donde la canalización entra al edificio a menos que la válvula de corte principal, de ascendente o de la rama esté accesible dentro del edificio.

**8.1.3** Se deben identificar todas las válvulas de corte indicando

- a) el nombre o símbolo del servicio de gas o vacío, o
- b) los ascendentes, las ramas o las zonas controladas.

Esta identificación se debe fijar de forma segura a la válvula, caja de válvulas o a la canalización y debe ser fácilmente visible en el lugar donde está instalada la válvula.

**8.1.4** Para todas las válvulas de corte en un sistema de canalización de gases medicinales, debe estar claro por observación si la válvula está abierta o cerrada.

**8.1.5** Se debe proporcionar una válvula de corte de fuente aguas abajo (aguas arriba para el vacío) de cada fuente de suministro.

**8.1.6** Se debe proporcionar una válvula de corte de entrada en la canalización inmediatamente aguas arriba del ensamblado de suministro de mantenimiento, si existe instalado.

**8.1.7** Las válvulas de corte deben poder ser enclavables en las posiciones abierta y cerrada o se deben proteger contra su utilización por personal no autorizado.

## **8.2 Válvulas de corte de servicio**

### **8.2.1 Los usos típicos de las válvulas de corte de servicio son**

- a) como válvulas de corte de ascendentes;
- b) como válvulas de corte de ramas;
- c) como válvulas de corte para mantenimiento; o
- d) como válvulas de corte de anillo.

**8.2.2** Solamente el personal autorizado debe utilizar las válvulas de corte de servicio y no deberían ser accesibles a personas no autorizadas.

**8.2.3** Cada ascendente debe estar dotado de una válvula de corte adyacente a la conexión con la línea principal.

**8.2.4** Cada rama debe estar dotada de una válvula de corte adyacente a la conexión con el ascendente o con la línea principal.

## **8.3 Válvulas de corte de zona**

**8.3.1** Todas las unidades terminales en el sistema de canalización que no sean aquéllas provistas sólo para emergencia, para fines de ensayo del sistema o para mantenimiento de componentes (por ejemplo, los reguladores de presión de la línea) deben estar en el lado del paciente de una válvula de corte de zona (aguas arriba para el vacío). Se debe proporcionar una válvula de corte de zona en cada canalización de gas y de vacío que sirva a cada quirófano, zona departamental general y a todos los otros departamentos, por ejemplo, unidad de cuidados intensivos (UCI), unidad de cuidados intensivos para neonatos (UCIN) y zona de tratamientos de urgencia.

**8.3.2** Las válvulas de corte de zona se deben ubicar en el mismo piso que las unidades terminales sobre las que actúan.

**8.3.3** Las válvulas de corte de zona se deben utilizar para aislar las zonas dentro de las instalaciones sanitarias con fines de mantenimiento y de emergencia. Su utilización, en el último caso, se debería incluir como parte del plan de catástrofes de emergencia.

**8.3.4** Las válvulas de corte de zona se deben alojar en cajas con cubiertas o puertas. Las cajas se deben etiquetar con las palabras siguientes o similares:

Para gases comprimidos:

**PRECAUCIÓN – Válvulas de gases medicinales para (descripción de la zona controlada) No cerrar la(s) válvula(s) excepto en caso de emergencia.**

Para el vacío:

**PRECAUCIÓN – Válvulas de vacío para (descripción de la zona controlada) No cerrar la(s) válvula(s) excepto en caso de emergencia.**

**8.3.5** Cada caja debe contener lo siguiente:

- a) la(s) válvula(s) de corte de zona para uno o más gases;
- b) excepto para los sistemas de vacío, medios para permitir el aislamiento físico del (de los) servicio(s). Estos medios deben estar claramente visibles cuando se despliegan. Una válvula cerrada no se debe considerar un aislamiento físico adecuado cuando se efectúan modificaciones de los sistemas existentes.

**8.3.6** La ventilación de cada caja debe salir a la sala para impedir la acumulación de gas y debe tener una cubierta o puerta que se pueda garantizar en la posición cerrada. La cubierta o puerta debe permitir el acceso rápido en caso de emergencia.

**8.3.7** Todas las cajas deben ser visibles y accesibles en todo momento.

Se debe considerar impedir el acceso al personal no autorizado, especialmente en las unidades siquiátricas o pediátricas.

**8.3.8** Excepto para las canalizaciones de vacío y para aire o nitrógeno motriz para instrumentos quirúrgicos, se debe proporcionar un punto de entrada de emergencia y mantenimiento aguas abajo de cada válvula de corte de zona. El punto de entrada de emergencia y mantenimiento debe ser selectivo del gas (ya sea un cuerpo NIST, DISS o SIS o la toma de una unidad terminal). Las dimensiones del punto de entrada deben tener en cuenta el caudal requerido durante las actividades de emergencia y mantenimiento. El punto de entrada de emergencia y mantenimiento puede estar situado dentro de la caja que contiene la válvula de corte de zona.

**8.3.9** Ningún componente se debe instalar entre una válvula de corte de zona y la unidad terminal excepto para:

- los sensores o indicadores (por ejemplo, para la presión y el caudal),
- los puntos de entrada de emergencia y mantenimiento,
- los medios para permitir el aislamiento físico del servicio,
- las válvulas de corte para mantenimiento (si existen instaladas),
- los reguladores de baja presión ajustables por el operador para aire o nitrógeno motriz para instrumentos quirúrgicos (véase la Norma ISO 10524-4 <sup>[19]</sup>),
- ensamblados de latiguillos de baja presión que cumplan la Norma ISO 5359 dentro de las unidades de suministro médico.

**8.3.10** No se debe instalar ninguna válvula de corte de zona aguas abajo del sensor que activa la alarma de presión de emergencia.

## **9 Unidades terminales, conectores selectivos del gas, unidades de suministro médico, reguladores de presión y manómetros**

**9.1** Las unidades terminales deben cumplir la Norma ISO 9170-1.

**9.2** Los conectores selectivos del gas deben ser o el punto de conexión selectivo del gas de una unidad terminal que cumpla la Norma ISO 9170-1 o el cuerpo de un conector NIST, DISS o SIS.

**9.3** Las unidades de suministro médico (por ejemplo, equipo suspendido del techo, las unidades médicas de cabecera, los brazos de extensión) deben cumplir la Norma ISO 11197.

**9.4** Los conectores de distribución y los reguladores de presión de la línea deben cumplir la Norma ISO 10524-2.

**9.5** Los manómetros deben cumplir los requisitos dados en la Norma ISO 10524-2.

## **10 Marcado y código de color**

### **10.1 Marcado**

**10.1.1** Las canalizaciones se deben marcar de acuerdo con el apartado 10.1.2 con el nombre y/o el símbolo del gas adyacente a las válvulas de corte, en las uniones y cambios de dirección, antes y después de las paredes y tabiques, etc., a intervalos de no más de 10 m y adyacente a las unidades terminales.

NOTA 1 Ejemplos típicos de los métodos de marcado son las etiquetas metálicas, el estarcido, el troquelado y los marcadores adhesivos.

NOTA 2 Para la identificación de las válvulas de corte, véase el apartado 8.1.3.

**10.1.2** El marcado debe

- a) cumplir la Norma ISO 5359;
- b) utilizar letras de no menos de 6 mm de altura;
- c) ser aplicado con el nombre y/o el símbolo del gas a lo largo del eje longitudinal de la canalización; y
- d) incluir flechas que denoten la dirección del flujo.

NOTA 1 Para tuberías dispuestas circularmente, la dirección del flujo puede ser cualquiera según lo indiquen las flechas en el sentido correspondiente.

NOTA 2 Puede existir reglamentación regional o nacional aplicable al marcado de los sistemas de canalización y sus componentes.

### **10.2 Código de color**

Si se utiliza un código de color para las canalizaciones, debe cumplir la Norma ISO 5359.

NOTA 1 La Norma ISO 5359:2014 no incluye marcado ni código de color para el oxígeno 93.

NOTA 2 Puede existir reglamentación regional o nacional aplicable al código de color de los sistemas de canalización y sus componentes.

## **11 Instalación de la canalización**

### **11.1 Generalidades**

**11.1.1** Todas las actividades en esta sección deben ser efectuadas por un instalador sujeto a un proceso de gestión de la calidad incluida la capacitación impartida en la instalación sobre sistemas de gases medicinales de acuerdo con normas aplicables.

NOTA Ejemplos incluyen las Normas ISO 13485<sup>[20]</sup>, ISO 9001<sup>[17]</sup>, ASSE 6000<sup>[49]</sup>, *Medical Gas Piping and Systems Personnel Certification Program* de la CSA, CSA B-51<sup>[50]</sup> o equivalentes.

**11.1.2** Los componentes de la canalización que puedan entrar en contacto con el gas particular deben cumplir los requisitos de limpieza de las Normas EN 13348 e ISO 15001 según proceda (véase 4.3.6 y 4.3.7) y suministrarse protegidos de la contaminación antes y durante su instalación.

**11.1.3** Las unidades terminales para los gases medicinales y el vacío deben estar ubicadas solamente en zonas previstas para la conexión de productos sanitarios. No se debe hacer ninguna conexión a un sistema de canalización para otros usos. Los usos permitidos del aire para uso médico y aire motriz para instrumentos quirúrgicos relacionados con el cuidado del paciente se dan en el apartado 5.5.1.2. Los usos no permitidos del aire para uso médico y aire motriz para instrumentos quirúrgicos se dan en el apartado 5.5.1.3.

**11.1.4** Las canalizaciones y los servicios eléctricos deben ya sea

- a) discurrir en compartimientos separados, o
- b) estar separados por más de 50 mm.

NOTA Puede existir reglamentación regional o nacional aplicable a las instalaciones eléctricas en edificios.

**11.1.5** La canalización debe estar conectada a una terminal de tierra equipotencial lo más cerca posible del punto de entrada al edificio de la canalización. Las propias canalizaciones no se deben utilizar para conectar a tierra el equipo eléctrico.

NOTA Puede existir reglamentación regional o nacional aplicable a la continuidad de la conexión a tierra equipotencial de todas las uniones dentro del mismo edificio y al aislamiento eléctrico mutuo de edificios diferentes.

**11.1.6** Las canalizaciones se deben proteger del daño físico, por ejemplo, del daño que se puede originar del movimiento de equipo portátil tal como estantes sobre ruedas, camillas y carros, en los pasillos y en otros lugares.

**11.1.7** Las canalizaciones no protegidas no se deben instalar en zonas de peligro especial, por ejemplo, en zonas donde se almacenen materiales inflamables. Cuando sea inevitable la instalación de canalizaciones en tales lugares, la canalización se debe instalar en un recinto que impida la liberación de gas medicinal dentro de la zona en caso de ocurrir una fuga.

NOTA Puede existir reglamentación regional o nacional aplicable a los requisitos de construcción y de prevención de incendios.

**11.1.8** Si las canalizaciones se colocan enterradas, se deben colocar en túneles o conductos. El túnel o el conducto debe estar provisto de drenaje adecuado para impedir la acumulación de agua. Si las canalizaciones se colocan solas en un túnel o conducto, con otros servicios o con canalizaciones para otros fluidos o gases, el peligro potencial que surge de esta ubicación se debe evaluar utilizando los procedimientos de análisis del riesgo de acuerdo con la Norma ISO 14971. La determinación de los riesgos debe tener en cuenta que una fuga que no se detecta (por ejemplo, por una alarma o inspección periódica) se debe considerar una condición normal y no una condición de primer fallo. El trazado de los tubos enterrados se debería indicar en el sitio utilizando medios apropiados, por ejemplo, mediante cinta de marcar continua sobre la canalización aproximadamente a la mitad de la profundidad de enterramiento.

**11.1.9** Las canalizaciones no se deben instalar en los huecos de ascensores.

**11.1.10** Una válvula de corte no se debe instalar donde una fuga es probable que cause una acumulación de gas, por ejemplo, en una cavidad sellada.

**11.1.11** Se debe minimizar el daño debido al contacto con materiales corrosivos, por ejemplo, mediante el uso de materiales no metálicos impermeables aplicados a la superficie exterior de los tubos en la zona donde puede ocurrir el contacto.

**11.1.12** Se debe proporcionar un medio que permita la expansión y la contracción de las canalizaciones.

**11.1.13** Todas las canalizaciones para los gases medicinales se deben trazar de forma que no discurran expuestas a una temperatura inferior a 5 °C por encima del punto de rocío del gas a la presión de la canalización.

NOTA Se llama la atención sobre la posibilidad de una restricción del flujo debida a la exposición de la canalización de vacío a alta o baja temperatura.



## 11.2 Soportes de la canalización

**11.2.1** Las canalizaciones deben descansar sobre soportes a intervalos para impedir que se comben o sufran distorsión. Los intervalos máximos entre los soportes para tubos metálicos y no metálicos no deberían ser superiores a los valores dados en la tabla 3.

NOTA Puede existir reglamentación regional o nacional que especifique los intervalos entre los soportes.

**11.2.2** Los soportes deben garantizar que la canalización no se puede desplazar accidentalmente de su posición.

**11.2.3** Los soportes deben ser de material resistente a la corrosión, o se deben tratar para impedir la corrosión. Se debe proporcionar algún medio para impedir la corrosión electrolítica entre los tubos y las superficies de contacto de los soportes.

**11.2.4** Cuando las canalizaciones cruzan cables eléctricos, las canalizaciones deben tener soportes adyacentes a los cables.

**11.2.5** Las canalizaciones no se deben utilizar como soporte ni servir de soporte para otras canalizaciones o conductos.

**Tabla 3 – Intervalos mínimos entre soportes para los tubos**

| <b>Diámetro exterior del tubo</b><br>mm | <b>Intervalo máximo entre soportes</b><br>m |
|-----------------------------------------|---------------------------------------------|
| ≤ 20                                    | 1,5                                         |
| > 20 a 28                               | 2,0                                         |
| > 28 a 54                               | 2,5                                         |
| > 54                                    | 3,0                                         |

## 11.3 Uniones de la canalización

**11.3.1** Excepto para las uniones mecánicas utilizadas para determinados componentes, todas las uniones de la canalización metálica se deben soldar con bronce o con soldadura por fusión. Si se utiliza metal de aporte, su temperatura líquida no debe ser inferior a 600 °C. El metal de aporte debe estar nominalmente exento de cadmio. Si se utilizan aleaciones de plata, deben cumplir la Norma ISO 17672.

NOTA Se pueden utilizar las uniones mecánicas (por ejemplo, conexiones con brida o roscadas) para conectar a la canalización componentes tales como válvulas de corte, unidades terminales, reguladores de presión, controles y sensores de monitorización y alarma.

**11.3.2** Durante la soldadura con bronce o por fusión de los empalmes de la canalización, el interior de la canalización se debe purgar continuamente con gas protector.

NOTA La Norma EN 13585:2012 <sup>[29]</sup> especifica los requisitos para el proceso de soldadura con bronce, las condiciones de ensayo, la evaluación y el certificado. La Norma EN 13134 <sup>[51]</sup> especifica las reglas generales (procedimientos de ensayo, probetas) para la especificación y aprobación de los procedimientos de soldadura con bronce para todos los materiales.

**11.3.3** Si se utilizan acoplamientos para unir tuberías de cobre, deben cumplir las Normas EN 1254-1 y EN 1254-4.

## 11.4 Ampliaciones y modificaciones de sistemas de canalización existentes

**11.4.1** Los componentes utilizados en las ampliaciones y modificación de un sistema de canalización existente deben cumplir los requisitos pertinentes de esta parte de la Norma ISO 7396.

**11.4.2** La conexión final de las ampliaciones a cada sistema se debe efectuar solamente de forma sucesiva, para minimizar el riesgo de conexiones cruzadas. Todos los demás sistemas deben permanecer a la presión de distribución nominal. Se debe considerar cuidadosamente la ubicación de esta conexión para minimizar los problemas de acceso durante la instalación y el ensayo.

**11.4.3** Si se ha de hacer una ampliación en un sistema existente aguas arriba (aguas abajo para el vacío) de una válvula de corte de zona, se debe añadir una válvula de corte al punto de conexión si una válvula ya existente no se puede utilizar para tal fin.

**11.4.4** Cuando un sistema existente no cumple el requisito especificado en el apartado 12.6.10, se debe instalar un filtro doble con válvulas de aislamiento en el punto de conexión para cumplir el requisito especificado en el apartado 12.6.10.

**11.4.5** Todas las unidades terminales en una ampliación se deben etiquetar temporalmente para indicar que no se han de utilizar.

**11.4.6** La conexión al sistema existente se debe hacer solamente después de haber completado con éxito los ensayos apropiados de la modificación especificados en el capítulo 12. La válvula de corte especificada en el apartado 11.4.3 se debe abrir entonces y se deben completar los ensayos pertinentes adicionales de la modificación.

**11.4.7** Cuando se hace una conexión a un sistema existente que está en uso, tal conexión se debe hacer en un único punto de conexión soldado con bronce que se pueda ensayar para detectar fugas a la presión de distribución nominal utilizando fluido de detección de fugas.

**11.4.8** Cuando la modificación se ha completado y ensayado de acuerdo con el capítulo 12, se deben eliminar todas las etiquetas especificadas en el apartado 11.4.5.

**11.4.9** La ampliación de un sistema existente se debe separar del sistema de canalización existente durante la instalación y el ensayo de presión. Una válvula de corte única entre los dos sistemas no se considera que es una separación segura.

**11.4.10** Cuando la válvula de corte especificada en el apartado 11.4.3 se abre para efectuar los ensayos pertinentes adicionales en la modificación, todo el sistema de canalización ampliado y modificado debe estar a presión atmosférica. El gas de ensayo en la modificación se debe expulsar corriente abajo para impedir una contaminación por reflujos de la canalización existente antes de abrir la válvula de corte especificada en el apartado 11.4.3.

## **12 Ensayos y puesta en servicio**

### **12.1 Generalidades**

El fabricante debe efectuar y documentar los ensayos después de que se ha completado la instalación.

NOTA Puede existir reglamentación regional o nacional que requiera que el fabricante tenga un sistema de la calidad aprobado.

El fabricante debería efectuar todos los ensayos bajo la supervisión de la Persona Autorizada de la instalación sanitaria.

Un ejemplo de un procedimiento para los ensayos y la puesta en servicio se da en el anexo C.

### **12.2 Requisitos generales para los ensayos**

En esta parte de la Norma ISO 7396, los requisitos para el caudal y el volumen del gas administrado se expresan en condiciones normales de presión y temperatura.

**12.2.1** Excepto para aquellos ensayos en los que se especifica el gas a utilizar, el purgado y los ensayos descritos en el apartado 12.4 se deben efectuar con aire para uso médico o el gas específico.

NOTA El aire para uso médico se puede utilizar para las canalizaciones de oxígeno, óxido nitroso, mezcla de oxígeno/óxido nitroso, aire 93 y aire.

**12.2.2** Antes de efectuar ningún ensayo de acuerdo con el apartado 12.4, se debe etiquetar cada unidad terminal en un sistema objeto del ensayo para indicar que el sistema se está ensayando y que la unidad terminal no se debe utilizar.

**12.2.3** La resolución y la exactitud de todos los dispositivos de medición utilizados para el ensayo deben ser apropiadas para los valores a medir.

**12.2.4** Todos los dispositivos de medición utilizados para la certificación se deben calibrar a intervalos apropiados.

**12.2.5** Para las ampliaciones y modificaciones de los sistemas de distribución canalizada existentes, no se necesitan efectuar todos los ensayos enumerados en los apartados 12.3 y 12.4. El fabricante debe especificar y documentar cuáles ensayos se deben efectuar.

**12.2.6** Cuando los resultados de un ensayo no cumplen los criterios de éxito del mismo, se debe efectuar trabajo correctivo y se deben repetir los ensayos previos según sea necesario.

### **12.3 Inspecciones y comprobaciones antes de la ocultación**

Se deben efectuar las inspecciones y comprobaciones siguientes:

- a) inspecciones del marcado y de los soportes de la canalización (véase 12.5.1);
- b) comprobaciones de conformidad con las especificaciones del diseño (véase 12.5.2).

NOTA Algunos ensayos de fugas y de integridad mecánica se pueden efectuar también antes de la ocultación (véase 12.6.1).

### **12.4 Ensayos, comprobaciones y procedimientos antes de utilizar el sistema**

Los ensayos y procedimientos siguientes se deben efectuar en cualquier orden:

- a) ensayos de fugas y de integridad mecánica (véase 12.6.1);
- b) ensayos de fugas y de cierre de las válvulas de corte de zona y comprobaciones de la zonificación correcta y de la identificación correcta (véase 12.6.2);
- c) ensayo de conexión cruzada (véase 12.6.3);
- d) ensayo de obstrucción y de flujo (véase 12.6.4);
- e) comprobaciones de las unidades terminales y de los conectores NIST, DISS o SIS para verificar el funcionamiento mecánico, la especificidad del gas y la identificación (véase 12.6.5);
- f) ensayos o comprobaciones de las prestaciones del sistema (véase 12.6.6);
- g) ensayos de las válvulas de descarga de presión (véase 12.6.7);
- h) ensayos de todas las fuentes de suministro (véase 12.6.8);
- i) ensayos de los sistemas de monitorización y alarma (véase 12.6.9);
- j) ensayo de la contaminación por partículas de los sistemas de distribución canalizada (véase 12.6.10);

- k) ensayos de la calidad del aire para uso médico producido por los sistemas de suministro con compresores de aire (véase 12.6.11);
- l) ensayo de la calidad del aire motriz para instrumentos quirúrgicos producido por el (los) compresor(es) de aire (véase 12.6.12);
- m) ensayo de la calidad del aire para uso médico producido por las unidades mezcladoras (véase 12.6.13);
- n) ensayo de la calidad del oxígeno 93 producido por la(s) unidad(es) concentradora(s) (véase 12.6.14);
- o) llenado con el gas específico (véase 12.6.15);
- p) ensayos de la identidad del gas (véase 12.6.16).

## **12.5 Requisitos para las inspecciones y comprobaciones antes de la ocultación**

### **12.5.1 Inspección del marcado y de los soportes de la canalización**

El marcado debe cumplir el apartado 10.1. Los soportes de la canalización se deben inspeccionar para verificar que cumplen el apartado 11.2.

### **12.5.2 Comprobación de la conformidad con las especificaciones del diseño**

Todos los elementos deben demostrar que cumplen las especificaciones del diseño (por ejemplo, las dimensiones de las canalizaciones, la ubicación de las unidades terminales, los reguladores de presión de las líneas, si existen instalados, y las válvulas de corte).

## **12.6 Requisitos para los ensayos, comprobaciones y procedimientos antes de la utilización del sistema**

### **12.6.1 Generalidades**

Se debe efectuar una de las combinaciones siguientes de los ensayos de fugas y de integridad mecánica:

- a) ensayo de integridad mecánica de los sistemas de canalización del vacío (véase 12.6.1.1) + ensayo de pérdida de vacío en los sistemas de canalización del vacío (véase 12.6.1.2) + ensayos combinados de fugas y de integridad mecánica de los sistemas de canalización de gases medicinales comprimidos (después de la ocultación) (véase 12.6.1.6);
- b) ensayo de integridad mecánica de los sistemas de canalización del vacío (véase 12.6.1.1) + ensayo de pérdida de vacío en los sistemas de canalización del vacío (véase 12.6.1.2) + ensayo de integridad mecánica de los sistemas de gases medicinales comprimidos (véase 12.6.1.3) + ensayo de fugas de los sistemas de canalización de gases medicinales comprimidos (véase 12.6.1.4);
- c) ensayo de integridad mecánica de los sistemas de canalización del vacío (véase 12.6.1.1) + ensayo de pérdida de vacío en los sistemas de canalización del vacío (véase 12.6.1.2) + ensayos combinados de fugas y de integridad mecánica de los sistemas de canalización de gases medicinales comprimidos (antes de la ocultación) (véase 12.6.1.5) + ensayo de fugas de los sistemas de canalización de gases medicinales comprimidos (véase 12.6.1.4);
- d) ensayo combinado de fugas y de integridad mecánica de los sistemas de canalización del vacío (véase 12.6.1.7).

NOTA Puede existir reglamentación regional o nacional aplicable a los requisitos para las fugas y la integridad mecánica.

#### **12.6.1.1 Ensayo de integridad mecánica de los sistemas de canalización del vacío**

Este ensayo se puede efectuar antes de la ocultación o después de la ocultación y antes de la utilización del sistema. Puede ser preferible ensayar las secciones del sistema individualmente, siempre que no se omita ninguna sección.

Se aplica una presión 500 kPa durante 5 min.

La fuente del gas de ensayo se debe desconectar después de la presurización inicial. Se verifica la integridad del sistema de distribución canalizada y de sus componentes.

#### **12.6.1.2 Ensayo de pérdida de vacío en el sistema de canalización del vacío**

Este ensayo se debe efectuar después de la ocultación y antes de la utilización del sistema.

Con el sistema completo a la presión de distribución nominal, con la fuente de suministro aislada y con todas las demás válvulas abiertas, el aumento de presión en la canalización no debe ser superior a 20 kPa después de 1 h.

#### **12.6.1.3 Ensayo de integridad mecánica para los sistemas de canalización de gases medicinales comprimidos**

Este ensayo se debe efectuar antes de la ocultación.

Se aplica durante 5 min una presión de no menos de 1,2 veces la presión máxima que podría ocurrir en condición de primer fallo en cada sección del sistema de distribución canalizada.

Para los sistemas de distribución de doble etapa, los reguladores de presión de la línea no se deberían instalar en esta etapa de la instalación y se pueden sustituir por conectores adecuados. Si es así, se debería determinar la presión de ensayo para la canalización completa, teniendo en cuenta la presión máxima que se puede aplicar a la canalización aguas abajo del sistema de suministro en condición de primer fallo.

Se comprueba la integridad del sistema de distribución canalizada y de sus componentes.

#### **12.6.1.4 Ensayo de fugas de los sistemas de canalización de gases medicinales comprimidos**

Este ensayo se debe efectuar después de la ocultación y antes de la utilización del sistema.

Para los sistemas de distribución canalizada de una sola etapa, la fuga del sistema de canalización del gas medicinal se debe medir desde toda(s) la(s) porción(es) del sistema aguas abajo y aguas arriba de cada válvula de corte de zona con la fuente del gas de ensayo desconectada.

Para los sistemas de distribución de doble etapa, la fuga del sistema de canalización del gas medicinal se debe medir desde toda(s) la(s) porción(es) del sistema aguas abajo y aguas arriba de cada regulador de presión de la línea con la fuente del gas de ensayo desconectada.

Se deben utilizar los medios para permitir el aislamiento físico de los servicios descritos en el punto b) del apartado 8.3.5 para aislar las secciones aguas arriba y aguas abajo de cada válvula de corte de zona (o de cada regulador de presión de la línea).

En las secciones aguas abajo de cada válvula de corte de zona (o de cada regulador de presión de la línea):

- después de un periodo de ensayo de 2 h a 24 h a la presión de distribución nominal, el descenso de presión no debe ser superior a 0,4%/h de la presión de ensayo en las porciones que no incluyen latiguillos flexibles en las unidades de suministro médico;
- después de un periodo de ensayo de 2 h a 24 h a la presión de distribución nominal, el descenso de presión no debe ser superior a 0,6%/h de la presión de ensayo en las porciones que incluyen latiguillos flexibles en las unidades de suministro médico.

En las secciones aguas arriba de cada válvula de corte de zona (o de cada regulador de presión de la línea):

- después de un periodo de ensayo de 2 h a 24 h a la presión de distribución nominal para los sistemas de distribución canalizada de una sola etapa o a la presión nominal del sistema de suministro para los sistemas de distribución canalizada de doble etapa, el descenso de presión no debe ser superior a 0,025% de la presión de ensayo inicial por hora.

#### **12.6.1.5 Ensayos combinados de fugas y de integridad mecánica de los sistemas de canalización de gases medicinales comprimidos (antes de la ocultación)**

Estos ensayos se deben efectuar antes de la ocultación.

Se aplica durante 5 min una presión de no menos de 1,2 veces la presión máxima que podría ocurrir en condición de primer fallo en cada sección del sistema de distribución canalizada.

Se comprueba la integridad del sistema de distribución canalizada y de sus componentes.

Para los sistemas de distribución de doble etapa, los reguladores de presión de la línea no se deberían instalar en esta etapa de la instalación y se pueden sustituir por conectores adecuados. Si es así, se debería determinar la presión de ensayo para la canalización completa, teniendo en cuenta la presión máxima que se puede aplicar a la canalización aguas abajo del sistema de suministro en condición de primer fallo.

A la misma presión de ensayo, el descenso de presión después de un periodo de ensayo de 2 h a 24 h debe ser inferior a 0,025% de la presión de ensayo inicial por hora.

#### **12.6.1.6 Ensayos combinados de fugas y de integridad mecánica de los sistemas de canalización de gases medicinales comprimidos (después de la ocultación)**

Estos ensayos se deben efectuar después de la ocultación y antes de la utilización del sistema.

La integridad mecánica se debe ensayar durante 5 min a una presión de no menos de 1,2 veces la presión máxima que podría ocurrir en condición de primer fallo de cada sección del sistema de distribución canalizada.

Se comprueba la integridad mecánica del sistema de distribución canalizada y de sus componentes.

La fuga se debe medir entonces desde el sistema completo con la fuente del gas de ensayo desconectada de acuerdo con el apartado 12.6.1.4.

#### **12.6.1.7 Ensayo combinado de fugas y de integridad mecánica de los sistemas de canalización del vacío**

Estos ensayos se deben efectuar antes de la ocultación. Puede ser preferible ensayar secciones del sistema individualmente, siempre que no se omita ninguna sección. Durante 5 min se aplica una presión de 500 kPa. La fuente del gas de ensayo se debe desconectar después de la presurización inicial. Se comprueba la integridad del sistema de distribución canalizada y de sus componentes. A la misma presión de ensayo, el descenso de presión después de un periodo de ensayo de 2 h a 24 h debe ser inferior a 0,025% de la presión de ensayo inicial por hora.

#### **12.6.1.8 Correcciones de temperatura**

Si es necesario, el descenso de presión se debe corregir para tener en cuenta las variaciones debidas a la temperatura de la canalización, de acuerdo con las leyes de los gases ideales (véase la información en el anexo E).

#### **12.6.2 (\*) Ensayos de fugas y de cierre de las válvulas de corte de zona y verificación de la zonificación correcta y la identificación correcta**

**12.6.2.1** El sistema aguas arriba de cada válvula de corte de zona cerrada objeto del ensayo se mantiene a la presión de distribución nominal, y manteniendo la línea aguas abajo despresurizada a 100 kPa y todas las unidades terminales aguas abajo cerradas, el aumento de presión aguas abajo de cada válvula de corte de zona cerrada después de 15 min no debe ser superior a 5 kPa.

Este ensayo no es aplicable a los sistemas de vacío.

**12.6.2.2** Se debe verificar que el funcionamiento y la identificación de todas las válvulas de corte de zona es correcto y se debe demostrar que controlan solamente aquellas unidades terminales previstas por el diseño.

### 12.6.3 Ensayo de conexión cruzada

Se debe demostrar que no existe ninguna conexión cruzada entre las canalizaciones para servicios de gases diferentes o servicios de vacío.

#### 12.6.3.1 Generalidades

Todos los sistemas de canalización deben estar a presión atmosférica y todas las válvulas de corte de zona abiertas. Se debe conectar una fuente de gas de ensayo a solamente un sistema de canalización a la vez.

Se debe presurizar solamente una canalización a la vez durante este ensayo.

Aquel sistema de canalización que está siendo objeto del ensayo se debe mantener a la presión de distribución nominal durante el ensayo. En el caso del sistema de canalización del vacío, se debe utilizar el sistema de suministro de vacío.

En el caso de una canalización dispuesta circularmente todas las válvulas del bucle se deben verificar antes del ensayo para garantizar que están abiertas. Este ensayo se debe aplicar a todas las unidades terminales.

#### 16.6.3.2 Procedimiento

**12.6.3.2.1** Se presuriza (o evacua) el sistema de canalización a ensayar a la presión de distribución nominal.

**12.6.3.2.2** Se verifica que el gas fluye a través de cada unidad terminal del sistema de canalización objeto del ensayo.

**12.6.3.2.3** Se verifica que no existe flujo de gas saliente de ninguna unidad terminal de ningún otro sistema de canalización cuando se abre con un cabezal selectivo del gas y que por tanto, no existe ninguna conexión cruzada.

**12.6.3.2.4** Estando todos los demás sistemas de canalización a presión atmosférica, se repite el procedimiento desde el apartado 12.6.3.2.1 al apartado 12.6.3.2.3 verificando sucesivamente cada sistema de canalización, incluido el vacío, preferiblemente en una sesión de ensayo.

**12.6.3.2.5** Se repite el ensayo completo si se hace cualquier modificación en los sistemas de canalización durante el procedimiento de puesta en servicio.

**12.6.3.2.6** Los resultados del ensayo se deben documentar (por ejemplo, utilizando el impreso D8). En el apartado C.3.3 se muestran otros métodos de verificar la ausencia de conexiones cruzadas.

### 12.6.4 Ensayo de obstrucción y flujo

El cambio de presión medido en cada unidad terminal no debe ser superior a los valores especificados en la tabla 4 cuando se toma el caudal de ensayo especificado en la tabla 4 de cada unidad terminal o de cada conector NIST, DISS o SIS sucesivamente. Cada sistema de canalización debe estar a su presión de distribución nominal y conectado al suministro del gas de ensayo.

**Tabla 4 – Cambio de presión máximo permisible**

| Sistema de canalización                                                                                                                                                          | Cambio de presión              | Caudal de ensayo |
|----------------------------------------------------------------------------------------------------------------------------------------------------------------------------------|--------------------------------|------------------|
| Gases medicinales comprimidos que no sean aire o nitrógeno motriz para instrumentos quirúrgicos                                                                                  | $\leq 10\%$                    | 40 l/min         |
| Aire o nitrógeno motriz para instrumentos quirúrgicos                                                                                                                            | $\leq 15\%$                    | 350 l/min        |
| Conducto de evacuación para aire o nitrógeno motriz para instrumentos quirúrgicos                                                                                                | $\leq 40$ kPa (contrapresión)  | 350 l/min        |
| Vacío                                                                                                                                                                            | $< 60$ kPa de presión absoluta | 25 l/min         |
| NOTA Durante este ensayo, la presión de distribución en el sistema de vacío está sujeta al cambio, por tanto, es apropiado utilizar un valor absoluto para el cambio de presión. |                                |                  |

Se debe verificar la ausencia de obstrucción de todos los conductos de evacuación (por ejemplo, de las válvulas de descarga de presión, de las unidades terminales para suministro y desecho de aire o nitrógeno motriz para instrumentos quirúrgicos).

### **12.6.5 Comprobaciones del funcionamiento mecánico, selectividad del gas e identificación de las unidades terminales y de los conectores NIST, DISS o SIS**

#### **12.6.5.1 Funcionamiento mecánico**

Este ensayo requiere que cada unidad terminal esté completa con su placa frontal.

Si existe un conector NIST, DISS o SIS, se debe demostrar que el niple apropiado se puede insertar en el cuerpo del conector y quedar retenido de forma segura por la tuerca. Si existe un dispositivo que impida el giro, se debe demostrar que tal dispositivo retiene el cabezal en la orientación correcta.

Para cada conector NIST, DISS o SIS, se debe demostrar que el niple apropiado se puede insertar en el cuerpo del conector y que queda retenido de forma segura por la tuerca.

NOTA Este ensayo se puede efectuar simultáneamente con los ensayos descritos en los apartados 12.6.4, 12.6.5.2, 12.6.5.3 y 12.6.16.

#### **12.6.5.2 Selectividad del gas**

Se debe demostrar para cada unidad terminal que el gas (o el vacío) se libera solamente cuando se inserta y queda retenido el cabezal correcto, que ningún otro tipo de cabezal utilizado en la misma instalación sanitaria puede quedar retenido y que no se libera ningún gas (ni vacío) cuando se inserta cualquier otro tipo de cabezal utilizado en la misma instalación sanitaria.

Si existe instalado un conector NIST, DISS o SIS, se debe demostrar que solamente el niple correcto se puede insertar en el cuerpo del conector y quedar asegurado mediante la tuerca y que no se puede insertar ni asegurar ningún niple para otro gas o para el vacío.

Se debe demostrar que el conector de entrada de cada ensamblado de suministro de mantenimiento es selectivo del gas.

NOTA Este ensayo se puede efectuar simultáneamente con los ensayos descritos en los apartados 12.6.3, 12.6.4, 12.6.5.1, 12.6.5.3 y 12.6.16.

#### **12.6.5.3 Identificación**

Se deben comprobar la identificación y el etiquetado correctos de todas las unidades terminales.

NOTA Este ensayo se puede efectuar simultáneamente con los ensayos descritos en los apartados 12.6.4, 12.6.5.1, 12.6.5.2 y 12.6.16.

### **12.6.6 Ensayos o comprobaciones de las prestaciones del sistema**

Cada sistema de canalización debe demostrar que mantiene el caudal de diseño del sistema a la presión de distribución nominal.

Se debe demostrar utilizando ensayos, verificación de los cálculos u otros métodos adecuados, que mientras el sistema está manteniendo el caudal de diseño del mismo, se cumplen los requisitos dados en el apartado 7.2.1, tabla 2 y en los apartados 7.2.2, 7.2.3 y 7.2.4 en las unidades terminales seleccionadas.

### **12.6.7 (\*) Ensayos de las válvulas de descarga de presión**

Las prestaciones de las válvulas de descarga de presión deben cumplir los requisitos especificados en los apartados 7.2.5 y 7.2.6.

Si existen instaladas válvulas de descarga de presión que hayan pasado el ensayo de tipo y estén certificadas, no se requiere el ensayo después de la instalación. El fabricante debe proporcionar la evidencia de la conformidad.

NOTA La reglamentación regional o nacional puede requerir la provisión de la evidencia a un organismo notificado o autoridad competente si así lo solicitan.



### 12.6.8 Ensayos de todas las fuentes de suministro

Cada fuente de suministro se debe verificar frente a sus especificaciones del fabricante o se debe ensayar para todas las condiciones de funcionamiento y de emergencia especificadas, incluido el cambio de una fuente de suministro a otra, de acuerdo con sus instrucciones de uso y con los requisitos de esta parte de la Norma ISO 7396.

### 12.6.9 Ensayos de los sistemas de monitorización y alarma

Se deben ensayar las prestaciones de todos los sistemas de monitorización y alarma en todas las condiciones de funcionamiento y de emergencia especificadas de acuerdo con sus instrucciones de uso y con los requisitos de esta parte de la Norma ISO 7396.

### 12.6.10 Ensayo de contaminación por partículas de los sistemas de distribución canalizada

Se debe ensayar la contaminación por partículas de los sistemas de distribución canalizada para gases medicinales comprimidos. El ensayo se debe efectuar utilizando el dispositivo mostrado en la figura 1 a un caudal de 150 l/min durante al menos 15 s.

El filtro debe estar exento de materia particulada cuando se observa bajo una iluminación adecuada. Pueden ser necesarios procedimientos de purgado para cumplir este requisito.

NOTA Para este ensayo se pueden utilizar métodos alternativos cuya exactitud se similar o superior.

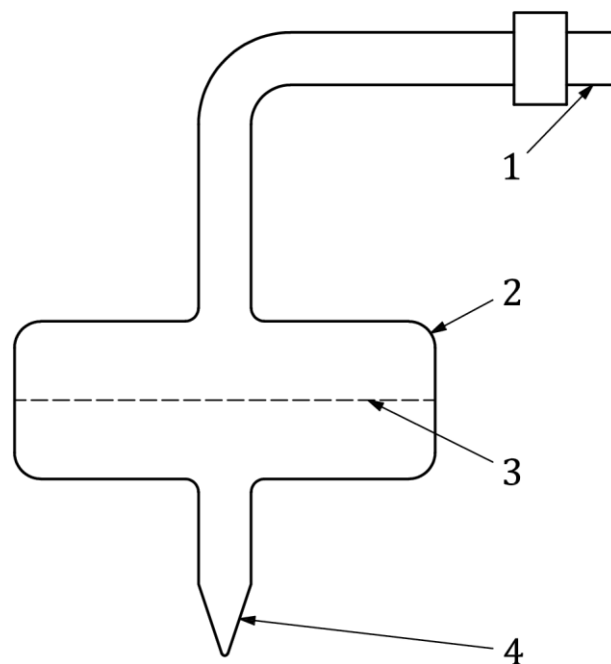

#### Leyenda

- 1 Cabezal selectivo del gas (intercambiable)
- 2 Soporte del filtro especificado para soportar 1 000 kPa
- 3 Filtro de  $(50 \pm 5)$  mm de diámetro y  $10 \mu\text{m}$  de tamaño de poro
- 4 Chorro calibrado (intercambiable) para proporcionar un caudal de 150 l/min a la presión de distribución nominal

**Figura 1 – Dispositivo de ensayo para la determinación cualitativa de contaminación por partículas de los sistemas de distribución canalizada**

### **12.6.11 Ensayos de la calidad del aire para uso médico producido por los sistemas de suministro con compresor(es) de aire**

Antes de llenar las canalizaciones, se debe ensayar que el aire para uso médico suministrado por los sistemas compresores de aire cumple los requisitos del apartado 5.5.2.1.

NOTA 1 Los métodos de ensayo se dan en las monografías de la farmacopea pertinente. Se pueden utilizar métodos de análisis equivalentes y validados.

NOTA 2 Cuando la concentración de vapor de agua o de oxígeno se miden corriente abajo de un ensamblado de latiguillos dentro de una unidad de suministro médico, puede ser necesario el purgado antes de efectuar la medición porque los ensamblados de latiguillos del gas medicinal hechos de material polimérico son permeables al vapor de agua y más permeables al oxígeno que al nitrógeno. Con el tiempo, la concentración de vapor de agua dentro del latiguillo puede sobrepasar el límite de  $67 \text{ ml/m}^3$  y la concentración local de oxígeno puede descender.

### **12.6.12 Ensayos de la calidad del aire motriz para instrumentos quirúrgicos producido por los sistemas de suministro con compresor(es) de aire**

Antes de llenar las canalizaciones, se debe ensayar que el aire motriz para instrumentos quirúrgicos suministrado por los sistemas compresores de aire dedicados cumple los requisitos del apartado 5.5.2.4.

NOTA Cuando la concentración de vapor de agua o de oxígeno se miden corriente abajo de un ensamblado de latiguillos dentro de una unidad de suministro médico, puede ser necesario el purgado antes de efectuar la medición porque los ensamblados de latiguillos del gas medicinal hechos de material polimérico son permeables al vapor de agua y más permeables al oxígeno que al nitrógeno. Con el tiempo, la concentración de vapor de agua dentro del latiguillo puede sobrepasar el límite de  $67 \text{ ml/m}^3$  y la concentración local de oxígeno puede descender.

### **12.6.13 Ensayos de la calidad del aire para uso médico producido por los sistemas de suministro con unidad(es) mezcladoras**

Antes de llenar las canalizaciones, se debe ensayar que el aire para uso médico suministrado por los sistemas mezcladores cumple los requisitos del apartado 5.5.3.1.

NOTA 1 Los métodos de ensayo se dan en las monografías de la farmacopea pertinente. Se pueden utilizar métodos de análisis alternativos.

### **12.6.14 Ensayos de la calidad del oxígeno 93 producido por sistemas de suministro con concentrador(es) de oxígeno**

Antes de llenar las canalizaciones, se debe ensayar que el oxígeno 93 cumple los requisitos del apartado 5.6.5.

NOTA 1 Los métodos de ensayo se dan en las monografías de la farmacopea pertinente. Se pueden utilizar métodos de análisis alternativos.

NOTA 2 Puede existir reglamentación regional o nacional aplicable al oxígeno 93 producido por sistemas de suministro con concentrador(es) de oxígeno.

### **12.6.15 Llenado con el gas específico**

Cada sistema de distribución canalizada para gases medicinales comprimidos se debe llenar, y vaciar, de su gas específico un número suficiente de veces para desplazar al gas de ensayo. Cada unidad terminal se debe abrir sucesivamente para permitir que el gas específico llene el sistema de canalización.

### **12.6.16 Ensayos de la identidad del gas**

Se debe efectuar una verificación de la identidad del gas en cada unidad terminal después de llenarla con su gas específico. El flujo de salida de gas de cada unidad terminal se debe ensayar utilizando un analizador de gas apropiado para confirmar la presencia del gas deseado. Se debe medir y registrar la concentración del gas nominal.

NOTA 1 Este ensayo se puede efectuar simultáneamente con los ensayos descritos en los apartados 12.6.11, 12.6.12, 12.6.13 y 12.6.14.

NOTA 2 Puede existir reglamentación nacional o regional que permita otros criterios de muestreo.

### 12.6.17 Verificación del reinicio después de un fallo de la alimentación eléctrica

Un sistema de suministro conectado al sistema eléctrico de emergencia debe ser capaz de iniciarse automáticamente cuando se estabilice la potencia esencial (de la red o de una fuente de alimentación eléctrica de emergencia) y debe reiniciarse automáticamente cuando se restablezca la alimentación eléctrica normal.

La conformidad se debe verificar efectuando ensayos apropiados.

Estos ensayos se han de efectuar en colaboración con la dirección de la instalación sanitaria.

## 12.7 Declaración de la conformidad con esta parte de la Norma ISO 7396

**12.7.1** *(adviértase que este apartado está escrito deliberadamente en NEGRITA)* **Antes de utilizar un sistema de canalización de gases medicinales, se debe emitir un certificado escrito a nombre de la instalación sanitaria indicando que se han cumplido todos los requisitos de los apartados 12.3 y 12.4. Los resultados de los ensayos mostrando los detalles de los servicios y zonas ensayadas debería ser parte del registro permanente de la instalación sanitaria.**

Los impresos típicos para este fin se dan en el anexo D.

NOTA La declaración se puede emitir en dos partes:

- Parte 1: para cubrir los ensayos de los requisitos de los apartados 12.3 y 12.4 [puntos a) al j)], es decir, hasta el apartado 12.6.10 inclusive;
- Parte 2: para cubrir los ensayos de los requisitos de los apartados 12.6.11 al 12.6.16 que se efectúan después de completar el contrato de la instalación pero que no se necesitan hacer inmediatamente.

**12.7.2** El fabricante del sistema debe garantizar que todos los dibujos y manuales, según requiere el capítulo 13, han sido suministrados al dueño o cliente.

**12.7.3** Cuando todos los ensayos se han completado satisfactoriamente, se deben eliminar todas las etiquetas de construcción que se hayan colocado.

## 13 Información a suministrar por el fabricante

### 13.1 Generalidades

La información a proporcionar por el fabricante debe cumplir la Norma EN 1041 o normas nacionales equivalentes.

### 13.2 Instrucciones de instalación

El fabricante debe proporcionar al instalador las instrucciones adecuadas para la instalación del sistema de suministro completo.

### 13.3 Instrucciones de uso

**13.3.1** El fabricante del sistema completo o el fabricante de cada componente del sistema de canalización de gases medicinales (es decir, de los sistemas de suministro, del sistema de monitorización y alarma y del sistema de distribución canalizada) debe proporcionar a la instalación sanitaria las instrucciones de uso.

NOTA 1 El sistema de suministro, el sistema de monitorización y alarma y el sistema de distribución canalizada los pueden suministrar uno o varios fabricantes diferentes.

NOTA 2 Puede existir reglamentación regional o nacional aplicable a los fabricantes de productos sanitarios.

**13.3.2** Cuando no existen normas nacionales sobre la información a proporcionar por el fabricante, las instrucciones de uso deben contener lo siguiente:

- el nombre o nombre comercial y la dirección del fabricante o, cuando el fabricante no está establecido en la Comunidad, un representante autorizado establecido en la Comunidad;
- el año de fabricación y, cuando proceda, una indicación de la fecha a partir de la cual se deberían utilizar, con seguridad, el sistema y sus componentes, expresada como el año y el mes;
- cualquier condición de almacenamiento y/o manipulación especial;
- cualquier instrucción de utilización especial;
- cualquier advertencia y/o precaución a tomar;
- el número de identificación;
- una especificación técnica incluyendo las prestaciones del sistema y cómo conectar y desconectar las partes y los accesorios separables;
- una descripción de todas las señales de alarma y de las señales de información;
- la posición en la condición normal (es decir, abiertas o cerradas) de todas las válvulas de corte;
- las instrucciones para las comprobaciones periódicas recomendadas de la función del sistema. Si existen filtros instalados, y no se programa el cambio periódico del(de los) elemento(s) del filtro, se debe proporcionar un medio de verificar el estado de los elementos del filtro;
- la información adecuada sobre el producto o productos medicinales que el sistema está diseñado que suministre;
- las instrucciones para el desecho de los componentes o fungibles (por ejemplo, el aceite utilizado en los compresores y bombas de vacío, los filtros bacterianos, los filtros de carbón vegetal, los filtros moleculares, los desecadores);
- las concentraciones de oxígeno mínima y máxima suministradas por la(s) unidad(es) concentradora(s) de oxígeno al caudal de diseño del sistema en las condiciones ambientales especificadas por la instalación sanitaria;
- el procedimiento para iniciar la(s) unidad(es) concentradora(s) de oxígeno, si procede;
- el tiempo de inicio de la(s) unidad(es) concentradora(s) de oxígeno, si procede.

**13.3.3** Las instrucciones de uso dadas en el apartado 13.3.2 se deben redactar teniendo en cuenta la posibilidad de que existan varias partes interesadas diferentes comprometidas en el funcionamiento, uso y mantenimiento.

## **13.4 Información de la gestión operacional**

**13.4.1** El(los) fabricante(s) de cada componente del sistema de canalización de gases medicinales (es decir, los sistemas de suministro, el sistema de supervisión y alarma y el sistema de distribución canalizada) debe(n) proporcionar la información de la gestión operacional a la instalación sanitaria para permitir que ésta redacte su documento de gestión operacional.

**13.4.2** El(los) fabricante(s) del sistema deben proporcionar las instrucciones a la instalación sanitaria para las tareas de mantenimiento recomendadas y su frecuencia, y una lista de los repuestos recomendados, si procede.

El mantenimiento de las unidades terminales se debería efectuar de acuerdo con las instrucciones del fabricante para evitar las fugas.

**13.4.3** El fabricante del sistema debe proporcionar instrucciones a la instalación sanitaria sobre cómo efectuar los procedimientos de calibración y su frecuencia para todos los analizadores y sensores de alarma.

**13.4.4** El(los) fabricante(s) del sistema completo debe(n) proporcionar información para permitir a la instalación sanitaria la preparación de un procedimiento de emergencia específico para responder al fallo catastrófico de uno o más sistemas de la canalización, cuando los suministros de los gases medicinales a todos los productos sanitarios puedan cesar simultáneamente.

NOTA Las recomendaciones informativas para la preparación del documento de gestión operacional se dan en el anexo G. Las recomendaciones informativas para la gestión del riesgo se dan en el anexo F.

### **13.5 Dibujos “tal como se ha instalado”**

**13.5.1** Se debe mantener durante la construcción un conjunto separado de dibujos mecánicos “tal como se ha hecho la instalación” que muestren la ubicación real de las canalizaciones, los diámetros de las canalizaciones, las válvulas de corte (incluida su identificación, según proceda) y todos los demás componentes, y se deben actualizar conforme se hacen cambios. Estos dibujos deben incluir los detalles que permitirán localizar las canalizaciones enterradas u ocultas.

**13.5.2** Se debe entregar a la instalación sanitaria un conjunto completo de dibujos “tal como se ha hecho la instalación” del sistema de canalización según se especifica en el apartado 13.5.1 para su inclusión como parte del registro permanente del sistema de canalización.

### **13.6 Diagramas eléctricos**

El fabricante del sistema debe proporcionar a la instalación sanitaria los diagramas eléctricos para los componentes suministrados.

## Anexo A (Informativo)

### Representaciones esquemáticas de sistemas de suministro típicos y sistemas de distribución de zona

Estas representaciones esquemáticas están previstas para dar un resumen de las características esenciales de los tipos diferentes de sistemas de canalización de gases medicinales. La posición relativa de algunos componentes mostrados se puede variar para cumplir las necesidades locales. No se muestran muchos componentes definidos en los requisitos de esta parte de la Norma ISO 7396 (por ejemplo, el recambio automático). Las líneas de rayas indican canalizaciones adicionales. Estos esquemas son para recomendación general y no son normativos. Las figuras no son exhaustivas y pueden ser posibles otras disposiciones igualmente conformes.

La tabla A.1 da un resumen de las figuras A.1 a A.26. Las tablas A.2 y A.3 dan las leyendas de los componentes y subensamblados, respectivamente, de las características mostradas en las figuras A.1 a A.26.

**Tabla A.1 – Leyenda de las figuras A.1 a A.26**

| Referencia del dibujo | Descripción del sistema                                                                                                                                                                                                                                                                                                                                                             |
|-----------------------|-------------------------------------------------------------------------------------------------------------------------------------------------------------------------------------------------------------------------------------------------------------------------------------------------------------------------------------------------------------------------------------|
| A.1                   | Sistema de suministro de gas medicinal que comprende <ul style="list-style-type: none"> <li>– Dos botellas / sistemas de conector de distribución de bloque de botellas y un sistema de recambio del conector de distribución</li> <li>– Una botella / sistema de conector de distribución de bloque de botellas</li> </ul>                                                         |
| A.2                   | Sistema de suministro de aire o nitrógeno motriz para instrumentos quirúrgicos que comprende <ul style="list-style-type: none"> <li>– Dos botellas / sistemas de conector de distribución de bloque de botellas y un sistema de recambio del conector de distribución</li> </ul>                                                                                                    |
| A.3                   | Sistema de suministro de gas medicinal que comprende <ul style="list-style-type: none"> <li>– Un sistema de recipientes para almacenamiento criogénico</li> <li>– Dos botellas / sistemas de conector de distribución de bloque de botellas y un sistema de recambio del conector de distribución</li> </ul>                                                                        |
| A.4                   | Sistema de suministro de gas medicinal que comprende <ul style="list-style-type: none"> <li>– Dos sistemas de recipientes para almacenamiento criogénico</li> <li>– Una botella / sistemas de conector de distribución de bloque de botellas</li> </ul>                                                                                                                             |
| A.5                   | Sistema de suministro de aire para uso médico que comprende <ul style="list-style-type: none"> <li>– Una unidad de compresor de aire para uso médico</li> <li>– Una unidad acondicionadora / depósito de aire para uso médico</li> <li>– Dos botellas / sistemas de conector de distribución de bloque de botellas y un sistema de recambio del conector de distribución</li> </ul> |
| A.6                   | Sistema de suministro de aire para uso médico que comprende <ul style="list-style-type: none"> <li>– Dos unidades de compresor de aire para uso médico</li> <li>– Dos unidades acondicionadoras / depósitos de aire para uso médico</li> <li>– Una botella / sistema de conector de distribución de bloque de botellas</li> </ul>                                                   |
| A.7                   | Sistema de suministro de aire para uso médico (disposición alternativa) que comprende <ul style="list-style-type: none"> <li>– Dos unidades de compresor de aire para uso médico</li> <li>– Dos unidades acondicionadoras / depósitos de aire para uso médico</li> <li>– Una botella / sistema de conector de distribución de bloque de botellas</li> </ul>                         |

| Referencia del dibujo | Descripción del sistema                                                                                                                                                                                                                                                                                                                                                |
|-----------------------|------------------------------------------------------------------------------------------------------------------------------------------------------------------------------------------------------------------------------------------------------------------------------------------------------------------------------------------------------------------------|
| A.8                   | Sistema de suministro de aire para uso médico que comprende <ul style="list-style-type: none"> <li>– Tres unidades de compresor de aire para uso médico</li> <li>– Tres unidades acondicionadoras / depósitos de aire para uso médico</li> <li>– Una botella / sistema de conector de distribución de bloque de botellas opcional</li> </ul>                           |
| A.9                   | Sistema de suministro de aire para uso médico (disposición alternativa) que comprende <ul style="list-style-type: none"> <li>– Tres unidades de compresor de aire para uso médico</li> <li>– Dos unidades / depósitos acondicionadores de aire para uso médico</li> <li>– Una botella / sistema de conector de distribución de bloque de botellas opcional</li> </ul>  |
| A.10                  | Sistema de suministro de aire para uso médico (disposición alternativa) que comprende <ul style="list-style-type: none"> <li>– Tres unidades de compresor de aire para uso médico</li> <li>– Tres unidades / depósitos acondicionadores de aire para uso médico</li> <li>– Una botella / sistema de conector de distribución de bloque de botellas opcional</li> </ul> |
| A.11                  | Sistema de suministro de aire motriz para instrumentos quirúrgicos que comprende <ul style="list-style-type: none"> <li>– Una unidad de compresor de aire</li> <li>– Una unidad /depósito acondicionador de aire</li> <li>– Una botella / sistema de conector de distribución de bloque de botellas</li> </ul>                                                         |
| A.12                  | Sistema de suministro de aire motriz para instrumentos quirúrgicos que comprende <ul style="list-style-type: none"> <li>– Dos unidades de compresor de aire</li> <li>– Dos unidades / depósitos acondicionadores de aire</li> </ul>                                                                                                                                    |
| A.13                  | Sistema de suministro de aire motriz para instrumentos quirúrgicos (disposición alternativa) que comprende <ul style="list-style-type: none"> <li>– Dos unidades de compresor de aire</li> <li>– Dos unidades / depósitos acondicionadores de aire</li> </ul>                                                                                                          |
| A.14                  | Sistema de suministro de aire para uso médico sintético que comprende <ul style="list-style-type: none"> <li>– Una unidad mezcladora</li> <li>– Dos botellas / sistemas de conector de conector de distribución de bloques de botellas y un sistema de recambio del conector de distribución</li> </ul>                                                                |
| A.15                  | Sistema de suministro de aire para uso médico sintético que comprende <ul style="list-style-type: none"> <li>– Una unidad mezcladora</li> <li>– Dos unidades de compresor de aire para uso médico</li> <li>– Dos unidades / depósitos acondicionadores de aire para uso médico</li> </ul>                                                                              |
| A.16                  | Sistema de suministro de aire para uso médico sintético que comprende <ul style="list-style-type: none"> <li>– Dos unidades mezcladoras</li> <li>– Una botella / sistema de conector de distribución de bloque de botellas</li> </ul>                                                                                                                                  |
| A.17                  | Sistema de suministro de aire para uso médico sintético que comprende <ul style="list-style-type: none"> <li>– Dos unidades mezcladoras</li> <li>– Una unidad de compresor de aire para uso médico</li> <li>– Una unidad / depósito acondicionador de aire para uso médico</li> </ul>                                                                                  |
| A.18                  | Sistema de suministro de oxígeno 93 que comprende <ul style="list-style-type: none"> <li>– Una unidad concentradora de oxígeno 93</li> <li>– Dos botellas / sistemas de conector de distribución de bloque de botellas y un sistema de recambio del conector de distribución</li> </ul>                                                                                |

| Referencia del dibujo | Descripción del sistema                                                                                                                                                                                                              |
|-----------------------|--------------------------------------------------------------------------------------------------------------------------------------------------------------------------------------------------------------------------------------|
| A.19                  | Sistema de suministro de oxígeno 93 que comprende <ul style="list-style-type: none"> <li>– Dos unidades concentradoras de oxígeno 93</li> <li>– Una botella / sistema de conector de distribución de bloque de botellas</li> </ul>   |
| A.20                  | Sistema de suministro de oxígeno 93 que comprende <ul style="list-style-type: none"> <li>– Dos unidades concentradoras de oxígeno 93</li> <li>– Un sistema de depósito de oxígeno 93 de alta presión</li> </ul>                      |
| A.21                  | Sistema de suministro de oxígeno 93 que comprende <ul style="list-style-type: none"> <li>– Tres unidades concentradoras de oxígeno 93</li> </ul>                                                                                     |
| A.22                  | Sistema de suministro de vacío que comprende <ul style="list-style-type: none"> <li>– Tres unidades de bomba de vacío</li> <li>– Un receptor de vacío</li> <li>– Dos filtros bacterianos</li> <li>– Una trampa de drenaje</li> </ul> |
| A.23                  | Sistema de distribución canalizada de gas medicinal de una sola etapa                                                                                                                                                                |
| A.24                  | Sistema de distribución canalizada de gas medicinal de dos etapas                                                                                                                                                                    |
| A.25                  | Sistema de distribución canalizada de gas medicinal de una sola etapa que incluye un sistema de distribución de aire motriz para instrumentos quirúrgicos                                                                            |
| A.26                  | Sistema de distribución de zona de la canalización de gas medicinal                                                                                                                                                                  |

**Tabla A.2 – Leyenda de la designación de los componentes en las figuras A.21 a A.26**

| Leyenda | Nombre del componente                                                                                     |
|---------|-----------------------------------------------------------------------------------------------------------|
| A       | Botellas / bloques de botellas                                                                            |
| B       | Sistema de conector de distribución de botellas                                                           |
| C       | Sistema de recambio del conector de distribución                                                          |
| D       | Sistema de recipientes de almacenamiento criogénico                                                       |
| E       | Vaporizador mediante aire calentado para elevar la presión                                                |
| F       | Vaporizador mediante aire ambiente calentado para suministro de gas                                       |
| G       | Unidad de compresor de aire                                                                               |
| H       | Unidad acondicionadora                                                                                    |
| I       | Depósito de gas medicinal (aire para uso médico / oxígeno 93 / aire motriz para instrumentos quirúrgicos) |
| J       | Unidad de suministro de almacenamiento criogénico                                                         |
| K       | Unidad mezcladora (mezclador / analizador)                                                                |
| L       | Depósito de aire para uso médico sintético                                                                |
| M       | Analizador de aire para uso médico sintético / oxígeno 93                                                 |
| N       | Concentrador de oxígeno 93                                                                                |
| O       | Compresor elevador de presión de oxígeno 93                                                               |



| <b>Leyenda</b> | <b>Nombre del componente</b>                                                                                                 |
|----------------|------------------------------------------------------------------------------------------------------------------------------|
| P              | Depósito de oxígeno 93 de alta presión                                                                                       |
| Q              | Sistema de control de la presión de oxígeno 93                                                                               |
| R              | Unidad de bomba de vacío                                                                                                     |
| S              | Receptor de vacío                                                                                                            |
| T              | Filtro bacteriano                                                                                                            |
| U              | Trampa de drenaje                                                                                                            |
| V              | Sistema de distribución de zona de gas medicinal                                                                             |
| W              | Sistema de distribución de zona para aire motriz para instrumentos quirúrgicos                                               |
| X              | Sistema de distribución de zona para aire para uso médico                                                                    |
| AA             | Conexión entre el sistema de suministro de gas medicinal o vacío y el sistema de distribución canalizada                     |
| BB             | Conexión alternativa para el sistema de suministro de reserva y el sistema de distribución canalizada                        |
| CC             | Conexión entre la fuente de suministro de oxígeno medicinal y el sistema de distribución canalizada de oxígeno medicinal     |
| DD             | Conexión entre la fuente de suministro de nitrógeno medicinal y el sistema de distribución canalizada de nitrógeno medicinal |
| 1              | Válvula de corte de fuente de suministro                                                                                     |
| 2              | Válvula de corte principal                                                                                                   |
| 3              | Válvula de derivación                                                                                                        |
| 4              | Válvula de ascendente                                                                                                        |
| 5              | Válvula de corte de zona                                                                                                     |
| 6              | Válvula de corte de mantenimiento                                                                                            |
| 7              | Regulador de presión de la línea                                                                                             |
| 8              | Unidad terminal                                                                                                              |
| 9              | Válvula de descarga de presión                                                                                               |
| 10             | Válvula unidireccional                                                                                                       |
| 11             | Ensamblado de suministro de mantenimiento                                                                                    |
| 12             | Interruptor de presión                                                                                                       |
| 13             | Conexión flexible                                                                                                            |

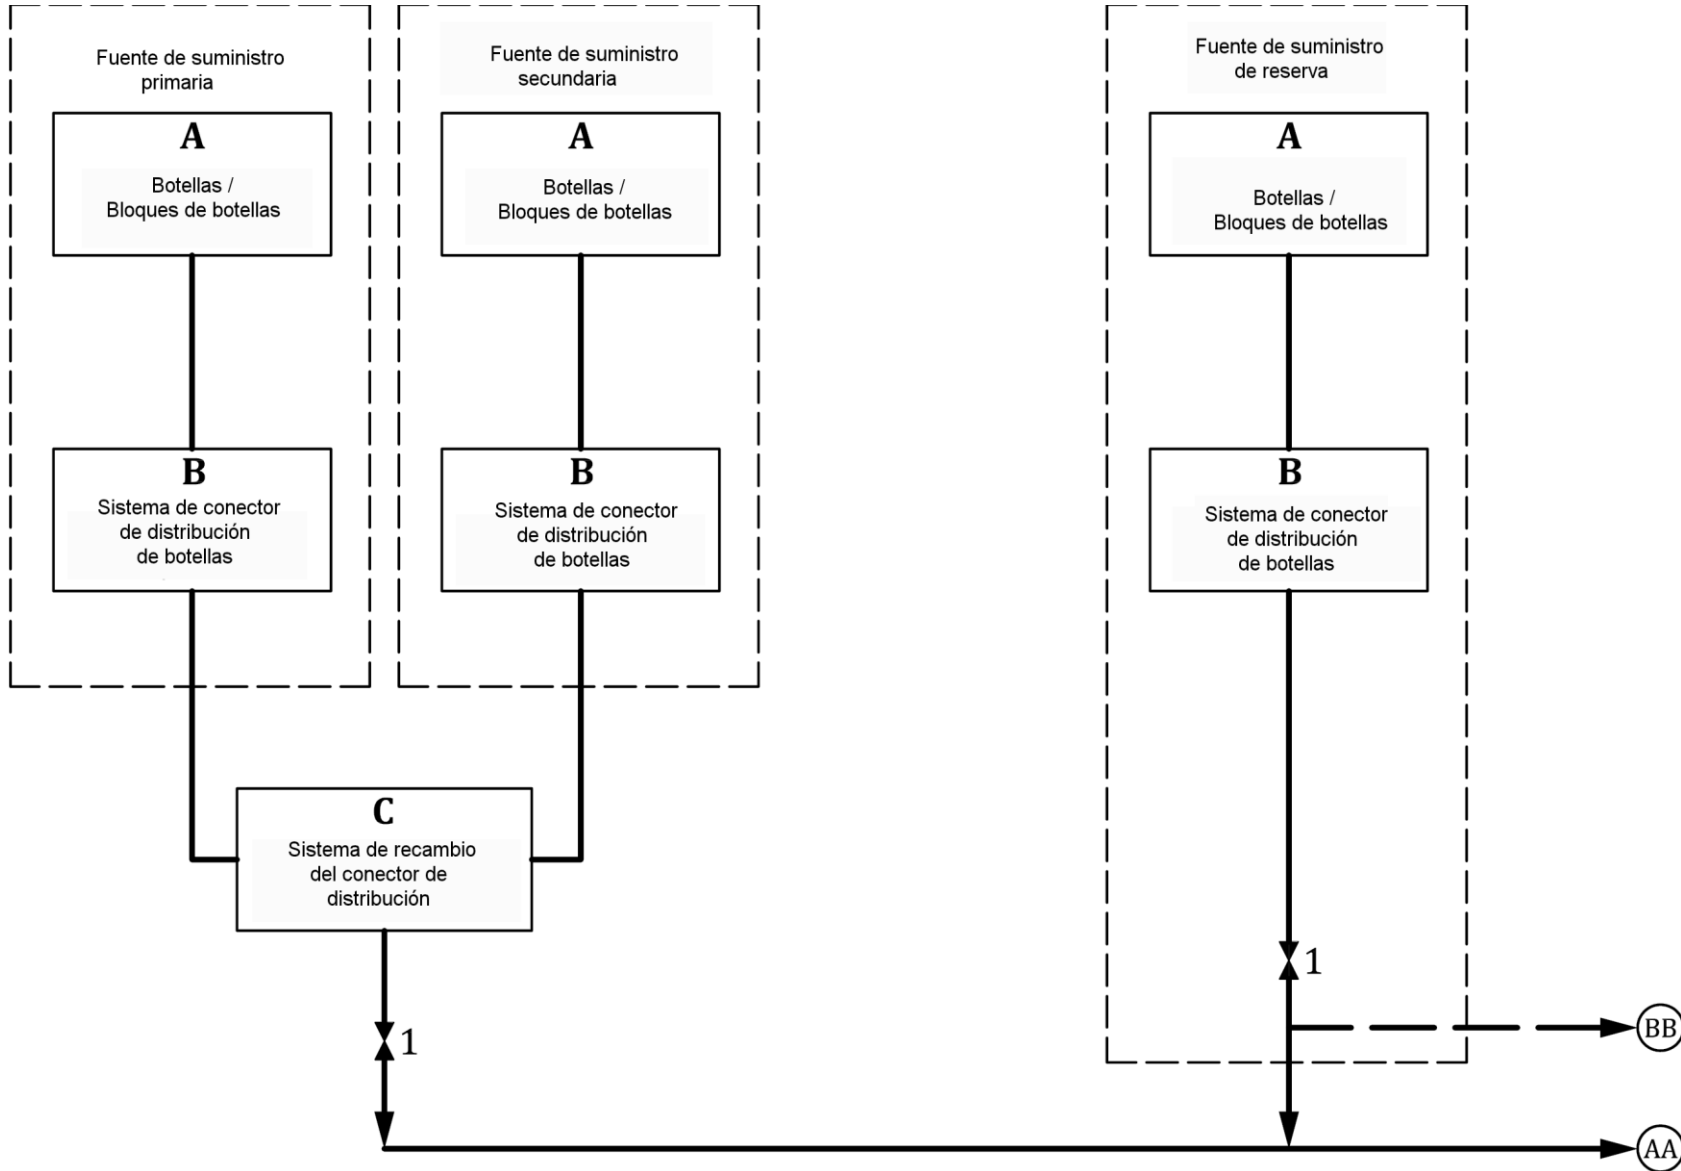

**Figura A.1 – Sistema de suministro de gas medicinal que comprende: Dos botellas / sistemas de conector de distribución de bloque de botellas y un sistema de recambio del conector de distribución; una botella / sistema de conector de distribución de bloque de botellas**

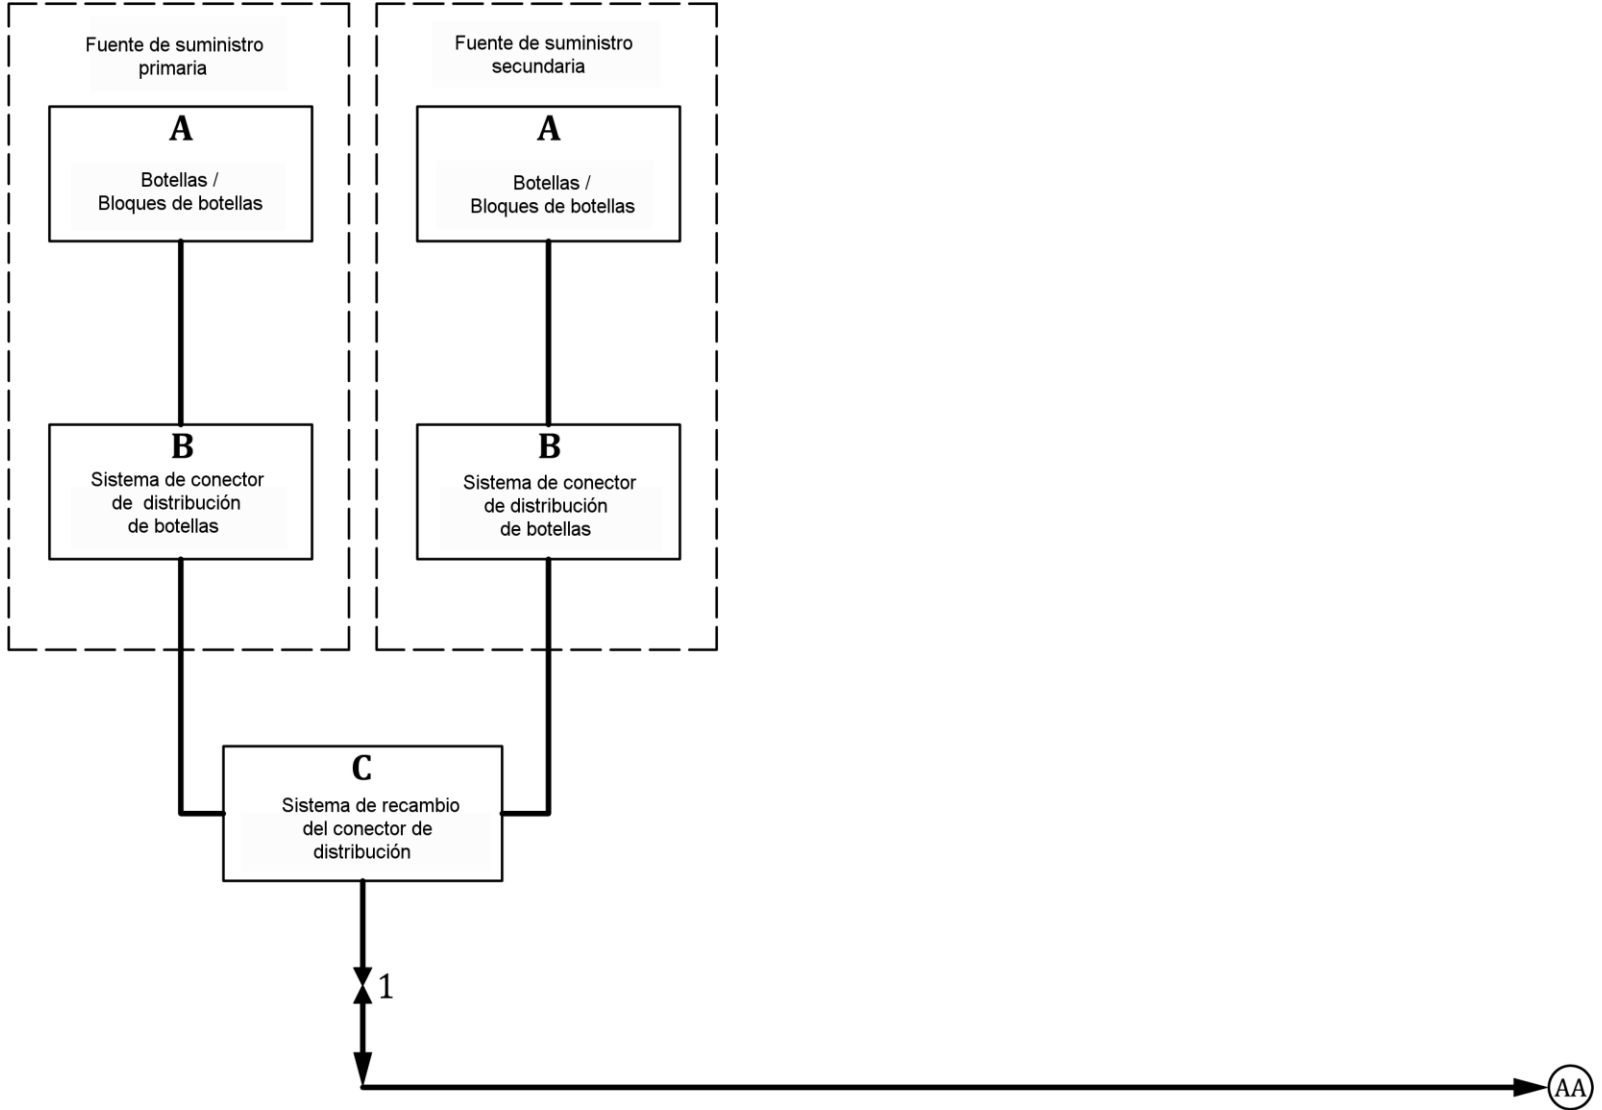

**Figura A.2 – Sistema de suministro de aire o nitrógeno motriz para instrumentos quirúrgicos que comprende: Dos botellas / sistemas de conector de distribución de bloque de botellas y un sistema de recambio del conector de distribución**

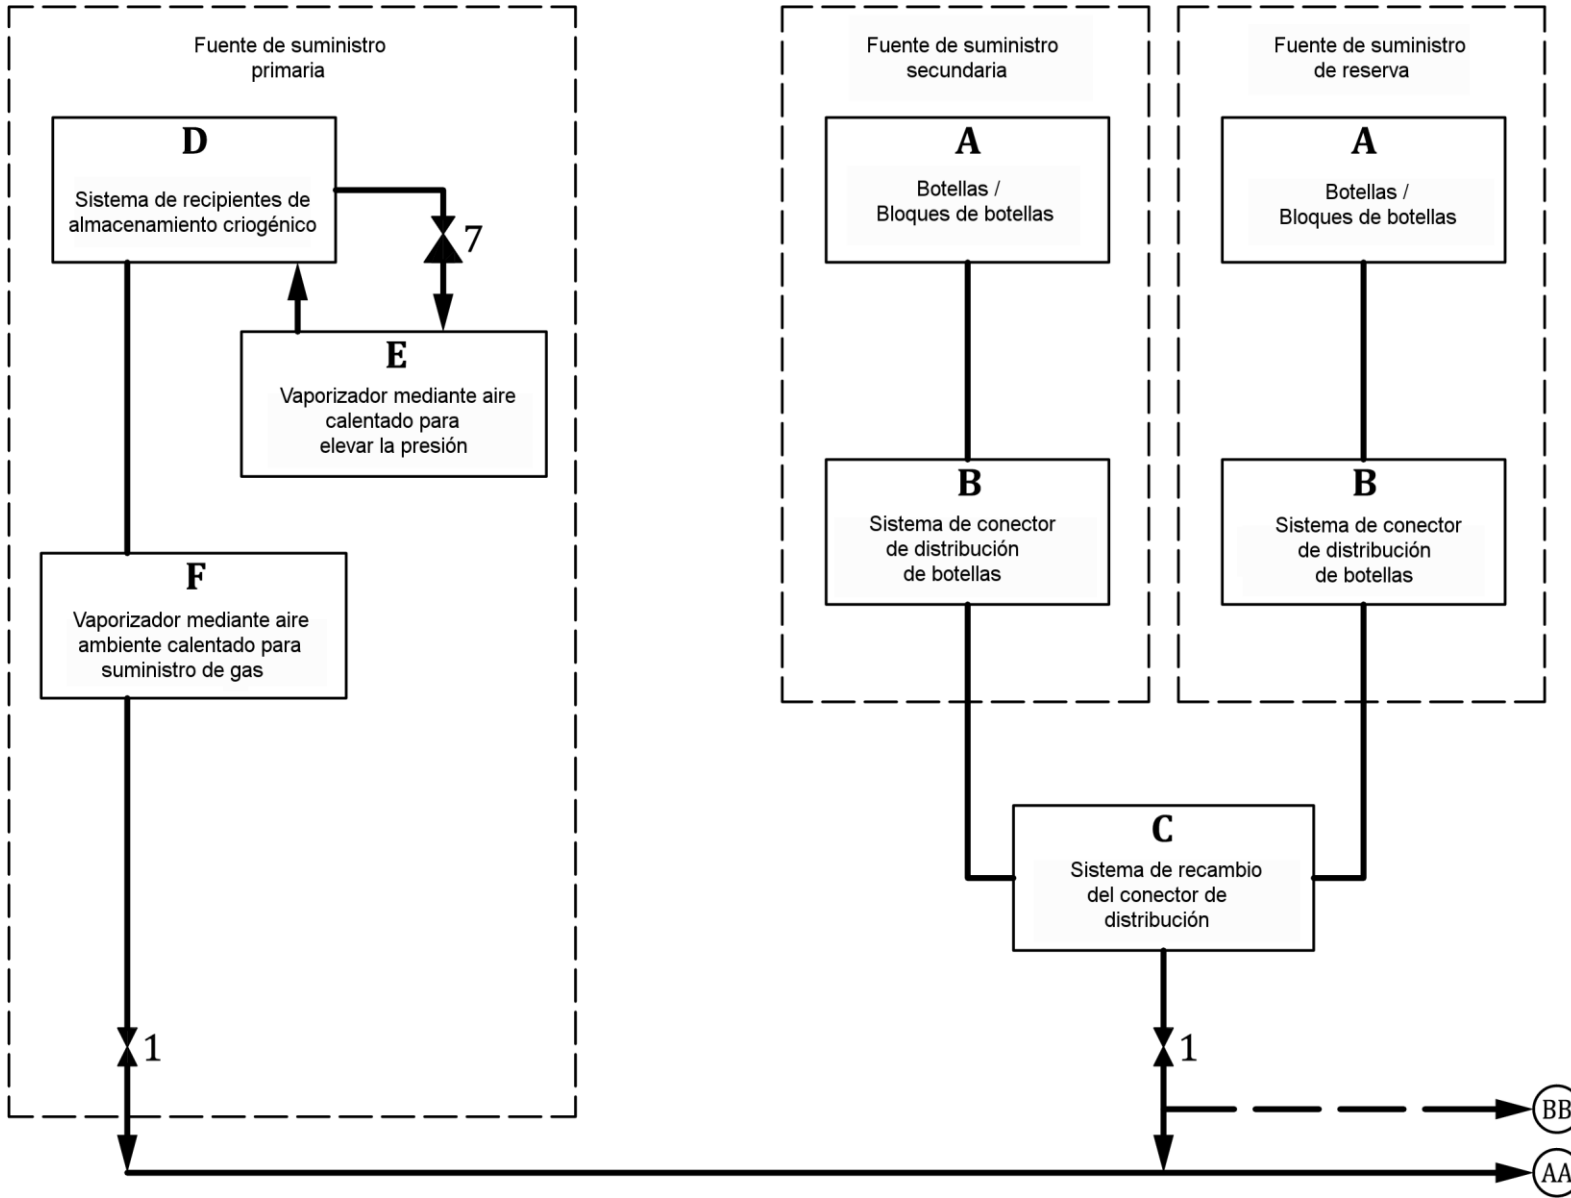

**Figura A.3 – Sistema de suministro de gas medicinal que comprende: Un sistema de recipientes para almacenamiento criogénico; dos botellas / sistemas de conector de distribución de bloque de botellas y un sistema de recambio del conector de distribución**

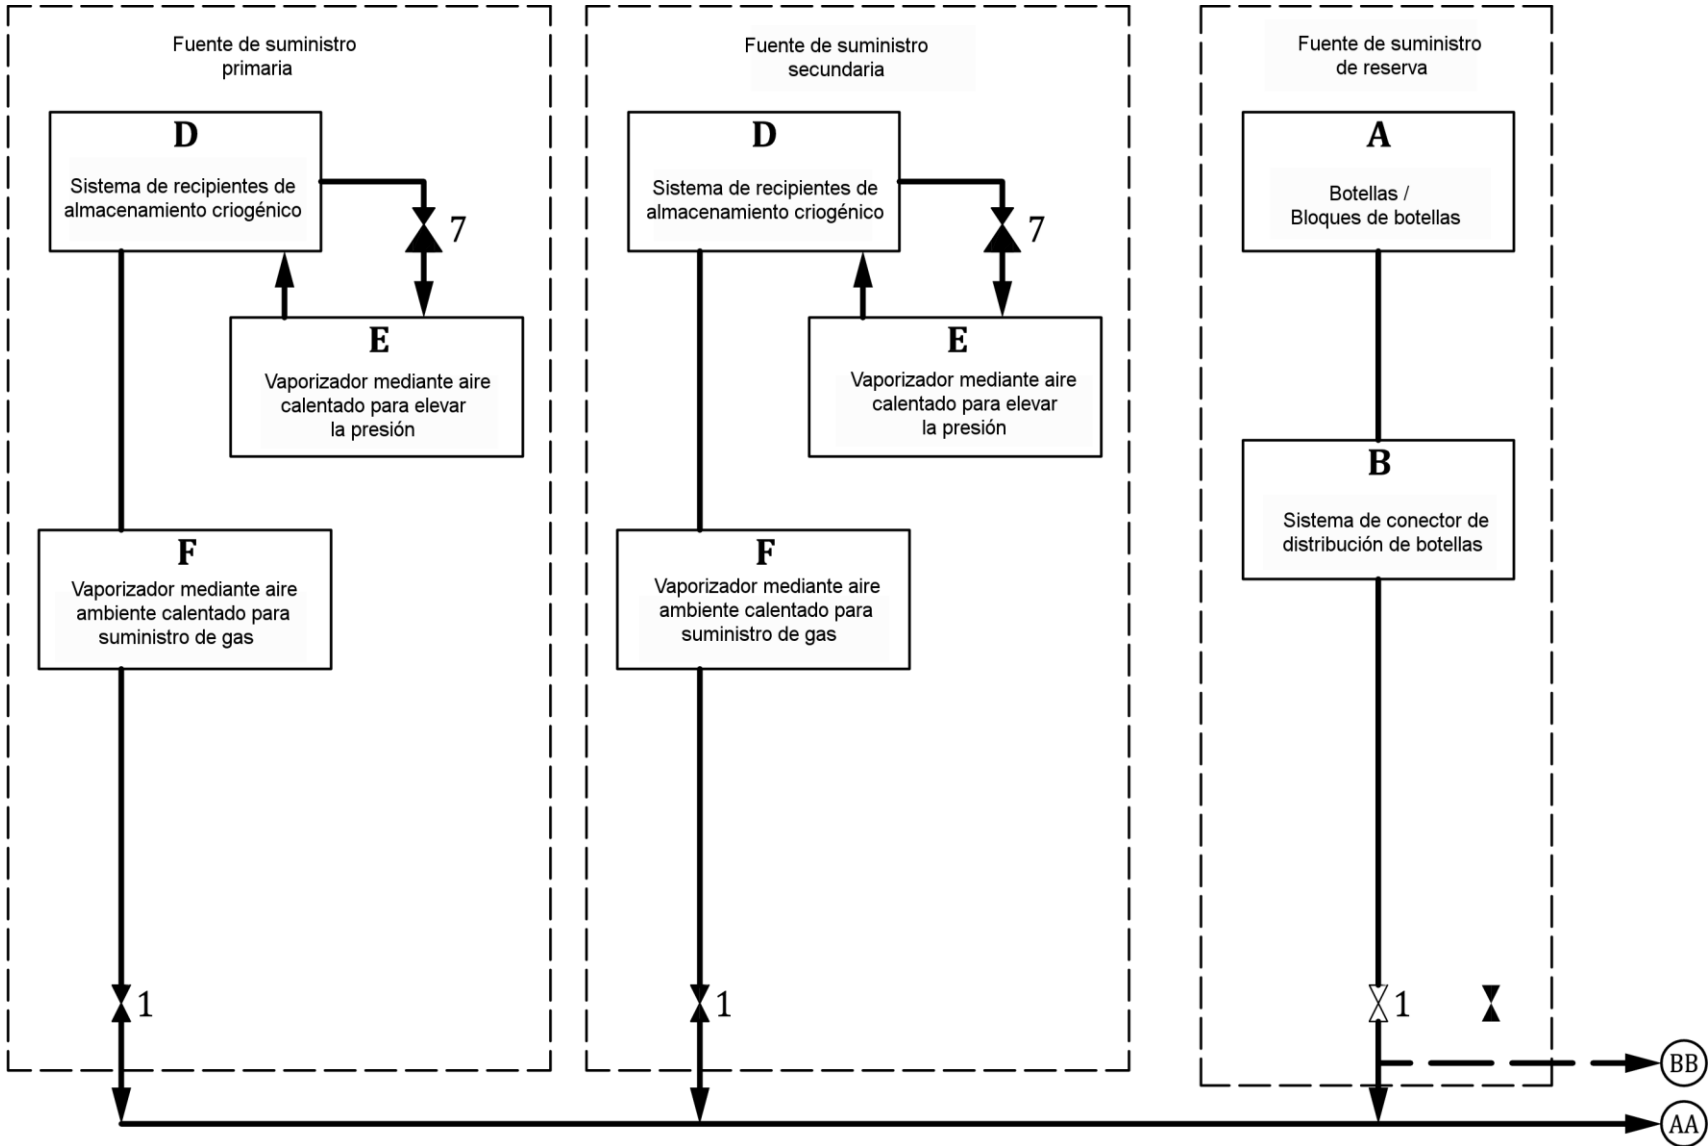

Figura A.4 – Sistema de suministro de gas medicinal que comprende: Dos sistemas de recipientes para almacenamiento criogénico; una botella / sistemas de conector de distribución de bloque de botellas

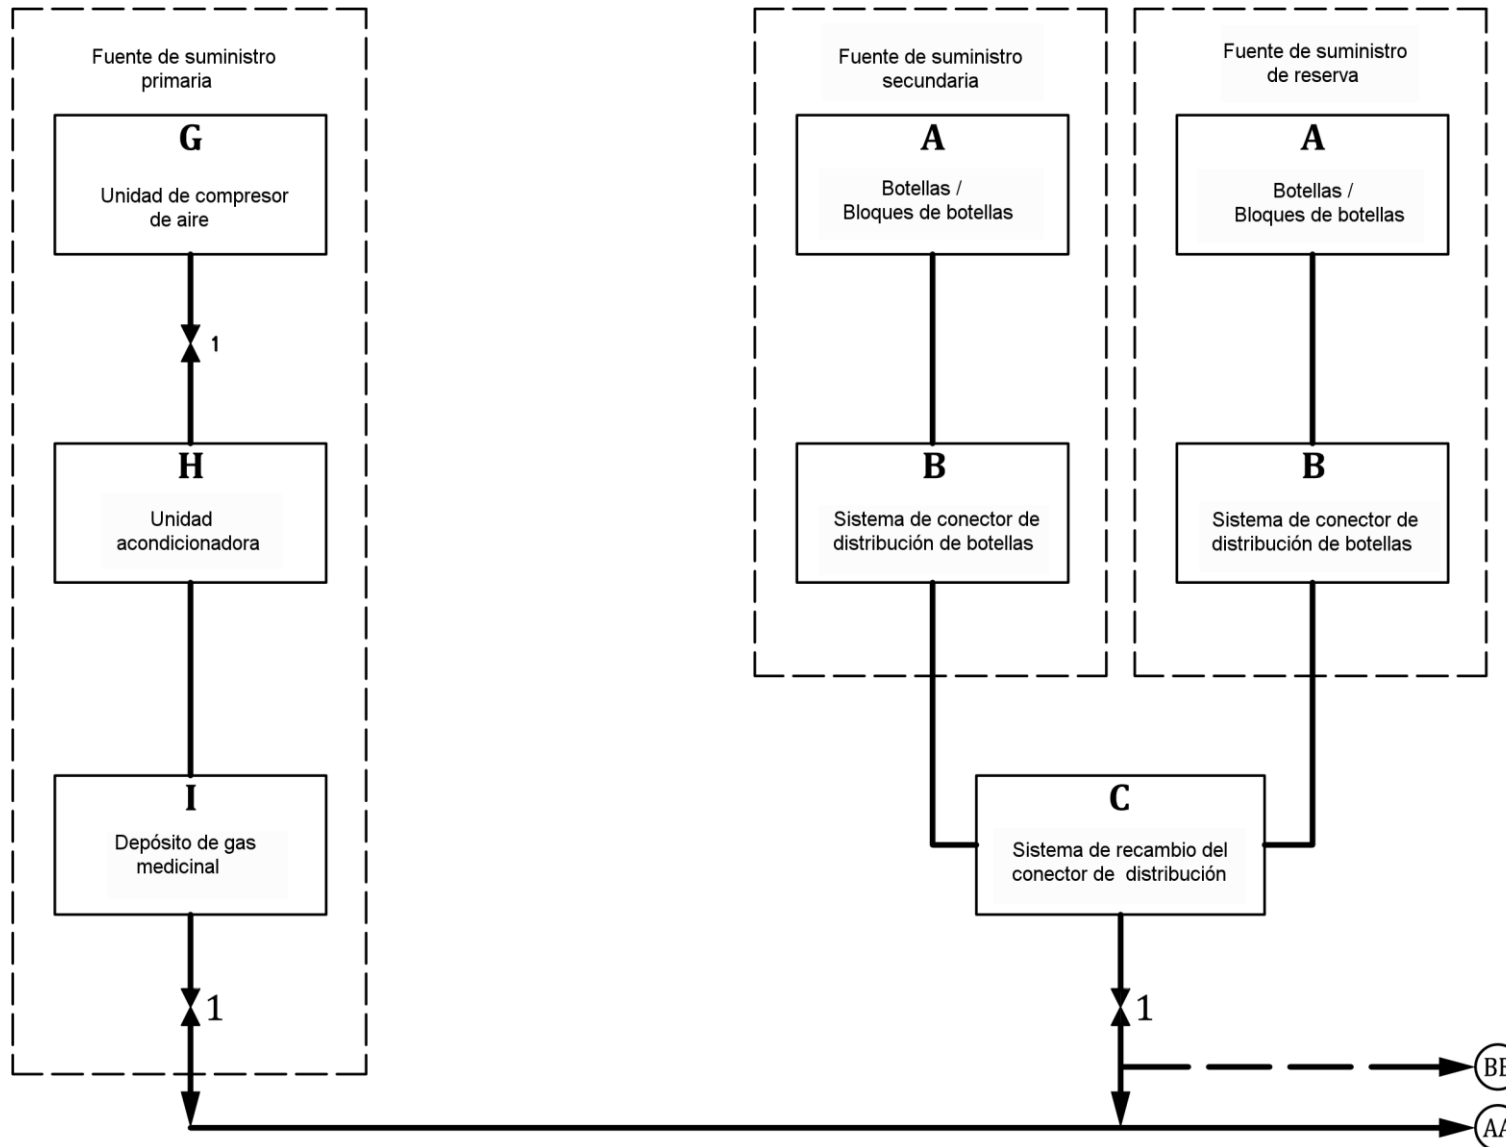

**Figura A.5 – Sistema de suministro de aire para uso médico que comprende: Una unidad de compresor de aire para uso médico, una unidad acondicionadora / depósito de aire para uso médico, dos botellas / sistemas de conector de distribución de bloque de botellas y un sistema de recambio del conector de distribución**

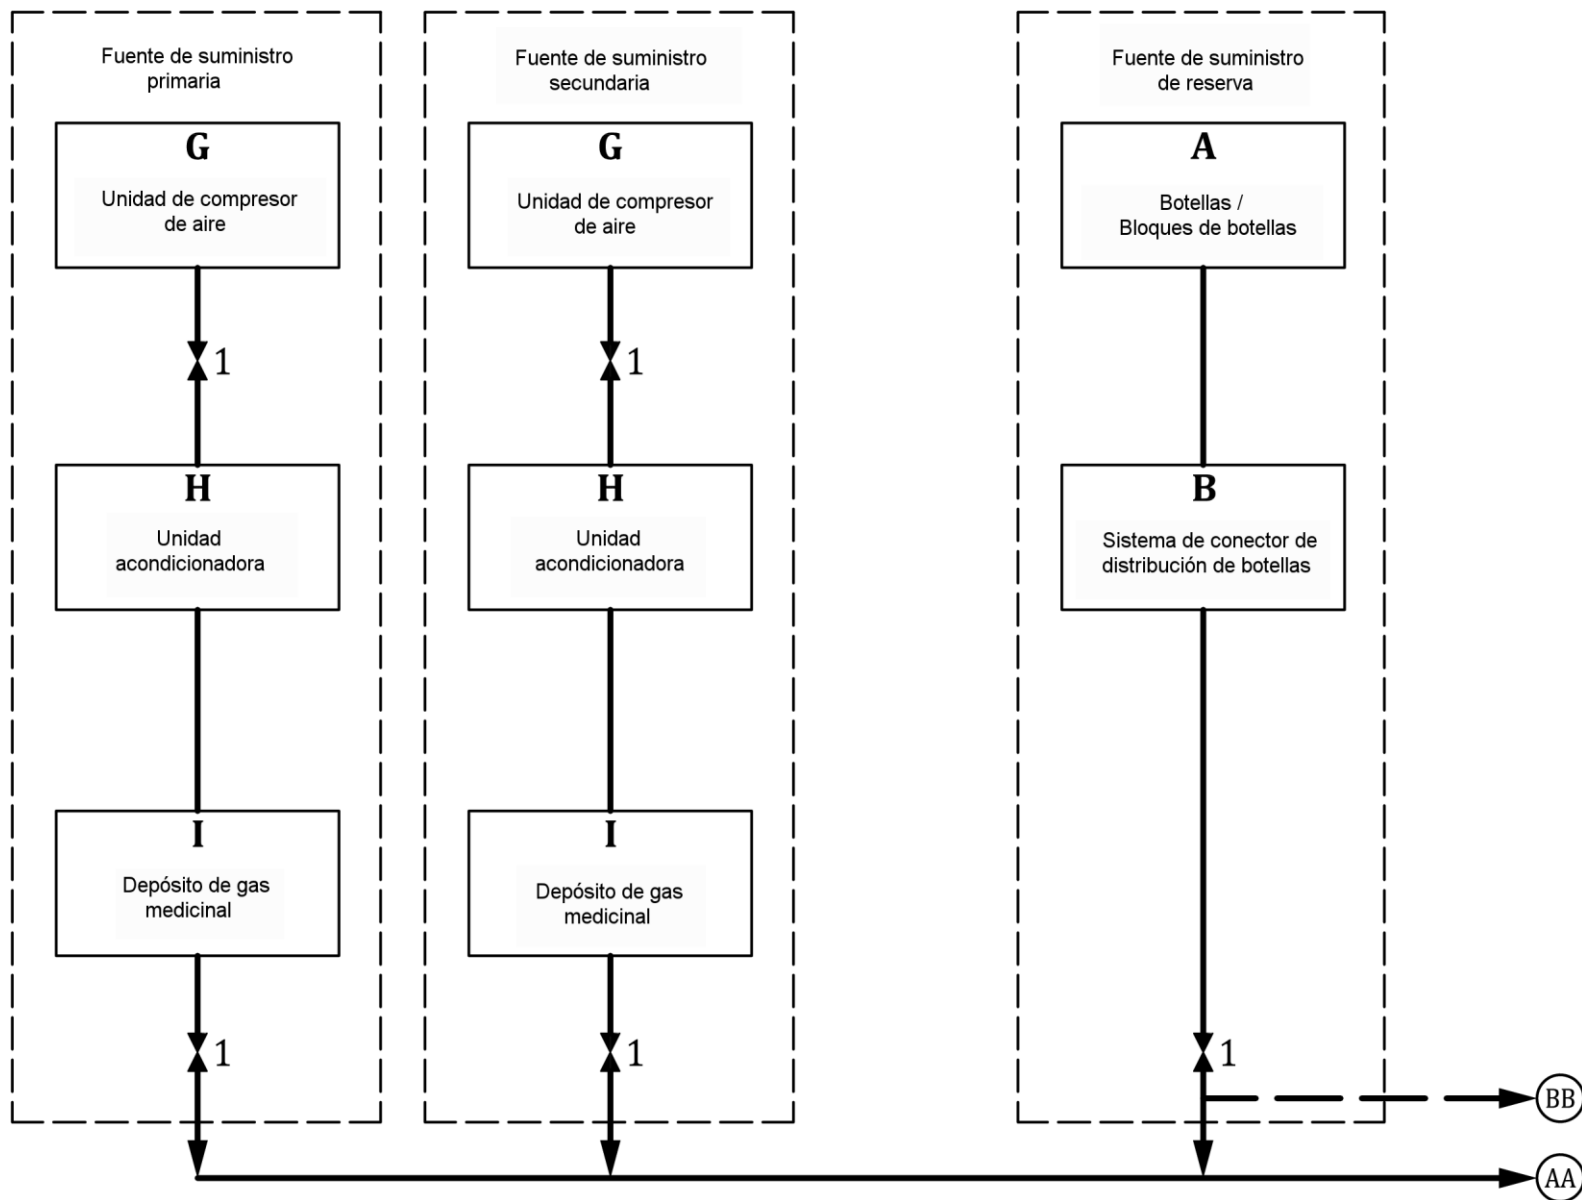

**Figura A.6 – Sistema de suministro de aire para uso médico que comprende: Dos unidades de compresor de aire para uso médico; dos unidades acondicionadoras / depósitos de aire para uso médico; una botella / sistema de conector de distribución de bloque de botellas**

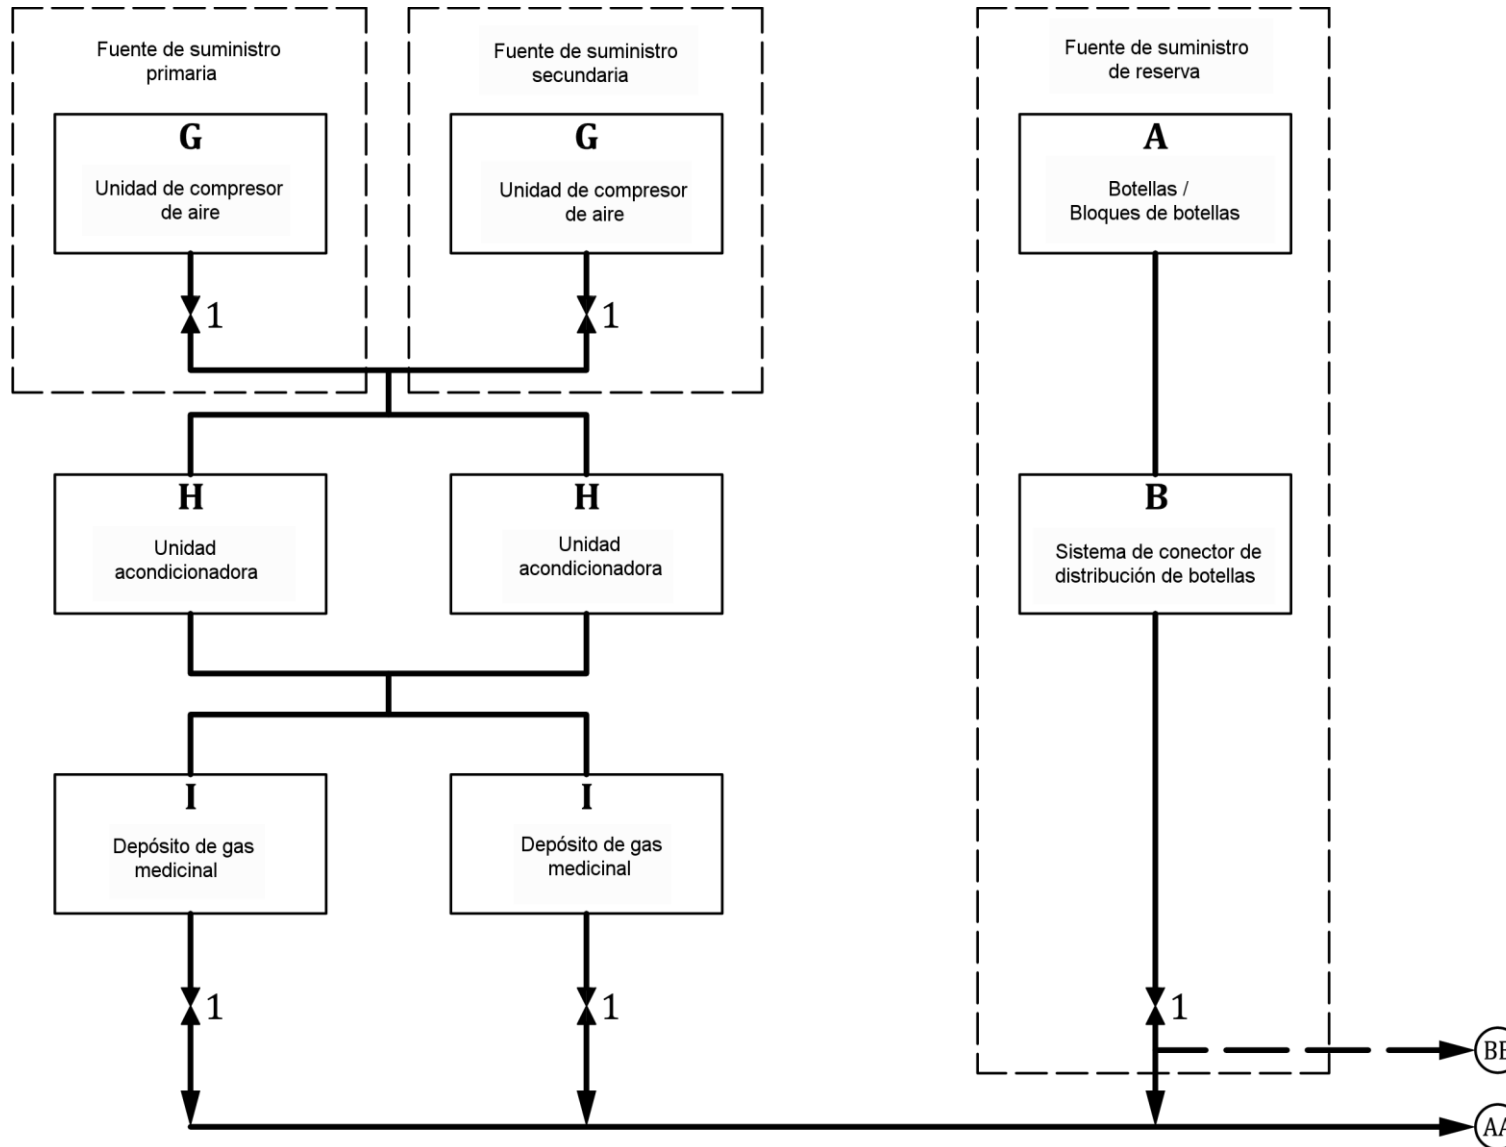

**Figura A.7 – Sistema de suministro de aire para uso médico (disposición alternativa) que comprende: Dos unidades de compresor de aire para uso médico; dos unidades acondicionadoras / depósitos de aire para uso médico; una botella / sistema de conector de distribución de bloque de botellas**



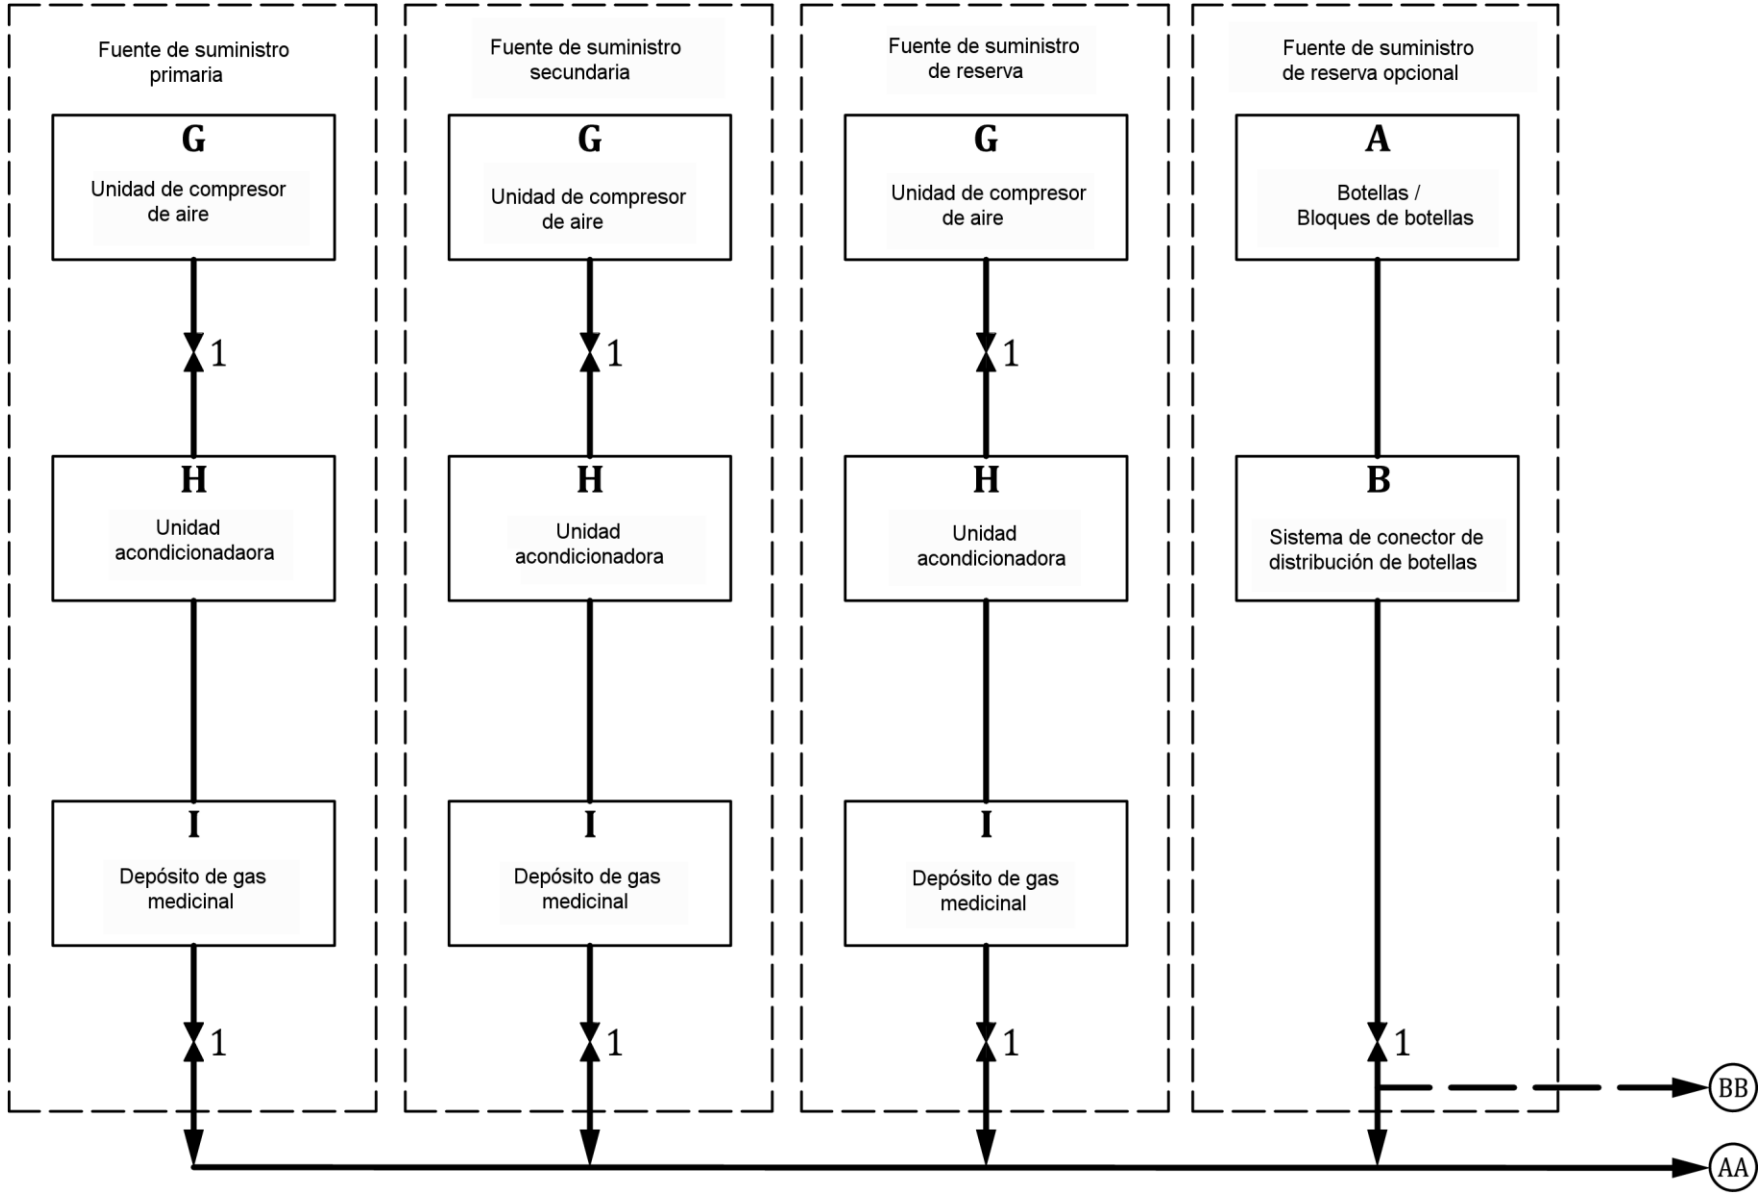

Figura A.8 – Sistema de suministro de aire para uso médico que comprende: Tres unidades de compresor de aire para uso médico; tres unidades acondicionadoras / depósitos de aire para uso médico; una botella / sistema de conector de distribución de bloque de botellas opcional

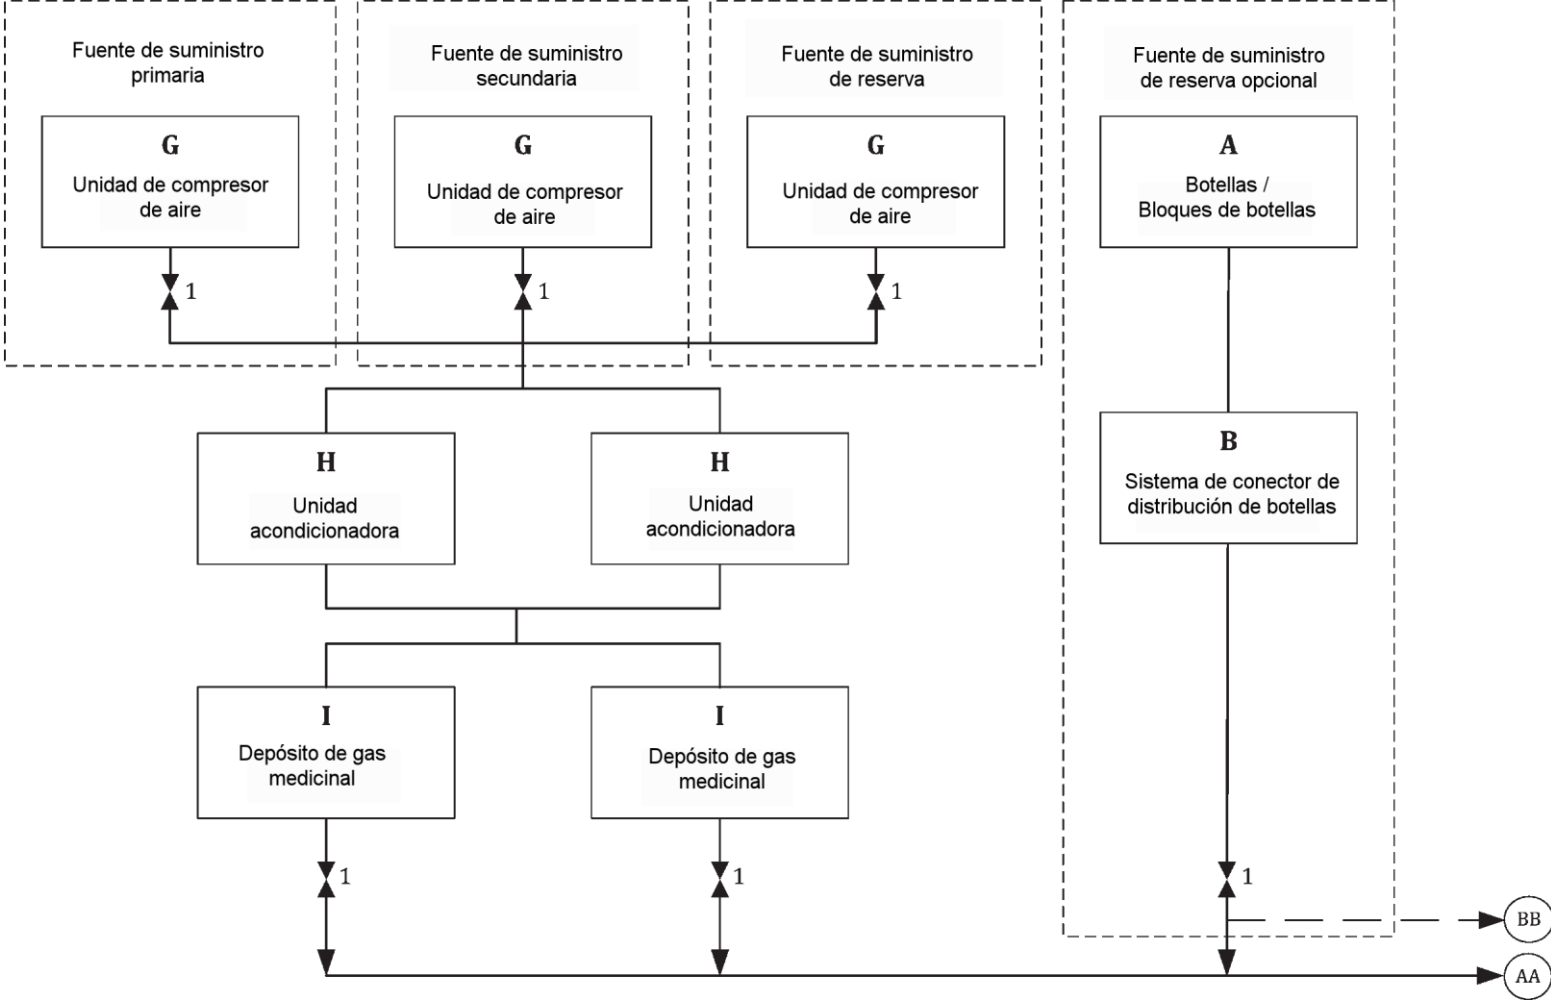

**Figura A.9 – Sistema de suministro de aire para uso médico (disposición alternativa) que comprende: Tres unidades de compresor de aire para uso médico; dos unidades / depósitos acondicionadores de aire para uso médico; una botella / sistema de conector de distribución de bloque de botellas opcional**

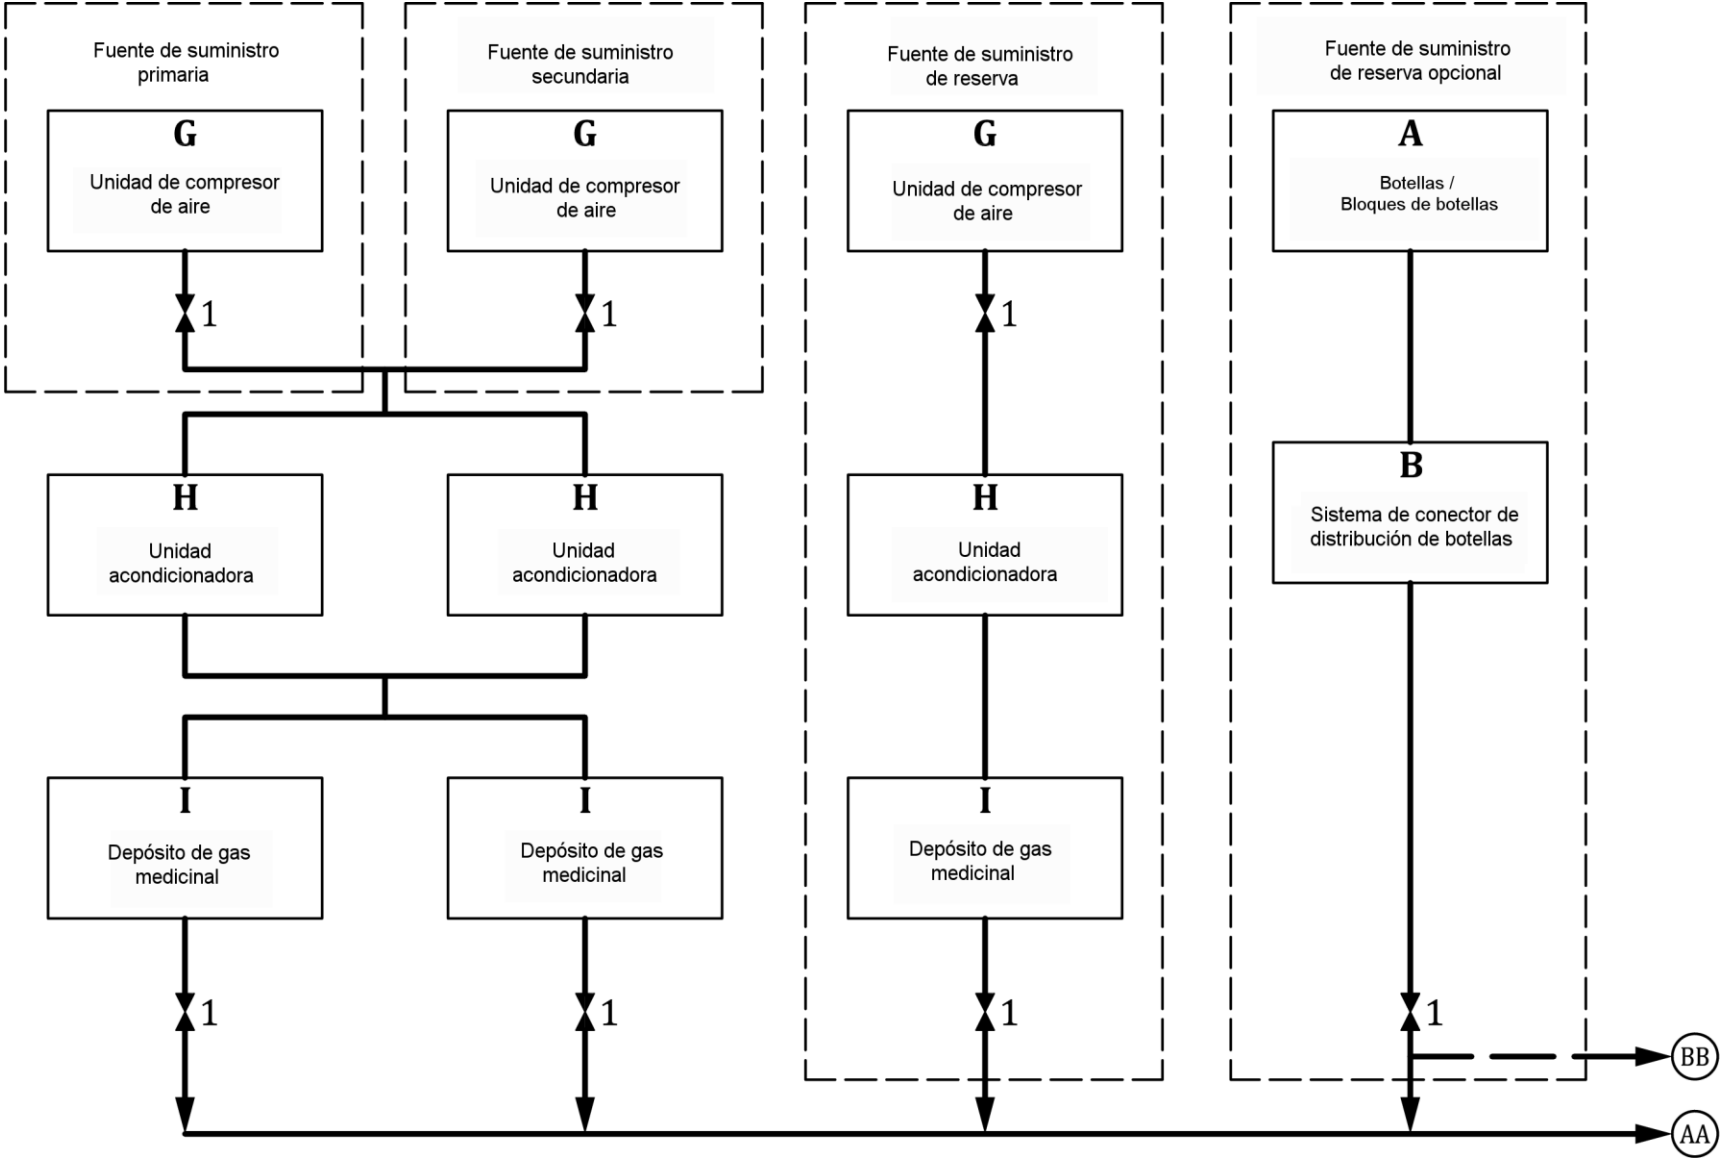

**Figura A.10 – Sistema de suministro de aire para uso médico (disposición alternativa) que comprende: Tres unidades de compresor de aire para uso médico; tres unidades / depósitos acondicionadores de aire para uso médico; una botella / sistema de conector de distribución de bloque de botellas opcional**

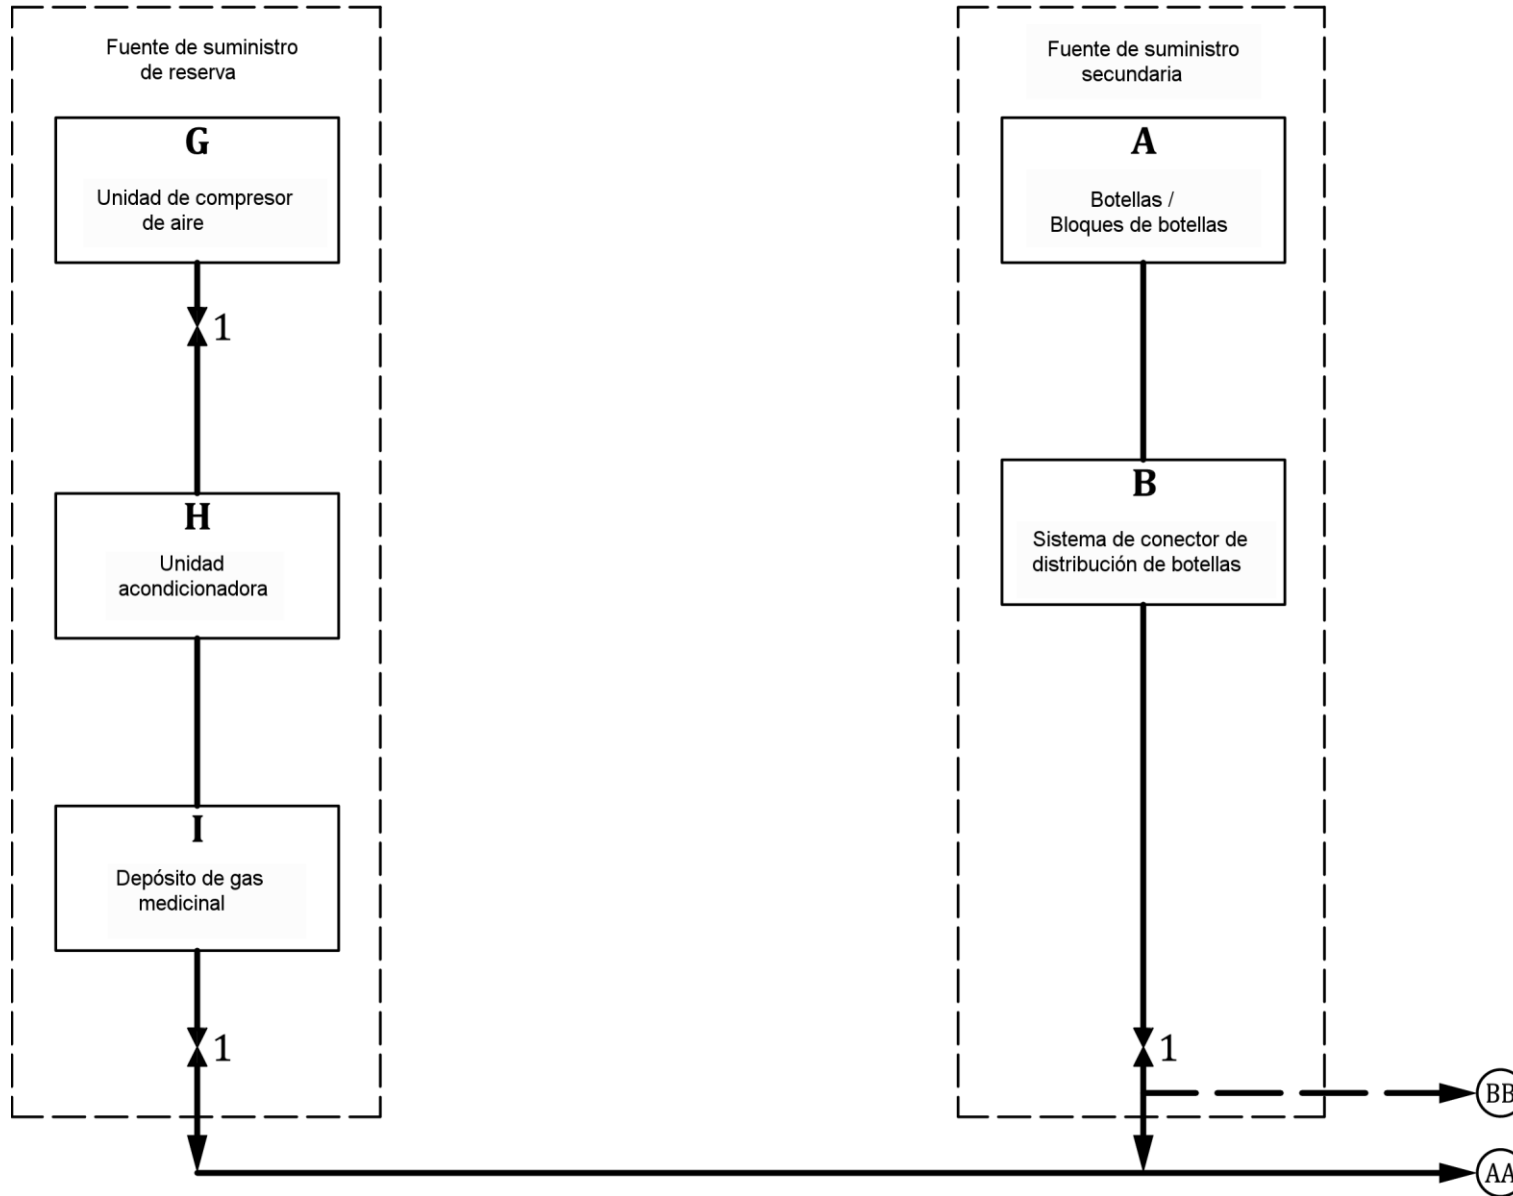

**Figura A.11 – Sistema de suministro de aire motriz para instrumentos quirúrgicos que comprende: Una unidad de compresor de aire; una unidad (depósito) acondicionador de aire; una botella / sistema de conector de distribución de bloque de botellas**

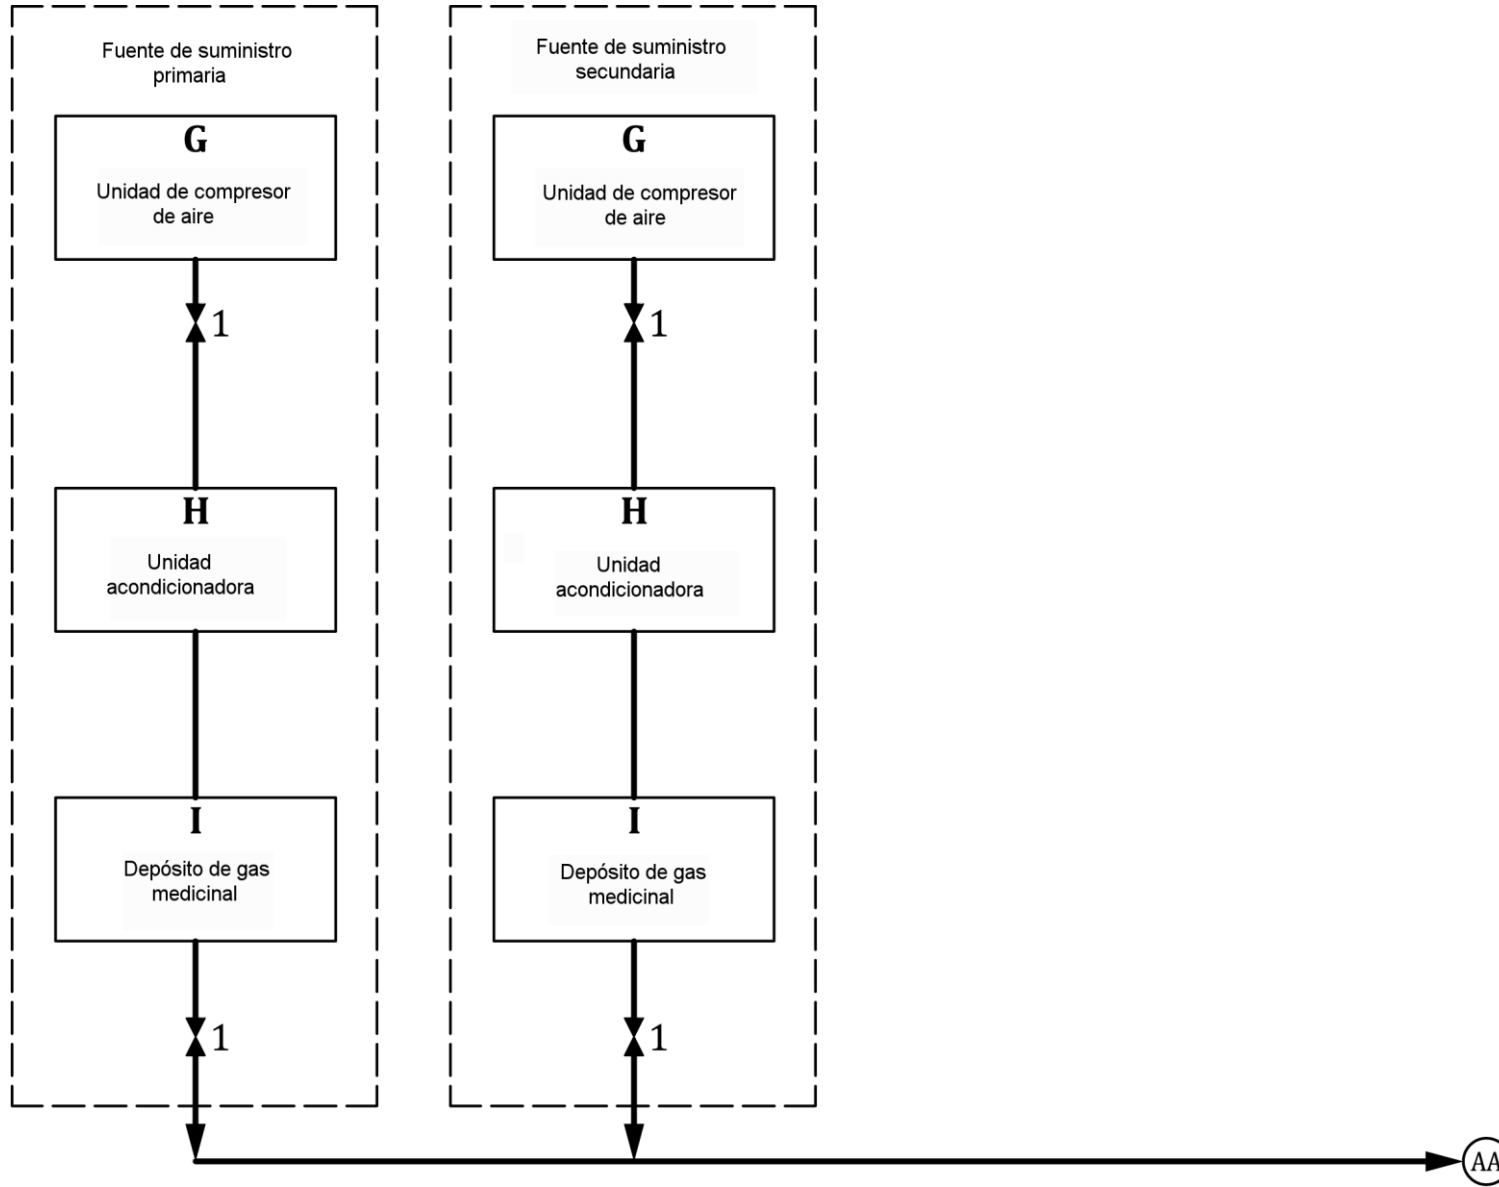

**Figura A.12 – Sistema de suministro de aire motriz para instrumentos quirúrgicos que comprende: Dos unidades de compresor de aire; dos unidades / depósitos acondicionadores de aire**

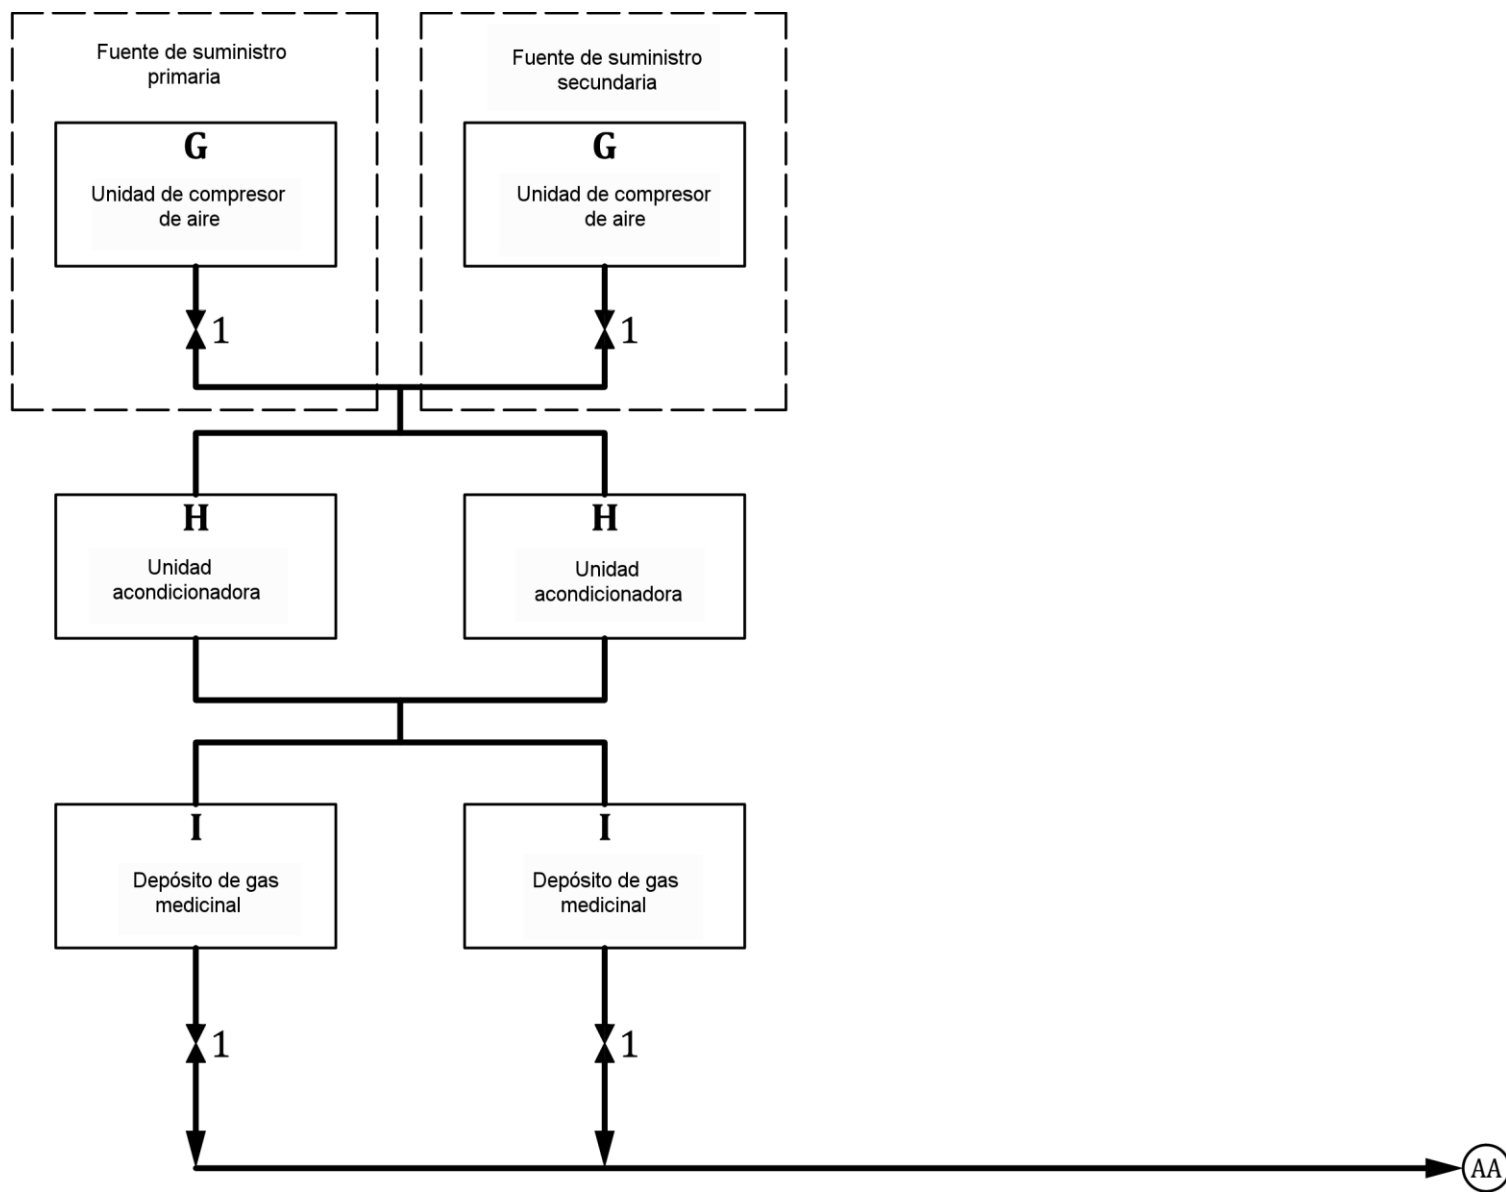

**Figura A.13 – Sistema de suministro de aire motriz para instrumentos quirúrgicos (disposición alternativa) que comprende:  
Dos unidades de compresor de aire; dos unidades / depósitos acondicionadores de aire**

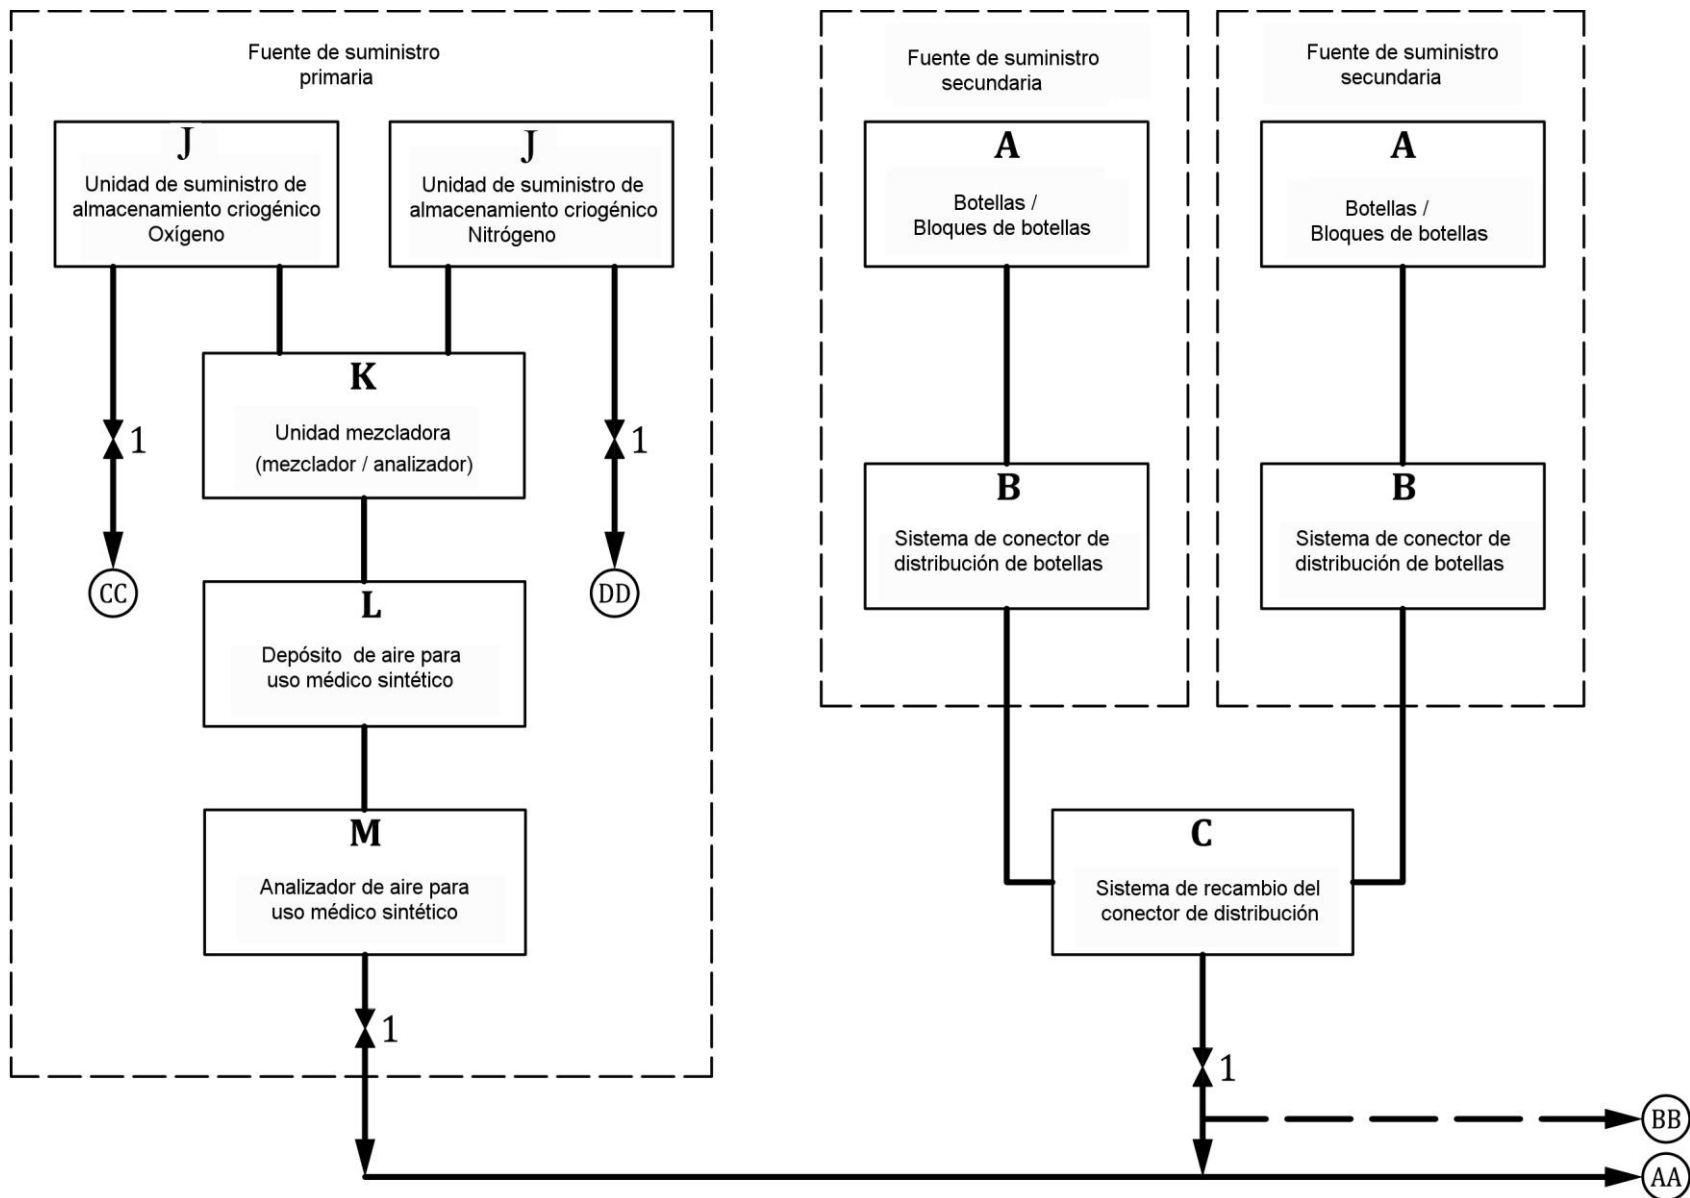

Figura A.14 – Sistema de suministro de aire para uso médico sintético que comprende: Una unidad mezcladora; dos botellas / sistemas de conector de conector de distribución de bloques de botellas y un sistema de recambio del conector de distribución

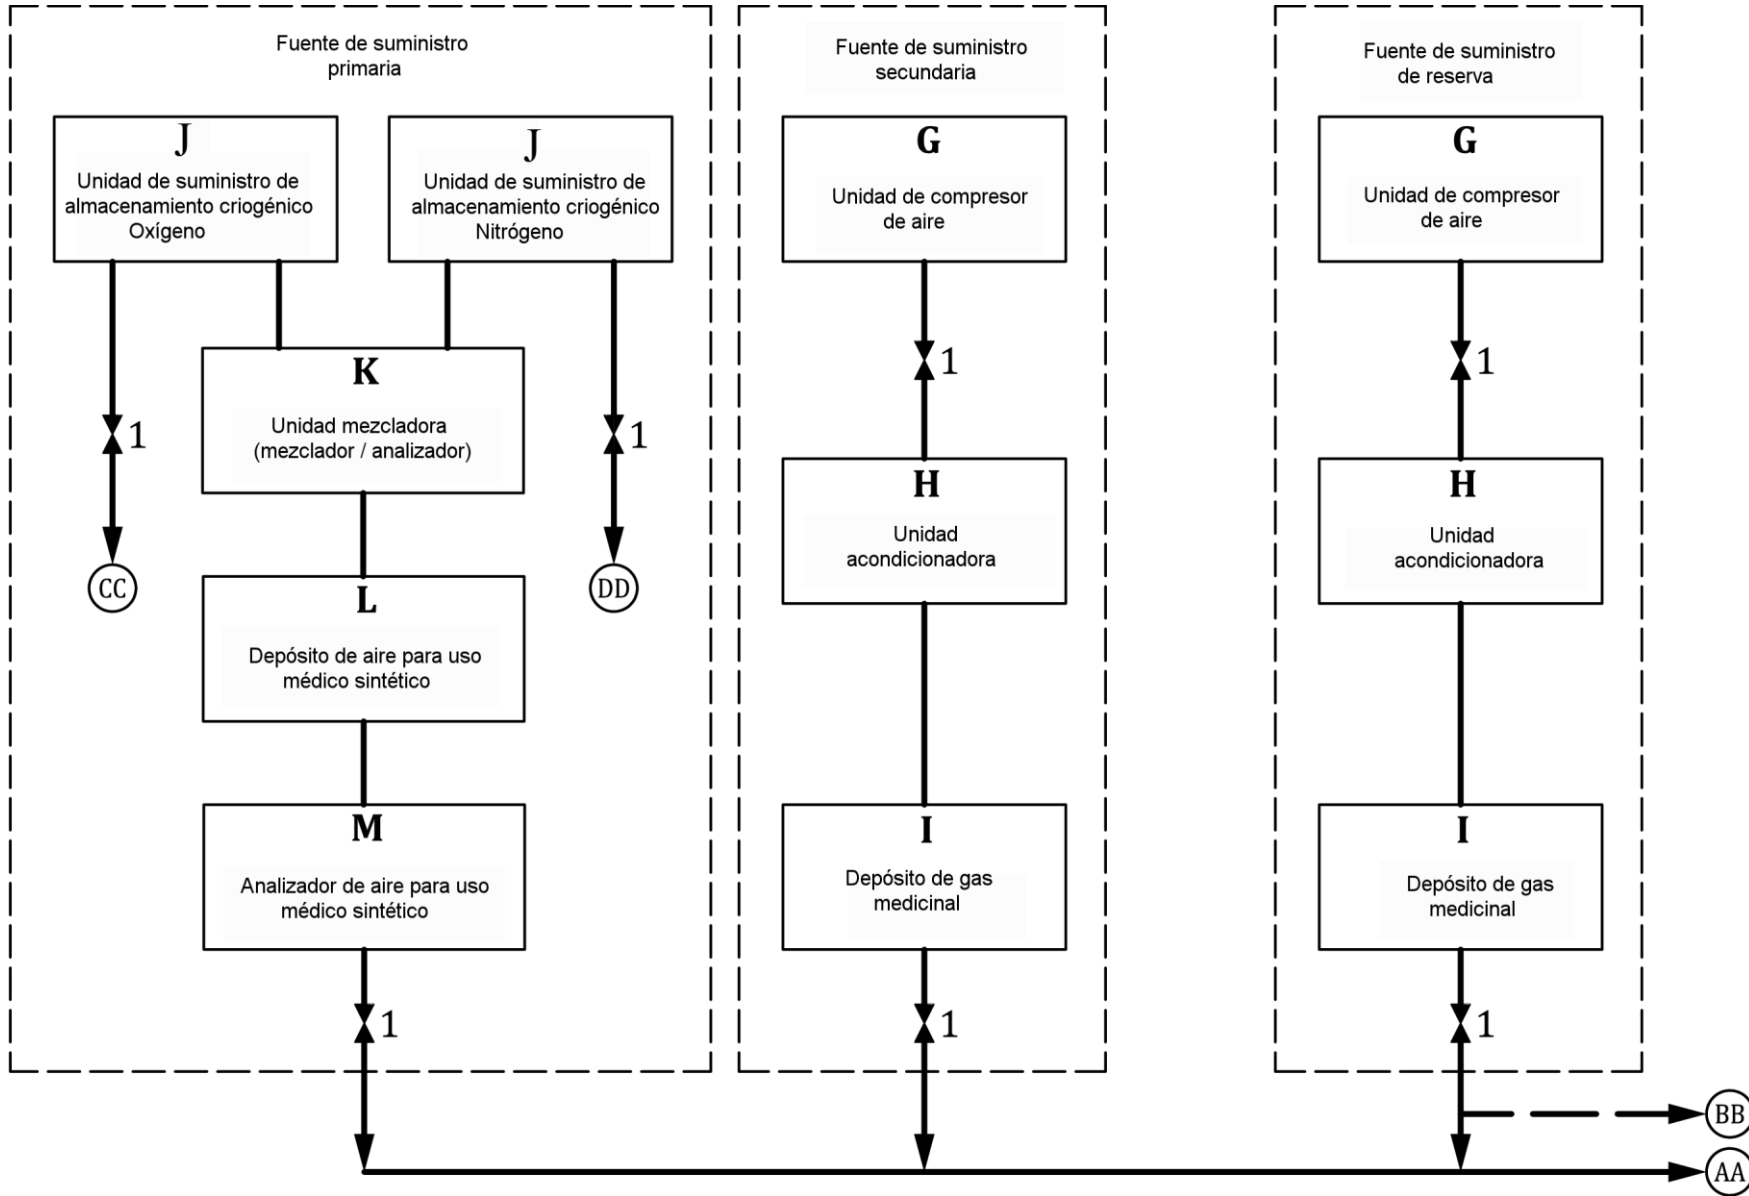

Figura A.15 – Sistema de suministro de aire para uso médico sintético que comprende: Una unidad mezcladora; dos unidades de compresor de aire para uso médico; dos unidades / depósitos acondicionadores de aire para uso médico



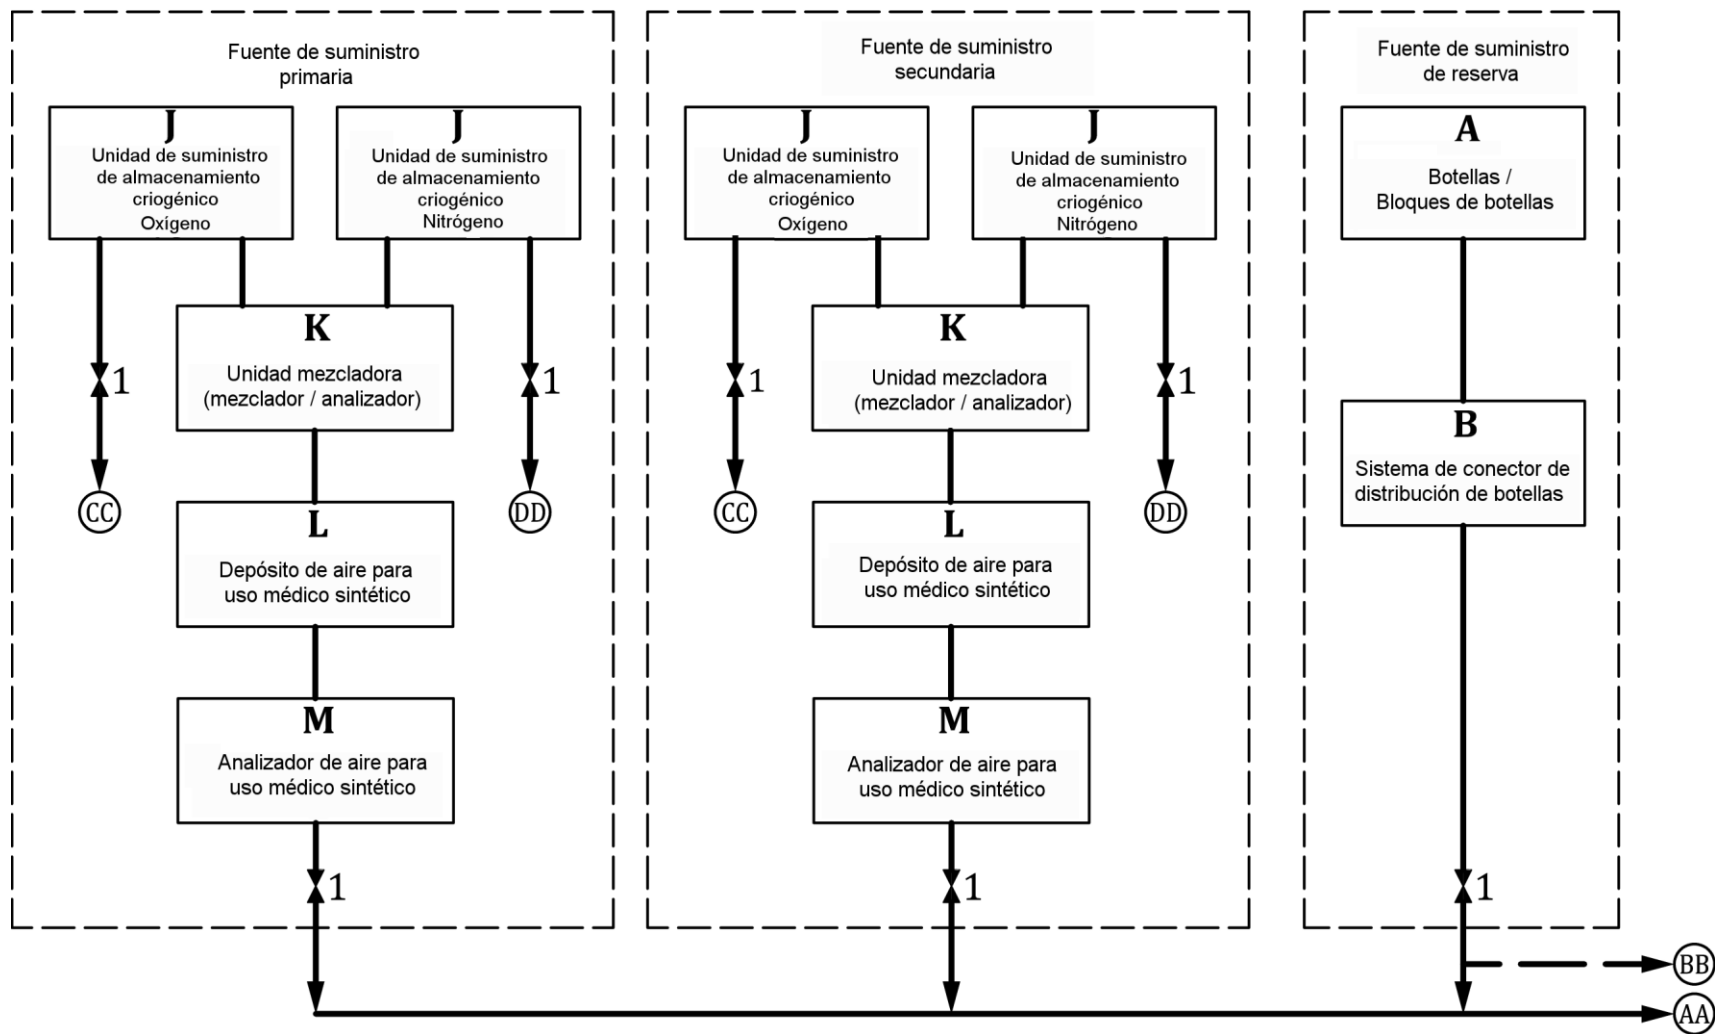

**Figura A.16 – Sistema de suministro de aire para uso médico sintético que comprende: Dos unidades mezcladoras; una botella / sistema de conector de distribución de bloque de botellas**

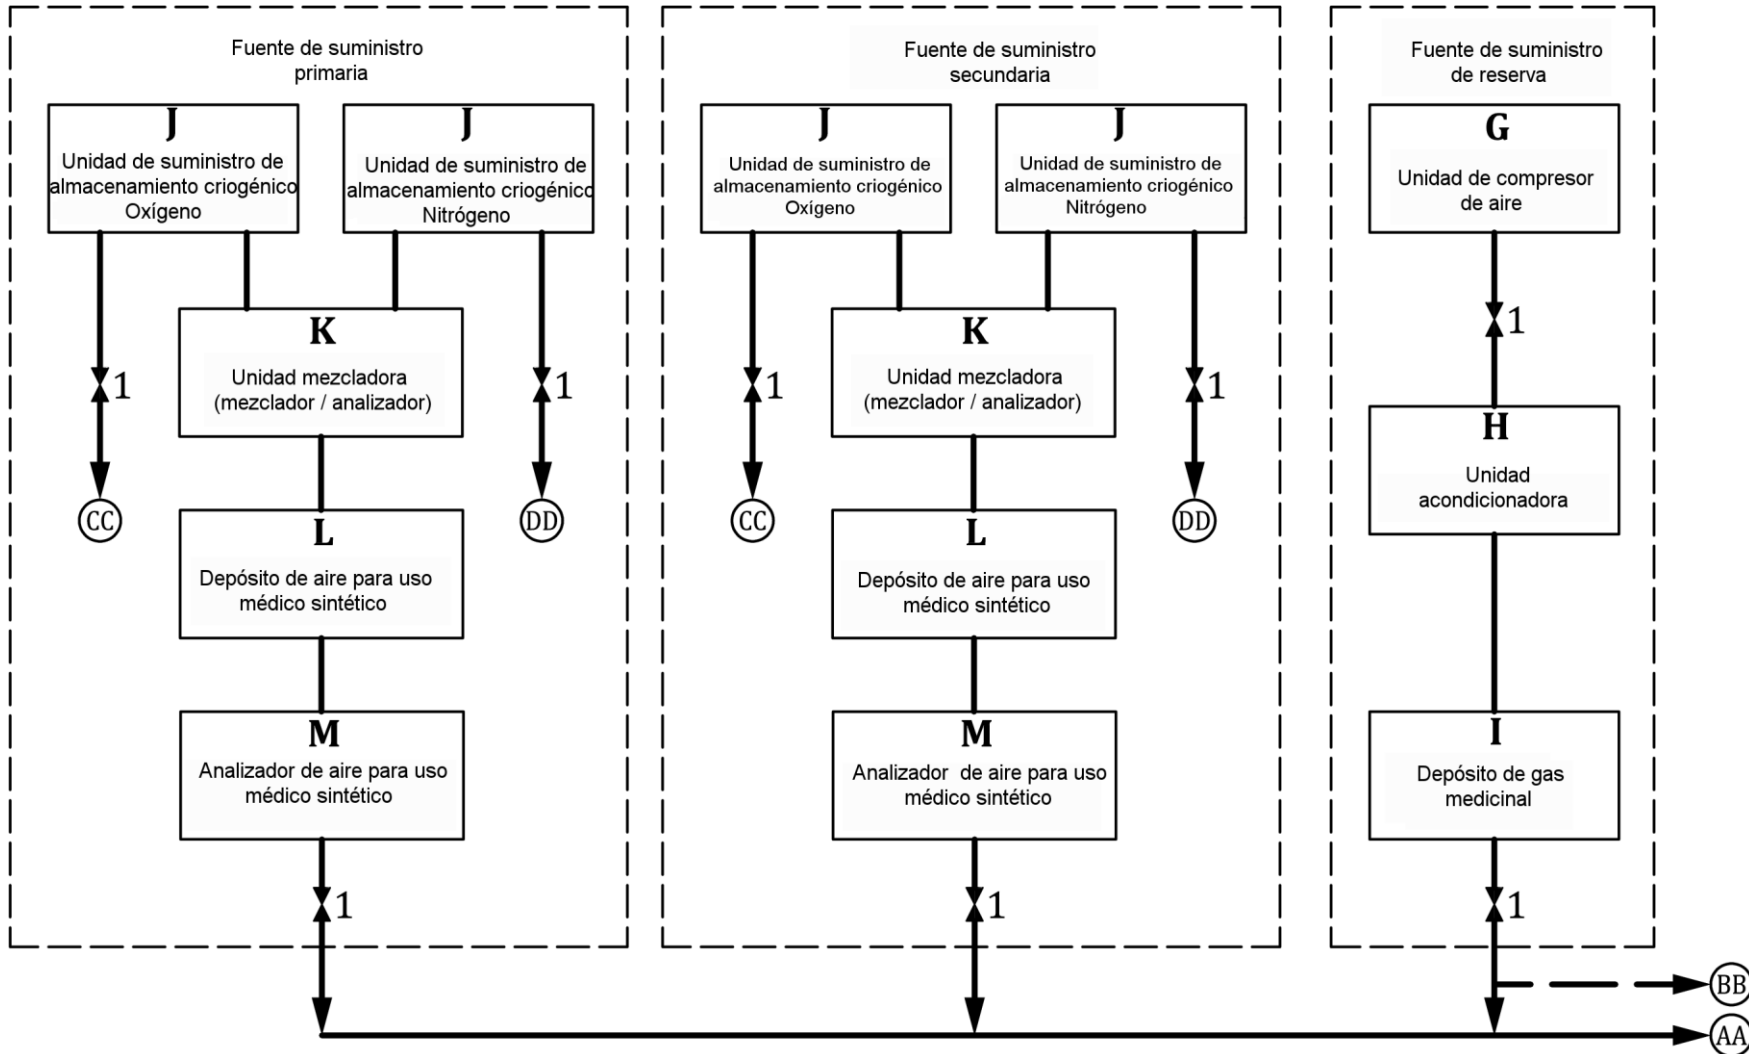

**Figura A.17 – Sistema de suministro de aire para uso médico sintético que comprende: Dos unidades mezcladoras; una unidad / depósito acondicionador de aire para uso médico**

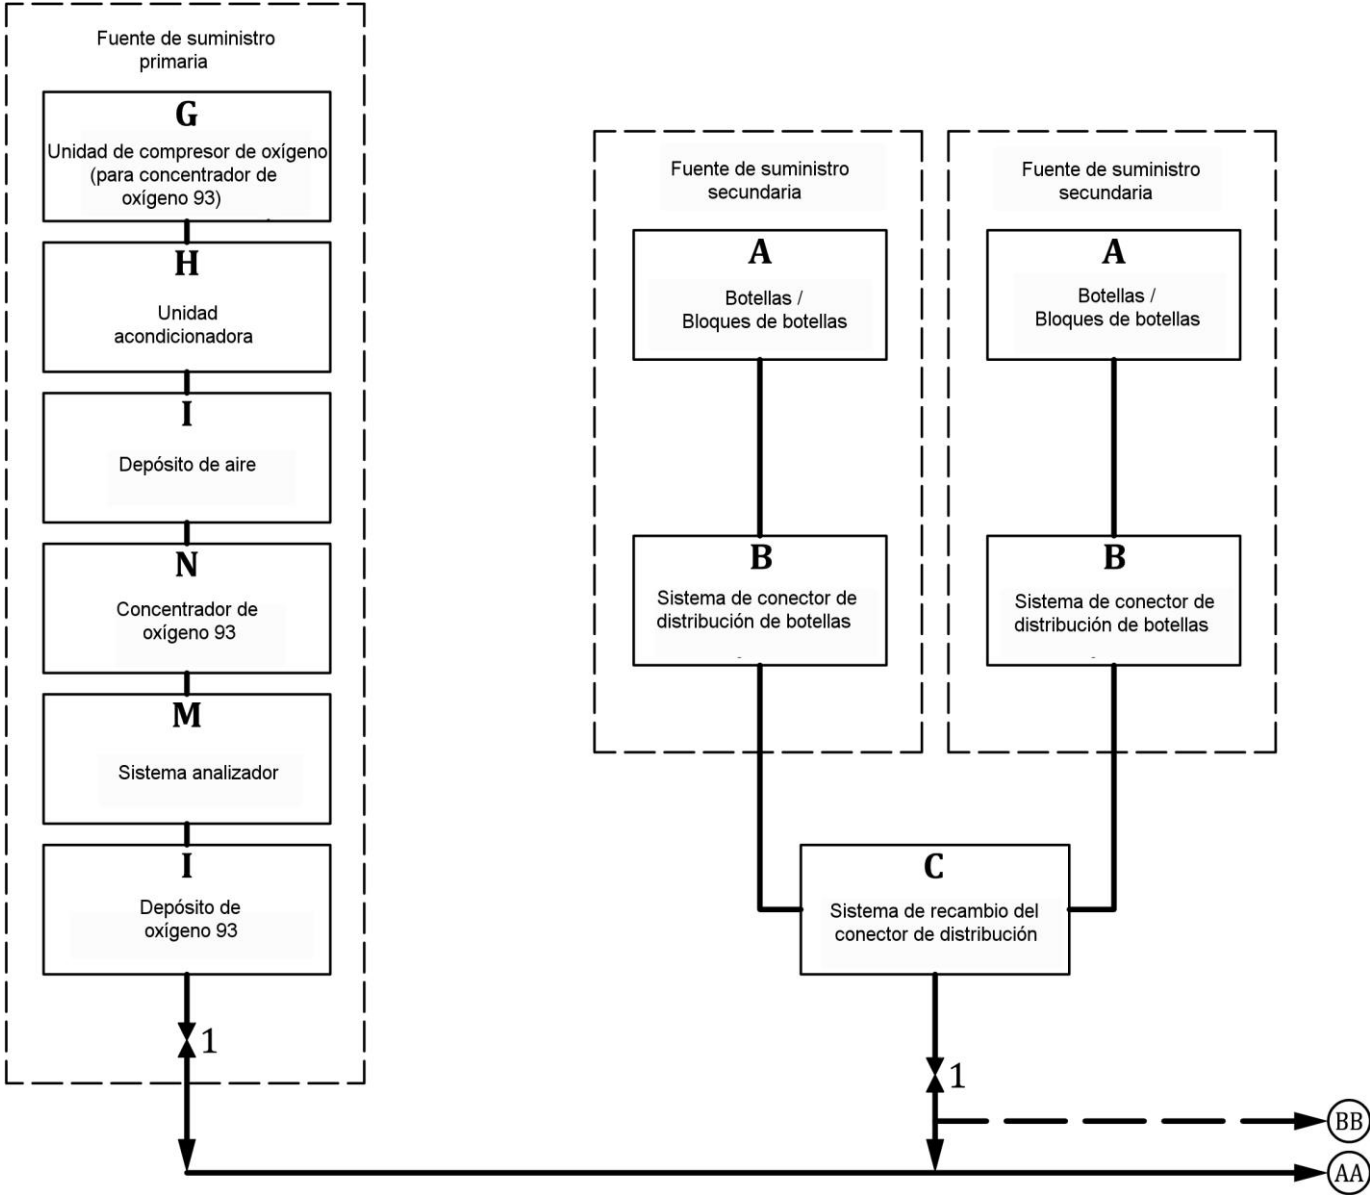

**Figura A.18 – Sistema de suministro de oxígeno 93 que comprende: Una unidad concentradora de oxígeno 93; dos botellas / sistemas de conector de distribución de bloque de botellas y un sistema de recambio del conector de distribución**

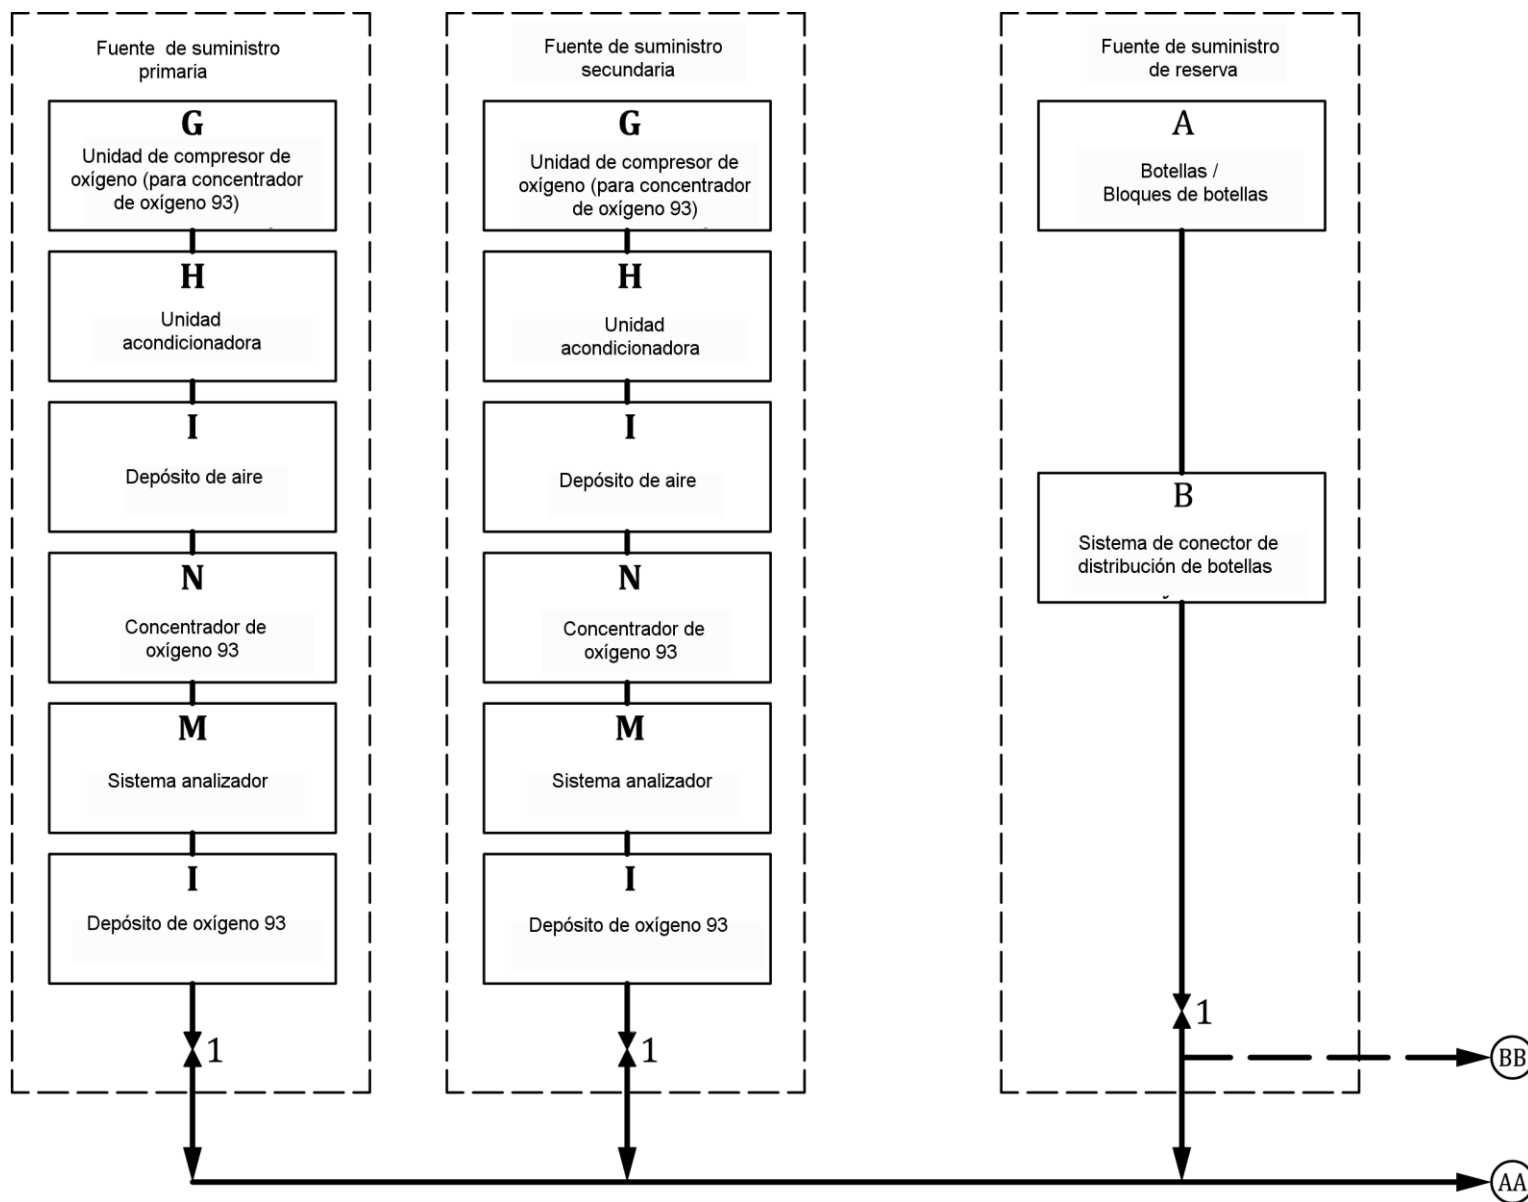

**Figura A.19 – Sistema de suministro de oxígeno 93 que comprende: Dos unidades concentradoras de oxígeno 93; una botella / sistema de conector de distribución de bloque de botellas**

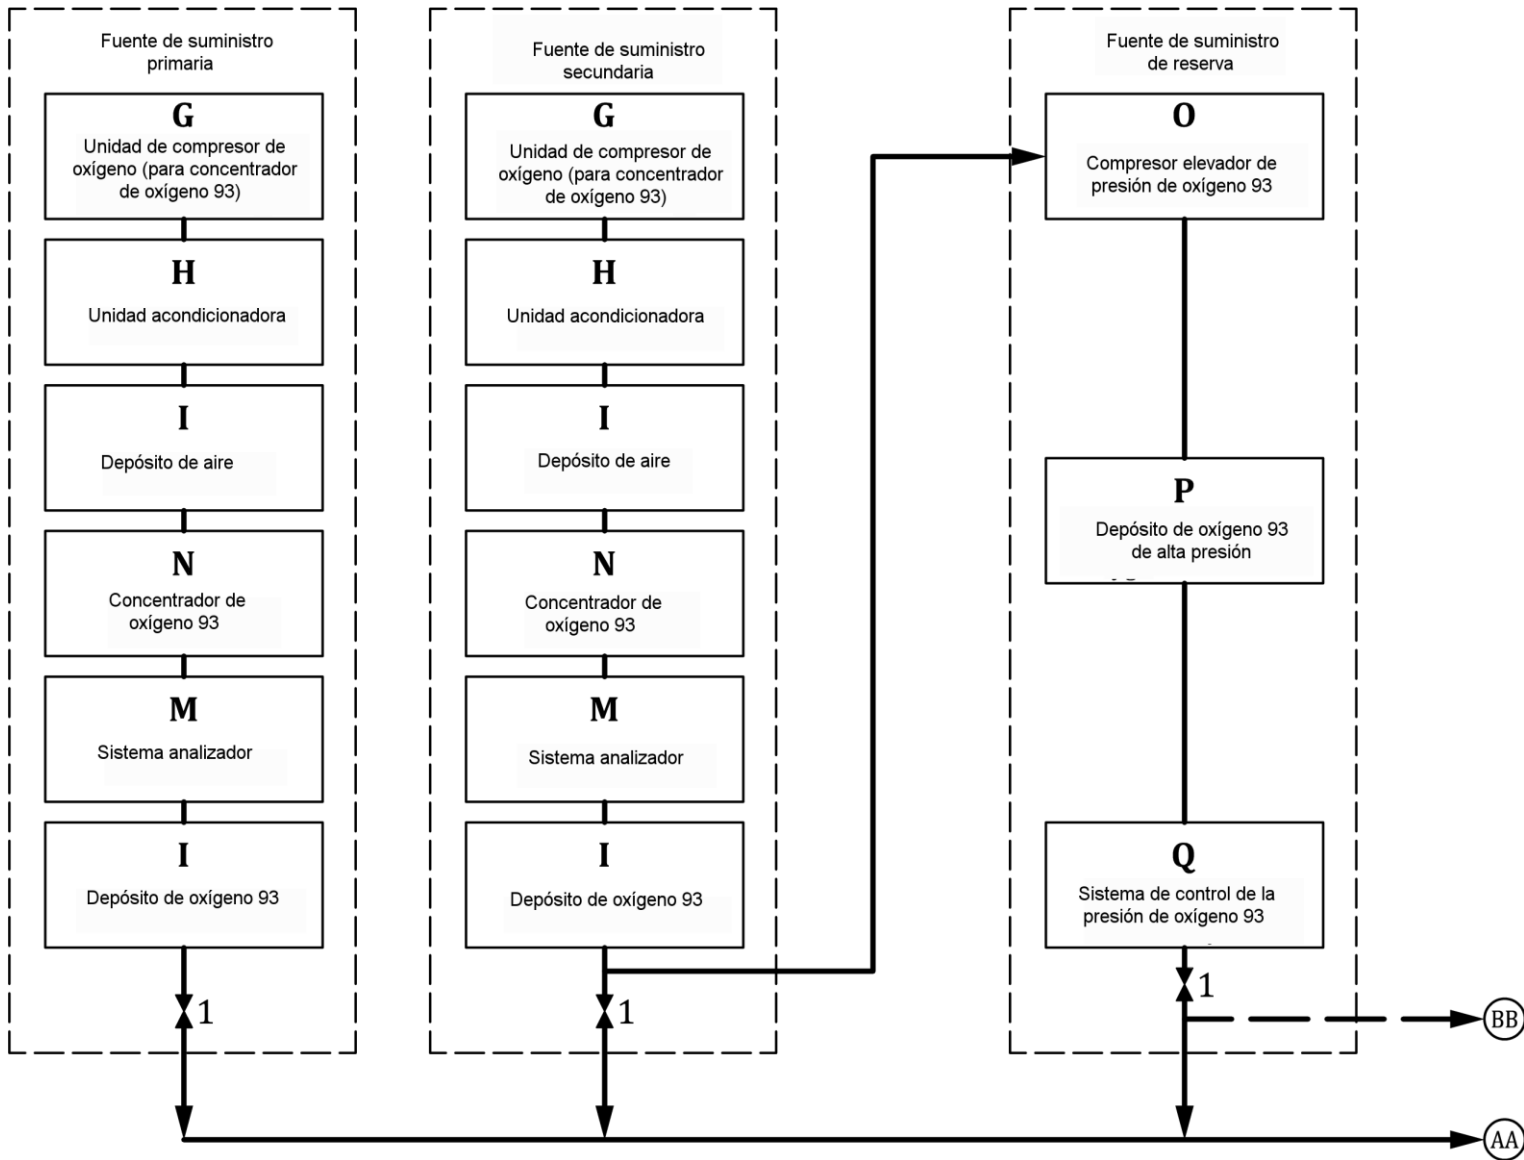

**Figura A.20 – Sistema de suministro de oxígeno 93 que comprende: Dos unidades concentradoras de oxígeno 93; un sistema de depósito de oxígeno 93 de alta presión**

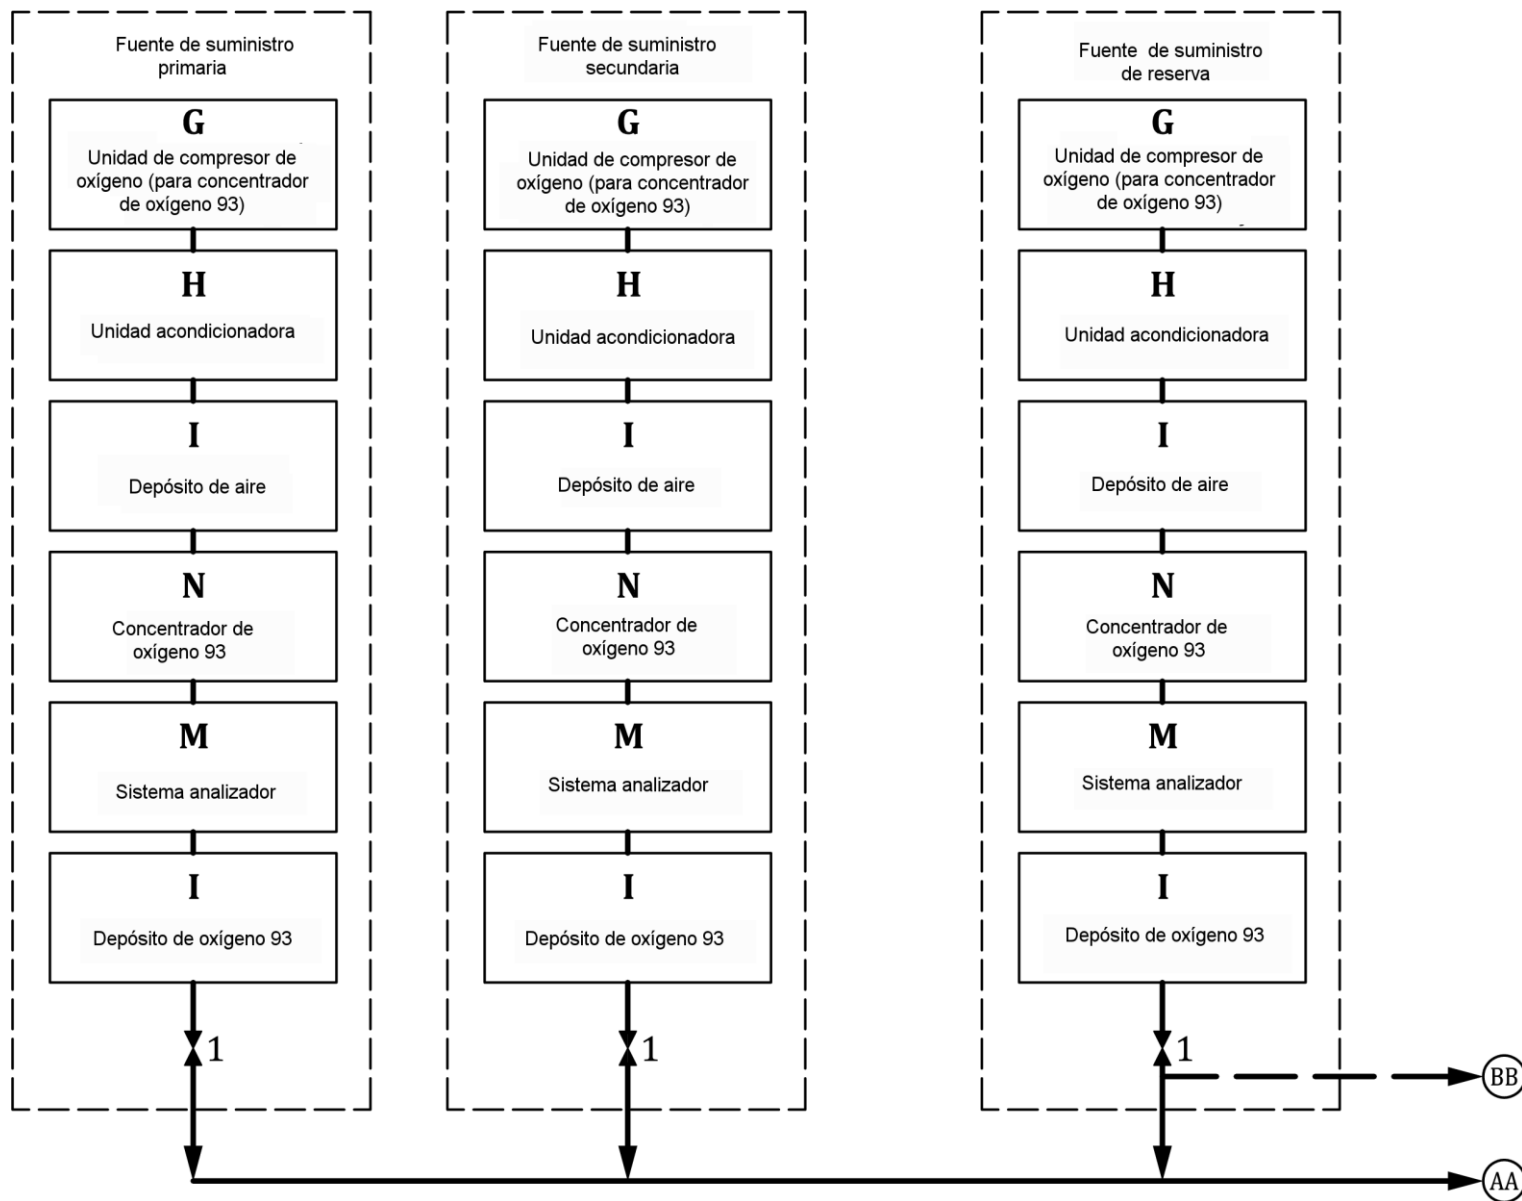

Figura A.21 – Sistema de suministro de oxígeno 93 que comprende: Tres unidades concentradoras de oxígeno 93

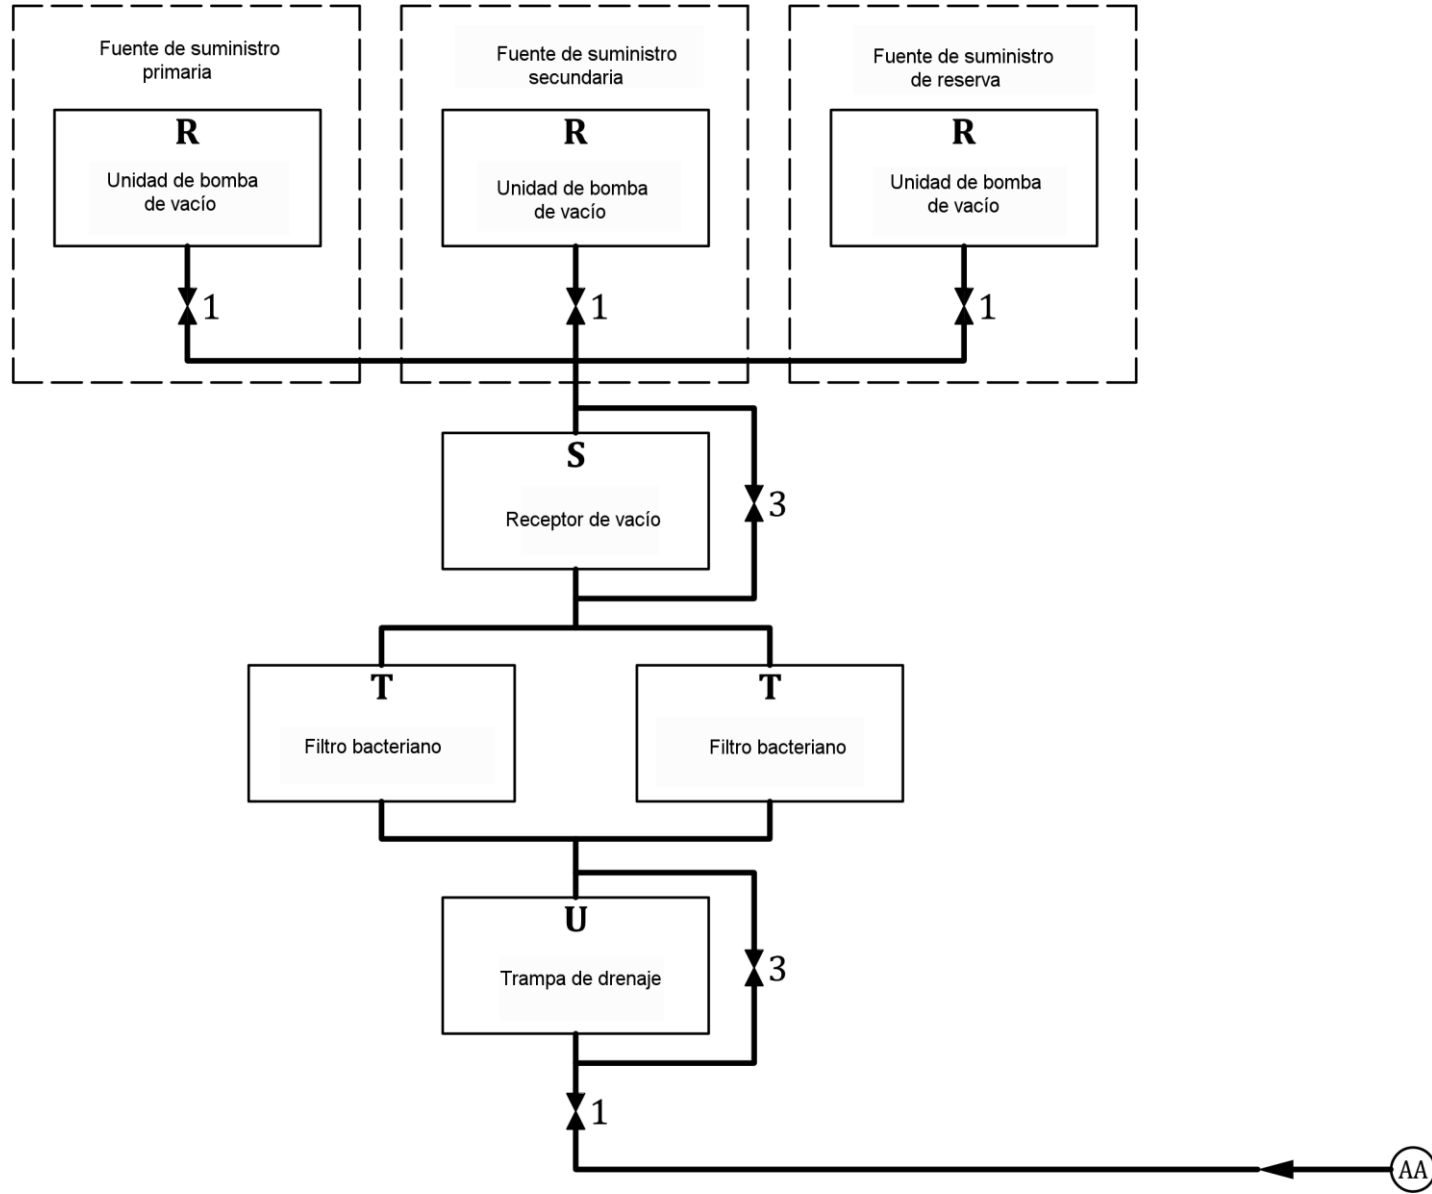

**Figura A.22 – Sistema de suministro de vacío que comprende: Tres unidades de bomba de vacío; un receptor de vacío; dos filtros bacterianos; una trampa de drenaje**

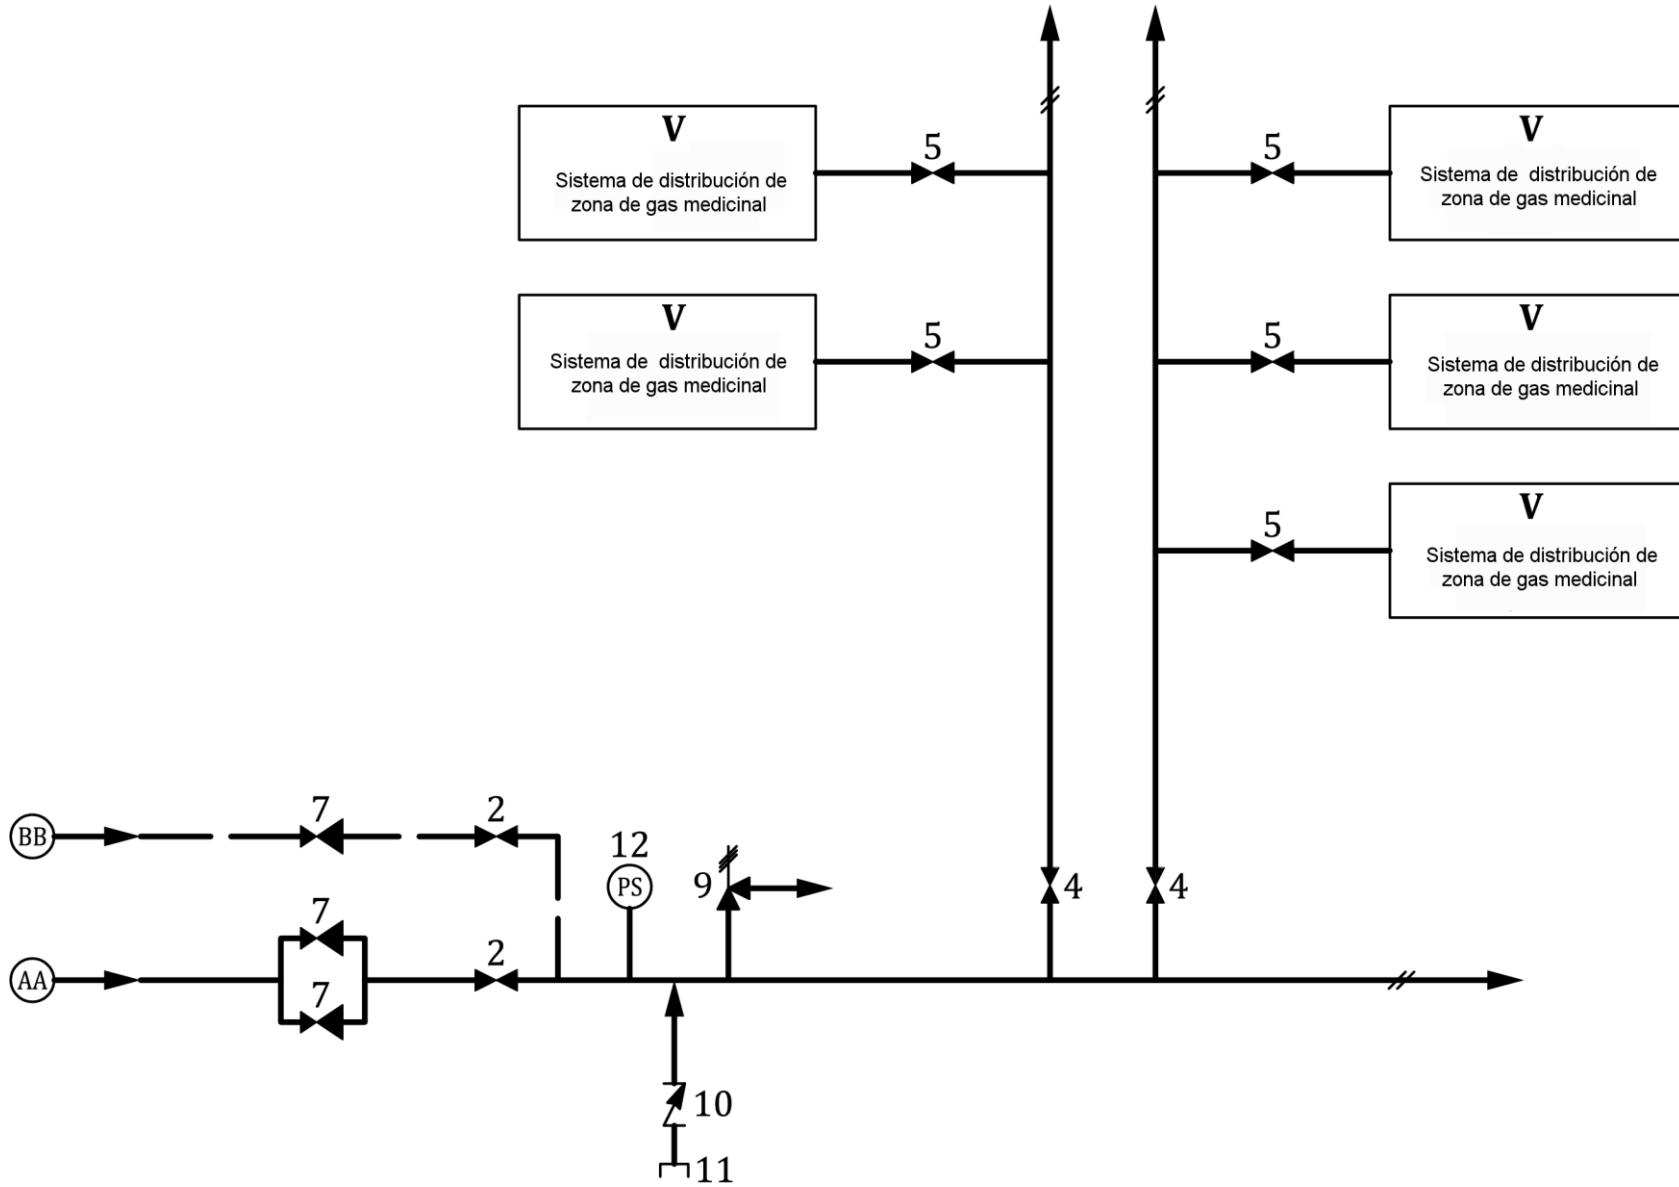

Figura A.23 – Sistema de distribución canalizada de gas medicinal de una sola etapa



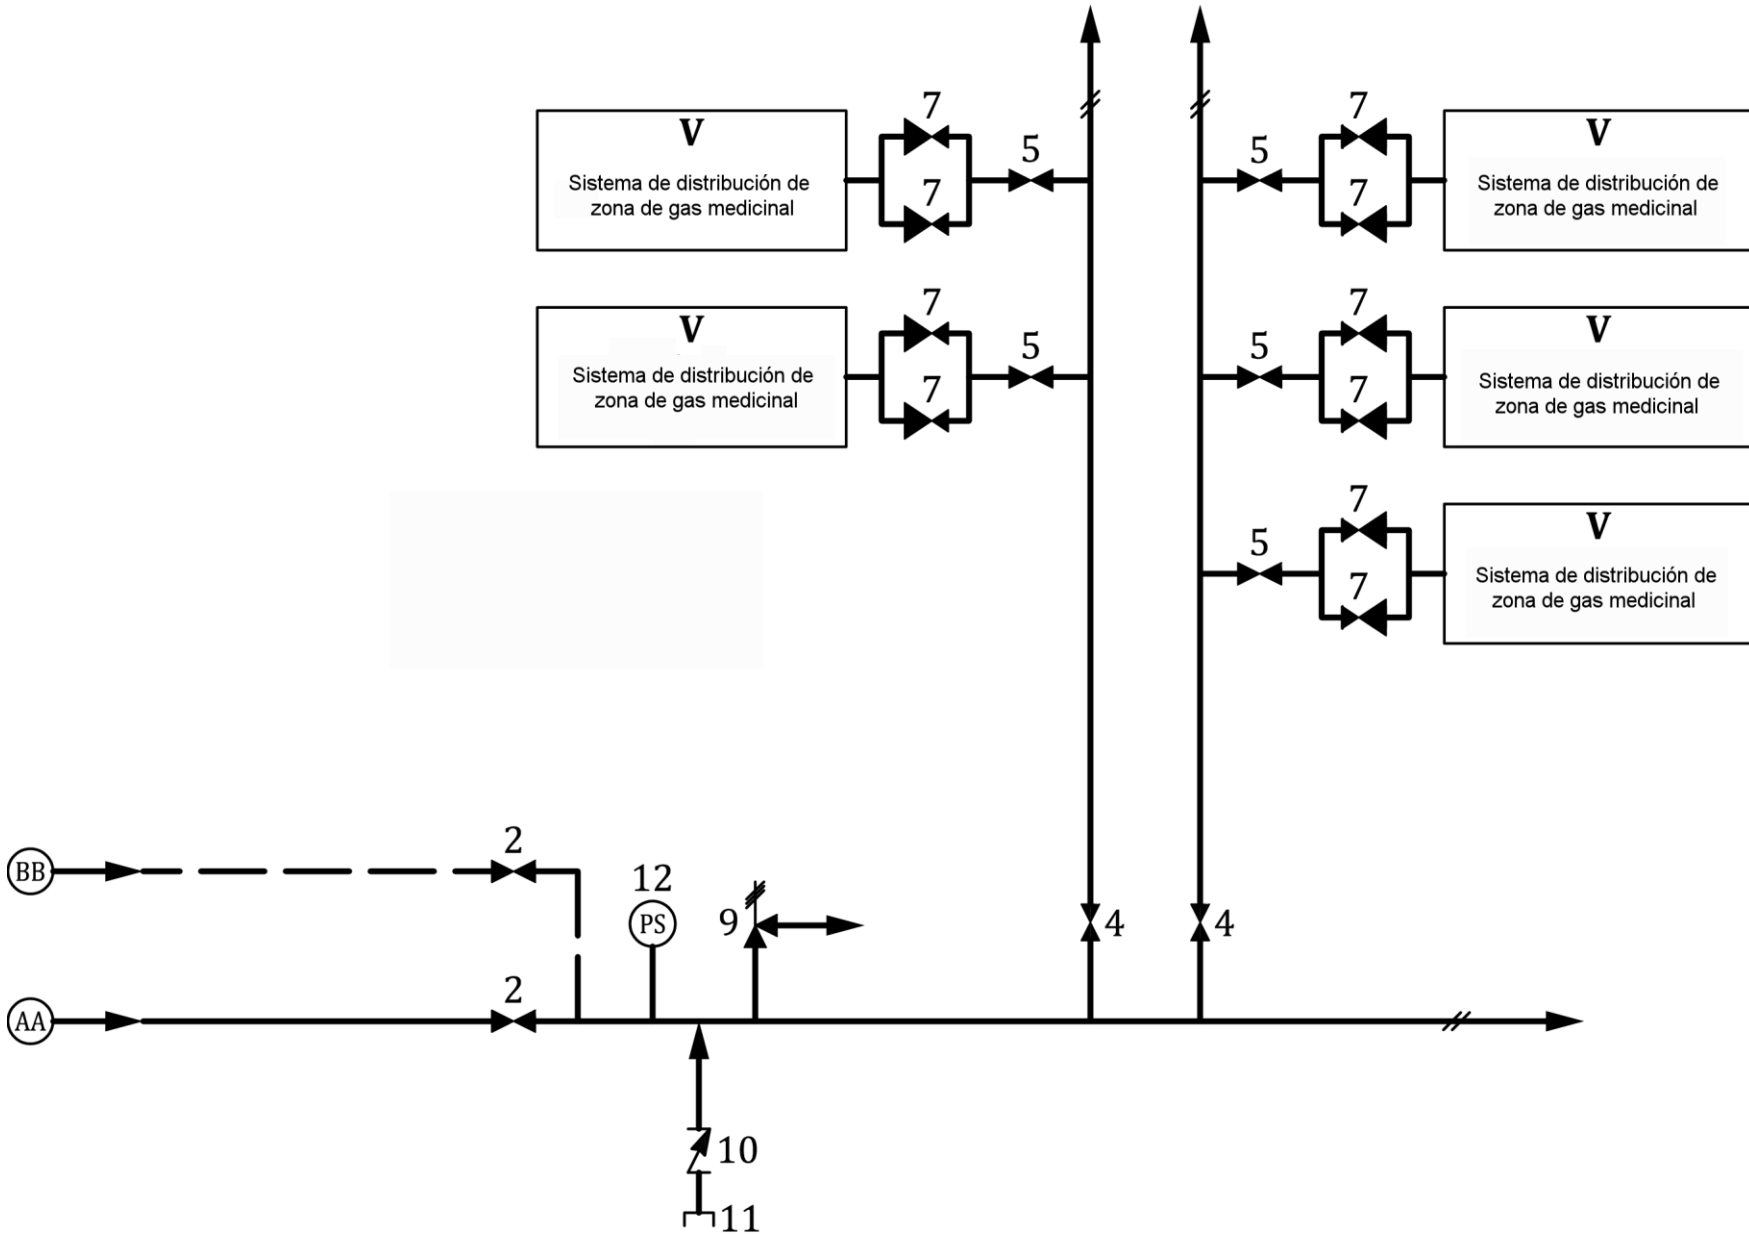

Figura A.24 – Sistema de distribución canalizada de gas medicinal de dos etapas

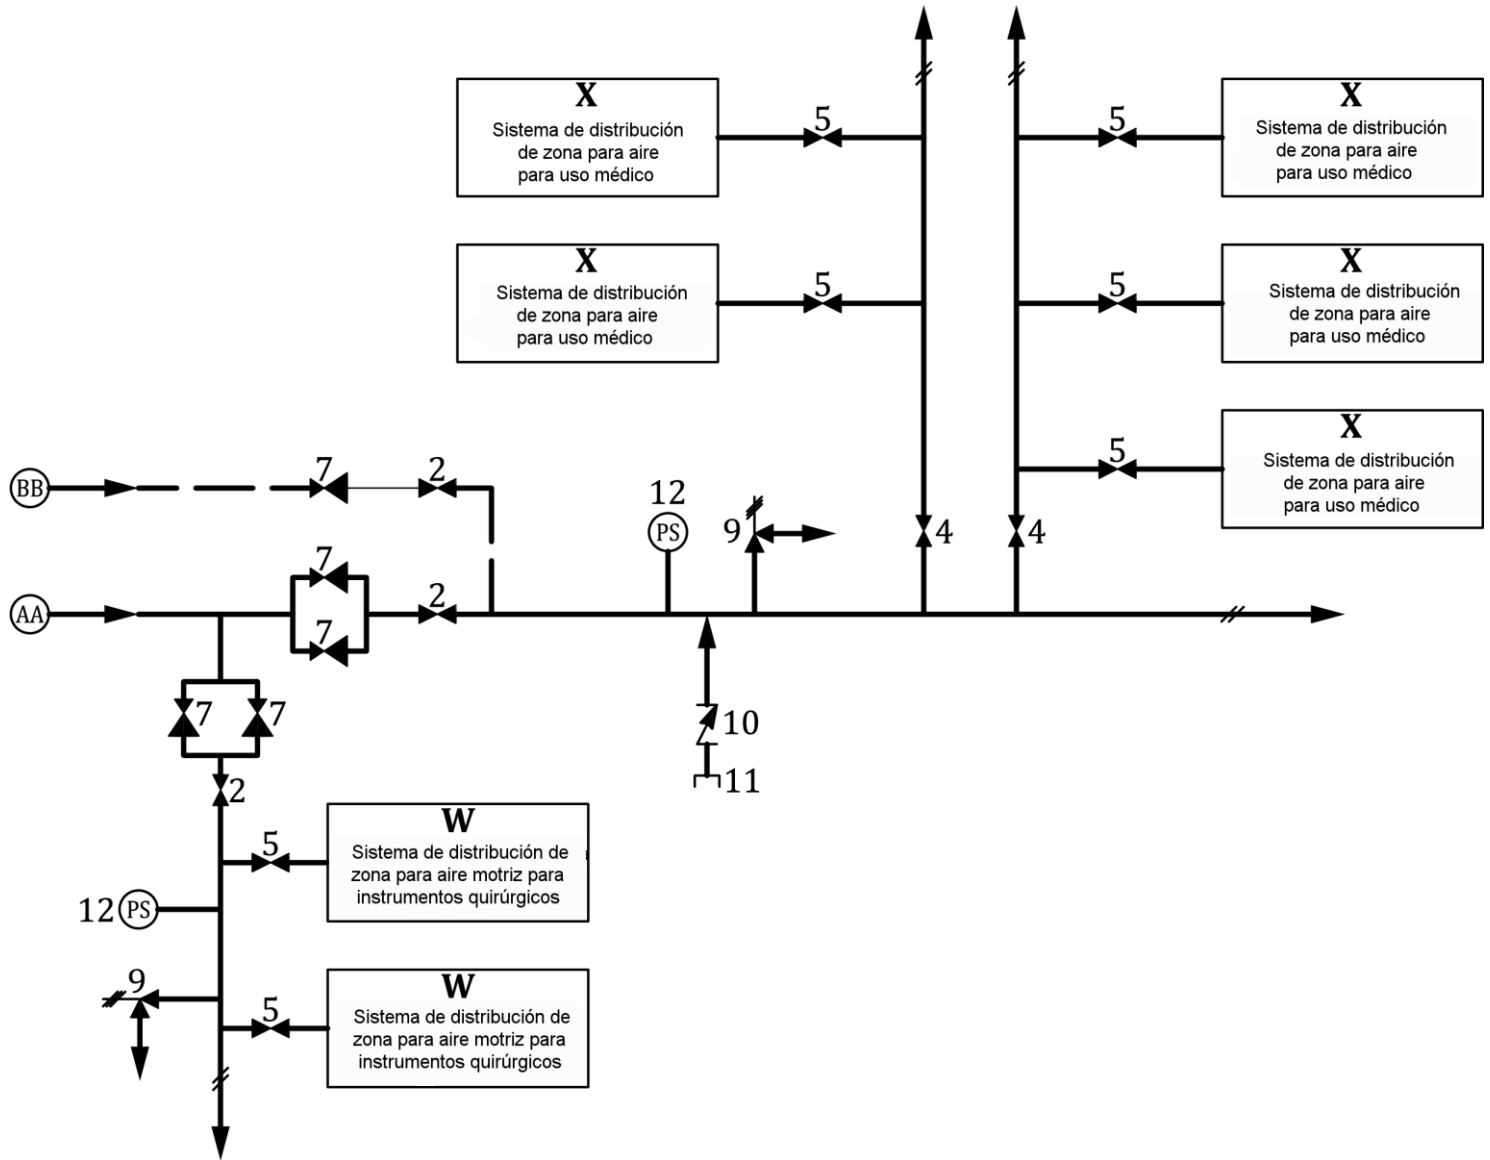

Figura A.25 – Sistema de distribución canalizada de gas medicinal de una sola etapa que incluye un sistema de distribución de aire motriz para instrumentos quirúrgicos

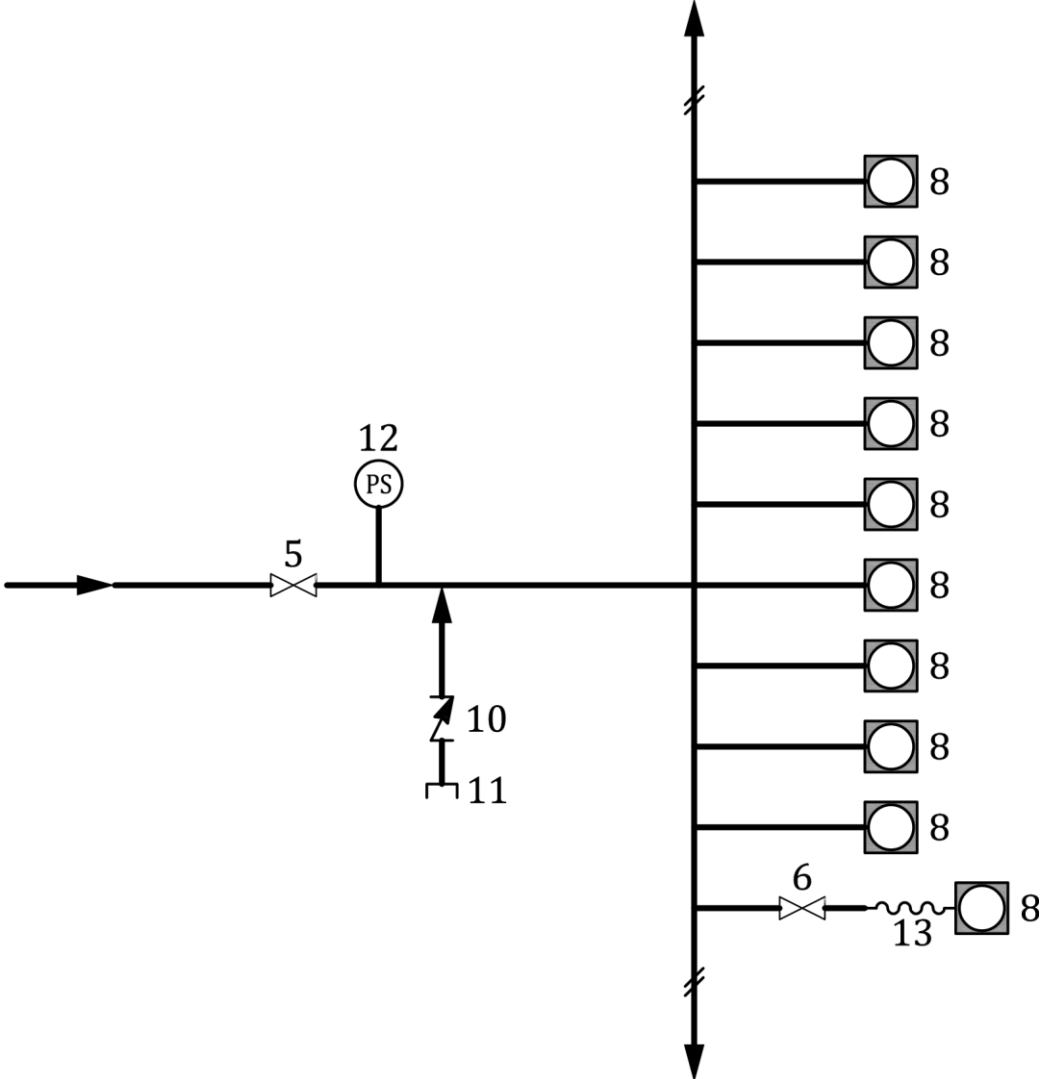

Figura A.26 – Sistema de distribución de zona de gas medicinal

## **Anexo B (Informativo)**

### **Recomendaciones para la ubicación de los conectores de distribución de botellas, zonas de almacenamiento de botellas y recipientes estacionarios para líquidos criogénicos y no criogénicos**

#### **B.1 Ubicación de los conectores de distribución de botellas**

Un sistema de suministro con botellas se debería instalar en una sala bien ventilada y contra incendios que esté construida especialmente o modificada adecuadamente. De forma alternativa, se puede instalar al aire libre bajo cubierta, protegida de la intemperie, y vallando la zona para impedir el acceso de personas no autorizadas.

NOTA Puede existir reglamentación regional o nacional aplicable a la ubicación de los conectores de distribución de botellas.

#### **B.2 Ubicación de las zonas de almacenamiento de botellas**

**B.2.1** Las zonas de almacenamiento de botellas deberían ser bien ventiladas y contra incendios. Si están situadas al aire libre, deberían estar bajo cubierta y protegidas de la intemperie. Las zonas de almacenamiento de botellas deberían estar valladas para impedir el acceso de personas no autorizadas.

**B.2.2** Se debería proporcionar un acceso para vehículos apropiado para la descarga y manipulación seguras de botellas.

NOTA Puede existir reglamentación regional o nacional aplicable a las zonas de almacenamiento de botellas.

#### **B.3 Ubicación de recipientes estacionarios**

**B.3.1** Los recipientes estacionarios que contienen líquidos criogénicos o no criogénicos no se deberían instalar sobre estructuras subterráneas tales como refugios bajo tierra, sótanos, etc., y deberían estar separadas más de 5 m de aberturas de fosos, estructuras subterráneas, agujeros de hombre, barrancos o trampas, y al menos a 5 m de las rutas de acceso para el público.

NOTA Puede existir reglamentación regional o nacional aplicable a la ubicación de recipientes criogénicos o no criogénicos estacionarios.

**B.3.2** Los recipientes estacionarios que contienen líquidos criogénicos o no criogénicos se deberían instalar en una posición que esté abierta al aire libre y a nivel del suelo, no en la azotea de un edificio. El equipo de control se debería proteger de la intemperie y la zona se debería vallar para impedir el acceso de personas no autorizadas.

**B.3.3** Se debería proporcionar un acceso adecuado para un vehículo de forma que se pueda llenar un recipiente de suministro de líquido criogénico o no criogénico. El suelo en la vecindad inmediata de un punto de llenado de oxígeno o óxido nitroso debería ser de cemento u otro material no combustible.

**B.3.4** Los puntos de escape posible de gas desde los medios de liberación de sobrepresión deberían estar separados más de 5 m de las zonas de acceso para el público.

## **Anexo C (Informativo)**

### **Ejemplo de procedimiento para el ensayo y la puesta en servicio**

#### **C.1 Generalidades**

Este procedimiento de ensayo se da como un ejemplo de cómo se pueden verificar las especificaciones del capítulo 12 para que el sistema se pueda poner en servicio y certificar. Se pueden idear otros procedimientos que ensayen de forma válida estas especificaciones. En este procedimiento, es importante y se debería seguir la secuencia dada de los ensayos. Se deberían seguir los requisitos generales de los apartados 12.1 y 12.2. Cuando los resultados de un ensayo no cumplen los criterios de éxito del mismo, se debe efectuar trabajo correctivo y repetir los ensayos previos según sea necesario.

Se debería comprobar la exactitud del equipo de ensayo antes de comenzar cada procedimiento de ensayo.

Los impresos típicos para la certificación del sistema se dan en el anexo D. Los resúmenes de los ensayos típicos requeridos que enumeran la especificación, el procedimiento y la forma para cada ensayo se dan en los impresos D.1.1 y D.1.2.

#### **C.2 Inspecciones antes de la ocultación (véase 12.3)**

##### **C.2.1 Inspección del marcado y de los soportes de la canalización (véase 12.5.1)**

###### **C.2.1.1 Generalidades**

Se inspecciona visualmente que el marcado se ha colocado correctamente en todas las canalizaciones, especialmente las adyacentes a las conexiones en T y donde las canalizaciones pasan a través de pisos o tabiques. El marcado debería ser conforme con el apartado 10.1. Se comprueban los soportes de la canalización. Los soportes de la canalización deberían ser conformes con el apartado 11.2.

###### **C.2.1.2 Resultados del ensayo**

Los resultados se registran en el impreso D.2.

##### **C.2.2 Comprobación de la conformidad con las especificaciones del diseño (véase 12.5.2)**

###### **C.2.2.1 Condiciones generales**

Ninguna canalización debería estar oculta.

###### **C.2.2.2 Ejemplo de procedimiento**

Se inspecciona visualmente cada canalización para comprobar que las dimensiones de las canalizaciones, la ubicación de las unidades terminales, de los reguladores de presión de la línea (si existen instalados) y de las válvulas de corte son conformes con la especificación de diseño.

###### **C.2.2.3 Resultados del ensayo**

Los resultados se registran en el impreso D.3.

### **C.3 Ensayos y procedimientos antes de la utilización de los sistemas (véase 12.4)**

#### **C.3.1 Ensayos de fugas y de integridad mecánica**

##### **C.3.1.1 Ensayos de integridad mecánica de los sistemas de canalización de vacío (véase 12.6.1.1)**

**ADVERTENCIA** – Se deberían tomar precauciones para evitar los peligros para el personal que surjan de la rotura posible de la canalización.

###### **C.3.1.1.1 Generalidades**

Este ensayo se puede efectuar en secciones de la canalización, siempre que no se omita ninguna parte del sistema. La sección a ensayar debería estar instalada de forma completa y sujeta firmemente en su sitio. Deberían estar instalados y obturados los bloques base de todas las unidades terminales. Deberían estar obturados todos los conectores de las válvulas de descarga de presión, manómetros e interruptores de presión. Si se ensayan secciones separadas, cada sección objeto del ensayo se debería aislar del resto del sistema.

###### **C.3.1.1.2 Ejemplo de procedimiento**

Se conecta un dispositivo de medición de la presión adecuado a la sección objeto del ensayo. La(s) sección(es) a ensayar se llena(n) con el gas de ensayo a 500 kPa. Después de 5 min, se comprueba que el sistema no se ha fracturado.

###### **C.3.1.1.3 Resultados del ensayo**

Los resultados se registran en el impreso D.4.1.

##### **C.3.1.2 Ensayo de fugas en el sistema de canalización de vacío (véase 12.6.1.2)**

###### **C.3.1.2.1 Generalidades**

Se deberían haber instalado todas las unidades terminales, válvulas y otros servicios tales como los manómetros y los interruptores de vacío. El sistema de vacío se debería conectar al sistema objeto del ensayo.

###### **C.3.1.2.2 Ejemplo de procedimiento**

Se conecta un manómetro al sistema. Se hace funcionar el sistema de vacío hasta que se alcanza la presión de distribución nominal. Con el sistema a la presión de distribución nominal, se aísla el sistema de vacío. Se comprueba que el aumento de presión después de 1 h no es superior a 20 kPa con todas las válvulas de corte abiertas.

###### **C.3.1.2.3 Resultados del ensayo**

Los resultados se registran en el impreso D.4.2.

##### **C.3.1.3 Ensayo de integridad mecánica para los sistemas de canalización de gases medicinales comprimidos (véase 12.6.1.3)**

**ADVERTENCIA** – Se deberían tomar precauciones para evitar los peligros para el personal que surjan de la rotura posible de la canalización.

###### **C.3.1.3.1 Generalidades**

Este ensayo se puede efectuar en secciones de la canalización, siempre que no se omita ninguna parte del sistema. La sección a ensayar debería estar completamente instalada y sujeta firmemente en su sitio. Deberían estar instalados y obturados los bloques base de todas las unidades terminales. Deberían estar obturados todos los conectores de las válvulas de descarga de presión, manómetros e interruptores de presión. Si se ensayan secciones separadas, cada sección objeto del ensayo se debería aislar del resto del sistema.

### **C.3.1.3.2 Ejemplo de procedimiento**

Se conecta un dispositivo de medición de la presión adecuado a la sección objeto del ensayo. Se llenan(n) la(s) sección(es) a ensayar con el gas de ensayo a una presión 1,2 veces la presión máxima especificada en el apartado 12.6.1.3 para tal sección. Después de 5 min, se comprueba que el sistema no se ha fracturado.

### **C.3.1.3.3 Resultados del ensayo**

Los resultados se registran en el impreso D.5.1.

## **C.3.1.4 Ensayo de fugas de los sistemas de canalización de gases medicinales comprimidos (véase 12.6.1.4)**

### **C.3.1.4.1 Generalidades**

Estos ensayos se pueden efectuar en las secciones de cada canalización, siempre que no se omita ninguna sección y que se mantenga la integridad de la canalización. Deberían estar instaladas todas las unidades terminales, válvulas, reguladores de presión de la línea, manómetros y sensores de presión. El sistema de suministro se debería aislar de la canalización.

### **C.3.1.4.2 Ejemplo de procedimiento**

Se conecta un dispositivo de medición de la presión adecuado a cada sección del(de los) sistema(s) objeto del ensayo.

Para los sistemas de distribución canalizada de una sola etapa, se presuriza con el gas de ensayo a la presión de distribución nominal cada sección aguas arriba y aguas abajo de cada válvula de corte de zona. Se debe utilizar un medio que permita el aislamiento físico entre cada sección aguas arriba y aguas abajo de cada válvula de corte de zona.

Para los sistemas de distribución canalizada de doble etapa, se presuriza con el gas de ensayo a la presión nominal del sistema de suministro cada sección aguas arriba de cada regulador de presión y a la presión de distribución nominal cada sección aguas abajo de cada regulador de presión de la línea de la zona. Se debería utilizar un medio que permita el aislamiento físico entre las secciones aguas arriba y aguas abajo de cada regulador de presión de la línea.

NOTA Las válvulas de corte instaladas aguas arriba y aguas abajo de cada regulador de presión de la línea (véase 7.4.2) junto con el regulador de presión de la línea ajustado a flujo cero se pueden considerar como un medio que permite el aislamiento físico.

Se desconecta y retira el suministro del gas de ensayo. Se registra la presión y la temperatura ambiente inicialmente y al final del periodo de ensayo (2 h a 24 h). Se comprueba que en cada sección aguas arriba de cada válvula de corte de zona (o de cada regulador de presión de la línea), el descenso de presión no sea superior a 0,025% de la presión de ensayo inicial por hora.

Se comprueba que en cada sección aguas abajo de cada válvula de corte de zona (o regulador de presión de la línea), el descenso de presión no sea superior a 0,4 %/h de la presión de ensayo inicial en las secciones que no incluyen mangueras flexibles en unidades de suministro médico o 0,6 %/h de la presión de ensayo inicial en las secciones que incluyen mangueras flexibles en unidades de suministro médico.

### **C.3.1.4.3 Resultados del ensayo**

Los resultados se registran en los impresos D.5.2 y D.5.3.

## **C.3.1.5 Ensayos combinados de fugas e integridad mecánica de los sistemas de canalización de gases medicinales comprimidos (antes de la ocultación) (véase 12.6.1.5)**

**ADVERTENCIA – Se deberían tomar precauciones para evitar los peligros para el personal que surjan de la rotura posible de la canalización.**

### **C.3.1.5.1 Generalidades**

Este ensayo se puede efectuar en secciones de la canalización, siempre que no se omita ninguna parte del sistema. El sistema de suministro debería estar aislado de la canalización. La sección a ensayar debería estar instalada de forma completa y sujeta firmemente en su sitio. Deberían estar instalados y obturados los bloques de la base de todas las unidades terminales. Deberían estar obturados todos los conectores de las válvulas de descarga de presión, manómetros e interruptores de presión. Si se ensayan secciones separadas, cada sección objeto del ensayo se debería aislar del resto del sistema.

### **C.3.1.5.2 Ejemplo de procedimiento**

**C.3.1.5.2.1** Se conecta un dispositivo de medición de la presión adecuado a la sección objeto del ensayo. Se presuriza con el gas de ensayo cada sección a ensayar a una presión 1,2 veces la presión máxima especificada en el apartado 12.6.1.5 para tal sección. Después de 5 min, se comprueba que el sistema no se ha fracturado.

**C.3.1.5.2.2** A la(s) misma(s) presión(es) de ensayo, se comprueba que el descenso de presión durante un periodo de ensayo de 2 h a 24 h no es superior a 0,025% de la presión de ensayo inicial por hora, excepto para los cambios de presión debidos a variaciones de temperatura.

NOTA El cambio de presión debido a las variaciones de temperatura es aproximadamente 0,35% / °C (véase el anexo E).

### **C.3.1.5.3 Resultados del ensayo**

Los resultados se registran en el impreso D.6.1.

### **C.3.1.6 Ensayos combinados de fugas e integridad mecánica de los sistemas de canalización de gases medicinales comprimidos (después de la ocultación) (véase 12.6.1.6)**

**ADVERTENCIA** – Se deberían tomar precauciones para evitar los peligros para el personal que surjan de la rotura posible de la canalización.

#### **C.3.1.6.1 Generalidades**

Estos ensayos se pueden efectuar en las secciones de cada canalización, siempre que no se omita ninguna sección y que se mantenga la integridad de la canalización. Deberían estar instaladas todas las unidades terminales, válvulas, reguladores de presión de la línea, manómetros y sensores de presión. El sistema de suministro se debería aislar de la canalización.

#### **C.3.1.6.2 Ejemplo de procedimiento**

**C.3.1.6.2.1** Se conecta un dispositivo de medición de la presión adecuado a la sección objeto del ensayo. Se presuriza con el gas de ensayo cada sección a ensayar a una presión 1,2 veces la presión máxima especificada en el apartado 12.6.1.6 para tal sección. Después de 5 min, se comprueba que el sistema no se ha fracturado.

**C.3.1.6.2.2** Se efectúa el ensayo de fugas conforme con el apartado 12.6.1.4.

#### **C.3.1.6.3 Resultados del ensayo**

Los resultados se registran en el impreso D.6.2, impreso D.5.2 y/o impreso D.5.3.

### **C.3.2 Ensayo de fugas y cierre de las válvulas de corte de zona y comprobaciones de la zonificación correcta y de la identificación correcta (véase 12.6.2)**

#### **C.3.2.1 Generalidades**

Los ensayos dados en el apartado C.3.1 se deberían haber completado satisfactoriamente y todas las unidades terminales deberían estar cerradas. Este ensayo se puede efectuar en más de un sistema simultáneamente.

El ensayo de fugas y cierre de las válvulas de corte de zona no se aplica a los sistemas de vacío.



### C.3.2.2 Ejemplo de procedimiento

**C.3.2.2.1** El sistema de canalización se presuriza a su presión de distribución nominal con todas las válvulas de corte de zona abiertas. Se conecta un dispositivo de medición de la presión aguas abajo de cada válvula de corte de zona. Se cierran todas las válvulas de corte de zona.

**C.3.2.2.2** Se despresuriza el sistema de canalización aguas abajo de cada válvula de corte hasta 100 kPa abriendo una unidad terminal. Se cierra la unidad terminal.

**C.3.2.2.3** Se comprueba que el aumento de presión no es superior a 5 kPa después de 15 min.

**C.3.2.2.4** Se anotan el número total y la ubicación de las unidades terminales controladas por cada válvula de corte de zona y se comprueba que estas unidades terminales están etiquetadas correctamente.

### C.3.2.3 Resultados del ensayo

Los resultados se registran en el impreso D.7.

## C.3.3 Ensayo de conexión cruzada (véase 12.6.3)

### C.3.3.1 Ejemplo 1 de procedimiento (FD S90-155<sup>[32]</sup>)

Para garantizar la no inversión y la identidad del gas, el fabricante debería utilizar el método siguiente. Se comienza con un ensayo inicial de la ausencia de gas en todas las unidades terminales en el sector a ensayar, despresurizando el sistema de canalización y cortando el suministro a la sección. Se verifica la ausencia de gas en todas las unidades terminales.

A continuación se despresuriza una única canalización de gas, por ejemplo, oxígeno. Se verifica que la canalización de oxígeno tiene presión y que no existe presión en las otras unidades terminales. La identificación positiva del gas mediante análisis (por ejemplo, verificando el porcentaje de oxígeno para las unidades terminales de oxígeno) en la unidad terminal más cercana y más lejana de la canalización ubicada aguas abajo de la válvula de zona se debería confirmar utilizando un analizador de gas selectivo.

A continuación, se efectúa el mismo ensayo, de forma sucesiva, en las unidades terminales de los otros gases. Se comienza con el gas más oxidante y se continúa con los menos oxidantes. Si dos gases no oxidantes (óxido nitroso, dióxido de carbono, nitrógeno) se canalizan en el interior de una zona, es imperativo distinguir entre cada uno de los gases utilizando otro ensayo discriminatorio.

NOTA 1 Los medios técnicos de identificación pueden ser aquellos mencionados en antes en este apartado o aquellos de la farmacopea europea, por ejemplo, utilizando analizadores o tubos colorimétricos específicos.

NOTA 2 Se pueden utilizar métodos de ensayo similares siempre que cumplan los requisitos del apartado 4.2.

Si se descubre una conexión cruzada y/o un fallo en la identidad del gas durante el ensayo, se debe efectuar un ensayo completo de nuevo después de la identificación y corrección del defecto.

### C.3.3.2 Ejemplo 2 de procedimiento (Tomado de CSA Z7396.1-12<sup>[52]</sup>)

Tras haber completado con éxito los ensayos de conexión cruzada utilizando el método 1 del apartado B.3.2, el método 2 del apartado B.3.3, o el método 3 del apartado B.3.4, cada sistema de distribución canalizada para los gases comprimidos se llena y se vacía con su gas específico un número suficiente de veces para desplazar el gas de ensayo. Cada unidad terminal se abre sucesivamente para garantizar que no quedan secciones de la canalización llenas con gas de ensayo.

Para el método 2, el procedimiento es el siguiente:

- a) Cuando todos los sistemas de canalización de gases medicinales se han ensayado de acuerdo con el apartado 11.4.3.2, la fuente del gas de ensayo se desconecta y la fuente de suministro del gas apropiado se conecta a cada sistema respectivo.

- b) Cada sistema se purga un número suficiente de veces para eliminar el gas de ensayo.
- c) El regulador de presión de la línea que controla cada gas canalizado se ajusta para mantener una diferencia de presión claramente reconocible no inferior a 35 kPa (5 psi) entre cada gas.
- d) El sistema de vacío está en funcionamiento y se miden y registran los ajustes de inicio de flujo y corte de flujo del controlador de la bomba de vacío.
- e) Después del ajuste y registro de las presiones según se especifica en los puntos c) y d), cada terminal se ensaya utilizando un manómetro. La presión real se mide con un manómetro conectado al adaptador específico para tal unidad terminal, enclavado en su sitio antes de tomar la lectura. El ensayo no se hace nunca utilizando un así llamado “Adaptador Universal”. La presión en la unidad terminal se registra a un caudal comprendido entre 15 l/min y 25 l/min y debe ser la misma que la presión seleccionada o registrada de acuerdo con los puntos (c) y (d).

Para el método 3, el procedimiento es el siguiente:

- a) Todos los sistemas de canalización de gases medicinales se han conectado a sus sistemas de suministro respectivos.
- b) Cada sistema de canalización se purga a contra corriente un número suficiente de veces para eliminar el gas de ensayo y/o el nitrógeno para los sistemas que no canalizan nitrógeno.
- c) Se cierran todas las válvulas de zona para la zona respectiva objeto del ensayo y la presión de cada gas se ajusta a un valor que tenga una diferencia de presión claramente reconocible no inferior a 35 kPa (5 psi) entre cada gas.
- d) Se cierran las válvulas de la zona de vacío y del SEGA y cada sistema se ajusta a un valor inferior al vacío del sistema nominal. Los valores recomendados para los ensayos son - 40 kPa para el vacío y - 27 kPa para el SEGA.
- e) Tras efectuar los ajustes y presiones registradas que se especifican en los puntos c) y d), cada unidad terminal se ensaya utilizando un manómetro. Debe procederse con cuidado para garantizar que se mantienen las diferencias de presión. Si es preciso, se detiene el ensayo y se restablece el valor de la presión al ajuste inicial. La presión real se mide con un manómetro conectado al adaptador específico para esa unidad terminal.
- f) Cada unidad terminal se identifica por su nombre y su color.
- g) Una vez se han ensayado todas las unidades terminales a sus valores de la presión ajustados, la válvula de zona para un gas respectivo con su adaptador conectado se abre lentamente para confirmar que la válvula de zona del gas respectivo y la unidad terminal respectiva de ese gas se corresponden. Todas las zonas se abren individualmente de esta forma.
- h) Todos los terminales de gas a presión se ensayan entonces utilizando el analizador de gas apropiado.
- i) Si las presiones no se pueden mantener debido a un funcionamiento defectuoso del sistema (por ejemplo, fuga en el sistema, válvula que no cierra/abre bien), el ensayo no puede comenzar hasta que se investigue y corrija el funcionamiento defectuoso.

El flujo de salida de cada unidad terminal se ensaya utilizando un analizador de gas apropiado para confirmar la presencia del gas deseado. La concentración de gas nominal se mide y se registra y se verifica que cumple su valor especificado en la parte A de la tabla D.4

### **C.3.4 Ensayo de obstrucción y flujo (véase 12.6.4)**

#### **C.3.4.1 Generalidades**

Estos ensayos se pueden hacer simultáneamente con el ensayo de conexión cruzada descrito en el apartado C.3.3. En este caso, sólo está presurizado un sistema de canalización simultáneamente. De forma alternativa, después de completar los ensayos dados en el apartado C.3.3, todos los sistemas de canalización se pueden presurizar a la presión de distribución nominal y los ensayos descritos en los apartados C.3.5 y C.3.6 se pueden efectuar simultáneamente.

#### **C.3.4.2 Ejemplo de procedimiento**

**C.3.4.3** Se inserta un cabezal de ensayo selectivo del gas con manómetro y caudalímetro en cada unidad terminal sucesivamente.

**C.3.4.4** Se comprueba que el cambio de presión entre el caudal cero y el caudal de ensayo especificado en cada unidad terminal y también la contrapresión para el aire o nitrógeno motriz para instrumentos quirúrgicos no sobrepasa el valor dado en la **tabla 4**.

#### **C.3.4.5 Resultados del ensayo**

Los resultados se registran en los impresos D.9 y D.10.

### **C.3.5 Comprobación del funcionamiento mecánico, especificidad e identificación del gas de las unidades terminales y de los conectores NIST, DISS o SIS (véase 12.6.5)**

#### **C.3.5.1 Generalidades**

Todas las unidades terminales deberían estar completas con su placa frontal.

Estos ensayos se pueden hacer simultáneamente con el ensayo de conexión cruzada descrito en el apartado C.3.3. En este caso, sólo está presurizado un sistema de canalización a la vez. De forma alternativa, después de completar los ensayos dados en el apartado C.3.3, todos los sistemas de canalización se pueden presurizar a la presión de distribución nominal y los ensayos descritos en los apartados C.3.5 y C.3.6 se pueden efectuar simultáneamente.

#### **C.3.5.2 Ejemplo de procedimiento**

**C.3.5.2.1** Se comprueba que el cabezal selectivo del gas se puede insertar, puede quedar retenido y se puede liberar fácilmente. Si se proporciona un dispositivo que impide la articulación giratoria, se comprueba que éste retiene el cabezal en la orientación correcta.

**C.3.5.2.2** Se comprueba que no se libera gas en ninguna unidad terminal por inserción de los cabezales de cualquier otro gas y que no puede quedar retenido ningún cabezal para otros gases.

**C.3.5.2.3** Se comprueba que todos los conectores NIST, DISS y SIS aceptan los nipples apropiados y que se hace una conexión mecánica. Se comprueba que los nipples NIST, DISS o SIS para todos los demás gases no se acoplan a los conectores objeto del ensayo.

**C.3.5.2.4** Se comprueba que todas las unidades terminales están identificadas y etiquetadas correctamente y que cumplen los requisitos especificados en el apartado 12.6.5.

#### **C.3.5.3 Resultados del ensayo**

Los resultados se registran en los impresos D.9 y D.10.

### **C.3.6 Ensayos de las prestaciones del sistema (véase 12.6.6)**

#### **C.3.6.1 Generalidades**

Estos ensayos se deberían efectuar de forma sucesiva para cada uno de los sistemas. Todas las válvulas de corte deberían estar abiertas. Se conecta un suministro del gas de ensayo de la capacidad suficiente para mantener el caudal de diseño del sistema durante varios minutos a la entrada del sistema de distribución canalizada. El sistema de suministro vacío se debería utilizar para ensayar el sistema de canalización de vacío.

### **C.3.6.2 Ejemplo de procedimiento**

**C.3.6.2.1** Se presuriza (o se hace el vacío en) la canalización hasta una presión no superior a la presión (o vacío) de distribución máxima. Se registra la presión.

**C.3.6.2.2** Se insertan cabezales en las unidades terminales seleccionadas de la canalización objeto del ensayo para proporcionar un flujo total igual al caudal de diseño del sistema. Cada cabezal debe estar equipado con un orificio calibrado.

**C.3.6.2.3** Se observa y registra la presión manométrica para el flujo especificado en las unidades terminales seleccionadas del sistema de canalización. Las unidades terminales seleccionadas deberían estar alejadas del sistema de suministro (por ejemplo, al final de cada rama).

**C.3.6.2.4** Se comprueba que la presión en cada unidad terminal seleccionada está dentro de los límites dados en los apartados 7.2.2, 7.2.3 y 7.2.4.

**C.3.6.2.5** Se despresuriza el sistema y se repite el ensayo para cada servicio.

### **C.3.6.3 Resultados del ensayo**

Los resultados se registran en el impreso D.11.

## **C.3.7 Comprobaciones de las prestaciones del sistema mediante la verificación de los cálculos (véase 12.6.6)**

### **C.3.7.1 Generalidades**

Una comprobación de las prestaciones del sistema mediante verificación de los cálculos se considera un medio alternativo para mostrar la conformidad con los requisitos dados en la tabla 2, y en los apartados 7.2.2, 7.2.3 y 7.2.4.

### **C.3.7.2 Resultados de la comprobación**

Los resultados de la comprobación se registran en el impreso D.11.

## **C.3.8 Ensayo de las válvulas de descarga de presión (véase 12.6.7)**

### **C.3.8.1 Generalidades**

Si se instalan válvulas de descarga de presión que han pasado con éxito ensayos de tipo y están certificadas, no se requieren los ensayos de funcionamiento de la válvula de descarga de presión, siempre que se cumplan los requisitos de los apartados 7.2.5 y 7.2.6.

Si las válvulas de descarga de presión instaladas no se han sometido a ensayos de tipo y no están certificadas, se deberían verificar sus prestaciones conforme con el procedimiento dado en el apartado C.3.8.2.

### **C.3.8.2 Ejemplo de procedimiento**

**C.3.8.2.1** Se inspecciona cada válvula de descarga de presión para comprobar la capacidad de descarga y la presión de ajuste.

**C.3.8.2.2** Se inspecciona la certificación suministrada con cada válvula de descarga de presión.

**C.3.8.2.3** Se inspecciona la instalación de las válvulas de descarga de presión para verificar que el conducto de purga está correctamente instalado.

**C.3.8.2.4** Se aísla una sección de la canalización en la que esté situada la válvula de descarga de presión a ensayar.

**C.3.8.2.5** Se aumenta gradualmente la presión en esta sección de la canalización y se anota la presión a la que se abre la válvula de descarga de presión y la presión a la que permite la descarga máxima.

**C.3.8.2.6** Se reduce gradualmente la presión hasta el valor presente normalmente en la sección objeto del ensayo y se anota el valor al que se vuelve a cerrar la válvula de descarga de presión quedando hermética.

**C.3.8.2.7** Se verifica que la presión a la que funciona la válvula de descarga de presión permite que el sistema cumpla los requisitos de los apartados 7.2.5 o 7.2.6 según proceda.

### **C.3.8.3 Resultados del ensayo**

Los resultados se registran en el impreso D.12.

## **C.3.9 Ensayos de las fuentes de suministro (véase 12.6.8)**

### **C.3.9.1 Generalidades**

Todas las fuentes de suministro deberían estar instaladas y conectadas a las fuentes de alimentación de potencia eléctrica normales y de emergencia, según se requiera. Se deberían haber preparado listas de comprobación específicas para cada sistema de suministro para cumplir los requisitos del capítulo 5 y las especificaciones del fabricante.

### **C.3.9.2 Ejemplo de procedimiento**

El ensayo de fugas se hace para todos los componentes. Los sistemas compresores de aire se someten al ensayo de fugas durante la operación normal. Las fugas pequeñas detectables como burbujas son aceptables. Se comprueba la función y los parámetros de funcionamiento de cada sistema de suministro de la lista de comprobación. Se comprueba que el sistema de suministro funciona con la fuente de alimentación de potencia eléctrica de emergencia. Se verifica que los resultados del ensayo son conformes con las especificaciones del fabricante y los requisitos del capítulo 5. Se verifica que se cumplen los requisitos del caudal de diseño del sistema.

### **C.3.9.3 Resultados del ensayo**

Los resultados se registran en el impreso D.13.

## **C.3.10 Ensayos de los sistemas de supervisión y alarma (véase 12.6.9)**

### **C.3.10.1 Generalidades**

Estos ensayos se deberían efectuar de forma sucesiva para cada función individual, en cada sistema individual. Todos los sistemas de alarma deberían estar instalados totalmente y en funcionamiento.

### **C.3.10.2 Ejemplo de procedimiento**

**C.3.10.2.1** Se comprueba que todas las alarmas se activan con un cambio apropiado en la condición del sistema local (por ejemplo, la presión, contenido en humedad, nivel del líquido, y recambio del sistema). Se registran los ajustes a los que se activan y desactivan los sensores de la alarma.

**C.3.10.2.2** Se observan todas las funciones de alarma, incluyendo las señales visuales y sonoras, el reajuste de las señales sonoras y el ensayo de las lámparas. Se comprueba que las características visuales y sonoras de todas las señales son conformes con el capítulo 6, si procede.

**C.3.10.2.3** Se verifica que todos los monitores y alarmas funcionan con los cambios apropiados en las condiciones del sistema de canalización y funcionan conectados a las fuentes de alimentación de potencia eléctrica normales y de emergencia.

**C.3.10.2.4** Se verifica que todos los monitores y alarmas cumplen los requisitos del capítulo 6.

### **C.3.10.3 Resultados del ensayo**

Los resultados se registran en los impresos D.14.1 y D.14.2.

### **C.3.11 Ensayo de la contaminación por partículas (véase 12.6.10)**

#### **C.3.11.1 Generalidades**

Los sistemas de canalización de gases medicinales comprimidos deberían estar a la presión de distribución nominal y llenos con el gas de ensayo.

#### **C.3.11.2 Ejemplo de procedimiento**

Se ensaya la unidad terminal más distante de la fuente de suministro en cada línea de la rama de la canalización con el dispositivo mostrado en la figura 1 a un caudal de 150 l/min durante 15 s. Se verifica que los filtros están exentos de partículas cuando se observan con buena iluminación.

### **C.3.13.3 Resultados del ensayo**

Los resultados se registran en el impreso D.15.

### **C.3.12 Ensayos de la calidad del aire para uso médico y del aire motriz para instrumentos quirúrgicos producido por los sistemas de suministro con compresor(es) de aire (véanse 12.6.11 y 12.6.12)**

#### **C.3.12.1 Generalidades**

Estos ensayos se deberían efectuar en cada unidad de compresor sucesivamente, en la conexión de muestreo inmediatamente aguas abajo de los sistemas acondicionadores, antes de llenar el sistema de distribución canalizada con aire del sistema compresor. El sistema de suministro se debería aislar del sistema de distribución canalizada cerrando la válvula de corte del suministro.

NOTA La información sobre los métodos de ensayo se puede encontrar en los documentos ISO 8573-3 <sup>[12]</sup>, ISO 8573-4 <sup>[13]</sup>, ISO 8573-6 <sup>[15]</sup> e ISO 8573-8 <sup>[16]</sup>.

#### **C.3.12.2 Ejemplo de procedimiento**

##### **C3.12.2.1 Concentración de oxígeno**

Utilizando un analizador de oxígeno, se verifica que la concentración de oxígeno cumple los requisitos del apartado 5.5.2.1.

##### **C.3.12.2.2 Aceite**

Se ensaya el aceite presente como líquido, aerosol y vapor en la conexión de muestreo utilizando un dispositivo de ensayo apropiado. Se verifica que la concentración de aceite total no es superior al valor dado en los apartados 5.5.2.1 y 5.5.2.3.

NOTA La información sobre los métodos de ensayo se puede encontrar en los documentos ISO 8573-2<sup>[11]</sup> e ISO 8573-5 <sup>[14]</sup>.

##### **C.3.12.2.3 Agua**

Se ensaya el contenido de vapor de agua en la conexión de muestreo utilizando un dispositivo de ensayo apropiado. Se verifica que el contenido de vapor de agua no es superior al valor dado en los apartados 5.5.2.1 o 5.5.2.3. Este ensayo se debería repetir después de llenar el sistema de distribución canalizada con aire de una muestra del 5% de las unidades terminales en puntos distantes de la fuente de suministro (véase C.3.15.2.5).

#### **C.3.12.2.4 Monóxido de carbono y dióxido de carbono**

Se determinan las concentraciones de monóxido de carbono y dióxido de carbono en la conexión de muestreo utilizando dispositivos de ensayo apropiados. Se verifica que las concentraciones no son superiores a los valores dados en el apartado 5.5.2.1.

NOTA La información sobre los métodos de ensayo se puede encontrar en la Norma ISO 8573-6 <sup>[15]</sup>.

#### **C.3.12.2.5 Dióxido de azufre, monóxido de nitrógeno y dióxido de nitrógeno**

Se determinan las concentraciones de dióxido de azufre, monóxido de nitrógeno y dióxido de nitrógeno en la conexión de muestreo utilizando dispositivos de ensayo apropiados. Se verifica que las concentraciones no son superiores a los valores dados en el apartado 5.5.2.1.

#### **C.3.12.2.6 Contaminación por partículas**

Se efectúa el ensayo de contaminación por partículas en la conexión de muestreo utilizando un dispositivo de ensayo descrito en el apartado 12.6.10. Se verifica que se cumplen los requisitos del apartado 12.6.10.

Para el aire para uso médico, se registran los resultados en el impreso D.16. Para el aire motriz para instrumentos quirúrgicos, los resultados se registran en el impreso D.17.

### **C.3.13 Ensayo de la calidad del aire para uso médico producido por los sistemas de suministro con unidad(es) mezcladora(s) (véase 12.6.13)**

#### **C.3.13.1 Generalidades**

Estos ensayos se deberían efectuar antes de llenar el sistema de distribución canalizada con aire medicinal producido por el sistema mezclador. El sistema de suministro debería estar aislado del sistema de distribución canalizada cerrando la válvula de corte del suministro.

Estos ensayos se deberían efectuar en cada sistema mezclador sucesivamente, si existe instalado más de uno, en una conexión de muestreo adecuada en cada sistema inmediatamente aguas arriba de la válvula de corte del suministro.

#### **C.3.13.2 Ejemplo de procedimiento**

##### **C.3.13.2.1 Concentración de oxígeno**

Utilizando un analizador de oxígeno, se verifica que la concentración de oxígeno cumple los requisitos del apartado 5.5.3.1.

##### **C.3.13.2.2 Contenido de vapor de agua**

Utilizando un dispositivo de ensayo apropiado en la conexión de muestreo, se verifica que el contenido de vapor de agua no es superior al valor dado en el apartado 5.5.3.1.

##### **C.3.13.3 Resultados del ensayo**

Los resultados se registran en el impreso D.18.

### **C.3.14 Ensayo de la calidad del oxígeno 93 producido por los sistemas de suministro con concentrador(es) de oxígeno (véase 12.6.14)**

#### **C.3.14.1 Generalidades**

Estos ensayos se deberían efectuar antes de llenar el sistema de distribución canalizada con oxígeno 93. El sistema de suministro se debería aislar del sistema de distribución canalizada cerrando la válvula de corte del suministro.

Estos ensayos se deberían efectuar en cada concentrador de oxígeno sucesivamente en un punto de ensayo inmediatamente aguas arriba de la válvula de corte del suministro.

### **C.3.14.2 Ejemplo de procedimiento**

#### **C.3.14.2.1 Concentración de oxígeno**

Utilizando un analizador de oxígeno, se verifica que la concentración de oxígeno cumple los requisitos del punto a) del apartado 5.6.5.

#### **C.3.14.2.2 Monóxido de carbono y dióxido de carbono**

Utilizando dispositivos de ensayo apropiados en la conexión de muestreo, se verifica que las concentraciones de monóxido de carbono y dióxido de carbono no son superiores a los niveles especificados en los puntos b) y c) del apartado 5.6.5.

#### **C.3.14.2.3 Contaminación por partículas**

Utilizando dispositivos de ensayo apropiados en la conexión de muestreo, se verifica que la contaminación por partículas no es superior al nivel especificado en el apartado 5.6.5.

#### **C.3.14.2.4 Contaminación de aceite**

Utilizando dispositivos de ensayo apropiados en la conexión de muestreo, se verifica que la concentración de aceite no es superior al nivel especificado en el punto d) del apartado 5.6.5.

#### **C.3.14.2.5 Contenido de vapor de agua**

Utilizando dispositivos de ensayo apropiados en la conexión de muestreo, se verifica que el contenido de vapor de agua no es superior al nivel especificado en el punto e) del apartado 5.6.5.

### **C.3.14.3 Resultados del ensayo**

Los resultados se registran en el impreso D.19.

## **C.3.15 Llenado con el gas específico (véase 12.6.15)**

### **C.3.15.1 Generalidades**

Todos los sistemas se pueden llenar con sus gases específicos simultáneamente. El llenado con el gas selectivo se puede efectuar simultáneamente con el ensayo de la identidad del gas (véase C.3.16). Todos los ensayos previos se deberían haber completado de forma satisfactoria. Se deberían desconectar las fuentes del gas de ensayo. Todos los sistemas de canalización deberían estar a la presión atmosférica. Cada sistema de canalización se debería conectar a su fuente de suministro con todas las válvulas de corte abiertas excepto la válvula de corte del suministro. Todos los conectores especiales se deberían retirar del lugar.

### **C.3.15.2 Ejemplo de procedimiento**

**C.3.15.2.1** Se abre la válvula de corte del suministro y se llena cada sistema de canalización desde su sistema de suministro a la presión o vacío de distribución nominal.

**C.3.15.2.2** Excepto para las canalizaciones de vacío, se permite un flujo de gas desde cada unidad terminal sucesivamente. Se cierra la válvula de corte del suministro y se deja que la presión en cada canalización descienda hasta la atmosférica. Todos los gases excepto el aire se deberían purgar al exterior del edificio.

**C.3.15.2.3** Se abre la válvula de corte del suministro y se rellena cada canalización a la presión de distribución nominal. Se repite el procedimiento dado en los apartados C.3.15.2.1 y C.3.15.2.2 tantas veces como se requiera hasta verificar una identidad de gas que sea conforme con los requisitos del apartado 12.6.16.



**C.3.15.2.4** Se deja cada sistema de canalización a la presión de distribución nominal con el sistema de suministro conectado.

**C.3.15.2.5** Para aire medicinal o aire motriz para instrumentos quirúrgicos suministrado por sistemas de suministro con compresores de aire, el contenido de vapor de agua se debería ensayar en al menos una unidad terminal en cada rama (la unidad terminal más distante de la fuente de suministro).

### **C.3.15.3 Resultados del ensayo**

Se registra en el impreso D.20 que todos los sistemas de canalización están llenados con el gas específico.

## **C.3.16 Ensayos de la identidad del gas (véase 12.6.16)**

### **C.3.16.1 Generalidades**

Los sistemas de canalización deberían estar a la presión de distribución nominal y llenados con los gases selectivos. Todos los sistemas de canalización se deberían ensayar simultáneamente. Ningún equipo médico debería estar conectado a los sistemas de canalización. Todos los demás ensayos en el capítulo C.3 se deberían haber completado de forma satisfactoria antes de efectuar este ensayo.

### **C.3.16.2 Ejemplo de procedimiento**

Las unidades terminales se ensayan de la forma siguiente:

- a) para cada sistema de canalización que contiene gas con una concentración de oxígeno característica [por ejemplo, oxígeno (100% fracción en volumen), oxígeno 93 (conforme con su especificación), mezcla de oxígeno/óxido nitroso (conforme con su especificación), aire medicinal (21% fracción en volumen) y aire motriz para instrumentos quirúrgicos (21% fracción en volumen)], se mide la concentración de oxígeno utilizando un analizador de oxígeno. Para los sistemas de canalización que contienen gas con la misma concentración de oxígeno característica pero a diferentes presiones (por ejemplo, aire medicinal, 400 kPa, y aire motriz para instrumentos quirúrgicos, 800 kPa), se mide la presión utilizando un manómetro;
- b) para cada sistema de canalización que no contiene oxígeno (excepto como un contaminante), se utiliza ya sea un analizador selectivo del gas o se ajusta cada sistema a una presión diferente y se mide la presión estática. Después de tal procedimiento, la presión se debería reajustar a la presión de distribución nominal para cada sistema;
- c) para los sistemas de vacío, se mide la presión utilizando un manómetro de vacío.

### **C.3.16.3 Resultados del ensayo**

Los resultados se registran en el impreso D.21.1 y/o en el impreso D.21.2 y/o en el impreso D.21.3.

## **Anexo D (Informativo)**

### **Impresos típicos para documentar la conformidad de los sistemas de canalización para gases medicinales comprimidos y el vacío**

Los impresos dados en este anexo se han de cumplimentar durante los ensayos y puesta en servicio de los sistemas de canalización para gases medicinales comprimidos y el vacío de acuerdo con el anexo C.

(Página \_\_\_ de \_\_\_ páginas)

D.1.1

(Instalación sanitaria) \_\_\_\_\_ en (Identificación de la zona) \_\_\_\_\_

Este documento es para certificar que los ensayos y procedimientos siguientes se han efectuado de forma satisfactoria para los sistemas de canalización de gases medicinales y vacío en la instalación sanitaria

| Impreso | Descripción de los ensayos y procedimientos                                                                                        | Ensayos requeridos (Si/No) | Procedimiento        | Especificación         | Fecha de terminación |
|---------|------------------------------------------------------------------------------------------------------------------------------------|----------------------------|----------------------|------------------------|----------------------|
| D.2     | Marcado y soportes                                                                                                                 |                            | C.2.1                | 12.5.1                 |                      |
| D.3     | Especificación del diseño                                                                                                          |                            | C.2.2                | 12.5.2                 |                      |
| D.4.1   | Integridad mecánica de los sistemas de canalización de vacío                                                                       |                            | C.3.1.1              | 12.6.1.1               |                      |
| D.4.2   | Fugas en los sistemas de canalización de vacío                                                                                     |                            | C.3.1.2              | 12.6.1.2               |                      |
| D.5.1   | Integridad mecánica de los sistemas de canalización de gases medicinales comprimidos                                               |                            | C.3.1.3              | 12.6.1.3               |                      |
| D.5.2   | Fugas de los sistemas de canalización de gases medicinales comprimidos (secciones aguas arriba)                                    |                            | C.3.1.4 o<br>C.3.1.6 | 12.6.1.4 o<br>12.6.1.6 |                      |
| D.5.3   | Fugas de los sistemas de canalización de gases medicinales comprimidos (secciones aguas abajo)                                     |                            | C.3.1.4 o<br>C.3.1.6 | 12.6.1.4 o<br>12.6.1.6 |                      |
| D.6.1   | Fugas e integridad mecánica combinadas de los sistemas de canalización de gases medicinales comprimidos (antes de la ocultación)   |                            | C.3.1.5              | 12.6.1.5               |                      |
| D.6.2   | Fugas e integridad mecánica combinadas de los sistemas de canalización de gases medicinales comprimidos (después de la ocultación) |                            | C.3.1.6              | 12.6.1.6               |                      |
| D.7     | Fugas, cierre, zonificación e identificación de las válvulas de corte de zona                                                      |                            | C.3.2                | 12.6.2                 |                      |
| D.8     | Conexión cruzada                                                                                                                   |                            | C.3.3                | 12.6.3                 |                      |
| D.9     | Unidades terminales: obstrucción y flujo, funcionamiento mecánico, identificación, especificidad del gas                           |                            | C.3.4<br>C.3.5       | 12.6.4<br>12.6.5       |                      |
| D.10    | Conectores NIST, DISS o SIS: obstrucción y flujo, funcionamiento mecánico, identificación, especificidad del gas                   |                            | C.3.4<br>C.3.5       | 12.6.4<br>12.6.5       |                      |
| D.11    | Prestaciones del sistema                                                                                                           |                            | C.3.6<br>C.3.7       | 12.6.6                 |                      |
| D.12    | Válvulas de descarga de presión                                                                                                    |                            | C.3.8                | 12.6.7                 |                      |
| D.13    | Fuentes de suministro                                                                                                              |                            | C.3.9                | 12.6.8                 |                      |
| D.14.1  | Alarmas clínicas y operacionales de emergencia                                                                                     |                            | C.3.10               | 12.6.9                 |                      |
| D.14.2  | Alarmas de funcionamiento                                                                                                          |                            | C.3.10               | 12.6.9                 |                      |
| D.15    | Contaminación por partículas                                                                                                       |                            | C.3.11               | 12.6.10                |                      |

**Representante del fabricante**

Cargo \_\_\_\_\_

Firma \_\_\_\_\_

Fecha \_\_\_/\_\_\_/\_\_\_

Nombre \_\_\_\_\_

**Persona autorizada**

Cargo \_\_\_\_\_

Firma \_\_\_\_\_

Fecha \_\_\_/\_\_\_/\_\_\_

Nombre \_\_\_\_\_

**Impreso D.1.1 – Resumen de los ensayos de los requisitos de los apartados 12.3 y 12.4 [puntos a) al j)], es decir, hasta el apartado 12.6.10 inclusive (véase 12.7.1)**

(Página \_\_\_ de \_\_\_ páginas)

D.1.2

(Instalación sanitaria) \_\_\_\_\_ en (Identificación de la zona) \_\_\_\_\_

Este documento es para certificar que los ensayos y procedimientos siguientes se han efectuado de forma satisfactoria para los sistemas de canalización de gases medicinales y vacío en la instalación sanitaria

| Impreso | Descripción de los ensayos y procedimientos                                                                              | Ensayos requeridos (Si/No) | Procedimiento | Especificación | Fecha de terminación |
|---------|--------------------------------------------------------------------------------------------------------------------------|----------------------------|---------------|----------------|----------------------|
| D.16    | Calidad del aire medicinal producido por los sistemas de suministro con compresor(es) de aire                            |                            | C.3.12        | 12.6.11        |                      |
| D.17    | Calidad del aire motriz para instrumentos quirúrgicos producido por los sistemas de suministro con compresor(es) de aire |                            | C.3.12        | 12.6.12        |                      |
| D.18    | Calidad del aire medicinal producido por los sistemas de suministro con unidad(es) mezcladora(s)                         |                            | C.3.13        | 12.6.13        |                      |
| D.19    | Calidad del oxígeno 93 producido por los sistemas de suministro con concentrador(es) de oxígeno                          |                            | C.3.14        | 12.6.14        |                      |
| D.20    | Llenado con el gas selectivo                                                                                             |                            | C.3.15        | 12.6.15        |                      |
| D.21.1  | Identidad del gas con analizador de oxígeno                                                                              |                            | C.3.16        | 12.6.16        |                      |
| D.21.2  | Identidad del gas con presiones diferentes                                                                               |                            | C.3.16        | 12.6.16        |                      |
| D.21.3  | Identidad del gas con analizador selectivo del gas                                                                       |                            | C.3.16        | 12.6.16        |                      |
|         | Eliminación de las etiquetas de construcción                                                                             |                            |               |                |                      |

**Representante del fabricante**

Cargo \_\_\_\_\_

Firma \_\_\_\_\_

Fecha \_\_/\_\_/\_\_

Nombre \_\_\_\_\_

**Persona autorizada**

Cargo \_\_\_\_\_

Firma \_\_\_\_\_

Fecha \_\_/\_\_/\_\_

Nombre \_\_\_\_\_

**Impreso D.1.2 – Resumen de los ensayos de los requisitos de los apartados 12.6.11 a 12.6.16 (véase 12.7.1)**

(Página \_\_\_ de \_\_\_ páginas)

D.2

(Instalación sanitaria) \_\_\_\_\_ en (Identificación de la zona) \_\_\_\_\_

Este documento es para certificar que los marcados y soportes de la canalización han sido inspeccionados antes de la ocultación.

| Gas medicinal | Sección inspeccionada | Marcados                    | Soportes                    |
|---------------|-----------------------|-----------------------------|-----------------------------|
|               |                       | <i>Conforme/No conforme</i> | <i>Conforme/No conforme</i> |
|               |                       |                             |                             |
|               |                       |                             |                             |
|               |                       |                             |                             |
|               |                       |                             |                             |
|               |                       |                             |                             |
|               |                       |                             |                             |
|               |                       |                             |                             |
|               |                       |                             |                             |
|               |                       |                             |                             |
|               |                       |                             |                             |
|               |                       |                             |                             |
|               |                       |                             |                             |
|               |                       |                             |                             |
|               |                       |                             |                             |
|               |                       |                             |                             |
|               |                       |                             |                             |
|               |                       |                             |                             |

**Representante del fabricante**

Cargo \_\_\_\_\_

Fecha \_\_\_/\_\_\_/\_\_\_

Firma \_\_\_\_\_

Nombre \_\_\_\_\_

**Persona autorizada**

Cargo \_\_\_\_\_

Fecha \_\_\_/\_\_\_/\_\_\_

Firma \_\_\_\_\_

Nombre \_\_\_\_\_

**Impreso D.2 – Inspección de los marcados y soportes de la canalización**

(Página \_\_\_ de \_\_\_ páginas)

D.3

(Instalación sanitaria) \_\_\_\_\_ en (Identificación de la zona) \_\_\_\_\_

Este documento es para certificar que las siguientes canalizaciones de gases medicinales han sido chequeadas antes de la ocultación para el cumplimiento con las especificaciones del diseño

| Gas medicinal | Dimensionamiento de la canalización | Ubicación de        |                                                 |                   |
|---------------|-------------------------------------|---------------------|-------------------------------------------------|-------------------|
|               |                                     | Unidades terminales | Reguladores de presión de la línea (si existen) | Válvulas de corte |
|               |                                     |                     |                                                 |                   |
|               |                                     |                     |                                                 |                   |
|               |                                     |                     |                                                 |                   |
|               |                                     |                     |                                                 |                   |
|               |                                     |                     |                                                 |                   |
|               |                                     |                     |                                                 |                   |
|               |                                     |                     |                                                 |                   |
|               |                                     |                     |                                                 |                   |
|               |                                     |                     |                                                 |                   |
|               |                                     |                     |                                                 |                   |
|               |                                     |                     |                                                 |                   |
|               |                                     |                     |                                                 |                   |
|               |                                     |                     |                                                 |                   |
|               |                                     |                     |                                                 |                   |
|               |                                     |                     |                                                 |                   |
|               |                                     |                     |                                                 |                   |
|               |                                     |                     |                                                 |                   |
|               |                                     |                     |                                                 |                   |

**Representante del fabricante**

Cargo \_\_\_\_\_

Fecha \_\_/\_\_/\_\_

Firma \_\_\_\_\_

Nombre \_\_\_\_\_

**Persona autorizada**

Cargo \_\_\_\_\_

Fecha \_\_/\_\_/\_\_

Firma \_\_\_\_\_

Nombre \_\_\_\_\_

**Impreso D.3 – Comprobación de la conformidad con las especificaciones del diseño**

(Página \_\_\_ de \_\_\_ páginas)

D.4.1

(Instalación sanitaria) \_\_\_\_\_ en (Identificación de la zona) \_\_\_\_\_

Este documento es para certificar que se efectuó un ensayo de integridad mecánica en el(los) sistema(s) de canalización de vacío.

| Sección ensayada | Presión de ensayo | Duración del ensayo | Conforme/<br>No conforme |
|------------------|-------------------|---------------------|--------------------------|
|                  | <i>kPa</i>        | <i>min</i>          |                          |
|                  |                   |                     |                          |
|                  |                   |                     |                          |
|                  |                   |                     |                          |
|                  |                   |                     |                          |
|                  |                   |                     |                          |
|                  |                   |                     |                          |
|                  |                   |                     |                          |
|                  |                   |                     |                          |
|                  |                   |                     |                          |
|                  |                   |                     |                          |
|                  |                   |                     |                          |
|                  |                   |                     |                          |
|                  |                   |                     |                          |
|                  |                   |                     |                          |
|                  |                   |                     |                          |
|                  |                   |                     |                          |
|                  |                   |                     |                          |
|                  |                   |                     |                          |
|                  |                   |                     |                          |

**Representante del fabricante**

Cargo \_\_\_\_\_

Fecha \_\_/\_\_/\_\_

Firma \_\_\_\_\_

Nombre \_\_\_\_\_

**Persona autorizada**

Cargo \_\_\_\_\_

Fecha \_\_/\_\_/\_\_

Firma \_\_\_\_\_

Nombre \_\_\_\_\_

**Impreso D.4.1 – Ensayos de integridad mecánica del sistema de canalización de vacío**











(Página \_\_\_ de \_\_\_ páginas)

D.6.1

(Instalación sanitaria) \_\_\_\_\_ en (Identificación de la zona) \_\_\_\_\_

Estos datos son para certificar que se efectuó un ensayo de integridad mecánica del(de los) sistema(s) de canalización de gases medicinales antes de la ocultación

| Gas medicinal | Sección ensayada | Presión de ensayo | Duración del ensayo | Conforme/<br>No conforme |
|---------------|------------------|-------------------|---------------------|--------------------------|
|               |                  | <i>kPa</i>        | <i>min</i>          |                          |
|               |                  |                   |                     |                          |
|               |                  |                   |                     |                          |

Estos datos son para certificar que se efectuó un ensayo de fugas en el(los) sistema(s) de canalización de gases medicinales antes de la ocultación.

Durante el ensayo, se midieron las presiones mostradas a continuación:

| Gas medicinal | Sección ensayada | Presión de ensayo | Duración del ensayo | Descenso de presión   | Temperatura inicial | Temperatura final | Variación de presión debida a la temperatura | Conforme/<br>No conforme  |
|---------------|------------------|-------------------|---------------------|-----------------------|---------------------|-------------------|----------------------------------------------|---------------------------|
|               |                  | <i>kPa</i>        | <i>h</i>            | $\Delta p$ <i>kPa</i> | $^{\circ}C$         | $^{\circ}C$       | <i>kPa</i>                                   | $\Delta p \leq 0,025\%/h$ |
|               |                  |                   |                     |                       |                     |                   |                                              |                           |
|               |                  |                   |                     |                       |                     |                   |                                              |                           |
|               |                  |                   |                     |                       |                     |                   |                                              |                           |
|               |                  |                   |                     |                       |                     |                   |                                              |                           |
|               |                  |                   |                     |                       |                     |                   |                                              |                           |
|               |                  |                   |                     |                       |                     |                   |                                              |                           |
|               |                  |                   |                     |                       |                     |                   |                                              |                           |
|               |                  |                   |                     |                       |                     |                   |                                              |                           |
|               |                  |                   |                     |                       |                     |                   |                                              |                           |
|               |                  |                   |                     |                       |                     |                   |                                              |                           |
|               |                  |                   |                     |                       |                     |                   |                                              |                           |
|               |                  |                   |                     |                       |                     |                   |                                              |                           |
|               |                  |                   |                     |                       |                     |                   |                                              |                           |
|               |                  |                   |                     |                       |                     |                   |                                              |                           |
|               |                  |                   |                     |                       |                     |                   |                                              |                           |
|               |                  |                   |                     |                       |                     |                   |                                              |                           |
|               |                  |                   |                     |                       |                     |                   |                                              |                           |
|               |                  |                   |                     |                       |                     |                   |                                              |                           |
|               |                  |                   |                     |                       |                     |                   |                                              |                           |

Instrumento(s) de medición utilizado(s) \_\_\_\_\_

**Representante del fabricante**

Cargo \_\_\_\_\_

Firma \_\_\_\_\_

Fecha \_\_/\_\_/\_\_

Nombre \_\_\_\_\_

**Persona autorizada**

Cargo \_\_\_\_\_

Firma \_\_\_\_\_

Fecha \_\_/\_\_/\_\_

Nombre \_\_\_\_\_

**Impreso D.6.1 – Ensayos combinados de fugas y de integridad mecánica de los sistemas de canalización de gases medicinales comprimidos**











(Página \_\_\_ de \_\_\_ páginas)

D.10

(Instalación sanitaria) \_\_\_\_\_ en (Identificación de la zona) \_\_\_\_\_

Este documento es para certificar que los conectores NIST, DISS o SIS siguientes se ensayaron en la canalización del gas medicinal \_\_\_\_\_

Caudal especificado \_\_\_\_\_ l/min. Variación de presión especificada \_\_\_\_\_ kPa.

| Identificación de la sala | Identificación del conector NIST, DISS o SIS | Caudal                   | Variación de presión     | Contrapresión de la variación de presión | Función mecánica         | Identificación           | Especificidad del gas    |
|---------------------------|----------------------------------------------|--------------------------|--------------------------|------------------------------------------|--------------------------|--------------------------|--------------------------|
|                           |                                              | Conforme/<br>No conforme | Conforme/<br>No conforme | Conforme/<br>No conforme                 | Conforme/<br>No conforme | Conforme/<br>No conforme | Conforme/<br>No conforme |
|                           |                                              |                          |                          |                                          |                          |                          |                          |
|                           |                                              |                          |                          |                                          |                          |                          |                          |
|                           |                                              |                          |                          |                                          |                          |                          |                          |
|                           |                                              |                          |                          |                                          |                          |                          |                          |
|                           |                                              |                          |                          |                                          |                          |                          |                          |
|                           |                                              |                          |                          |                                          |                          |                          |                          |
|                           |                                              |                          |                          |                                          |                          |                          |                          |
|                           |                                              |                          |                          |                                          |                          |                          |                          |
|                           |                                              |                          |                          |                                          |                          |                          |                          |
|                           |                                              |                          |                          |                                          |                          |                          |                          |
|                           |                                              |                          |                          |                                          |                          |                          |                          |
|                           |                                              |                          |                          |                                          |                          |                          |                          |
|                           |                                              |                          |                          |                                          |                          |                          |                          |
|                           |                                              |                          |                          |                                          |                          |                          |                          |
|                           |                                              |                          |                          |                                          |                          |                          |                          |
|                           |                                              |                          |                          |                                          |                          |                          |                          |
|                           |                                              |                          |                          |                                          |                          |                          |                          |
|                           |                                              |                          |                          |                                          |                          |                          |                          |

Instrumento(s) de medición utilizado(s)

**Representante del fabricante**

Cargo \_\_\_\_\_

Firma \_\_\_\_\_

Fecha \_\_\_/\_\_\_/\_\_\_

Nombre \_\_\_\_\_

**Persona autorizada**

Cargo \_\_\_\_\_

Firma \_\_\_\_\_

Fecha \_\_\_/\_\_\_/\_\_\_

Nombre \_\_\_\_\_

**Impreso D.10 – Ensayos de ausencia de obstrucción y verificación del caudal, función mecánica, especificidad del gas e identificación de los conectores NIST, DISS o SIS**

(Página \_\_\_ de \_\_\_ páginas)

D.11

(Instalación sanitaria) \_\_\_\_\_ en (Identificación de la zona) \_\_\_\_\_

Este documento es para certificar que la canalización \_\_\_\_\_ se ensayó de la forma siguiente:

Caudal de diseño especificado \_\_\_\_\_ l/min. Caudal de ensayo de la unidad terminal \_\_\_\_\_ l/min.

Presión de distribución nominal \_\_\_\_\_ kPa. Presión de distribución mínima permitida \_\_\_\_\_ kPa

Presión de distribución máxima permitida \_\_\_\_\_ kPa

| Identificación de la sala               | Identificación de la unidad terminal | Especificación cumplida     |
|-----------------------------------------|--------------------------------------|-----------------------------|
|                                         |                                      | <i>Conforme/No conforme</i> |
|                                         |                                      |                             |
|                                         |                                      |                             |
|                                         |                                      |                             |
|                                         |                                      |                             |
|                                         |                                      |                             |
|                                         |                                      |                             |
|                                         |                                      |                             |
|                                         |                                      |                             |
|                                         |                                      |                             |
|                                         |                                      |                             |
|                                         |                                      |                             |
|                                         |                                      |                             |
|                                         |                                      |                             |
|                                         |                                      |                             |
|                                         |                                      |                             |
|                                         |                                      |                             |
| Instrumento(s) de medición utilizado(s) |                                      |                             |

**Representante del fabricante**

Cargo \_\_\_\_\_  
 Fecha \_\_\_/\_\_\_/\_\_\_

Firma \_\_\_\_\_  
 Nombre \_\_\_\_\_

**Persona autorizada**

Cargo \_\_\_\_\_  
 Fecha \_\_\_/\_\_\_/\_\_\_

Firma \_\_\_\_\_  
 Nombre \_\_\_\_\_

**Impreso D.11 – Ensayos o comprobaciones de las prestaciones del sistema**

(Página \_\_\_ de \_\_\_ páginas)

D.12

(Instalación sanitaria) \_\_\_\_\_ en (Identificación de la zona) \_\_\_\_\_

Este documento es para certificar que las válvulas de descarga de presión instaladas en el sistema de canalización se han \_\_\_ inspeccionado / \_\_\_ ensayado con los resultados siguientes:

| <b>Gas medicinal</b> | <b>Identificación de la válvula de descarga de presión</b> | <b>Ubicación</b> | <b>Caudal máximo capaz de descargar</b> | <b>Presión máxima capaz de descargar</b> | <b>Descarga correcta</b> | <b>Presión a la que se vuelve a cerrar</b> |
|----------------------|------------------------------------------------------------|------------------|-----------------------------------------|------------------------------------------|--------------------------|--------------------------------------------|
|                      |                                                            |                  | <i>l/min</i>                            | <i>kPa</i>                               | <i>Sí/No</i>             | <i>kPa</i>                                 |
|                      |                                                            |                  |                                         |                                          |                          |                                            |
|                      |                                                            |                  |                                         |                                          |                          |                                            |
|                      |                                                            |                  |                                         |                                          |                          |                                            |
|                      |                                                            |                  |                                         |                                          |                          |                                            |
|                      |                                                            |                  |                                         |                                          |                          |                                            |
|                      |                                                            |                  |                                         |                                          |                          |                                            |
|                      |                                                            |                  |                                         |                                          |                          |                                            |
|                      |                                                            |                  |                                         |                                          |                          |                                            |
|                      |                                                            |                  |                                         |                                          |                          |                                            |
|                      |                                                            |                  |                                         |                                          |                          |                                            |
|                      |                                                            |                  |                                         |                                          |                          |                                            |
|                      |                                                            |                  |                                         |                                          |                          |                                            |
|                      |                                                            |                  |                                         |                                          |                          |                                            |
|                      |                                                            |                  |                                         |                                          |                          |                                            |
|                      |                                                            |                  |                                         |                                          |                          |                                            |
|                      |                                                            |                  |                                         |                                          |                          |                                            |
|                      |                                                            |                  |                                         |                                          |                          |                                            |
|                      |                                                            |                  |                                         |                                          |                          |                                            |
|                      |                                                            |                  |                                         |                                          |                          |                                            |
|                      |                                                            |                  |                                         |                                          |                          |                                            |

Instrumento(s) de medición utilizado(s)

**Representante del fabricante**

Cargo \_\_\_\_\_  
 Fecha \_\_/\_\_/\_\_

Firma \_\_\_\_\_  
 Nombre \_\_\_\_\_

**Persona autorizada**

Cargo \_\_\_\_\_  
 Fecha \_\_/\_\_/\_\_

Firma \_\_\_\_\_  
 Nombre \_\_\_\_\_

**Impreso D.12 – Ensayos de las válvulas de descarga de presión**

(Página \_\_\_ de \_\_\_ páginas)

D.13

(Instalación sanitaria) \_\_\_\_\_ en (Identificación de la zona) \_\_\_\_\_

Este documento es para certificar que se han inspeccionado/ensayado las fuentes de suministro siguientes:

| Fuente de suministro               | Especificación de la condición de funcionamiento | Conforme/<br>No conforme | Especificación de la condición de emergencia | Conforme/<br>No conforme |
|------------------------------------|--------------------------------------------------|--------------------------|----------------------------------------------|--------------------------|
| Conector de distribución           |                                                  |                          |                                              |                          |
| Conector de distribución           |                                                  |                          |                                              |                          |
| Conector de distribución           |                                                  |                          |                                              |                          |
| Conector de distribución           |                                                  |                          |                                              |                          |
| Conector de distribución           |                                                  |                          |                                              |                          |
| Sistema de oxígeno criogénico      |                                                  |                          |                                              |                          |
| Sistema compresor de aire          |                                                  |                          |                                              |                          |
| Sistema dosificador                |                                                  |                          |                                              |                          |
| Sistema de concentrador de oxígeno |                                                  |                          |                                              |                          |
| Sistema de vacío                   |                                                  |                          |                                              |                          |

**Representante del fabricante**

Cargo \_\_\_\_\_

Fecha \_\_/\_\_/\_\_

Firma \_\_\_\_\_

Nombre \_\_\_\_\_

**Persona autorizada**

Cargo \_\_\_\_\_

Fecha \_\_/\_\_/\_\_

Firma \_\_\_\_\_

Nombre \_\_\_\_\_

**Impreso D.13 – Ensayos de todas las fuentes de suministro**

(Página \_\_\_ de \_\_\_ páginas)

D.14.1

(Instalación sanitaria) \_\_\_\_\_ en (Identificación de la zona) \_\_\_\_\_

Este documento es para certificar que los sistemas de monitorización y alarma se han ensayado y cumplen sus especificaciones.

| Función ensayada                                             | O <sub>2</sub> | N <sub>2</sub> O | Vacío | Aire para uso médico | Aire motriz para instrumentos quirúrgicos | CO <sub>2</sub> | Oxígeno 93 | Nitrógeno motriz para instrumentos quirúrgicos | Mezclas de O <sub>2</sub> /N <sub>2</sub> O |
|--------------------------------------------------------------|----------------|------------------|-------|----------------------|-------------------------------------------|-----------------|------------|------------------------------------------------|---------------------------------------------|
| Presión máxima de la alarma especificada                     |                |                  |       |                      |                                           |                 |            |                                                |                                             |
| Presión máxima de la alarma observada                        |                |                  |       |                      |                                           |                 |            |                                                |                                             |
| Regreso a presión normal desde la presión máxima             |                |                  |       |                      |                                           |                 |            |                                                |                                             |
| Presión mínima de la alarma especificada                     |                |                  |       |                      |                                           |                 |            |                                                |                                             |
| Presión mínima de la alarma observada                        |                |                  |       |                      |                                           |                 |            |                                                |                                             |
| Regreso a presión normal desde la presión mínima             |                |                  |       |                      |                                           |                 |            |                                                |                                             |
| Marcado                                                      |                |                  |       |                      |                                           |                 |            |                                                |                                             |
| Características visuales                                     |                |                  |       |                      |                                           |                 |            |                                                |                                             |
| Características acústicas                                    |                |                  |       |                      |                                           |                 |            |                                                |                                             |
| Todas las funciones de las señales visuales y acústicas      |                |                  |       |                      |                                           |                 |            |                                                |                                             |
| Conexión a la fuente de alimentación eléctrica de emergencia |                |                  |       |                      |                                           |                 |            |                                                |                                             |

**Representante del fabricante**

Cargo \_\_\_\_\_

Fecha \_\_/\_\_/\_\_

Firma \_\_\_\_\_

Nombre \_\_\_\_\_

**Persona autorizada**

Cargo \_\_\_\_\_

Fecha \_\_/\_\_/\_\_

Firma \_\_\_\_\_

Nombre \_\_\_\_\_

**Impreso D.14.1 – Ensayos de las alarmas clínicas y de funcionamiento de emergencia**

(Página \_\_\_ de \_\_\_ páginas)

D.14.2

(Instalación sanitaria) \_\_\_\_\_ en (Identificación de la zona) \_\_\_\_\_

Este documento es para certificar que los sistemas de monitorización y alarma se han ensayado y cumplen sus especificaciones.

| Función ensayada                                                                               | O <sub>2</sub> | N <sub>2</sub> O | Vacío | Aire para uso médico | Aire motriz para instrumentos quirúrgicos | CO <sub>2</sub> | Oxígeno 93 | Nitrógeno motriz para instrumentos quirúrgicos | Mezclas de O <sub>2</sub> /N <sub>2</sub> O |
|------------------------------------------------------------------------------------------------|----------------|------------------|-------|----------------------|-------------------------------------------|-----------------|------------|------------------------------------------------|---------------------------------------------|
| Cambio de los suministros de botellas de primarios a secundarios                               |                |                  |       |                      |                                           |                 |            |                                                |                                             |
| Suministro de botellas primario por debajo de la presión o contenido mínimo                    |                |                  |       |                      |                                           |                 |            |                                                |                                             |
| Suministro de botellas secundario por debajo de la presión o contenido mínimo                  |                |                  |       |                      |                                           |                 |            |                                                |                                             |
| Suministro de botellas de reserva por debajo de la presión o contenido mínimo                  |                |                  |       |                      |                                           |                 |            |                                                |                                             |
| Presión en recipientes por debajo de la mínima                                                 |                |                  |       |                      |                                           |                 |            |                                                |                                             |
| Nivel del líquido en cualquier recipiente criogénico o no criogénico por debajo del mínimo     |                |                  |       |                      |                                           |                 |            |                                                |                                             |
| Nivel del líquido en el recipiente criogénico o no criogénico de reserva por debajo del mínimo |                |                  |       |                      |                                           |                 |            |                                                |                                             |
| Funcionamiento defectuoso de los sistemas compresores de aire                                  |                |                  |       |                      |                                           |                 |            |                                                |                                             |
| Contenido de vapor de agua en el aire suministrado por los sistemas compresores de aire        |                |                  |       |                      |                                           |                 |            |                                                |                                             |
| Funcionamiento defectuoso del sistema mezclador                                                |                |                  |       |                      |                                           |                 |            |                                                |                                             |
| Funcionamiento defectuoso de los sistemas criogénicos                                          |                |                  |       |                      |                                           |                 |            |                                                |                                             |
| Funcionamiento defectuoso de los sistemas de vacío                                             |                |                  |       |                      |                                           |                 |            |                                                |                                             |
| Funcionamiento defectuoso del sistema de suministro de oxígeno 93                              |                |                  |       |                      |                                           |                 |            |                                                |                                             |

**Representante del fabricante**

Cargo \_\_\_\_\_

Firma \_\_\_\_\_

Fecha \_\_/\_\_/\_\_

Nombre \_\_\_\_\_

**Persona autorizada**

Cargo \_\_\_\_\_

Firma \_\_\_\_\_

Fecha \_\_/\_\_/\_\_

Nombre \_\_\_\_\_

**Impreso D.14.2 – Ensayos de las alarmas operacionales**

(Página \_\_\_ de \_\_\_ páginas)

D.15

(Instalación sanitaria) \_\_\_\_\_ en (Identificación de la zona) \_\_\_\_\_

Este documento es para certificar que las canalizaciones de gases medicinales siguientes se han ensayado para determinar la contaminación por partículas.

| <b>Gas medicinal</b>                    | <b>Identificación de la sala</b> | <b>Identificación de la unidad terminal</b> | <b>Partículas visibles</b> |
|-----------------------------------------|----------------------------------|---------------------------------------------|----------------------------|
|                                         |                                  |                                             | <i>Sí/No</i>               |
|                                         |                                  |                                             |                            |
|                                         |                                  |                                             |                            |
|                                         |                                  |                                             |                            |
|                                         |                                  |                                             |                            |
|                                         |                                  |                                             |                            |
|                                         |                                  |                                             |                            |
|                                         |                                  |                                             |                            |
|                                         |                                  |                                             |                            |
|                                         |                                  |                                             |                            |
|                                         |                                  |                                             |                            |
|                                         |                                  |                                             |                            |
|                                         |                                  |                                             |                            |
|                                         |                                  |                                             |                            |
| Instrumento(s) de medición utilizado(s) |                                  |                                             |                            |

**Representante del fabricante**

Cargo \_\_\_\_\_

Fecha \_\_/\_\_/\_\_

Firma \_\_\_\_\_

Nombre \_\_\_\_\_

**Persona autorizada**

Cargo \_\_\_\_\_

Fecha \_\_/\_\_/\_\_

Firma \_\_\_\_\_

Nombre \_\_\_\_\_

**Impreso D.15 – Ensayo de la contaminación por partículas de los sistemas de distribución canalizada**

(Página \_\_\_ de \_\_\_ páginas)

D.16

(Instalación sanitaria) \_\_\_\_\_ en (Identificación de la zona) \_\_\_\_\_

Este documento es para certificar que el aire para uso médico producido por el sistema de suministro con uno o más compresores de aire se ha ensayado antes de llenar la canalización y cumple los requisitos del apartado 5.5.2.1 como se muestra a continuación:

| Concentración de oxígeno                | Aceite total | Contenido en vapor de agua | Monóxido de carbono   | Dióxido de carbono      | Dióxido de azufre     | NO + NO <sub>2</sub>  | Contaminación por partículas |
|-----------------------------------------|--------------|----------------------------|-----------------------|-------------------------|-----------------------|-----------------------|------------------------------|
| ≥ 20,4%<br>≤ 21,4%                      | ≤ 0,1 mg/m   | ≤ 67 ml/m <sup>3</sup>     | ≤ 5 ml/m <sup>3</sup> | ≤ 500 ml/m <sup>3</sup> | ≤ 1 ml/m <sup>3</sup> | ≤ 2 ml/m <sup>3</sup> |                              |
|                                         |              |                            |                       |                         |                       |                       |                              |
| Instrumento(s) de medición utilizado(s) |              |                            |                       |                         |                       |                       |                              |

**Representante del fabricante**

Cargo \_\_\_\_\_

Fecha \_\_/\_\_/\_\_

Firma \_\_\_\_\_

Nombre \_\_\_\_\_

**Persona autorizada**

Cargo \_\_\_\_\_

Fecha \_\_/\_\_/\_\_

Firma \_\_\_\_\_

Nombre \_\_\_\_\_

**Impreso D.16 – Ensayos de la calidad del aire para uso médico producido por sistemas de suministro con uno o más compresores de aire**



(Página \_\_\_ de \_\_\_ páginas)

D.17

(Instalación sanitaria) \_\_\_\_\_ en (Identificación de la zona) \_\_\_\_\_

Este documento es para certificar que el aire motriz para instrumentos quirúrgicos producido por el sistema de suministro con uno o más compresores de aire se ha ensayado antes de llenar la canalización y cumple los requisitos del apartado 5.5.2.3 como se muestra a continuación:

| Aceite total                            | Contenido en vapor de agua |
|-----------------------------------------|----------------------------|
| $\leq 0,1 \text{ mg/m}^3$               | $\leq 67 \text{ ml/m}^3$   |
|                                         |                            |
| Instrumento(s) de medición utilizado(s) |                            |
|                                         |                            |

**Representante del fabricante**

Cargo \_\_\_\_\_

Fecha \_\_/\_\_/\_\_

Firma \_\_\_\_\_

Nombre \_\_\_\_\_

**Persona autorizada**

Cargo \_\_\_\_\_

Fecha \_\_/\_\_/\_\_

Firma \_\_\_\_\_

Nombre \_\_\_\_\_

**Impreso D.17 – Ensayos de la calidad del aire motriz para instrumentos quirúrgicos producido por sistemas de suministro con uno o más compresores de aire**

(Página \_\_\_ de \_\_\_ páginas)

D.18

(Instalación sanitaria) \_\_\_\_\_ en (Identificación de la zona) \_\_\_\_\_

Este documento es para certificar que el aire para uso médico producido por el sistema de suministro con una o más unidades mezcladoras se ha ensayado antes de llenar la canalización y cumple los requisitos del apartado 5.5.3.1 como se muestra a continuación:

| Concentración de oxígeno                | Contenido en vapor de agua |
|-----------------------------------------|----------------------------|
| $\geq 19,95\%$<br>$\leq 23,63\%$        | $\leq 67 \text{ ml/m}^3$   |
| Instrumento(s) de medición utilizado(s) |                            |
|                                         |                            |

**Representante del fabricante**

Cargo \_\_\_\_\_

Fecha \_\_/\_\_/\_\_

Firma \_\_\_\_\_

Nombre \_\_\_\_\_

**Persona autorizada**

Cargo \_\_\_\_\_

Fecha \_\_/\_\_/\_\_

Firma \_\_\_\_\_

Nombre \_\_\_\_\_

**Impreso D.18 – Ensayos de la calidad del aire para uso médico producido por sistemas de suministro con una o más unidades mezcladoras**

(Página \_\_\_ de \_\_\_ páginas)

D.19

(Instalación sanitaria) \_\_\_\_\_ en (Identificación de la zona) \_\_\_\_\_

Este documento es para certificar que la calidad del oxígeno 93 producido por el(los) concentrador(es) de oxígeno se ha ensayado de acuerdo con el apartado 12.6.4 antes de llenar las canalizaciones, con los resultados mostrados a continuación:

| Concentración de oxígeno                | Aceite total            | Contenido en vapor de agua | Monóxido de carbono   | Dióxido de carbono      | Dióxido de azufre     | NO + NO <sub>2</sub>  |
|-----------------------------------------|-------------------------|----------------------------|-----------------------|-------------------------|-----------------------|-----------------------|
| 93% ± 3%                                | ≤ 0,1 mg/m <sup>3</sup> | ≤ 67 ml/m <sup>3</sup>     | ≤ 5 ml/m <sup>3</sup> | ≤ 500 ml/m <sup>3</sup> | ≤ 1 ml/m <sup>3</sup> | ≤ 2 ml/m <sup>3</sup> |
|                                         |                         |                            |                       |                         |                       |                       |
| Instrumento(s) de medición utilizado(s) |                         |                            |                       |                         |                       |                       |

**Representante del fabricante**

Cargo \_\_\_\_\_

Fecha \_\_/\_\_/\_\_

Firma \_\_\_\_\_

Nombre \_\_\_\_\_

**Persona autorizada**

Cargo \_\_\_\_\_

Fecha \_\_/\_\_/\_\_

Firma \_\_\_\_\_

Nombre \_\_\_\_\_

**Impreso D.19 – Ensayos de la calidad del oxígeno 93 producido por uno o más concentradores de oxígeno**

(Página \_\_\_ de \_\_\_ páginas)

D.20

(Instalación sanitaria) \_\_\_\_\_ en (Identificación de la zona) \_\_\_\_\_

Este documento es para certificar que las canalizaciones de gases medicinales siguientes se han llenado con el gas específico como se indica a continuación:

| <b>Gas medicinal</b> | <b>Llenado</b> | <b>Se verifica caudal saliente de todas las unidades terminales observadas</b> |
|----------------------|----------------|--------------------------------------------------------------------------------|
|                      |                |                                                                                |
|                      |                |                                                                                |
|                      |                |                                                                                |
|                      |                |                                                                                |
|                      |                |                                                                                |
|                      |                |                                                                                |
|                      |                |                                                                                |
|                      |                |                                                                                |
|                      |                |                                                                                |
|                      |                |                                                                                |
|                      |                |                                                                                |
|                      |                |                                                                                |
|                      |                |                                                                                |
|                      |                |                                                                                |
|                      |                |                                                                                |
|                      |                |                                                                                |

**Representante del fabricante**

Cargo \_\_\_\_\_

Fecha \_\_/\_\_/\_\_

Firma \_\_\_\_\_

Nombre \_\_\_\_\_

**Persona autorizada**

Cargo \_\_\_\_\_

Fecha \_\_/\_\_/\_\_

Firma \_\_\_\_\_

Nombre \_\_\_\_\_

**Impreso D.20 – Llenado con gas específico**

(Página \_\_\_ de \_\_\_ páginas)

D.21.1

(Instalación sanitaria) \_\_\_\_\_ en (Identificación de la zona) \_\_\_\_\_

Este documento es para certificar que se ha comprobado la identidad del gas en todas las unidades terminales como se muestra a continuación:

| Gas medicinal                             | Concentración de O <sub>2</sub> nominal | Concentración de O <sub>2</sub> medida |
|-------------------------------------------|-----------------------------------------|----------------------------------------|
|                                           | %                                       | %                                      |
| Aire para uso médico                      | 21                                      |                                        |
| Oxígeno                                   | 100                                     |                                        |
| Mezclado de oxígeno - óxido nitroso       | (a especificar)                         |                                        |
| Oxígeno 93                                | ≥ 90                                    |                                        |
| Aire motriz para instrumentos quirúrgicos | 21                                      |                                        |
| Instrumento(s) de medición utilizado(s)   |                                         |                                        |

**Representante del fabricante**

Cargo \_\_\_\_\_

Fecha \_\_/\_\_/\_\_

Firma \_\_\_\_\_

Nombre \_\_\_\_\_

**Persona autorizada**

Cargo \_\_\_\_\_

Fecha \_\_/\_\_/\_\_

Firma \_\_\_\_\_

Nombre \_\_\_\_\_

**Impreso D.21.1 – Ensayos de la identidad del gas utilizando un analizador de oxígeno**

(Página \_\_\_ de \_\_\_ páginas)

D.21.2

(Instalación sanitaria) \_\_\_\_\_ en (Identificación de la zona) \_\_\_\_\_

Este documento es para certificar que se ha comprobado la la identidad del gas en todas las unidades terminales como se muestra a continuación:

| Gas medicinal                                  | Presión utilizada | Presión registrada |
|------------------------------------------------|-------------------|--------------------|
|                                                | <i>kPa</i>        | <i>kPa</i>         |
| Óxido nitroso                                  |                   |                    |
| Dióxido de carbono                             |                   |                    |
| Nitrógeno motriz para instrumentos quirúrgicos |                   |                    |
| Aire para uso médico                           |                   |                    |
| Aire motriz para instrumentos quirúrgicos      |                   |                    |
| Vacío                                          |                   |                    |
| Instrumento(s) de medición utilizado(s)        |                   |                    |

**Representante del fabricante**

Cargo \_\_\_\_\_

Fecha \_\_\_/\_\_\_/\_\_\_

Firma \_\_\_\_\_

Nombre \_\_\_\_\_

**Persona autorizada**

Cargo \_\_\_\_\_

Fecha \_\_\_/\_\_\_/\_\_\_

Firma \_\_\_\_\_

Nombre \_\_\_\_\_

**Impreso D.21.2 – Ensayos de la identidad del gas utilizando presiones diferentes**

(Página \_\_\_ de \_\_\_ páginas)

D.21.3

(Instalación sanitaria) \_\_\_\_\_ en (Identificación de la zona) \_\_\_\_\_

Este documento es para certificar que se ha ensayado la identidad del gas en todas las unidades terminales como se muestra a continuación:

| Gas medicinal                                  | Resultado                   |
|------------------------------------------------|-----------------------------|
|                                                | <i>Conforme/No conforme</i> |
| Óxido nitroso                                  |                             |
| Dióxido de carbono                             |                             |
| Nitrógeno motriz para instrumentos quirúrgicos |                             |
| Instrumento(s) de medición utilizado(s)        |                             |

**Representante del fabricante**

Cargo \_\_\_\_\_

Fecha \_\_/\_\_/\_\_

Firma \_\_\_\_\_

Nombre \_\_\_\_\_

**Persona autorizada**

Cargo \_\_\_\_\_

Fecha \_\_/\_\_/\_\_

Firma \_\_\_\_\_

Nombre \_\_\_\_\_

**Impreso D.21.3 – Ensayos de la identidad del gas utilizando un analizador de oxígeno**

## Anexo E (Informativo)

### Relaciones entre la temperatura y la presión

#### E.1 Fundamento del método

Partiendo de la ley de los gases ideales:

$$\frac{p_2}{T_2} = \frac{p_1}{T_1}$$

y

$$p_2 = (p_1)(T_2 / T_1)$$

donde

$p_1$  es la presión absoluta inicial de la canalización;

$p_2$  es la presión absoluta final de la canalización;

$T_1$  es la temperatura absoluta inicial de la canalización;

$T_2$  es la temperatura absoluta final de la canalización.

NOTA 1 Presión absoluta = presión manométrica + 100 kPa.

NOTA 2 La relación entre la temperatura y la presión a las presiones típicas de una canalización se muestra en la figura E.1.

#### E.2 Ejemplo

Un ejemplo de la corrección utilizando el diagrama en la figura E.1 se da a continuación.

La presión de un sistema previamente a 1 400 kPa descenderá aproximadamente a 1 350 kPa con un descenso de la temperatura de 10 °C. Esto se puede confirmar mediante el cálculo utilizando la ecuación en el capítulo E.1, de la forma siguiente:

donde

$p_1$  es 1 500 kPa (1 400 kPa de presión manométrica);

$T_1$  es 293 K (20 °C) ;

$T_2$  es 283 K (10 °C);

$p_2$  es 1 449 kPa (1 349 kPa de presión manométrica).



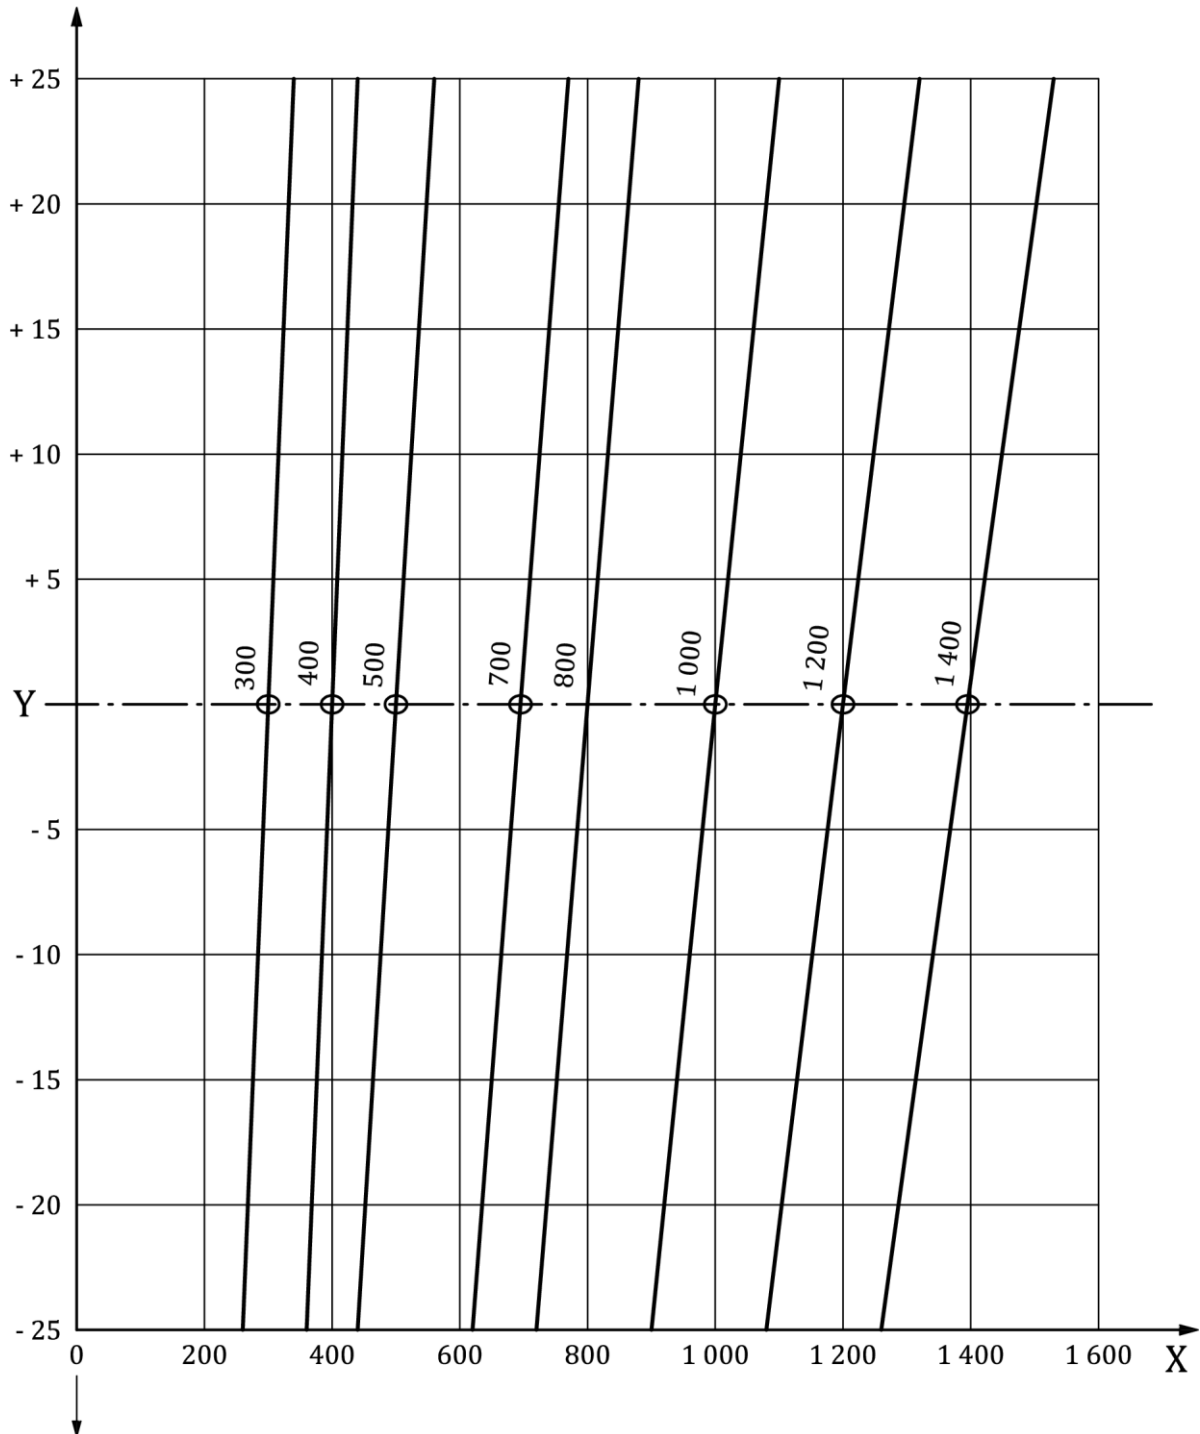

Leyenda

X Presión de la canalización, en kilopascales (kPa)

Y Cambio de temperatura, en grados Celsius (°C)

**Figura E.1 – Relación entre la temperatura y la presión a las presiones típicas de canalización**

## Anexo F (Informativo)

### Lista de comprobación de la gestión del riesgo

#### F.1 Generalidades

La gestión del riesgo se debería efectuar de acuerdo con la Norma ISO 14971.

Este anexo da el procedimiento de gestión del riesgo recomendado y la lista de comprobación utilizada para identificar las causas raíz y las situaciones peligrosas (es decir, la causa del daño) relacionadas con los objetivos de seguridad definidos y las medidas de control del riesgo apropiadas para los sistemas de canalización de gases medicinales.

Tanto el fabricante (M) del sistema de canalización de gases medicinales como el (los) representante(s) de la instalación sanitaria (H) deberían utilizar el procedimiento de gestión del riesgo y la lista de comprobación del control del riesgo durante:

- el diseño, la instalación, la puesta en servicio y el funcionamiento de los sistemas de canalización de gases medicinales nuevos;
- el funcionamiento y la monitorización en curso de los sistemas de canalización de gases medicinales existentes.

#### F.2 Procedimiento de gestión del riesgo

Cuando se gestionan los riesgos asociados con los sistemas de canalización de gases medicinales, es necesario primero completar una determinación del riesgo del sistema global.

Una vez determinados los riesgos (es decir, la combinación de la gravedad y de la probabilidad de ocurrencia del daño), el diseño debería procurar mitigar los riesgos utilizando procedimientos en el orden siguiente de prioridad:

- a) un diseño inherentemente seguro;
- b) las medidas de protección en el propio producto sanitario o en el proceso de fabricación;
- c) la información para la seguridad.

#### F.3 Lista de comprobación de la gestión del riesgo

La tabla F.1<sup>1)</sup> da una lista de los objetivos de seguridad, causas raíz, situaciones peligrosas y medidas de control del riesgo apropiadas típicas para mitigar el riesgo hasta niveles aceptables. Identifica también las organizaciones responsables de emprender las acciones.

---

1) En la tabla F.1, MGPS significa Sistema de canalización de gases medicinales (Medical Gas Pipeline System).

Tabla F.1 – Lista de comprobación de la gestión del riesgo

| Objetivo de seguridad      | Causa raíz                                                                                                            | Situación peligrosa                                                                                                                                                                     | Medidas de control del riesgo                                                                                                                                                                                     | Organización responsable |
|----------------------------|-----------------------------------------------------------------------------------------------------------------------|-----------------------------------------------------------------------------------------------------------------------------------------------------------------------------------------|-------------------------------------------------------------------------------------------------------------------------------------------------------------------------------------------------------------------|--------------------------|
| Continuidad del suministro | Bloqueo parcial o completo de la canalización                                                                         | Pérdida o reducción del suministro al paciente o al equipo                                                                                                                              | Ensayos de descenso del caudal y de la presión en cada unidad terminal antes del uso                                                                                                                              | M                        |
|                            | Pérdida del suministro a partir de la fuente de suministro en funcionamiento<br>Fallo catastrófico de la canalización | Sistema abastecido desde la fuente de reserva/de emergencia si la fuente de suministro primaria falla.<br>Pérdida del suministro a las unidades terminales si fallan todos los sistemas | Garantía de que se incluyen las fuentes de suministro de reserva y de emergencia en el diseño del sistema de suministro                                                                                           | H+M                      |
|                            |                                                                                                                       |                                                                                                                                                                                         | Garantía de que se incluyen las fuentes de suministro de reserva y de emergencia en la capacidad y en la ubicación de las fuentes de suministro                                                                   | H                        |
|                            |                                                                                                                       |                                                                                                                                                                                         | Sistema de gestión del inventario establecido                                                                                                                                                                     | H                        |
|                            |                                                                                                                       |                                                                                                                                                                                         | Sistema de mantenimiento preventivo establecido para cada fuente de suministro                                                                                                                                    | H                        |
|                            |                                                                                                                       |                                                                                                                                                                                         | Procedimientos operacionales establecidos para suministrar botellas en situaciones de emergencia para garantizar la continuidad del suministro                                                                    | H                        |
|                            |                                                                                                                       |                                                                                                                                                                                         | Procedimientos establecidos para minimizar el uso de gases en situaciones de emergencia                                                                                                                           | H                        |
|                            |                                                                                                                       |                                                                                                                                                                                         | Ensayos de rutina de las fuentes de suministro de reserva y de emergencia para garantizar que funcionarán cuando falle la fuente de suministro primaria y secundaria                                              | H                        |
|                            |                                                                                                                       |                                                                                                                                                                                         | Ensayos de rutina del sistema de alarma                                                                                                                                                                           | H                        |
|                            |                                                                                                                       |                                                                                                                                                                                         | El documento de gestión operacional contempla el fallo del suministro                                                                                                                                             | H                        |
|                            | Fallo catastrófico de la canalización                                                                                 | Pérdida total del suministro a las unidades terminales.<br>Pérdida del suministro al paciente y/o al equipo                                                                             | El trazado de la canalización se diseña para limitar las zonas que entrañan un riesgo alto para la canalización                                                                                                   | H+M                      |
|                            |                                                                                                                       |                                                                                                                                                                                         | El trazado de la canalización se diseña para limitar la corrosión de la misma                                                                                                                                     | M                        |
|                            |                                                                                                                       |                                                                                                                                                                                         | Los sistemas de suministro se diseñan para impedir el daño mecánico                                                                                                                                               | H+M                      |
|                            |                                                                                                                       |                                                                                                                                                                                         | Las canalizaciones se dotan de puntos de apoyo para proporcionar el soporte y la protección adecuados y para limitar la corrosión                                                                                 | M                        |
|                            |                                                                                                                       |                                                                                                                                                                                         | Los componentes en contacto directo con las canalizaciones se diseñan para minimizar la corrosión electrolítica                                                                                                   | M                        |
|                            |                                                                                                                       |                                                                                                                                                                                         | El sistema de canalización se conecta a tierra para limitar la corrosión electrolítica                                                                                                                            | M                        |
|                            |                                                                                                                       |                                                                                                                                                                                         | Se identifica la ubicación de las vías de la canalización;<br>Se utilizan marcadores en el suelo por encima de donde discurre la canalización para indicar la presencia de la misma en conductos enterrados, etc. | M                        |
|                            |                                                                                                                       |                                                                                                                                                                                         | Las tuberías se protegen en las zonas de riesgo alto                                                                                                                                                              | H                        |
|                            |                                                                                                                       |                                                                                                                                                                                         | Sistema de obtención de autorización para efectuar el trabajo                                                                                                                                                     | H                        |
|                            |                                                                                                                       |                                                                                                                                                                                         | Ubicación de las fuentes de suministro con respecto a las zonas de utilización                                                                                                                                    | H+M                      |
|                            |                                                                                                                       |                                                                                                                                                                                         | Planes de emergencia para las zonas con pacientes de alta dependencia                                                                                                                                             | H                        |
|                            | Uso de fuentes de suministro local de emergencia adyacentes a los puntos de utilización                               | H                                                                                                                                                                                       |                                                                                                                                                                                                                   |                          |

| Objetivo de seguridad                                                                                        | Causa raíz                                                                                                                                                         | Situación peligrosa                                                                                                                                                                                                                                                                                                                                                   | Medidas de control del riesgo                                                                                                                                                                                                                        | Organización responsable |
|--------------------------------------------------------------------------------------------------------------|--------------------------------------------------------------------------------------------------------------------------------------------------------------------|-----------------------------------------------------------------------------------------------------------------------------------------------------------------------------------------------------------------------------------------------------------------------------------------------------------------------------------------------------------------------|------------------------------------------------------------------------------------------------------------------------------------------------------------------------------------------------------------------------------------------------------|--------------------------|
| Continuidad del suministro                                                                                   | Fallo catastrófico de la canalización                                                                                                                              | Pérdida total del suministro a las unidades terminales.<br>Pérdida del suministro al paciente y/o al equipo                                                                                                                                                                                                                                                           | Uso de puntos de entrada de emergencia cerca de las válvulas de corte de zona                                                                                                                                                                        | H                        |
|                                                                                                              |                                                                                                                                                                    |                                                                                                                                                                                                                                                                                                                                                                       | Ensayos de rutina del sistema de alarma                                                                                                                                                                                                              | H                        |
|                                                                                                              |                                                                                                                                                                    |                                                                                                                                                                                                                                                                                                                                                                       | El documento de gestión operacional contempla los problemas del fallo del suministro de la canalización                                                                                                                                              | H                        |
|                                                                                                              | Dificultades del proveedor del gas.<br><i>Fuerza mayor</i> (por ejemplo, accidente de tráfico en carretera u otras incidencias más allá del control del proveedor) | Entrega tardía de los gases líquidos o en botella.<br>Proveedor incapaz de entregar el producto.<br>Proveedor con inventario insuficiente de botellas o tanque de entrega demasiado pequeño                                                                                                                                                                           | Selección del proveedor del gas utilizando los principios de gestión del riesgo                                                                                                                                                                      | H                        |
|                                                                                                              |                                                                                                                                                                    |                                                                                                                                                                                                                                                                                                                                                                       | Elección del tamaño apropiado del tanque de almacenamiento                                                                                                                                                                                           | H+M                      |
|                                                                                                              |                                                                                                                                                                    |                                                                                                                                                                                                                                                                                                                                                                       | Utilización de telemetría en los tanques de almacenamiento                                                                                                                                                                                           | H                        |
|                                                                                                              |                                                                                                                                                                    |                                                                                                                                                                                                                                                                                                                                                                       | Se establece que la gestión de inventario y los sistemas de renovación de pedidos son adecuados                                                                                                                                                      | H                        |
|                                                                                                              |                                                                                                                                                                    |                                                                                                                                                                                                                                                                                                                                                                       | Número adecuado de botellas almacenadas en la instalación                                                                                                                                                                                            | H                        |
|                                                                                                              |                                                                                                                                                                    |                                                                                                                                                                                                                                                                                                                                                                       | Ubicación apropiada de las zonas de almacenamiento de botellas.                                                                                                                                                                                      | H                        |
|                                                                                                              |                                                                                                                                                                    |                                                                                                                                                                                                                                                                                                                                                                       | Personal capacitado para cambiar las botellas acopladas en los conectores de distribución                                                                                                                                                            | H                        |
|                                                                                                              |                                                                                                                                                                    |                                                                                                                                                                                                                                                                                                                                                                       | Plan de emergencia                                                                                                                                                                                                                                   | H                        |
|                                                                                                              |                                                                                                                                                                    |                                                                                                                                                                                                                                                                                                                                                                       | Revisión de rutina de la planificación de las entregas                                                                                                                                                                                               | H                        |
|                                                                                                              |                                                                                                                                                                    |                                                                                                                                                                                                                                                                                                                                                                       | Revisión de rutina del inventario de la fuente de suministro                                                                                                                                                                                         | H                        |
|                                                                                                              | El documento de gestión operacional contempla los problemas del fallo del suministro                                                                               | H                                                                                                                                                                                                                                                                                                                                                                     |                                                                                                                                                                                                                                                      |                          |
|                                                                                                              | Pedido tardío de los gases líquidos o en botella                                                                                                                   | Gestión inadecuada del nivel de inventario de la instalación sanitaria                                                                                                                                                                                                                                                                                                | Revisión de rutina del inventario de la fuente de suministro                                                                                                                                                                                         | H                        |
|                                                                                                              | Mala ubicación o alojamiento de las fuentes de suministro                                                                                                          | Daño mecánico a las fuentes de suministro que causa la pérdida del suministro.<br>Fuentes de suministro afectadas por un incidente que afecta a una instalación adyacente.<br>Daño potencial a otras fuentes de suministro.<br>Fallo eventual de la fuente de suministro.<br>Acceso a todas las fuentes de suministro bloqueado, originando la pérdida del suministro | Garantía de que las distancias de separación entre las fuentes de suministro cumplen la reglamentación/recomendaciones locales                                                                                                                       | H+M                      |
|                                                                                                              |                                                                                                                                                                    |                                                                                                                                                                                                                                                                                                                                                                       | Se revisan los riesgos asociados con dos fuentes de suministro que estén ubicadas adyacentes entre sí                                                                                                                                                | H+M                      |
|                                                                                                              |                                                                                                                                                                    |                                                                                                                                                                                                                                                                                                                                                                       | Garantía de que las salas de la planta y las salas de conectores de distribución tienen control de la temperatura y ventilación adecuados.<br>Se revisa el control de temperatura de la sala para impedir la estratificación de las mezclas de gases | H                        |
|                                                                                                              |                                                                                                                                                                    |                                                                                                                                                                                                                                                                                                                                                                       | Protección física adecuada frente al daño mecánico                                                                                                                                                                                                   | H+M                      |
|                                                                                                              |                                                                                                                                                                    |                                                                                                                                                                                                                                                                                                                                                                       | Señalización clara para mantener despejadas las zonas de entrega                                                                                                                                                                                     | H                        |
| Procedimientos de la instalación sanitaria para mantener el acceso a las fuentes de suministro               |                                                                                                                                                                    |                                                                                                                                                                                                                                                                                                                                                                       | H                                                                                                                                                                                                                                                    |                          |
| Revisión de rutina de la ubicación del sistema de suministro para garantizar que el sistema permanece seguro |                                                                                                                                                                    |                                                                                                                                                                                                                                                                                                                                                                       | H                                                                                                                                                                                                                                                    |                          |
| Se revisan los riesgos asociados por tener dos fuentes de suministro ubicadas en lugares diferentes          |                                                                                                                                                                    |                                                                                                                                                                                                                                                                                                                                                                       | H                                                                                                                                                                                                                                                    |                          |

| Objetivo de seguridad      | Causa raíz                           | Situación peligrosa                                                                                                 | Medidas de control del riesgo                                                                                                                                                                      | Organización responsable |
|----------------------------|--------------------------------------|---------------------------------------------------------------------------------------------------------------------|----------------------------------------------------------------------------------------------------------------------------------------------------------------------------------------------------|--------------------------|
| Continuidad del suministro | Fallo de las alarmas                 | Condición de alarma no detectada                                                                                    | Fuente de alimentación eléctrica del tipo "sistema de alimentación ininterrumpida" (SAI) para garantizar la continuidad del suministro eléctrico a las alarmas                                     | M                        |
|                            |                                      |                                                                                                                     | Las alarmas se conectan al suministro eléctrico de emergencia para garantizar la continuidad del funcionamiento de la alarma                                                                       | H                        |
|                            |                                      |                                                                                                                     | La visualización de las señales de información ha de ser independiente del sistema de alarma                                                                                                       | M                        |
|                            |                                      |                                                                                                                     | Ensayos de rutina del sistema de alarma                                                                                                                                                            | H                        |
|                            |                                      |                                                                                                                     | Revisión de rutina del sistema de alarma                                                                                                                                                           | H                        |
|                            |                                      |                                                                                                                     | El documento de gestión operacional contempla los problemas del fallo de las alarmas                                                                                                               | H                        |
|                            | Fallo del suministro de electricidad | Fallo de funcionamiento de los componentes eléctricos que hace aumentar la posibilidad de la pérdida del suministro | Fuente de alimentación eléctrica del tipo "sistema de alimentación ininterrumpida" (SAI) o fuente de alimentación eléctrica de emergencia para garantizar la continuidad del sistema eléctrico     | H                        |
|                            |                                      |                                                                                                                     | Se comprueba la capacidad de la fuente de alimentación eléctrica de emergencia                                                                                                                     | H                        |
|                            |                                      |                                                                                                                     | Ensayos de rutina de la fuente de alimentación eléctrica de emergencia                                                                                                                             | H                        |
|                            |                                      |                                                                                                                     | El documento de gestión operacional contempla los problemas del fallo de la fuente de alimentación eléctrica                                                                                       | H                        |
|                            |                                      |                                                                                                                     | Procedimientos para garantizar que se restablece la funcionalidad de todos los componentes después de la restauración de la fuente de alimentación eléctrica                                       | H                        |
|                            |                                      |                                                                                                                     | Se comprueba que las fuentes de suministro de reserva de los compresores o de los concentradores de oxígeno son capaces de mantener el suministro de gas durante un fallo del suministro eléctrico | H                        |
|                            | Fallo de un componente.              | Aumento de la posibilidad de la pérdida de suministro con fallo de los componentes críticos                         | Revisión e identificación de los componentes críticos                                                                                                                                              | M                        |
|                            |                                      |                                                                                                                     | Mantenimiento preventivo selectivo para los componentes críticos                                                                                                                                   | H+M                      |
|                            |                                      |                                                                                                                     | Se obtiene la especificación para los componentes críticos solicitándola a los proveedores aprobados                                                                                               | M                        |
|                            |                                      |                                                                                                                     | Se comprueban los sistemas de alarma para garantizar que se detecta el fallo de los componentes críticos                                                                                           | H                        |
|                            |                                      |                                                                                                                     | Repuestos/repuestos de reserva adecuados para los componentes críticos                                                                                                                             | H                        |
|                            |                                      |                                                                                                                     | El documento de gestión operacional contempla los problemas del fallo de los componentes críticos                                                                                                  | H                        |
|                            | Fallo del sistema de mantenimiento   | Aumento de la posibilidad de fallo de componentes y fallo subsiguiente del sistema de suministro                    | El documento de gestión operacional contempla los problemas del fallo de los componentes críticos                                                                                                  | H                        |

| Objetivo de seguridad                                                                                                                                                         | Causa raíz                                                                      | Situación peligrosa                                                          | Medidas de control del riesgo                                                                                                                     | Organización responsable |
|-------------------------------------------------------------------------------------------------------------------------------------------------------------------------------|---------------------------------------------------------------------------------|------------------------------------------------------------------------------|---------------------------------------------------------------------------------------------------------------------------------------------------|--------------------------|
| Continuidad del suministro                                                                                                                                                    | Fallo del suministro a las zonas con pacientes de alta dependencia              | Riesgo alto para el paciente con fallo del suministro                        | Identificación de las zonas de riesgo alto                                                                                                        | H                        |
|                                                                                                                                                                               |                                                                                 |                                                                              | Revisión de los sistemas de suministro de emergencia a zonas de riesgo alto                                                                       | H                        |
|                                                                                                                                                                               |                                                                                 |                                                                              | Sistema de diseño para proporcionar niveles más altos del inventario de reserva de los componentes críticos                                       | M                        |
|                                                                                                                                                                               |                                                                                 |                                                                              | Comprobación de los sistemas de alarma para garantizar que se detecta el fallo de componentes críticos                                            | H                        |
|                                                                                                                                                                               |                                                                                 |                                                                              | El documento de gestión operacional contempla los problemas del fallo de componentes críticos                                                     | H                        |
|                                                                                                                                                                               |                                                                                 |                                                                              | Capacidad para abastecer zonas localizadas                                                                                                        | H                        |
| Prestaciones del sistema                                                                                                                                                      | Diseño/especificación incorrectos de los componentes y sistemas de canalización | Suministro inadecuado al paciente o al equipo                                | Proporcionar información sobre la utilización                                                                                                     | H                        |
|                                                                                                                                                                               |                                                                                 |                                                                              | Diseño correcto de los componentes/canalizaciones basado en la información sobre la utilización                                                   | M                        |
|                                                                                                                                                                               |                                                                                 |                                                                              | Validación del diseño de acuerdo con el capítulo 12                                                                                               | M                        |
|                                                                                                                                                                               |                                                                                 |                                                                              | Comprobaciones de la puesta en servicio después de la instalación                                                                                 | H+M                      |
|                                                                                                                                                                               |                                                                                 |                                                                              | El documento de gestión operacional contempla las comprobaciones periódicas de la utilización                                                     | H                        |
|                                                                                                                                                                               | Protección inadecuada de las canalizaciones/componentes frente a la corrosión   | Fallo de las canalizaciones/componentes.<br>Fugas.<br>Rotura de los soportes | Se verifica que el diseño/ubicación/protección de las canalizaciones/ y componentes son correctos                                                 | M                        |
|                                                                                                                                                                               |                                                                                 |                                                                              | El documento de gestión operacional contempla la inspección y el mantenimiento periódicos del sistema de canalización de gases medicinales (MGPS) | H                        |
|                                                                                                                                                                               | Fallo del control de presión: presión alta                                      | Presión alta en la unidad terminal                                           | Diseño y ubicación correctos de las válvulas de descarga de presión para protección contra el fallo de componentes                                | M                        |
|                                                                                                                                                                               |                                                                                 |                                                                              | Diseño correcto del sistema de alarma para indicar la condición de alta presión.                                                                  | M                        |
|                                                                                                                                                                               |                                                                                 |                                                                              | El documento de gestión operacional contempla los ensayos y el mantenimiento periódicos de las válvulas de descarga de presión                    | H                        |
|                                                                                                                                                                               |                                                                                 |                                                                              | El documento de gestión operacional contempla las comprobaciones periódicas de la alarma de alta presión                                          | H                        |
|                                                                                                                                                                               |                                                                                 |                                                                              | El documento de gestión operacional contempla la inspección y el mantenimiento periódicos de los reguladores de presión                           | H                        |
| El documento de gestión operacional contempla las comprobaciones de la capacidad del equipo conectado al MGPS para hacer frente al fallo del sistema de control de la presión |                                                                                 |                                                                              | H                                                                                                                                                 |                          |

| Objetivo de seguridad    | Causa raíz                                                     | Situación peligrosa                                                                                                                                                                                  | Medidas de control del riesgo                                                                                                                                          | Organización responsable |
|--------------------------|----------------------------------------------------------------|------------------------------------------------------------------------------------------------------------------------------------------------------------------------------------------------------|------------------------------------------------------------------------------------------------------------------------------------------------------------------------|--------------------------|
| Prestaciones del sistema | Fallo del control de la presión – baja presión                 | Baja presión en la unidad terminal que origina el funcionamiento defectuoso del equipo                                                                                                               | Diseño correcto del sistema de alarma para indicar la condición de baja presión                                                                                        | M                        |
|                          |                                                                |                                                                                                                                                                                                      | El documento de gestión operacional contempla las comprobaciones periódicas de la alarma de baja presión                                                               | H                        |
|                          |                                                                |                                                                                                                                                                                                      | El documento de gestión operacional contempla la inspección y el mantenimiento periódicos de los reguladores de presión                                                | H                        |
|                          | Diseño/especificación incorrectas de las fuentes de suministro | Fallo del suministro. Suministro inadecuado a la canalización                                                                                                                                        | Se proporciona información sobre la utilización                                                                                                                        | H                        |
|                          |                                                                |                                                                                                                                                                                                      | Diseño y dimensionado correctos del suministro basándose en la información sobre la utilización y en las capacidades del proveedor/acuerdos contractuales con el mismo | M                        |
|                          |                                                                |                                                                                                                                                                                                      | Validación del diseño de acuerdo con el capítulo 12                                                                                                                    | M                        |
|                          |                                                                |                                                                                                                                                                                                      | Comprobaciones de la puesta en servicio después de la instalación                                                                                                      | H+M                      |
|                          |                                                                |                                                                                                                                                                                                      | El documento de gestión operacional contempla las comprobaciones periódicas de la instalación, disposición y acceso a las fuentes de suministro                        | H                        |
|                          |                                                                |                                                                                                                                                                                                      | El documento de gestión operacional contempla las comprobaciones periódicas de la utilización para revisar la capacidad de la fuente de suministro                     | H                        |
|                          | Fugas de la canalización                                       | Riesgo potencial de incendio.<br>Riesgo potencial de asfixia.<br>Riesgo potencial de concentraciones altas de gases.<br>Riesgo potencial de suministro inadecuado/reducido a las unidades terminales | Puesta en servicio del sistema                                                                                                                                         | H+M                      |
|                          |                                                                |                                                                                                                                                                                                      | El documento de gestión operacional contempla las comprobaciones periódicas de las fugas del MGPS                                                                      | H                        |
|                          |                                                                |                                                                                                                                                                                                      | El documento de gestión operacional contempla el mantenimiento periódico del MGPS                                                                                      | H                        |
|                          |                                                                |                                                                                                                                                                                                      |                                                                                                                                                                        |                          |

| Objetivo de seguridad                                                                                                                                                                                                                                               | Causa raíz                                                    | Situación peligrosa                                                                                                                                                                                                                                                                                    | Medidas de control del riesgo                                                                                                                                                      | Organización responsable |
|---------------------------------------------------------------------------------------------------------------------------------------------------------------------------------------------------------------------------------------------------------------------|---------------------------------------------------------------|--------------------------------------------------------------------------------------------------------------------------------------------------------------------------------------------------------------------------------------------------------------------------------------------------------|------------------------------------------------------------------------------------------------------------------------------------------------------------------------------------|--------------------------|
| Calidad del gas suministrado al paciente                                                                                                                                                                                                                            | Especificación errónea suministrada a la fuente de suministro | El gas suministrado o fabricado en la instalación no cumple la especificación.<br>El gas suministrado al paciente no tiene la especificación correcta.<br>Botellas/tanques criogénicos móviles erróneos suministrados/conectados al conector de distribución.<br>Gas suministrado a la presión errónea | Producto certificado suministrado por el proveedor del gas                                                                                                                         | H                        |
|                                                                                                                                                                                                                                                                     |                                                               |                                                                                                                                                                                                                                                                                                        | Acuerdos contractuales adecuados con el proveedor del gas                                                                                                                          | H                        |
|                                                                                                                                                                                                                                                                     |                                                               |                                                                                                                                                                                                                                                                                                        | Se comprueba la conexión correcta de las conexiones flexibles con el conector de distribución (conexión selectiva del gas cuando sea posible)                                      | H+M                      |
|                                                                                                                                                                                                                                                                     |                                                               |                                                                                                                                                                                                                                                                                                        | Se comprueba que están aplicadas las etiquetas correctas a las salidas terminales y a las válvulas de corte de zona                                                                | H+M                      |
|                                                                                                                                                                                                                                                                     |                                                               |                                                                                                                                                                                                                                                                                                        | Se comprueba que están aplicadas las señales correctas a las salas de los conectores de distribución, a los tanques criogénicos y a los depósitos de botellas de gases medicinales | H+M                      |
|                                                                                                                                                                                                                                                                     |                                                               |                                                                                                                                                                                                                                                                                                        | Se comprueba que las canalizaciones están marcadas para el gas correcto                                                                                                            | H+M                      |
|                                                                                                                                                                                                                                                                     |                                                               |                                                                                                                                                                                                                                                                                                        | El documento de gestión operacional identifica las responsabilidades del farmacéutico/controlador de la calidad (QC)                                                               | H                        |
|                                                                                                                                                                                                                                                                     |                                                               |                                                                                                                                                                                                                                                                                                        | Diseño correcto de los procesos de mezcla/fabricación de gas efectuados en la propia instalación                                                                                   | M                        |
|                                                                                                                                                                                                                                                                     |                                                               |                                                                                                                                                                                                                                                                                                        | Puesta en servicio de los procesos de mezcla/fabricación de gas efectuados en la propia instalación                                                                                | H+M                      |
|                                                                                                                                                                                                                                                                     |                                                               |                                                                                                                                                                                                                                                                                                        | El documento de gestión operacional identifica el mantenimiento correcto de las mezclas de gas/procesos de fabricación efectuados en la propia instalación                         | H                        |
|                                                                                                                                                                                                                                                                     |                                                               |                                                                                                                                                                                                                                                                                                        | El documento de gestión operacional identifica los ensayos correctos del gas mezclado/fabricado en la propia instalación                                                           | H                        |
|                                                                                                                                                                                                                                                                     |                                                               |                                                                                                                                                                                                                                                                                                        | El documento de gestión operacional especifica los procedimientos correctos para conectar la fuente de suministro al conector de distribución                                      | H+M                      |
|                                                                                                                                                                                                                                                                     |                                                               |                                                                                                                                                                                                                                                                                                        | El documento de gestión operacional revisa los requisitos de la calidad para los gases suministrados en la instalación                                                             | H                        |
| El documento de gestión operacional especifica que no se deberían utilizar adaptadores                                                                                                                                                                              | H                                                             |                                                                                                                                                                                                                                                                                                        |                                                                                                                                                                                    |                          |
| El documento de gestión operacional especifica que no se debería hacer el transvase desde una botella grande a una o más botellas más pequeñas y que el transvase de líquido criogénico se debería hacer de acuerdo con las instrucciones del fabricante del equipo | H                                                             |                                                                                                                                                                                                                                                                                                        |                                                                                                                                                                                    |                          |



| Objetivo de seguridad                    | Causa raíz                                                        | Situación peligrosa                                                                                                                                                                                                                                                                                                                                       | Medidas de control del riesgo                                                                                                                                                                                       | Organización responsable |
|------------------------------------------|-------------------------------------------------------------------|-----------------------------------------------------------------------------------------------------------------------------------------------------------------------------------------------------------------------------------------------------------------------------------------------------------------------------------------------------------|---------------------------------------------------------------------------------------------------------------------------------------------------------------------------------------------------------------------|--------------------------|
| Calidad del gas suministrado al paciente | Contaminación de los gases                                        | Gases contaminados por componentes no limpiados hasta un grado de limpieza apropiado.<br>Agente de limpieza que quedó en un componente o en las canalizaciones.<br>El purgado tras la construcción no cumple la especificación.<br>Contaminación proveniente de compresores/bombas de vacío/concentradores de oxígeno/elevadores de la presión de oxígeno | Procedimientos correctos para alcanzar el nivel correcto de limpieza que asegure la limpieza y el purgado adecuados                                                                                                 | M                        |
|                                          |                                                                   |                                                                                                                                                                                                                                                                                                                                                           | Procedimientos de ensayo correctos identificados para demostrar que los sistemas acondicionadores funcionan correctamente                                                                                           | H+M                      |
|                                          |                                                                   |                                                                                                                                                                                                                                                                                                                                                           | Puesta en servicio del MGPS para garantizar el grado de limpieza/purgado correcto                                                                                                                                   | H+M                      |
|                                          |                                                                   |                                                                                                                                                                                                                                                                                                                                                           | El documento de gestión operacional identifica que los procedimientos de limpieza y los requisitos de ensayo son correctos                                                                                          | H                        |
|                                          |                                                                   |                                                                                                                                                                                                                                                                                                                                                           | El documento de gestión operacional identifica el mantenimiento correcto de los compresores de gas/bombas de vacío/elevadores de la presión de oxígeno                                                              | H                        |
|                                          |                                                                   |                                                                                                                                                                                                                                                                                                                                                           | El documento de gestión operacional identifica los procedimientos de ensayo correctos para los contaminantes posibles en el aire para uso médico                                                                    | H                        |
|                                          |                                                                   |                                                                                                                                                                                                                                                                                                                                                           | Procedimiento correcto para validar la limpieza de los componentes utilizados dentro del MGPS                                                                                                                       | H+M                      |
|                                          |                                                                   |                                                                                                                                                                                                                                                                                                                                                           | Se utilizan componentes que cumplen los requisitos de limpieza especificados en esta parte de la Norma ISO 7396.<br>Ubicación correcta de la toma al(a los) compresor(es) de aire                                   | H+M                      |
|                                          |                                                                   |                                                                                                                                                                                                                                                                                                                                                           | Funcionamiento correcto de la unidad de purificación de aire/lecho filtrante                                                                                                                                        | H                        |
|                                          | Contaminación de los gases                                        | Bloqueo de los filtros utilizados en componentes del sistema, que origina una reducción del caudal.<br>Fallo de componentes (reguladores de presión, etc.).<br>Fugas de gas a través de componentes o conexiones.<br>Funcionamiento defectuoso de la unidad/lecho filtrante de purificación del aire                                                      | Procedimientos y especificación correctos de la limpieza de los tubos y componentes y para comprobar los filtros después de la puesta en servicio                                                                   | M                        |
|                                          |                                                                   |                                                                                                                                                                                                                                                                                                                                                           | Procedimientos de ensayo correctos identificados para demostrar que los filtros no están bloqueados (y que no existe una cantidad excesiva de partículas en el sistema)                                             | M                        |
|                                          |                                                                   |                                                                                                                                                                                                                                                                                                                                                           | El documento de gestión operacional identifica los procedimientos de limpieza/sustitución del filtro correctos y los requisitos de ensayo adecuados para los filtros del MGPS                                       | H                        |
|                                          |                                                                   |                                                                                                                                                                                                                                                                                                                                                           | El documento de gestión operacional identifica los procedimientos de limpieza/sustitución del filtro correctos y los requisitos de ensayo adecuados para los filtros de los productos sanitarios conectados al MGPS | H                        |
|                                          |                                                                   |                                                                                                                                                                                                                                                                                                                                                           | El documento de gestión operacional identifica el mantenimiento correcto de los filtros                                                                                                                             | H                        |
|                                          | Ignición/ descomposición de los componentes utilizados en el MGPS | Gases tóxicos liberados en la corriente de gas                                                                                                                                                                                                                                                                                                            | Se comprueba que todos los componentes utilizados cumplen la Norma ISO 15001                                                                                                                                        | M                        |
|                                          |                                                                   |                                                                                                                                                                                                                                                                                                                                                           | El documento de gestión operacional garantiza que todos los repuestos de sustitución utilizados en el MGPS cumplen la Norma ISO 15001                                                                               | H                        |

| Objetivo de seguridad                                                                                                                                                                                                                                        | Causa raíz                           | Situación peligrosa                                                                                                                 | Medidas de control del riesgo                                                                                                                                                            | Organización responsable                                                                                             |
|--------------------------------------------------------------------------------------------------------------------------------------------------------------------------------------------------------------------------------------------------------------|--------------------------------------|-------------------------------------------------------------------------------------------------------------------------------------|------------------------------------------------------------------------------------------------------------------------------------------------------------------------------------------|----------------------------------------------------------------------------------------------------------------------|
| Calidad del gas suministrado al paciente                                                                                                                                                                                                                     | Reflujo de gases dentro del MGPS     | Pérdida potencial del suministro al paciente. Contaminación potencial de la fuente de suministro o del gas suministrado al paciente | Diseño correcto del MGPS para impedir el reflujo de los gases                                                                                                                            | M                                                                                                                    |
|                                                                                                                                                                                                                                                              |                                      |                                                                                                                                     | Se efectúan comprobaciones de la puesta en servicio para demostrar las prestaciones de cualquier dispositivo que impida el reflujo o los ajustes de la diferencia de presiones           | H+M                                                                                                                  |
|                                                                                                                                                                                                                                                              |                                      |                                                                                                                                     | El documento de gestión operacional identifica los ensayos y el mantenimiento correctos de los dispositivos que impiden el reflujo y los ajustes adecuados de la diferencia de presiones | H                                                                                                                    |
|                                                                                                                                                                                                                                                              | Suministro del gas medicinal erróneo | Riesgo potencial de asfixia                                                                                                         | En el documento de gestión operacional se prohíbe la utilización de adaptadores                                                                                                          | H                                                                                                                    |
|                                                                                                                                                                                                                                                              |                                      |                                                                                                                                     | Garantía de que no existe reflujo en los productos sanitarios conectados al MGPS                                                                                                         | H                                                                                                                    |
|                                                                                                                                                                                                                                                              | Conexiones cruzadas entre los MGPS   | Contaminación de la fuente de suministro o del gas suministrado al paciente                                                         | Diseño correcto del MGPS para impedir las conexiones cruzadas                                                                                                                            | M                                                                                                                    |
|                                                                                                                                                                                                                                                              |                                      |                                                                                                                                     | Se efectúa la puesta en servicio del MGPS para demostrar que no existen conexiones cruzadas                                                                                              | H+M                                                                                                                  |
|                                                                                                                                                                                                                                                              |                                      |                                                                                                                                     | El documento de gestión operacional contempla el control de la contaminación cruzada cuando se modifica/amplía el sistema                                                                | H                                                                                                                    |
|                                                                                                                                                                                                                                                              | Funcionamiento del sistema           | Funcionamiento/mantenimiento incorrecto del MGPS                                                                                    | Calidad incorrecta del gas/vacío suministrado al paciente. Fallo del suministro al paciente                                                                                              | Se definen los procedimientos correctos en el documento de gestión operacional para cada sección/componente del MGPS |
| Se definen las responsabilidades de todo el personal asociado y de todos usuarios del MGPS                                                                                                                                                                   |                                      |                                                                                                                                     |                                                                                                                                                                                          | H                                                                                                                    |
| Se definen los requisitos de la capacitación a impartir a todo el personal asociado y todos los usuarios del MGPS                                                                                                                                            |                                      |                                                                                                                                     |                                                                                                                                                                                          | H                                                                                                                    |
| Garantía de que todas las válvulas de corte de zona, paneles de control y paneles de alarma están ubicados en un lugar apropiado y están correctamente etiquetados                                                                                           |                                      |                                                                                                                                     |                                                                                                                                                                                          | H+M                                                                                                                  |
| Se imparte capacitación a todo el personal asociado y todos los usuarios del MGPS                                                                                                                                                                            |                                      |                                                                                                                                     |                                                                                                                                                                                          | H                                                                                                                    |
| El documento de gestión operacional especifica la necesidad de evaluar la competencia de todo el personal asociado y todos los usuarios del MGPS y especifica los requisitos del programa de reciclaje y la conservación de los registros de la capacitación |                                      |                                                                                                                                     |                                                                                                                                                                                          | H                                                                                                                    |
| Recursos insuficientes para hacer funcionar y gestionar el MGPS                                                                                                                                                                                              |                                      | Calidad incorrecta del gas/vacío suministrado al paciente. Fallo del suministro al paciente o al equipo.                            | Se revisan los requisitos de dotación de personal para el funcionamiento seguro del MGPS (personal en horario normal de trabajo y fuera del horario normal de trabajo)                   | H                                                                                                                    |
|                                                                                                                                                                                                                                                              |                                      |                                                                                                                                     | El documento de gestión operacional especifica la necesidad de revisar con regularidad los requisitos de dotación de personal                                                            | H                                                                                                                    |

| Objetivo de seguridad      | Causa raíz                                                                                                                                    | Situación peligrosa                                                                                                                                                                         | Medidas de control del riesgo                                                                                                                                                                                                                                                                                  | Organización responsable |
|----------------------------|-----------------------------------------------------------------------------------------------------------------------------------------------|---------------------------------------------------------------------------------------------------------------------------------------------------------------------------------------------|----------------------------------------------------------------------------------------------------------------------------------------------------------------------------------------------------------------------------------------------------------------------------------------------------------------|--------------------------|
| Funcionamiento del sistema | Acción inapropiada tomada tras producirse una condición de emergencia en el MGPS                                                              | Calidad incorrecta del gas/vacío suministrado al paciente.<br>Fallo del suministro al paciente                                                                                              | Se definen los procedimientos correctos para el funcionamiento del MGPS en una condición de emergencia                                                                                                                                                                                                         | H+M                      |
|                            |                                                                                                                                               |                                                                                                                                                                                             | Se definen los requisitos de la formación para actuaciones de emergencia para todo el personal asociado y todos los usuarios del MGPS                                                                                                                                                                          | H                        |
|                            |                                                                                                                                               |                                                                                                                                                                                             | Se imparte la capacitación para actuaciones de emergencia a todo el personal asociado y todos los usuarios del MGPS                                                                                                                                                                                            | H                        |
|                            |                                                                                                                                               |                                                                                                                                                                                             | El documento de gestión operacional especifica la necesidad de evaluar la competencia de todo el personal asociado y todos los usuarios del MGPS para actuaciones de emergencia y especifica los requisitos del programa de reciclaje y la conservación de los registros de la capacitación                    | H                        |
|                            | Fuga de la canalización                                                                                                                       | Riesgo potencial de incendio.<br>Riesgo potencial de asfixia.<br>Riesgo potencial de altas concentraciones de gases.<br>Riesgo de suministro inadecuado/reducido a las unidades terminales. | Necesidad de disponer de un analizador de oxígeno ambiental con alarma si está situado dentro del edificio                                                                                                                                                                                                     | M+H                      |
|                            |                                                                                                                                               |                                                                                                                                                                                             | El documento de gestión operacional contempla las comprobaciones periódicas de la ausencia de fugas del MGPS                                                                                                                                                                                                   | H                        |
| Continuidad del suministro | Pérdida del suministro eléctrico del sistema de producción de gas en la propia instalación o del compresor elevador de presión de tal sistema | El sistema de producción de gas en la propia instalación queda interrumpido y conduce a la pérdida del abastecimiento a la canalización.                                                    | El generador de energía eléctrica de emergencia debe tener el tamaño adecuado para garantizar que el sistema de producción de gas en la propia instalación es el requerido para mantener el suministro                                                                                                         | H                        |
|                            |                                                                                                                                               |                                                                                                                                                                                             | El almacenamiento/fuente de suministro de oxígeno de apoyo, requerido para permitir la activación del generador de apoyo que impida el fallo del suministro, se verifica que es adecuado.                                                                                                                      | M                        |
|                            |                                                                                                                                               |                                                                                                                                                                                             | Se comprueba la capacidad de la fuente de alimentación eléctrica de emergencia                                                                                                                                                                                                                                 | H                        |
|                            |                                                                                                                                               |                                                                                                                                                                                             | Se requiere efectuar ensayos de rutina de la fuente de alimentación eléctrica de emergencia                                                                                                                                                                                                                    | H                        |
|                            | Fallo del sistema/componentes del sistema de producción de gas en la propia instalación                                                       | El sistema de producción de gas en la propia instalación queda interrumpido y conduce a la pérdida del abastecimiento a la canalización.                                                    | Se requiere una segunda/tercera fuente de suministro para mantener el abastecimiento del sistema de canalización hasta que el sistema de producción de gas en la propia instalación o sus componentes (tales como el compresor de aire, válvulas, panel de control, analizadores) se puedan reparar/sustituir. | H                        |
|                            |                                                                                                                                               |                                                                                                                                                                                             | Si la segunda fuente de suministro es un concentrador, es necesario que el almacenamiento/tercera fuente de suministro tenga capacidad suficiente para permitir que la segunda unidad concentradora comience a funcionar y sea capaz de mantener el caudal de suministro                                       | H                        |
|                            | Pérdida de suministro eléctrico del sistema de alarma.                                                                                        | No se alerta a la instalación sanitaria del fallo del suministro potencial.                                                                                                                 | Se requiere un sistema SAI para mantener el suministro eléctrico al sistema de alarma                                                                                                                                                                                                                          | H+M                      |
|                            |                                                                                                                                               |                                                                                                                                                                                             | Se requiere efectuar ensayos de rutina del sistema de alarma                                                                                                                                                                                                                                                   | H                        |
|                            |                                                                                                                                               |                                                                                                                                                                                             | Se requiere que el documento de gestión operacional contemple cómo resolver los problemas derivados del fallo de la alarma                                                                                                                                                                                     | H                        |
|                            |                                                                                                                                               |                                                                                                                                                                                             | Se requieren procedimientos para garantizar que todos los componentes quedan en condiciones correctas de funcionamiento después del restablecimiento del suministro eléctrico                                                                                                                                  | H                        |

| Objetivo de seguridad                                              | Causa raíz                                                                                                  | Situación peligrosa                                                                                                                                                                                                                                                                                                                                                                                  | Medidas de control del riesgo                                                                                                                                       | Organización responsable |
|--------------------------------------------------------------------|-------------------------------------------------------------------------------------------------------------|------------------------------------------------------------------------------------------------------------------------------------------------------------------------------------------------------------------------------------------------------------------------------------------------------------------------------------------------------------------------------------------------------|---------------------------------------------------------------------------------------------------------------------------------------------------------------------|--------------------------|
| Continuidad del suministro                                         | Pérdida del suministro eléctrico al panel de control incluido el panel de análisis                          | Fallo del sistema de producción de gas en la propia instalación                                                                                                                                                                                                                                                                                                                                      | Sistema SAI para mantener el suministro eléctrico al panel de control                                                                                               | M                        |
|                                                                    |                                                                                                             |                                                                                                                                                                                                                                                                                                                                                                                                      | Procedimientos para garantizar que se restablece la funcionalidad de todos los componentes después de la restauración de la fuente de alimentación eléctrica        | H                        |
|                                                                    | Fallo de la red de tuberías internas en la salida del sistema de producción de gas en la propia instalación | Pérdida del abastecimiento a la canalización que produce niveles altos de enriquecimiento de oxígeno que es causa de incendio potencial                                                                                                                                                                                                                                                              | Necesidad de un analizador de oxígeno ambiental con alarma si está situado dentro del edificio.                                                                     | H                        |
|                                                                    | Gas de desecho purgado dentro del edificio que aloja a la unidad del concentrador de oxígeno                | Alto enriquecimiento de nitrógeno dentro del edificio que es causa de asfixia.                                                                                                                                                                                                                                                                                                                       | Necesidad de un analizador de oxígeno ambiental con alarma si está situado dentro del edificio                                                                      | H+M                      |
|                                                                    | Mala elección de la ubicación del sistema de producción de gas en la propia instalación                     | Aumento del potencial de una concentración de contaminantes atmosféricos que puede originar el deterioro del material del lecho filtrante.<br>Pérdida de la calidad del producto que crea una mayor posibilidad de que se produzcan niveles altos de contaminantes tóxicos (tales como CO) en el suministro de oxígeno                                                                               | Requisitos para monitorizar que la concentración de contaminantes en oxígeno cumple los requisitos de la farmacopea/especificación expresada en la norma pertinente | M                        |
|                                                                    |                                                                                                             |                                                                                                                                                                                                                                                                                                                                                                                                      | Garantía de que la regulación de la temperatura y la ventilación en la sala de control son adecuadas                                                                | M                        |
|                                                                    |                                                                                                             |                                                                                                                                                                                                                                                                                                                                                                                                      | Revisión de la regulación de la temperatura en la sala de control para garantizar que el analizador funciona correctamente                                          | H                        |
|                                                                    | Mala elección de la ubicación del sistema de producción de gas en la propia instalación.                    | Daño mecánico sufrido por las fuentes de suministro que causa la pérdida del abastecimiento de gas.<br>Fuentes de suministro afectadas por un incidente que afecta a una instalación adyacente.<br>Daño potencial a otras fuentes de suministro.<br>Fallo eventual de la fuente de suministro.<br>Acceso bloqueado a todas las fuentes de suministro, que causa la pérdida del abastecimiento de gas | Garantía de que la regulación de la temperatura y la ventilación en las salas de la planta y en las salas de conectores de distribución son adecuadas               | H+M                      |
|                                                                    |                                                                                                             |                                                                                                                                                                                                                                                                                                                                                                                                      | Revisión de la regulación de la temperatura en la sala de control para garantizar que el analizador funciona correctamente                                          | H                        |
|                                                                    |                                                                                                             |                                                                                                                                                                                                                                                                                                                                                                                                      | Cuando parte de la planta está ubicada fuera de la misma, la planta necesita protección contra daños mecánicos                                                      | H                        |
|                                                                    |                                                                                                             |                                                                                                                                                                                                                                                                                                                                                                                                      | Procedimientos de la instalación para mantener el acceso a las fuentes de suministro                                                                                | H                        |
|                                                                    |                                                                                                             |                                                                                                                                                                                                                                                                                                                                                                                                      | Revisión de rutina de la ubicación del sistema de suministro para garantizar que permanece seguro.                                                                  | H                        |
|                                                                    | Fallo de un componente                                                                                      | Aumento de la posibilidad de la pérdida del abastecimiento con fallo de componentes críticos                                                                                                                                                                                                                                                                                                         | La especificación de los componentes críticos se obtiene de proveedores aprobados                                                                                   | H+M                      |
|                                                                    |                                                                                                             |                                                                                                                                                                                                                                                                                                                                                                                                      | Comprobación de los sistemas de alarma para garantizar que se detecta el fallo de componentes críticos                                                              | H                        |
| Repuestos/repuestos de reserva adecuados para componentes críticos |                                                                                                             |                                                                                                                                                                                                                                                                                                                                                                                                      | H                                                                                                                                                                   |                          |
| Fallo del sistema de mantenimiento                                 | Fallo potencial de componentes y fallo subsiguiente del sistema de suministro                               | El documento de gestión operacional contempla las cuestiones relacionadas con componentes críticos                                                                                                                                                                                                                                                                                                   | H                                                                                                                                                                   |                          |

| Objetivo de seguridad      | Causa raíz                                                                                              | Situación peligrosa                                                                                                                                                                                  | Medidas de control del riesgo                                                                                                                                                                                                                         | Organización responsable |
|----------------------------|---------------------------------------------------------------------------------------------------------|------------------------------------------------------------------------------------------------------------------------------------------------------------------------------------------------------|-------------------------------------------------------------------------------------------------------------------------------------------------------------------------------------------------------------------------------------------------------|--------------------------|
| Continuidad del suministro | Compresor elevador de presión no disponible cuando la fuente primaria y secundaria no están disponibles | No existe gas disponible para que el compresor elevador de presión eleve la presión en el depósito de oxígeno 93 (tercera fuente)                                                                    | Dimensionamiento de la tercera fuente para cubrir las situaciones en las que no existe gas para elevar la presión (cuando la fuente primaria no está disponible y la fuente secundaria no está operativa por mantenimiento)                           | M+H                      |
|                            |                                                                                                         |                                                                                                                                                                                                      | Dimensionamiento de la unidad concentradora de oxígeno para proporcionar caudal suficiente que permita que se cumplan los requisitos de la canalización a la par que proporciona gas suficiente para hacer funcionar el compresor elevador de presión | M                        |
|                            |                                                                                                         |                                                                                                                                                                                                      | Dimensionamiento de la unidad de suministro de reserva de botellas que tenga en cuenta la disponibilidad del producto cuando se efectúa el llenado                                                                                                    | M+H                      |
|                            | Cambios a través del tiempo en la demanda de oxígeno en la instalación                                  | Falta de oxígeno disponible en cualquier fuente de suministro                                                                                                                                        | Dimensionamiento de la unidad concentradora de oxígeno que tenga en cuenta cualquier crecimiento planificado de la demanda de utilización de oxígeno.                                                                                                 | M+H                      |
| Funcionamiento del sistema | Diseño/especificación incorrecta de los componentes y los sistemas de canalización                      | Abastecimiento de gas inadecuado al sistema de canalización                                                                                                                                          | Proporcionar información sobre la utilización                                                                                                                                                                                                         | H                        |
|                            |                                                                                                         |                                                                                                                                                                                                      | Diseño correcto de componentes/canalizaciones basado en la información sobre la utilización                                                                                                                                                           | M                        |
|                            |                                                                                                         |                                                                                                                                                                                                      | Validación del dimensionamiento y funcionamiento de acuerdo con el capítulo 12                                                                                                                                                                        | M+H                      |
|                            |                                                                                                         |                                                                                                                                                                                                      | El documento de gestión operacional contempla las comprobaciones periódicas de la utilización                                                                                                                                                         | H                        |
|                            | Fallo del control de la presión que causa que la presión de la canalización sea baja                    | Presión baja en el sistema de canalización que causa una presión baja en la canalización/requiere el cambio frecuente de la conexión para recibir el suministro desde la fuente secundaria           | Garantía de que el diseño de la unidad concentradora de oxígeno tiene capacidad suficiente para mantener la presión mínima de la canalización                                                                                                         | M+H                      |
|                            |                                                                                                         |                                                                                                                                                                                                      | Garantía de que el diseño del sistema de alarma indica la condición de presión baja                                                                                                                                                                   | M                        |
|                            |                                                                                                         |                                                                                                                                                                                                      | El documento de gestión operacional contempla las comprobaciones periódicas de la alarma por presión baja                                                                                                                                             | H                        |
|                            |                                                                                                         |                                                                                                                                                                                                      | El documento de gestión operacional contempla la inspección y mantenimiento periódicos de las unidades concentradoras de oxígeno                                                                                                                      | H                        |
|                            | Fugas de la canalización                                                                                | Riesgo potencial de incendio.<br>Riesgo potencial de asfixia.<br>Riesgo potencial de concentraciones altas de gases.<br>Riesgo potencial de suministro inadecuado/reducido a las unidades terminales | Necesidad de un analizador de oxígeno ambiental con alarma si está situado dentro del edificio                                                                                                                                                        | H                        |
|                            |                                                                                                         |                                                                                                                                                                                                      | El documento de gestión operacional contempla las comprobaciones periódicas de las fugas del MGPS                                                                                                                                                     | H                        |

| Objetivo de seguridad                    | Causa raíz                                                                                         | Situación peligrosa                                                                                                                                                                                                                                                                                                                                                                                                                                           | Medidas de control del riesgo                                                                                                                                                                                                        | Organización responsable |
|------------------------------------------|----------------------------------------------------------------------------------------------------|---------------------------------------------------------------------------------------------------------------------------------------------------------------------------------------------------------------------------------------------------------------------------------------------------------------------------------------------------------------------------------------------------------------------------------------------------------------|--------------------------------------------------------------------------------------------------------------------------------------------------------------------------------------------------------------------------------------|--------------------------|
| Calidad del gas suministrado al paciente | Especificación errónea suministrada desde el sistema de producción de gas en la propia instalación | El gas fabricado en la propia instalación no cumple la especificación correcta.<br>Gas suministrado a la presión equivocada                                                                                                                                                                                                                                                                                                                                   | Competencias del farmacéutico (o director ejecutivo) de la instalación sanitaria establecidas y monitorizadas                                                                                                                        | H                        |
|                                          |                                                                                                    |                                                                                                                                                                                                                                                                                                                                                                                                                                                               | El documento de gestión operacional identifica las responsabilidades del control de la calidad y de la persona autorizada de la instalación sanitaria que garantizan que la calidad del producto cumple la especificación pertinente | H                        |
|                                          |                                                                                                    |                                                                                                                                                                                                                                                                                                                                                                                                                                                               | Verificación del correcto diseño de los procesos de fabricación completada y aprobada                                                                                                                                                | H                        |
|                                          |                                                                                                    |                                                                                                                                                                                                                                                                                                                                                                                                                                                               | Puesta en servicio/validación de los procesos de fabricación completada en la instalación                                                                                                                                            | H                        |
|                                          |                                                                                                    |                                                                                                                                                                                                                                                                                                                                                                                                                                                               | Capacitación adecuada de todos los operadores sobre la forma correcta de trabajar con la unidad concentradora de oxígeno                                                                                                             | H                        |
|                                          |                                                                                                    |                                                                                                                                                                                                                                                                                                                                                                                                                                                               | El documento de gestión operacional identifica el mantenimiento correcto de los procesos de fabricación de la unidad concentradora de oxígeno efectuados en la propia instalación                                                    | H                        |
|                                          |                                                                                                    |                                                                                                                                                                                                                                                                                                                                                                                                                                                               | El documento de gestión operacional identifica los ensayos correctos de los gases fabricados en la propia instalación                                                                                                                | H                        |
|                                          | Contaminación de gases                                                                             | Gases contaminados por componentes que no se han limpiado hasta un nivel apropiado.<br>Quedó agente de limpieza en el componente.<br>Purgado posterior a la construcción que no cumple la especificación.<br>Contaminación proveniente de los concentradores de oxígeno.<br>Contaminación proveniente del compresor elevador de presión.<br>Contaminación proveniente del suministro de aire.<br>Mal funcionamiento de la purificación de aire en el sistema. | Procedimientos adecuados que alcanzan el nivel correcto de limpieza para garantizar la limpieza y el purgado apropiados                                                                                                              | M                        |
|                                          |                                                                                                    |                                                                                                                                                                                                                                                                                                                                                                                                                                                               | Identificación de los procedimientos de ensayo apropiados para demostrar que los sistemas acondicionadores funcionan correctamente                                                                                                   | M                        |
|                                          |                                                                                                    |                                                                                                                                                                                                                                                                                                                                                                                                                                                               | Puesta en servicio de la(s) unidad(es) concentradora(s) de oxígeno para garantizar que el grado de limpieza/purgado es correcto                                                                                                      | M                        |
|                                          |                                                                                                    |                                                                                                                                                                                                                                                                                                                                                                                                                                                               | El documento de gestión operacional identifica que los procedimientos de limpieza y los requisitos de ensayo son correctos                                                                                                           | M+H                      |
|                                          |                                                                                                    |                                                                                                                                                                                                                                                                                                                                                                                                                                                               | El documento de gestión operacional identifica que el mantenimiento de los compresores de gas/bombas de vacío es correcto                                                                                                            | M+H                      |
|                                          |                                                                                                    |                                                                                                                                                                                                                                                                                                                                                                                                                                                               | El documento de gestión operacional identifica que los procedimientos de ensayo y la frecuencia de los ensayos, incluidos los límites de los contaminantes posibles en el suministro de oxígeno, son correctos                       | M+H                      |
|                                          |                                                                                                    |                                                                                                                                                                                                                                                                                                                                                                                                                                                               | Procedimiento correcto para validar la limpieza de los componentes                                                                                                                                                                   | M                        |
|                                          |                                                                                                    |                                                                                                                                                                                                                                                                                                                                                                                                                                                               | Utilización de componentes que cumplen los requisitos de limpieza en esta parte de la Norma ISO 7396                                                                                                                                 | M                        |
|                                          |                                                                                                    |                                                                                                                                                                                                                                                                                                                                                                                                                                                               | Ubicación correcta de la entrada al(a) los compresor(es) de aire                                                                                                                                                                     | M+H                      |
|                                          |                                                                                                    |                                                                                                                                                                                                                                                                                                                                                                                                                                                               | Funcionamiento correcto de la unidad de purificación/lecho filtrante de aire                                                                                                                                                         | M+H                      |

| Objetivo de seguridad                    | Causa raíz                                                                                                                 | Situación peligrosa                                                                                                                                                                                                                                                                                               | Medidas de control del riesgo                                                                                                                                                                                                            | Organización responsable |
|------------------------------------------|----------------------------------------------------------------------------------------------------------------------------|-------------------------------------------------------------------------------------------------------------------------------------------------------------------------------------------------------------------------------------------------------------------------------------------------------------------|------------------------------------------------------------------------------------------------------------------------------------------------------------------------------------------------------------------------------------------|--------------------------|
| Calidad del gas suministrado al paciente | Cantidad excesiva de partículas provenientes de las unidades concentradoras de oxígeno                                     | Bloqueo de los filtros utilizados en los componentes del sistema que origina un caudal reducido.<br>Fallo de los componentes (reguladores, etc.).<br>Fugas de gas a través de los componentes o conexiones.<br>Funcionamiento incorrecto del lecho filtrante.<br>Partículas provenientes de los lechos filtrantes | Mantenimiento/monitorización adecuadas del filtro aguas abajo de los lechos filtrantes                                                                                                                                                   | H                        |
|                                          |                                                                                                                            |                                                                                                                                                                                                                                                                                                                   | Procedimiento y especificación adecuados para la limpieza de la canalización y de los componentes y para comprobar los filtros después de la puesta en servicio                                                                          | M+H                      |
|                                          |                                                                                                                            |                                                                                                                                                                                                                                                                                                                   | Identificación de los procedimientos de ensayo adecuados para demostrar que los filtros no están bloqueados (y que no existe una cantidad excesiva de partículas en el sistema)                                                          | M+H                      |
|                                          |                                                                                                                            |                                                                                                                                                                                                                                                                                                                   | Identificación en el documento de gestión operacional de los procedimientos correctos de limpieza y sustitución del filtro y de los requisitos de ensayo para los filtros del MGPS                                                       | H                        |
|                                          |                                                                                                                            |                                                                                                                                                                                                                                                                                                                   | Identificación en el documento de gestión operacional de los procedimientos correctos de limpieza y sustitución del filtro y de los requisitos de ensayo para los filtros de los productos sanitarios conectados al MGPS                 | H                        |
|                                          |                                                                                                                            |                                                                                                                                                                                                                                                                                                                   | Identificación en el documento de gestión operacional del mantenimiento correcto de los filtros.                                                                                                                                         | H                        |
|                                          | Ignición/descomposición de componentes utilizados en el sistema de producción de gas en la propia instalación              | Gases tóxicos liberados en la corriente de aire.<br>Riesgo de ignición de componentes no metálicos cuando se trabaja desde la fuente de suministro de botellas llenadas a partir del sistema de producción de gas en la propia instalación.                                                                       | Comprobación de que los componentes utilizados cumplen la Norma ISO 15001                                                                                                                                                                | M                        |
|                                          |                                                                                                                            |                                                                                                                                                                                                                                                                                                                   | Se garantiza en el documento de gestión operacional que todos los repuestos de sustitución utilizados en el sistema de producción de gas en la propia instalación cumplen la Norma ISO 15001                                             | H                        |
|                                          |                                                                                                                            |                                                                                                                                                                                                                                                                                                                   | Especificación correcta del diseño de los componentes del compresor elevador de presión para garantizar que cuando se produzcan igniciones parciales no causarán que se administre ningún gas tóxico a los pacientes                     | M                        |
|                                          |                                                                                                                            |                                                                                                                                                                                                                                                                                                                   | Instalación correcta del compresor elevador de presión que garantiza que se controla y se monitoriza la temperatura del compresor elevador de presión, para que permanezca suficientemente baja e impida así que se produzcan igniciones | M                        |
|                                          | Contaminación del gas inyectado en el depósito de oxígeno 93 de alta presión proveniente del compresor elevador de presión | Aumento de la posibilidad de que se transfieran gases tóxicos                                                                                                                                                                                                                                                     | Se efectúan ensayos continuos del gas suministrado para mantener el abastecimiento del depósito de oxígeno 93 de alta presión, que garantice que el producto es de la calidad correcta especificada en la farmacopea                     | H                        |
|                                          |                                                                                                                            |                                                                                                                                                                                                                                                                                                                   | Identificación en el documento de gestión operacional de los contaminantes que conviene monitorizar para garantizar que el sistema funciona correctamente                                                                                | H                        |

| Objetivo de seguridad                    | Causa raíz                                                                                                                                      | Situación peligrosa                                                                                                        | Medidas de control del riesgo                                                                                                                                                                                                                                                                                                                                              | Organización responsable |
|------------------------------------------|-------------------------------------------------------------------------------------------------------------------------------------------------|----------------------------------------------------------------------------------------------------------------------------|----------------------------------------------------------------------------------------------------------------------------------------------------------------------------------------------------------------------------------------------------------------------------------------------------------------------------------------------------------------------------|--------------------------|
| Calidad del gas suministrado al paciente | Variabilidad de la calidad del producto de oxígeno que se suministra al sistema de canalización                                                 | Falta de análisis de tendencias del funcionamiento de la planta respecto a la calidad y seguridad del producto             | Identificación en el documento de gestión del riesgo de los requisitos para documentar los parámetros esenciales/críticos que demuestran el funcionamiento correcto de la planta                                                                                                                                                                                           | H                        |
|                                          |                                                                                                                                                 |                                                                                                                            | Se efectúa periódicamente la revisión por la dirección de los datos de la planta para garantizar la conformidad de la misma y que la calidad del producto se mantiene sin desviaciones                                                                                                                                                                                     | H                        |
|                                          |                                                                                                                                                 |                                                                                                                            | Monitorización del funcionamiento de los lechos filtrantes utilizando análisis de tendencias para garantizar que el material de los lechos se cambia antes de que el producto se desvíe de su especificación                                                                                                                                                               | H                        |
|                                          |                                                                                                                                                 |                                                                                                                            | Identificación en el documento de gestión del riesgo del control de las no conformidades de la planta                                                                                                                                                                                                                                                                      | H                        |
|                                          | Depósito de oxígeno de alta presión llenado desde el compresor elevador de presión utilizado dentro de los confines de la instalación sanitaria | Falta de trazabilidad del producto.<br>Necesidad de efectuar una retirada de producto del sistema de forma segura y eficaz | Sistema de gestión del lote establecido, para registrar los datos esenciales y etiquetar las botellas con la información del lote apropiado                                                                                                                                                                                                                                | H                        |
|                                          |                                                                                                                                                 |                                                                                                                            | Sistema de gestión de la calidad que cumple los requisitos de las normas de correcta fabricación y los requisitos reglamentarios farmacéuticos para el llenado y la trazabilidad de los productos                                                                                                                                                                          | H                        |
|                                          |                                                                                                                                                 |                                                                                                                            | Procedimientos documentados que cubren el llenado de los depósitos de alta presión                                                                                                                                                                                                                                                                                         | H                        |
|                                          |                                                                                                                                                 |                                                                                                                            | Capacitación de los operadores para el llenado de los depósitos de alta presión                                                                                                                                                                                                                                                                                            | H                        |
|                                          |                                                                                                                                                 |                                                                                                                            | Evaluación de la competencia de los operadores para garantizar la conformidad con los procedimientos                                                                                                                                                                                                                                                                       | H                        |
|                                          | Se emprende una acción inapropiada cuando se produce una condición de emergencia en el sistema de producción de gas en la propia instalación    | Calidad defectuosa del gas suministrado al MGPS.<br>Fallo del abastecimiento al MGPS                                       | Definición de los procedimientos adecuados para el funcionamiento del sistema de producción de gas en la propia instalación en una condición de emergencia                                                                                                                                                                                                                 | M+H                      |
|                                          |                                                                                                                                                 |                                                                                                                            | Definición de los requisitos de capacitación de emergencia para todo el personal asociado y todos los usuarios del sistema de producción de gas en la propia instalación                                                                                                                                                                                                   | H                        |
|                                          |                                                                                                                                                 |                                                                                                                            | Proporcionar capacitación de emergencia para todo el personal asociado y todos los usuarios del sistema de producción de gas en la propia instalación                                                                                                                                                                                                                      | H                        |
|                                          |                                                                                                                                                 |                                                                                                                            | Especificación en el documento de gestión operacional de la necesidad de evaluar la competencia de todo el personal asociado/usuarios para la utilización de emergencia del sistema de producción de gas en la propia instalación y para especificar los requisitos del contenido del programa de reciclaje; Inclusión en el documento de los registros de la capacitación | H                        |



| Objetivo de seguridad                                                                                                                                                                                                                                                    | Causa raíz                                                                                                 | Situación peligrosa                                                                          | Medidas de control del riesgo                                                                                                                                                                                                                                                                                                           | Organización responsable                                                                                                                                                                                           |
|--------------------------------------------------------------------------------------------------------------------------------------------------------------------------------------------------------------------------------------------------------------------------|------------------------------------------------------------------------------------------------------------|----------------------------------------------------------------------------------------------|-----------------------------------------------------------------------------------------------------------------------------------------------------------------------------------------------------------------------------------------------------------------------------------------------------------------------------------------|--------------------------------------------------------------------------------------------------------------------------------------------------------------------------------------------------------------------|
| Funcionamiento del sistema                                                                                                                                                                                                                                               | Utilización o mantenimiento incorrecto del sistema de producción de gas en la propia instalación           | Fallo del abastecimiento de gas al MGPS.<br>Calidad defectuosa del gas suministrado al MGPS  | Definición en el documento de gestión operacional del sistema de mantenimiento preventivo correcto para garantizar la fiabilidad de la planta                                                                                                                                                                                           | H                                                                                                                                                                                                                  |
|                                                                                                                                                                                                                                                                          |                                                                                                            |                                                                                              | Definición las responsabilidades para todo el personal asociado y todos los usuarios del sistema de producción de gas en la propia instalación                                                                                                                                                                                          | H                                                                                                                                                                                                                  |
|                                                                                                                                                                                                                                                                          |                                                                                                            |                                                                                              | Definición de los requisitos de capacitación para todo el personal asociado y todos los usuarios del sistema de producción de gas en la propia instalación                                                                                                                                                                              | H                                                                                                                                                                                                                  |
|                                                                                                                                                                                                                                                                          |                                                                                                            |                                                                                              | Garantía de que todas las válvulas de corte de zona, paneles de control y paneles de alarma están situados en una ubicación apropiada y están correctamente etiquetados                                                                                                                                                                 | H                                                                                                                                                                                                                  |
|                                                                                                                                                                                                                                                                          |                                                                                                            |                                                                                              | La capacitación impartida se extiende a todo el personal asociado y todos los usuarios del sistema de producción de gas en la propia instalación                                                                                                                                                                                        | H                                                                                                                                                                                                                  |
|                                                                                                                                                                                                                                                                          |                                                                                                            |                                                                                              | Especificación en el documento de gestión operacional de la necesidad de evaluar la competencia de todo el personal asociado/usuarios del sistema de producción de gas en la propia instalación, y de especificar los requisitos del contenido del programa de reciclaje; Inclusión en el documento de los registros de la capacitación | H                                                                                                                                                                                                                  |
|                                                                                                                                                                                                                                                                          | Recursos insuficientes para utilizar y gestionar el sistema de producción de gas en la propia instalación. | Calidad defectuosa del gas suministrado al MGPS.<br>Fallo del abastecimiento de gas al MGPS. | Revisión de los requisitos de dotación de personal para el funcionamiento seguro del sistema de producción de gas en la propia instalación (personal en horario normal de trabajo y fuera del horario normal de trabajo)                                                                                                                | H                                                                                                                                                                                                                  |
|                                                                                                                                                                                                                                                                          |                                                                                                            |                                                                                              | Especificación en el documento de gestión operacional de la necesidad de revisar con regularidad los requisitos de dotación de personal                                                                                                                                                                                                 | H                                                                                                                                                                                                                  |
|                                                                                                                                                                                                                                                                          |                                                                                                            |                                                                                              | Disponibilidad de servicios de mantenimiento externos para dotar a la planta de mantenimiento tanto preventivo como correctivo                                                                                                                                                                                                          | H                                                                                                                                                                                                                  |
|                                                                                                                                                                                                                                                                          | Control de la concentración de oxígeno                                                                     | Utilización de dos fuentes de suministro de concentración diferente (93% frente a 99,5%).    | Equipo calibrado utilizando el gas suministrado al MGPS en vez del gas normalizado.                                                                                                                                                                                                                                                     | Definición en el documento de gestión operacional de la utilización de una botella certificada como fuente del gas normalizado para calibrar el analizador en el producto sanitario que administra gas al paciente |
| Los productos sanitarios no compatibles con la utilización de oxígeno 93 se deberían etiquetar para que indiquen el cuidado específico necesario que permita la utilización del producto de una forma segura                                                             |                                                                                                            |                                                                                              |                                                                                                                                                                                                                                                                                                                                         | H                                                                                                                                                                                                                  |
| En las zonas de alto riesgo dentro de la instalación sanitaria (tales como la UCI, quirófano) debería existir un visualizador permanente de la concentración de oxígeno con alarmas de los límites específicos                                                           |                                                                                                            |                                                                                              |                                                                                                                                                                                                                                                                                                                                         | H                                                                                                                                                                                                                  |
| Indicación de la calidad potencial del gas que se está administrando especificada en el etiquetado de los puntos de salida de gas                                                                                                                                        |                                                                                                            |                                                                                              |                                                                                                                                                                                                                                                                                                                                         | H                                                                                                                                                                                                                  |
| Especificación en el documento de gestión operacional de la necesidad de evaluar la competencia de todo el personal asociado/usuarios del sistema de producción de gas en la propia instalación, y de especificar los requisitos del contenido del programa de reciclaje |                                                                                                            |                                                                                              |                                                                                                                                                                                                                                                                                                                                         | H                                                                                                                                                                                                                  |

| Objetivo de seguridad                  | Causa raíz                                                                                               | Situación peligrosa                                                                                                                                                        | Medidas de control del riesgo                                                                                                                                                                                                                                                                                                                                                                                           | Organización responsable |
|----------------------------------------|----------------------------------------------------------------------------------------------------------|----------------------------------------------------------------------------------------------------------------------------------------------------------------------------|-------------------------------------------------------------------------------------------------------------------------------------------------------------------------------------------------------------------------------------------------------------------------------------------------------------------------------------------------------------------------------------------------------------------------|--------------------------|
| Control de la concentración de oxígeno | Utilización de dos fuentes de suministro de concentración diferente (oxígeno 93% frente a oxígeno 99,5%) | Los sensores de flujo utilizados en los productos sanitarios pueden no ser adecuados para utilización donde existe una concentración relativamente alta de argón en el gas | Los productos sanitarios no compatibles con la utilización de oxígeno 93 se deberían etiquetar para que indiquen el cuidado específico necesario que permita la utilización del producto de una forma segura                                                                                                                                                                                                            | H                        |
|                                        | Utilización de oxígeno 93%                                                                               | Altos niveles de argón en el gas a administrar al paciente a presiones más altas                                                                                           | Impedir la utilización de oxígeno 93 en cámaras hiperbáricas                                                                                                                                                                                                                                                                                                                                                            | H                        |
|                                        |                                                                                                          |                                                                                                                                                                            | Para la anestesia con caudal bajo de gas fresco, se debe tener en cuenta el posible aumento de la concentración de argón permitida para oxígeno 93. Se deben definir procedimientos apropiados para mantener la concentración de argón a un nivel aceptable                                                                                                                                                             | H                        |
|                                        | Utilización de dos fuentes de suministro de concentración diferente (oxígeno 93% frente a oxígeno)       | Dependiendo de la condición del paciente, la concentración del oxígeno podría ejercer un efecto adverso sobre el tratamiento del paciente                                  | Se deben etiquetar las unidades terminales y el equipo                                                                                                                                                                                                                                                                                                                                                                  | H                        |
|                                        |                                                                                                          |                                                                                                                                                                            | La instalación sanitaria debe garantizar que el equipo médico utilizado es compatible con oxígeno 93                                                                                                                                                                                                                                                                                                                    | H                        |
|                                        |                                                                                                          |                                                                                                                                                                            | Sistemas que administran un caudal bajo de oxígeno (la utilización de oxígeno 93 puede producir hipoxemia debido a la acumulación de argón en el sistema circular)                                                                                                                                                                                                                                                      | H                        |
|                                        | Mala gestión del sistema de producción de gas en la propia instalación                                   | Gran variabilidad en la concentración de oxígeno en el gas generado por el sistema de producción de gas en la propia instalación                                           | Definición clara en el documento de gestión operacional proporcionado por el fabricante del sistema de producción de gas en la propia instalación, que identifique las instrucciones de uso y de mantenimiento para que la planta funcione correctamente. El manual del usuario debería especificar el nivel requerido de capacitación para garantizar la seguridad del paciente                                        | H                        |
|                                        |                                                                                                          |                                                                                                                                                                            | Especificación en el documento de gestión operacional de los requisitos para utilizar el sistema de producción de gas en las dependencias de la instalación sanitaria, incluyendo los requisitos para documentar las condiciones operacionales y las necesidades de capacitación y contenido del programa de reciclaje, y las frecuencias del mantenimiento aprobadas para los componentes esenciales de la instalación | H                        |

## **Anexo G (Informativo)**

### **Gestión operacional**

#### **G.1 Introducción**

Las recomendaciones dadas en este anexo representan la mejor práctica de gestión operacional para la utilización del MGPS (sistema de canalización de gases medicinales) y se deberían seguir, especialmente cuando repercutan sobre la seguridad del paciente o del personal y cuando se han efectuado modificaciones o mejoras de las instalaciones existentes.

El objetivo principal de este anexo es proporcionar recomendaciones para la asignación de responsabilidades que aseguren la provisión de un MGPS seguro y fiable y su funcionamiento y utilización eficaces, para mantener la seguridad del paciente garantizando la continuidad del suministro. Este objetivo se alcanzará solamente si los usuarios médicos y de enfermería y el personal de la instalación sanitaria participan en la introducción de una política operacional diseñada para minimizar los riesgos resultantes de la utilización incorrecta del sistema.

Este anexo contempla los aspectos de la gestión operacional incluyendo los requisitos estatutarios, las responsabilidades funcionales, los procedimientos operacionales, la capacitación y las comunicaciones, la gestión de las botellas y de otras fuentes de suministro, el mantenimiento y reparación preventivos y la determinación de los riesgos.

Está previsto que lo utilicen los gestores operacionales, los ingenieros, los controladores de la calidad, los técnicos, los oficiales financieros y otros profesionales que participan en la gestión diaria de un MGPS. Un objetivo de este anexo es clarificar los requisitos del sistema de gestión operacional al personal sanitario y a cualquier contratista interesado, antes de su uso inicial o después de cualquier modificación.

Las recomendaciones sobre la gestión operacional dadas en este anexo se deberían seguir para todas las instalaciones, incluyendo cualquier ampliación, modificación o mejora del MGPS.

Se debería evaluar el funcionamiento de las instalaciones existentes para verificar su conformidad con esta parte de la Norma ISO 7396, incluyendo este anexo. Se debería preparar un plan para la mejora de los sistemas existentes basado en la gestión del riesgo, que garantice que la seguridad del paciente se mantiene durante el proceso. Será necesario que los gestores se coordinen con sus colegas médicos y que tengan en cuenta otras recomendaciones publicadas para evaluar las deficiencias técnicas del sistema.

#### **G.2 Requisitos estatutarios**

**G.2.1** Es responsabilidad de los dueños y ocupantes de la instalación, de los gestores generales y de los directores garantizar que sus instalaciones y las actividades que se efectúan dentro de las mismas cumplen toda la reglamentación nacional y regional, que se debería enumerar en el documento de gestión operacional.

NOTA En Europa, los gases medicinales están cubiertos por las directivas pertinentes siguientes:

- Directiva 2001/83 CE de la UE (relativa a los medicamentos para uso humano).
- Directiva 93/42/CEE de productos sanitarios (sobre el diseño y construcción de los productos sanitarios).
- Directiva 2003/94 CE de la UE (que detalla los principios y directrices de las prácticas correctas de fabricación en relación con los medicamentos de uso humano y los medicamentos en investigación de uso humano).

**G.2.2** Los gases medicinales se clasifican como medicamentos en la reglamentación farmacéutica y están, por tanto, sujetos a los mismos procedimientos de aprovisionamiento y de calidad que todos los demás medicamentos. El controlador de la calidad (QC) es responsable del control de la calidad de todos los medicamentos y esto incluye a los gases medicinales y la fabricación de cualquier gas medicinal en la propia instalación.

### **G.3 Responsabilidades funcionales**

#### **G.3.1 Generalidades**

Este anexo identifica las distintas funciones que se necesitan ejercer y las responsabilidades que las acompañan. Los títulos dados aquí son genéricos. Describen el papel del individuo relacionado con el MGPS, pero no están previstos como descripciones legales del puesto de trabajo a efectos laborales. En efecto, algunos miembros del personal referido podrían no ser personal residente sino personas empleadas por organismos externos y que trabajan bajo contrato.

A continuación se indica el personal clave que tienen responsabilidades específicas dentro de la política operacional:

- a) director ejecutivo (EM, *executive manager*);
- b) director técnico de la instalación (FEM, *facilities engineering manager*);
- c) persona autorizada (AP, *authorized person*);
- d) persona competente (CP, *competent person*);
- e) controlador de la calidad (QC, *quality controller*);
- f) oficial médico designado (DMO, *designated medical officer*);
- g) oficial enfermero designado (DNO, *designated nursing officer*);
- h) persona designada (DP, *designated person*).

Algunos miembros del personal pueden tener otras responsabilidades no conectadas con el MGPS y en algunos casos el mismo individuo puede desempeñar una o más de una función.

En todos los casos, sin embargo, es esencial identificar a una AP que sea responsable de la gestión día a día del MGPS y para supervisar que el MGPS se hace funcionar de forma segura y eficaz y que pueda decidir si un MGPS se debería poner en servicio o retirar del mismo.

El EM, FEM y AP pueden ser responsables de más de un MGPS en más de una instalación.

Para evitar la confusión con otras personas autorizadas, el personal clave mencionado en este anexo están siempre comprometidos con el MGPS.

#### **G.3.2 Director ejecutivo (EM)**

**G.3.2.1** El EM es la persona con la responsabilidad gestora ulterior de la organización en la que se instala y hace funcionar el MGPS, incluyendo la asignación de recursos y el nombramiento del personal.

**G.3.2.2** La responsabilidad formal del MGPS reside en el EM, aunque la AP retiene la responsabilidad efectiva de la gestión día a día del MGPS.

**G.3.2.3** El EM es responsable de la implementación de la política operacional para el MGPS y de garantizar que el documento de gestión operacional define claramente las funciones y responsabilidades de todo el personal al que puede atañer la utilización, instalación, modificación y mantenimiento del MGPS. El EM es responsable también de monitorizar la implementación del documento de gestión operacional.

**G.3.2.4** El EM podría delegar las responsabilidades específicas del MGPS en personal clave. El alcance de la delegación se debería establecer claramente en el documento de gestión operacional, junto con las disposiciones para la coordinación de la monitorización y la revisión.

### **G.3.3 Director técnico de la instalación (FEM)**

**G.3.3.1** El FEM es la persona con responsabilidad en conjunto del MGPS y que necesita tener un conocimiento técnico y experiencia suficientes para entender completamente los peligros que puedan surgir durante la puesta en servicio, la construcción, la utilización, el mantenimiento, la modificación y las mejoras del MGPS. El FEM normalmente rinde cuentas al EM de la instalación sanitaria.

**G.3.3.2** El FEM de la instalación sanitaria es responsable de la integridad del MGPS. El FEM podría tener una o más personas autorizadas (AP) que le rinden cuentas, con la responsabilidad jerárquica claramente definida para la gestión del MGPS.

**G.3.3.3** El FEM es responsable de implementar y monitorizar el documento de gestión operacional que cubre el MGPS.

**G.3.3.4** El FEM es responsable de garantizar que todas las AP y CP empleadas o contratadas por el departamento técnico son competentes y están cualificadas.

**G.3.3.5** El FEM es responsable de mantener un registro de las AP y CP empleadas contratadas en la instalación.

**G.3.3.6** El FEM es responsable de emprender las acciones correctivas apropiadas en caso de fallo notificado o desgaste excesivo del equipo y componentes del MGPS.

### **G.3.4 Persona autorizada (AP)**

**G.3.4.1** La AP debería ser designada por escrito por el EM y tener un conocimiento técnico, capacitación y experiencia suficientes para entender completamente los peligros que conlleva la utilización del MGPS. La AP debería ser designada por escrito por el director ejecutivo o director general siguiendo la recomendación de un ingeniero diplomado con conocimiento de especialista de los MGPS.

**G.3.4.2** La AP nombrada es responsable de la gestión día a día del (de los) MGPS o sección del MGPS designados. Para un MGPS concreto, puede haber una o más AP, con responsabilidad jerárquica claramente definida.

El documento de gestión operacional debería definir el número de AP requeridas para gestionar el MGPS y la necesidad de que una AP esté siempre disponible en la instalación o por teléfono.

**G.3.4.3** Todas las AP nombradas deberían estar reseñadas en el documento de gestión operacional y dadas a conocer a todas las partes interesadas de la instalación. La AP debería tener un conocimiento específico del MGPS de la instalación y ser independiente del contratista que realiza el trabajo en el MGPS.

**G.3.4.4** La AP es responsable de lo siguiente:

- a) la emisión de autorizaciones y la gestión y utilización de los procedimientos de autorización del trabajo relacionados con el MGPS;
- b) garantizar que todos los DNO en departamentos que es probable sean parte interesada estén informados de la duración estimada del trabajo y de la interrupción del MGPS;
- c) garantizar que todas las unidades terminales identificadas como defectuosas o que requieran atención estén etiquetadas de forma apropiada.

**G.3.4.5** La AP debería tener la responsabilidad de decidir si un MGPS se debería poner en servicio o retirar del mismo.

**G.3.4.6** La AP es responsable de evaluar la competencia de todas las CP y DP empleadas directamente por el departamento técnico.

**G.3.4.7** La AP es responsable de garantizar que el trabajo lo efectúa solamente personal capacitado o contratistas especializados aprobados, que estén en posesión de una certificación respecto a un sistema de gestión de la calidad según se especifica en el apartado 11.1. El campo de aplicación de la certificación se debería definir como el diseño, la instalación, la puesta en servicio o el mantenimiento del MGPS, según proceda. Se debería demostrar la evidencia de la documentación de certificación vigente.

**G.3.4.8** La AP es responsable de coordinar los diferentes manuales de instrucciones para cada sección individual del MGPS para preparar un manual de instrucciones que cubra el sistema completo.

**G.3.4.9** Se debería consultar a la AP antes de la compra de cualquier equipo médico que se conectará al MGPS para garantizar que las especificaciones del diseño del MGPS se pueden todavía cumplir con la utilización del equipo nuevo.

### **G.3.5 Persona competente (CP)**

**G.3.5.1** La CP debería tener un conocimiento técnico, capacitación y experiencia suficientes para cumplir sus obligaciones de una forma competente y entender completamente los peligros que conlleva la utilización del MGPS. La CP debería estar mencionada en el registro de las personas competentes que mantiene el FEM.

**G.3.5.2** La CP es normalmente la persona o instalador de mantenimiento que realiza cualquier trabajo en el MGPS. Una lista de sus responsabilidades y obligaciones se describe en el apartado G.5.4, "Procedimiento de la autorización del trabajo".

**G.3.5.3** La CP podría ser un miembro del personal de un contratista especialista o podría ser un miembro del departamento técnico de la instalación sanitaria. Cuando la CP es un miembro del departamento técnico, la AP es responsable de evaluar la competencia de la CP con respecto al trabajo en el MGPS. Cuando la CP es un miembro del personal de un contratista, el contratista es responsable de evaluar su competencia y de mantener un registro de las CP empleadas en su organización.

### **G.3.6 Controlador de la calidad (QC)**

**G.3.6.1** El QC debería ser designado por escrito por el EM y debería ser responsable de la calidad de los gases medicinales distribuidos por el MGPS. El QC podría ser un farmacéutico y debería ser una persona adecuadamente cualificada y tener conocimiento de especialista, capacitación y experiencia con el MGPS.

Cuando las obligaciones del QC incluyan efectuar los ensayos de la calidad específicos de los gases medicinales distribuidos por el MGPS, los ensayos deberían cumplir los procedimientos documentados para garantizar que cumplen las especificaciones pertinentes.

**G.3.6.2** La persona designada como el QC (por ejemplo un farmacéutico) es responsable del control de la calidad de los gases medicinales distribuidos por el MGPS en todas las unidades terminales y administrados a los pacientes para garantizar que cumplen las especificaciones pertinentes de la farmacopea. Será necesario que la AP se coordine con el QC antes de que un MGPS se pueda poner en servicio por primera vez o después de cualquier mantenimiento o modificación del MGPS, para garantizar que el gas medicinal es de la calidad correcta.

**G.3.6.3** El QC debería haber recibido la capacitación adecuada para permitir la verificación de la calidad del gas medicinal distribuido por el MGPS antes de la puesta en servicio del mismo. Debería también estar familiarizado con los requisitos de este anexo.

**G.3.6.4** El QC debería también ser responsable de garantizar que el MGPS puede suministrar de forma continua el gas medicinal de la calidad correcta a todos los pacientes. Esto se aplica especialmente al aire para uso médico suministrado por los sistemas compresores o por los sistemas mezcladores y al oxígeno 93 producido por los sistemas concentradores de oxígeno, cuando los gases se fabrican en la propia instalación. Puede ser apropiado incluir un sistema de advertencia de la calidad del producto medicinal dentro del departamento de farmacia. Puede existir reglamentación regional o nacional aplicable a tales gases generados en la instalación.

### **G.3.7 Oficial médico designado (DMO)**

**G.3.7.1** El DMO debería actuar como el punto focal para todas las comunicaciones entre el departamento técnico y el departamento clínico específico relacionado con el MGPS. El DMO se debería definir en el documento de gestión operacional.

**G.3.7.2** El DMO debería asesorar al departamento técnico sobre cualquier requisito especial para su departamento relativo al MGPS, tal como la provisión de botellas de emergencia.

**G.3.7.3** El DMO es el médico a quien se debería consultar sobre las ampliaciones de la canalización y otras modificaciones del MGPS. El DMO debería ser responsable de informar a la AP de cualquier cambio significativo en la utilización de los gases medicinales o la introducción de procedimientos clínicos nuevos que puedan afectar a la demanda de gas medicinal.

### **G.3.8 Oficial de enfermería designado (DNO)**

**G.3.8.1** El DNO debería actuar como el punto focal para todas las comunicaciones relacionadas con el MGPS entre el departamento técnico y su propio departamento o departamentos especificados. Idealmente habría un DNO en cada departamento y éstos se deberían definir en el documento de gestión operacional.

**G.3.8.2** El DNO es la persona apropiada en cada departamento con quien la AP se coordina sobre cualquier asunto que afecte al MGPS y quien debería ser responsable de autorizar una interrupción planificada del suministro.

**G.3.8.3** Cuando el DNO autoriza cualquier interrupción del MGPS en un departamento o departamentos especificados, debería firmar el parte apropiado de la "Autorización del trabajo". El documento de gestión operacional debería disponer claramente los requisitos para tal autorización.

La AP debería describir al DNO el alcance de la restricción o interrupción que sufrirá el MGPS mientras se desarrolla el trabajo y debería indicar el nivel de peligro que implica. El DNO debería ayudar, según sea necesario, a garantizar que el servicio se mantiene mientras el MGPS está interrumpido.

**G.3.8.4** El DNO es responsable de garantizar que el personal pertinente en el departamento es consciente de la interrupción del MGPS y cuáles unidades terminales no se pueden utilizar.

**G.3.8.5** El documento de gestión operacional debería enumerar los DNO para cada departamento y cualquier disposición para la cobertura durante la ausencia de los mismos.

**G.3.8.6** El DNO debería emprender la acción apropiada en el caso de una emergencia según se especifique en el documento de gestión operacional.

**G.3.8.7** Todos los DNO deberían estar capacitados en la utilización del MGPS que sea pertinente para sus departamentos y deberían conocer la acción a emprender en el caso de una emergencia.

El documento de gestión operacional debería establecer estos requisitos de capacitación.

### **G.3.9 Persona designada (DP)**

**G.3.9.1** La DP debería ser una persona con la capacitación adecuada. A la DP se le debería asignar la responsabilidad de efectuar las operaciones particulares en el MGPS (por ejemplo, cambiar las botellas en el conector de distribución del MGPS, ensayar los sistemas de alarma, etc.).

## **G.4 Documento de gestión operacional**

**G.4.1** Los requisitos de gestión operacional para hacer funcionar el MGPS se deberían detallar en un documento de gestión operacional.

Este anexo se puede utilizar para desarrollar un documento de gestión operacional .

**G.4.2** El documento de gestión operacional debería incluir los procedimientos documentados para lo siguiente:

- a) el control de los documentos y registros;
- b) la capacitación y la comunicación;
- c) la gestión de las emergencias;
- d) la gestión de los cambios;
- e) las autorizaciones del trabajo;
- f) el mantenimiento preventivo;
- g) las reparaciones;
- h) la gestión de las fuentes de suministro;
- i) el almacenamiento y manipulación de botellas;
- j) la compra de equipos médicos;
- k) la gestión de los contratistas.

NOTA A veces se preparan políticas o procedimientos separados para complementar al documento de gestión operacional.

**G.4.3** El EM es responsable del documento de gestión operacional en conjunto y de su implementación.

**G.4.4** El documento de gestión operacional debería indicar los procedimientos a seguir y el personal a quien se necesita consultar antes de conectar un producto o equipo médico nuevo al MGPS. Se debería prestar una atención especial a los cambios del sistema de suministro.

Es especialmente importante revisar los puntos de ajuste de los sistemas de alarma antes de utilizar el sistema.

**G.4.5** En algunas zonas de la instalación, el equipo de gases medicinales se puede instalar dentro de recintos o detrás de paneles decorativos para proporcionar un ambiente más hogareño. En algunos casos, es esencial mantener la identificación de forma que el personal sea consciente de que el equipo está disponible para utilización en el paciente.



Cuando se utilizan mezcladores de gases, se deberían seguir las instrucciones del fabricante respecto al funcionamiento y al mantenimiento para impedir el reflujo de un gas en la otra canalización en el caso de un funcionamiento defectuoso del equipo.

NOTA Algunos tipos antiguos de equipos de mezcla pueden permitir el reflujo de gas de una canalización a otra, lo que puede originar un enriquecimiento en oxígeno de los sistemas de aire para uso médico, o la reducción de la concentración de oxígeno en las canalizaciones de oxígeno.

## **G.5 Procedimientos operacionales**

### **G.5.1 Procedimiento para el control de los documentos y registros**

**G.5.1.1** El sistema de gestión de la calidad debería controlar los documentos de gestión operacional para garantizar que las versiones pertinentes y más actualizadas de los documentos aplicables están disponibles en el punto de uso.

El procedimiento debería definir los controles necesarios para

- revisar y aprobar los documentos;
- garantizar que en los puntos de uso están disponibles solamente las versiones actuales de los documentos aplicables;
- impedir el uso no previsto de documentos obsoletos.

**G.5.1.2** Se deberían retener todos los registros de los resultados de las actividades efectuadas de acuerdo con los procedimientos en el documento de gestión operacional.

NOTA Los apartados 4.2.3 y 4.2.4 de la Norma ISO 13485:2003<sup>[20]</sup> dan recomendaciones para el control de los documentos y registros.

**G.5.1.3** El EM es responsable de la monitorización del documento de gestión operacional para garantizar que se está implementando de forma apropiada. Esto se debería efectuar a intervalos regulares, y el procedimiento para tal monitorización se debería disponer en el documento de gestión operacional.

**G.5.1.4** La responsabilidad de la monitorización de los aspectos específicos se debería delegar en el personal clave apropiado. Los detalles de tal delegación se deberían disponer en el documento de gestión operacional.

### **G.5.2 Capacitación y procedimiento de comunicación**

**G.5.2.1** Todo el personal que participa en la administración y uso de los gases medicinales en la instalación sanitaria debería tener un conocimiento general sólido de los principios operacionales, del diseño básico y de las funciones del MGPS. Deberían estar capacitados sobre aquellos sistemas específicos de los que serán responsables.

**G.5.2.2** Se debería establecer un programa de capacitación para todo el personal responsable del funcionamiento y uso del MGPS. Esto debería incluir a cualquier personal de enfermería. Se debería registrar y revisar regularmente toda la capacitación impartida.

**G.5.2.3** Todas las AP, DP y CP deberían haber completado satisfactoriamente un curso de capacitación apropiado antes de su nombramiento.

**G.5.2.4** Todas las AP, DP y CP deberían tener experiencia suficiente, estar familiarizadas con sus instalaciones particulares y su competencia se debería evaluar antes de su nombramiento.

**G.5.2.5** Se recomienda la reevaluación de la capacitación de todas las AP a intervalos establecidos y la asistencia a un curso de actualización o a otro curso de capacitación antes de la reevaluación. La recomendación para el nombramiento o renombramiento como una AP la debería hacer un FEM que tenga conocimiento de especialista del MGPS.

**G.5.2.6** El QC debería poseer capacitación específica que cubra las responsabilidades y obligaciones que se requerirá que asuma respecto al MGPS. Puede ser apropiado que el QC asista a parte o a todos los cursos de capacitación para las AP.

**G.5.2.7** El personal médico y de enfermería que utilizan el MGPS deberían estar capacitados sobre el uso del sistema. Esta formación debería incluir el uso práctico del sistema y los procedimientos de emergencia y seguridad. El EM debería garantizar que todo el personal haya recibido esta capacitación antes de la utilización del MGPS y que se hayan impartido los cursos de actualización.

**G.5.2.8** El documento de gestión operacional debería establecer los medios de comunicación entre los diversos miembros clave del personal. Debería definir cuáles departamentos necesitan estar informados del trabajo que se está efectuando en el MGPS, el personal a notificar y si tal información se debería dar verbalmente o por escrito.

**G.5.2.9** Las acciones a emprender en el caso de un fallo del MGPS se deberían especificar en el documento de gestión operacional. Debería existir un medio claro de notificar cualquier fallo al FEM.

**G.5.2.10** Todo el personal a quien atañe el uso, instalación o mantenimiento del MGPS debería ser consciente del documento de gestión operacional y conocer sus responsabilidades específicas dentro del mismo.

**G.5.2.11** El documento de gestión operacional debería especificar la necesidad de garantizar que

- todos los usuarios son conscientes de la capacidad y de cualquier limitación del MGPS,
- el personal de enfermería y médico son conscientes del propósito de los sistemas de alarma y la acción a emprender en el caso de que se active una alarma.

**G.5.2.12** El personal responsable del funcionamiento del MGPS debería ser consciente de

- las actividades necesarias para garantizar el funcionamiento seguro continuado del sistema,
- las acciones a emprender en una condición de primer fallo o en una situación de emergencia cuando el MGPS sufre un fallo que impide el suministro de gases a las unidades terminales.

NOTA Los objetivos de seguridad y las situaciones peligrosas se dan en el anexo F.

### **G.5.3 Procedimiento de emergencia**

**G.5.3.1** El documento de gestión operacional debería establecer los procedimientos a seguir en el caso de una emergencia. Estos deberían incluir:

- a) la notificación de todos los incidentes;
- b) la(s) acción(es) a emprender, tales como cerrar las válvulas de corte de zona, utilizar las botellas de emergencia portátiles, etc.;
- c) la coordinación con otros miembros del personal y departamentos;
- d) convocar a los contratistas.

**G.5.3.2** Se debería cumplir toda la reglamentación nacional o local relacionada con las precauciones contra incendios.

**G.5.3.3** Se debería seguir el procedimiento de emergencia dispuesto en el documento de gestión operacional.

**G.5.3.4** Cuando un incidente es probable que cause una interrupción del suministro o afecte a la seguridad del paciente y del personal, el contratista responsable de hacer frente a la emergencia que afecta al MGPS debería especificar ya sea un tiempo máximo, desde la recepción de la llamada inicial hasta la llegada del contratista a la instalación, o la necesidad de proporcionar la información adecuada para emprender una acción inmediata.

**G.5.3.5** El documento de gestión operacional debería incluir los procedimientos de comunicación para garantizar que cualquier emergencia que afecte al MGPS se comunica inmediatamente a todas las zonas clínicas que es probable resulten afectadas y a todo el personal al que atañe el mantenimiento de los suministros de gas y de las acciones correctivas.

**G.5.3.6** Tales procedimientos de comunicación deberían incluir:

- la naturaleza de la emergencia;
- los detalles de los procedimientos de conservación del gas a aplicar;
- la duración probable de la emergencia;
- las acciones correctivas a emprender;
- la necesidad de registrar los detalles de cualquier incidente de emergencia y las comunicaciones relacionadas.

**G.5.3.7** Se deberían designar personas con experiencia en cada zona para coordinar y comunicar las acciones.

**G.5.3.8** Se debería cumplir la reglamentación regional o nacional relacionada con las comunicaciones externas de incidentes.

**G.5.3.9** El DNO debería estar adecuadamente capacitado en los procedimientos de emergencia requeridos para controlar los gases medicinales y el MGPS. Debería estar totalmente familiarizado con la ubicación de todas las válvulas de corte de zona en el (los) departamento(s) específico(s).

**G.5.3.10** Los procedimientos de emergencia se deberían iniciar al menos dos veces al año como un ejercicio, y se debería notificar y hacer seguimiento de cualquier problema o necesidad de reciclaje.

**G.5.3.11** Cuando se restablece el suministro de energía eléctrica normal después de un fallo del suministro de energía eléctrica, el personal responsable debería garantizar que todas las fuentes de suministro están en condiciones adecuadas de uso.

**G.5.3.12** El departamento técnico debería tener dibujos esquemáticos exactos y actualizados del MGPS mostrando las secciones principales y las ramas, los departamentos servidos, los reguladores de presión, las válvulas de aislamiento, las unidades terminales y los sistemas de alarma para cada servicio de gas medicinal. Estos dibujos esquemáticos deberían estar disponibles prontamente en la instalación y su ubicación debería ser conocida por todas las AP.

**G.5.3.13** El documento de gestión operacional debería especificar los requisitos para cerrar con llave las salas de válvulas y de la planta de gases medicinales para mantener las llaves en una ubicación segura. Los servicios de emergencia deberían estar informados de la ubicación de todas las llaves relacionadas con el MGPS.

**G.5.3.14** En el caso de una emergencia tal como un incendio o una fuga importante, una persona formada debería aislar la sección afectada cerrando las válvulas de aislamiento de emergencia o la válvula de corte de zona. Deberían notificar a la AP y al DNO apropiado inmediatamente.

**G.5.3.15** Tras recibir la notificación de una emergencia, el DNO en cada zona clínica debería controlar la utilización de gas del (de los) sistema(s) de canalización implicado(s) al nivel mínimo requerido, manteniendo a su vez la seguridad del paciente.

**G.5.3.16** El documento de gestión operacional debería describir los procedimientos necesarios para gestionar los inventarios de gas en el sistema de suministro para garantizar que existe gas disponible para uso en casos de emergencia.

**G.5.3.17** La AP debería comprobar y garantizar que el personal capacitado designado ponga en uso los suministros de emergencia cuando se requieran. Deberían existir disponibles suficientes botellas para usar en los conectores de distribución de emergencia o botellas almacenadas para uso en las emergencias, siguiendo los procedimientos apropiados especificados en el documento de gestión operacional.

**G.5.3.18** Si es necesario, se deberían pedir suministros adicionales de gas a los proveedores o a otras instalaciones sanitarias que cubran la duración esperada de la emergencia, siguiendo los procedimientos apropiados especificados en el documento de gestión operacional.

**G.3.5.19** Cualquier reparación o acciones de emergencia se deberían efectuar bajo el control de la AP y se deberían controlar mediante el uso de una autorización del trabajo.

**G.5.3.20** Se debería investigar inmediatamente la causa del fallo del suministro de emergencia y se deberían especificar las escalas de tiempo para las acciones correctivas y cuando proceda, se deberían iniciar inmediatamente las acciones correctivas para corregir el problema.

**G.5.3.21** Otras zonas de la instalación sanitaria no inicialmente afectadas podrían necesitar ser aisladas para efectuar reparaciones en las mismas. En estas circunstancias, se deberían instituir en estas zonas los procedimientos de comunicación y conservación antes del cierre del suministro de gas.

**G.5.3.22** Se deberían evaluar las situaciones de emergencia reales y se debería emprender la acción apropiada para mejorar los procedimientos y la capacitación para impedir una recurrencia.

#### **G.5.4 Procedimiento de la autorización del trabajo**

**G.5.4.1** El procedimiento de la autorización del trabajo se debería utilizar para controlar todo el trabajo planificado en el MGPS. Se utiliza para controlar la retirada segura del servicio del MGPS y la manera en la que se efectúa el trabajo (incluyendo las partes del sistema afectadas y el tiempo estimado para completarlo). Se debería garantizar que se siguen los procedimientos y los procesos correctos para restablecer el servicio del MGPS de forma que el suministro de gas cumpla la especificación de la calidad correcta para utilización en el paciente.

**G.5.4.2** El propósito de la autorización emitida bajo el procedimiento de la autorización del trabajo es

- salvaguardar la continuidad del suministro de gas a las unidades terminales;
- garantizar la seguridad del operador que trabaja en la vecindad del MGPS;
- garantizar el restablecimiento del servicio del MGPS en una condición segura, que incluye el examen de las porciones en las que no se prevé ninguna interrupción del servicio.

Cuando el trabajo no implica ninguna acción planificada que afecte el suministro de los gases medicinales (tal como la inspección de las unidades terminales), no se necesita utilizar la autorización del trabajo en el MGPS.

**G.5.4.3** El procedimiento de la autorización del trabajo se aplica a todo el mantenimiento preventivo, reparaciones, alteraciones o ampliaciones del MGPS existente, y a cualquier acción que pueda afectar al suministro del gas medicinal a las unidades terminales.

**G.5.4.4** La AP debería preparar la autorización del trabajo antes del comienzo del mismo. Utilizando la determinación del riesgo, la AP debería identificar, a partir de los dibujos esquemáticos del MGPS, el trabajo a efectuar, toda la documentación y dibujos esquemáticos necesarios y los medios de aislamiento.

**G.5.4.5** La autorización se debería entregar siempre a las CP pertinentes que han de trabajar en el MGPS antes de que comience ningún trabajo.

**G.5.4.6** No se debería aprobar que comience el trabajo en el MGPS sin la autorización del DMO o del DNO que permita a los oficiales designados disponer del tiempo adecuado para hacer los preparativos apropiados para suministrar los gases medicinales a los pacientes o al equipo, excepto en una emergencia.

**G.5.4.7** La autorización debería permanecer en vigor hasta que se completa el trabajo y el servicio del MGPS queda restablecido, de acuerdo con los procedimientos aprobados. La autorización debería permanecer en vigor durante el tiempo definido por la AP en la documentación o antes si así lo ha aprobado la CP con su firma.

**G.5.4.8** Si el objeto del trabajo cubierto por la autorización cambia, la autorización se debería cancelar y se debería emitir una nueva.

**G.5.4.9** Los procedimientos que especifican la obtención de una autorización del trabajo requieren la cooperación máxima de todo el personal y su aceptación de las responsabilidades que ello conlleva. La AP debería tomar la iniciativa de coordinar el trabajo y explicar totalmente el alcance y la duración de cualquier interrupción del servicio y garantizar que todos los contratistas y personal de enfermería siguen los procedimientos dispuestos en la autorización.

**G.5.4.10** El departamento técnico es responsable de la aplicación correcta del procedimiento de la autorización del trabajo. La AP debería ser responsable de la implementación del procedimiento de la autorización del trabajo pero podría delegar la responsabilidad de emitir las autorizaciones en una CP.

**G.5.4.11** La AP debería utilizar las técnicas de gestión del riesgo para definir los ensayos a efectuar antes de la puesta en servicio de nuevo del MGPS. Los ensayos se deberían detallar en la autorización y los resultados de los ensayos se deberían registrar y retener con la autorización del trabajo. La AP debería autorizar la entrega del MGPS para permitir su puesta en servicio de nuevo.

**G.5.4.12** La autorización debería definir los requisitos de ensayo específicos a verificar antes de restablecer el servicio del MGPS y quién debería atestiguar los ensayos presencialmente. El personal, los instrumentos de medición utilizados, los componentes sustituidos y los problemas que surjan durante las actividades se deberían registrar en la autorización.

**G.5.4.13** La autorización debería tener un número de referencia único y todo el personal pertinente debería firmarla y fecharla. La autorización del trabajo se debería retener en un registro durante al menos cinco años.

**G.5.4.14** El contratista debería mantener un registro de las CP aprobadas.

**G.5.4.15** La AP debería utilizar técnicas de gestión del riesgo para evaluar el nivel de peligro del trabajo a efectuar en el MGPS en el momento de preparar la autorización y registrar tal nivel en la misma.

**G.5.4.16** La AP es responsable de garantizar que los procedimientos a utilizar para aislar el MGPS y hacerlo seguro para trabajar en el mismo se detallan en la autorización. La CP es responsable de atestiguar presencialmente el aislamiento y de hacer que la planta o sistema sea seguro para trabajar en el mismo.

**G.5.4.17** Una vez que la CP haya aceptado una autorización, debería ser responsable de la realización segura del trabajo, dentro de los límites de la autorización. El trabajo estará sujeto a la supervisión por la AP. La CP debería estar totalmente familiarizada con los términos y requisitos de la autorización y debería dar instrucciones claras a cualquier persona que trabaje en el MGPS.

**G.5.4.18** Se debería corregir cualquier error identificado en las autorizaciones y el texto corregido se debería marcar con las iniciales de la CP.

**G.5.4.19** La CP debería firmar la autorización para certificar que el trabajo se ha terminado y solicitar que la AP examine y ensaye la instalación.

**G.5.4.20** La AP es responsable de garantizar que el trabajo se ha terminado satisfactoriamente y debería supervisar que los ensayos de la estanquidad de las válvulas, de las presiones, de las conexiones cruzadas, del caudal y presión de suministro, y del sistema de alarma, son conformes con las recomendaciones en la autorización.

**G.5.4.21** Tras haber terminado satisfactoriamente todos los ensayos, la AP debería supervisar la reconexión del sistema aislado al sistema principal y el purgado del MGPS con el gas específico.

**G.5.4.22** La AP debería informar al DMO o al DNO que el trabajo se ha terminado y que el MGPS está ahora disponible para su utilización.

**G.5.4.23** La AP debería retirar cualquier aviso de “no utilizar” u otros avisos de prohibición después de la terminación del trabajo y de la finalización de la autorización del trabajo. La AP debería retener la autorización original cuya vigencia ha finalizado.

**G.5.4.24** Cuando se requiere el aislamiento del MGPS, el método preferido de aislamiento físico es por medio de un punto de interrupción en el extremo del “suministro” de la sección de la canalización en la que se ha de trabajar. Esto no se requiere cuando el trabajo afecta solamente a las unidades terminales. Cuando el aislamiento físico no es factible, se debería efectuar una determinación del riesgo para garantizar que el método de aislamiento proporciona la protección adecuada al sistema que permanece operacional.

#### **G.5.5 Procedimiento de gestión de los cambios**

**G.5.5.1** El procedimiento de gestión de los cambios es un procedimiento para gestionar cualquier proceso de cambio en el MGPS, incluyendo las alteraciones y las ampliaciones. También cubre los servicios relacionados para garantizar que se han contemplado todos los riesgos identificados y las consecuencias para garantizar que la seguridad del paciente y la seguridad del operador no están comprometidas.

**G.5.5.2** Cualquier trabajo que implique alteraciones y/o ampliaciones del MGPS debería estar sujeto al procedimiento de gestión de los cambios, antes de que comience ningún trabajo. Esto debería incluir una determinación del riesgo para revisar las implicaciones del cambio y el requisito de registrar cualquier cambio en el MGPS, incluyendo las modificaciones a los dibujos esquemáticos.

Una vez que se ha aprobado la alteración siguiendo los procedimientos de gestión de los cambios, se debería seguir el procedimiento de la autorización del trabajo para garantizar que el MGPS está aislado de forma segura y que el servicio queda restablecido.

#### **G.5.6 Procedimiento de mantenimiento preventivo**

**G.5.6.1** Todas las actividades de mantenimiento se deberían efectuar de acuerdo con las especificaciones técnicas suministradas por el(los) fabricante(s) del MGPS.

**G.5.6.2** Es esencial un enfoque sistemático para contemplar el mantenimiento preventivo de un sistema de canalización de gases medicinales. Este anexo proporciona información que se debería utilizar cuando se constituye un programa de mantenimiento preventivo, pero no incluye las tareas de mantenimiento reales ni las frecuencias del mantenimiento.

**G.5.6.3** Los MGPS deberían estar sujetos a mantenimiento preventivo planificado y la AP debería ser la responsable del mismo.

**G.5.6.4** Todo el trabajo de mantenimiento preventivo efectuado en el MGPS, tanto si el suministro se interrumpe o no, como si es probable que se interrumpa, se debería efectuar solamente bajo las instrucciones de la AP. Cuando es necesario el mantenimiento no planificado, se debería efectuar solamente con la autorización previa de la AP.

**G.5.6.5** El documento de gestión operacional debería disponer claramente las responsabilidades y los procedimientos a seguir para todo el trabajo de mantenimiento en el MGPS.

**G.5.6.6** Se debería emitir una autorización del trabajo antes de efectuar cualquier trabajo de mantenimiento preventivo planificado en un MGPS. Esto incluye todos los exámenes aun cuando no se espera ninguna interrupción del servicio. Cuando se efectúa un trabajo de emergencia no planificado y cuando podría no ser factible obtener una autorización, el trabajo se debería efectuar bajo la supervisión directa de la AP.

**G.5.6.7** El trabajo de inspección y mantenimiento lo debería efectuar el personal con la capacitación y cualificación apropiadas.

**G.5.6.8** La AP debería ser responsable de monitorizar el trabajo de mantenimiento, incluyendo cualquier trabajo efectuado por los contratistas. Puede ser apropiado concertar reuniones en la instalación, cuando sea necesario, con los representantes del contratista para estudiar el progreso.

**G.5.6.9** Todo el trabajo de mantenimiento en el MGPS efectuado por un contratista debería estar cubierto por un contrato formal.

**G.5.6.10** Se debería instruir al contratista sobre los procedimientos de seguridad de la instalación sanitaria y se debería confirmar que cumplirá los requisitos en todo momento.

**G.5.6.11** Todo el personal del contratista debería informar a la AP tras su llegada a la instalación y antes de partir de la misma. El personal del contratista no debería visitar la ubicación de la planta de suministro y del equipo de distribución sin la autorización previa de la AP.

**G.5.6.12** El contratista es responsable de garantizar que el personal que trabaja en cualquier parte del MGPS está capacitado y cualificado de forma apropiada para efectuar el trabajo. No se debería requerir que la instalación sanitaria verifique la competencia del personal del contratista.

**G.5.6.13** El plan de mantenimiento preventivo debería incluir las indicaciones del método para cada tarea específica, la frecuencia recomendada de la tarea, y cualquier registro que se requiera mantener para cada tarea identificada. La indicación del método se debería aplicar a la planta y al equipo reales instalados y debería ser conforme con las instrucciones del fabricante. El plan de mantenimiento preventivo debería definir también quién es responsable del trabajo.

**G.5.6.14** Se debería mantener un cuaderno de mantenimiento para cada producto de la planta. El cuaderno de mantenimiento se debería actualizar después de cada trabajo de mantenimiento planificado o después de cualquier trabajo no planificado efectuado. Puede ser apropiado definir el estado del mantenimiento para cada producto de la planta, proporcionando la fecha en que el trabajo se efectuó por última vez y la fecha del próximo servicio planificado.

**G.5.6.15** Para garantizar que el servicio de mantenimiento se está efectuando conforme con el contrato, la instalación sanitaria debería monitorizar el trabajo y el desempeño del contratista. La AP debería ser responsable de la implementación satisfactoria del contrato de mantenimiento.

**G.5.6.16** La AP debería preparar una lista de comprobación de inspecciones a efectuar y documentar diariamente, para demostrar que el MGPS funciona correctamente. La lista de comprobación se debería basar en las rutinas de inspección especificadas por el fabricante.

**G.5.6.17** El plan de mantenimiento preventivo debería tener en cuenta las recomendaciones del fabricante sobre los requisitos del servicio y las instrucciones de mantenimiento.

Se debería prestar atención particular a

- a) el funcionamiento del sistema y de sus componentes;
- b) las fugas de gas;
- c) el desgaste excesivo de cualquier componente;
- d) la calidad del gas.

Se debería establecer un procedimiento para la notificación inmediata a la AP de equipo defectuoso o sospechoso, para permitir su pronta reparación o sustitución.

**G.5.6.18** La instalación sanitaria debería garantizar que los repuestos adecuados estén prontamente disponibles, según la recomendación del(de los) fabricante(s).

**G.5.6.19** El(los) fabricante(s) del MGPS debería(n) proporcionar a la instalación sanitaria los dibujos esquemáticos completos del MGPS tal como se construyó, las instrucciones de mantenimiento para todos los componentes, los diagramas de los circuitos asociados y cualquier mapa de localización de las válvulas.

**G.5.6.20** La frecuencia del mantenimiento de los componentes en el plan de mantenimiento preventivo se debería basar en la información detallada en los manuales para el equipo y los componentes instalados. La experiencia práctica con el equipo de fabricantes diferentes, y la información de los cuadernos del historial de la planta, podrían originar la necesidad de modificar algunas frecuencias y tareas en instalaciones particulares.

**G.5.6.21** Además del examen, ensayos y comprobaciones dispuestos en el plan de mantenimiento preventivo, se debería disponer una revisión general de todos los MGPS en conjunción con la frecuencia recomendada por el fabricante.

**G.5.6.22** El plan de mantenimiento preventivo debería incluir los ensayos funcionales de los sistemas de suministro auxiliares y de los sistemas de alarma para garantizar que funcionarán cuando se requiera.

La AP debería revisar regularmente el cuaderno de mantenimiento para identificar cualquier componente o equipo que requiera una atención excesiva causada por un diseño defectuoso o por condiciones no satisfactorias de cualquier naturaleza. Las tareas de mantenimiento y su frecuencia se deberían modificar a tenor de la información detallada en el cuaderno de mantenimiento.

**G.5.6.23** Se deberían preparar listas de comprobación del equipo. Las válvulas de corte de zona y los reguladores de presión de la línea se deberían mencionar en la lista de comprobación mediante un número único que corresponda con el número de identificación de la válvula. Normalmente es conveniente disponer estas listas de comprobación de forma tal que se pueda hacer un registro para cada válvula mostrando si ha sido examinada, ensayada o comprobada conforme con el plan de mantenimiento preventivo.

**G.5.6.24** Después de cualquier actividad de mantenimiento, se deberían efectuar los ensayos apropiados conformes con el capítulo 12.

**G.5.6.25** Cualquier instrumento utilizado en el mantenimiento y ensayo de cualquier equipo asociado con el MGPS se debería calibrar frente a un patrón apropiado y los resultados se deberían guardar en un registro.

**G.5.6.26** No se debería trabajar ni efectuar ensayos de presión en ninguna sección del MGPS a menos que esté adecuadamente aislado de cualquier sección en uso o disponible para el uso.

**G.5.6.27** Antes de efectuar cualquier trabajo de mantenimiento preventivo planificado o no planificado en cualquier equipo médico, incluidas las unidades de aspiración portátiles, el equipo se debería descontaminar, siguiendo los procedimientos aprobados.

**G.5.6.28** El documento de gestión operacional debería definir el tiempo de antelación con que la AP debería notificar a los DMO y DNO antes de que se pueda hacer la interrupción del MGPS cuando se efectúa el mantenimiento preventivo planificado. Podría no ser posible proporcionar el mismo tiempo de antelación para cualquier trabajo de mantenimiento de emergencia efectuado en el MGPS.

## **G.5.7 Procedimiento de reparación**

**G.5.7.1** La reparación de cualquier componente defectuoso en el MGPS se debería efectuar de acuerdo con las especificaciones técnicas suministradas por el(los) fabricante(s) del MGPS.



**G.5.7.2** Todo el trabajo de reparación en el MGPS se debería efectuar solamente bajo las instrucciones de la AP, tanto si el suministro se interrumpe o no, como si es probable que se interrumpa.

**G.5.7.3** El documento de gestión operacional debería establecer claramente las responsabilidades y los procedimientos a seguir para todo el trabajo de reparación en el MGPS.

**G.5.7.4** El trabajo de reparación lo debería efectuar personal apropiadamente capacitado y cualificado.

**G.5.7.5** La AP debería ser responsable de monitorizar el trabajo de reparación, incluyendo cualquier reparación efectuada por los contratistas.

**G.5.7.6** Todo el trabajo de reparación en el MGPS efectuado por un contratista debería estar cubierto por un contrato formal por escrito.

**G.5.7.7** El contratista es responsable de garantizar que su personal que trabaja en cualquier reparación está apropiadamente capacitado y cualificado para efectuar el trabajo. No se debería requerir que la instalación sanitaria verifique la competencia del personal del contratista.

**G.5.7.8** Los resultados de cualquier acción emprendida para corregir fallos se debería registrar en el cuaderno de mantenimiento.

**G.5.7.9** Después de cualquier actividad de reparación se deberían efectuar los ensayos apropiados de acuerdo con el capítulo 12 y los resultados deberían registrarse en el cuaderno de mantenimiento.

**G.5.7.10** Cualquier instrumento utilizado en la reparación y ensayo de cualquier equipo asociado con el MGPS se debería calibrar frente a un patrón apropiado y los resultados se deberían guardar en el cuaderno de mantenimiento.

**G.5.7.11** No se debería trabajar ni efectuar ensayos de presión en ninguna sección del MGPS a menos que esté adecuadamente aislado de cualquier sección en uso o disponible para el uso. Este requisito se debería especificar en la autorización del trabajo.

**G.5.7.12** La AP debería notificar al FEM cualquier fallo del equipo recurrente o evidencia de desgaste excesivo del equipo identificado por la DP. El FEM debería evaluar estas observaciones y emprender las acciones correctivas apropiadas.

**G.5.7.13** Todas las operaciones de mantenimiento en las que el vacío está abierto a la atmósfera se deberían efectuar con equipo de protección personal apropiado.

## **G.5.8 Procedimiento de gestión de las fuentes de suministro**

**G.5.8.1** La capacidad de cada fuente de suministro utilizada para suministrar gases medicinales al MGPS se debería basar en la demanda media de la instalación sanitaria, considerando cualquier aumento o reducción de la demanda proyectada para los cinco años siguientes y cualquier factor de diversificación, para tener en cuenta la variabilidad de la demanda.

**G.5.8.2** La instalación sanitaria debería trabajar conjuntamente con el proveedor del gas medicinal y el fabricante del sistema para determinar la ubicación apropiada de cada fuente de suministro utilizando los principios de gestión del riesgo, y para garantizar que es conforme con la reglamentación regional o nacional donde se requiera.

**G.5.8.3** Para los gases medicinales almacenados en la instalación, se debería revisar regularmente la capacidad de la fuente de suministro para garantizar que se almacena producto suficiente en la instalación para mantener el suministro del gas medicinal al MGPS. Cuando se determina que el producto almacenado en la instalación es insuficiente, el proveedor del gas medicinal debería acordar con la instalación sanitaria la revisión de las frecuencias de entrega para mantener los niveles de inventario operacionales o se debería aumentar la capacidad del sistema de almacenamiento en la instalación.

**G.5.8.4** Cualquier aumento anticipado de la demanda debido a ampliaciones de la instalación del hospital, a ampliaciones de la canalización o a cambios en la práctica clínica se debería notificar al proveedor del gas medicinal para garantizar que los cambios no ponen en peligro la seguridad del suministro.

**G.5.8.5** La demanda de gas medicinal se debería revisar y documentar con el proveedor del gas al menos anualmente (o después de una ampliación significativa de la canalización que origina aumentos en la demanda) para reevaluar la capacidad de la instalación. Conforme la demanda crece, aumentarán los requisitos del volumen de almacenamiento. Con el aumento de los requisitos del volumen para el inventario de reserva, se reducirá el volumen disponible para el inventario operacional. Habiendo revisado la demanda diaria media con el proveedor del gas, puede ser necesario revisar las frecuencias de entrega para mantener los niveles del inventario operacional o para aumentar la capacidad de los sistemas de almacenamiento en la instalación.

**G.5.8.6** Cuando estén disponibles, se deberían revisar los registros del consumo de gas histórico para evaluar la utilización actual y el crecimiento o la reducción de la demanda del gas medicinal. Las predicciones de crecimiento se deberían basar en cualquier ampliación planificada de la instalación o de los sistemas de canalización y en los cambios en la práctica clínica que podrían repercutir sobre la demanda del gas medicinal.

**G.5.8.7** Para las instalaciones sanitarias nuevas, donde no existe disponible información del consumo histórico, la demanda estimada se debería basar en el tamaño y tipo propuestos de la instalación y/o, en los casos en que la nueva instalación es una sustitución, en el volumen de utilización de las instalaciones que se van a sustituir.

**G.5.8.8** Cuando la fuente secundaria incluye botellas de gases comprimidos, el tamaño del conector de distribución de recambio y el número de botellas almacenadas en la instalación se deberían basar en la capacidad del proveedor del gas de garantizar la entrega dentro de un periodo definido.

**G.5.8.9** Debería existir un número adecuado de individuos capacitados disponibles para garantizar que las botellas se pueden cambiar en el conector de distribución de forma suficientemente rápida para satisfacer la demanda.

**G.5.8.10** El periodo de entrega para la fuente primaria se debería basar en la frecuencia de entrega normal del proveedor. El periodo de entrega para la fuente secundaria se debería basar en las condiciones de emergencia cuando la fuente primaria no está disponible. En estas circunstancias, el proveedor del gas debería acordar tiempos de respuesta de entrega especiales y no deberían normalmente ser inferiores a 24 h.

**G.5.8.11** La capacidad de la fuente de suministro primaria y secundaria se debería determinar mediante el proceso de gestión del riesgo y se debería especificar como el inventario para un número de días.

La determinación de los riesgos debería considerar los aspectos siguientes:

- la demanda diaria media estimada al final del periodo de contrato. Se necesitará considerar cualquier cambio en la predicción de demanda así como los cambios hechos en la capacidad del tanque o en la frecuencia de entrega en el momento apropiado dentro del periodo de contrato. Puede ser conveniente establecer un nivel de demanda diaria, alcanzado el cual se considerarán los cambios en la capacidad del tanque o en la frecuencia de entrega;
- la frecuencia de entrega debería tener en cuenta y contemplar la revisión del acceso de vehículos a los recipientes de almacenamiento, el calendario de entregas y cualquier restricción debida a los requisitos de planificación local;
- las capacidades de los proveedores del gas medicinal para proporcionar un suministro fiable;
- el tipo y la dependencia de los pacientes que se están tratando en la instalación sanitaria;
- la variabilidad del patrón de utilización de la instalación, teniendo en cuenta las variaciones estacionales o los requisitos adicionales del plan de incidencias importantes de la instalación;
- la utilización de telemetría para transmitir electrónicamente los niveles de inventario al proveedor del gas o a la instalación sanitaria.

**G.5.8.12** La utilización de sistemas de telemetría dispuestos en la instalación permite tanto a la instalación sanitaria como al proveedor de gas supervisar los niveles de inventario, permitiendo un uso más eficaz del inventario operacional y un inventario de reserva más pequeño.

**G.5.8.13** El inventario de reserva se debería expresar como el número de días de inventario. Cuando la demanda diaria aumenta, crecerá el volumen requerido, reduciendo el volumen del inventario operacional disponible.

**G.5.8.14** El nivel mínimo del inventario para la fuente de suministro secundaria se debería basar en las circunstancias excepcionales cuando el sistema de la fuente de suministro primaria no está disponible para el uso.

El nivel de inventario de reserva de la fuente de suministro secundaria dependerá de

- la proximidad del almacén de distribución del proveedor,
- el tiempo que el proveedor del gas necesita para hacer una entrega en estas condiciones,
- la frecuencia de entrega que se puede mantener cuando la fuente de suministro primaria no está disponible para el uso.

**G.5.8.15** En la mayoría de las condiciones, las botellas de gas comprimido son el método más apropiado de proporcionar un suministro de reserva. La solución preferible para el diseño de los sistemas de reserva es instalar conectores de distribución individuales en cada zona del sistema de canalización, para obtener una protección adicional frente a la posibilidad de un fallo de la canalización dentro de la instalación. La ubicación de estos conectores de distribución es muy importante para garantizar que las zonas de suministro crítico y de alta dependencia definidas en el proceso de gestión del riesgo tienen disponibles los inventarios adecuados de gases medicinales en el caso de un fallo del MGPS.

**G.5.8.16** En las zonas de cuidados críticos con pacientes de alta dependencia, la instalación sanitaria debería considerar el uso de botellas individuales para minimizar cualquier retraso en mantener los suministros de gas en una emergencia. Se deberían utilizar botellas con válvulas integradas o botellas con reguladores de presión acoplados para este fin: la salida del regulador de presión debería ser selectiva del gas y estar conectada a un latiguillo de baja presión.

**G.5.8.17** Cuando los gases medicinales se fabrican o mezclan en la propia instalación, están sujetos a la misma reglamentación o normas que los gases suministrados por otras fuentes. En particular, se debería implementar un sistema de gestión de la calidad (SGC), (basado en los principios de las normas de correcta fabricación), para gestionar la producción y el suministro de los gases.

**G.5.8.18** Cuando se utilizan sistemas de suministro con concentradores de oxígeno, el personal médico debería tener en cuenta el rango de la concentración de oxígeno especificado por el fabricante del sistema de suministro.

**G.5.8.19** La funcionalidad de las fuentes de suministro secundaria y de reserva se debería ensayar a intervalos regulares utilizando un procedimiento definido y los resultados se deberían documentar en el cuaderno de mantenimiento. Después de los ensayos, se debería revisar la condición de las fuentes de suministro secundaria y de reserva y se deberían proporcionar suministros adicionales cuando proceda. Los procedimientos de ensayo deberían tener en cuenta las especificaciones definidas por el fabricante y aprobadas por la AP.

**G.5.8.20** El sistema de alarma en los sistemas de suministro de gases medicinales se debería ensayar a intervalos regulares de acuerdo con un procedimiento definido y los resultados se deberían documentar en el cuaderno de mantenimiento. Los procedimientos de ensayo para el sistema de alarma deberían tener en cuenta las especificaciones definidas por el fabricante y aprobadas por la AP.

## **G.5.9 Procedimiento de almacenamiento y manipulación de botellas**

**G.5.9.1** Los procedimientos de almacenamiento y manipulación de botellas deberían cubrir los aspectos operacionales de todas las botellas de gases medicinales utilizadas dentro de la instalación sanitaria, incluyendo los requisitos de almacenamiento, manipulación y seguridad general.

**G.5.9.2** La gestión de las botellas de gases medicinales dentro de la instalación sanitaria debería ser responsabilidad de la AP o del QC y se debería definir en el documento de gestión operacional. La manipulación y/o conexión de las botellas al conector de distribución se debería permitir solamente a las personas capacitadas y aprobadas para ello.

**G.5.9.3** Las botellas de gases medicinales se deberían almacenar en una zona de almacenamiento de botellas de gases medicinales, ya sea en un almacén designado que es parte del edificio de la instalación sanitaria o en un edificio separado de almacenamiento de botellas construido especialmente. La zona se debería utilizar exclusivamente para el almacenamiento de botellas de gases medicinales. Estos almacenes de botellas deberían estar resguardados, provistos de ventilación adecuada y se deberían proteger del robo y uso no autorizado. No deberían estar ubicados próximos a ninguna instalación que pueda representar un riesgo de incendio u otro peligro. Se debería prohibir fumar o el uso de llamas desnudas en las proximidades. Las salas de la planta que contienen botellas de gases medicinales se deberían mantener cerradas con llave, con un cartel prominente que indique la ubicación de la llave.

**G.5.9.4** Se desaconseja firmemente el uso de adaptadores con las botellas de gases medicinales debido al riesgo de administrar el gas equivocado al paciente.

**G.5.9.5** Debido a los peligros relacionados con el llenado de botellas a alta presión, a la necesidad de efectuar los procedimientos de transvase en condiciones de acuerdo con normas correctas de fabricación y al requisito de mantener la trazabilidad de todos los medicamentos, se desaconseja vehementemente el transvase de botellas de gases medicinales.

**G.5.9.6** En las zonas de almacenamiento de botellas las botellas de gases medicinales deberían estar segregadas de las botellas de gas industrial.

Las botellas de gases medicinales se deberían almacenar de forma que exista segregación de las botellas llenas y vacías y de las botellas de gases diferentes.

NOTA Los requisitos sobre la separación/distancias entre los tipos de gases diferentes se definen en la reglamentación local o en las recomendaciones industriales.

**G.5.9.7** Las botellas de gases medicinales se deberían gestionar de forma que se utilicen según un esquema “primera en entrar, primera en salir” para garantizar una rotación correcta del inventario. Se deberían conservar los precintos de evidencia de manipulación inexperta en las salidas de la válvula hasta que la botella se requiera para el uso.

**G.5.9.8** La AP debería ser consciente de los peligros relacionados con el almacenamiento, transporte y utilización de las botellas de gas. El proveedor de la botella de gas es responsable de suministrar a la instalación sanitaria la información adecuada sobre el uso y la manipulación segura de todas las botellas.

**G.5.9.9** Los requisitos para el almacenamiento de botellas de gases medicinales se aplican tanto a las zonas de almacenamiento principal de las botellas como al almacenamiento de las botellas en uso en los departamentos del hospital o en la proximidad de un conector de distribución conectado al MGPS.

**G.5.9.10** Se deberían utilizar señales y avisos de advertencia de seguridad donde proceda y situados en posiciones prominentes.

**G.5.9.11** Los almacenes de botellas se deberían ubicar lo más cerca posible del punto de entrega del suministro. Siempre que sea posible, debería existir solamente un punto de suministro de entrega para cada instalación. El estacionamiento de vehículos, que no sea para la carga y descarga de botellas, no se debería permitir dentro de la zona de entrega y almacenamiento.

**G.5.9.12** La ubicación de la zona de almacenamiento de botellas se debería marcar claramente en el plano de la instalación para facilitar la identificación en caso de una emergencia.

**G.5.9.13** Las botellas las debería manipular solamente el personal capacitado para la manipulación de botellas y que entiende los peligros potenciales. Se debería utilizar solamente equipo diseñado y aprobado específicamente para la manipulación y el transporte de las botellas de gases medicinales.

**G.5.9.14** Las botellas y las válvulas se deberían mantener exentas de aceite, grasa y otros detritos. Se debería inspeccionar la evidencia de aceite, grasa y otros detritos en la salida de la válvula de la botella antes de conectarla al conector de distribución o a un regulador de presión. Las botellas con evidencia de contaminación en la salida de las válvulas se deberían etiquetar como tal y devolver al proveedor de la botella.

**G.5.9.15** Cuando se usan fluidos de detección de fugas patentados para detectar las fugas entre la válvula de la botella y el conector de distribución, se deberían utilizar con moderación y cualquier exceso se debería limpiar con un paño húmedo limpio después del uso para evitar la contaminación posible. Los fluidos de detección de fugas patentados no se deberían utilizar para los ensayos de fugas en las salidas de la válvula de las botellas.

**G.5.9.16** No se debería usar una fuerza excesiva para conectar un conector de distribución o un regulador de presión a la válvula de la botella, pues ello puede dañar la salida de la válvula. Si se detecta una fuga entre la válvula de la botella y el conector de distribución o el regulador de presión, el conector de distribución o el regulador de presión se deberían despresurizar y se debería retirar la botella. La junta existente se debería inspeccionar y sustituir si es necesario. Los compuestos de sellado o los adhesivos no se deberían utilizar nunca para detener una fuga.

**G.5.9.17** El documento de gestión operacional debería cubrir el control y la retirada de equipo defectuoso para impedir su utilización con las botellas de alta presión. Las botellas defectuosas se deberían etiquetar y devolver al proveedor de la botella.

**G.5.9.18** Bajo ninguna circunstancia se deberían efectuar reparaciones de las válvulas de las botellas. Si se sospecha un fallo de la válvula de la botella, la botella se debería etiquetar como tal y devolverla inmediatamente al proveedor de la botella.

**G.5.9.19** Puede existir reglamentación local aplicable a las precauciones generales contra incendios relacionadas con el almacenamiento de botellas de alta presión.

**G.5.9.20** Todo el equipo médico utilizado con las botellas de gas de alta presión debería estar sujeto al mantenimiento preventivo. Se debería utilizar solamente el equipo diseñado para uso con el gas selectivo. Cuando el equipo está conectado a una botella, la válvula de la botella se debería abrir inicialmente de forma lenta y después abrirla totalmente.

**G.5.9.21** El número de botellas en las salas de conectores de distribución se debería restringir al mínimo requerido para fines operacionales y de reserva. En la sala de conectores de distribución solamente se deberían guardar las botellas de los gases requeridos para la conexión al conector de distribución. La sala de conectores de distribución no se debería utilizar para ningún otro propósito, aunque se puede hacer una excepción para el almacenamiento de botellas de la mezcla óxido nitroso/oxígeno en carros para permitir el equilibrado de la temperatura antes del uso.

**G.5.9.22** Los inventarios principales de botellas de oxígeno, de óxido nitroso, de aire para uso médico comprimido y de otros gases medicinales se deberían almacenar en la zona de almacenamiento de botellas designada, protegidos de la intemperie. Ningún otro material se debería guardar en la zona de almacenamiento de botellas.

#### **G.5.10 Procedimiento de compra de equipo médico**

**G.5.10.1** Se debería consultar a la AP antes de la compra de cualquier equipo médico que se conecte al MGPS. Esto es para garantizar que el MGPS tiene una capacidad suficiente y que puede suministrar los caudales requeridos a las presiones especificadas. Es particularmente importante consultar a la AP antes de que cualquier equipo nuevo, tal como un ventilador, sea conectado al sistema de aire para uso médico, para garantizar que no se sobrepasa la capacidad del sistema.

**G.5.10.2** El documento de gestión operacional debería indicar los procedimientos a seguir y el personal que necesita ser consultado antes de conectar un equipo médico nuevo al MGPS.

**G.5.10.3** Se debería utilizar solamente equipo médico compatible con la concentración de oxígeno suministrada.

**G.5.11 Procedimiento de gestión de los contratistas**

**G.5.11.1** Los requisitos para los contratistas son diferentes, dependiendo de las actividades a efectuar. Los requisitos para el mantenimiento y las actividades de reparación son inferiores a los correspondientes para los sistemas, alteraciones o ampliaciones de la canalización, que incluyen el diseño, la instalación y los ensayos.

**G.5.11.2** Todos los contratistas deberían cumplir las políticas de seguridad de la instalación sanitaria. Esto se debería indicar claramente en el documento de gestión operacional.

**G.5.11.3** El trabajo en los MGPS lo debería efectuar solamente personal capacitado o empresas especialistas certificadas según la Norma ISO 13485<sup>[20]</sup> y cuyo campo de certificación esté definido como el diseño, la instalación, la puesta en servicio y el mantenimiento del MGPS según proceda. La evidencia de certificación vigente se debería demostrar mediante certificados válidos vigentes.

**G.5.11.4** El documento de gestión operacional debería establecer las responsabilidades de la supervisión del trabajo de los contratistas. Esto lo debería coordinar la AP. Los procedimientos para convocar a un contratista, en caso de un único fallo o en una emergencia, se deberían disponer en el documento de gestión operacional.

## Anexo H (Informativo)

### Justificación de los requisitos

El anexo H contiene las explicaciones de justificación para algunos de los requisitos de esta norma internacional. Se incluye para proporcionar un entendimiento adicional de las razones en las que se basan los requisitos y recomendaciones que se han incorporado en esta norma internacional. Se considera que el conocimiento de las razones en las que se basan los requisitos no solo facilitará la aplicación apropiada de esta norma internacional, sino también agilizará cualquier revisión subsiguiente de la misma.

La numeración de la justificación siguiente corresponde a la numeración de los capítulos en esta parte de la Norma ISO 7396. Por tanto, la numeración no es consecutiva.

**H.1** Los concentradores de oxígeno se pueden utilizar para suministrar oxígeno 93 a un sistema de canalización de gases medicinales como un sustituto del oxígeno medicinal. Dado que el oxígeno 93 no está cubierto por una monografía de la farmacopea en todos los territorios, la reglamentación regional o nacional podría impedir su utilización como un sustituto del oxígeno.

**H.1.5** Los requisitos del caudal, presión y capacidad de almacenamiento para el aire comprimido utilizado para presurizar cámaras hiperbáricas, para mantener las condiciones ambientales internas requeridas y para hacer funcionar otros servicios conectados (por ejemplo, el sistema de extinción de incendios) son diferentes de los especificados en esta parte de la Norma ISO 7396 para el aire para uso médico y para el aire motriz para instrumentos quirúrgicos.

**H.1.6** El vacío para aplicaciones odontológicas no se considera en esta parte de la Norma ISO 7396 aunque existen aplicaciones odontológicas que pueden solaparse con aplicaciones medicinales.

El vacío para aplicaciones odontológicas es típicamente un sistema “húmedo” cuya función es eliminar por aspiración el líquido y los sólidos en el lugar del tratamiento. El vacío para uso médico es un sistema “seco”, en el que todos los residuos se capturan antes de la entrada al sistema.

En la cirugía oral, cirugía maxilofacial y otros procedimientos, el vacío para uso médico se puede utilizar en lugar del vacío para aplicaciones odontológicas o conjuntamente con el mismo, que puede ser una indicación para la provisión de vacío para uso médico en departamentos odontológicos específicos.

Los sistemas funcionan normalmente a valores diferentes del caudal y de la presión de vacío y deberían mantenerse separados.

Las bombas de vacío generan temperaturas altas durante el proceso de compresión que, en combinación con atmósferas de gases y vapores anestésicos, pueden provocar incendios dentro de las bombas de vacío.

**H.4.1** Una condición de fallo puede permanecer no detectada durante un periodo de tiempo largo y, como consecuencia, puede originar un suceso catastrófico. Tal condición de fallo no se puede considerar como una condición de primer fallo. Se deberían determinar las medidas específicas de control de los riesgos dentro del proceso de gestión del riesgo para tratar tales condiciones.

**H.4.2** La evidencia se proporcionará, por ejemplo, a un organismo notificado durante la evaluación de la conformidad y cuando así lo solicita la autoridad competente. Se llama la atención sobre la Norma ISO 14971 sobre la gestión del riesgo y sobre las normas en desarrollo por el Comité Técnico ISO/TC 210 sobre la evaluación del riesgo y el control del riesgo.

**H.4.3.2** Los componentes del sistema de canalización para gases diferentes se hacen a menudo utilizando partes o subensamblados intercambiables. El requisito de la limpieza, se debería por tanto aplicar a los componentes para todos los gases.

**H.4.3.1, H.4.3.2, H.4.3.4, H.4.3.5, H.4.3.6, H.4.3.8** La evidencia se proporcionará, por ejemplo, a un organismo notificado durante la evaluación de la conformidad y cuando así lo solicita la autoridad competente.

**H.5.2.2.1** Algunas actividades se efectúan en los sistemas de canalización y sus componentes a intervalos regulares, en particular en los sistemas de suministro; típicamente la sustitución de botellas o bloques de botellas y el mantenimiento preventivo (planificado). Durante el mantenimiento preventivo en una fuente de suministro (o durante la sustitución de una botella o bloque de botellas), tal fuente es incapaz de abastecer al sistema de canalización. Si la continuidad del suministro es un requisito absoluto, en caso de producirse el fallo de una segunda fuente de suministro, existe la tercera que puede abastecer al sistema de canalización. Cuando no se requiere la continuidad del suministro (por ejemplo, en instalaciones en las que el servicio no es continuo o donde el servicio suministrado no se considera de soporte vital) y por tanto, el mantenimiento preventivo u otras actividades que dan lugar a la interrupción del suministro se pueden efectuar cuando el sistema de suministro no está funcionando, dos fuentes de suministro son suficientes. Esta situación ya ha sido reconocida para los sistemas de suministro para aire y nitrógeno motriz para instrumentos quirúrgicos: no son necesarias tres fuentes de suministro; dos son suficientes (véase 5.5.2.5).

**H.5.2.9** No debería permitirse que un esterilizador que genera ozono se conecte a una unidad terminal de oxígeno. El ozono es muy reactivo y muy peligroso.

Las personas que reciben oxigenoterapia y otras con sistemas respiratorios dañados son particularmente susceptibles a los efectos del ozono. Incluso las personas sanas, si se exponen a concentraciones bajas de ozono durante unas pocas horas mientras hacen ejercicio físico, pueden experimentar problemas de salud.

**H.5.3.4** Se sabe que la ignición de latiguillos de alta presión recubiertos de polímero ha ocurrido en varios países (por ejemplo, como resultado de una compresión adiabática). La descomposición de ciertos polímeros puede ocurrir a temperaturas que se pueden producir por compresión adiabática. Los productos de la descomposición y combustión de algunos polímeros se sabe que son extremadamente tóxicos. Por tanto, la Norma ISO 21969 requiere que no esté permitida la utilización de latiguillos recubiertos de polímero.

**H.5.4.2** El gas licuado estará muy frío y puede hacer que el material en contacto se haga deleznable, lo que a su vez puede causar que el material se fracture. Por consiguiente, es importante que los materiales que puedan estar expuestos a temperaturas muy bajas en condición de primer fallo puedan resistir esta temperatura sin ningún riesgo de rotura.

**H.5.5.1.2** Los productos y sistemas enumerados en el apartado 5.5.1.2 no se utilizan para suministrar aire medicinal a los pacientes y podrían no estar sujetos a los requisitos de limpieza de los sistemas de canalización de gases medicinales. Por tanto, es esencial impedir el reflujo para evitar la contaminación de las canalizaciones de aire medicinal.

**H.5.5.2.1, H.5.5.2.2 y H.5.5.2.4** La experiencia en varios países durante muchos años ha mostrado que las especificaciones dadas en estos capítulos son adecuadas para el aire medicinal y el aire motriz para instrumentos quirúrgicos, siempre que el sistema de suministro se mantenga de forma apropiada. La Comisión de la Farmacopea Europea (EPC) ha publicado una monografía sobre el "aire medicinal"<sup>[35]</sup>.

**H.5.5.2.7** El depósito se puede instalar aguas arriba o aguas abajo de la unidad acondicionadora. Existen argumentos convincentes para la instalación en ambas ubicaciones.

**H.5.5.2.15** Existe un número de problemas (por ejemplo, grado de limpieza del interior de la botella, riesgo de rotura a alta presión, trazabilidad, corrosión) que han de considerarse antes del llenado de una botella con un gas medicinal. Por tanto, se desaconseja vehementemente el llenado de botellas transportables en una instalación sanitaria. Los requisitos para el llenado de botellas transportables en la instalación sanitaria están por tanto fuera del campo de aplicación de esta parte de la Norma ISO 7396.



Un depósito de alta presión conectado a un compresor permanentemente instalado no está normalmente sometido a ningún ingreso de impurezas y los conectores y los tubos están instalados y controlados de forma permanente. El riesgo es por tanto reducido y el depósito puede por ello ser rellenado en la propia instalación.

El rellenado repetido del depósito de alta presión puede dar lugar a la acumulación de impurezas. Se debería planificar el vaciado periódico del depósito de alta presión.

**H.5.8.2** Las temperaturas bajas pueden originar una pérdida de presión en las botellas de óxido nitroso y dióxido de carbono. Las temperaturas bajas pueden también causar la licuación del óxido nitroso en botellas de mezclas de oxígeno/óxido nitroso, originando el suministro de una mezcla de gas de composición incorrecta. Las temperaturas altas pueden originar presiones altas y una pérdida posible de gas de las botellas dotadas de un medio que libere la sobrepresión. Las temperaturas altas pueden causar el funcionamiento defectuoso de los compresores de aire y de las bombas de vacío.

**H.6.2.3** Las conexiones de potencia eléctrica para los sistemas de monitorización y alarma requieren un grado de separación de los otros circuitos eléctricos.

**H.6.3.2.3** El periodo de silenciamiento máximo de 15 min es apropiado porque el equipo en zonas críticas tales como los monitores del paciente, los ventiladores y las estaciones de anestesia, reactiva por sí mismo las alarmas de alta prioridad a intervalos más cortos.

**H.6.6** En algunos países, se especifica que los sensores de las alarmas de funcionamiento de emergencia estén aguas arriba de la válvula de corte del suministro, y en otros países, se especifica que los sensores estén aguas abajo de la válvula de corte del suministro. Existen argumentos persuasivos para su instalación en ambas ubicaciones.

**H.7.2.1** Estas condiciones son necesarias para mantener la seguridad del paciente protegiendo el sistema de canalización de gases medicinales de la contaminación producida por reflujo.

El daño de contaminación cruzada se sabe que se produjo relacionado con productos sanitarios que utilizan fuentes de diversos gases debido a fugas de gas por reflujo.

Con productos sanitarios que tienen conectores de entrada de gas para gases diferentes, el peligro es contaminación de una fuente de gas por gas proveniente de otra fuente. El peligro de contaminación es altamente probable que ocurra mientras el producto sanitario permanece conectado a los suministros de gas aunque no exista ningún caudal de consumo del sistema de suministro de gas.

Con un ventilador equipado con más de un conector de entrada para gases diferentes, la existencia incluso de muy pequeñas fugas de uno de los sistemas de gas al interior de otro puede causar una acumulación considerable de contaminación en un sistema de canalización de gases medicinales si se produce durante periodos largos de tiempo aunque el caudal de consumo de gas sea pequeño.

La contaminación de óxido nitroso por aire u oxígeno es preferible a la situación inversa.

**H.7.2.5, H.7.2.6** La evidencia se proporcionará, por ejemplo, a un organismo notificado durante la evaluación de la conformidad y cuando así lo solicita la autoridad competente.

Los discos de ruptura no están permitidos como un medio de liberar la sobrepresión dado que su funcionamiento puede originar la pérdida completa de la presión en una canalización.

**H.7.4.1** El apartado 5.2.2 exige la continuidad del suministro a las unidades terminales en la condición normal y en condición de primer fallo. Dos reguladores de presión de la línea conectados de forma permanente permitirán el cumplimiento de los requisitos de continuidad del suministro cuando falle un regulador de presión.

**H.12.6.2** La razón para ensayar las válvulas de corte de zona es que se requiere que estas válvulas cierren en una emergencia. Los ensayos equivalentes de otras válvulas de corte no son prácticos.

**H.12.6.7** La evidencia se proporcionará, por ejemplo, a un organismo notificado durante la evaluación de la conformidad y cuando así lo solicita la autoridad competente.

## **Anexo I (Informativo)**

### **Justificación de los requisitos para los peligros derivados de la utilización de compresores**

Los requisitos del apartado 5.5 permiten diferentes construcciones de compresor siempre que puedan proporcionar la calidad especificada en el apartado 5.5.2.1.

Las diversas tecnologías comúnmente utilizadas se pueden clasificar en tres grupos generales: Lubricados con aceite (que requieren aceite como lubricante para su funcionamiento normal), exentos de aceite (que tienen aceite en el extremo del mecanismo de la máquina, pero están diseñados para impedir que el aceite llegue al extremo que suministra el aire), y sin aceite (dotados de rodamientos sellados y que no tienen ni aceite ni grasa suelta en ningún lugar de la máquina).

Los fundamentos compartidos del diseño dentro de cada uno de estos grupos implican peligros específicos que el usuario debería considerar en su determinación del riesgo para cualquier compresor a utilizar para aire para uso médico. Estos peligros se resumen en la tabla I.1. Se advierte también al usuario que los diseños de los compresores varían y que diseños diferentes están sujetos a peligros específicos para un compresor o instalación particular que deberían también tenerse en cuenta.

Tabla I.1

| Categoría del peligro | Lubricados con aceite                                                                                                                                                                                                                                                                                  | Exento de aceite                                                                                                                                                                                                                                                                                                                                       | Sin aceite                                                                                                                                                                                                                           |
|-----------------------|--------------------------------------------------------------------------------------------------------------------------------------------------------------------------------------------------------------------------------------------------------------------------------------------------------|--------------------------------------------------------------------------------------------------------------------------------------------------------------------------------------------------------------------------------------------------------------------------------------------------------------------------------------------------------|--------------------------------------------------------------------------------------------------------------------------------------------------------------------------------------------------------------------------------------|
| Químico               | El aceite lubricante estándar es tóxico, inflamable cuando se mezcla con oxígeno y puede causar neumonías inducidas por hidrocarburos. Es normal que exista aceite, tanto en estado líquido como en estado de vapor, en el aire que sale del compresor                                                 | El aceite lubricante estándar es tóxico, inflamable cuando se mezcla con oxígeno y puede causar neumonías inducidas por hidrocarburos. Los compresores exentos de aceite pueden expulsar aceite en forma líquida o de vapor en determinadas condiciones de fallo parcial (por ejemplo, fallo de las juntas o anillos de estanquidad rotatorios)        | No procede                                                                                                                                                                                                                           |
| Térmico               | El aceite puede arder, produciendo CO, CO <sub>2</sub> , hidrocarburos, hollín y otros productos de combustión                                                                                                                                                                                         | Las juntas de estanquidad y las faldas del pistón deslizantes están hechas típicamente de carbono o politetrafluoroetileno y pueden producir gases tóxicos si se calientan excesivamente                                                                                                                                                               | Las juntas de estanquidad y las faldas del pistón deslizantes están hechas típicamente de carbono o politetrafluoroetileno y pueden producir gases tóxicos si se calientan excesivamente                                             |
| Mecánico              | El agua se puede condensar en el compresor en condiciones de utilización infrecuente cuando el contenido en humedad de la admisión de aire es alto. Esta agua puede formar una emulsión con el aceite y causar el fallo prematuro del compresor                                                        | Algunas de estas tecnologías requieren tolerancias internas con ajustes muy exactos. El funcionamiento fuera de los límites de temperatura puede causar que se produzca un contacto metal-metal, dando lugar a un fallo catastrófico.<br><br>Algunas máquinas pueden expulsar aceite si su funcionamiento se detiene y se reinicia de forma incorrecta | Algunas de estas tecnologías requieren tolerancias internas con ajustes muy exactos. El funcionamiento fuera de los límites de temperatura puede causar que se produzca un contacto metal-metal, dando lugar a un fallo catastrófico |
| Mantenimiento         | El sobrellenado de aceite puede aumentar la cantidad del mismo expulsado en el aire producido. No cambiar y rellenar el aceite puede dar lugar al sobrecalentamiento o fallo prematuro del compresor. No cambiar el absorbedor de carbono puede dar lugar a la transmisión de vapores de hidrocarburos | Estas máquinas contienen aceite y requieren que se cambie periódicamente.<br><br>Estas máquinas requieren la sustitución periódica de juntas y rodamientos. No cumplir el calendario de sustitución programado puede dar lugar a un fallo catastrófico                                                                                                 | Estas máquinas requieren la sustitución periódica de juntas móviles (que se gastan y han de sustituirse) y rodamientos. No cumplir el calendario de sustitución programado puede dar lugar a un fallo catastrófico                   |
| Ambiental             | Desecho de aceite, de absorbedor de aceite y de elementos adsorbedores de olores y sabores                                                                                                                                                                                                             | Desecho de aceite, y de elementos absorbedores de olores y sabores                                                                                                                                                                                                                                                                                     | Desecho de elementos adsorbedores de olores y sabores                                                                                                                                                                                |
| Protecciones usuales  | Separador de aceite-aire<br>Monitor del nivel de aceite<br>Monitor de alta temperatura<br>Absorbedor de carbón activo de alta capacidad<br>Absorbedor de olores y sabores                                                                                                                              | Monitor del nivel de aceite<br>Monitor de alta temperatura<br>Absorbedor de olores y sabores                                                                                                                                                                                                                                                           | Monitor de alta temperatura<br>Absorbedor de olores y sabores                                                                                                                                                                        |

## Anexo J (Informativo)

### Consideraciones sobre la implementación y utilización de oxígeno 93

Los concentradores de oxígeno se pueden utilizar para suministrar oxígeno 93 a un sistema de canalización de gases medicinales. Los concentradores de oxígeno que abastecen a sistemas de canalización se han estado utilizando en instalaciones sanitarias de todo el mundo durante más de 30 años y la experiencia obtenida de la utilización de los concentradores de oxígeno para suministrar oxígeno 93 a los sistemas de canalización de gases medicinales va en aumento. El propósito de este anexo es identificar las consideraciones que deberían tenerse en cuenta antes de que el oxígeno 93 producido por un concentrador de oxígeno se utilice como fuente de suministro para un sistema de canalización de gases medicinales, cuando la reglamentación regional o nacional permita su utilización.

El proceso que permite la producción en la propia instalación de oxígeno 93 se basa en la separación física de oxígeno, nitrógeno y otros componentes del aire ambiente tales como el argón. Este proceso se ha utilizado durante muchos años en concentradores de oxígeno móviles pequeños que suministran caudales hasta un máximo de 5 l/min con concentraciones de oxígeno no inferiores a 82% (véase IEC 80601-2-60). Se han desarrollado sistemas diferentes que permiten caudales más altos y garantizan concentraciones mayores de oxígeno para cuando se requieren caudales superiores, tales como los necesarios para abastecer a un sistema de canalización en una instalación sanitaria.

Cuando se utilizan concentradores de oxígeno, se pueden utilizar otras fuentes de oxígeno medicinal como la fuente secundaria y/o de reserva para abastecer al sistema de canalización cuando falla el concentrador. Esto podría dar lugar a una variación de la concentración de oxígeno del gas disponible para administración al paciente. (Véase la NOTA en 1.2).

Se han publicado al menos dos monografías sobre el gas producido por concentradores de oxígeno: correspondientes a la farmacopea estadounidense norteamericana y a la farmacopea europea. Ambas monografías publicadas se denominan "oxígeno 93 por ciento" y especifican la concentración de oxígeno como  $(93 \pm 3)\%$ .

Sin embargo, existen concentradores de oxígeno que pueden suministrar oxígeno con una concentración superior a 96%.

NOTA La reglamentación nacional, regional o local puede estipular concentraciones de oxígeno mínimas y/o rangos de concentraciones de oxígeno diferentes de aquéllos especificados en esta norma internacional.

La sustitución, dentro de una instalación sanitaria, de un sistema de suministro de oxígeno existente por un sistema de suministro diferente requiere que la dirección de la instalación sanitaria considere todos los aspectos referentes a su utilización segura. La decisión de cambiar el sistema de suministro de oxígeno por otro se debería basar en un proceso de gestión del riesgo documentado.

Los aspectos a considerar incluyen entre otros los siguientes:

- la aprobación para utilizar oxígeno 93, acordada por la dirección de la instalación sanitaria, incluido el departamento de anestesia, y las unidades de cuidados críticos;
- la información suministrada al personal médico y la formación impartida al mismo sobre la utilización segura de oxígeno 93 como parte de los protocolos de garantía de la calidad de la instalación sanitaria;
- la concentración del gas en las unidades terminales, que puede variar, en cualquier momento y sin previo aviso al operador, de la forma siguiente:
  - a) desde el 90% hasta aproximadamente 100% cuando se utiliza oxígeno en botellas, bloques de botellas o depósito(s) de alta presión o recipientes criogénicos dentro de las fuentes de suministro secundaria y de reserva.
  - b) desde el 90% a 96% cuando se utiliza solamente oxígeno 93 (esto ocurre por ejemplo cuando un sistema de llenado asociado con el concentrador de oxígeno se utiliza para llenar uno o más depósitos de alta presión/botellas/bloques de botellas instaladas dentro de la fuente de suministro secundaria y de reserva conteniendo oxígeno 93);

- la compatibilidad con una concentración de oxígeno variable, de los productos sanitarios previstos para ser conectados a las unidades terminales, en particular en lo referente a la calibración. Además, debería considerarse la calibración de los caudalímetros y mezcladores de gases para tener en cuenta el rango de concentraciones de oxígeno producidas por el sistema de canalización y los ajustes hechos cuando se utilizan diferentes concentraciones de oxígeno;
- las consideraciones, hechas por la dirección de la instalación sanitaria, sobre si este sistema es adecuado para el uso previsto teniendo en cuenta la seguridad del paciente y la situación ambiental dentro de la instalación sanitaria, de acuerdo con los procedimientos de gestión del riesgo antes de disponer la compra del sistema. Estas consideraciones pueden incluir una determinación del riesgo que conlleva la administración de oxígeno 93 en un sistema de canalización existente;
- la consideración sobre el riesgo potencial que surge si se utilizan conectores selectivos de gas para oxígeno y oxígeno 93 (por ejemplo, incompatibilidad entre botellas de oxígeno portátiles equipadas con reductores de presión integrados y ventiladores de transporte o con equipo dispuesto para asistencia en caso de catástrofes).

La instalación sanitaria debería tener un plan de emergencia bien documentado para indicar las acciones apropiadas que deberían emprenderse cuando se cambia la fuente de suministro, para garantizar que no existe riesgo para el paciente.

La decisión de utilizar oxígeno 93 y/o una mezcla de oxígeno y oxígeno 93 está fuera del campo de aplicación de esta norma internacional, y la debería tomar la instalación sanitaria de acuerdo con la reglamentación regional o nacional, teniendo en cuenta además, los datos clínicos pertinentes y las consideraciones disponibles, para tratar a todos los pacientes en tal instalación sanitaria a la par que se mantiene la seguridad del paciente al más alto nivel.

## **Anexo K (Informativo)**

### **Fabricación de gases medicinales en la instalación; responsabilidad de la calidad del gas medicinal**

#### **K.1 Responsabilidades de la calidad del gas medicinal**

Los gases medicinales se suministran como un producto terminado a la instalación sanitaria o se fabrican en la propia instalación sanitaria.

La responsabilidad de la calidad del gas medicinal utilizado en la instalación sanitaria se debería asignar a una persona designada dentro de la instalación sanitaria, normalmente el director farmacéutico (o función equivalente). La persona responsable debería tener un conocimiento adecuado de los gases que se utilizan y debería efectuar auditorías de los sistemas a intervalos apropiados para garantizar que los gases que se están suministrando no afectarán adversamente a la seguridad del paciente. Cuando los gases medicinales se suministran a la instalación sanitaria, el responsable de la calidad de los gases es el fabricante o el proveedor, dependiendo de lo estipulado en la reglamentación nacional, regional o local.

Típicamente, será preciso que el proveedor sea el titular de una licencia/autorización de comercialización del producto que será emitida por la autoridad competente nacional.

Para obtener la licencia apropiada para el gas, se requiere que el fabricante demuestre que tiene implantado un sistema de gestión de la calidad apropiado que demostrará que los gases medicinales han sido fabricados de acuerdo con las normas de correcta fabricación, en una instalación que está registrada con la aprobación de la autoridad reglamentaria.

Cuando los gases medicinales los suministra una tercera parte, las responsabilidades de la instalación sanitaria se limitan a la gestión del sistema de canalización de gases medicinales para garantizar que no compromete la calidad del(de los) gas(es) medicinal(es). Se deberían establecer procedimientos documentados para garantizar que las personas que hacen funcionar, y que mantienen y utilizan el sistema de canalización de gases medicinales están apropiadamente informadas de los procedimientos correctos de trabajo.

Además de garantizar que el producto cumple la especificación, el proveedor del gas medicinal es responsable de la gestión para subsanar cualquier defecto comunicado por el cliente y de notificar cualquier episodio adverso a la autoridad reglamentaria nacional como parte del sistema de farmacovigilancia. La instalación sanitaria es responsable de notificar cualquier episodio adverso o de comunicar cualquier defecto de la calidad del producto al proveedor.

Cuando los gases medicinales se fabrican en la propia instalación, la instalación sanitaria es responsable de la seguridad, de la calidad y de la eficacia de los gases medicinales fabricados.

#### **K.2 Fabricación en la propia instalación**

##### **K.2.1 Generalidades**

Los gases medicinales que se pueden fabricar en una instalación incluyen:

- oxígeno 93 fabricado utilizando concentradores de oxígeno;
- aire para uso médico fabricado utilizando compresores;
- aire para uso médico fabricado utilizando un sistema mezclador;
- aire motriz para instrumentos quirúrgicos fabricado utilizando compresores.

### **K.2.2 Equipo**

Cuando los gases medicinales se fabrican en la propia instalación, el equipo utilizado para la fabricación debería estar apropiadamente certificado para demostrar que es adecuado para su fin previsto.

Dentro de la UE, la aprobación apropiada de la planta de fabricación es que debería tener la marca CE, en cuya aprobación haya participado un organismo notificado de acuerdo con lo establecido en la directiva de productos sanitarios 93/42/CEE.

### **K.3 Sistema de gestión de la calidad**

Cuando los gases medicinales se fabrican en la propia instalación, la instalación sanitaria debería establecer un sistema de gestión de la calidad para garantizar que se mantienen la seguridad, la calidad y la eficacia del suministro del gas medicinal.

El sistema de gestión de la calidad se debería establecer de forma que responda a los principios de las normas de correcta fabricación.

### **K.4 Responsabilidades**

La instalación sanitaria debería asignar responsabilidades a un número de personas designadas en la propia instalación, que incluyan:

- una persona responsable de la fabricación de los gases medicinales;
- una persona responsable del control de la calidad de los gases medicinales.

Estas funciones las deberían desempeñar personas que sean independientes entre sí. Las personas responsables pueden formalmente asignar sus responsabilidades a sustitutos designados para garantizar que la persona responsable está disponible cuando así se requiera.

#### **K.4.1 Responsabilidad de la fabricación**

La persona responsable de la fabricación de los gases medicinales producidos en la propia instalación debería:

- garantizar que los gases medicinales se fabrican de acuerdo con las instrucciones de uso proporcionadas por los proveedores del equipo y con cualquier otra documentación apropiada para obtener la seguridad, la calidad y la eficacia requeridas.
- aprobar cualquier instrucción para la fabricación y garantizar su implementación mediante la formación y la auditoría;
- garantizar que los registros de fabricación se generan y evalúan de forma sistemática;
- garantizar que el mantenimiento del equipo se efectúa de acuerdo con el plan de mantenimiento;
- aprobar a cualquier contratista empleado para mantener/ reparar cualquier equipo de fabricación;
- garantizar que la planta de fabricación se somete a un plan de validación apropiado.

#### **K.4.2 Responsabilidad del control de la calidad**

La persona responsable del control de calidad de los gases medicinales producidos en la propia instalación debería:

- aprobar (o rechazar) los gases medicinales fabricados en la propia instalación;
- revisar los registros del control de la calidad generados para garantizar que el producto que se está suministrando para su utilización en la propia instalación cumple la especificación;
- garantizar que se efectúan todos los ensayos de la calidad necesarios;
- aprobar los procedimientos de ensayo y la frecuencia con que se realizan, basándose en la gestión del riesgo;
- verificar el mantenimiento del equipo de fabricación;
- garantizar que el equipo de fabricación se somete a un plan de validación apropiado;
- garantizar que el personal que efectúa cualquier función de fabricación o de control de la calidad recibe la formación apropiada y que se documentan los programas de formación.

### **K.5 Control de la calidad**

#### **K.5.1 Ensayos en línea**

Dado que en la producción de los gases medicinales fabricados en la propia instalación se utiliza equipo automatizado con analizadores en línea, un requisito importante es garantizar que el equipo de análisis se mantiene y calibra de forma que se cumplen los requisitos de la calidad. Cualquier desviación de los niveles de la calidad definidos debería generar una alarma y la intervención de equipo de control para impedir que producto que no cumple la especificación sea suministrado para uso medicinal.

#### **K.5.2 Continuidad del suministro**

El sistema de gestión de la calidad debería contemplar también los requisitos que garantizan que exista siempre un suministro de gas medicinal disponible para ser utilizado a un nivel de la calidad apropiado.

#### **K.5.3 Fuente de suministro secundaria y de reserva**

Cuando la planta se utiliza para el llenado de depósitos de alta presión para ser utilizados como una fuente de suministro secundaria o de reserva permanentemente instalada, el proceso de llenado debería estar cubierto también por los principios de las normas de correcta fabricación y por el sistema de gestión de la calidad. Puede ser necesario también cumplir la legislación adicional de sistemas presurizados para demostrar que el(los) depósito(s) de alta presión es (son) adecuado(s) para ser llenado(s) y que no está(n) sometido(s) a condiciones fuera de las contempladas en su diseño.



## Bibliografía

- [1] ISO 32:1977, *Gas cylinders for medical use. Marking for identification of content.*
- [2] ISO 407:2004, *Small medical gas cylinders. Pin-index yoke-type valve connections.*
- [3] ISO 3746:2010, *Acoustics. Determination of sound power levels and sound energy levels of noise sources using sound pressure. Survey method using an enveloping measurement surface over a reflecting plane.*
- [4] ISO 4126-1, *Safety devices for protection against excessive pressure. Part 1: Safety valves.*
- [5] ISO 4135, *Anaesthetic and respiratory equipment. Vocabulary.*
- [6] ISO 5145:2014, *Cylinder valve outlets for gases and gas mixtures. Selection and dimensioning.*
- [7] ISO 7183, *Compressed-air dryers. Specifications and testing.*
- [8] ISO 7396-2, *Medical gas pipeline systems. Part 2: Anaesthetic gas scavenging disposal systems.*
- [9] ISO/TR 7470, *Valve outlets for gas cylinders. List of provisions which are either standardized or in use.*
- [10] ISO 8359:1996, *Oxygen concentrators for medical use. Safety requirements.*
- [11] ISO 8573-2, *Compressed air. Part 2: Test methods for oil aerosol content.*
- [12] ISO 8573-3, *Compressed air. Part 3: Test methods for measurement of humidity.*
- [13] ISO 8573-4, *Compressed air. Part 4: Test methods for solid particle content.*
- [14] ISO 8573-5, *Compressed air. Part 5: Test methods for oil vapour and organic solvent content.*
- [15] ISO 8573-6, *Compressed air. Part 6: Test methods for gaseous contaminant content.*
- [16] ISO 8573-8, *Compressed air. Part 8: Test methods for solid particle content by mass concentration.*
- [17] ISO 9001:2015, *Quality management systems. Requirements.*
- [18] ISO 10083:2006, *Oxygen concentrator supply systems for use with medical gas pipeline systems.*
- [19] ISO 10524-4, *Pressure regulators for use with medical gases. Part 4: Low-pressure regulators.*
- [20] ISO 13485:2003, *Medical devices. Quality management systems. Requirements for regulatory purposes.*
- [21] ISO/TR 16142, *Medical devices. Guidance on the selection of standards in support of recognized essential principles of safety and performance of medical devices.*
- [22] AS 2896-1998, *Medical gas systems. Installation and testing of non-flammable medical gas pipeline systems.*
- [23] ASTM F1464, *Oxygen concentrators for domiciliary use.*
- [24] CAN/CSA-Z305.6-92, *Medical oxygen concentrator central supply system: for use with nonflammable medical gas piping systems.*

- [25] CGA E-10-2001, *Maintenance of medical gas and vacuum systems in healthcare facilities.*
- [26] CGA P-8.1-1995, *Safe installation and operation of PSA and membrane oxygen and nitrogen generators.*
- [27] EN 475, *Medical devices. Electrically-generated alarm signals.*
- [28] EN 12021, *Respiratory protective devices. Compressed air for breathing apparatus.*
- [29] ISO 13585:2012 *Specifies basic requirements for the qualification testing of brazers and brazing operators providing conditions for brazing, testing, examination, acceptance criteria and range of qualification for certificates. Replaces EN 13133.*
- [30] EN 14931, *Pressure vessels for human occupancy (PVHO). Multi-place pressure chamber systems for hyperbaric therapy. Performance, safety requirements and testing.*
- [31] EN 15908:2010 *Anaesthetic and respiratory equipment. Non-interchangeable screw-threaded (NIST) low-pressure connectors for medical gases.*
- [32] FD S 90-155, *Systèmes de distribution pour gaz médicaux comprimés et vide. Compléments pour la conception et la réception (“Pipelines for compressed medical gases and vacuum. Additional elements for design and commissioning”).*
- [33] HTM 02/01:2006, *Health Technical Memorandum. Medical gas pipeline systems, Part A: Design, installation, validation and certification.*
- [34] HTM 02/01:2006, *Health Technical Memorandum. Medical gas pipeline systems, Part B: Operational management.*
- [35] Monograph on Medicinal Air. European Pharmacopoeia Commission, 2005.
- [36] Monograph on Synthetic Medicinal Air. European Pharmacopoeia Commission, 2005.
- [37] NFPA 99, *Health Care Facilities.*
- [38] SIS/HB 370, *Säkerhetsnorm för medicinska gasanläggningar.*
- [39] EASY W.R., DOUGLAS G.A., MERRIFIELD A.J. A combined oxygen concentrator and compressed air unit. Assessment of a prototype and discussion of its potential applications. *Anaesthesia.* 1988, **43** pp. 37–41.
- [40] FRIESEN R.M. Oxygen concentrators and the practice of anaesthesia. *Can. J. Anaesth.* 1992, **39** pp. R80–R84.
- [41] HOWELL R.S.C. Oxygen concentrators. *Br. J. Hosp. Med.* 1985, 34 pp. 221–223.
- [42] SWAN B.B. Oxygen concentrators. *Can. J. Anaesth.* 1987, 34 pp. 538–539.
- [43] FRIESEN R.M., RABER M.B., REIMER D.H. Oxygen concentrators: a primary oxygen supply source. *Can. J. Anaesth.* 1999, **46** pp. 1185–1190.
- [44] PARKER C.J., SNOWDEN S.L. Predicted and measured oxygen concentrations in the circle system using low fresh gas flows with oxygen supplied by an oxygen concentrator. *Br. J. Anaesth.* 1988, **61** pp. 397–402.
- [45] 2001/83/EC, *Manufacturer and importation of medicinal products for human use.*
- [46] 91/356/EEC, *Principles and guidelines of good manufacturing practice for medicinal products for human use.*
- [47] USP XXII, *The United States Pharmacopoeia*, 1990.

- [48] CM/RESAP. (2011)1 on quality and safety assurance requirements for medicinal products prepared in pharmacies for the special needs of patients (EU Committee of Ministers, January 19, 2011, adopted following 1103rd meeting).
- [49] ASSE 6000, *Professional Qualifications Standard for Medical Gas Systems Personnel*.
- [50] CSA B-51, *Coiler, pressure vessel, and pressure piping code*.
- [51] EN 13134, *Brazing. Procedure approval*.
- [52] CSA Z7396.1-12, *Medical gas pipeoine systems. Part 1: Pipelines for medical gases, medical vacuum, medical support gases and anaesthetic gas scavenging systems*.
- [53] IEC 60601-1-2, *Medical electrical equipment. Part 1-2: General requirements for basic safety and essential performance. Collateral Standard: Electromagnetic disturbances. Requirements and tests*.
- [54] ISO 11114-1, *Gas cylinders. Compatibility of cylinder and valve materials with gas contents. Part 1: Metallic materials*.
- [55] ISO 11114-2, *Gas cylinders. Compatibility of cylinder and valve materials with gas contents. Part 2: Non-metallic materials*.

## Anexo ZA (Informativo)

### Capítulos de esta norma europea relacionados con los requisitos esenciales u otras disposiciones de la Directiva 93/42/CEE

Esta norma europea ha sido elaborada bajo un Mandato dirigido a CEN por la Comisión Europea y por la Asociación Europea de Libre Comercio, para proporcionar un medio de dar cumplimiento a los requisitos esenciales de la Directiva 93/42/CEE.

Una vez que esta norma se cite en el Diario Oficial de la Unión Europea bajo esta directiva, y se implemente como norma nacional en al menos un Estado Miembro, el cumplimiento de los capítulos de esta norma indicados en la tabla ZA.1, dentro de los límites del campo de aplicación de esta norma, es un medio para dar presunción de conformidad con los requisitos esenciales específicos de esta directiva y los reglamentos de la AELC asociados.

**Tabla ZA.1 – Correspondencia entre esta norma europea y la Directiva 93/42/CEE**

| Capítulo(s)/Apartado(s)<br>de esta norma europea | Requisitos esenciales de la<br>Directiva 93/42/CEE | Notas/Comentarios |
|--------------------------------------------------|----------------------------------------------------|-------------------|
| 4                                                | 1, 2, 7.1, 7.3                                     |                   |
| 4.3.2                                            | 9.3                                                |                   |
| 4.3.3                                            | 7.1                                                |                   |
| 4.3.4                                            | 9.2, 9.3, 12.7.1                                   |                   |
| 4.3.5                                            | 9.3                                                |                   |
| 4.3.6                                            | 7.1, 9.3, 12.7.1                                   |                   |
| 4.3.7                                            | 7.2, 7.6                                           |                   |
| 4.3.8                                            | 9.2                                                |                   |
| 4.4.1                                            | 2, 3                                               |                   |
| 4.4.2                                            | 1, 2, 3, 4                                         |                   |
| 5.1 a 5.2.9                                      | 1, 2, 3, 4, 7.6, 12.8.1, 12.8.2                    |                   |
| 5.3.1 a 5.3.3                                    | 2, 3, 7.6                                          |                   |
| 5.3.4                                            | 7, 12.7.1                                          |                   |
| 5.3.5                                            | 7, 12.7.1                                          |                   |
| 5.3.6                                            | 7.1, 9.3                                           |                   |
| 5.3.7                                            | 2, 3                                               |                   |
| 5.4                                              | 3                                                  |                   |
| 5.5.1                                            | 3, 12.8                                            |                   |
| 5.5.2.1 a 5.5.2.11                               | 3, 7.2, 12.8                                       |                   |

| Capítulo(s)/Apartado(s)<br>de esta norma europea | Requisitos esenciales de la<br>Directiva 93/42/CEE | Notas/Comentarios |
|--------------------------------------------------|----------------------------------------------------|-------------------|
| 5.5.2.12                                         | 7.6                                                |                   |
| 5.5.2.13                                         | 3, 9.2                                             |                   |
| 5.5.2.14                                         | 12.7.2                                             |                   |
| 5.5.2.15                                         | 3, 7.2                                             |                   |
| 5.5.3                                            | 3, 7.2, 7.6, 12.8                                  |                   |
| 5.6                                              | 2, 3, 7.2, 7.3, 7.6, 9.3, 12.8                     |                   |
| 5.7.1 a 5.7.7                                    | 3, 8.1, 12.8.1                                     |                   |
| 5.7.8 a 5.7.9                                    | 7.6, 8.1                                           |                   |
| 5.7.10                                           | 12.7.2                                             |                   |
| 5.7.11                                           | 7.2                                                |                   |
| 5.7.12                                           | 3, 7.2, 7.6                                        |                   |
| 5.7.13                                           | 3, 9.3                                             |                   |
| 5.7.14                                           | 3, 9.3                                             |                   |
| 5.7.15                                           | 3, 12.8                                            |                   |
| 5.8 a 5.10                                       | 2, 3                                               |                   |
| 6                                                | 1, 2, 3, 4, 12.3, 12.8.1, 12.8.2, 12.9             |                   |
| 7                                                | 1, 2, 3                                            |                   |
| 7.1                                              | 9.3, 12.7.1                                        |                   |
| 7.2.1 a 7.2.4                                    | 2, 3                                               |                   |
| 7.2.5                                            | 9.2                                                |                   |
| 7.2.6                                            | 9.2                                                |                   |
| 7.3                                              | 2,3,4                                              |                   |
| 7.4                                              | 2, 3, 12.8                                         |                   |
| 8                                                | 1, 2                                               |                   |
| 9                                                | 9.1, 12.7.4, 13.6 c)                               |                   |
| 9.3                                              | 9.2, 12.5, 12.6                                    |                   |
| 10                                               | 13.2                                               |                   |
| 11                                               | 1, 2, 3, 4, 9                                      |                   |
| 11.1.5                                           | 12.6                                               |                   |
| 12.1 a 12.4                                      | 1, 2, 3                                            |                   |
| 12.5.1                                           | 9.3, 12.7.1, 9.2                                   |                   |

| Capítulo(s)/Apartado(s)<br>de esta norma europea | Requisitos esenciales de la<br>Directiva 93/42/CEE                                          | Notas/Comentarios |
|--------------------------------------------------|---------------------------------------------------------------------------------------------|-------------------|
| 12.5.2                                           | 7.5, 9.3, 12.7.1, 9.2                                                                       |                   |
| 12.6.1                                           | 7.5, 12.7.1                                                                                 |                   |
| 12.6.2 a 12.6.9                                  | 2, 3, 7.5, 12.8                                                                             |                   |
| 12.6.10                                          | 7.2                                                                                         |                   |
| 12.6.11                                          | 7.2                                                                                         |                   |
| 12.6.12                                          | 7.2                                                                                         |                   |
| 12.6.13                                          | 7.2                                                                                         |                   |
| 12.6.14                                          | 7.2                                                                                         |                   |
| 12.6.15 a 12.6.16                                | 12.7.4, 12.8.1                                                                              |                   |
| 13                                               | 4, 13.1, 13.3, 13.6 c), 13.6 d), 13.6 e),<br>13.6 k), 13.6 l), 13.6 m), 13.6 n),<br>13.6 q) |                   |

**ADVERTENCIA:** Los productos incluidos en el campo de aplicación de esta norma pueden estar afectados por otros requisitos o directivas de la UE.

---

---

**AENOR** Asociación Española de  
Normalización y Certificación

Génova, 6  
28004 MADRID-España

[info@aenor.es](mailto:info@aenor.es)  
[www.aenor.es](http://www.aenor.es)

Tel.: 902 102 201  
Fax: 913 104 032

Noviembre 2007

### TÍTULO

**Sistemas de canalización de gases medicinales**

**Parte 2: Sistemas finales de evacuación de gases anestésicos**

(ISO 7396-2:2007)

*Medical gas pipeline systems. Part 2: Anaesthetic gas scavenging disposal systems. (ISO 7396-2:2007)*

*Réseaux de distribution de gaz médicaux. Partie 2: Réseaux d'évacuation de gaz d'anesthésie non réutilisables. (ISO 7396-2:2007)*

### CORRESPONDENCIA

Esta norma es la versión oficial, en español, de la Norma Europea EN ISO 7396-2:2007, que a su vez adopta la Norma Internacional ISO 7396-2:2007.

### OBSERVACIONES

Esta norma anulará y sustituirá a las Normas UNE-EN 737-2:1998, UNE-EN 737-2/A1:2001, antes de 2009-05-01.

### ANTECEDENTES

Esta norma ha sido elaborada por el comité técnico AEN/CTN 110 *Material de Anestesia y Reanimación Respiratoria* cuya Secretaría desempeña FENIN.





Versión en español

**Sistemas de canalización de gases medicinales**  
**Parte 2: Sistemas finales de evacuación de gases anestésicos**  
**(ISO 7396-2:2007)**

**Medical gas pipeline systems. Part 2:  
Anaesthetic gas scavenging disposal  
systems.**  
**(ISO 7396-2:2007)**

**Réseaux de distribution de gaz médicaux.  
Partie 2: Réseaux d'évacuation de gaz  
d'anesthésie non réutilisables.**  
**(ISO 7396-2:2007)**

**Rohrleitungssysteme für medizinische  
Gase. Teil 2: Entsorgungssysteme von  
Anästhesiegas-Fortleitungssystemen.**  
**(ISO 7396-2:2007)**

Esta norma europea ha sido aprobada por CEN el 2007-03-15.

Los miembros de CEN están sometidos al Reglamento Interior de CEN/CENELEC que define las condiciones dentro de las cuales debe adoptarse, sin modificación, la norma europea como norma nacional. Las correspondientes listas actualizadas y las referencias bibliográficas relativas a estas normas nacionales pueden obtenerse en el Centro de Gestión de CEN, o a través de sus miembros.

Esta norma europea existe en tres versiones oficiales (alemán, francés e inglés). Una versión en otra lengua realizada bajo la responsabilidad de un miembro de CEN en su idioma nacional, y notificada al Centro de Gestión, tiene el mismo rango que aquéllas.

Los miembros de CEN son los organismos nacionales de normalización de los países siguientes: Alemania, Austria, Bélgica, Bulgaria, Chipre, Dinamarca, Eslovaquia, Eslovenia, España, Estonia, Finlandia, Francia, Grecia, Hungría, Irlanda, Islandia, Italia, Letonia, Lituania, Luxemburgo, Malta, Noruega, Países Bajos, Polonia, Portugal, Reino Unido, República Checa, Rumanía, Suecia y Suiza.

**CEN**  
**COMITÉ EUROPEO DE NORMALIZACIÓN**  
European Committee for Standardization  
Comité Européen de Normalisation  
Europäisches Komitee für Normung  
**CENTRO DE GESTIÓN: Rue de Stassart, 36 B-1050 Bruxelles**

## PRÓLOGO

El texto de la Norma EN ISO 7396-2:2007 ha sido elaborado por el Comité Técnico CEN/TC 215 *Equipos respiratorios y anestésicos*, cuya Secretaría desempeña BSI, en colaboración con el Comité Técnico ISO/TC 121 *Equipos de anestesia y reanimación respiratoria*.

Esta norma europea debe recibir el rango de norma nacional mediante la publicación de un texto idéntico a ella o mediante ratificación antes de finales de octubre de 2007, y todas las normas nacionales técnicamente divergentes deben anularse antes de finales de abril de 2009.

Esta norma europea anula y sustituye a la Norma EN 737-2:1998.

Esta norma europea ha sido elaborada bajo un Mandato dirigido a CEN por la Comisión Europea y por la Asociación Europea de Libre Comercio, y sirve de apoyo a los requisitos esenciales de las Directivas europeas.

La relación con las Directivas UE se recoge en el anexo informativo ZA, que forma parte integrante de esta norma.

De acuerdo con el Reglamento Interior de CEN/CENELEC, están obligados a adoptar esta norma europea los organismos de normalización de los siguientes países: Alemania, Austria, Bélgica, Bulgaria, Chipre, Dinamarca, Eslovaquia, Eslovenia, España, Estonia, Finlandia, Francia, Grecia, Hungría, Irlanda, Islandia, Italia, Letonia, Lituania, Luxemburgo, Malta, Noruega, Países Bajos, Polonia, Portugal, Reino Unido, República Checa, Rumanía, Suecia y Suiza.

ÍNDICE

|                                                                                                              | Página |
|--------------------------------------------------------------------------------------------------------------|--------|
| <b>PRÓLOGO</b> .....                                                                                         | 7      |
| <b>INTRODUCCIÓN</b> .....                                                                                    | 8      |
| <b>1 OBJETO Y CAMPO DE APLICACIÓN</b> .....                                                                  | 9      |
| <b>2 NORMAS PARA CONSULTA</b> .....                                                                          | 9      |
| <b>3 TÉRMINOS Y DEFINICIONES</b> .....                                                                       | 10     |
| <b>4 REQUISITOS GENERALES</b> .....                                                                          | 14     |
| 4.1 Seguridad .....                                                                                          | 14     |
| 4.2 Construcción alternativa .....                                                                           | 14     |
| 4.3 Materiales .....                                                                                         | 14     |
| 4.4 Continuidad del funcionamiento.....                                                                      | 15     |
| <b>5 DISPOSITIVO DE POTENCIA</b> .....                                                                       | 16     |
| <b>6 SISTEMAS INDICADORES</b> .....                                                                          | 17     |
| <b>7 CANALIZACIONES, ENSAMBLADOS DE CONEXIÓN<br/>Y MANGUERAS DE ELIMINACIÓN</b> .....                        | 17     |
| <b>8 CARACTERÍSTICAS DEL SISTEMA DE ELIMINACIÓN Y MÉTODOS<br/>DE ENSAYO DE LA PRESIÓN Y DEL CAUDAL</b> ..... | 19     |
| 8.1 Requisitos.....                                                                                          | 19     |
| 8.2 Métodos de ensayo de la presión y del caudal.....                                                        | 19     |
| 8.3 Medio de impedir el reflejo .....                                                                        | 21     |
| <b>9 UNIDADES TERMINALES</b> .....                                                                           | 22     |
| <b>10 MARCADO Y CÓDIGO DE COLOR</b> .....                                                                    | 22     |
| 10.1 Marcado .....                                                                                           | 22     |
| 10.2 Código de color .....                                                                                   | 22     |
| 10.3 Ensayo de indelebilidad .....                                                                           | 22     |
| <b>11 INSTALACIÓN DE LA CANALIZACIÓN</b> .....                                                               | 22     |
| <b>12 ENSAYOS, PUESTA EN SERVICIO Y CERTIFICACIÓN</b> .....                                                  | 24     |
| 12.1 Generalidades .....                                                                                     | 24     |
| 12.2 Requisitos generales para los ensayos .....                                                             | 24     |
| 12.3 Ensayos, inspecciones y comprobaciones .....                                                            | 25     |
| 12.4 Requisitos de los ensayos, inspecciones y comprobaciones enumerados<br>en el apartado 12.3 .....        | 25     |
| 12.5 Certificación del sistema.....                                                                          | 26     |
| 12.6 Ampliaciones o modificaciones .....                                                                     | 26     |

|                              |                                                                                                                                                 |           |
|------------------------------|-------------------------------------------------------------------------------------------------------------------------------------------------|-----------|
| <b>13</b>                    | <b>INFORMACIÓN A SUMINISTRAR POR EL FABRICANTE.....</b>                                                                                         | <b>26</b> |
| <b>13.1</b>                  | <b>Generalidades.....</b>                                                                                                                       | <b>26</b> |
| <b>13.2</b>                  | <b>Instrucciones de uso.....</b>                                                                                                                | <b>26</b> |
| <b>13.3</b>                  | <b>Información de la gestión operacional.....</b>                                                                                               | <b>27</b> |
| <b>13.4</b>                  | <b>Dibujos "tal cual está instalado".....</b>                                                                                                   | <b>27</b> |
| <b>13.5</b>                  | <b>Diagramas eléctricos.....</b>                                                                                                                | <b>27</b> |
| <b>ANEXO A (Informativo)</b> | <b>RECOMENDACIONES PARA LOS DISPOSITIVOS<br/>DE POTENCIA CONSTITUIDOS POR<br/>VENTILADORES, SOPLADORES O<br/>BOMBAS DE VACÍO DEDICADAS.....</b> | <b>28</b> |
| <b>ANEXO B (Informativo)</b> | <b>EJEMPLO DEL PROCEDIMIENTO PARA LOS ENSAYOS<br/>Y LA PUESTA EN SERVICIO.....</b>                                                              | <b>29</b> |
| <b>ANEXO C (Informativo)</b> | <b>IMPRESOS TÍPICOS DE CERTIFICACIÓN DE LOS<br/>SISTEMAS DE ELIMINACIÓN DE GAE.....</b>                                                         | <b>32</b> |
| <b>ANEXO D (Informativo)</b> | <b>LISTA DE COMPROBACIÓN DE LA GESTIÓN<br/>DE RIESGOS.....</b>                                                                                  | <b>45</b> |
| <b>ANEXO E (Informativo)</b> | <b>JUSTIFICACIÓN.....</b>                                                                                                                       | <b>53</b> |
|                              | <b>BIBLIOGRAFÍA.....</b>                                                                                                                        | <b>54</b> |

## PRÓLOGO

ISO (la Organización Internacional de Normalización) es una federación mundial de organismos nacionales de normalización (organismos miembros de ISO). El trabajo de preparación de las normas internacionales normalmente se realiza a través de los comités técnicos de ISO. Cada organismo miembro interesado en una materia para la cual se haya establecido un comité técnico, tiene el derecho de estar representado en dicho comité. Las organizaciones internacionales, públicas y privadas, en coordinación con ISO, también participan en el trabajo. ISO colabora estrechamente con la Comisión Electrotécnica Internacional (IEC) en todas las materias de normalización electrotécnica.

Las normas internacionales se redactan de acuerdo con las reglas establecidas en la Parte 2 de las Directivas ISO/IEC.

La tarea principal de los comités técnicos es preparar normas internacionales. Los proyectos de normas internacionales adoptados por los comités técnicos se envían a los organismos miembros para su votación. La publicación como norma internacional requiere la aprobación por al menos el 75% de los organismos miembros con derecho a voto.

Se llama la atención sobre la posibilidad de que algunos de los elementos de esta norma internacional puedan estar sujetos a derechos de patente. ISO no asume la responsabilidad por la identificación de cualquiera o todos los derechos de patente.

La Norma Internacional ISO 7396-2 fue preparada por el Comité Técnico CEN/TC 215 del Comité Europeo de Normalización (CEN), *Equipos respiratorios y anestésicos*, en colaboración con el Comité Técnico ISO/TC 121 *Equipos de anestesia y reanimación respiratoria*, Subcomité SC6, *Sistemas de gases médicos*, de conformidad con el Acuerdo de cooperación técnica entre ISO y CEN (Acuerdo de Viena).

Esta segunda edición anula y sustituye a la primera edición (ISO 7396-2:2000), la cual ha sido revisada técnicamente.

La Norma Internacional ISO 7396 consta de las siguientes partes, bajo el título general de *Sistemas de canalización de gases medicinales*:

- *Parte 1: Sistemas de canalización para gases medicinales comprimidos y de vacío.*
- *Parte 2: Sistemas finales de evacuación de gases anestésicos.*

## INTRODUCCIÓN

Los sistemas de evacuación de gases anestésicos (SEGA) se utilizan para reducir la exposición ocupacional a los gases y vapores anestésicos.

El sistema de evacuación de gases anestésicos comprende tres partes principales:

- un sistema de transferencia,
- un sistema colector, y
- un sistema de eliminación.

En la figura 1 se muestra un diagrama esquemático de los sistemas de evacuación de gases anestésicos típicos. Los requisitos para los sistemas colectores y los sistemas de transferencia se especifican en la Norma Internacional ISO 8835-3. Las conexiones de tipo específico para las unidades terminales se especifican en la Norma Internacional ISO 9170-2. En esta parte de la Norma Internacional ISO 7396, se dan las especificaciones y los procedimientos de ensayo para asegurar la compatibilidad entre los componentes del sistema.

Esta parte de la Norma Internacional ISO 7396 especifica los requisitos para los sistemas de evacuación de gases anestésicos para gases y vapores anestésicos. Está prevista para utilización por aquellas personas implicadas en el diseño, construcción, inspección y operación de las instalaciones sanitarias en donde se tratan a seres humanos. Se recomienda que aquellas personas implicadas en el diseño, fabricación y ensayo del equipo previsto para ser conectado a sistemas de canalización tengan también en cuenta el contenido de esta parte de la Norma Internacional ISO 7396.

Se utilizan componentes específicos para las unidades terminales de evacuación y para otros conectores previstos para utilización por el operador. Además, el sistema se ensaya y se certifica para operar a flujos seguros y sin fugas. Está también previsto para contemplar los aspectos que afectan a la seguridad del paciente.

Los objetivos de esta parte de la Norma Internacional ISO 7396 son asegurar lo siguiente:

- a) evitar las contaminaciones cruzadas entre sistemas de canalización diferentes;
- b) la continuidad del funcionamiento del sistema;
- c) la utilización de materiales adecuados;
- d) la limpieza de los componentes;
- e) la instalación correcta;
- f) la provisión de un (o más de un) sistema indicador;
- g) el marcado correcto del sistema de canalización y de sus componentes;
- h) el ensayo, la puesta en servicio y la certificación;
- i) la gestión operacional correcta.

El anexo E contiene las declaraciones de justificación para algunos de los requisitos de esta parte de la Norma Internacional ISO 7396. Se incluye para proporcionar una percepción adicional sobre el razonamiento que condujo a los requisitos y a las recomendaciones que se han incorporado en esta parte de la Norma Internacional ISO 7396. Los capítulos y apartados marcados con asterisco (\*) después de su número tienen una justificación correspondiente en el anexo E.

## 1 OBJETO Y CAMPO DE APLICACIÓN

Esta parte de la Norma Internacional ISO 7396 especifica los requisitos para el diseño, la instalación, el funcionamiento, las prestaciones, la documentación, los ensayos y la puesta en servicio de los sistemas de eliminación de gases anestésicos evacuados para asegurar la seguridad del paciente y para minimizar la exposición del operador y de otras personas a los gases y vapores anestésicos. Incluye los requisitos para el dispositivo de potencia, para el sistema de canalización, para las prestaciones, para la no intercambiabilidad entre los componentes clave y para evitar las conexiones cruzadas entre los sistemas de eliminación de gases anestésicos evacuados (GAE) y los sistemas de canalización de gases medicinales y de vacío.

NOTA En esta parte de la Norma Internacional ISO 7396, el término “canalización” se refiere exclusivamente a las canalizaciones que son parte de un sistema de evacuación de gases anestésicos (SEGA).

Esta parte de la Norma Internacional ISO 7396 es aplicable solamente a aquellos sistemas de eliminación previstos para ser conectados a través de las unidades terminales del SEGA conformes con la Norma Internacional ISO 9170-2 y a los sistemas colectores del SEGA conformes con la Norma Internacional ISO 8835-3.

Esta parte de la Norma Internacional ISO 7396 se aplica también a:

- las ampliaciones de los sistemas de eliminación del SEGA;
- las modificaciones de los sistemas de eliminación del SEGA;
- las modificaciones o sustitución de los dispositivos de potencia.

## 2 NORMAS PARA CONSULTA

Las normas que a continuación se indican son indispensables para la aplicación de esta norma. Para las referencias con fecha, sólo se aplica la edición citada. Para las referencias sin fecha se aplica la última edición de la norma (incluyendo cualquier modificación de ésta).

ISO 5359 *Latiguillos de baja presión para utilización con gases medicinales.*

ISO 7396-1:2007 *Sistemas de canalización de gases medicinales. Parte 1: Sistemas de canalización para gases medicinales comprimidos y de vacío.*

ISO 8835-3:–<sup>1)</sup> *Sistemas de anestesia por inhalación. Parte 3: Sistemas de transferencia y recepción de sistemas de evacuación de gases anestésicos.*

ISO 9170-2 *Sistemas de distribución canalizada de gases medicinales. Parte 2: Unidades terminales de evacuación de gases anestésicos.*

ISO 14971 *Productos sanitarios. Aplicación de la gestión de riesgos a los productos sanitarios.*

ISO 15001 *Equipo respiratorio y de anestesia. Compatibilidad con oxígeno.*

EN 1041 *Información proporcionada por el fabricante con los productos sanitarios.*

EN 13348 *Cobre y aleaciones de cobre. Tubos redondos de cobre, sin soldadura, para gases medicinales o vacío.*

---

1) Se publicará. (Revisión de la Norma Internacional ISO 8835-3:1997)



### 3 TÉRMINOS Y DEFINICIONES

Para los fines de esta norma se aplican los términos y definiciones siguientes:

#### 3.1 casquillo de SEGA:

Parte hembra de una unidad terminal que está integrada o fijada al bloque base por una interfaz selectiva del tipo de unidad terminal, y que contiene un punto de conexión selectivo del tipo de unidad terminal.

#### 3.2 unidad terminal de SEGA:

Ensamblado de entrada en un SEGA en el cual el operador hace conexiones y desconexiones.

#### 3.3 bloque base de la unidad terminal del SEGA:

Parte de una unidad terminal del SEGA que está conectada al sistema de eliminación de la canalización.

#### 3.4 unidad terminal tipo 1 de SEGA:

Punto de conexión entre el sistema colector y el sistema de eliminación en el cual un operador hace conexiones y desconexiones.

Véase la figura 1.

#### 3.5 unidades terminales tipo 1H del SEGA:

Unidad terminal tipo 1 de SEGA a utilizar en sistemas de eliminación de caudal alto.

#### 3.6 unidades terminales tipo 1L del SEGA:

Unidad terminal tipo 1 de SEGA a utilizar en sistemas de eliminación de caudal bajo.

#### 3.7 unidad terminal tipo 2 del SEGA:

Punto de conexión entre el dispositivo de potencia o la manguera de eliminación y el resto del sistema de eliminación en el cual un operador hace conexiones y desconexiones.

Véase la figura 1.

#### 3.8 selectivo del tipo de SEGA:

Que tiene las características que impiden la intercambiabilidad y por tanto, que permiten la asignación a un tipo de SEGA solamente.

#### 3.9 punto de conexión selectivo del tipo de SEGA:

Parte del casquillo de SEGA que es el receptor para un cabezal selectivo del tipo de SEGA.

#### 3.10 sistema compresor de aire:

Fuente de suministro con compresor(es) diseñada para proporcionar aire medicinal y/o aire para accionamiento de equipos quirúrgicos y/o aire para el SEGA.

NOTA Se utilizan nombres o símbolos diferentes para el aire para accionamiento de equipos quirúrgicos, tales como aire instrumental, aire quirúrgico, aire motriz, aire – 700 y aire – 800.

#### 3.11 sistema de evacuación de gases anestésicos, SEGA:

Sistema completo que se conecta al (a los) orificio(s) de evacuación de un sistema respiratorio o a otro equipo con el fin de transportar los gases y vapores anestésicos espirados y/o en exceso hasta un lugar apropiado de descarga.

NOTA Funcionalmente, un SEGA consta de tres partes diferentes, un sistema de transferencia, un sistema colector y un sistema de eliminación. Estas tres partes funcionalmente diferenciadas pueden existir separadas o combinadas secuencialmente en total o en parte. Además, una o más partes de un SEGA pueden estar combinadas con un sistema respiratorio (por ejemplo, un ventilador anestésico) que incluya el sistema de transferencia, o sistemas de transferencia y colectores.

**3.12 puesta en servicio:**

Demostración del funcionamiento para verificar que la especificación del sistema acordada se cumple y es aceptada por el usuario o su representante.

**3.13 manguera de eliminación:**

Parte de un SEGA que transfiere los gases y vapores anestésicos espirados y/o en exceso desde el dispositivo de potencia hasta el cabezal de una unidad terminal tipo 2 de SEGA.

**3.14 sistema de eliminación:**

Medio por el cual los gases y vapores anestésicos espirados y/o en exceso se transportan desde el sistema colector hasta un lugar apropiado de descarga.

NOTA Un lugar de descarga puede ser, por ejemplo, el exterior de un edificio o un sistema de ventilación de extracción de gases no recirculante.

**3.15 factor de diversificación:**

Factor que representa la proporción máxima de unidades terminales en una zona clínica definida que se utilizarán de forma simultánea con caudales definidos de conformidad con la dirección de la instalación sanitaria.

**3.16 sistema de eliminación de caudal alto:**

Sistema de eliminación que está previsto que funcione con un sistema de transferencia y colector de caudal alto, que cumpla la Norma Internacional ISO 8835-3.

**3.17 sistema de transferencia y colector de caudal alto:**

Sistema de transferencia y colector que cumple la Norma Internacional ISO 8835-3 que se conecta mediante una unidad terminal tipo 1H de SEGA especificada en la Norma Internacional ISO 9170-2 a un sistema de eliminación de caudal alto que cumpla esta parte de la Norma Internacional ISO 7396.

**3.18 sistema de eliminación de caudal bajo:**

Sistema de eliminación que está previsto que funcione con un sistema de transferencia y colector de caudal bajo que cumpla la Norma Internacional ISO 8835-3.

**3.19 sistema de transferencia y colector de caudal bajo:**

Sistema de transferencia y colector que cumple la Norma Internacional ISO 8835-3 que se conecta mediante una unidad terminal tipo 1L de SEGA especificada en la Norma Internacional ISO 9170-2 a un sistema de eliminación de caudal bajo que cumpla esta parte de la Norma Internacional ISO 7396.

**3.20 fabricante:**

La persona física o jurídica responsable del diseño, fabricación, acondicionamiento y etiquetado de un producto sanitario antes de su puesta en el mercado con vistas a la comercialización de éste en su propio nombre, independientemente de que estas operaciones sean efectuadas por esta misma persona o por un tercero por cuenta de aquélla.

**3.21 presión máxima de funcionamiento:**

Presión máxima a la cual está diseñada para funcionar una unidad Terminal.

NOTA La presión de funcionamiento para una unidad terminal tipo 1 es inferior a la atmosférica y para una unidad terminal tipo 2 es superior a la atmosférica.

**3.22 presión máxima de ensayo:**

Presión máxima a la que se ha diseñado se someta una unidad terminal durante los ensayos de presión de la canalización.

**3.23 válvula unidireccional (válvula antirretorno):**

Válvula que permite el flujo solamente en una dirección.

**3.24 dispositivo de potencia:**

Parte de un sistema de eliminación de GAE que proporciona el flujo y la presión para la evacuación.

**3.25 cabezal:**

Componente macho no intercambiable diseñado para ser aceptado por un casquillo y quedar retenido en el mismo.

**3.26 conector rápido:**

Par de componentes selectivos de un tipo que se pueden conectar fácilmente y de forma rápida mediante la acción única de una o ambas manos sin el uso de herramientas.

**3.27 manguera colectora:**

Parte de un SEGA que transfiere los gases y vapores anestésicos y/o el exceso desde el sistema colector al sistema de eliminación.

**3.28 sistema colector:**

Parte de un SEGA que proporciona una interfase entre el sistema de transferencia y el sistema de eliminación.

**3.29 válvula de corte; válvula de aislamiento:**

Válvula que impide el flujo en ambas direcciones cuando se cierra.

**3.30 condición de primer fallo:**

Condición en la que un único medio de protección frente a un peligro para la seguridad del equipo es defectuoso, o en la que está presente una única condición anormal externa.

NOTA El mantenimiento del equipo se considera una condición normal.

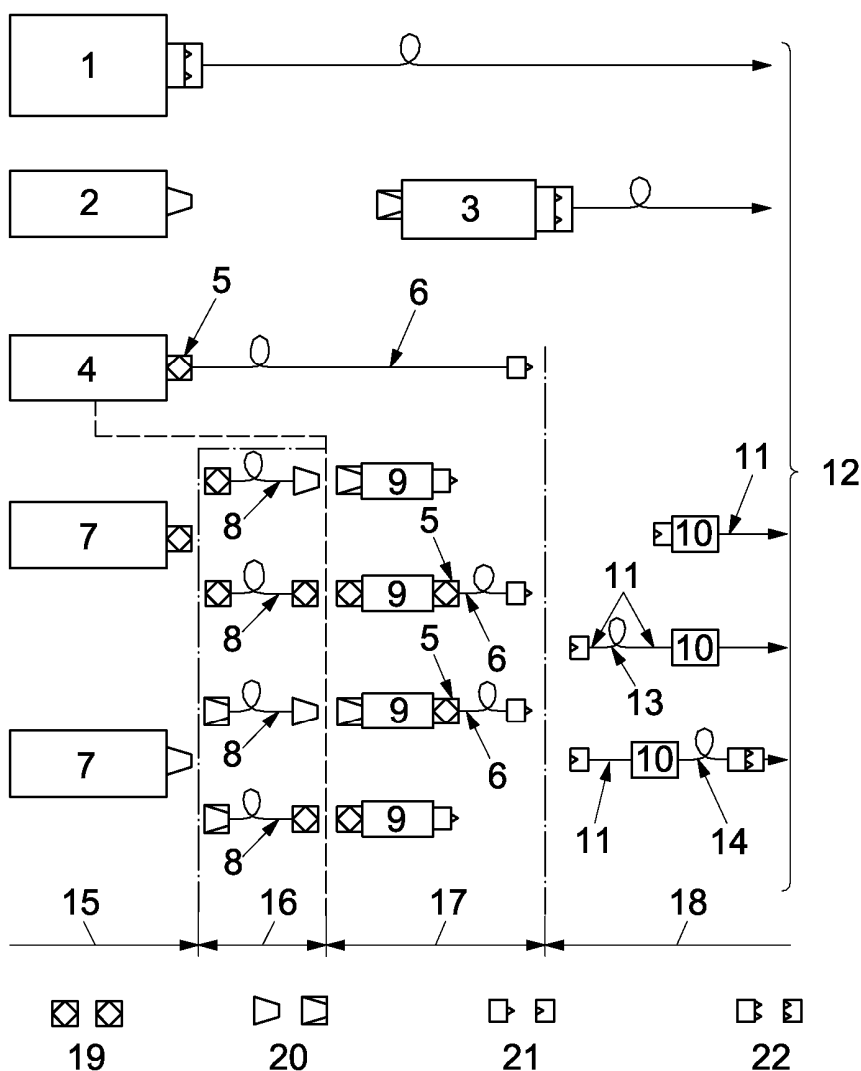

Leyenda

- |    |                                                                                                                                                        |    |                                                             |
|----|--------------------------------------------------------------------------------------------------------------------------------------------------------|----|-------------------------------------------------------------|
| 1  | aparato tal como un sistema respiratorio anestésico o un ventilador anestésico y sistema de transferencia/colector integrado y dispositivo de potencia | 11 | conexión permanente                                         |
| 2  | aparato tal como un sistema respiratorio anestésico o un ventilador anestésico                                                                         | 12 | punto de descarga                                           |
| 3  | sistema de transferencia/colector y dispositivo de potencia                                                                                            | 13 | manguera flexible o suspendida                              |
| 4  | aparato tal como un sistema respiratorio anestésico y sistema de transferencia/colector integrado                                                      | 14 | manguera de eliminación                                     |
| 5  | conector permanente o propio del fabricante                                                                                                            | 15 | límite del sistema respiratorio o del ventilador anestésico |
| 6  | manguera colectora                                                                                                                                     | 16 | límites del sistema de transferencia                        |
| 7  | sistema respiratorio o ventilador anestésico                                                                                                           | 17 | límites del sistema colector                                |
| 8  | tubo de transferencia                                                                                                                                  | 18 | límite del sistema de eliminación                           |
| 9  | sistema colector                                                                                                                                       | 19 | conexión propia del fabricante (funcionalmente selectiva)   |
| 10 | dispositivo de potencia                                                                                                                                | 20 | conexión cónica de 30 mm                                    |
|    |                                                                                                                                                        | 21 | cabezal/casquillo de la unidad terminal tipo 1              |
|    |                                                                                                                                                        | 22 | cabezal/casquillo de la unidad terminal tipo 2              |

NOTA 1 El terminal tipo 1 es para presión negativa. El cabezal/casquillo de la unidad terminal tipo 2 es para presión positiva.

NOTA 2 El límite entre el sistema colector y el sistema de eliminación mostrado no coincide necesariamente con un límite físico real tal como una pared. En el montaje mostrado, una unidad terminal en una pared estaría situada en la entrada del dispositivo de potencia.

**Figura 1 – Diagrama esquemático de las conexiones típicas de un SEG**

**3.31 caudal de diseño del sistema:**

Caudal calculado a partir del flujo máximo requerido por la instalación sanitaria corregido teniendo en cuenta el(los) factor(es) de diversificación.

**3.32 sistema de transferencia:**

Parte de un SEGA que transfiere los gases anestésicos espirados y/o en exceso desde la conexión de evacuación del sistema respiratorio u otro equipo al sistema colector.

**3.33 tubo de transferencia:**

Parte de un SEGA que transfiere los gases anestésicos espirados y/o en exceso desde el sistema respiratorio al sistema colector.

**4 REQUISITOS GENERALES****4.1 Seguridad**

Los sistemas de eliminación de SEGA, cuando se instalan, se amplían, se modifican, se ponen en servicio, se hacen funcionar y se mantienen de conformidad con las instrucciones del fabricante, no deben presentar ningún riesgo que no se reduzca a un nivel aceptable utilizando los procedimientos de gestión de los riesgos conformes con la Norma Internacional ISO 14971 y que derive de su aplicación prevista, tanto en la condición normal de tales sistemas como en su condición de primer fallo.

NOTA 1 Una situación en la que un fallo no se detecta se considera una condición normal. Las condiciones de fallo/situaciones peligrosas pueden permanecer sin detectarse durante cierto tiempo y como consecuencia, pueden conducir a un riesgo inaceptable. En tal caso, una condición de fallo detectada subsiguientemente necesita ser considerada como una condición de primer fallo. Es necesario determinar las medidas de control de los riesgos específicas dentro del proceso de gestión de los riesgos para tratar tales situaciones.

NOTA 2 Los peligros de seguridad típicos (incluyendo la discontinuidad del suministro, la presión y/o caudal incorrectos, etc.) se enumeran en el anexo D.

**4.2 Construcción alternativa**

Los sistemas y los componentes de eliminación de GAE, o partes de los mismos, que utilicen materiales o tengan formas de construcción diferentes a aquéllos especificados en esta parte de la Norma Internacional ISO 7396, se deben aceptar como conformes con los objetivos de seguridad de esta parte de la Norma Internacional ISO 7396 si se puede demostrar que se obtiene un grado de seguridad equivalente (es decir, la conformidad con los requisitos supone que los riesgos se han reducido hasta los niveles aceptables) a menos que se tenga disponible evidencia de lo contrario.

NOTA 1 La evidencia objetiva se puede obtener por la vigilancia de post-comercialización.

El fabricante debe proporcionar la evidencia del grado de seguridad equivalente.

NOTA 2 La normativa regional o nacional puede requerir la provisión de la evidencia a una autoridad competente o a un organismo de evaluación de la conformidad, por ejemplo, a un organismo notificado en el Área Económica Europea cuando así lo solicite.

**4.3 Materiales**

**4.3.1** Los materiales utilizados por las canalizaciones y otros componentes del sistema de eliminación deben ser resistentes a la corrosión y compatibles con los gases y vapores anestésicos en las condiciones de funcionamiento especificadas por el fabricante.

NOTA 1 La resistencia a la corrosión incluye la resistencia contra la influencia de la humedad condensante y los materiales circundantes.

El fabricante debe proporcionar la evidencia.

NOTA 2 La normativa regional o nacional puede requerir la disposición de la evidencia a una autoridad competente o a un organismo de evaluación de la conformidad, por ejemplo, a un organismo notificado en el Área Económica Europea cuando así lo solicite.

**4.3.2** Si se utilizan tubos de cobre, deben cumplir los requisitos dados en la Norma Europea EN 13348.

El fabricante debe proporcionar la evidencia.

NOTA 1 La normativa regional o nacional puede requerir la disposición de la evidencia a una autoridad competente o a un organismo de evaluación de la conformidad, por ejemplo, a un organismo notificado en el Área Económica Europea cuando así lo solicite.

NOTA 2 Los requisitos del apartado 4.3.2 permiten el uso del mismo inventario de tubos de cobre que los utilizados para la instalación de los sistemas de canalización para gases medicinales comprimidos de vacío conformes con la Norma Internacional ISO 7396-1.

**4.3.3** Se deben tener en cuenta los peligros potenciales que se originan de la utilización de tubos y componentes no metálicos, utilizando los procedimientos de gestión de los riesgos conformes con la Norma Internacional ISO 14971.

NOTA La experiencia muestra que es necesario evaluar cuidadosamente la durabilidad de los tubos no metálicos y sus uniones utilizados en los sistemas de eliminación de GAE después de la exposición a los agentes anestésicos volátiles.

**4.3.4** Todos los componentes del sistema, a excepción de los tubos de cobre, que entran en contacto con los gases y vapores anestésicos se deben limpiar conforme con la Norma Internacional ISO 15001.

El fabricante debe proporcionar la evidencia.

NOTA La normativa regional o nacional puede requerir la disposición de la evidencia a una autoridad competente o a un organismo de evaluación de la conformidad, por ejemplo, a un organismo notificado en el Área Económica Europea cuando así lo solicite.

**4.3.5** Si se utilizan lubricantes, deben ser compatibles con los gases y vapores anestésicos en las condiciones de funcionamiento especificadas por el fabricante.

El fabricante debe proporcionar la evidencia.

NOTA La normativa regional o nacional puede requerir la disposición de la evidencia a una autoridad competente o a un organismo de evaluación de la conformidad, por ejemplo, a un organismo notificado en el Área Económica Europea cuando así lo solicite.

**4.3.6** Se deben tomar precauciones para mantener la limpieza de los componentes durante el transporte, el almacenamiento y la instalación.

#### **4.4 Continuidad del funcionamiento**

El sistema de eliminación de GAE se debe diseñar para conseguir la continuidad del funcionamiento en la condición normal y en condición de primer fallo.

NOTA La pérdida de la energía eléctrica de red es una condición de primer fallo. Un fallo en el equipo de control es una condición de primer fallo.

Para conseguir estos objetivos, el sistema de eliminación de GAE debe comprender al menos dos fuentes de suministro de aire para accionar los eyectores de evacuación o al menos dos ventiladores, sopladores o bombas de vacío dedicadas.

El sistema de eliminación de GAE debe ser tal que el caudal de diseño del sistema se pueda suministrar cuando esté fuera de servicio una cualquiera de las fuentes de suministro de aire o uno cualquiera de los ventiladores, sopladores o bombas de vacío dedicadas.

Se debe proporcionar un medio de forma que cada dispositivo de potencia se pueda aislar para su mantenimiento o reparación.

## 5 DISPOSITIVO DE POTENCIA

**5.1** El dispositivo de potencia se debe utilizar exclusivamente para accionar el sistema de eliminación de GAE.

**5.2** El dispositivo de potencia debe ser uno de los siguientes:

- a) un eyector de evacuación, para una o más unidad(es) terminal(es) tipo 1 de SEGA, accionado por aire comprimido de un sistema de suministro para aire y un sistema de distribución canalizada que cumpla la Norma Internacional ISO 7396-1, dotado de un medio de ajuste del caudal desde el sistema colector a través de la unidad terminal tipo 1 para cumplir los requisitos especificados en los apartados 8.1.1 y 8.1.2 [véase la figura 2 a)];
- b) un eyector de evacuación para cada unidad terminal tipo 2 de SEGA, accionado por aire comprimido de un sistema de suministro para aire y un sistema de distribución canalizada que cumpla la Norma Internacional ISO 7396-1, dotado de un medio de ajuste del caudal desde el sistema colector a través de la unidad terminal tipo 1 para cumplir los requisitos especificados en el apartado 8.1.3 [véase la figura 2 b)];

NOTA 1 Debido al valor alto del caudal requerido para el sistema de eliminación de GAE, es aconsejable utilizar un sistema de suministro con compresor(es) o mezcladores.

c) al menos dos ventiladores, sopladores o bombas de vacío dedicadas.

NOTA 2 Puede existir normativa nacional o regional sobre los niveles de ruido en el interior de instalaciones sanitarias.

NOTA 3 Véase el anexo A para las recomendaciones sobre los dispositivos de potencia constituidos por ventiladores, sopladores o bombas de vacío dedicadas.

Si se instalan bombas de vacío dedicadas como dispositivo(s) de evacuación, deben ser compatibles con el oxígeno y los gases y vapores anestésicos.

(\*) No se debe utilizar un suministro de vacío conforme con la Norma Internacional ISO 7396-1 como dispositivo de potencia de SEGA.

**5.3** Se debe proporcionar un medio para ajustar la presión y el caudal en el sistema de eliminación para cumplir los requisitos dados en los apartados 8.1.1 y 8.1.2 para las unidades terminales tipo 1, independientemente del número de unidades terminales en uso [véase la figura 2 c)].

NOTA Tal medio puede estar situado ya sea dentro de la canalización y/o en combinación con la(s) unidad(es) terminal(es).

**5.4** Se debe disponer un medio para ajustar la presión y el caudal de forma que se puedan mantener sus valores sin interrumpir el funcionamiento.

El fabricante debe proporcionar la evidencia.

NOTA La normativa regional o nacional puede requerir la disposición de la evidencia a una autoridad competente o a un organismo de evaluación de la conformidad, por ejemplo, a un organismo notificado en el Área Económica Europea cuando así lo solicite.

**5.5** Los dispositivos de potencia tales como ventiladores, sopladores o bombas de vacío dedicadas no se deben ubicar en la misma sala que los suministros de botellas de gas y de líquido no criogénico.

**5.6** Las ubicaciones de los dispositivos de potencia que cumplen esta parte de la Norma Internacional ISO 7396 y los sistemas de suministro que cumplen la Norma Internacional ISO 7396-1 se deben decidir utilizando el proceso de gestión de los riesgos conforme con la Norma Internacional ISO 14971 para minimizar el riesgo derivado de los peligros tales como incendios, contaminación con aceite, grasa, y aumentos de la concentración de oxígeno y óxido nitroso.

## **6 SISTEMAS INDICADORES**

Se debe proporcionar un medio para indicar al operador que el sistema de eliminación de GAE está funcionando.

## **7 CANALIZACIONES, ENSAMBLADOS DE CONEXIÓN Y MANGUERAS DE ELIMINACIÓN**

**7.1** Si los ensamblados de conexión o las mangueras están fácilmente accesibles al operador, sus conexiones deben ser específicas del tipo de SEGA. Las dimensiones de los conectores deben ser diferentes de las especificadas en la Norma Internacional ISO 5359.

**7.2** Si se utilizan ensamblados de conexión flexible o mangueras de eliminación entre los componentes del sistema de eliminación y aquéllos no están fácilmente accesibles al operador sin que implique un desensamblado significativo de los componentes fijos y que no se sustituyen normalmente durante su vida útil, los conectores del ensamblado no necesitan ser específicos del tipo de SEGA. Las dimensiones de los conectores deben ser diferentes de las especificadas en la Norma Internacional ISO 5359.

NOTA Ejemplos de tales ensamblados son aquéllos incluidos en soportes de brazos giratorios, cabeceros suspendidos del techo y paneles técnicos y los utilizados para el aislamiento de la vibración, del movimiento del edificio y del movimiento relativo de las canalizaciones.



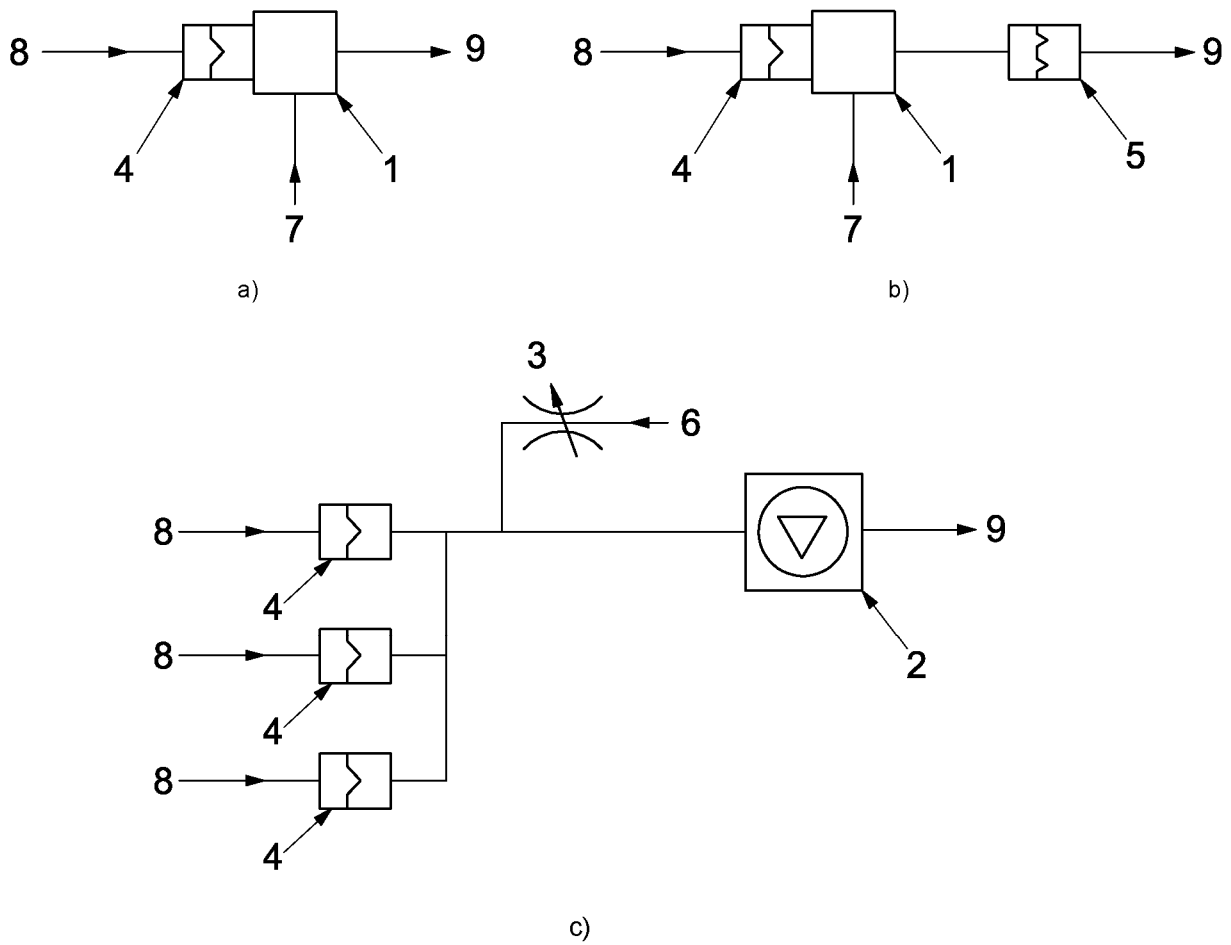

Leyenda

- 1 dispositivo de potencia accionado por aire comprimido
- 2 dispositivo de potencia de bomba de vacío/ventilador/soplador
- 3 medio para ajustar la presión y el caudal
- 4 unidad terminal tipo 1
- 5 unidad terminal tipo 2
- 6 aire ambiente
- 7 aire comprimido
- 8 sistema colector
- 9 punto de descarga

**Figura 2 – Ejemplos típicos de dispositivos de potencia**

## **8 CARACTERÍSTICAS DEL SISTEMA DE ELIMINACIÓN Y MÉTODOS DE ENSAYO DE LA PRESIÓN Y DEL CAUDAL**

### **8.1 Requisitos**

#### **8.1.1 Requisitos del sistema de eliminación de GAE con unidades terminales tipo 1L**

El caudal a través de cada unidad terminal tipo 1L o, si no está instalada, en el punto interfase aguas arriba del dispositivo de potencia (véase la figura 1) no debe ser superior a 50 l/min, cuando la resistencia al flujo, que está dispuesta para simular la resistencia del sistema colector, es tal que produce un descenso de presión de 1 kPa a 50 l/min, y no debe ser inferior a 25 l/min cuando la resistencia al flujo, que está dispuesta para simular la resistencia del sistema colector, es tal que produce un descenso de presión de 2 kPa a 25 l/min (véase también el apartado 10.1 de la Norma Internacional ISO 8835-3:—).

#### **8.1.2 Requisitos del sistema de eliminación de GAE con unidades terminales tipo 1H**

El caudal a través de cada unidad terminal tipo 1H o, si no está instalada, en el punto interfase aguas arriba del dispositivo de potencia (véase la figura 1) no debe ser superior a 80 l/min, cuando la resistencia al flujo, que está dispuesta para simular la resistencia del sistema colector, es tal que produce un descenso de presión de 1 kPa a 80 l/min, y no debe ser inferior a 50 l/min cuando la resistencia al flujo, que está dispuesta para simular la resistencia del sistema colector, es tal que produce un descenso de presión de 2 kPa a 50 l/min (véase también el apartado 10.2 de la Norma Internacional ISO 8835-3:—).

#### **8.1.3 Requisitos del sistema de eliminación de GAE con unidades terminales tipo 2**

Con un caudal de 50 l/min a través del casquillo de cada unidad terminal tipo 2 de SEGA, el descenso de presión no debe ser superior a 7,5 kPa.

### **8.2 Métodos de ensayo de la presión y del caudal**

#### **8.2.1 Generalidades**

**8.2.1.1** Para controlar el flujo en cada unidad terminal se deben ajustar todos los medios de ajuste de la presión y del caudal. Cada unidad terminal del sistema se debe ensayar como sigue:

- a) con solamente la unidad terminal objeto del ensayo en uso,
- b) para los sistemas con más de una unidad terminal, con todas las unidades terminales en uso que sean requeridas para proporcionar el caudal de diseño del sistema para el factor de diversificación especificado.

**8.2.1.2** El ensayo se debe efectuar utilizando aire ambiente.

**8.2.1.3** La resolución y la exactitud de todos los dispositivos de medición utilizados para el ensayo deben ser apropiados para los valores a medir. Todos los dispositivos de medición utilizados para la certificación se deben calibrar a intervalos apropiados.

#### **8.2.2 Métodos de ensayo del caudal en sistemas de eliminación dotados de unidades terminales tipo 1L**

##### **8.2.2.1 Aparatos de ensayo**

Para simular la resistencia al flujo de un sistema colector que cumpla la Norma Internacional ISO 8835-3, se deben utilizar aparatos de ensayo calibrados dotados de cabezales 1L y que produzcan un descenso de presión de 1 kPa a un caudal de 50 l/min (aparato de ensayo 1/50) y de 2 kPa a un caudal de 25 l/min (aparato de ensayo 2/25).

NOTA En la figura 3 se muestra un aparato de ensayo típico.

### 8.2.2.2 Procedimiento

8.2.2.2.1 Se activa el dispositivo de potencia en el sistema de eliminación de GAE.

8.2.2.2.2 Un aparato de ensayo dotado de un cabezal tipo 1L que produce un descenso de presión de 1 kPa a 50 l/min se debe insertar sucesivamente en cada unidad terminal tipo 1L con todas las demás unidades terminales cerradas. Se debe registrar el caudal del aparato de ensayo en cada unidad terminal.

8.2.2.2.3 Un aparato de ensayo dotado de un cabezal tipo 1L que produce un descenso de presión de 2 kPa a 25 l/min se debe insertar sucesivamente en cada unidad terminal tipo 1L con todas las demás unidades terminales cerradas. Se debe registrar el caudal del aparato de ensayo en cada unidad terminal.

8.2.2.2.4 Se deben insertar cabezales tipo 1L que producen un descenso de presión de 1 kPa a 50 l/min en cada una de varias unidades terminales 1L hasta el caudal de diseño del sistema de eliminación de GAE con todas las demás unidades terminales cerradas. Sucesivamente en cada unidad terminal se debe insertar un aparato de ensayo con cabezal tipo 1L que produce un descenso de presión de 2 kPa a 25 l/min. Se debe registrar el caudal en cada unidad terminal cuando está conectado este aparato de ensayo.

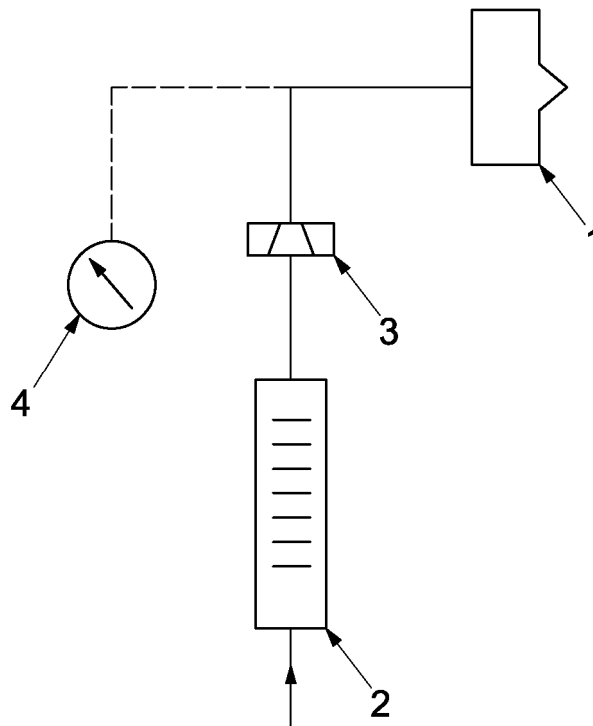

Leyenda

- 1 cabezal tipo 1
- 2 flujómetro
- 3 orificio fijo
- 4 dispositivo de medición de la presión (solamente para la calibración)

**Figura 3 – Aparato de ensayo típico de las características del sistema de eliminación de GAE (con unidades terminales tipo 1)**

8.2.2.2.5 Los ensayos en los apartados 8.2.2.2.2, 8.2.2.2.3 y 8.2.2.2.4 se deben efectuar utilizando el mismo valor del medio de ajuste de la presión y del caudal. Los resultados se deben registrar en un documento tal como el impreso C.7.1 (véase el anexo C).

### **8.2.3 Métodos de ensayo del caudal en los sistemas de eliminación dotados de unidades terminales tipo 1H**

#### **8.2.3.1 Aparatos de ensayo**

Para simular la resistencia al flujo de un sistema colector que cumpla la Norma Internacional ISO 8835-3, se deben utilizar aparatos de ensayo calibrados dotados de cabezales 1H y que produzcan un descenso de presión de 1 kPa a un caudal de 80 l/min (aparato de ensayo 1/80) y de 2 kPa a un caudal de 50 l/min (aparato de ensayo 2/50).

NOTA En la figura 3 se muestra un aparato de ensayo típico.

#### **8.2.3.2 Procedimiento**

**8.2.3.2.1** Se activa el dispositivo de potencia en el sistema de eliminación de GAE objeto del ensayo.

**8.2.3.2.2** Un aparato de ensayo dotado de un cabezal tipo 1H que produce un descenso de presión de 1 kPa a 80 l/min se debe insertar sucesivamente en cada unidad terminal tipo 1H con todas las demás unidades terminales cerradas. Se debe registrar el caudal del aparato de ensayo en cada unidad terminal.

**8.2.3.2.3** Un aparato de ensayo dotado de un cabezal tipo 1H que produce un descenso de presión de 2 kPa a 50 l/min se debe insertar sucesivamente en cada unidad terminal tipo 1H con todas las demás unidades terminales cerradas. Se debe registrar el caudal del aparato de ensayo en cada unidad terminal.

**8.2.3.2.4** Se deben insertar cabezales tipo 1H, que producen un descenso de presión de 1 kPa a 80 l/min, en cada una de varias unidades terminales 1H hasta el caudal de diseño del sistema de eliminación de GAE con todas las demás unidades terminales cerradas. Sucesivamente en cada unidad terminal se debe insertar un aparato de ensayo con cabezal tipo 1H, que produce un descenso de presión de 2 kPa a 50 l/min. Se debe registrar el caudal en cada unidad terminal cuando está conectado este aparato de ensayo.

**8.2.3.2.5** Los ensayos en los apartados 8.2.3.2.2, 8.2.3.2.3 y 8.2.3.2.4 se deben efectuar utilizando el mismo valor del medio de ajuste de la presión y del caudal. Los resultados se deben registrar en un documento tal como el impreso C.7.2 (véase el anexo C).

### **8.2.4 Método de ensayo de la presión en sistemas de eliminación dotados de unidades terminales tipo 2**

#### **8.2.4.1 Aparatos de ensayo**

Se deben utilizar aparatos de ensayo dotados de un cabezal tipo 2 que proporcionen caudales hasta un valor de 50 l/min.

#### **8.2.4.2 Procedimiento**

**8.2.4.2.1** Se activa el dispositivo de potencia.

**8.2.4.2.2** El cabezal del aparato de ensayo se debe insertar sucesivamente en cada unidad terminal con todas las demás unidades terminales cerradas. El caudal se debe ajustar a  $(50 \pm 5)$  l/min. Se debe registrar la presión a la entrada de cada unidad terminal.

**8.2.4.2.4** Los resultados se deben registrar en un documento tal como el impreso C.7.3 (véase el anexo C).

### **8.3 Medio de impedir el reflujo**

Para los sistemas de eliminación con eyectores de evacuación accionados por aire comprimido, se debe proporcionar un medio para impedir el reflujo de gases y vapores anestésicos de eliminación a través de las unidades terminales.

NOTA Esto se puede conseguir, por ejemplo, utilizando tubos individuales o válvulas unidireccionales.

## 9 UNIDADES TERMINALES

Las unidades terminales deben cumplir la Norma Internacional ISO 9170-2.

## 10 MARCADO Y CÓDIGO DE COLOR

### 10.1 Marcado

**10.1.1** Las canalizaciones se deben marcar con las siglas “AGSS” o siglas nacionales equivalentes (“SEGA”) y deben tener flechas que indiquen la dirección del flujo adyacentes a las válvulas (si existen) en las uniones y cambios de dirección, antes y después de paredes y tabiques, etc., a intervalos de longitud no superior a 10 m y adyacentes a las unidades terminales.

**10.1.2** Los ensamblados de conexión y las mangueras de eliminación se deben marcar con las siglas “AGSS” o siglas nacionales equivalentes (“SEGA”).

**10.1.3** El marcado debe ser:

- a) duradero;
- b) con letras de altura no inferior a 6 mm para las canalizaciones y no inferior a 2,5 mm para los ensamblados de conexión y mangueras de eliminación.

### 10.2 Código de color

**10.2.1** Si se utiliza un código de color, debe ser rojo magenta o conforme con la norma nacional.

NOTA Un ejemplo de rojo magenta es 3050-R40B, conforme con el patrón SS 01 91 02.

**10.2.2** Si se utiliza un código de color, debe ser duradero.

### 10.3 Ensayo de indelebilidad

El ensayo de la indelebilidad de los marcados y del código de color se da en el apartado 12.4.10.

## 11 INSTALACIÓN DE LA CANALIZACIÓN

**11.1** Las canalizaciones y los servicios eléctricos deben:

- a) discurrir en compartimentos separados; o
- b) estar separados más de 50 mm.

NOTA Puede existir normativa regional o nacional aplicable a las instalaciones eléctricas en edificios.

**11.2** Las canalizaciones metálicas, si procede, deben estar unidas a un terminal de tierra lo más cerca posible del punto en el que la canalización entra en el edificio. Las canalizaciones no se deben utilizar para la toma de tierra del equipo eléctrico.

NOTA 1 Puede existir normativa regional o nacional aplicable a las instalaciones eléctricas en edificios.

NOTA 2 Puede existir normativa regional o nacional aplicable a la continuidad de la conexión de tierra a través de todas las uniones dentro del mismo edificio y al aislamiento eléctrico mutuo de edificios diferentes.

**11.3** Las canalizaciones se deben proteger del daño físico, por ejemplo, del daño que se puede originar del movimiento del equipo portátil tal como mesas de ruedas, camillas y carros, en los pasillos y en otros lugares.

**11.4** Las canalizaciones no protegidas que contienen gas a presión superior a la atmosférica no se deben instalar en zonas de peligro especial. Cuando sea inevitable la instalación de canalizaciones en tales lugares, la canalización se debe proteger en un recinto que impida la liberación de gases dentro de la sala en caso de ocurrir una fuga en la canalización instalada en la zona.

NOTA1 Una zona en la que se almacenan materiales inflamables es un ejemplo de una zona de peligro especial.

NOTA 2 Puede existir normativa regional o nacional aplicable a los requisitos de construcción y de prevención de incendios.

**11.5** Si las canalizaciones se colocan enterradas, se deben colocar en túneles o conductos. El túnel o el conducto debe estar provisto de drenaje adecuado para impedir la acumulación de agua. Si las canalizaciones se colocan en el mismo túnel, zanja o conducto conjuntamente con canalizaciones de combustible, líneas de vapor de agua u otros servicios, deben estar separadas más de 50 mm. Los conductos en los que se instalan canalizaciones deben estar ventilados.

Si las canalizaciones para un sistema de eliminación de GAE se colocan en un túnel o conducto con otros servicios o con canalizaciones para otros fluidos o gases, el peligro potencial que surge de esta ubicación se debe evaluar utilizando los procedimientos de gestión de los riesgos conformes con la Norma Internacional ISO 14971. La evaluación de los riesgos debe tener en cuenta que una fuga que no se detecta (por ejemplo, por una alarma u otro medio tal como una inspección periódica recomendada por el fabricante) se debe considerar una condición normal y no una condición de primer fallo. El trazado de los tubos enterrados se debería indicar en el sitio por medios apropiados, por ejemplo, mediante cinta de marcar continua sobre la canalización aproximadamente a la mitad de la profundidad de enterramiento.

**11.6** Las canalizaciones no se deben instalar en los huecos de los ascensores.

**11.7** Se debe minimizar el daño debido al contacto con materiales corrosivos, por ejemplo, mediante el uso de materiales no metálicos impermeables aplicados a la superficie exterior de los tubos en la zona donde puede ocurrir el contacto.

**11.8** Se deben tener en cuenta la expansión y la contracción de las canalizaciones.

**11.9** Si es probable que se produzca condensación en el interior de las canalizaciones, se debe proporcionar un medio para eliminar la condensación del sistema.

**11.10** Las canalizaciones deben tener soportes a intervalos para impedir el pandeo o la distorsión. Los intervalos recomendados para los tubos metálicos rígidos se dan en la tabla 1.

**Tabla 1 – Intervalos recomendados entre los soportes para tubos metálicos**

| <b>Diámetro exterior</b><br>mm                                                                       | <b>Intervalos máximos entre soportes</b> <sup>a</sup><br>m |
|------------------------------------------------------------------------------------------------------|------------------------------------------------------------|
| hasta 15                                                                                             | 1,5                                                        |
| 22 a 28                                                                                              | 2,0                                                        |
| 35 a 54                                                                                              | 2,5                                                        |
| mayor de 54                                                                                          | 3,0                                                        |
| <sup>a</sup> Se pueden requerir intervalos más cortos cuando se utilizan tubos no metálicos rígidos. |                                                            |

**11.11** Los soportes deben asegurar que la canalización no se pueda desplazar de forma accidental.

Los soportes deben ser de material resistente a la corrosión, o se deben tratar para impedir la corrosión. Se deben proporcionar medios para impedir la corrosión electrolítica entre los tubos y las superficies de contacto de los soportes.

Cuando las canalizaciones cruzan cables eléctricos, los tubos deben tener soportes adyacentes a los cables.

Las canalizaciones no se deben utilizar como soporte, ni servir de soporte, para otras canalizaciones o conductos.

**11.12** Excepto para las uniones mecánicas utilizadas para ciertos componentes, todas las uniones de la canalización metálica se deben soldar con latón o con soldadura normal. Los métodos utilizados para la soldadura con latón o normal deben permitir que las juntas mantengan sus características mecánicas hasta una temperatura ambiente de 600 °C. Los metales de aportación para la soldadura con latón deben estar nominalmente exentos de cadmio (por ejemplo, menos de 0,025% en fracción en masa de cadmio).

NOTA Se pueden utilizar las uniones mecánicas (por ejemplo, conexiones con brida o roscadas) para conectar a la canalización los componentes tales como válvulas de corte, unidades terminales, reguladores de presión, controles y sensores de supervisión y alarma.

**11.13** La salida de evacuación del sistema de eliminación se debe canalizar al exterior o al interior del conducto de evacuación de un sistema de ventilación no recirculante y debe estar dotada de un medio para impedir el ingreso de insectos, escombros y precipitación.

La ubicación de las salidas de evacuación debe estar alejada de la toma de aire para los sistemas compresores de aire, de otras tomas de aire, puertas, ventanas u otras aberturas en los edificios.

Se deberían considerar los efectos potenciales de los vientos imperantes cuando se considere la ubicación de la salida de evacuación.

Si la salida de evacuación es accesible al personal de la instalación, se debe colocar una señal de advertencia contra la inhalación de gases nocivos en el punto de descarga.

## **12 ENSAYOS, PUESTA EN SERVICIO Y CERTIFICACIÓN**

### **12.1 Generalidades**

El fabricante debe efectuar, documentar y certificar los ensayos después de que se ha completado la instalación.

NOTA Puede existir normativa regional o nacional que requiera que el fabricante tenga un sistema de la calidad aprobado.

Un ejemplo de un procedimiento para los ensayos y puesta en servicio se da en el anexo B.

### **12.2 Requisitos generales para los ensayos**

**12.2.1** Los ensayos se deben efectuar con aire ambiente.

**12.2.2** Antes de efectuar cualquier ensayo, cada unidad terminal en un sistema objeto del ensayo se debe etiquetar para indicar que el sistema se está ensayando y que la unidad terminal no se debe utilizar.

**12.2.3** La resolución y la exactitud de todos los dispositivos de medición utilizados para el ensayo deben ser apropiadas para los valores a medir. Todos los dispositivos de medición utilizados para la certificación se deben calibrar a intervalos apropiados.

### **12.3 Ensayos, inspecciones y comprobaciones**

Se deben efectuar los ensayos, las inspecciones y las comprobaciones siguientes antes de utilizar el sistema:

- a) inspecciones y ensayos de fugas;
- b) inspección del marcado y de los intervalos de soporte del sistema de canalización;
- c) comprobación del funcionamiento mecánico y de la limpieza de las unidades terminales;
- d) ensayo de contaminación cruzada;
- e) ensayos del funcionamiento de los dispositivos de potencia;
- f) ensayos de la presión y del caudal en las unidades terminales;
- g) comprobación del sistema indicador;
- h) comprobación de la salida de evacuación del sistema de eliminación de GAE;
- i) comprobación de la identificación y etiquetado de las unidades terminales.

### **12.4 Requisitos de los ensayos, inspecciones y comprobaciones enumerados en el apartado 12.3**

#### **12.4.1 Inspección y fugas**

**12.4.1.1** Se debe inspeccionar visualmente la integridad de todas las conexiones de las canalizaciones aguas abajo del dispositivo de potencia.

**12.4.1.2** Las canalizaciones entre una unidad terminal tipo 1 y un dispositivo de potencia se deben ensayar a una presión de  $70 \text{ kPa} \pm 10\%$ . El descenso de presión en estas secciones, después de un periodo de ensayo de 15 min con las unidades terminales obturadas, debe ser menos de 10 kPa.

#### **12.4.2 Marcado e intervalos de soporte del sistema de canalización**

El marcado del sistema de canalización debe cumplir los requisitos del apartado 10.1. El código de color del sistema de canalización, si se utiliza, debe cumplir los requisitos del apartado 10.2. Los intervalos de soporte deben cumplir los requisitos del apartado 11.10.

#### **12.4.3 Funcionamiento mecánico y limpieza de las unidades terminales**

Se debe demostrar para cada unidad terminal que el cabezal apropiado se puede insertar, capturar y liberar. Todas las unidades terminales se deben inspeccionar para verificar la ausencia de partículas visibles.

#### **12.4.4 Conexión cruzada**

No debe existir ninguna conexión cruzada con ningún otro sistema de canalización.

#### **12.4.5 Funcionamiento de los dispositivos de potencia**

Todos los dispositivos de potencia deben funcionar conformes con los manuales y las especificaciones del fabricante.

#### **12.4.6 Presión y caudal en las unidades terminales**

Se debe demostrar que el caudal en cada unidad terminal tipo 1 de SEGA es conforme con el apartado 8.1.1.

Se debe demostrar que el caudal en cada unidad terminal tipo 1H de SEGA es conforme con el apartado 8.1.2.



Se debe demostrar que el caudal en cada unidad terminal tipo 2 de SEGA es conforme con el apartado 8.1.3.

#### **12.4.7 Sistema indicador**

El sistema indicador debe cumplir el capítulo 6.

#### **12.4.8 Salida de evacuación del sistema de eliminación de GAE**

La salida de evacuación del sistema de eliminación debe cumplir el apartado 11.13.

#### **12.4.9 Identificación y etiquetado de las unidades terminales**

Cuando todos los ensayos, inspecciones y comprobaciones descritos en los apartados 12.4.1 a 12.4.8 se hayan completado satisfactoriamente, se deben eliminar todas las etiquetas de construcción que se hayan colocado. Al mismo tiempo, se debe comprobar la identificación y el etiquetado correctos (marcado y, si existe, el código de color) de cada unidad terminal.

#### **12.4.10 Ensayo de la indelebilidad de los marcados y del código de color**

Se frota manualmente los marcados y el código de color, sin aplicar una presión indebida, primero durante 15 s con un trapo de tela empapado en agua destilada, después durante 15 s con un trapo de tela empapado en etanol y por último, durante 15 s con un trapo de tela empapado en isopropanol. Este ensayo se efectúa a temperatura ambiente. Los marcados deben permanecer legibles.

### **12.5 Certificación del sistema**

Antes de utilizar un sistema de eliminación de GAE, se debe certificar por escrito a la instalación sanitaria que se han efectuado satisfactoriamente todos los ensayos, inspecciones y comprobaciones dados en el apartado 12.3 y que se han cumplido todos los requisitos del apartado 12.4. Los resultados de los ensayos mostrando los detalles de los servicios y zonas ensayadas deberían ser parte del registro permanente de la instalación sanitaria.

NOTA Los impresos típicos para este fin se dan en el anexo C.

El fabricante del sistema debe certificar que todos los dibujos y manuales, según requiere el capítulo 13, han sido suministrados al dueño o cliente.

### **12.6 Ampliaciones o modificaciones**

Cuando se hacen ampliaciones o modificaciones del sistema, se deben efectuar los ensayos, inspecciones y comprobaciones apropiados del apartado 12.3 antes del regreso del sistema al servicio.

## **13 INFORMACIÓN A SUMINISTRAR POR EL FABRICANTE**

### **13.1 Generalidades**

La información a proporcionar por el fabricante debe ser conforme con la Norma Europea EN 1041 o normas nacionales equivalentes.

### **13.2 Instrucciones de uso**

**13.2.1** El fabricante del sistema completo o el (los) fabricante(s) de cada componente del sistema de eliminación de GAE (es decir, del dispositivo de potencia, de las unidades terminales y del sistema de canalización) debe(n) proporcionar a la instalación sanitaria las instrucciones de uso.

NOTA 1 El dispositivo de potencia, las unidades terminales y el sistema de canalización los pueden suministrar uno o varios fabricantes diferentes.

NOTA 2 Puede existir normativa regional o nacional aplicable a los fabricantes de productos sanitarios.

**13.2.2** Las instrucciones de uso deben contener lo siguiente:

- el nombre o nombre comercial y la dirección del fabricante;
- el año de fabricación y, cuando proceda, la vida útil del sistema y de sus componentes, cualquier condición especial de almacenamiento y manipulación;
- cualquier instrucción de funcionamiento especial;
- cualquier advertencia y/o precaución a tomar, en particular el peligro de incendio o explosión debido a la utilización de aceite y grasa en atmósferas ricas en oxígeno o a la utilización de agentes anestésicos inflamables;
- el número de serie o de lote;
- una especificación técnica incluyendo las prestaciones del sistema y cómo conectar y desconectar las partes y los accesorios separables;
- una descripción del sistema indicador;
- la posición en la condición normal (es decir, abiertas o cerradas) de todas las válvulas de corte, si existen;
- las instrucciones para las comprobaciones periódicas recomendadas del funcionamiento del sistema;
- las instrucciones para las tareas de mantenimiento recomendadas y su frecuencia, y una lista de los repuestos recomendados, si procede;
- la información adecuada sobre los gases y vapores anestésicos para cuya utilización está diseñado el sistema;
- las instrucciones para la eliminación de los componentes o fungibles (por ejemplo, el aceite utilizado en los compresores y bombas de vacío).

**13.2.3** Las instrucciones de uso dadas en el apartado 13.2.2 se deben redactar teniendo en cuenta la posibilidad de que existan varias partes diferentes implicadas en la operación, uso y mantenimiento.

### **13.3 Información de la gestión operacional**

**13.3.1** El(los) fabricante(s) de cada componente del sistema de eliminación de GAE (es decir, el dispositivo de potencia, las unidades terminales y el sistema de canalización) deben proporcionar la información de la gestión operacional a la instalación sanitaria para permitir que redacte su documento de gestión operacional.

**13.3.2** El(los) fabricante(s) del sistema deben proporcionar las instrucciones a la instalación sanitaria para las tareas de mantenimiento recomendadas y su frecuencia, y una lista de los repuestos recomendados, si procede.

NOTA Las recomendaciones informativas para la preparación del documento de gestión operacional se dan en el anexo G de la Norma Internacional ISO 7396-1:2007. Las recomendaciones informativas para efectuar un procedimiento de gestión de los riesgos se dan en el anexo D.

### **13.4 Dibujos “tal cual está instalado”**

**13.4.1** Se debe mantener durante la construcción un conjunto separado de dibujos mecánicos “tal cual está instalado” que muestren la ubicación real de las canalizaciones, los diámetros de las mismas, las válvulas de corte y todos los demás componentes, y se debe actualizar conforme se hacen cambios. Estos dibujos deben incluir los detalles que permitirán localizar las canalizaciones enterradas u ocultas.

**13.4.2** Se debe presentar a la instalación sanitaria un conjunto completo de dibujos “tal cual está instalado” del sistema de canalización según se especifica en el apartado 13.4.1 para inclusión como parte del registro permanente del sistema de canalización.

### **13.5 Diagramas eléctricos**

El fabricante del sistema debe proporcionar a la instalación sanitaria los esquemas eléctricos de los componentes suministrados.

**ANEXO A (Informativo)****RECOMENDACIONES PARA LOS DISPOSITIVOS DE POTENCIA CONSTITUIDOS  
POR VENTILADORES, SOPLADORES O BOMBAS DE VACÍO DEDICADAS**

**A.1** Los servicios que contienen gases o líquidos combustibles no se deberían permitir dentro de la zona del dispositivo de potencia.

**A.2** Todos los accesorios eléctricos en las salas de dispositivos de potencia deberían estar ubicados en posiciones fijas para minimizar el riesgo de daño físico.

**A.3** Se debería proporcionar equipo contra incendios dentro de la zona del dispositivo de potencia.

NOTA Puede existir normativa regional o nacional aplicable a la protección contra incendios.

**A.4** La zona del dispositivo de potencia debería estar bien ventilada a la atmósfera exterior. El conducto de ventilación no debería estar conectado a los conductos de servicio de ningún otro edificio.

**A.5** Las puertas o la entrada se deberían poder cerrar con candado. Se debería proporcionar una salida de emergencia que debería estar libre de obstrucciones en todo momento. Cualquier puerta se debería poder abrir sin llave desde el interior en todo momento. Todas las puertas se deberían abrir hacia el exterior.

**A.6** Las salas de dispositivos de potencia deberían:

- a) cumplir la normativa de construcción local;
- b) mostrar un aviso de advertencia de “NO FUMAR” o indicación similar, claramente visible en ambos lados de cada puerta o entrada.

**A.7** Los capítulos A.1 a A.6 se aplican a los dispositivos de potencia que están ubicados centralmente. La instalación y el servicio técnico de los dispositivos de potencia no ubicados centralmente y que pueden o no estar conectados a un sistema de canalización se deberían efectuar conforme con las instrucciones suministradas por el fabricante.

## **ANEXO B (Informativo)**

### **EJEMPLO DEL PROCEDIMIENTO PARA LOS ENSAYOS Y LA PUESTA EN SERVICIO**

#### **B.1 Generalidades**

Este procedimiento de ensayo se da como un ejemplo de cómo se pueden verificar las especificaciones del capítulo 12 para la puesta en servicio y la certificación del sistema. Se pueden utilizar otros procedimientos para ensayar de forma válida estas especificaciones. En este procedimiento, la secuencia dada de ensayos es importante y se debería seguir. Se deberían seguir los requisitos generales del apartado 12.3.

Cuando los resultados de un ensayo no cumplen los criterios de aceptación, se debe efectuar trabajo correctivo y se deben repetir los ensayos anteriores según sea necesario.

Los impresos típicos para la certificación del sistema se dan en el anexo C. Un resumen de los ensayos típicos requeridos en donde se enumera la especificación, el procedimiento y el modelo de impreso para cada ensayo se da en el impreso C.1.

#### **B.2 Inspección y ensayos de fugas**

##### **B.2.1 Inspección**

Se inspecciona visualmente el sistema de canalización de evacuación para verificar la integridad de todas las conexiones.

##### **B.2.2 Ensayos de fugas**

###### **B.2.2.1 Condiciones generales**

Se aísla el dispositivo de potencia de la canalización. Se abren todas las válvulas de corte (si existen) y se obturan todas las unidades terminales tipo 1. Si es necesario, se retiran todos los medios de ajuste del caudal y se obturan sus puntos de conexión.

###### **B.2.2.2 Ejemplo del procedimiento**

Se conecta un dispositivo de medición de la presión al sistema objeto del ensayo. Se llena el sistema con gas comprimido limpio, exento de aceite y seco a una presión de 70 kPa  $\pm$  10%. Se registra la presión y, después de un periodo de 15 min, se registra de nuevo la presión. El descenso de presión no debe ser superior a 10 kPa.

NOTA No existe ninguna tolerancia para la variación de temperatura en este ensayo.

###### **B.2.2.3 Resultados del ensayo**

Los resultados se registran en un documento tal como el impreso C.2.

#### **B.3 Inspección del marcado e intervalos de soporte del sistema de canalización**

##### **B.3.1 Ejemplo del procedimiento**

Se inspecciona visualmente que el marcado se ha colocado correctamente en el sistema de canalización, especialmente en las posiciones adyacentes a las conexiones en T y allí donde el sistema de canalización atraviesa paredes o tabiques. Se comprueba que el marcado cumple el apartado 10.1 y que el código de color, si se utiliza, cumple el apartado 10.2. Se comprueba que los intervalos de soporte cumplen el apartado 11.10.

**B.3.2 Resultados del ensayo**

Los resultados se registran en un documento tal como el impreso C.3.

**B.4 Comprobación del funcionamiento mecánico y de la inspección de limpieza de las unidades terminales****B.4.1 Ejemplo del procedimiento**

**B.4.1.1** Se inspeccionan los cabezales de ensayo para asegurar que son conformes con la Norma Internacional ISO 9170-2. Se inserta un cabezal de ensayo sucesivamente en cada unidad terminal. Se comprueba que el cabezal se puede insertar, puede quedar retenido y se puede liberar.

**B.4.1.2** Se comprueba la ausencia de partículas visibles en cada unidad terminal.

**B.4.2 Resultados del ensayo**

Los resultados se registran en un documento tal como el impreso C.4.

**B.5 Ensayo de conexión cruzada****B.5.1 Ejemplo del procedimiento**

Se ensaya el sistema de canalización del sistema de eliminación de GAE para verificar la ausencia de conexión cruzada con cualquier otro sistema de canalización de gas medicinal o de vacío. Con todos los dispositivos de potencia desconectados y con todos los otros sistemas de canalización de gases medicinales o de vacío presurizados, se comprueba en todas las unidades terminales de SEGA que no existe ninguna presión ni vacío.

**B.5.2 Resultados del ensayo**

Los resultados se registran en un documento tal como el impreso C.5.

**B.6 Ensayos del funcionamiento de los dispositivos de potencia****B.6.1 Ejemplo del procedimiento**

Se ensayan todos los dispositivos de potencia conformes con los manuales y especificaciones del fabricante.

**B.6.2 Resultados del ensayo**

Los resultados se registran en un documento tal como el impreso C.6.

**B.7 Ensayo de la presión y del caudal en las unidades terminales****B.7.1 Ejemplos de los procedimientos**

Los procedimientos para el ensayo del caudal en las unidades terminales tipo 1L se dan en el apartado 8.2.2.

Los procedimientos para el ensayo del caudal en las unidades terminales tipo 1H se dan en el apartado 8.2.3.

Los procedimientos para el ensayo de la presión en las unidades terminales tipo 2 se dan en el apartado 8.2.4.

**B.7.2 Resultados del ensayo**

Los resultados se registran en documentos tales como los impresos C.7.1, C.7.2 y C.7.3.

## **B.8 Comprobación del sistema indicador**

### **B.8.1 Ejemplo del procedimiento**

Se comprueba el funcionamiento del medio proporcionado para indicar al operador que el dispositivo de potencia está funcionando.

### **B.8.2 Resultados del ensayo**

Los resultados se registran en un documento tal como el impreso C.8.

## **B.9 Comprobación de la evacuación del sistema de eliminación de GAE**

### **B.9.1 Ejemplo del procedimiento**

Se verifica que la evacuación del sistema de eliminación de GAE:

- está canalizada ya sea al exterior o en el conducto de evacuación de un sistema de ventilación no recirculante;
- está dotada de un medio para impedir el ingreso de insectos;
- está en una posición en la que el riesgo de contaminación de los edificios ocupados se ha minimizado; y
- que la etiqueta de advertencia de evacuación (si existe) es legible.

### **B.9.2 Resultados del ensayo**

Los resultados se registran en un documento tal como el impreso C.9.

## **B.10 Comprobación de la identificación y etiquetado de las unidades terminales**

### **B.10.1 Ejemplo del procedimiento**

Se comprueba que los ensayos en los capítulos B.2 a B.9 se han completado de forma satisfactoria.

Se retira la etiqueta de construcción de cada unidad terminal que indica que el sistema no se ha de utilizar. Estas etiquetas no se deben retirar a menos que se hayan completado de forma satisfactoria todos los ensayos precedentes. Al mismo tiempo, se comprueba la identificación y etiquetado correctos (los marcados y, si se ha utilizado, el código de color) de cada unidad terminal.

### **B.10.2 Resultados del ensayo**

Los resultados se registran en un documento tal como el impreso C.10.

**ANEXO C (Informativo)**

**IMPRESOS TÍPICOS DE CERTIFICACIÓN DE LOS SISTEMAS DE ELIMINACIÓN DE GAE**

Los impresos dados en este anexo se han de cumplimentar durante los ensayos y la puesta en marcha de los sistemas de eliminación de GAE conformes con el anexo B.

**Impreso C.1 – Resumen de los ensayos**

Instalación sanitaria

Identificación de la zona

Este documento es para certificar que los ensayos y procedimientos siguientes se han efectuado de forma satisfactoria en el sistema de eliminación de gases anestésicos evacuados en la instalación sanitaria

(Página ..... de ..... páginas)

| <b>Impreso</b> | <b>Descripción de los ensayos y procedimientos</b>            | <b>Ensayo requerido</b><br>Sí/No | <b>Procedimiento</b> | <b>Especificación</b> | <b>Fecha de terminación de los ensayos y procedimientos</b> |
|----------------|---------------------------------------------------------------|----------------------------------|----------------------|-----------------------|-------------------------------------------------------------|
| C.1            | Resumen de los ensayos                                        |                                  |                      |                       |                                                             |
| C.2            | Fugas                                                         |                                  | B.2                  | 12.4.1                |                                                             |
| C.3            | Marcado e intervalos de soporte del sistema de canalización   |                                  | B.3                  | 12.4.2                |                                                             |
| C.4            | Funcionamiento mecánico y limpieza de las unidades terminales |                                  | B.4                  | 12.4.3                |                                                             |
| C.5            | Conexión cruzada                                              |                                  | B.5                  | 12.4.4                |                                                             |
| C.6            | Funcionamiento de los dispositivos de potencia                |                                  | B.6                  | 12.4.5                |                                                             |
| C.7            | Presión y caudal en las unidades terminales                   |                                  | B.7                  |                       |                                                             |
| C.7.1          | – para las unidades terminales tipo 1L                        |                                  | 8.2.2                | 12.4.6                |                                                             |
| C.7.2          | – para las unidades terminales tipo 1H                        |                                  | 8.2.3                |                       |                                                             |
| C.7.3          | – para las unidades terminales tipo 2                         |                                  | 8.2.4                |                       |                                                             |
| C.8            | Sistema indicador                                             |                                  | B.8                  | 12.4.7                |                                                             |
| C.9            | Evacuación del sistema de eliminación de GAE                  |                                  | B.9                  | 12.4.8                |                                                             |
| C.10           | Identificación y etiquetado de las unidades terminales        |                                  | B.10                 | 12.4.9                |                                                             |

**Representante del fabricante**

Puesto

Firma

Fecha

Nombre

**Persona autorizada**

Puesto

Firma

Fecha

Nombre



**Impreso C.2 – Inspecciones y ensayos de fugas**

Instalación sanitaria

Identificación de la zona

*(Página ..... de ..... páginas)*

Este documento es para certificar que se ha efectuado la inspección y el ensayo de fugas del sistema de canalización. A una presión de ensayo de 70 kPa el descenso de presión después de 15 min fue .....kPa (el máximo permitido es 10 kPa).

Instrumento(s) de medición utilizado(s)

**Representante del fabricante**

Puesto

Firma

Fecha

Nombre

**Persona autorizada**

Puesto

Firma

Fecha

Nombre

**Impreso C.3 – Inspección del marcado y de los intervalos de soporte del sistema de canalización**

Instalación sanitaria

Identificación de la zona

*(Página ..... de ..... páginas)*

Este documento es para certificar que se ha efectuado la inspección del marcado y de los intervalos de soporte del sistema de canalización. Se ha ensayado la indelebilidad del marcado y, si se ha utilizado, del código de color.

**Representante del fabricante**

Puesto

Firma

Fecha

Nombre

**Persona autorizada**

Puesto

Firma

Fecha

Nombre

**Impreso C.4 – Comprobación del funcionamiento mecánico y de la limpieza de las unidades terminales**

Instalación sanitaria

Identificación de la zona

*(Página ..... de ..... páginas)*

Este documento es para certificar que se ha comprobado el funcionamiento mecánico y se ha inspeccionado la limpieza de todas las unidades terminales.

**Representante del fabricante**

Puesto

Firma

Fecha

Nombre

**Persona autorizada**

Puesto

Firma

Fecha

Nombre

**Impreso C.5 – Ensayo de conexión cruzada**

Instalación sanitaria

Identificación de la zona

*(Página ..... de ..... páginas)*

Este documento es para certificar que se ha ensayado la conexión cruzada del sistema de canalización con cualquier otro sistema de canalización.

Instrumento(s) de medición utilizado(s)

**Representante del fabricante**

Puesto

Firma

Fecha

Nombre

**Persona autorizada**

Puesto

Firma

Fecha

Nombre

**Impreso C.6 – Ensayos del funcionamiento de los dispositivos de potencia**

Instalación sanitaria

Identificación de la zona

*(Página ..... de ..... páginas)*

Este documento es para certificar que se han ensayado todos los dispositivos de potencia conformes con los manuales y especificaciones del fabricante.

Instrumento(s) de medición utilizado(s)

**Representante del fabricante**

Puesto

Firma

Fecha

Nombre

**Persona autorizada**

Puesto

Firma

Fecha

Nombre

**Impreso C.7.1 – Ensayos del caudal de las unidades terminales tipo 1L del SEGA**

Instalación sanitaria

Identificación de la zona

(Página ..... de ..... páginas)

Este documento es para certificar que las unidades terminales tipo 1L del SEGA se han ensayado de conformidad con el apartado 8.2.2 con el aparato de ensayo 1/50, (descenso de presión 1 kPa, caudal máximo 50 l/min) y con el aparato de ensayo 2/25 (descenso de presión 2 kPa, caudal mínimo 25 l/min).

| Una unidad terminal en uso |                |                        |                        | ... unidades terminales en uso <sup>a</sup> |                |                        |                        |
|----------------------------|----------------|------------------------|------------------------|---------------------------------------------|----------------|------------------------|------------------------|
| Número unidad terminal     | Número de sala | Caudal medido          |                        | Número unidad terminal                      | Número de sala | Caudal medido          |                        |
|                            |                | Aparato de ensayo 1/50 | Aparato de ensayo 2/25 |                                             |                | Aparato de ensayo 1/50 | Aparato de ensayo 2/25 |
|                            |                |                        |                        |                                             |                |                        |                        |
|                            |                |                        |                        |                                             |                |                        |                        |
|                            |                |                        |                        |                                             |                |                        |                        |

<sup>a</sup> Número que se corresponde con el caudal de diseño del sistema de GAE.

Instrumento(s) de medición utilizado(s)

**Representante del fabricante**

Puesto

Firma

Fecha

Nombre

**Persona autorizada**

Puesto

Firma

Fecha

Nombre

**Impreso C.7.2 – Ensayos del caudal de las unidades terminales tipo 1H del SEGA**

Instalación sanitaria

Identificación de la zona

(Página ..... de ..... páginas)

Este documento es para certificar que las unidades terminales tipo 1H del SEGA se han ensayado de conformidad con el apartado 8.2.3 con el aparato de ensayo 1/80, (descenso de presión 1 kPa, caudal máximo 80 l/min) y con el aparato de ensayo 2/50 (descenso de presión 2 kPa, caudal mínimo 50 l/min).

| Una unidad terminal en uso |                |                        |                        | ... unidades terminales en uso <sup>a</sup> |                |                        |                        |
|----------------------------|----------------|------------------------|------------------------|---------------------------------------------|----------------|------------------------|------------------------|
| Número unidad terminal     | Número de sala | Caudal medido          |                        | Número unidad terminal                      | Número de sala | Caudal medido          |                        |
|                            |                | Aparato de ensayo 1/80 | Aparato de ensayo 2/50 |                                             |                | Aparato de ensayo 1/80 | Aparato de ensayo 2/50 |
|                            |                |                        |                        |                                             |                |                        |                        |
|                            |                |                        |                        |                                             |                |                        |                        |
|                            |                |                        |                        |                                             |                |                        |                        |

<sup>a</sup> Número que se corresponde con el caudal de diseño del sistema de GAE.

Instrumento(s) de medición utilizado(s)

**Representante del fabricante**

Puesto

Firma

Fecha

Nombre

**Persona autorizada**

Puesto

Firma

Fecha

Nombre

**Impreso C.7.3 – Ensayos de la presión de las unidades terminales tipo 2 del SEGA**

Instalación sanitaria

Identificación de la zona

*(Página ..... de ..... páginas)*

Este documento es para certificar que las unidades terminales tipo 2 se han ensayado de conformidad con el apartado 8.2.4 (caudal de ensayo 50 l/min, descenso de presión máximo 7,5 kPa).

| Una unidad terminal en uso |                |                | ... unidades terminales en uso <sup>a</sup> |                |                |
|----------------------------|----------------|----------------|---------------------------------------------|----------------|----------------|
| Número unidad terminal     | Número de sala | Presión medida | Número unidad terminal                      | Número de sala | Presión medida |
|                            |                |                |                                             |                |                |
|                            |                |                |                                             |                |                |
|                            |                |                |                                             |                |                |

<sup>a</sup> Número que se corresponde con el caudal de diseño del sistema de GAE.

Instrumento(s) de medición utilizado(s)

**Representante del fabricante**

Puesto

Firma

Fecha

Nombre

**Persona autorizada**

Puesto

Firma

Fecha

Nombre



**Impreso C.8 – Comprobación del sistema indicador**

Instalación sanitaria

Identificación de la zona

*(Página ..... de ..... páginas)*

Este documento es para certificar que se ha comprobado el funcionamiento apropiado del sistema indicador.

**Representante del fabricante**

Puesto

Firma

Fecha

Nombre

**Persona autorizada**

Puesto

Firma

Fecha

Nombre

**Impreso C.9 – Comprobación de la evacuación del sistema de eliminación de GAE**

Instalación sanitaria

Identificación de la zona

*(Página ..... de ..... páginas)*

Este documento es para certificar que se ha comprobado la evacuación del sistema de eliminación de GAE.

**Representante del fabricante**

Puesto

Firma

Fecha

Nombre

**Persona autorizada**

Puesto

Firma

Fecha

Nombre

**Impreso C.10 – Comprobación de la identificación y del etiquetado de las unidades terminales**

Instalación sanitaria

Identificación de la zona

*(Página ..... de ..... páginas)*

Este documento es para certificar que se ha comprobado la identificación y el etiquetado (del marcado y, si se ha utilizado, del código de color), y que se han retirado las etiquetas que indican que el sistema no se ha de utilizar.

**Representante del fabricante**

Puesto

Firma

Fecha

Nombre

**Persona autorizada**

Puesto

Firma

Fecha

Nombre

## **ANEXO D (Informativo)**

### **LISTA DE COMPROBACIÓN DE LA GESTIÓN DE RIESGOS**

#### **D.1 Generalidades**

La gestión de riesgos se debería efectuar conforme con la Norma Internacional ISO 14971.

Este anexo da el procedimiento de gestión de riesgos recomendado y la lista de comprobación utilizada para identificar la raíz de las causas y las situaciones peligrosas (es decir, la causa del peligro) relacionadas con los objetivos de seguridad definidos y las medidas de control de riesgos apropiadas para el sistema de eliminación de GAE.

Tanto el fabricante (F) del sistema de eliminación de GAE como el (los) representante(s) de la instalación sanitaria (H) deberían utilizar el procedimiento de gestión de riesgos y la lista de comprobación del control de riesgos durante:

- el diseño, la instalación, la puesta en servicio y el funcionamiento de los nuevos sistemas de eliminación de GAE;
- el funcionamiento y la supervisión en marcha de los sistemas existentes de eliminación de GAE.

#### **D.2 Procedimiento de gestión de riesgos**

Cuando se gestionan los riesgos asociados con los sistemas de eliminación de GAE, es necesario primero completar una evaluación del sistema global.

Una vez evaluados los riesgos (es decir, la combinación de la severidad y de la probabilidad de ocurrencia del daño), el diseño debería procurar mitigar los riesgos utilizando procedimientos en el orden siguiente de prioridad:

- a) un diseño inherentemente seguro;
- b) las medidas de protección en el propio producto sanitario o en el proceso de fabricación;
- c) la información para la seguridad.

#### **D.3 Lista de comprobación de la gestión de los riesgos**

Las tablas D.1 y D.2 dan una lista de los objetivos de seguridad, raíz de las causas, situaciones peligrosas y medidas de control de riesgos apropiadas típicas para mitigar el riesgo hasta niveles aceptables, e identifican a las organizaciones responsables de la acción.

Tabla D.1 – Lista de comprobación de la gestión de los riesgos – Sistemas con sopladores, ventiladores o bombas de vacío

| Objetivo de seguridad             | Raíz de la causa                                                                  | Situación peligrosa                                                                                                                                                 | Medidas de control de riesgos                                                                                                                                                                                                                                                                                                                                                                                                                                                                                                                                                                                            | Organizaciones responsables                        |
|-----------------------------------|-----------------------------------------------------------------------------------|---------------------------------------------------------------------------------------------------------------------------------------------------------------------|--------------------------------------------------------------------------------------------------------------------------------------------------------------------------------------------------------------------------------------------------------------------------------------------------------------------------------------------------------------------------------------------------------------------------------------------------------------------------------------------------------------------------------------------------------------------------------------------------------------------------|----------------------------------------------------|
| 1) Continuidad del funcionamiento | a) Bloqueo/bloqueo parcial de la canalización                                     | Pérdida o reducción del caudal                                                                                                                                      | Ensayos de caudal en cada unidad terminal antes del uso                                                                                                                                                                                                                                                                                                                                                                                                                                                                                                                                                                  | F                                                  |
|                                   | b) Pérdida de caudal y/o de presión del dispositivo de potencia en funcionamiento | Sistema suministrado desde el dispositivo de potencia secundario<br><br>Pérdida de caudal en todas las unidades terminales si fallan todos los sistemas             | Se asegura que se incluye un dispositivo de potencia secundario en el esquema de diseño del sistema de eliminación<br><br>Sistema de mantenimiento preventivo para cada montaje del dispositivo de potencia<br><br>Procedimientos operacionales establecidos para asegurar la continuidad del caudal para situaciones de emergencia<br><br>Ensayos de rutina del dispositivo de potencia secundario para asegurar su funcionamiento apropiado cuando falla el dispositivo de potencia primario<br><br>Ensayos de rutina del medio indicador<br><br>Que el documento de gestión operacional contemple el fallo del caudal | H + F<br><br>H<br><br>H<br><br>H<br><br>H<br><br>H |
|                                   | c) Ubicación/alojamiento inadecuado del dispositivo de potencia                   | Daño mecánico al dispositivo de potencia que origina pérdida de caudal<br><br>Dispositivo de potencia afectado por un incidente que implica a un edificio adyacente | Se asegura que las salas de la planta tienen control de temperatura y ventilación adecuados<br><br>Protección física adecuada frente al daño mecánico<br><br>Revisión de rutina de la ubicación del dispositivo de potencia para asegurar que el sistema permanece seguro                                                                                                                                                                                                                                                                                                                                                | H + F<br><br>H + F<br><br>H                        |
|                                   | d) Fallo del medio indicador                                                      | Condición anormal no detectada del dispositivo de potencia                                                                                                          | UPS (suministro de potencia ininterrumpido) para asegurar la continuidad de suministro eléctrico al sistema indicador<br><br>Ensayo de rutina del sistema indicador                                                                                                                                                                                                                                                                                                                                                                                                                                                      | H + F<br><br>H                                     |

| Objetivo de seguridad | Raíz de la causa                   | Situación peligrosa                                                                                            | Medidas de control de riesgos                                                                                                                                                                                                                                                                                                                                                                                                                                                                                                                                                                                                                                                                                                 | Organizaciones responsables          |
|-----------------------|------------------------------------|----------------------------------------------------------------------------------------------------------------|-------------------------------------------------------------------------------------------------------------------------------------------------------------------------------------------------------------------------------------------------------------------------------------------------------------------------------------------------------------------------------------------------------------------------------------------------------------------------------------------------------------------------------------------------------------------------------------------------------------------------------------------------------------------------------------------------------------------------------|--------------------------------------|
| e)                    | Fallo de la alimentación eléctrica | Fallo de funcionamiento de componentes eléctricos que origina la pérdida de caudal                             | UPS o alimentación eléctrica de emergencia para asegurar la continuidad de suministro eléctrico al sistema indicador<br>Se comprueba la capacidad del suministro eléctrico de emergencia<br>Ensayo de rutina del suministro eléctrico de emergencia<br>Que el documento de gestión operacional contemple los problemas del fallo del suministro eléctrico                                                                                                                                                                                                                                                                                                                                                                     | H<br>H<br>H<br>H                     |
|                       | f)                                 | Fallo del componente                                                                                           | Procedimiento para asegurar que se restablece la condición de funcionamiento de todos los componentes después del restablecimiento del suministro eléctrico normal<br>Revisión e identificación de los componentes críticos<br>Mantenimiento preventivo selectivo de los componentes críticos<br>Especificación de los componentes críticos suministrada por los proveedores aprobados<br>Indicación del medio de comprobación de rutina para asegurar que el dispositivo de potencia está funcionando conforme con las especificaciones del fabricante<br>Repuestos/redundancia adecuados para los componentes críticos<br>Que el documento de gestión operacional contemple los problemas del fallo de componentes críticos | H<br>H<br>H<br>H<br>H<br>H<br>H<br>H |
| g)                    | Fallo del sistema de mantenimiento | Ignición de componentes<br>Fallo potencial de los componentes y fallo subsiguiente del dispositivo de potencia | Que el documento de gestión operacional contemple los problemas del fallo de componentes críticos<br>Se asegura que el sistema de eliminación de GAE se utilice solamente con gases y vapores anestésicos según la especificación del fabricante<br>Que el documento de gestión operacional contemple los problemas del fallo de componentes críticos                                                                                                                                                                                                                                                                                                                                                                         | F + F<br>F<br>H<br>H<br>H<br>H       |

| Objetivo de seguridad                                                                                       | Raíz de la causa                                                                                                                                                                       | Situación peligrosa                                                                                                                                                                                                                                                              | Medidas de control de riesgos                                                                                                                                                                                                                                                    | Organizaciones responsables                                                                                                             |
|-------------------------------------------------------------------------------------------------------------|----------------------------------------------------------------------------------------------------------------------------------------------------------------------------------------|----------------------------------------------------------------------------------------------------------------------------------------------------------------------------------------------------------------------------------------------------------------------------------|----------------------------------------------------------------------------------------------------------------------------------------------------------------------------------------------------------------------------------------------------------------------------------|-----------------------------------------------------------------------------------------------------------------------------------------|
| 2) Prestaciones del sistema                                                                                 | a) Diseño/especificación incorrecta de los componentes y sistemas de la canalización                                                                                                   | Caudal inadecuado                                                                                                                                                                                                                                                                | Validación del diseño conforme con el capítulo 12<br>Comprobaciones de la puesta en servicio después de la instalación                                                                                                                                                           | F                                                                                                                                       |
|                                                                                                             |                                                                                                                                                                                        | Ignición de los componentes                                                                                                                                                                                                                                                      | Se proporciona información sobre la utilización<br>Que el documento de gestión operacional contemple las comprobaciones periódicas de la utilización                                                                                                                             | H + F                                                                                                                                   |
|                                                                                                             |                                                                                                                                                                                        |                                                                                                                                                                                                                                                                                  | Selección de los componentes para asegurar que son compatibles con los gases y vapores anestésicos según la especificación del fabricante                                                                                                                                        | H                                                                                                                                       |
|                                                                                                             |                                                                                                                                                                                        | b) Protección inadecuada frente a la corrosión de la canalización/los componentes                                                                                                                                                                                                | Fugas<br>Caída de los soportes                                                                                                                                                                                                                                                   | Que el documento de gestión operacional asegure que todos los repuestos utilizados sean compatibles con los gases y vapores anestésicos |
|                                                                                                             | Se corrige el diseño/protección de la canalización/los componentes<br>Que el documento de gestión operacional contemple la inspección y mantenimiento periódicos de las canalizaciones |                                                                                                                                                                                                                                                                                  |                                                                                                                                                                                                                                                                                  | F                                                                                                                                       |
|                                                                                                             | c) Reflujo de gases                                                                                                                                                                    | Caudal incorrecto del sistema colector                                                                                                                                                                                                                                           | Se corrige el diseño del sistema de eliminación de GAE para impedir el reflujo de los gases y vapores anestésicos al interior de las unidades terminales tipo 2                                                                                                                  | F                                                                                                                                       |
|                                                                                                             |                                                                                                                                                                                        |                                                                                                                                                                                                                                                                                  | Comprobaciones de la puesta en servicio para demostrar las prestaciones de cualquier medio que impida el reflujo                                                                                                                                                                 | H + F                                                                                                                                   |
|                                                                                                             | d) Conexiones cruzadas entre sistemas de canalización de gases medicinales o de vacío y el sistema de eliminación de GAE                                                               | Presión superior a la atmosférica en las canalizaciones del sistema de eliminación de GAE                                                                                                                                                                                        | Se corrige el diseño del sistema de eliminación de GAE para impedir las conexiones cruzadas                                                                                                                                                                                      | F                                                                                                                                       |
|                                                                                                             |                                                                                                                                                                                        |                                                                                                                                                                                                                                                                                  | Puesta en servicio del sistema de eliminación de GAE para demostrar la ausencia de conexiones cruzadas                                                                                                                                                                           | H + F                                                                                                                                   |
|                                                                                                             |                                                                                                                                                                                        |                                                                                                                                                                                                                                                                                  | Que el documento de gestión operacional contemple evitar las conexiones cruzadas cuando se modifica/amplia el sistema                                                                                                                                                            | H                                                                                                                                       |
| Se definen las responsabilidades para todo el personal/usuarios asociados del sistema de eliminación de GAE |                                                                                                                                                                                        |                                                                                                                                                                                                                                                                                  | H                                                                                                                                                                                                                                                                                |                                                                                                                                         |
| 3) Funcionamiento del sistema                                                                               | a) Funcionamiento o mantenimiento incorrecto del sistema de eliminación de GAE                                                                                                         | Formación para todo el personal/usuarios asociados del sistema de eliminación de GAE                                                                                                                                                                                             | Formación para todo el personal/usuarios asociados del sistema de eliminación de GAE                                                                                                                                                                                             | H + F                                                                                                                                   |
|                                                                                                             |                                                                                                                                                                                        | Que el documento de gestión operacional especifique la necesidad de evaluar la competencia de todo el personal/usuarios asociados del sistema de eliminación de GAE y que especifique los requisitos de formación continua. Se conservan los registros de la formación impartida | Que el documento de gestión operacional especifique la necesidad de evaluar la competencia de todo el personal/usuarios asociados del sistema de eliminación de GAE y que especifique los requisitos de formación continua. Se conservan los registros de la formación impartida | H                                                                                                                                       |

Tabla D.2 – Lista de comprobación de la gestión de los riesgos – Sistemas con eyector(es) accionados por aire comprimido

| Objetivo de seguridad             | Raíz de la causa                                                                                         | Situación peligrosa                                                    | Medidas de control de riesgos                                                                                                                                                                                                                                                                                                                                                                                                                                                                                                                                                       | Organizaciones responsables   |
|-----------------------------------|----------------------------------------------------------------------------------------------------------|------------------------------------------------------------------------|-------------------------------------------------------------------------------------------------------------------------------------------------------------------------------------------------------------------------------------------------------------------------------------------------------------------------------------------------------------------------------------------------------------------------------------------------------------------------------------------------------------------------------------------------------------------------------------|-------------------------------|
| 1) Continuidad del funcionamiento | a) Bloqueo/bloqueo parcial de la canalización                                                            | Pérdida o reducción del caudal                                         | Ensayos de caudal en cada unidad terminal antes del uso                                                                                                                                                                                                                                                                                                                                                                                                                                                                                                                             | F                             |
|                                   | b) Fallo del dispositivo de potencia                                                                     | Pérdida o reducción del caudal                                         | Programa de mantenimiento preventivo establecido para cada dispositivo de potencia<br>Procedimientos operacionales establecidos para las situaciones de emergencia para asegurar la continuidad de la evacuación<br>Ensayos de rutina de cada unidad terminal para asegurar que está funcionando conforme con las especificaciones del fabricante<br>Que el documento de gestión operacional contemple el fallo del dispositivo de potencia                                                                                                                                         | H                             |
|                                   | c) Pérdida de aire comprimido del sistema de eliminación de GAE o variación de su presión nominal/caudal | Pérdida o reducción del caudal                                         | Se proporcionan sistemas de alarma para el aire comprimido<br>Ensayos de rutina de los sistemas de alarma para el aire comprimido<br>Ensayos de rutina del medio indicador<br>Se comprueba la capacidad del sistema de suministro de aire comprimido del sistema de eliminación de GAE<br>Ensayos de rutina de cada unidad terminal para asegurar que está funcionando conforme con las especificaciones del fabricante<br>Que el documento de gestión operacional contemple los problemas del fallo del sistema de suministro de aire comprimido del sistema de eliminación de GAE | H<br>F + H<br>H<br>H<br>F + H |
|                                   | d) Pérdida de aire comprimido del sistema de eliminación de GAE o variación de su presión nominal/caudal | Pérdida o reducción del caudal                                         | Procedimiento para asegurar que se restablece la condición de funcionamiento de todos los componentes después del restablecimiento del suministro de aire comprimido<br>Procedimientos operacionales establecidos para las situaciones de emergencia para asegurar la continuidad del caudal al paciente                                                                                                                                                                                                                                                                            | H<br>H                        |
|                                   | e) Ubicación/alojamiento inadecuado del dispositivo de potencia                                          | Daño mecánico al dispositivo de potencia que origina pérdida de caudal | Protección física adecuada frente al daño mecánico                                                                                                                                                                                                                                                                                                                                                                                                                                                                                                                                  | H + F                         |



| Objetivo de seguridad | Raíz de la causa                                                                     | Situación peligrosa                                                                                  | Medidas de control de riesgos                                                                                                               | Organizaciones responsables |
|-----------------------|--------------------------------------------------------------------------------------|------------------------------------------------------------------------------------------------------|---------------------------------------------------------------------------------------------------------------------------------------------|-----------------------------|
|                       | f) Fallo del medio indicador                                                         | Condición anormal no detectada del dispositivo de potencia                                           | Ensayos de rutina del sistema indicador                                                                                                     | H                           |
|                       | g) Fallo del sistema de alarma del aire comprimido del sistema de eliminación de GAE | Pérdida o reducción no detectada de la presión del aire comprimido del sistema de eliminación de GAE | Ensayos de rutina de los sistemas de alarma para el aire comprimido                                                                         | H                           |
|                       | h) Fallo de un componente                                                            | Pérdida potencial o variación del caudal con fallo de los componentes críticos                       | Revisión e identificación de los componentes críticos<br>Mantenimiento preventivo selectivo para los componentes críticos                   | F<br>H + F                  |
|                       |                                                                                      |                                                                                                      | Especificación para los componentes críticos suministrada por los proveedores aprobados                                                     | F                           |
|                       |                                                                                      |                                                                                                      | Ensayos de rutina de cada unidad terminal para asegurar que está funcionando conforme con las especificaciones del fabricante               | H                           |
|                       |                                                                                      |                                                                                                      | Repuestos/redundancia adecuados para los componentes críticos                                                                               | H                           |
|                       |                                                                                      |                                                                                                      | Que el documento de gestión operacional contemple los problemas del fallo de componentes críticos                                           | H                           |
|                       | i) Fallo de un componente                                                            | Ignición de los componentes                                                                          | Selección de bomba(s) de vacío dedicada(s) (si existen) que sean compatibles con el oxígeno y los gases y vapores anestésicos               | F                           |
|                       |                                                                                      |                                                                                                      | Se asegura que el sistema de eliminación de GAE se utilice solamente con gases y vapores anestésicos según la especificación del fabricante | H                           |
|                       | j) Fallo del sistema de mantenimiento                                                | Fallo potencial de los componentes y fallo subsiguiente del dispositivo de potencia                  | Que el documento de gestión operacional contemple los problemas del fallo de componentes críticos                                           | H                           |

| Objetivo de seguridad       | Raíz de la causa                                                                                                         | Situación peligrosa                                                       | Medidas de control de riesgos                                                                                                                                                                                                                                                                                                                                                                                                                                                                                                                                                                                | Organizaciones responsables   |
|-----------------------------|--------------------------------------------------------------------------------------------------------------------------|---------------------------------------------------------------------------|--------------------------------------------------------------------------------------------------------------------------------------------------------------------------------------------------------------------------------------------------------------------------------------------------------------------------------------------------------------------------------------------------------------------------------------------------------------------------------------------------------------------------------------------------------------------------------------------------------------|-------------------------------|
| 2) Prestaciones del sistema | a) Diseño/especificación incorrecta de los componentes y sistemas de la canalización                                     | Caudal inadecuado                                                         | Validación del diseño conforme con el capítulo 12<br>Comprobaciones de la puesta en servicio después de la instalación<br>Se proporciona información sobre la utilización<br>Que el documento de gestión operacional contemple la inspección y el mantenimiento periódicos de las canalizaciones                                                                                                                                                                                                                                                                                                             | F<br>H + F<br>F + H<br>H      |
|                             | b) Protección inadecuada frente a la corrosión de las canalizaciones/los componentes                                     | Ignición de los componentes                                               | Selección de los componentes para asegurar que son compatibles con los gases y vapores anestésicos según las especificaciones del fabricante<br>Que el documento de gestión operacional asegure que todos los repuestos utilizados sean compatibles con los gases y vapores anestésicos                                                                                                                                                                                                                                                                                                                      | F<br>H + F                    |
|                             | c) Reflujo de gases                                                                                                      | Fallo de las canalizaciones/los componentes. Fugas. Caída de los soportes | Se corrige el diseño/protección de las canalizaciones/los componentes<br>Que el documento de gestión operacional contemple la inspección o el mantenimiento periódicos de las canalizaciones                                                                                                                                                                                                                                                                                                                                                                                                                 | F<br>H                        |
|                             | d) Conexiones cruzadas entre sistemas de canalización de gases medicinales o de vacío y el sistema de eliminación de GAE | Incorrecto suministra al paciente                                         | Se corrige el diseño del sistema de eliminación de GAE para impedir el reflujo de gases de eliminación hacia las unidades terminales tipo 1 y tipo 2<br>Comprobaciones de la puesta en servicio para demostrar las prestaciones de cualquier medio para impedir el reflujo<br>Se corrige el diseño del sistema de eliminación de GAE para impedir las conexiones cruzadas<br>Puesta en servicio del sistema de eliminación de GAE para demostrar la ausencia de conexiones cruzadas<br>Que el documento de gestión operacional contemple evitar las conexiones cruzadas cuando el sistema se modifica/amplía | F<br>H + F<br>F<br>H + F<br>H |
|                             | e) Contaminación del dispositivo de potencia con partículas visibles                                                     | Pérdida o reducción del caudal                                            | Validación del diseño conforme con el capítulo 12<br>Puesta en servicio del sistema de eliminación de GAE para demostrar la ausencia de partículas                                                                                                                                                                                                                                                                                                                                                                                                                                                           | F                             |

| Objetivo de seguridad                | Raíz de la causa                                                               | Situación peligrosa                                        | Medidas de control de riesgos                                                                                                                                                                                                                                                                                                                                                                                                                                                        | Organizaciones responsables |
|--------------------------------------|--------------------------------------------------------------------------------|------------------------------------------------------------|--------------------------------------------------------------------------------------------------------------------------------------------------------------------------------------------------------------------------------------------------------------------------------------------------------------------------------------------------------------------------------------------------------------------------------------------------------------------------------------|-----------------------------|
|                                      | f) Presión incorrecta del aire comprimido del sistema de eliminación de GAE    | Pérdida o reducción del caudal                             | Se corrige la especificación del diseño para asegurar la presión del aire comprimido<br>Puesta en servicio del sistema de eliminación de GAE para demostrar que los medios de control/regulación de la presión están funcionando conformes con las especificaciones del fabricante<br>Que el documento de gestión operacional contemple la inspección y el mantenimiento periódico de los medios de control/regulación de la presión                                                 | F<br><br>F + H<br><br>H     |
| <b>3) Funcionamiento del sistema</b> | a) Funcionamiento o mantenimiento incorrecto del SEGA                          | Pérdida o reducción del caudal<br>Fallo de los componentes | Se definen las responsabilidades para todo el personal/usuarios asociados del sistema de eliminación de GAE<br>Formación para todo el personal/usuarios del sistema de eliminación de GAE<br>Que el documento de gestión operacional especifique la necesidad de evaluar la competencia de todo el personal asociado/usuarios del sistema de eliminación de GAE y que especifique los requisitos de formación continua. Se conservan los registros de la formación impartida         | H<br><br>H + F<br><br>H     |
|                                      | b) Incompatibilidad del sistema de GAE con otros productos sanitarios          | Imposibilidad de uso o uso incorrecto                      | Se definen las características del producto previsto para conexión al sistema de eliminación de GAE antes de su compra<br>Se comprueba la compatibilidad antes del uso                                                                                                                                                                                                                                                                                                               | H<br><br>H                  |
|                                      | c) Funcionamiento o mantenimiento incorrecto del sistema de eliminación de GAE | Pérdida o reducción del caudal<br>Fallo de los componentes | Se definen las responsabilidades de todo el personal/usuarios asociados del sistema de eliminación de GAE<br>Formación para todo el personal/usuarios asociados del sistema de eliminación de GAE<br>Que el documento de gestión operacional especifique la necesidad de evaluar la competencia de todo el personal asociado/usuarios del sistema de eliminación de GAE y que especifique los requisitos de formación continua. Se conservan los registros de la formación impartida | H<br><br>H + F<br><br>H     |

## **ANEXO E (Informativo)**

### **JUSTIFICACIÓN**

Los apartados en este anexo se han enumerado para corresponder a los apartados en esta parte de la Norma Internacional ISO 7396 a los que se refieren.

**E.5.2 c)** Las bombas de vacío generan temperaturas altas en el proceso de compresión que pueden originar, en combinación con los gases y vapores anestésicos, incendios dentro de las bombas de vacío.

### **BIBLIOGRAFÍA**

- [1] ISO 4135 *Equipo respiratorio y de anestesia. Vocabulario.*
- [2] EN 740 *Estaciones de anestesia y sus módulos. Requisitos particulares.*
- [3] SS 01 91 02 *Colour Atlas.*
- [3] NFPA 99 Standard for Health Care Facilities, National Fire Protection Association, Quincy, MA.

**ANEXO ZA (Informativo)**

**CAPÍTULOS DE ESTA NORMA EUROPEA RELACIONADOS CON LOS REQUISITOS ESENCIALES  
U OTRAS DISPOSICIONES DE LA DIRECTIVA 93/42/CEE**

Esta norma europea ha sido elaborada bajo un Mandato dirigido a CEN por la Comisión Europea y por la Asociación Europea de Libre Comercio, para proporcionar un medio de dar cumplimiento a los requisitos esenciales de la Directiva 93/42/CEE.

Una vez que esta norma se cite en el Diario Oficial de la Unión Europea bajo esta directiva, y se implemente como norma nacional en al menos un Estado Miembro, el cumplimiento de los capítulos de esta norma indicados en la tabla ZA.1, dentro de los límites del campo de aplicación de esta norma, es un medio para dar presunción de conformidad con los requisitos esenciales específicos de esta directiva y los reglamentos de la AELC asociados.

**Tabla ZA.1 – Correspondencia entre esta norma europea y la Directiva 93/42/CEE**

| <b>Capítulos/Apartados de esta norma europea</b> | <b>Requisitos esenciales de la Directiva 93/42/CEE</b> | <b>Notas/Comentarios</b> |
|--------------------------------------------------|--------------------------------------------------------|--------------------------|
| 4.1                                              | 1                                                      |                          |
| 4.2                                              | 2                                                      |                          |
| 4.3                                              | 2                                                      |                          |
| 4.3.1                                            | 4, 7.1, 7.3, 9.2, 9.3                                  |                          |
| 4.3.2                                            | 4, 7.1, 7.3, 9.2, 9.3                                  |                          |
| 4.3.3                                            | 2                                                      |                          |
| 4.3.4                                            | 4, 7.1, 9.3                                            |                          |
| 4.3.5                                            | 4, 7.1, 7.3, 9.3                                       |                          |
| 4.3.6                                            | 5                                                      |                          |
| 5.1                                              | 1, 2, 3                                                |                          |
| 5.2                                              | 3, 9.3, 12.8.2                                         |                          |
| 5.3                                              | 3, 4                                                   |                          |
| 5.4                                              | 3, 4                                                   |                          |
| 5.5                                              | 9.2, 9.3                                               |                          |
| 5.6                                              | 9.2, 9.3                                               |                          |
| 6                                                | 2, 12.2, 12.3                                          |                          |
| 7                                                | 1, 2                                                   |                          |
| 7.1                                              | 2                                                      |                          |
| 7.2                                              | 2                                                      |                          |
| 8.1                                              | 1, 3, 9.1, 12.8.2                                      |                          |
| 8.2                                              | 1, 3, 9.1, 12.8.2                                      |                          |
| 9                                                | 9.1, 12.7.4                                            |                          |
| 10                                               | 13.2                                                   |                          |
| 11                                               | 1, 2, 3                                                |                          |
| 11.1                                             | 2                                                      |                          |

| Capítulos/Apartados de esta norma europea | Requisitos esenciales de la Directiva 93/42/CEE                 | Notas/Comentarios |
|-------------------------------------------|-----------------------------------------------------------------|-------------------|
| 11.2                                      | 9.2                                                             |                   |
| 11.3 – 11.11                              | 2, 9.2, 12.7.1                                                  |                   |
| 11.12                                     | 4, 7.2, 7.5                                                     |                   |
| 11.13                                     | 7.2, 7.5, 7.6                                                   |                   |
| 12                                        | 1, 2, 3                                                         |                   |
| 12.4.1                                    | 7.2, 7.5                                                        |                   |
| 12.4.2                                    | 9.2, 12.6, 12.7.1, 13.2                                         |                   |
| 12.4.3                                    | 9.1, 12.7.4                                                     |                   |
| 12.4.4                                    | 2, 3, 9.2                                                       |                   |
| 12.4.5                                    | 3, 12.8.2                                                       |                   |
| 12.4.6                                    | 3                                                               |                   |
| 12.4.7                                    | 2, 12.2, 12.3                                                   |                   |
| 12.4.8                                    | 4, 7.2, 7.5, 7.6                                                |                   |
| 12.4.9                                    | 9.1, 12.7.4                                                     |                   |
| 13                                        | 9.1, 13.1, 13.3 a), 13.3 i), 13.3 j), 13.6 a), 13.6 c), 13.6 d) |                   |

**ADVERTENCIA:** Los productos incluidos en el campo de aplicación de esta norma pueden estar afectados por otros requisitos o directivas de la UE.

**ANEXO NACIONAL (Informativo)**

Las normas europeas o internacionales que se relacionan a continuación, citadas en esta norma, han sido incorporadas al cuerpo normativo UNE con los códigos siguientes:

| <b>Norma Europea/Norma Internacional</b> | <b>Norma UNE</b>       |
|------------------------------------------|------------------------|
| EN 1041                                  | UNE EN 1041            |
| EN 13348                                 | UNE EN 13348           |
| ISO 5359                                 | UNE EN 739             |
| ISO 7396-1:2007                          | UNE EN ISO 7396-1:2007 |
| ISO 14971                                | UNE EN ISO 14971       |
| ISO 15001                                | UNE EN ISO 15001       |



---

---

**AENOR** Asociación Española de  
Normalización y Certificación

Dirección C Génova, 6  
28004 MADRID-España

Teléfono 91 432 60 00

Fax 91 310 40 32

Traductor

jueves, 11 de enero de 2018

# S90 FD-155

DE DICIEMBRE DE 2014

Por: AIR LIQUIDE MEDICINAL SL

ISSN 0335-3931

## FD S 90-155

Mayo de 2016

Índice de clasificación: **S 90-155**

ICS: 11.040.10

## Distribución para sistemas de gases medicinales comprimidos y vacío - complementos para el diseño y la recepción

E: tubería para gases medicinales comprimidos y vacío-  
Elementos adicionales para el diseño y entrega de la aceptación  
D: Rohrleitungen für medizinische und Vakuum Druckgase-  
Zusatzelemente für Konstruktion und Abnahme

### **Documento publicado**

Publicado por AFNOR.

Reemplaza el documento publicado FD S 90-155, diciembre de 2014..

**Correspondencia** En la fecha de publicación de este documento, no hay normalización europeos o internacionales trabajo tratan el mismo tema.

**Resumen** Este amplio documento de las norma UNE EN ISO 7396-1 sistemas distribución de gases medicinales principalmente en temas de cosecha por lugar de trabajo y el flujo y el método de dimensionamiento de tubos de vacíos integrando el concepto de pérdidas.

Este documento no proporciona todos los elementos para el dimensionamiento fuentes de gas médico comprimido, consulte el párrafo 5.2.1. de la norma NF EN ISO 7396-1. Para el caso particular de vacío, consulte los cuadros 1 y 1a y los capítulos 6.3 y 10.2 de este documento

**Descriptores de Técnica internacional tesauro:** distribución de gas, gas medicinal, gas comprimido, técnica de vacío, gasoducto, diseño, seguridad, recibo, conexión, pared, flujo, dimensión, diámetro, característica de construcción, presión, nivel, ajuste, cálculo, caída de presión, código de color, prueba, regulador, referencia a estándares, símbolo.

**Cambios** Comparado con el documento reemplazado, esta nueva edición incluye modificaciones relacionadas con el dimensionamiento de las tuberías y las pérdidas de carga en las redes de vacío, que se han ajustado en esta versión, así las modificaciones posteriores a la publicación de la norma NF EN ISO 7396-1: 2016, teniendo en cuenta la evolución con respecto a la versión anterior (edición de 2007).

## Correcciones

Publicado y distribuido por la Association Française de Normalisation (AFNOR) - 11 rue Francis de Pressensé - 93571 La Plaine Saint-Denis Cedex Tel.: + 33 (0) 1 41 62 80 00 - Fax: + 33 (0) 1 49 17 90 00

**La emisión de documentación**, diferencia de normas y experimental por su fundamentalmente informativa. Es **desarrollado por consenso** en una organización de normalización. El documento publicado está bajo revisión periódica para evaluar su pertinencia en el tiempo.

## Para entender los problemas de documentación

Se dibuja la atención del lector a los siguientes puntos:

- Debido a su carácter informativo, documento publicado no contiene ningún requisito.
- Expresiones tales como **se debe y se recomienda** se utilizan para expresar una posibilidad preferida pero no es obligatorio cumplir con este documento. Formas verbales **y puede** ser utilizado para expresar una sugerencia o un Consejo útil pero no es obligatorio o el permiso.
- Además, este documento puede proporcionar informativa adicional pretende facilitar la comprensión o el uso de algunos elementos o aclarar la aplicación, sin el requisito de estado cumplir. Estos elementos se presentan en forma de **notas o anexos informativa**.

## Comité de normalización

Un Comité de normalización reúne, en un determinado campo de actividad, los conocimientos necesarios para el desarrollo de las normas francesas y de las posiciones francesas en los proyectos europeos o internacionales. También puede preparar las especificaciones de la documentación y normas experimentales. **Si desea comentar este texto, hacer propuestas para cambiar o para participar en su revisión**, consulte < [norminfo@AFNOR.org](mailto:norminfo@AFNOR.org) >.

La composición del Comité de normalización que ha preparado el presente documento se expone a continuación. Cuando un experto representa una organización diferente de su organización matriz, esta información aparece en la forma: cuerpo de pertenencia (representado).

# **AFNOR S92D sistemas de tuberías de gases medicinales**

## **Composición de la Comisión de normalización**

Presidente: M SIMONDET

Secretaría: M THOMASSIN — AFNOR

|     |            |                                                     |
|-----|------------|-----------------------------------------------------|
| M   | AISSAOUI   | SOL FRANCE                                          |
| MME | ARGAUDD    | AIR PRODUCTS                                        |
| M   | AVONDO     | SOCOTEC FRANCE                                      |
| M   | BARTHELEMY | AIR LIQUIDE (AIR LIQUIDE SANTE FRANCE)              |
| M   | BESSON     | TONNOIR FLUIDES MEDICAUX                            |
| M   | CABY       | TLV TECHNIQUE LUMIERE VERNIER                       |
| M   | CHAFFARD   | AIR LIQUIDE MEDICAL SYSTEMS                         |
| M   | CHAUSSAT   | CAHOUE                                              |
| M   | DUPIF      | AIR LIQUIDE SANTE FRANCE                            |
| M   | FAGUET     | AIR PRODUCTS SA                                     |
| M   | FORTUIT    | ASSOCIATION FRANÇAISE DES GAZ COMPRIMEE             |
| M   | GENTIE     | MIL'S                                               |
| M   | LARDENAI   | CEODEUX SA                                          |
| MME | MALLET     | ARTELIA                                             |
| M   | MARCHAL    | AIR LIQUIDE SANTE INTERNATIONAL                     |
| MME | MARECHAL   | SETRHI SETAE (ARTELIA)                              |
| M   | PELTIER    | TLV TECHNIQUE LUMIERE VERNIER                       |
| M   | ROBLET     | MIL'S                                               |
| M   | SAGE       | MEDIGHAM                                            |
| M   | SIMONDET   | AIR LIQUIDE SANTE SERVICES (AL SANTE INTERNATIONAL) |
| MME | THERENE    | LINDE FRANCE — LINDE HEALTHCARE                     |
| M   | VOLLE      | SOL FRANCE                                          |
| MME | WAMBERGUE  | AIR LIQUIDE MEDICAL SYSTEMS                         |
| M   | ZAPATA     | LINDE HEALTHCARE                                    |
| M   | ZENOU      | NOVAIR                                              |

# Resumen

## Introducción

- 1      Ámbito de aplicación
- 2      Referencias normativas
- 3      Términos, definiciones y símbolos
- 3.1    Términos y definiciones
- 3.2    Símbolos
- 4      Tomas de corriente
- 5      Número de capturas y flujos
- 6      Otros elementos para las reglas de construcción
- 6.1    Sistemas de presión de dos etapas
- 6.2    Ajuste de presiones nominales
- 6.3    Flujo
- 6.4    Diámetros
- 6.4.1  Cálculo del diámetro de los gasoductos bajo presión
- 6.4.2  Cálculo del diámetro de las líneas de gas al vacío (vacío)
- 6.4.3  Pérdida de carga
- 6.4.4  Recomendaciones sobre tubos
- 6.5    Diseño de sistemas para vacío
- 6.6    Diseño de cierres
- 7      Código de color
- 8      Pruebas
- 8.1    Prueba de redes de vacío médico
- 8.2    Prueba e identificación de fluidos sin inversión
- 9      Duplicar los reguladores
- 9.1    General
- 9.2    Áreas de cuidado crítico
- 10     Fuentes
- 10.1   Fuentes de gases médicos comprimidos
- 10.2   Fuentes de suministro de vacío médico
- 10.3   Fuentes locales de emergencia
- 11     Tablero de monitoreo de gases médicos locales y recomendaciones Operando

- Apéndice A      Cálculos de diámetro / caída de presión
- Apéndice B      Cálculos de diámetros / pérdidas de carga
- B.1      Preselección del diámetro de la tubería vacía
- B.2      Ejemplos de aplicaciones
- Apéndice C      Fórmulas de cálculo
- C.1 Origen de la fórmula de "cálculo del diámetro"
- C.2 Supuestos utilizados
- C.3 Fórmulas para calcular las pérdidas de cargas

## Bibliografía

## INTRODUCCIÓN

La norma francesa UNE S 90-155, febrero de 1990, incluyó muchas especificaciones para el diseño de sistemas de distribución de gases medicinales: número mínimo de tomas por servicio, caudales y coeficientes de utilización asociados y otras reglas para el cálculo de construcción así como las especificaciones para la puesta en servicio.

Estas especificaciones fueron más en el estándar europeo EN 737 - 3:2000 que reemplazó el UNE S 90 - 155:1990. Debido a que servicios no podrían ser definidos a nivel europeo. La Comisión francesa, no quieren ver desaparecer estos elementos, había decidido actualizar y recopilar en un folleto de documentación nacional, publicado en agosto de 2001, como información adicional a la norma europea.

La publicación de la norma UNE EN ISO 7396-1 en el año 2007 (en reemplazo de la norma UNE EN 737-3) dio lugar a una revisión completa de la especificación S FD 90-155 especialmente en (temas de fuentes) y el doblaje de los reguladores.

Además la Comisión francesa de normalización S92D "sistemas de distribución de gases medicinales" deseados, teniendo en cuenta la experiencia adquirida desde la publicación de la versión anterior de esta especificación, revisar las tablas de localización de toma por servicio y de caudales.

La edición 2012 contiene enmiendas relativas a la fuente de producción del vacío.

Esta edición incluye las modificaciones relativas a las dimensiones de las tuberías, teniendo en cuenta las pérdidas de carga.

## 1- AMBITO DE APLICACION

Este documento ofrece elementos para el diseño y puesta en marcha de sistemas de distribución de gases medicinales y vacío, complementario a los de la norma UNE EN ISO 7396-1.

Este documento no proporciona todos los elementos para el tamaño de las fuentes de gases medicinales comprimidos, consulte el apartado 5.2.1 de la la NF EN ISO 7396-1.

Para el caso particular del vacío se refieren a las tablas 1 y 1bis y capítulos 6.3 y 10.2 de este documento.

## 2- REFERENCIAS NORMATIVAS

Los siguientes documentos referenciados son indispensables para la aplicación de este documento. Para referencias fechadas, se aplica únicamente la edición citada. Para las referencias sin fecha, se aplica la última edición del documento referenciado (incluyendo cualquier enmienda).

**NF S 90 - 116:1988**, *equipo quirúrgico - pared y tarjetas que emparejan para los fluidos médicos.*

**FD S 90 - 119:2006**, *salidas para sistemas de gases medicinales - tomados de aire de pared para instrumentos quirúrgicos y consejos relevantes.*

**NF EN 13348:2008**, *de cobre y cobre aleaciones - inconsútiles redonda de cobre para gases medicinales o vacío (índice de clasificación: un 51-127).*

**NF EN ISO 4135:2001**, *equipo anestésico y respiratorio - vocabulario (índice de clasificación: 95-100 S).*

**NF EN ISO 5359**, *manguera a baja presión para utilización con gases medicinales (índice de clasificación: S 95-174), sustitución de la norma UNE EN 739:1998 (una enmienda no es admitir las conexiones NIST y SIS en el plan europeo).*

**NF EN ISO 7396-1: 2007** (reemplazo de la UNE EN 737 - 3:2000), *sistemas de tuberías de gases medicinales — parte 1: distribución de gases medicinales comprimidos y vacío (índice de clasificación: S 95-155).*

**NF EN ISO 9170-1:** 2008, *toma de pared para sistemas de tuberías de gases medicinales — parte 1: toma de pared para gases medicinales comprimidos y vacío (índice de clasificación: S-95-162-1) (reemplazando el UNE EN 737 - 1:1998).*

**NF EN ISO 11197,** *ejes para uso médico (índice de clasificación: S 95-164).*

Monografías de la Farmacopea Europea sobre gases medicinales con 'aire medicinal (corregido por 2000 y 1998).

**Decreto de 22 de octubre de 1982** (do del 03 de noviembre de 1982) en materia de dispositivos de seguridad para aparatos de gas médico.

**Orden de 23 de diciembre de 1988** (DOUE de 30 de diciembre de 1988) con la aplicación obligatoria de las normas.

**Circular DGS / 3 A/667bis de 10 de octubre de 1985** (banda sonora del Ministerio de salud 85-51 de 22 de enero de 1986) referente a la distribución de gases para uso médico y la creación de una Comisión local de vigilancia de esta distribución

**Circular no. 146 de 21 de marzo de 1966** sobre el uso seguro de gases medicinales.

**Decretos del código de la salud pública** (DOUE de 20 de julio de 2005):

- D 6124-1 a 26 (transporte de emergencia)
- D 6124-27-34 (resucitación)
- D 6124-104 a 118 (reanimación)

**Orden de 07 de enero de 1993** (do del 15 de enero de 1993) relativos a las características operativa del sector de la que se refiere el artículo días 712-31 del código de salud pública para estructuras utilizando anestesia cirugía ambulatoria que se refiere el artículo r. 712-2-1 (b) del código.

**Decreto del 03 de octubre de 1995** (do del 13 de octubre de 1995) relativos a los términos y condiciones de uso y control de materiales y dispositivos médicos, garantizando las funciones y los actos enumerados en el artículo D 712-43 y d. 712-47 del código de salud pública (anestesia).

**DH/EM1 ministerial circular no. 963059 del 17 de junio de 1996** relativa a la seguridad de los dispositivos médicos. Uso de ventiladores y mezcladores de gas utilizado para la anestesia, reanimación y neonatal.

**Decreto de 10 de diciembre de 2004** (do del 22 de enero de 2005) aprobar disposiciones que complementa y modifica Reglamento de seguridad contra incendios y riesgos de pánico en establecimientos que reciben público (blogs U).

**Referencia no regulada:** comentarios de la delegación COPREC fuego seguridad (antes CLOPSI) en abril de 2008 el Decreto de 10 de diciembre de 2004 que modifica el Reglamento de seguridad incendio en instalaciones de atención médica reciben público blogs U.

### **3- TÉRMINOS, DEFINICIONES Y SÍMBOLOS**

#### **3.1 TÉRMINOS Y DEFINICIONES**

Para los propósitos de este documento, los siguientes términos y definiciones dadas en las normas NF EN ISO 7396-1 y NF EN ISO 4135, así como los términos y definiciones aplican.

##### **3.1.1 Estación de cuidado**

Lugar donde un paciente y sólo uno está conectado al sistema de distribución

##### **3.1.2 Válvula de zona médica**

Válvula de bloqueo de la unidad de cuidados (válvula de zona como se define en la norma EN ISO 7396-1) interrumpiendo alimentación todas tomas de servicio. Se define el límite entre la parte primaria y secundaria de red, incluyendo vacío

##### **3.1.3 Pasillo de circulación**

acceder a distintos locales y piezas, después del área de la válvula médica (servicio médico) excluyendo salidas de alimentación del ramal.

### 3.2 SÍMBOLOS

Se recomienda para sistemas médicos utilizar los símbolos debajo:

Nota 1 "EUM" (entrada de emergencia mantenimiento = viejo VSP).

Nota 2 El símbolo de gas debería aparecer en las tuberías de redes secundarias en cada cambio dirección o cada uno tocando si la escala del plano lo permite.

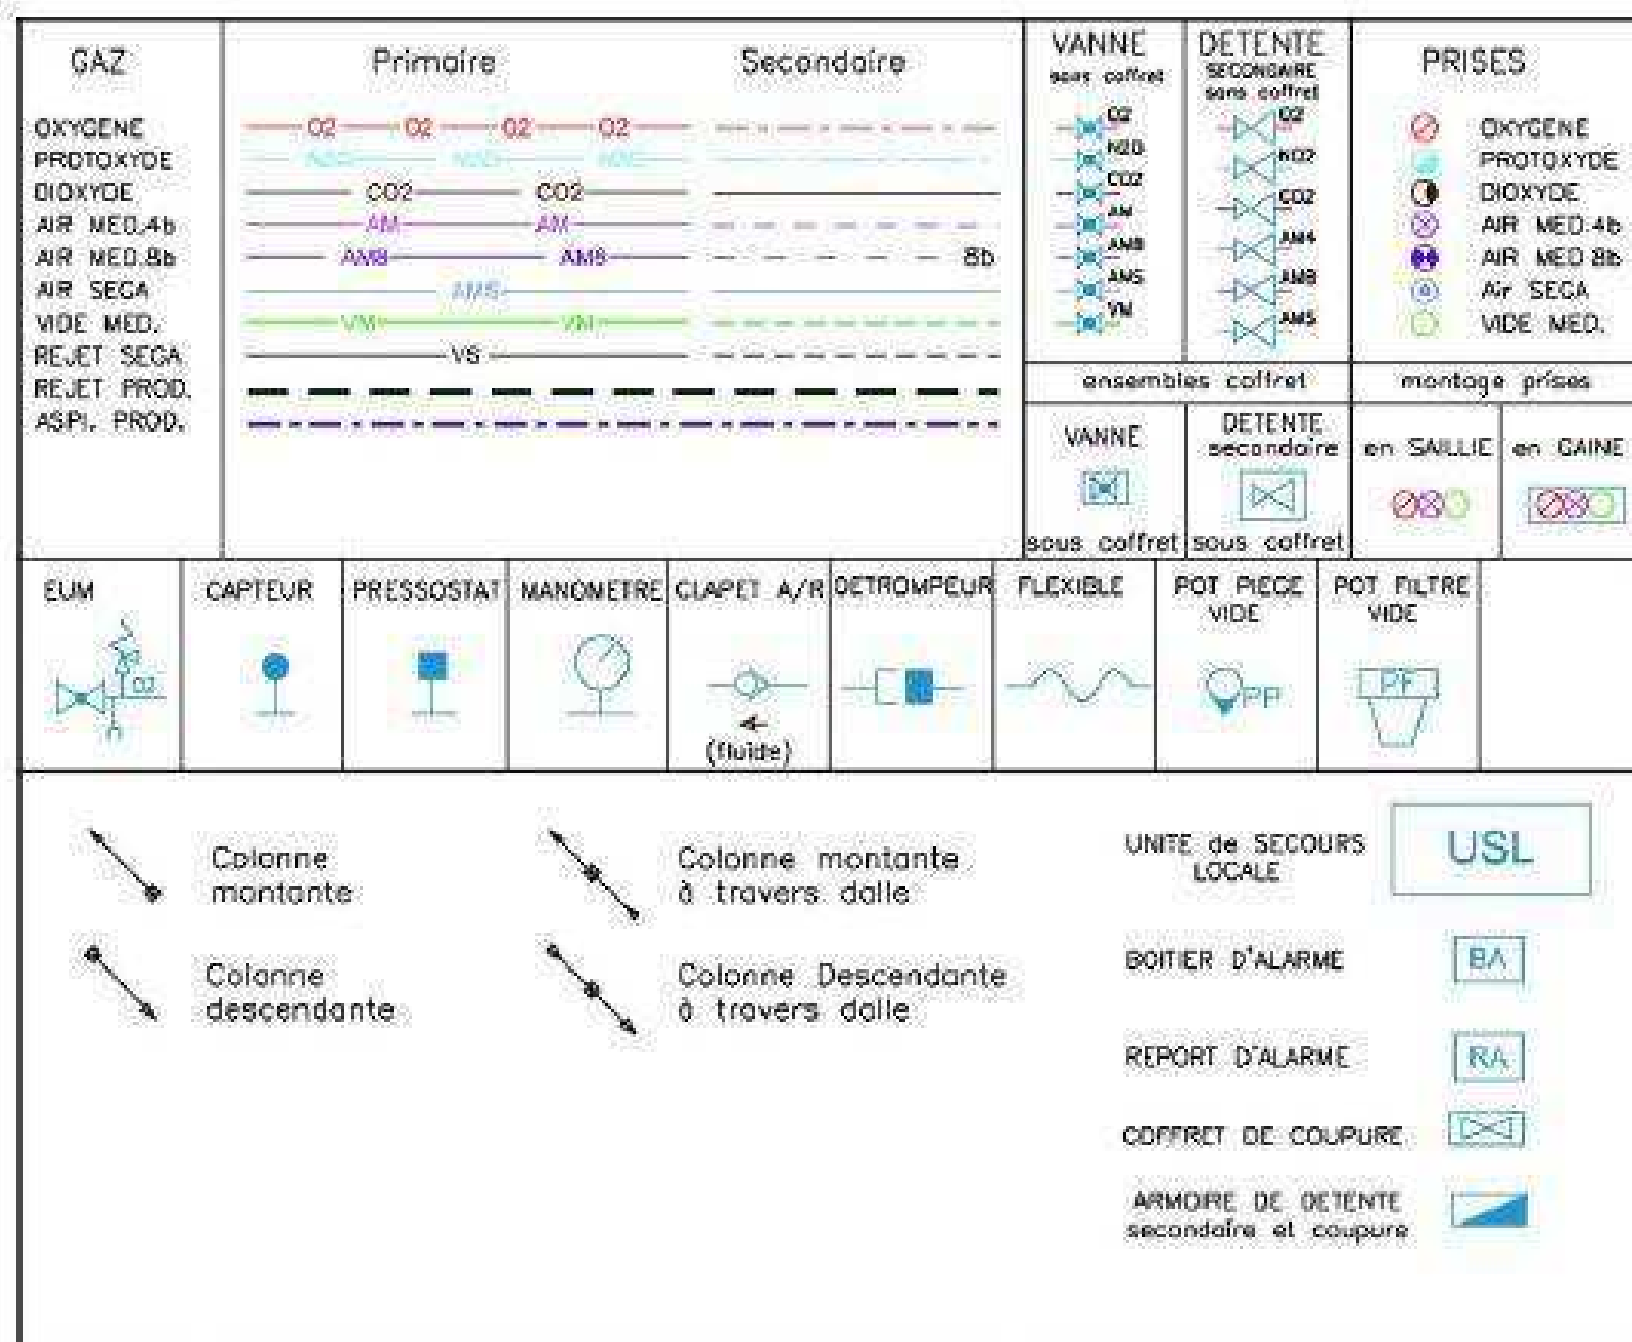

Figura 1 - símbolos y leyendas para el plan de sistemas de fluidos médicos

### 4- TOMAS DE PARED

Las tomas de pared deben ajustarse a las normas NF EN ISO 9170-1 y NF S 90-116 para la descripción de las muescas (así como el FD S 90-119 de aire motor). Por razones de seguridad, la norma francesa NF S 90-116 se ha hecho aplicación obligatoria (orden de 22 de octubre de 1982 y la orden de 23 de octubre de 1988).

El término "tomas de pared" utiliza tanto en la estandarización y regulación se define como sigue (NF EN ISO 4135): "conexión salida (o entrada de vacío) en un sistema de distribución de gases medicinales por el que el operador puede conectar y desconectar dispositivos.



Es por lo tanto ambas capturas en la pared y coge de un brazo móvil o fijo. La tabla 1 muestra el número mínimo de tomas de pared por puesto; Si hay cada "n" puesto/cama, el número de tomas es por lo tanto multiplicar por n».

La fabricación de una red de distribución de gases para uso médico, en cumplimiento de los requisitos normativos y reglamentarios, requiere pruebas y una aceptación definitiva hasta tomas de gas médico o en su defecto en las teclas instalado aguas arriba de cada equipo.

En el caso de la instalación de conductos de fluidos médicos dicen "cabeceros" (ver NF EN ISO 11197 sobre los ejes) o tallos (o columnas de techo) estacionario dotado como enchufes médicos del gas, se recomienda un solo fabricante para el sistema de distribución y los conductos internos a la envoltura incluyendo enchufes médicos del gas incorporados reservas previstas.

Donde el fabricante del sistema de distribución sería no responsable para la conducción de tuberías de la vaina interna y enchufes médicos del gas, es necesario prever la implementación de interfaces que define el límite de la responsabilidad de cada fabricante en todos los puntos de conexión para definir una interfaz que se identifica perfectamente entre los fabricantes (por ejemplo , uso de llave, válvula o etiqueta de lote (indicando el nombre del fabricante y su número de certificación) en cada lado del punto de conexión.

## **5- NÚMERO DE TOMAS Y CAUDALES**

Se recomienda que el número de tomas por servicio y los caudales son consistentes con los de las tablas 1 y 1bis.

A menos que se indique lo contrario por el cuerpo médico aprobado por la junta local de monitoreo de gases medicinales, el número de tomas y caudal obtenidos para una posición se estima suficiente para la actividad. Así, si además se solicitan nuevas salidas, no es necesario acumular los flujos más allá de valores ' flujo por puesto'

Si el uso de aire médico para el instrumento de secado está autorizado por la norma NF EN ISO 7396-1 § 5.5.1.2, Se debe prestar especial atención a las altas tasas de flujo de ciertos dispositivos, para gabinetes de secado endoscópico. Este tipo de gabinete conectado al aire médico provoca el consumo es probable que ponga en peligro toda la red de aire médica destinada principalmente para el paciente. En el momento del estudio y antes de que se coloque dicho dispositivo, la Comisión de gases médicos debe llevar a cabo un análisis de riesgos comprobando en particular que los consumos planificados pueden ser absorbido por la instalación de aire médico en su lugar. Si este no es el caso, 3 soluciones son posibles:

- estar equipado con un armario de secado de endoscopio que incorpora su propio compresor de aire;
- reemplazar la fuente de producción de Air Médical con una nueva fuente adaptada a las nuevas necesidades;
- instalación de una fuente de aire médica reservada exclusivamente para el secado de endoscopios.

## Tabla 1 – Equipamiento de tomas de gases medicinales por puesto de hospitalización y dimensionamiento del sistema de distribución

*% de tiempo: porcentaje promedio de uso o de funcionamiento: es el coeficiente de utilización correspondiente a la probabilidad de uso simultáneo de las tomas del mismo tipo.*

*Caudal unitario: es el caudal unitario instantáneo en litros normales por minuto (a presión atmosférica).*

*Caudal nominal por puesto: La suma de todos los caudales unitarios(en litros normales por minuto) por posición da caudal de diseño como se define en la norma NF EN ISO 7396-1. Esto permite dimensionar el tamaño de las líneas de distribución de acuerdo a las Tablas A1 y B1 de este documento.*

| Tipo de cama o puesto<br>(ver tabla anexa a continuación) | Oxígeno medicinal    |                        |             |                                  | Aire medicinal       |                        |             |                                  | Vacío medicinal      |                        |             |                                  | Observaciones          |
|-----------------------------------------------------------|----------------------|------------------------|-------------|----------------------------------|----------------------|------------------------|-------------|----------------------------------|----------------------|------------------------|-------------|----------------------------------|------------------------|
|                                                           | No. Tomas por puesto | Caudal Unitario NI/min | % de tiempo | Caudal nominal por puesto NI/min | No. Tomas por puesto | Caudal Unitario NI/min | % de tiempo | Caudal nominal por puesto NI/min | No. Tomas por puesto | Caudal Unitario NI/min | % de tiempo | Caudal nominal por puesto NI/min |                        |
| Puesto o cama tipo A                                      | 1                    | 10                     | 10          | 1                                | 1                    | 30                     | 10          | 3                                | 1                    | 24                     | 5           | 1.2                              | Ver notas 1 y 5        |
| Puesto o cama tipo B                                      | 1                    | 10                     | 20          | 2                                | 1                    | 30                     | 10          | 3                                | 1                    | 24                     | 15          | 3.6                              | Ver notas 2, 4 y 5     |
| Puesto o cama tipo C                                      | 1                    | 10                     | 20          | 2                                | 1                    | 15                     | 20          | 3                                | 2                    | 24                     | 20          | 9.6                              | Ver notas 3, 4 y 5     |
| Puesto o cama tipo D                                      | 2                    | 20                     | 40          | 16                               | 1                    | 15                     | 30          | 4.5                              | 3                    | 24                     | 20          | 14.4                             | Véanse las notas 4 y 5 |
| Puesto o cama tipo E                                      | 2                    | 60                     | 60          | 72                               | 2                    | 30                     | 60          | 36                               | 3                    | 24                     | 73          | 52.5                             | Véanse las notas 4 y 5 |

NOTA 1: Instalación de toma de aire medicinal en caso de terapia con aerosoles en cama tipo A.

NOTA 2: Toma de N2O opcional en el caso de radiología intervencionista. Para los caudales, consultar Tabla 1 bis. En este caso, la toma de N2O debe asociarse con una toma tipo SEGA.

NOTA 3: Para servicios de ORL, puede ser necesario tener dos tomas O2 por puesto.

NOTA 4: El uso de un sistema de drenaje y / o aspiración con válvula de interruptor de vacío para la regulación debe seguir las instrucciones del fabricante a fin de no causar un colapso de la red de vacío

NOTA 5: 24 NI/min = 40 l/min a 60 kPa (-400 mbar)

**Tabla apéndice camas y posiciones por tipo, agrupadas por necesidad de fluidos médicos**

| Puesto o cama tipo A                  | Puesto o cama tipo B                                                                                                                                            | Puesto o cama tipo C        | Puesto o cama tipo D            | Puesto o cama tipo E                       |
|---------------------------------------|-----------------------------------------------------------------------------------------------------------------------------------------------------------------|-----------------------------|---------------------------------|--------------------------------------------|
| Cama de Geriátrica                    | Cama de medicina especializada (Neumología, cardiología y diálisis)                                                                                             | Cama de cirugía general     | Cama de cirugía cardio-torácica | Cama de reanimación pesada                 |
| Cama de medicina                      | Cama de atención                                                                                                                                                | Cama de Cirugía visceral    | Sala de reanimación             | Cama de cuidados intensivos quirúrgicos    |
| Cama de medio y largo hospitalización | Maternidad cama madre o hijo                                                                                                                                    | Cama de cirugía ambulatoria | Cama de reanimación neonatal    | Cama de reanimación versátil               |
|                                       | Camas de Pediatría                                                                                                                                              | Cama de cirugía obstétrica  | Cama de reanimación médica      | Cama grandes quemados                      |
|                                       | Cama de atención ambulatoria                                                                                                                                    | Cama de cirugía ORL         |                                 | Cama cuidados intensivos pesado            |
|                                       | Sala de esfuerzo                                                                                                                                                | BOX de urgencias            |                                 | Cuarto estéril                             |
|                                       | Sala imagen médica no intervencionista, por ejemplo, radiología, scanner, resonancia magnética, mamografía, ecografía, angiografía, estereografía, cámara gamma | Cama supervisión continua   |                                 | Cama de cuidados intensivos de Cardiología |
|                                       | Paciente espera en radiología                                                                                                                                   | Cama de quemados            |                                 |                                            |
|                                       | Consulta, atención y sala exámenes                                                                                                                              |                             |                                 |                                            |

### Tabla 1bis - Equipamiento de tomas de gases medicinales por puesto de hospitalización y dimensionamiento del sistema de distribución (1/2)

*% de tiempo: porcentaje promedio de uso o de funcionamiento: es el coeficiente de utilización correspondiente a la probabilidad de uso simultáneo de las tomas del mismo tipo.*

*Caudal unitario: es el caudal unitario instantáneo en litros normales por minuto (a presión atmosférica).*

*Caudal nominal por puesto: La suma de todos los caudales unitarios(en litros normales por minuto) por posición da caudal de diseño como se define en la norma NF EN ISO 7396-1. Esto permite dimensionar el tamaño de las líneas de distribución de acuerdo a las Tablas A1 y B1 de este documento.*

| Bloque quirúrgico, ambulatorio, obstétrico y locales anexos                                        | Oxígeno medicinal   |                        |             |                                  | Protóxido de nitrógeno medicinal |                        |             |                                  | Aire medicinal      |                        |             |                                  | Vacío medicinal     |                        |             |                                  |
|----------------------------------------------------------------------------------------------------|---------------------|------------------------|-------------|----------------------------------|----------------------------------|------------------------|-------------|----------------------------------|---------------------|------------------------|-------------|----------------------------------|---------------------|------------------------|-------------|----------------------------------|
|                                                                                                    | No.Tomas por puesto | Caudal Unitario NI/min | % de tiempo | Caudal nominal por puesto NI/min | No.Tomas por puesto              | Caudal Unitario NI/min | % de tiempo | Caudal nominal por puesto NI/min | No.Tomas por puesto | Caudal Unitario NI/min | % de tiempo | Caudal nominal por puesto NI/min | No.Tomas por puesto | Caudal Unitario NI/min | % de tiempo | Caudal nominal por puesto NI/min |
| Sala polivalente, ortopedia, visceral, ORL, cesárea, laparoscopia obstetricia, cirugía ambulatoria | 2                   | 20                     | 50          | 20                               | 1                                | 10                     | 100         | 10                               | 2                   | 15                     | 50          | 15                               | 3                   | 24                     | 73          | 52.5                             |
| Sala de endoscopia, colonoscopia y GeV                                                             | 1                   | 15                     | 50          | 7.5                              | 1                                | 10                     | 10          | 1                                | 1                   | 15                     | 20          | 3                                | 2                   | 24                     | 15          | 7.2                              |
| Sala de cirugía cardiaca, vascular y coronaria                                                     | 3                   | 20                     | 100         | 60                               | 1                                | 10                     | 100         | 10                               | 2                   | 15                     | 50          | 15                               | 3                   | 24                     | 73          | 52.5                             |
| Cama despertar o SSPI                                                                              | 1                   | 15                     | 50          | 7.5                              |                                  |                        |             | 0                                | 1                   | 15                     | 20          | 3                                | 2                   | 24                     | 20          | 9.6                              |
| Puesto de inducción                                                                                | 1                   | 20                     | 50          | 10                               | 1                                | 10                     | 100         | 10                               | 1                   | 15                     | 50          | 7.5                              | 2                   | 24                     | 10          | 4.8                              |
| Sala de parto, pre-trabajo                                                                         | 2                   | 10                     | 50          | 10                               |                                  |                        |             | 0                                | 1                   | 10                     | 20          | 2                                | 3                   | 24                     | 15          | 10.8                             |
| Sala bebé, postnatal, incubadora                                                                   | 1                   | 10                     | 10          | 1                                |                                  |                        |             | 0                                | 1                   | 10                     | 10          | 1                                | 2                   | 24                     | 10          | 4.8                              |
| Cuarto de lavado, descontaminación y puesto secado instrumental                                    |                     |                        |             | 0                                |                                  |                        |             | 0                                |                     |                        |             | 0                                |                     |                        |             | 0                                |

**Tabla 1bis - Equipamiento de tomas de gases medicinales por puesto de hospitalización y dimensionamiento del sistema de distribución (2/2)**

| Bloque quirúrgico, ambulatorio, obstétrico y locales anexos                                       | Aire de motor para instrumentos quirúrgicos |                        |             |                                  | Aire para toma SEGA |                        |             |                                  | Vacío para toma SEGA |                        |             |                                  | CO2medicinal        |                        |             |                                  |
|---------------------------------------------------------------------------------------------------|---------------------------------------------|------------------------|-------------|----------------------------------|---------------------|------------------------|-------------|----------------------------------|----------------------|------------------------|-------------|----------------------------------|---------------------|------------------------|-------------|----------------------------------|
|                                                                                                   | No.Tomas por puesto                         | Caudal Unitario NI/min | % de tiempo | Caudal nominal por puesto NI/min | No.Tomas por puesto | Caudal Unitario NI/min | % de tiempo | Caudal nominal por puesto NI/min | No.Tomas por puesto  | Caudal Unitario NI/min | % de tiempo | Caudal nominal por puesto NI/min | No.Tomas por puesto | Caudal Unitario NI/min | % de tiempo | Caudal nominal por puesto NI/min |
| Sala polivalente, ortopedia, visceral, ORL, cesárea, laparoscopia obstétrica, cirugía ambulatoria | 1                                           | 250                    | 20          | 50                               | 1                   | 40                     | 100         | 40                               | 1                    | 90                     | 100         | 90                               | 1                   | 10                     | 20          | 2                                |
| Sala de endoscopia, colonoscopia y GeV                                                            |                                             |                        |             | 0                                | 1                   | 40                     | 10          | 4                                | 1                    | 90                     | 10          | 9                                |                     | 10                     | 20          | 2                                |
| Sala de cirugía cardiaca, vascular y coronaria                                                    | 1                                           | 250                    | 20          | 50                               | 1                   | 40                     | 100         | 40                               | 1                    | 90                     | 100         | 90                               |                     | 10                     | 20          | 2                                |
| Cama despertar o SSPI                                                                             |                                             |                        |             | 0                                |                     |                        |             | 0                                |                      |                        |             | 0                                |                     |                        |             | 0                                |
| Puesto de inducción                                                                               |                                             |                        |             | 0                                | 1                   | 40                     | 50          | 20                               | 1                    | 90                     | 50          | 45                               |                     |                        |             | 0                                |
| Sala de parto, pre-trabajo                                                                        |                                             |                        |             | 0                                |                     |                        |             | 0                                |                      |                        |             | 0                                |                     |                        |             | 0                                |
| Sala bebé, postnatal, incubadora                                                                  |                                             |                        |             | 0                                |                     |                        |             | 0                                |                      |                        |             | 0                                |                     |                        |             | 0                                |
| Cuarto de lavado, descontaminación y puesto secado instrumental                                   | 1                                           | 40                     | 50          | 20                               |                     |                        |             | 0                                |                      |                        |             | 0                                |                     |                        |             | 0                                |

Nota 1: Será usado aire SEGA o vacío SEGA pero no ambas tecnologías en las mismas salas. Cabe recordar que si se usa vacío SEGA, la producción de vacío SEGA debe ser diferente de la de vacío medicinal según párrafo 5.7.12 de la norma NF EN ISO 7396-1.

Nota 2: Toma de CO2 opcional

Nota 3: Para el secado de instrumentos, es posible utilizar una red secundaria dedicada, alimentada por aire medicinal.

Nota 4: En el caso de tomas que se alimenten con un flexible (ejemplo brazo móvil), estos dispositivos deben asegurarse en caso de fallo (rotura o aplastamiento de la manguera por ejemplo). Instalar válvula de corte en el flexible y la instalación de tomas en pared para garantizar la continuidad del suministro. El número de las mismas debe ser como mínimo las descritas la tabla 1 y 1bis del presente documento.

Nota 5: La monografía de la Farmacopea Europea "aire médico" se corresponde con el aire médico citado en la NF EN ISO 7396-1. La calidad del aire motor de aparatos quirúrgicos, de aire de secado instrumental y el aire SEGA para la evacuación de gas anestésico es la misma que la del aire medicinal.

Nota 6: No es posible utilizar en la habitación de parto y nacimiento las tomas de N2O para lograr una mezcla analgésica. Si es necesario, se deben utilizar botellas de drogas listo O2/N2O 50/50

Nota 7 24 NI/min = 40 l/min a 60 kPa (-400 mbar)

## **6- OTROS ELEMENTOS PARA LAS REGLAS DE CONSTRUCCIÓN**

### **6.1 SISTEMAS A DOS NIVELES DE PRESIÓN**

La norma francesa NF S 90-155 (1990), reemplazada ahora por la ISO 7396-1, hizo obligatorios sistemas doble reducción (ahora llamado "a dos niveles de presión").

Para mantener la consistencia y seguridad de redes (uso de botellas de emergencia y para el mantenimiento por ejemplo), es deseable que se mantenga el principio de la operación a dos niveles de presión.

Además, el sistema en dos niveles de presión para reducir las variaciones de presión en el uso con respecto a las variaciones en la red principal y la operando bajo condiciones normales.

Dos niveles de presión permiten una mejor sectorización de los servicios (por ejemplo, en incidentes o mantenimiento, el aislamiento y la aplicación de la ayuda en los servicios se facilita).

### **6.2 AJUSTE DE LA PRESIÓN NOMINAL**

Se recomienda en el espíritu de la circular ministerial DH/EM1 no. 963059, 17 de junio de 1996, que en la red secundaria la presión de oxígeno sea mayor que la presión del aire medicinal, y esta superior a la de protóxido de nitrógeno. Es deseable tener una diferencia de presión de 0,3 bar entre cada gas:

- 4.8 bar de oxígeno;
- 4.5 bar para aire medicinal;
- 4.2 barra para el óxido nitroso;
- 8 bar para aire para instrumentos quirúrgicos;

para evitar el riesgo de retrocontaminación con disminución del porcentaje de oxígeno por rotura de la válvula antirretorno.

En el mismo espíritu se recomienda para los servicios de Neonatología, que la presión de aire medicinal sea mayor que la presión de oxígeno como:

- 4.8 bar para aire medicinal;
- 4.5 bar de oxígeno;

para evitar el riesgo de inhalación de oxígeno al 100% (riesgo de toxicidad ocular) recién nacido en caso de rotura válvula antirretorno.

Se recomienda también estandarizar las presiones nominales de servicio de los sistemas de distribución de las tomas existentes, siguiendo las indicaciones anteriores.

### **6.3 CAUDALES**

En el diseño, prescriptores y usuarios futuros deben trabajar juntos para validar el número de tomas por servicio y / o el uso local; el número mínimo deberá cumplir con las tablas 1 y 1 bis.

## **6.4 DIÁMETROS**

### **6.4.1 Cálculo del diámetro de las líneas de gases a presión**

El diámetro de las líneas de gases a presión se determina mediante la fórmula C1 definida en los anexos A y C de este documento.

Para gases medicinales a presión, es recomendable limitar la velocidad a 15 m/s en las redes primarias y secundarias.

Existen dos ventajas por esto:

- reducción de pérdidas de carga en línea;
- mejor seguridad con el oxígeno y el óxido nitroso, especialmente al reducir el sobrecalentamiento.

La tabla A.1 (ver anexo A) permite para cada diámetro interior de tubo conocer el caudal máximo admisible.

### **6.4.2 Cálculo del diámetro de las líneas de gases bajo depresión (vacío)**

En el vacío, la velocidad puede alcanzar 25 m/s y debe tenerse en cuenta en la fórmula sobre depresión teórica de 0,5 bar por debajo de la presión atmosférica, es decir, una presión absoluta de 0,5 bar. Una vez determinado el diámetro según la tabla B.1 adjunta en el anexo B, es esencial para calcular las pérdidas de carga de acuerdo con el capítulo 6.4.3 de la norma y los anexos B y C de este documento.

Las tuberías de las circulaciones y elevadores del pasillo deben tener un diámetro constante para garantizar el flujo de habitaciones o servicios conectados.

### **6.4.3 Pérdida de carga**

#### **6.4.3.1 Pérdidas en redes de gases medicinales**

El principio de la distribución en dos niveles de presión permite no tomar en cuenta las pérdidas de carga para las aplicaciones previstas en la NF EN ISO 7396-1.

#### **6.4.3.2 Pérdidas en sistemas de vacío**

Para nuevas instalaciones o ampliaciones de la red existente, es esencial tener en cuenta las pérdidas de carga de las redes de vacío para satisfacer los requisitos de rendimiento técnico capítulo 7.2.4 de la norma NF EN ISO 7396-1. En relación con esta norma, la depresión en la toma no puede ser inferior a 60 kPa (600 mbar absoluta / mbar-400 relativa).

Para las tuberías de vacío la pérdida de carga está relacionada con la distancia y cambios de dirección (codos, tes, derivaciones) requiere aplicar los elementos de las fórmulas F3, F5 y F6, dada en el anexo del presente documento para el dimensionamiento de la red de vacío.

El cálculo de la pérdida de carga se debe realizar con una depresión media de 50 kPa (-500 mbar relativos); Este nivel corresponde con el nivel medio de depresión con relación a los valores previstos en la toma y en la fuente de acuerdo a la norma NF EN ISO 7396-1.

La pérdida de carga máxima autorizada por cálculo debe cumplir las siguientes condiciones:

- 10 kPa (100 mbar) entre la toma final y la válvula de sectorización del servicio (red secundaria) **Y**
- 25 kPa (250 mbar) entre la toma final y la válvula de bloqueo de la línea principal (en la fuente).

El cálculo de la caída de presión se realizará en la sección más desfavorable (la posición más alejada o correspondiente al flujo más grande). Para calcular la pérdida de carga de este artículo, es necesario tener en cuenta el caudal unitario multiplicado por el número de tomas por puesto, como se establece en las tablas 1 y 1bis del documento actual y sin aplicar el coeficiente de expansión.

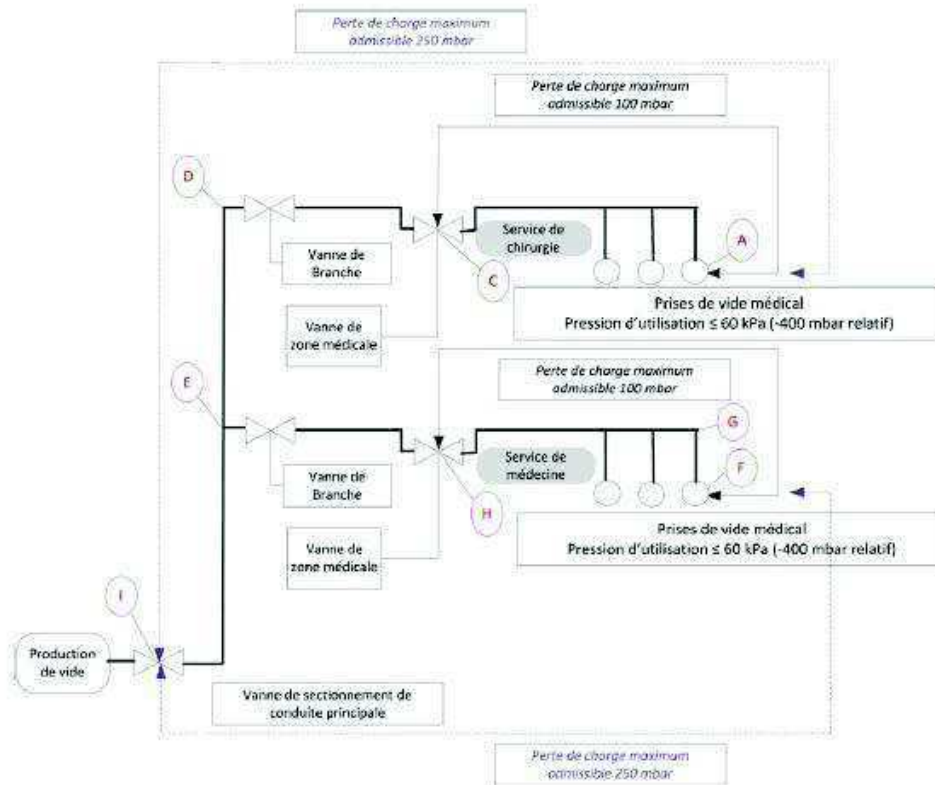

**Figura 2 - Diagrama del principio de cálculo de las pérdidas en carga del vacío**

Después de determinar el diámetro de la tubería de acuerdo con la tabla B.1 de este documento se debe tener en cuenta la pérdida de carga teórica por curvas o fórmulas referidas de la tabla B.2 en el Apéndice B. El diámetro se ajustará según la longitud total. El apéndice B de este documento presenta los pasos a seguir para determinar el diámetro de cada sección.

#### **6.4.3.3 Concepto de longitud equivalente y pérdidas de carga**

Las pérdidas de carga representan la caída de presión total debido a diversas fricciones inevitables experimentadas por un fluido en movimiento y generalmente se expresan en pascales.

Las pérdidas de carga se relacionan directamente con la velocidad del fluido y deben distinguir dos tipos de pérdidas:

- las pérdidas de carga supuestas 'lineales o regulares' son debido a la fricción del fluido en las paredes de los conductos.
- las pérdidas de carga por decir 'singulares' son debidas a las diferentes singularidades de la red (desvíos, curvas, reducciones, etc.).

La pérdida de carga total es la suma de las pérdidas lineales e inusuales.

Las pérdidas de carga "Lineal" se determinan según la longitud, diámetro y velocidad del gas. Para establecer la pérdida total, las pérdidas de cargas singulares deben tenerse en cuenta. Cada accesorio (te, codos, derivación, etc.) de la tubería es sustituido por una longitud recta del mismo diámetro, donde la pérdida por fricción es equivalente a la pérdida de carga de este accesorio.

Estos tramos rectos se añaden a la longitud real del tubo. El resultado es una longitud ficticia a la que aplica la teoría general de la pérdida de carga lineal por fricción.

Para simplificar los cálculos de la longitud a tener en cuenta, se incluirá en el coeficiente de pérdida de presión lineal, un aumento en la longitud de:

- 5% para diámetro interior < 26
- 10% para diámetro interior > 26

para tener en cuenta la longitud equivalente generada por las pérdidas de carga singulares.

#### **6.4.4 Las recomendaciones en los tubos**

Se recomienda el uso de tubos y accesorios de cobre, entregado de fábrica desengrasado y cerrado herméticamente, 1 mm de espesor (más fácilmente maleable de 0,8 mm y no requiere necesariamente la instalación de codos fabricados con operaciones de soldadura), de acuerdo con la norma NF EN ISO 13348.

Se recomienda ensamblar los tubos por soldadura capilar, cuyo contenido la aleación mínima es del 40% de plata sin cadmio (menos del 0,01% en peso de aleaciones). En este marco, las aleaciones de plata utilizadas deben cumplir al menos con el Ag 140 de NF EN ISO 17672.

Para el vacío es posible utilizar, más allá del diámetro interior 50 mm, tubos de presión de PVC que cumplan con requisitos mínimos M1 o Bs2d0 o polietileno de alta densidad para redes enterradas. En el diseño del sistema de vacío, no se instalará manguito apaga fuego en el cruce de muros, para tuberías de más de 125 mm de diámetro para asegurar la continuidad de suministro de vacío médico esencial para los pacientes altamente dependientes.

Se recomienda que la distancia entre los tubos de oxígeno y las líneas de combustible sea la notificada en la versión de la norma NF S 90 - 155:1990: "Los tubos de oxígeno deben estar separados de cualquier tubería de combustible gaseoso o líquido. La distancia entre los dos tipos de tuberías no debe en principio ser menos de 1 m. No obstante, un cruzamiento o cercanía en una longitud corta puede ser permitido en caso de necesidad. El cruzamiento o la cercanía debería estar fuera de conductos estrechos o mal ventilados y la línea de combustible debe estar siempre a una distancia de al menos 30 mm de la de oxígeno, bajo las condiciones establecidas por las reglas del artículo".

Para el espaciado con las redes eléctricas hay que respetar § 11.1.2 del NF EN ISO 7396-1:2007. Esta recomendación no concierne a las redes que corren débiles (baja tensión). Si todas las condiciones más arriba no pueden ser satisfechas, la canalización debe estar colocada bajo funda continua que asegura el mismo Nivel de seguridad.

#### **6.5 DISEÑO DE SISTEMAS DE VACÍO**

Cabe recordar que el apartado 5.7.3 de la norma UNE EN ISO 7396-1:2007 establece que: " cuando el sistema de suministro de vacío se compone de más de tres bombas, pudiendo ser conmutadas entre las diferentes fuentes de alimentación con el fin de disponer de una capacidad apropiada, deben estar dispuestas de modo que, durante el mantenimiento de una bomba o de un componente del sistema y durante la condición del primer fallo de cualquier componente (por ejemplo sistema de control) las otras



bombas y componentes deben poder abastecer el caudal de diseño con el fin de garantizar la continuidad de la alimentación".

La arquitectura y el pilotaje del sistema deben ser validados por un análisis de riesgo. Conviene tener un solo sistema de control de las bombas.

Además, cuando una instalación contiene varias bombas de vacío implantadas en diferentes locales, una canalización de un diámetro que sea suficiente para satisfacer el conjunto del caudal de diseño de la instalación debe unir la totalidad de las fuentes de producción.

## **6.6 DISEÑO DE ANILLOS**

Los anillos deben garantizar todas las necesidades de todo el diseño de servicios conectados al mismo.

Con el fin de evitar todo riesgo durante las operaciones, los seccionamientos de las redes de gases medicinales y de vacío pueden limitarse a los seccionamientos de los pies y/o de las montantes.

Si el establecimiento de salud y/o el diseñador desea colocar otros seccionamientos estos deben obligatoriamente ser validados por la comisión local de vigilancia de los gases médicos.

## **7- CÓDIGO DEL COLOR**

En el pasado el código de color del vacío era verde. Desde 1998 es amarillo el color del vacío según norma NF EN ISO 5359.

En el caso de ampliación y renovación de un sistema de distribución, es conveniente utilizar el color amarillo para toda la red de vacío médico.

## **8- PRUEBAS**

### **8.1 PRUEBAS DE SISTEMAS DE VACÍO MÉDICO**

Para la prueba de integridad mecánica de las redes de vacío a la presión 5 bar se recomienda no someter a esta prueba a tanques y dispositivos sensibles a la presión (sensores, vacuostatos, frascos, etc.).

Para pruebas de rendimiento, verificación de cálculos teóricos de este documento se considera suficiente la norma NF EN ISO 7396-1 capítulo 12.6.6.

### **8.2 PRUEBAS DE NO INVERSIÓN DE LOS FLUIDOS E IDENTIFICACIÓN**

Para respetar C.3.3 "prueba de inversión" y 12.6.16 "pruebas de identidad del gas" de la norma NF EN ISO 7396-1, le es recomendado al fabricante repetir el método de prueba de la circular 146 de 1966 (para la no inversión) que comienza con una prueba inicial de ausencia de gas sobre todas las tomas finales, con todas las alimentaciones de las redes de gas cortadas. Nos aseguramos así que ninguna toma final presenta gas.

Después, se abre una sola red por ejemplo oxígeno. Verificamos que únicamente las tomas de oxígeno presentan presión y la ausencia de presión sobre la totalidad de las otras tomas. La identificación positiva del gas se hace con análisis del porcentaje de oxígeno sobre la toma más próxima y más alejada de las canalizaciones situadas después de la válvula de zona, debe ser realizada o con la ayuda de un dispositivo de tipo paramagnético (cf. Farmacopea europea) o electroquímico (habiéndose ocupado de contrastarlo el mismo día sobre una botella de oxígeno medicinal) para los gases oxígeno y aire. No se debe recurrir a la prueba de la llama por razones de seguridad.

Luego, efectuamos sucesivamente lo mismo para las otras tomas de gas (del más oxidante al menos oxidante): Protóxido de nitrógeno, luego aire, luego dióxido de carbono si llega el caso.

Si por lo menos dos gases no oxigenados (protóxido de nitrógeno, dióxido de carbono, nitrógeno) son canalizados en el mismo sector, es imperativo completar la prueba de ausencia de oxígeno por otra prueba discriminante.

Es recomendado que en el momento de la recepción por el establecimiento según la circular Del 10 de octubre de 1985, el farmacéutico del establecimiento y otros miembros designados por la comisión local de vigilancia de los gases medicinales, procedan por su parte a las pruebas de identificación en presencia o no del fabricante. Los medios técnicos utilizados para la identificación pueden ser los descritos más arriba o los de la farmacopea europea, por ejemplo la prueba a la llama (vapores rojos) para el protóxido de nitrógeno en ausencia de analizador infrarrojo y aparición de precipitado blanco con agua de cal para el dióxido de carbono. Pruebas correspondientes por tubos colorimétricos son posibles.

## **9 DUPLICACIÓN DE REGULADORES**

### **9.1 GENERALIDADES**

El párrafo 7.4.1 de la norma NF EN ISO 7396-1 requiere una duplicación de los reguladores de presión con dos posibilidades alternativas descritas en A.29 y A.30. La solución debe ser compatible con la normativa contra incendios (artículo U) y en particular existirá sola válvula de corte aguas arriba de los reguladores:

- a) en el caso de la solución A.29 se recomienda que una de las válvulas normalmente esté cerrada para evitar un fallo simultáneo en los dos reguladores;
- b) en el caso de la solución A.30 el regulador de presión (artículo 18 de la NF EN ISO 7396-1) puede ser cerrada excepto en áreas de alimentación de pacientes altamente dependientes.

### **9.2 ÁREAS DE CUIDADOS CRÍTICOS**

La norma NF EN ISO 7396-1 en 4.4.1, establece que en el momento de la concepción, o en el momento de el desarrollo del programa de trabajo, debe tenerse en cuenta las necesidades de los pacientes de alimentación altamente dependiente.

En Francia, la continuidad del suministro en áreas críticas se reflejan en:

- a) funcionamiento 24 h/24 h;

Decretos del código de la salud pública (DOUE de 20 de julio de 2005):

- D 6124-1 a 26 (transporte de emergencia);
  - D 6124-27-34 (resucitación);
  - D 6124-104 a 118 (resucitación);
- b) Orden de 07 de enero de 1993 (do del 15 de enero de 1993) para la anestesia y cirugía ambulatoria;
  - c) Decreto del 03 de octubre de 1995 (do del 13 de octubre de 1995) para la anestesia.

Estas disposiciones (pedidos en 1993 y 1995) la aplicación dispositivos emergencia de proximidad según el esquema A 30 para pacientes altamente dependientes en el sentido del § 3.16 de la norma UNE EN ISO 7396-1 (ver las camas de tipo D y E y el bis de mesa quirúrgica 1) que permiten responder a las exigencias de la NF EN ISO 7396-1 7.4.1. Estos dispositivos son tomados en cuenta por reglamento contra incendios (artículo 54 de la U).

Un procedimiento de emergencia y capacitación del personal deben ser asociadas con la implementación de estos dispositivos.

## 10- FUENTES

### 10.1 FUENTES DE GASES MEDICINALES COMPRIMIDOS

Para el tamaño de las fuentes de gases comprimidos se debe consultar el apartado 5.2.1 de la NF EN ISO 7396-1.

**Recordatorio: las tablas 1 y 1bis están diseñadas para dimensionar sólo las redes de distribución de gases comprimidos.**

Las recomendaciones en 5.2.5 d) de NF EN ISO 7396-1, no se aplican a plantas de gas tabletas médicas si el local está equipado con una detección de incendios. El párrafo 5.8.2 de la norma NF EN ISO 7396-1 prevé la instalación de un detector de concentración de oxígeno para centrales instaladas dentro de un edificio. Esto no se aplica a las centrales de vacío y aire medicinal. Para las centrales de CO<sub>2</sub> también es necesario monitorear el nivel de oxígeno, y el nivel de CO<sub>2</sub> para la seguridad del personal. En este caso, el umbral de la alarma se encuentra 1.5% de CO<sub>2</sub> con la evacuación de este umbral en el aire ambiente. El (los) sensor (es) debe (n) estar instalados a una altura de 1,00 m para los sensores de oxígeno y a 0,5 m para los sensores de CO<sub>2</sub>. Se debe instalar una advertencia sonora y visual (baliza o flash) en la entrada exterior de la sala.

Además de estas disposiciones, se debe colocar una muestra informativa de los riesgos (hipoxia, anoxia, etc.) en el exterior de la puerta de acceso a la habitación.

### 10.2 FUENTES DE SUMINISTRO DE VACÍO MÉDICO

Para el tamaño de las fuentes de vacío médico, debe aplicarse un factor al rendimiento teórico obtenido con las tablas y fórmulas de los apartados 5 y 6.

Este coeficiente se obtiene de la ley del gas ideal:

$$P_{\text{tomas}} \cdot Q_{\text{tomas}} = P_{\text{Mini red}} \cdot Q_{\text{central de vacío}}$$

Con:

- P tomas es la presión atmosférica = 1.013 mbar;
- P Mini red es igual a 600 mb absoluta (-400 mbar relativos).

El resultado es:

$$Q_{\text{central de vacío}} = Q_{\text{tomas}} \cdot P_{\text{tomas}} / P_{\text{Mini red}} = Q_{\text{tomas}} \cdot 1013/600 = 1,688 \cdot Q_{\text{tomas}} = \mathbf{1,69} \cdot Q_{\text{tomas}}$$

Se recomienda aplicar un coeficiente de **1,69** para calcular la fuente de vacío. Así el flujo de cada fuente de vacío será **1,69** veces superiores a la calculada para el dimensionamiento de la red de vacío que derivan de las tablas 1 y 1bis del presente documento.

### 10.3 FUENTES LOCALES DE SEGURIDAD

Para el oxígeno, el aire medicinal y vacío pueden haber fuentes de seguridad para el suministro de pacientes altamente dependientes en el sentido del § 3.16 de la norma NF EN ISO 7396-1 (véase las camas D y E de la sala de operaciones), en modo degradado como se define en los procedimientos de emergencia.

Estos procedimientos de emergencia y no los datos de las tablas 1 y 1bis de este documento deben definir especial referencia los flujos y los porcentajes de uso o extensión de cada posición.

Estos dispositivos de emergencia deben tener la capacidad de suministro de acuerdo a procedimientos de emergencia.

No parece razonable tener autonomía de menos de 30 min (mínimo de realimentación de instalación o reabastecimiento del gas).

Las disposiciones reglamentarias para la prevención y protección contra incendios (artículo U 10 § 4) hacen condiciones obligatorias para la instalación de los equipos de rescate. El decreto del 10 de diciembre de 2004 (Gaceta Oficial del 22 de enero de 2005) modifica la regulación de la seguridad contra los riesgos de Incendios en los edificios públicos y establece nuevas disposiciones sobre el cuidado (tipo U). las observaciones de la Delegación COPREC Seguridad contra Incendios (antes CLOPSI) en abril de 2008 del Decreto de 10 de diciembre 2004 indican la precisión Condiciones de aplicaciones

## **11- COMISIÓN LOCAL DE SUPERVISIÓN DE GASES MÉDICOS Y RECOMENDACIONES DE USO**

La Comisión local de supervisión de gases médicos debe verificar:

- El diseño del sistema de distribución y, en particular:
  - Los análisis de riesgos del sistema de distribución (ver anexo F de la UNE EN ISO 7396 - 1);
  - Los análisis de riesgos de cierres de tuberías.
- Los análisis de riesgo de los iUNEormes de alarmas (consulte el Apéndice F de la UNE EN ISO 7396 - 1);
- La gestión operativa del sistema de distribución (ver Apéndice G de la UNE EN ISO 7396 - 1);
- El etiquetado de redes especialmente en vacío (tubos y tomas) debido al cambio de código de color con el paso del verde al amarillo;
- El ajuste de las presiones de todo el sistema existente y nuevo de gases medicinales según las presiones recomendadas en 6.2;
- La recepción final obligatoria incluso para una extensión menor.
- Los análisis de riesgo del uso de aire para el secado de instrumentos (ver § 5 de este documento).

**Apéndice A**  
(normativa)  
**Cálculos de diámetros / pérdidas**

**GASES MÉDICOS A PRESIÓN**

Este anexo es parte integrante del presente fascículo de documentación.

**La fórmula a utilizar es la fórmula F.1 que se describe en el Apéndice C:**

$$D = 18,9 \sqrt{\frac{Q_r}{V_u \cdot P_u}} \quad (\text{Fórmula B.1})$$

$Q_r$  Caudal medido a la temperatura y la presión de referencia (P.atm y 15°C) → Nm<sup>3</sup>/h

$v_u$  Velocidad del gas → m/s

$D$  Diámetro interno → mm

$P_u$  Presión absoluta de utilización → bar abs

Tabla A.1 : La tabla ha sido actualizada según la fórmula y da una primera aproximación caudal práctico máximo por diámetro.

Para gases medicinales bajo presión, es recomendable limitar la velocidad a 15 m/s en las redes primarias y secundarias.

**Tabla 2 - tipo práctico máximo de gases bajo presión**

| Diámetro interior tubería (mm) | Caudal de gas máximo                                                                          |                                                                                          |                                                                                   |                                                                              |
|--------------------------------|-----------------------------------------------------------------------------------------------|------------------------------------------------------------------------------------------|-----------------------------------------------------------------------------------|------------------------------------------------------------------------------|
|                                | Red primaria<br>$P_r = 9$ bar relativo<br>( $P_u = 10$ bar absolutos)<br>(Nm <sup>3</sup> /h) | Red secundaria<br>$P_r = 4$ bar en<br>( $P_u = 5$ bar absolutos)<br>(Nm <sup>3</sup> /h) | Red primaria<br>$P_r = 9$ bar relativo<br>( $P_u = 10$ bar absolutos)<br>(NL/min) | Red secundaria<br>$P_r = 4$ bar en<br>( $P_u = 5$ bar absolutos)<br>(NL/min) |
| 8                              | —                                                                                             | 13.5                                                                                     | —                                                                                 | 224.5                                                                        |
| 10                             | 42.0                                                                                          | 21.1                                                                                     | 700.8                                                                             | 350.8                                                                        |
| 12                             | 60.5                                                                                          | 30.3                                                                                     | 009,1 1                                                                           | 505,2                                                                        |
| 14                             | 82.4                                                                                          | 41.3                                                                                     | 1 373.5                                                                           | 687,7                                                                        |
| 16                             | 107.6                                                                                         | 53.9                                                                                     | 1 794,0                                                                           | 898,2                                                                        |
| 18                             | 136.2                                                                                         | 68,2                                                                                     | 2 270.5                                                                           | 1 136,7                                                                      |
| 20                             | 168.2                                                                                         | 84.2                                                                                     | 2 803,1                                                                           | 1 403.4                                                                      |
| 26                             | 284.2                                                                                         |                                                                                          | 4 737,3                                                                           | —                                                                            |
| 30                             | 378.4                                                                                         | —                                                                                        | 6 307,0                                                                           | —                                                                            |
| 40                             | 672.7                                                                                         | —                                                                                        | 11 212.5                                                                          | —                                                                            |
| 50                             | 1 051,2                                                                                       | —                                                                                        | 17 519,5                                                                          | —                                                                            |
| 60                             | 1 513.7                                                                                       | —                                                                                        | 25 228.0                                                                          | —                                                                            |
| 70                             | 060,3 2                                                                                       | —                                                                                        | 34 338.1                                                                          | —                                                                            |
| 80                             | 2 691.0                                                                                       | —                                                                                        | 44 849,8                                                                          | —                                                                            |
| 90                             | 3 405.8                                                                                       | —                                                                                        | 56 763,0                                                                          | —                                                                            |
| 100                            | 4 204.7                                                                                       | —                                                                                        | 70 077,8                                                                          | —                                                                            |

Nota 1  $P_r$  = presión relativa.  
 Nota 2 sistemas de tuberías están sujetas a la Directiva 97/23/CE europea sobre equipos a presión.  
 Más allá de los 20/22 de diámetro, es necesario, en el momento del diseño, comprobar el impacto de la presente Directiva.

## Apéndice B

### (normativa)

### Cálculos de diámetros / pérdidas

#### VACÍO MÉDICO

Este anexo es parte integrante del presente fascículo de documentación.

#### B.1 Preselección del diámetro de la tubería de vacío

La preselección del diámetro no debe exceder una velocidad de 25 m/s y una presión absoluta de 50 kPa (Pu = - 500 mbar relativos).

A partir de la fórmula F.1, se determinan las preselecciones de diámetros según la velocidad de flujo máxima admisible:

TABLA B.1 :

|                                    | 10   | 12   | 14   | 16   |
|------------------------------------|------|------|------|------|
| Caudal máximo (NL/min)             | 58   | 84   | 114  | 149  |
| Caudal máximo (Nm <sup>3</sup> /h) | 3,50 | 5,04 | 6,86 | 8,96 |

|                                    | 18    | 20    | 26    | 30    |
|------------------------------------|-------|-------|-------|-------|
| Caudal máximo (NL/min)             | 189   | 233   | 394   | 525   |
| Caudal máximo (Nm <sup>3</sup> /h) | 11,34 | 14,00 | 23,66 | 31,49 |

|                                    | 40    | 50    | 60     | 70     |
|------------------------------------|-------|-------|--------|--------|
| Caudal máximo (NL/min)             | 933   | 1.459 | 2.100  | 2.858  |
| Caudal máximo (Nm <sup>3</sup> /h) | 55,99 | 87,48 | 125,98 | 171,47 |

|                                    | 80     | 90     | 99.4   | 120    |
|------------------------------------|--------|--------|--------|--------|
| Caudal máximo (NL/min)             | 3.733  | 4.724  | 5.762  | 8.398  |
| Caudal máximo (Nm <sup>3</sup> /h) | 223,96 | 283,45 | 344,75 | 503,91 |

|                                    | 134.4  | 153.6  | 180.8   |
|------------------------------------|--------|--------|---------|
| Caudal máximo (NL/min)             | 10.535 | 13.760 | 19.065  |
| Caudal máximo (Nm <sup>3</sup> /h) | 632,10 | 825,60 | 1.43,89 |

**Nota 1** para el vacío, para la alimentación de las tomas, la experiencia indica no debe usar menos tubo de 10 mm de diámetro interno. Tubos de diámetro interior 8 mm puede utilizarse para el terminal en una longitud que no puede ser mayor de 50 cm.

**Nota 2** para vacío, para la parte de la red de corredor de circulación, la experiencia demuestra que no se debe utilizar menos de 12 mm de diámetro interno.

Después de la preselección del diámetro interior de acuerdo con el punto 6.4.2, se verificará que los criterios 6.4.3.2 son respetados.

Para calcular la pérdida de presión de cada una de las secciones, es apropiado usar el Anexo C o la Tabla B.2.

TABLA B.2: Pérdida de carga a 500mbar absorbido en mbar/m según el caudal en presión atmosférica





Perte de charge à 500 mbar abs. en mbar/m

| Débit à la pression atmosphérique |       |       |       | Débit à la pression atmosphérique |       |       |        | Débit à la pression atmosphérique |          |          |          |
|-----------------------------------|-------|-------|-------|-----------------------------------|-------|-------|--------|-----------------------------------|----------|----------|----------|
| Nl/min                            | DN 60 | DN 70 | DN 80 | Nl/min                            | DN 90 | DN 99 | DN 120 | Nl/min                            | DN 134,4 | DN 153,6 | DN 180,8 |
| 48                                | 0,001 | -     | -     | 120                               | 0,001 | -     | -      | 240                               | -        | -        | -        |
| 96                                | 0,003 | 0,002 | 0,001 | 240                               | 0,002 | 0,002 | 0,001  | 480                               | 0,001    | 0,001    | -        |
| 144                               | 0,007 | 0,003 | 0,002 | 360                               | 0,005 | 0,003 | 0,001  | 720                               | 0,002    | 0,001    | 0,001    |
| 192                               | 0,011 | 0,005 | 0,003 | 480                               | 0,008 | 0,005 | 0,002  | 960                               | 0,004    | 0,002    | 0,001    |
| 240                               | 0,016 | 0,008 | 0,004 | 600                               | 0,012 | 0,008 | 0,003  | 1200                              | 0,006    | 0,003    | 0,001    |
| 288                               | 0,023 | 0,011 | 0,006 | 720                               | 0,016 | 0,010 | 0,004  | 1440                              | 0,008    | 0,004    | 0,002    |
| 336                               | 0,030 | 0,014 | 0,008 | 840                               | 0,021 | 0,014 | 0,005  | 1680                              | 0,011    | 0,006    | 0,003    |
| 384                               | 0,037 | 0,018 | 0,010 | 960                               | 0,027 | 0,017 | 0,007  | 1920                              | 0,014    | 0,007    | 0,003    |
| 432                               | 0,046 | 0,022 | 0,012 | 1080                              | 0,033 | 0,021 | 0,008  | 2160                              | 0,017    | 0,009    | 0,004    |
| 480                               | 0,055 | 0,027 | 0,014 | 1200                              | 0,040 | 0,025 | 0,010  | 2400                              | 0,020    | 0,011    | 0,005    |
| 528                               | 0,065 | 0,031 | 0,017 | 1320                              | 0,047 | 0,030 | 0,012  | 2640                              | 0,024    | 0,013    | 0,006    |
| 576                               | 0,076 | 0,037 | 0,019 | 1440                              | 0,055 | 0,035 | 0,014  | 2880                              | 0,028    | 0,015    | 0,007    |
| 624                               | 0,087 | 0,042 | 0,022 | 1560                              | 0,063 | 0,040 | 0,016  | 3120                              | 0,032    | 0,017    | 0,008    |
| 672                               | 0,099 | 0,048 | 0,025 | 1680                              | 0,072 | 0,046 | 0,018  | 3360                              | 0,036    | 0,019    | 0,009    |
| 720                               | 0,112 | 0,054 | 0,029 | 1800                              | 0,081 | 0,052 | 0,021  | 3600                              | 0,041    | 0,022    | 0,010    |
| 768                               | 0,126 | 0,060 | 0,032 | 1920                              | 0,091 | 0,058 | 0,023  | 3840                              | 0,046    | 0,024    | 0,011    |
| 816                               | 0,140 | 0,067 | 0,036 | 2040                              | 0,101 | 0,064 | 0,026  | 4080                              | 0,051    | 0,027    | 0,012    |
| 864                               | 0,154 | 0,074 | 0,039 | 2160                              | 0,112 | 0,071 | 0,029  | 4320                              | 0,056    | 0,030    | 0,014    |
| 912                               | 0,170 | 0,082 | 0,043 | 2280                              | 0,123 | 0,078 | 0,031  | 4560                              | 0,062    | 0,033    | 0,015    |
| 960                               | 0,186 | 0,089 | 0,047 | 2400                              | 0,134 | 0,085 | 0,034  | 4800                              | 0,067    | 0,036    | 0,016    |
| 1008                              | 0,202 | 0,097 | 0,052 | 2520                              | 0,146 | 0,093 | 0,037  | 5040                              | 0,073    | 0,039    | 0,018    |
| 1056                              | 0,219 | 0,105 | 0,056 | 2640                              | 0,159 | 0,101 | 0,041  | 5280                              | 0,080    | 0,042    | 0,019    |
| 1104                              | 0,237 | 0,114 | 0,060 | 2760                              | 0,172 | 0,109 | 0,044  | 5520                              | 0,086    | 0,046    | 0,021    |
| 1152                              | 0,255 | 0,123 | 0,065 | 2880                              | 0,185 | 0,118 | 0,047  | 5760                              | 0,093    | 0,049    | 0,023    |
| 1200                              | 0,274 | 0,132 | 0,070 | 3000                              | 0,199 | 0,126 | 0,051  | 6000                              | 0,099    | 0,053    | 0,024    |
| 1248                              | 0,294 | 0,141 | 0,075 | 3120                              | 0,213 | 0,135 | 0,054  | 6240                              | 0,107    | 0,057    | 0,026    |
| 1296                              | 0,314 | 0,151 | 0,080 | 3240                              | 0,227 | 0,145 | 0,058  | 6480                              | 0,114    | 0,060    | 0,028    |
| 1344                              | 0,334 | 0,161 | 0,085 | 3360                              | 0,242 | 0,154 | 0,062  | 6720                              | 0,121    | 0,064    | 0,030    |
| 1392                              | 0,356 | 0,171 | 0,091 | 3480                              | 0,258 | 0,164 | 0,066  | 6960                              | 0,129    | 0,068    | 0,032    |
| 1440                              | 0,377 | 0,181 | 0,096 | 3600                              | 0,273 | 0,174 | 0,070  | 7200                              | 0,137    | 0,073    | 0,033    |
| 1488                              | 0,400 | 0,192 | 0,102 | 3720                              | 0,289 | 0,184 | 0,074  | 7440                              | 0,145    | 0,077    | 0,035    |
| 1536                              | 0,422 | 0,203 | 0,108 | 3840                              | 0,306 | 0,195 | 0,078  | 7680                              | 0,153    | 0,081    | 0,037    |
| 1584                              | 0,446 | 0,214 | 0,114 | 3960                              | 0,323 | 0,205 | 0,082  | 7920                              | 0,162    | 0,086    | 0,040    |
| 1632                              | 0,470 | 0,226 | 0,120 | 4080                              | 0,340 | 0,216 | 0,087  | 8160                              | 0,170    | 0,090    | 0,042    |
| 1680                              | 0,494 | 0,238 | 0,126 | 4200                              | 0,358 | 0,228 | 0,091  | 8400                              | 0,179    | 0,095    | 0,044    |
| 1728                              | 0,519 | 0,250 | 0,132 | 4320                              | 0,376 | 0,239 | 0,096  | 8640                              | 0,188    | 0,100    | 0,046    |
| 1776                              | 0,545 | 0,262 | 0,139 | 4440                              | 0,395 | 0,251 | 0,101  | 8880                              | 0,198    | 0,105    | 0,048    |
| 1824                              | 0,571 | 0,274 | 0,146 | 4560                              | 0,413 | 0,263 | 0,105  | 9120                              | 0,207    | 0,110    | 0,051    |
| 1872                              | 0,597 | 0,287 | 0,152 | 4680                              | 0,433 | 0,275 | 0,110  | 9360                              | 0,218    | 0,115    | 0,053    |
| 1920                              | 0,624 | 0,300 | 0,159 | 4724                              | 0,440 | 0,280 | 0,112  | 9600                              | 0,228    | 0,120    | 0,055    |
| 1968                              | 0,652 | 0,313 | 0,166 | 4800                              |       | 0,288 | 0,115  | 9840                              | 0,239    | 0,125    | 0,058    |
| 2016                              | 0,680 | 0,327 | 0,173 | 4920                              |       | 0,300 | 0,120  | 10080                             | 0,249    | 0,131    | 0,060    |
| 2064                              | 0,709 | 0,341 | 0,181 | 5040                              |       | 0,313 | 0,126  | 10320                             | 0,260    | 0,136    | 0,063    |
| 2100                              | 0,730 | 0,351 | 0,186 | 5160                              |       | 0,326 | 0,131  | 10536                             | 0,270    | 0,141    | 0,065    |
| 2112                              |       | 0,355 | 0,188 | 5280                              |       | 0,340 | 0,136  | 10560                             |          | 0,142    | 0,065    |
| 2160                              |       | 0,369 | 0,196 | 5400                              |       | 0,353 | 0,142  | 10800                             |          | 0,149    | 0,068    |
| 2208                              |       | 0,383 | 0,203 | 5520                              |       | 0,367 | 0,147  | 11040                             |          | 0,155    | 0,071    |
| 2256                              |       | 0,398 | 0,211 | 5640                              |       | 0,381 | 0,153  | 11280                             |          | 0,161    | 0,073    |
| 2304                              |       | 0,413 | 0,219 | 5716                              |       | 0,390 | 0,157  | 11520                             |          | 0,167    | 0,076    |
| 2352                              |       | 0,428 | 0,227 | 5760                              |       |       | 0,159  | 11760                             |          | 0,173    | 0,079    |
| 2400                              |       | 0,444 | 0,235 | 5880                              |       |       | 0,164  | 12000                             |          | 0,180    | 0,082    |
| 2448                              |       | 0,459 | 0,244 | 6000                              |       |       | 0,170  | 12240                             |          | 0,186    | 0,085    |
| 2496                              |       | 0,475 | 0,252 | 6120                              |       |       | 0,176  | 12480                             |          | 0,193    | 0,088    |
| 2544                              |       | 0,491 | 0,261 | 6240                              |       |       | 0,183  | 12720                             |          | 0,199    | 0,091    |
| 2592                              |       | 0,508 | 0,269 | 6360                              |       |       | 0,189  | 12960                             |          | 0,206    | 0,094    |
| 2640                              |       | 0,524 | 0,278 | 6480                              |       |       | 0,195  | 13200                             |          | 0,213    | 0,098    |
| 2688                              |       | 0,541 | 0,287 | 6600                              |       |       | 0,201  | 13440                             |          | 0,220    | 0,101    |
| 2736                              |       | 0,558 | 0,296 | 6720                              |       |       | 0,208  | 13680                             |          | 0,227    | 0,104    |
| 2784                              |       | 0,575 | 0,305 | 6840                              |       |       | 0,214  | 13760                             |          | 0,230    | 0,105    |
| 2832                              |       | 0,593 | 0,314 | 6960                              |       |       | 0,221  | 13920                             |          |          | 0,107    |
| 2880                              |       | 0,602 | 0,319 | 7080                              |       |       | 0,228  | 14160                             |          |          | 0,111    |
| 2880                              |       |       | 0,324 | 7200                              |       |       | 0,234  | 14400                             |          |          | 0,114    |
| 2928                              |       |       | 0,333 | 7320                              |       |       | 0,241  | 14640                             |          |          | 0,117    |
| 2976                              |       |       | 0,343 | 7440                              |       |       | 0,248  | 14880                             |          |          | 0,121    |
| 3024                              |       |       | 0,353 | 7560                              |       |       | 0,255  | 15120                             |          |          | 0,124    |
| 3072                              |       |       | 0,362 | 7680                              |       |       | 0,262  | 15360                             |          |          | 0,128    |
| 3120                              |       |       | 0,372 | 7800                              |       |       | 0,270  | 15600                             |          |          | 0,132    |
| 3168                              |       |       | 0,382 | 7920                              |       |       | 0,277  | 15840                             |          |          | 0,135    |
| 3216                              |       |       | 0,393 | 8040                              |       |       | 0,284  | 16080                             |          |          | 0,139    |
| 3264                              |       |       | 0,403 | 8160                              |       |       | 0,292  | 16320                             |          |          | 0,143    |
| 3312                              |       |       | 0,413 | 8280                              |       |       | 0,299  | 16560                             |          |          | 0,146    |
| 3360                              |       |       | 0,424 | 8398                              |       |       | 0,309  | 16800                             |          |          | 0,150    |
| 3408                              |       |       | 0,435 |                                   |       |       |        | 17040                             |          |          | 0,154    |
| 3456                              |       |       | 0,445 |                                   |       |       |        | 17280                             |          |          | 0,158    |
| 3504                              |       |       | 0,456 |                                   |       |       |        | 17520                             |          |          | 0,162    |
| 3552                              |       |       | 0,467 |                                   |       |       |        | 17760                             |          |          | 0,166    |
| 3600                              |       |       | 0,478 |                                   |       |       |        | 18000                             |          |          | 0,170    |
| 3648                              |       |       | 0,490 |                                   |       |       |        | 18240                             |          |          | 0,174    |
| 3696                              |       |       | 0,501 |                                   |       |       |        | 18480                             |          |          | 0,178    |
| 3733                              |       |       | 0,510 |                                   |       |       |        | 18720                             |          |          | 0,183    |
|                                   |       |       |       |                                   |       |       |        | 18960                             |          |          | 0,187    |
|                                   |       |       |       |                                   |       |       |        | 19064                             |          |          | 0,189    |



## B.2 EJEMPLOS DE APLICACIONES

Ejemplo del dimensionamiento de una red de vacío médico.

El objetivo es determinar los diámetros suficientes para cumplir con un máximo de 100 mbar de pérdidas entre los puntos A y C y un máximo de 250 mbar entre puntos A y I y entre los puntos F y I (según los requisitos señalados en el punto 6.4.3.2).

### B.2.1 Cálculo de diámetros de tubería de la red secundaria de un servicio de cirugía de tipo C (20 camas) sección AC y un servicio de medicina de tipo B (22 camas) sección FH

#### - Servicio de cirugía

##### - Diámetro del segmento AB (ramal de habitaciones)

A partir de la habitación más alejada (punto A), el caudal de la habitación es:

$2 \times 24 \text{ NL/min} = 48 \text{ NL/min}$  - La tabla 1 da un diámetro DN 10.

Determinar la pérdida de carga del ramal (entre el punto A y B) con una longitud de 8 metros.

Segun la tabla B.2 la perdida de carga por un DN 10 y con este caudal es de de 4,654 mbar por metro por la seccion AB:  $4,654 \text{ mbar} \times 8 \text{ m} = \mathbf{37,23 \text{ mbar}}$  de carga pérdida.

##### -Diámetro del segmento AC

Pérdida de carga entre A y C  $37,23 + 58,71 = \mathbf{95,94 \text{ mbar}} < 100 \text{ mbar}$ . El DN 20 cumple con los requisitos solicitados en la sección 6.4.3.2

Los diámetros especificados son por lo tanto DN10 para antenas (AB) y DN20 para circulación (BC).

#### - Servicio de medicina

##### -Diámetro del segmento FG (ramal de habitaciones)

A partir de la habitación más alejada (punto F), es caudal de la habitación:

$1 \times 24 \text{ NL/min} = 24 \text{ NL/min}$  La tabla B.1 da un diametro DN10.

Determinar la pérdida del ramal (entre el punto E y F) con una longitud de 7 metros.

Segun la tabla B.2 la perdida de carga por un DN 10 y con este caudal es de de 1,384 mbar por metro por la seccion FG:  $1,384 \text{ mbar} \times 7 \text{ m} = \mathbf{9,69 \text{ mbar}}$  de carga pérdida.

##### -Diámetro de la sección de GH (circulación secundaria)

El caudal del servicio es de 22 camas  $\times 1 \times 24 \text{ NL/min} \times 15\% = 79,20 \text{ NL/min}$  total de 4,752 Nm<sup>3</sup>/h. La tabla 3 da un tamaño diámetro DN12.

Determinar la pérdida de carga (entre el punto G y H) con una longitud de 35 metros.

Segun la tabla B.2 la perdida de carga por un DN 12 y con este caudal es de de 5,212 mbar por metro por la seccion GH:  $5,212 \text{ mbar} \times 35 \text{ m} = \mathbf{182,42 \text{ mbar}}$  de carga pérdida.

Por lo que el total del segmento FH es de  $0,7 + 161 = \mathbf{161,7} > 100 \text{ mbar}$

El DN12 no cumple con la sección 6.4.3.2, por lo que es necesario aumentar de diámetro, será DN16.

Segun la tabla B.2 la perdida de carga por un DN 16 y con este caudal es de de 1,329 mbar por metro por la seccion GH:  $1,329 \text{ mbar} \times 35 \text{ m} = \mathbf{46,52 \text{ mbar}}$  de carga pérdida.

Por lo que la pérdida del segmento FH total es  $9,69 + 46,52 = \mathbf{55,21 \text{ mbar}} \leq 100\text{mbar}$ .

El DN 16 cumple con los requisitos solicitados en la sección 6.4.3.2

##### -Diámetro del segmento FH

Los diámetros especificados son por lo tanto DN10 para ramales (FG) y DN14 para circulación (GH).

## B.2.2 Cálculo de diámetros de tubería de la red primaria

### - Determinación del diámetro inicial de la sección del tubo ascendente DI

El tubo ascendente tendrá un diámetro constante en toda su longitud de acuerdo con el párrafo 6.4.2. Para esto tenemos en cuenta que la acumulación de los débitos de los servicios de cirugía y medicina es  $192 \text{ NL / min} + 79,20 \text{ NL / min} = 271,20 \text{ NL / min}$ . La Tabla B.1 muestra un diámetro DN 26.

Ahora calcularemos las pérdidas de carga de la red primaria.

### - Segmento CD

En el punto D, la velocidad de flujo es la del servicio quirúrgico calculado anteriormente, es decir,  $192 \text{ NL / min}$ . En la continuidad de diámetro de la circulación secundaria, debemos tomar el DN 20.

De acuerdo con la Tabla B.2, la pérdida de carga para un DN 20 y a esta velocidad es de  $1.957 \text{ mbar por metro}$ , es decir, Sección de CD:  $1,957 \text{ mbar} \times 20 \text{ m} = \mathbf{39,14 \text{ mbar}}$  de pérdida de carga.

### - Segmento DE

En el punto E, la velocidad de flujo es la del servicio de cirugía calculado anteriormente, es decir,  $192 \text{ NL / min}$ . En la continuidad de diámetro del tubo ascendente, debemos tomar el DN 26.

Según la Tabla B.2, la pérdida de carga para un DN 26 y a esta velocidad es de  $0,5637 \text{ mbar por metro}$ , es decir, la sección DE:  $0,563 \text{ mbar} \times 4 \text{ m} = \mathbf{2,25 \text{ mbar}}$  de pérdida de presión.

La caída de presión de la sección AE es por lo tanto de  $37,23 + 58,71 + 39,14 + 2,25 = \mathbf{137,33 \text{ mbar}}$ .

### - Segmento HE

En el punto H, el flujo del servicio de medicina calculado anteriormente es  $79,20 \text{ NL / min}$ . En la continuidad de diámetro de la circulación secundaria, debemos tomar el DN 16.

De acuerdo con la Tabla B.2, la pérdida de carga para un DN 16 y a esta velocidad es de  $1.329 \text{ mbar por metro}$ , es decir, Sección HE:  $1,329 \text{ mbar} \times 30 \text{ m} = \mathbf{39,87 \text{ mbar}}$  de caída de presión.

La caída de presión del punto F a E es por lo tanto  $9,69 + 46,52 + 39,87 = \mathbf{96,08 \text{ mbar}}$ .

### - Segmento EI

El flujo en el punto E es la suma de los flujos de los dos servicios conectados en este punto:

$192 \text{ NL / min} + 79,20 \text{ NL / min} = 271,20 \text{ NL / min}$ . La Tabla B.1 muestra un diámetro DN 26.

Determine la pérdida de carga de la sección (entre el punto E y I) con una longitud de  $40 \text{ m}$ .

De acuerdo con la Tabla B.2, la pérdida de carga para un DN 26 y a este caudal es de  $1,144 \text{ mbar por metro}$ , es decir, la Sección HI:  $1,144 \text{ mbar} \times 40 \text{ m} = \mathbf{45,76 \text{ mbar}}$ .

La pérdida de carga de la sección AI es la suma de las pérdidas de presión de AE y EI:

$$- 137,33 \text{ mbar} + 45,76 \text{ mbar} = \mathbf{183,09 \text{ mbar}} \leq 250 \text{ mbar}.$$

La pérdida de carga de la sección FI es la suma de las pérdidas de presión de FE y EI:

$$- 96,08 \text{ mbar} + 45,76 \text{ mbar} = \mathbf{141,84 \text{ mbar}} \leq 250 \text{ mbar}.$$

### - Conclusión

El diámetro determinado es DN 26 para la sección EI.

## Apéndice C

### Las fórmulas de cálculo

#### C.1 origen de la fórmula para el cálculo del diámetro.

La fórmula que se indica en la especificación para el cálculo del diámetro es:

$$D = 18,9 \sqrt{\frac{Q_r}{V_u \cdot P_u}} \quad \text{Fórmula F1}$$

$Q_r$  Caudal medido a la temperatura y la presión de referencia (P.atm y 15°C) → Nm<sup>3</sup>/h

$v_u$  Velocidad del gas → m/s

$D$  Diámetro interno → mm

$P_u$  Presión absoluta de utilización → bar abs

Segun la ley de los gases perfectos:

En las condiciones de referencia:  $P_r Q_r = n R T_r$

En las condiciones de uso:  $P_u Q_u = n R T_u$

$n$  y  $R$  son constantes en ambas condiciones, la fórmula que relaciona 'el diámetro-velocidad-flujo' es la siguiente:

$$\frac{P_r Q_r}{P_u Q_u} = \frac{T_r}{T_u}$$

$T_r$  Temperatura absoluta de referencia = 288K (15°C) → °C

$P_r$  Presión absoluta de referencia = 1.013 bar → bar abs

$Q_r$  Flujo medido a la temperatura de referencia  $T_r$  y a la presión de referencia  $P_r$  → Nm<sup>3</sup>/h

$T_u$  Temperatura absoluta de utilización = 288K (15°C) → °C

$P_u$  Presión absoluta de utilización → bar abs

$Q_u$   $Q_u = \frac{\pi D^2}{4} \cdot V_u \cdot 3.600 =$  flujo en condiciones de utilización → m<sup>3</sup>/h

$D$  Diámetro interno del tubo → mm

$v_u$  Velocidad del gas en condiciones de utilización m/s

$$\begin{aligned} Q_u &= Q_r \cdot \frac{T_u}{T_r} \cdot \frac{P_r}{P_u} = Q_r \cdot \frac{1,013}{P_u} \\ \frac{\pi D^2}{4} \cdot 10^{-6} \cdot V_u \cdot 3.600 &= Q_r \cdot \frac{1,013}{P_u} \\ D^2 &= \frac{4 \cdot 1,013}{\pi \cdot 10^{-6} \cdot 3.600} \cdot \frac{Q_r}{V_u \cdot P_u} = 358,27 \cdot \frac{Q_r}{V_u \cdot P_u} \end{aligned}$$

Dónde la fórmula utilizada es:

$$D = 18,9 \sqrt{\frac{Q_r}{V_u \cdot P_u}} \quad \text{Fórmula F2}$$

## C.2 Supuestos usados

Los gases medicinales se asimilan a **gas compresible**. El flujo es turbulento. Un fluido compresible se caracteriza por su volumen, su densidad y su viscosidad. Todos estos parámetros varían mucho dependiendo de la presión.

Temperatura de referencia: 15 ° C

| Presión Relativa (bar) | Presión Absoluta (bar) | Densidad (kg/m <sup>3</sup> ) | Viscosidad Dinámica (kg/ms * 10 <sup>6</sup> ) | Viscosidad Cinética (m <sup>2</sup> /s * 10 <sup>6</sup> ) |
|------------------------|------------------------|-------------------------------|------------------------------------------------|------------------------------------------------------------|
| -0,500                 | 0,500                  | 0,604                         | 17,95                                          | 29,68                                                      |
| 0                      | 1,013                  | 1,225                         | 17,95                                          | 14,65                                                      |

## C.3 Fórmulas para cálculos de pérdidas de carga

Fórmula general de Darcy-Weisbach (gas perfecto compresible):

$$\Delta P = \lambda \frac{\rho \cdot V^2 \cdot L}{2 \cdot D} \quad (\text{Fórmula 3})$$

$\Delta P$  Pérdida de carga → Pa

$\lambda$  Coeficiente de pérdida de carga

$\rho$  Densidad del gas a la presión de utilización → kg/m<sup>3</sup>

V Velocidad del gas → m/s

D Diámetro interior → m

L Longitud total de la red calculada (longitud lineal y equivalentes) → m

Para el aire seco a 15 °C:  $\rho = 1,225 \cdot \frac{P_{calc}}{1,013}$

$P_{calc}$  Presión de utilización calculada (absoluta) → mbar abs

Número de Reynolds:

$$Re = \frac{V \cdot D}{\nu}$$

Re → -

V Velocidad de la luz → m/s

$\nu$  Viscosidad cinemática → m<sup>2</sup>s<sup>-1</sup>

Para el aire:  $\nu = 14,65 \cdot 10^{-6} \text{ m}^2\text{s}^{-1}$  a 15°C a la presión atmosférica.

Es inversamente proporcional a la presión.

$$\nu = 14,65 \cdot 10^{-6} \cdot \frac{1,031}{P_{calc}}$$

$P_{calc}$  Presión de utilización calculada (absoluta) → mbar abs

Cálculo del coeficiente de pérdida de carga  $\lambda$ :

Para un gas perfecto compresible

- Fórmula de Blasius:  $3.000 < Re < 100.000$

$$\lambda = 0,316 \cdot Re^{-0,25}$$

- Fórmula de Hermann:  $10^5 < Re < 2 \cdot 10^6$

$$\lambda = 0,0054 + 0,395 \cdot Re^{-0,3}$$

## Bibliografía

[1] NF EN ISO 7396-2: 2009, Sistemas médicos de distribución de gas - Parte 2: Sistemas de escape de gas de anestesia no reutilizable (índice de clasificación: S 95-155-2) (Reemplaza NF EN 737-2: 1998)

[2] NF EN ISO 9170-2: 2008, Tomas de pared para sistemas de distribución de gases médicos. Parte 2: Tomas murales para sistemas de evacuación de gases anestésicos (índice de clasificación: S 95-162-2). (Sustituye a NF EN 737-4: 1998)

[3] NF EN ISO 17672, Soldadura fuerte - Metales de relleno (índice de clasificación: A 81-361)

[4] Orden de 25 de abril de 2000 (DO de 16 de junio de 2000) sobre locales de pretrabajo y trabajo, exámenes médicos y exámenes en neonatología y reanimación neonatal

[5] Orden de 25 de abril de 2005 relativa a locales, equipos técnicos y dispositivos médicos en establecimientos de salud que llevan a cabo la actividad "tratamiento de la insuficiencia renal crónica por el práctica de tratamiento extrarrenal »

[6] Orden de 10 de marzo de 1997 sobre los requisitos generales aplicables a las instalaciones clasificadas para protección del medio ambiente sujeta a declaración en la partida 1220 (Uso y almacenamiento del oxígeno)

[7] Carta circular DH / 5D / n ° 335 del 3 de mayo de 1990 relativa a la accesibilidad de las válvulas de cierre redes de distribución de gases médicos no inflamables

[8] Directiva 93/42 / CEE del Consejo, de 14 de junio de 1993, sobre dispositivos médicos (transcrita en Libro V bis del Código de Salud Pública), en su versión modificada por la Directiva 2007/47 / CE del Parlamento Europeo y del Consejo de 5 de septiembre de 2007



# Medical gas pipeline systems

Design, installation,  
validation and verification

Health Technical Memorandum 2022

London: The Stationery Office

© Crown copyright 1997. Published with permission of NHS Estates, an Executive Agency of the Department of Health, on behalf of the Controller of Her Majesty's Stationery Office.

Applications for reproduction should be made in writing to The Copyright Unit, Her Majesty's Stationery Office, St Clements House, 2-16 Colegate, Norwich NR3 1BQ.

First published 1997

ISBN 0-11-322067-7

### **Standing order service**

Are you making full use of The Stationery Office's Standing Order Service?

The Standing Order Service is a free monitoring of the publications of your choice from over 4000 classifications in 30 major subject areas. We send you your books as they are published, along with an invoice.

With a standing order for class 14.02.017 you can be supplied automatically with further titles in this series as they are published.

The benefits to you are:

- automatic supply of your choice of classification on publication;
- no need for time-consuming and costly research, telephone calls and scanning of daily publication lists;

- saving on the need and the costs of placing individual orders.

We can supply a wide range of publications on standing order, from individual annual publications to all publications on a selected subject. If you do not already use this free service, or think you are not using it to its full capacity, why not contact us and discuss your requirements?

You can contact us at:

**The Stationery Office  
Standing Order Department  
PO Box 276  
London SW8 5DT**

**Tel: 0171-873 8466; fax 0171-873 8222**

We look forward to hearing from you.

## About this series

Health Technical Memoranda (HTMs) give comprehensive advice and guidance on the design, installation and operation of specialised building and engineering technology used in the delivery of healthcare.

They are applicable to new and existing sites, and are for use at various stages during the inception, design, construction, refurbishment and maintenance of a building.

# Executive summary

An MGPS is installed to provide a safe, convenient and cost-effective system for the provision of medical gases to the clinical and nursing staff at the point of use. It reduces the problems associated with the use of gas cylinders such as safety, portage, storage and noise.

The guidance given in this HTM should be followed for all new installations, and for refurbishment or upgrading of existing installations.

It is not necessary to apply the guidance retrospectively unless patient or staff safety would be compromised. In this case, the guidance given in this HTM should be followed.

Existing installations should be assessed for compliance with this HTM. A plan for upgrading the existing system should be prepared, taking account of the priority for patient safety. Managers will need to liaise with medical colleagues and take account of other guidance published by the Department of Health in order to assess the system for technical shortcomings.

This volume of Health Technical Memorandum (HTM) 2022 looks at issues of design, installation, verification and validation. It covers the user requirements for flow, pressure and diversity and gives technical guidance on the design, installation and accommodation of plant and medical pipeline distribution systems. In addition, this volume describes the procedures to be carried out before a medical gas pipeline system (MGPS) can be taken into use. The tests to be carried out at each stage of the installation programme are set out, together with requirements for personnel, instrumentation and documentation required.

This volume is intended for use by designers, installers, manufacturers, operational managers, engineers, quality controllers, technicians, finance officers and other professionals involved in the day-to-day running of an MGPS.

The primary objective of this volume is to ensure the provision of safe and reliable MGPS and their efficient operation and use. This objective will only be achieved if the medical and nursing users and estates staff participate in the introduction of an operational policy designed to minimise the hazards likely to arise from misuse of the system.

# Contents

- 1.0 Scope** *page 7*
  - 1.1 Guidance in this document
  - 1.6 Other guidance
  - 1.7 Design installation and testing
- 2.0 General principles** *page 8*
  - 2.1 General statement
  - 2.8 Quality requirements for medical gases and air
  - 2.11 Odour and moisture
    - 2.11 Odour
    - 2.13 Moisture
  - 2.16 Pipeline distribution system design
  - 2.19 Safety
  - 2.24 Installation/supply of equipment/maintenance
  - 2.25 Modifications
  - 2.28 Removal of pipework
  - 2.29 Validation and verification
  - 2.30 General fire precautions
    - 2.30 General
    - 2.32 Fire detection system
  - 2.33 Electricity supply to medical gas installations
    - 2.33 General
    - 2.40 Earthing
    - 2.42 Installation of electrical cables
    - 2.45 Electrical wiring in plantrooms
  - 2.49 Electrical supply pendants
    - 2.49 Ceiling pendant fittings – rigid, multi-purpose type
    - 2.50 Bed head trunking/walling system
- 3.0 Provision of terminal units** *page 15*
  - 3.1 General
  - 3.18 Terminal units for nitric oxide, oxygen/carbon dioxide mixture
  - 3.19 Nitrogen for surgical tools
- 4.0 Gas flow** *page 21*
  - 4.1 General
  - 4.10 Gas flow
    - 4.10 Terminal unit flows
    - 4.13 Pipeline flows
  - 4.21 Oxygen
    - 4.21 In-patient accommodation
    - 4.27 Hyperbaric oxygen chambers
    - 4.28 Operating departments
    - 4.32 Intensive therapy and coronary care units
    - 4.36 Maternity
  - 4.40 Nitrous oxide
  - 4.43 Nitrous oxide/oxygen mixtures
  - 4.47 Medical air
    - 4.47 General
    - 4.49 Medical air 400 kPa
      - 4.49 General
      - 4.55 Pressure requirements
      - 4.59 In-patient accommodation
    - 4.63 Surgical air 700 kPa
      - 4.63 Flow and pressure requirements for 700 kPa surgical air system
      - 4.66 Diversity
      - 4.68 System capacity
      - 4.69 Terminal units intended for equipment testing
    - 4.71 Vacuum
      - 4.71 In-patient accommodation
      - 4.75 Operating departments
      - 4.82 Intensive therapy unit, coronary care unit and neonatal unit
- 5.0 System design – General** *page 35*
  - 5.1 Cylinder manifold installation
    - 5.1 General
    - 5.9 Pressure control
    - 5.14 Manifold monitoring and indicating system
    - 5.16 Manifold control unit
    - 5.17 Manifold monitoring
    - 5.18 Manifold indication unit
    - 5.19 Alarm signal status unit
  - 5.23 Emergency reserve supply
    - 5.23 General
    - 5.31 Emergency reserve supplies for manifold installations
  - 5.33 Emergency reserve supply for air compressors/liquid oxygen/oxygen concentrators (PSA)
    - 5.34 Location
    - 5.35 Design
- 6.0 System design – Oxygen supplies** *page 42*
  - 6.1 Bulk liquid oxygen systems and vacuum insulated evaporator (VIE)
    - 6.1 General
    - 6.5 System sizing
    - 6.9 Equipment description
    - 6.10 Standby oxygen facility
    - 6.11 System layout
    - 6.12 VIE
    - 6.15 Control piping and instrumentation
    - 6.17 Pressure raising system
    - 6.19 Direct reading contents gauge and telemetry systems
    - 6.26 Control panel
    - 6.27 Sites for liquid oxygen storage
    - 6.30 Operation
    - 6.32 Standby system in use

|            |                                                   |            |                                                                         |
|------------|---------------------------------------------------|------------|-------------------------------------------------------------------------|
| 6.35       | Standby low                                       | 7.42       | Activated carbon filter                                                 |
| 6.36       | Low line pressure                                 | 7.43       | Bacteria filters                                                        |
| 6.37       | High line pressure                                | 7.44       | Pressure control                                                        |
| 6.39       | VIE filling                                       | 7.45       | Test point                                                              |
| 6.40       | Maintenance                                       | 7.46       | Safety valves                                                           |
| 6.42       | Standby oxygen facility                           | 7.48       | Traps and valves                                                        |
| 6.45       | Backup bulk liquid storage vessel                 | 7.48       | Automatic drainage traps                                                |
| 6.48       | Liquid cylinder backup                            | 7.50       | Non-return valves                                                       |
| 6.50       | Compressed gas cylinder backup                    | 7.51       | Isolating valves                                                        |
| 6.52       | Emergency supply facility                         | 7.52       | Pressure indicators                                                     |
| 6.58       | Alarm signal status unit                          | 7.53       | Operating and indicating system                                         |
| 6.62       | Liquid oxygen supplies                            | 7.61       | Plant control unit                                                      |
| 6.62       | General                                           | 7.64       | Plant control indication                                                |
| 6.65       | Liquid cylinder design                            | 7.65       | Compressor starter units                                                |
| 6.67       | Liquid cylinder manifolds                         | 7.66       | Dryer control unit                                                      |
| 6.69       | Control panel                                     | 7.68       | Plant status monitoring                                                 |
| 6.71       | Emergency compressed oxygen manifold              | 7.69       | Plant indicator unit                                                    |
| 6.72       | Siting requirements                               | 7.72       | Alarm signal status unit                                                |
| 6.82       | Liquid cylinder manifold sizing                   | 7.77       | Plant management                                                        |
| 6.84       | Refilling                                         | 7.78       | Operating considerations                                                |
| 6.85       | Alarm signal status unit                          | 7.79       | Synthetic air                                                           |
| 6.89       | Oxygen concentrator installations (PSA plant)     | 7.79       | General                                                                 |
| 6.89       | General                                           | 7.88       | System description                                                      |
| 6.94       | Siting                                            | 7.95       | Storage vessels                                                         |
| 6.98       | Plant configuration                               | 7.95       | Vessel summary                                                          |
| 6.100      | Compressors and vacuum pumps                      | 7.96       | Vessel operating pressure                                               |
| 6.102      | Compressor noise                                  | 7.97       | Main vessel capacity                                                    |
| 6.104      | Molecular sieves                                  | 7.98       | Backup vessel capacity                                                  |
| 6.105      | Dryers                                            | 7.104      | Vaporisation                                                            |
| 6.106      | Oxygen monitoring system                          | 7.109      | Medical oxygen flow control                                             |
| 6.107      | Operating and indicating system                   | 7.110      | Surgical nitrogen flow control                                          |
| 6.111      | Plant control unit                                | 7.112      | Control panel for the nitrogen and oxygen supplies to the mixing panels |
| 6.115      | Plant control indication                          | 7.116      | Air mixing panels                                                       |
| 6.116      | Compressor and vacuum starter units               | 7.121      | Buffer vessels                                                          |
| 6.117      | Molecular sieve control unit                      | 7.124      | Alarm signal status unit                                                |
| 6.119      | Plant status monitoring                           | 7.128      | Emergency supply facility                                               |
| 6.120      | Plant indicator unit                              |            |                                                                         |
| 6.124      | Alarm signal status unit                          |            |                                                                         |
| 6.129      | Plant management                                  |            |                                                                         |
| <b>7.0</b> | <b>System design – Medical air</b> <i>page 67</i> | <b>8.0</b> | <b>System design – surgical air 700 kPa</b> <i>page 86</i>              |
| 7.1        | Compressor systems for 400 kPa medical air        | 8.1        | General                                                                 |
| 7.1        | General                                           | 8.9        | Cylinder manifold supply systems                                        |
| 7.2        | Quality                                           | 8.11       | Compressor supply systems                                               |
| 7.3        | Siting                                            | 8.13       | Operating and alarm system                                              |
| 7.7        | Compressor noise                                  | 8.13       | Cylinder manifold supply system                                         |
| 7.9        | Air intake                                        | 8.13       | Manifold monitoring and indicator system                                |
| 7.10       | Compressor types                                  | 8.14       | Manifold monitoring                                                     |
| 7.13       | Compressor lubrication                            | 8.15       | Manifold indicator unit                                                 |
| 7.21       | After-coolers                                     | 8.16       | Alarm signal status unit                                                |
| 7.22       | Receivers                                         | 8.20       | Compressor supply system                                                |
| 7.24       | Air treatment and filtration                      | 8.21       | Plant status monitoring                                                 |
| 7.24       | General                                           | 8.22       | Plant indicator unit                                                    |
| 7.25       | Solid contaminants                                | 8.25       | Alarm signal status unit                                                |
| 7.29       | Water                                             | 8.30       | Plant management                                                        |
| 7.31       | Oil                                               | 8.31       | Operating considerations                                                |
| 7.39       | Dryer controls                                    | 8.32       | Simplex plant                                                           |
| 7.40       | Dust filters                                      |            |                                                                         |

**9.0 System design – medical vacuum supplies***page 90*

- 9.1 Medical vacuum supplies
  - 9.1 General
  - 9.9 Siting
  - 9.11 Pump noise
  - 9.13 Vacuum plant exhaust
  - 9.16 Efficiency
  - 9.18 Vacuum pumps
  - 9.35 Pressure control
  - 9.37 Valves
  - 9.39 Pressure regulation of vacuum system
  - 9.42 Vacuum indicators
  - 9.44 Electrical supply
  - 9.45 Pump operating and indicating system
    - 9.45 General description
    - 9.49 Plant control unit
    - 9.53 Plant control indication
    - 9.54 Pump starter units
    - 9.55 Plant status monitoring
    - 9.56 Plant status indicator unit
    - 9.58 Alarm signal status unit
- 9.62 Plant management

**10.0 System design – anaesthetic gas scavenging systems** *page 100*

- 10.1 Anaesthetic gas scavenging systems
  - 10.1 General
  - 10.10 Background
  - 10.18 Sources of pollution and provision of AGS systems
  - 10.32 AGS system design
    - 10.32 General
    - 10.35 Active and passive systems
  - 10.40 General design requirements
  - 10.46 Safety criteria
  - 10.48 Performance criteria
  - 10.51 Flow diversity
  - 10.52 Discharge outlet
  - 10.53 Duplex system
  - 10.54 Plant control indication

**11.0 System design – Nitric oxide** *page 109*

- 11.1 Nitric oxide pipeline installations
  - 11.1 Introduction
  - 11.5 Design considerations
  - 11.10 Provision of terminal units, valves and area valve service units (AVSUs)
    - 11.14 Manifold
    - 11.22 Provision of valves
    - 11.24 Provision of AVSUs
  - 11.28 Pipeline distribution
  - 11.29 Identification
  - 11.30 Alarm systems
  - 11.32 Nitric oxide – risk assessment for COSHH compliance
  - 11.38 Validation and verification

**12.0 Warning and alarm systems** *page 114*

- 12.1 General
- 12.7 Panel location
  - 12.7 Central indicator panel
  - 12.8 Repeater indicator panel location
  - 12.9 Area warning and alarm panel location
- 12.10 System description
  - 12.10 System components
- 12.11 System layout
  - 12.11 Central system
  - 12.12 Area warning and alarm systems
- 12.13 General requirements
  - 12.13 Labelling
  - 12.14 Visual signals
  - 12.17 Audible signals
  - 12.18 Automatic re setting
  - 12.19 Temporary muting
  - 12.20 Continuous muting
  - 12.21 Electrical wiring
  - 12.22 System integrity
  - 12.25 Relay condition
  - 12.26 Mains power supply
  - 12.27 SELV/FELV power supply
  - 12.30 Test facility
- 12.31 Warning and alarm system faults
  - 12.31 General
  - 12.32 Line fault
  - 12.33 Communication/wiring fault
  - 12.34 Mains power failure
  - 12.35 Standby battery
  - 12.36 Legend
- 12.37 Indicator panel requirements for all systems
  - 12.37 Indicators
  - 12.40 Labelling
  - 12.41 Construction
  - 12.48 Remote audible sounder
- 12.49 Central indicator panel requirements
  - 12.49 Displays
  - 12.50 Mute functions
  - 12.53 Panel legend and display
- 12.54 Repeater indicator panel requirements
  - 12.54 Displays
  - 12.55 Mute functions
  - 12.58 Panel legend and display
- 12.59 Area warning and alarm panel
  - 12.54 Displays
  - 12.60 Mute functions
  - 12.62 Panel legend and display
  - 12.63 Location

**13.0 Pipeline installation** *page 126*

- 13.1 Accommodation of pipes
- 13.9 Pipeline materials
  - 13.10 Quality
  - 13.12 Pipes
  - 13.14 Other fittings
- 13.15 Cleaning
  - 13.15 Pipes

|             |                                                          |        |                                                                                        |
|-------------|----------------------------------------------------------|--------|----------------------------------------------------------------------------------------|
| 13.16       | Pipe joining fittings                                    | 15.43  | Cross-connection                                                                       |
| 13.18       | Pipeline jointing                                        | 15.44  | Requirements for pipeline system tests                                                 |
| 13.18       | General                                                  | 15.44  | Leakage from total compressed medical gas systems                                      |
| 13.27       | Jointing methods                                         | 15.49  | Leakage into total vacuum systems                                                      |
| 13.30       | Pipe preparation                                         | 15.50  | Closure of area valve service units                                                    |
| 13.31       | Use of N <sub>2</sub> internal inert gas shield          | 15.54  | Zoning of AVSUs and terminal unit identification                                       |
| 13.31       | Application                                              | 15.58  | Cross-connection                                                                       |
| 13.33       | Safety                                                   | 15.63  | Flow and pressure drop at terminal units                                               |
| 13.34       | Control cylinders                                        | 15.64  | Mechanical function of terminal units                                                  |
| 13.35       | Other installation processes                             | 15.65  | Gas specificity of terminal units                                                      |
| 13.36       | Inspection of joins                                      | 15.66  | NIST connectors                                                                        |
| 13.37       | Internal cleanliness                                     | 15.68  | Performance tests of the pipeline system                                               |
| 13.38       | Penetration                                              | 15.72  | Functional tests of supply systems                                                     |
| 13.39       | Capping                                                  | 15.74  | Pressure safety valves                                                                 |
| 13.40       | Removal of flux residues and oxides                      | 15.76  | Warning systems                                                                        |
| 13.45       | Purging with the working gas                             | 15.78  | Verification of as-fitted drawings                                                     |
| 13.46       | Pipe supports                                            | 15.79  | Filling with medical air                                                               |
| 13.52       | Identification of pipelines                              | 15.86  | Purging and filling with specific gases                                                |
| 13.54       | Pipeline fittings                                        | 15.88  | Quality of compressed medical gas systems                                              |
| 13.54       | General                                                  | 15.88  | General                                                                                |
| 13.55       | Ceiling pendant fittings rigid, multi-purpose type       | 15.95  | Particulate matter                                                                     |
| 13.61       | Flexible pendant fitting                                 | 15.97  | Oil                                                                                    |
| 13.62       | Bed head trunking/walling system                         | 15.99  | Water                                                                                  |
| 13.67       | Shut-off valves                                          | 15.101 | Carbon monoxide                                                                        |
| 13.68       | Provision of valves                                      | 15.102 | Carbon dioxide                                                                         |
| 13.70       | Area valve service units (AVSUs)                         | 15.104 | Nitrogen                                                                               |
| 13.75       | Provision of AVSUs                                       | 15.105 | Pipeline odour                                                                         |
| 13.75       | General                                                  | 15.106 | Gas identification                                                                     |
| 13.79       | Labelling                                                | 15.111 | Requirements before a MGPS system is taken to use                                      |
| 13.81       | Pressure sensors                                         | 15.111 | General                                                                                |
| 13.82       | Pressure gauges                                          | 15.115 | Operational policy                                                                     |
| 13.83       | Test points                                              | 15.116 | Cylinder storage and handling                                                          |
| 13.84       | Emergency inlet port                                     | 15.117 | Removal of construction labels                                                         |
| 13.86       | Line pressure alarms and safety valves                   | 15.118 | Anaesthetic gas scavenging systems                                                     |
|             |                                                          | 15.118 | General                                                                                |
| <b>14.0</b> | <b>Accommodation</b> <i>page 138</i>                     | 15.123 | Performance tests: disposal systems                                                    |
| 14.1        | Design and construction of plantrooms                    | 15.123 | Powered device                                                                         |
| 14.1        | Location of plantrooms                                   | 15.125 | Pipework/ductwork installation                                                         |
| 14.7        | Access                                                   | 15.127 | Performance testing                                                                    |
| 14.11       | Construction and layout of manifold rooms                | 15.139 | Receiving system                                                                       |
| 14.14       | Heating and ventilation of plantrooms                    | 15.134 | Performance efficiency                                                                 |
| 14.22       | Lighting                                                 | 15.140 | Methods and procedures for validation and verification of medical gas pipeline systems |
| 14.23       | Noise control                                            | 15.140 | General                                                                                |
|             |                                                          | 15.146 | Labelling and marking                                                                  |
| <b>15.0</b> | <b>Validation and verification</b> <i>page 141</i>       | 15.148 | Sleeving and supports                                                                  |
| 15.1        | General                                                  | 15.150 | Leakage                                                                                |
| 15.14       | Summary of tests                                         | 15.154 | Cross-connection                                                                       |
| 15.14       | Tests and checks on the pipeline carcass                 | 15.157 | Leakage from compressed medical gas systems                                            |
| 15.15       | Test on the pipeline system                              | 15.160 | Leakage into vacuum system                                                             |
| 15.16       | Tests before use                                         | 15.163 | Closure of AVSUs                                                                       |
| 15.17       | General requirements for testing                         | 15.166 | Zoning of AVSUs                                                                        |
| 15.17       | General                                                  | 15.170 | Cross-connection                                                                       |
| 15.29       | Modifications, extensions or repairs to existing systems |        |                                                                                        |
| 15.37       | Requirements for pipeline carcass tests                  |        |                                                                                        |
| 15.37       | Labelling and marking                                    |        |                                                                                        |
| 15.38       | Sleeving and supports                                    |        |                                                                                        |
| 15.39       | Leakage                                                  |        |                                                                                        |



- 15.174 Functional tests of terminal units
- 15.176 Performance tests of the pipeline system
- 15.179 System supply tests
- 15.184 Safety valve inspection
- 15.187 Warning system tests
- 15.191 Verification of drawings
- 15.193 Filling with medical air
- 15.197 Purging and filling with specific gas
- 15.200 Tests for quality
- 15.203 Tests for gas identity
- 15.206 System taken into use

**Appendix A – Testing, commission and filling for use:  
Forms to be completed during testing and  
commissioning of piped medical gases systems**  
*page 173*

**Appendix B – Gas pressure variation with  
temperature** *page 191*

**Appendix C – Pressure drop test device** *page 192*

**Appendix D – Membrane filter test device** *page 194*

**Appendix E – Equipment for contaminant testing**  
*page 196*

**Appendix F – Equipment for gas identification**  
*page 197*

**Appendix G – Procedures for measuring the design  
flow of vacuum plant** *page 199*

**Appendix H – Procedure for measuring pipeline  
volume** *page 200*

**Appendix J – Pressure loss data** *page 202*

**Appendix K – Pressure regulation for 400 kPa  
(medical gases and medical air) and 700 kPa systems  
(surgical air)** *page 208*

**References** *page 211*

**Other publications in this series** *page 213*

**About NHS Estates** *page 214*



# 1.0 Scope

## Guidance in this document

**1.1** Guidance in this volume of Health Technical Memorandum (HTM) 2022 covers piped medical gases, medical compressed air and medical vacuum installations, and applies to all medical gas pipeline systems (MGPS) installed in healthcare premises.

**1.2** An MGPS is installed to provide a safe, convenient and cost-effective system for the provision of medical gases to the clinical and nursing staff at the point of use. It reduces the problems associated with the use of gas cylinders such as safety, portage, storage and noise.

**1.3** The guidance given in this volume should be followed for all new installations and refurbishment or upgrading of existing installations.

**1.4** It is not necessary to apply the guidance retrospectively unless patient or staff safety would be compromised. In this case, the guidance given in this volume should be followed.

**1.5** Existing installations should be assessed for compliance with this volume. A plan for upgrading the existing system should be prepared, taking account of the priority for patient safety. Managers will need to liaise with medical colleagues and take account of other guidance published by the Department of Health in order to assess the system for technical shortcomings.

## Other guidance

**1.6** Guidance on the provision of MGPS is given in the Health Building Notes.

## Design, installation and testing

**1.7** This volume of HTM 2022 deals with the issues involved in the design, installation and testing of an MGPS.

**1.8** The standard specification, Model Engineering Specification C11, supports this HTM. C11 provides details of the extent of the works required and is a procurement specification.

**1.9** Whenever appropriate, British Standard specifications should be used.

## 2.0 General principles

### General statement

- 2.1** An MGPS is designed to provide a safe and effective method of delivering the required medical gas from the source of supply through a pipeline system to the patient via a terminal unit.
- 2.2** Each medical gas must be supplied from a separate system, and it is essential that all parts of each system are gas specific to ensure that there is no possibility of cross-connection between any system. A schematic diagram of a typical MGPS is shown in volume 1 of this HTM, 'Operational management' (Figure 1).
- 2.3** Systems for dental air and vacuum are covered in HTM 2022 Supplement 1, 'Dental compressed air and vacuum systems', since the requirements are different. However, where anaesthetic gases are administered in dental departments, the guidance given in this HTM should be followed.
- 2.4** During the installation stage, extensive tests are carried out to verify that there is no cross-connection.
- 2.5** Where medical air 400 kPa is to be used for testing surgical tools and other medical equipment, this requirement should be considered at the design stage to ensure that sufficient capacity is available. Details of design flows are given in Chapter 4 "Gas flow".
- 2.6** MGPS should not be used to supply pathology departments, general workshops or mechanical services. The 400 kPa medical air system may, however, be extended to those departments where respiratory equipment or surgical tools are serviced, such as in sterile disinfection units (SDUs), electronic and biomedical equipment (EBME) workshops etc. In such cases only, to facilitate the testing and checking of operation of equipment for the different medical gases, all terminal units (excluding vacuum) may be connected to the medical air supply and be provided with simplified alarm facilities and labelled accordingly.
- 2.7** Separate installations should be provided for pathology and general laboratories and workshops, although it is recommended that they are constructed to the same specification as MGPS. They should not be provided with medical gas terminal units. Piped medical vacuum systems are not recommended for infectious disease units.

### Quality requirements for medical gases and air

- 2.8** Medical gases supplied from cylinder or liquid sources comply with the appropriate sections of the current edition of the European Pharmacopoeia (Ph Eur). There is currently no Ph Eur for site-generated medical air and oxygen pressure swing adsorber (PSA) systems. The quality specification for medical air is as given in Table 1.

**2.9** The introduction of the new Ph Eur for medical air will be effective from 1998 and therefore medical air will need to comply with this new specification. The Ph Eur also specifies validation protocols which will need to be adopted.

**2.10** The quality of piped medical compressed air, the particulate content, dryness and concentration of impurities, should comply with the requirements for maximum concentrations given in Table 1, which is based on the specification for breathing air in BS EN 132:1991. Information on testing procedures is given in Chapter 15, 'Validation and verification'.

*Table 1* Quality specification for medical air  
(for the requirement for dental compressed air refer to the relevant supplement)

| Parameter                             | Specification                                                                        |
|---------------------------------------|--------------------------------------------------------------------------------------|
| Oxygen                                | 20.9 +/-1.0%                                                                         |
| Nitrogen                              | 78% by inference                                                                     |
| Particulate contamination             | Practically free from visible particles in a 75 l sample                             |
| Water content<br>– see paragraph 2.13 | 115 vpm (0.095 mg/l)<br>(equivalent to dewpoint<br>–40°C at atmospheric<br>pressure) |
| CO                                    | 5 ppm v/v                                                                            |
| CO <sub>2</sub>                       | 500 ppm v/v                                                                          |
| Oil content (droplet or mist)         | <0.5 mg/m <sup>3</sup>                                                               |
| Odour<br>– see paragraph 2.11         | none                                                                                 |

**Note:** Similar values apply to other medical gases; see relevant paragraph(s) in appropriate Ph Eur monograph.

## Odour and moisture

### Odour

**2.11** The odour threshold of measurable particulate matter is approximately 0.3 mg/m<sup>3</sup>.

**2.12** Some elastomeric materials, such as those commonly used in flexible hose, may have a distinctive odour, particularly when new. Extensive tests have shown that the agents likely to be responsible for the odour are present only in minute (parts per billion) quantities and are considered to be of no toxicological significance. Clearly the odour should not be nauseous.

### Moisture

**2.13** Similarly, those elastomeric materials have been shown to desorb minute quantities of moisture into the gas stream. The amounts of moisture

## 2.0 General principles

are very small but, on initial testing, may result in moisture levels slightly in excess of 0.095 mg/l. These slightly raised levels of moisture may persist on initial testing for several months. Extensive tests have shown that these slightly raised levels are of no consequence, and reduce following purging with the working gas or use of the system.

**2.14** Bacteria filters should be included in medical compressor systems to reduce the risk of delivering spores or other infectious material to vulnerable patients.

**2.15** Micro-organisms can penetrate a bacteria filter if the material is wet. Therefore it is essential that the dryness of the medical air supplied to a bacteria filter is checked regularly (at least every three months) at the test point, using the test equipment specified in Chapter 15.

## Pipeline distribution system design

**2.16** The following general information is required in order to design an MGPS:

- a. schedule of provision of terminal units;
- b. design flow rates and pressure requirements at each terminal unit;
- c. diversified flows for each section of the pipeline system;
- d. total flow.

**2.17** Guidance on deriving and calculating the above parameters is given in chapters 3 and 4 of this volume.

**2.18** The definition of "departments", which may comprise several wards, treatment rooms etc, should be agreed at the project design stage to avoid confusion.

## Safety

**2.19** The safety of MGPS is dependent on four basic tenets:

- a. identity;
- b. adequacy;
- c. continuity;
- d. quality of supply.

**2.20** Identity is assured by the use of gas-specific connections throughout the pipeline system, including terminal units, connectors, etc, and by the adherence to strict testing and commissioning procedures of the system.

**2.21** Adequacy of supply depends on an accurate assessment of demands and the selection of plant appropriate to the clinical/medical demands on the system.

**2.22** Continuity of supply is achieved by the specification of a system which (with the exception of liquid oxygen systems which may include a secondary vessel) have duplicate components, and by the provision of an adequate emergency/reserve supply for all systems except vacuum; by the provision of alarm systems, and by connection to the emergency power supply system.

Anaesthetic gas scavenging systems (AGSS) and high-pressure surgical air systems are not considered as life-support systems and therefore duplicate components and, in the case of the latter, an emergency/reserve supply system, are not normally required. For operational reasons, reserve air cylinders complete with regulators are usually available for surgical tools in operating departments.

**2.23** Quality of supply is achieved by the use of gases purchased to the appropriate Ph Eur requirements or produced by plant performing to specified standards, by the maintenance of cleanliness throughout the installation of the system, and by the implementation of the various testing and commissioning procedures.

## Installation/supply of equipment/maintenance

*The concept of the existing Quality Assurance BSI Scheme schedule QAS 3720.1/206./A1 is currently under review. Further guidance will be given when appropriate.*

**2.24** The installation of MGPS should only be carried out by specialist firms registered to BS EN ISO 9000 with scope of registration appropriately defined.

## Modifications

**2.25** Special precautions are required when existing installations are to be modified or extended to ensure that all sections of the pipeline system remaining in use are not contaminated, and that the supply to patients is not compromised. The section to be modified should be physically isolated from the section in use. Closure of isolating valves is insufficient for this purpose. Where area valve service units (AVSUs) have been installed the blanking spades should be used. This isolation procedure is not required when work is to be carried out on individual terminal units.

**2.26** Modification of existing systems may be detrimental to the overall performance of the system. In the case of older systems there may be insufficient capacity to permit the system to operate safely with the flows typically encountered in use today.

**2.27** Any work involving alteration, extension or maintenance work on an existing system should be subject to the permit-to-work procedure (see the 'Operational management' volume of this HTM).

## Removal of pipework

**2.28** Removal and cutting out of redundant medical gas pipelines and equipment can present as great a hazard to patient safety as any other modification. All such removal, including cutting into existing pipelines, capping off **and removal of redundant pipeline** and equipment, should only be carried out by specialist medical gases contractors. It should not be carried out by demolition contractors.

## Validation and verification

**2.29** The objective of validation and verification is to ensure that all the necessary safety and performance requirements of the MGPS will be met. Validation and verification procedures will be required for new installations,

additions to existing installations and modifications to existing installations. The scope of work will dictate the specific programme required. This is described in more detail in Chapter 3, "Provision of terminal units".

## General fire precautions

### General

**2.30** The siting and general structural principles for the design of liquid oxygen storage accommodation are given in Chapter 4 "Liquid oxygen supplies and VIEs" and the requirements for plantrooms and gas manifold rooms in Chapter 14 "Accommodation".

**2.31** Guidance on cylinder storage and handling is given in the 'Operational management' volume of this HTM.

### Fire detection system

**2.32** Smoke or heat detector heads should be installed in the plantrooms, medical gases manifold rooms and (when internal) medical gases cylinder stores in any hospital having a fire detection system in accordance with HTM 82 'Firecode alarm and detection systems'.

## Electricity supply to medical gas installations

### General

**2.33** The whole of the electrical installation should be carried out in accordance with the extant edition of the IEE Regulations for Electrical Installations.

**2.34** The electricity supply to medical gas installations should be taken from separate circuits from a distribution board which is an "essential" board fed by the emergency generator system. This should also apply to the medical gas alarms. Reference should be made to HTM 2011 'Emergency electrical services'.

**2.35** Care is required when selecting pipeline routes to prevent the pipes coming into contact with electric cables and wiring, and to minimise the risk of electric shock in the event of a fault on adjacent cables.

**2.36** The final connection to any equipment, for example alarm panels or control panels, should be made via an unswitched fused connection unit.

**2.37** In the event of power failure or interruption, all systems should continue to operate exactly as before the interruption occurred. For example, except for automatic cycling compressors, dryers, pumps etc, the same compressor and dryer (or vacuum pump) set should be on-line, and for manifold systems the same bank should be running.

**2.38** All electrical systems, including plant control systems, should be designed in accordance with EMC Directives to reject spurious radio frequency (RF) or mains noise typically occurring in hospitals, examples being diathermy



equipment and current spikes caused by plant start-up. Reference should be made to HTM 2014 'Abatement of electrical interference'.

**2.39** These systems should also be compatible with emergency electrical supply systems which may be either non-interruptible or interruptible with variable changeover delays.

### Earthing

**2.40** Pipelines should be bonded to the consumer's earth terminal as required by Regulation 413-2 of the IEE Regulations. This bonding should be made as near as possible to the point at which the pipeline enters the building from the plant. The size of the bonding conductor should be in accordance with Table 54f of the Regulations. The pipelines should not themselves be used for earthing the electrical equipment.

**2.41** Flexible pipeline connections between the compressors or vacuum pumping plant and the fixed pipelines should be bonded across to comply with this requirement. Flexible connections in the fixed pipelines should not normally be used, but if they are specially approved they should be similarly bonded across.

### Installation of electrical cables

**2.42** Distribution pipelines should preferably be physically separated from the metal sheath and armour of electric cables, as well as from metal conduits, ducts and trunking and bare earth-continuity conductors associated with any electric cables which operate at low voltage or above. Reference should be made to HTM 2007 'Electrical services: supply and distribution'.

**2.43** When physical separation is impracticable, or where there might be contact with extraneous metal work, for example, where the pipes are carried in metal partitions or where terminal units are mounted on metal bed-head units, the pipelines should be effectively bonded to the metal work in accordance with Regulations 525-10 of the IEE Regulations.

**2.44** Where piped gases and electric wiring are enclosed in a boom, gas control panel or other similar enclosure, the wiring should be carried in separate conduit or trunking so that it cannot come into direct contact with the piped gas installation. Where this is not possible, the wiring should be secured in the most effective manner possible, clear of the medical gas pipes. The cables should comply with IEE Regulation 523-17.

### Electrical wiring in plantrooms

**2.45** All electrical wiring in these rooms should be carried out using MICS cable or cable of the type indicated in IEE Regulation 523-17, with adequate protection against mechanical damage.

**2.46** Fire-resistant cable conforming to BS 6387, PVC armoured cables, and single insulated cables in conduit may also be used.

**2.47** Each compressor, vacuum pump and manifold should be supplied from a separate sub-circuit.

**2.48** Metal-clad sockets, connection units and switches should be used in plantrooms; plastic fittings are not appropriate.

## Electrical supply pendants

### Ceiling pendant fittings – rigid, multi-purpose type

**2.49** The construction should provide segregation of low voltage, functional extra-low voltage (FELV) electrical services by means of flexible partitions or conduit, as appropriate. Access to “live” components should be via panels which are removable by means of tools only.

### Bed-head trunking/walling system

**2.50** These fittings should generally be in accordance with HTM 2015 ‘Bedhead services’. Separate compartments should be provided for electrical services, nurse call/radio etc and medical gas pipelines.

## 3.0 Provision of terminal units

### General

**3.1** A typical schedule of provision of terminal units is given in Table 2. Medical treatment policy is evolutionary, and therefore the project team should review the requirements for individual schemes.

**3.2** Terminal units should be mounted in positions which give the shortest practicable routes for flexible connecting assemblies, between the terminal unit and apparatus. Terminal units may be surface or flush mounted. They may also be incorporated with electrical services, nurse call systems and TV and radio audio services, in proprietary fittings such as bedhead trunking, wall panel systems and theatre pendant fittings, etc. Refer also to HTM 2015 'Bedhead services'.

**3.3** When planning the installation of theatre pendant fittings, the location of the operating luminaire and other ceiling-mounted devices should be taken into consideration. When the operating room is provided with an ultra-clean ventilation (UCV) system, it may be more practicable (and cost-effective) to have the services (both medical gas and electrical) incorporated as part of the UCV system partial walls.

**3.4** The following installations are strongly deprecated:

- a. floor-mounted terminal units;
- b. vacuum systems in which body or other fluids are drawn through a fixed pipeline connecting a terminal unit or other connector to a remote vacuum jar.

**3.5** All terminal units should conform to BS 5682:1984 (1992). Terminal units intended for installation with the socket axis horizontal, ie wall mounted, include a non-swivel device so that directly connected equipment such as flow meters remain vertical; terminal units intended for installation with the socket axis vertical, for example in certain types of pendant, do not include a non-swivel device. Secondary locks are no longer included in terminal units.

**3.6** An anaesthetic gas scavenging (AGS) terminal unit should be provided whenever nitrous oxide is available for anaesthetic procedures. In recovery areas, when nitrous oxide is not provided, where there is no primary source of anaesthetic gas pollution and/or where nitrous oxide is used for analgesic purposes only, no anaesthetic gas scavenging system (AGSS) is required. Where nitrous oxide is provided for analgesic purposes, scavenging is not practicable and pollution should be controlled by mechanical ventilation. Details of ventilation requirements are given in the appropriate Health Building Notes and Design Guides.

**3.7** The terminal unit (AGS) is specified in BS 6834: 1992, British Standard for Active Anaesthetic Gas Scavenging Systems. AGSS are covered in Chapter 10.

**3.8** If nitrous oxide is provided in the equipment service room or workshop, an appropriate AGSS must also be provided.

*Reference should be made to EL(96)33 covering publication advice on the implementation of the Health & Safety Commission's 'Occupational Exposure Standards for Anaesthetic Agents' published by the Department of Health, March 1996. Further guidance is given in 'Anaesthetic agents: Controlling exposure under COSHH', prepared by the Health Services Advisory Committee, ISBN 0-7176-1043-8*

### 3.0 Provision of terminal units

**3.9** Medical quality compressed air should be available to at least one workstation in the equipment service room and workshop. Terminal units in accordance with BS 5682:1984 (1992) should be provided. The supply should be taken from the medical air pipeline wherever possible.

**3.10** Where an anaesthetic equipment testing area is provided, it will be necessary to provide medical gases for the testing and calibration of anaesthetic equipment. A full range of medical gas terminal units will be required, but wherever possible, medical air should be used for testing purposes. If medical air is provided instead of the medical gas, the terminal units must be clearly labelled to prevent confusion: "TEST PANEL – GAS TERMINAL UNITS CONNECTED TO 4-BAR MEDICAL AIR ONLY".

**3.11** Where gas mixers (blenders) are to be tested, it will be necessary to provide the appropriate gases. These may be provided either from the MGPS or from cylinders.

**3.12** The specific and special requirements for nitric oxide pipeline systems are covered separately in Chapter 11.

**3.13** Where an array of terminal units is provided at a location, they should be arranged as follows:

- a. for a horizontal array, when viewed from the front, left to right: oxygen, nitrous oxide, nitrous oxide/oxygen mixture (50% v/v), medical air 4-bar, surgical air 7-bar, vacuum, anaesthetic gas scavenging, nitric oxide, oxygen/carbon dioxide mixture:

$O_2$ ,  $N_2O$ ,  $N_2O/O_2$ , MA-4, SA-7, VAC, AGS, NO,  $O_2/CO_2$

- b. for a vertical array, with oxygen at the top and in the sequence as for a horizontal array. In many cases a vertical array is impracticable and a more convenient arrangement will comprise a number of rows, for example:

$O_2$   $N_2O$  and/or  $N_2O/O_2$

MA-4, SA-7, VAC, AGS, NO,  $O_2/CO_2$ ;

- c. for a circular array, for example where terminal units are installed on the undersurface of a pendant, with the sequence as for a horizontal array, in a clockwise direction when viewed from below. The AGS terminal unit may occupy the centre of such an array.

**3.14** Mounting heights for terminal units should be between 900 mm and 1400 mm above finished floor level (FFL) when installed on walls or similar vertical surfaces.

**3.15** When installed in pendants or similar, terminal units should be of a type suitable for mounting within the specified fitting.

**3.16** Pressure losses across terminal units should be in accordance with BS 5682:1984. (The standard does not give pressure loss data for surgical air at 350 l/min – but see Table 4.

Table 2 Scale of provision of terminal units

| Department                                                                                                        | O <sub>2</sub> | N <sub>2</sub> O | N <sub>2</sub> O/O <sub>2</sub> | MA4 | SA7 | VAC | AGSS |
|-------------------------------------------------------------------------------------------------------------------|----------------|------------------|---------------------------------|-----|-----|-----|------|
| <b>Accident and emergency department</b>                                                                          |                |                  |                                 |     |     |     |      |
| Resuscitation room                                                                                                |                |                  |                                 |     |     |     |      |
| per trolley space                                                                                                 | 1              | 1                | –                               | 1   | –   | 1   | 1    |
| Major treatment/plaster room                                                                                      |                |                  |                                 |     |     |     |      |
| per trolley space                                                                                                 | 1              | 1                | 1p                              | 1   | 1p  | 1   | 1    |
| Post-anaesthesia recovery                                                                                         |                |                  |                                 |     |     |     |      |
| per trolley space                                                                                                 | 1              | –                | –                               | 1p  | –   | 1   | –    |
| Treatment room/cubicle                                                                                            | 1              | –                | –                               | –   | –   | 1   | –    |
| <b>Operating department</b>                                                                                       |                |                  |                                 |     |     |     |      |
| Anaesthesia room                                                                                                  | 1              | 1                | –                               | 1   | –   | 1   | 1    |
| Operating theatre                                                                                                 |                |                  |                                 |     |     |     |      |
| Anaesthetist                                                                                                      | 1              | 1                | –                               | 1   | 1p  | 2   | 1    |
| Surgeon                                                                                                           | 1              | 1                | –                               | 1   | 1p  | 2   | 1    |
| Post-anaesthesia recovery                                                                                         |                |                  |                                 |     |     |     |      |
| per bed space                                                                                                     | 1              | –                | –                               | 1   | –   | 1   | –    |
| Equipment service room                                                                                            |                |                  |                                 |     |     |     |      |
| per work space                                                                                                    | 1              | 1                | –                               | 1   | 1p  | 1   | 1    |
| <b>Maternity department</b>                                                                                       |                |                  |                                 |     |     |     |      |
| Delivery suite                                                                                                    |                |                  |                                 |     |     |     |      |
| Normal delivery room                                                                                              |                |                  |                                 |     |     |     |      |
| Mother                                                                                                            | 1              | –                | 1                               | –   | –   | 1   | –    |
| Baby                                                                                                              | 1              | –                | –                               | 1   | –   | 1   | –    |
| Abnormal delivery room                                                                                            |                |                  |                                 |     |     |     |      |
| Mother                                                                                                            | 1              | 1                | 1                               | 1   | –   | 2   | 1    |
| Baby                                                                                                              | 1              | –                | –                               | 1   | –   | 1   | –    |
| Operating suite                                                                                                   |                |                  |                                 |     |     |     |      |
| Anaesthesia room                                                                                                  | 1              | 1                | –                               | 1   | –   | 1   | 1    |
| Operating theatre                                                                                                 |                |                  |                                 |     |     |     |      |
| Anaesthetist                                                                                                      | 1              | 1                | –                               | 1   | –   | 1   | 1    |
| Obstetrician                                                                                                      | –              | –                | –                               | –   | –   | 1   | –    |
| Paediatrician                                                                                                     |                |                  |                                 |     |     |     |      |
| per cot space (*)                                                                                                 | 1              | –                | –                               | 1   | –   | 1   | –    |
| Post-anaesthesia recovery                                                                                         |                |                  |                                 |     |     |     |      |
| per bed space                                                                                                     | 1              | –                | –                               | 1   | –   | 1   | –    |
| Equipment service room (**)                                                                                       |                |                  |                                 |     |     |     |      |
| per work space                                                                                                    | 1              | 1                | 1                               | 1   | –   | 1   | 1    |
| Neonatal unit                                                                                                     |                |                  |                                 |     |     |     |      |
| per cot space                                                                                                     | 2              | –                | –                               | 2   | –   | 2   | –    |
| Equipment service room (**)                                                                                       |                |                  |                                 |     |     |     |      |
| per work space                                                                                                    | 1              | –                | –                               | 1   | –   | 1   | –    |
| (*) provision for 2 cots only, irrespective of number of cot spaces                                               |                |                  |                                 |     |     |     |      |
| (**) Where the Delivery Suite and Neonatal Unit are in close proximity, one equipment service room can be shared. |                |                  |                                 |     |     |     |      |
| <b>In-patient accommodation</b>                                                                                   |                |                  |                                 |     |     |     |      |
| Single bedroom                                                                                                    | 1              | –                | –                               | –   | –   | 1   | –    |
| Multi bedroom                                                                                                     |                |                  |                                 |     |     |     |      |
| per bed space                                                                                                     | 1              | –                | –                               | –   | –   | 1   | –    |
| Nursery                                                                                                           |                |                  |                                 |     |     |     |      |
| per cot space (*)                                                                                                 | 1              | –                | –                               | –   | –   | 1   | –    |
| (*) provision for 2 cots only, irrespective of number of cot spaces                                               |                |                  |                                 |     |     |     |      |

p = project team option

### 3.0 Provision of terminal units

Scale of provision of terminal units

| Department                                                 | O <sub>2</sub> | N <sub>2</sub> O | N <sub>2</sub> O/O <sub>2</sub> | MA4 | SA7 | VAC | AGSS |
|------------------------------------------------------------|----------------|------------------|---------------------------------|-----|-----|-----|------|
| <b>Radiology department</b>                                |                |                  |                                 |     |     |     |      |
| Special procedures room                                    | 1              | 1                | -                               | 1   | -   | 1   | 1    |
| Anaesthesia room                                           | 1              | 1                | -                               | 1   | -   | 1   | 1    |
| Holding and recovery                                       | 1              | -                | -                               | 1p  | -   | 1   | -    |
| Ultrasound                                                 | 1              | -                | -                               | -   | -   | 1   | -    |
| Fluoroscopy                                                | 1              | -                | -                               | -   | -   | 1   | -    |
| Urography                                                  | 1              | -                | -                               | -   | -   | 1   | -    |
| General purpose room                                       | 1              | -                | -                               | -   | -   | 1   | -    |
| Tomography                                                 | 1              | -                | -                               | -   | -   | 1   | -    |
| <b>In-patient accommodation #</b>                          |                |                  |                                 |     |     |     |      |
| Single bedroom                                             | 1              | -                | -                               | 1p  | -   | 1   | -    |
| Multi-bedroom                                              |                |                  |                                 |     |     |     |      |
| per bed space                                              | 1              | -                | -                               | 1p  | -   | 1   | -    |
| Treatment room                                             | 1              | -                | -                               | 1p  | -   | 1   | -    |
| # appropriate for adult acute, children and elderly people |                |                  |                                 |     |     |     |      |
| <b>Intensive therapy unit (ITU)</b>                        |                |                  |                                 |     |     |     |      |
| per bed space                                              | 2              | 2p               | 2p                              | 4   | -   | 4   | 2p   |
| Equipment service room                                     |                |                  |                                 |     |     |     |      |
| per work space                                             | 1              | 1p               | 1p                              | 1   | -   | 1   | 1p   |
| <b>Coronary care unit (CCU)</b>                            |                |                  |                                 |     |     |     |      |
| per bed space                                              | 2              | -                | -                               | 2p  | -   | 2   | -    |
| <b>Acute mental illness accommodation</b>                  |                |                  |                                 |     |     |     |      |
| ECT room                                                   | 1              | 1                | -                               | 1   | -   | 1   | 1    |
| Post-anaesthesia recovery                                  |                |                  |                                 |     |     |     |      |
| per bed space                                              | 1              | -                | -                               | 1p  | -   | 1   | -    |
| <b>Adult acute day care accommodation</b>                  |                |                  |                                 |     |     |     |      |
| Treatment room                                             |                |                  |                                 |     |     |     |      |
| Anaesthetist                                               | 1              | 1p               | -                               | 1p  | -   | 1   | 1p   |
| Surgeon                                                    | -              | -                | -                               | -   | -   | 1   | -    |
| Post-anaesthesia recovery                                  |                |                  |                                 |     |     |     |      |
| per bed space                                              | 1              | -                | -                               | 1p  | -   | 1   | -    |
| <b>Day patient accommodation</b>                           |                |                  |                                 |     |     |     |      |
| Single bedroom                                             | 1              | -                | -                               | -   | -   | 1   | -    |
| Multi-bedroom                                              |                |                  |                                 |     |     |     |      |
| per bed space                                              | 1              | -                | -                               | -   | -   | 1   | -    |
| Treatment room (p)                                         | 1              | -                | -                               | 1p  | -   | 1   | -    |
| Endoscopy room (p)                                         | 1              | 1p               | -                               | 1p  | -   | 1   | 1p   |
| <b>Fracture clinic</b>                                     |                |                  |                                 |     |     |     |      |
| Plaster room                                               | 1              | 1                | -                               | 1p  | 1p  | 1   | 1    |
| <b>Oral surgery, orthodontic department</b>                |                |                  |                                 |     |     |     |      |
| Consulting/treatment room                                  |                |                  |                                 |     |     |     |      |
| Type 1                                                     | 1              | 1p               | -                               | 1   | -   | 1   | 1p   |
| Consulting/treatment room                                  |                |                  |                                 |     |     |     |      |
| Type 2 and 3                                               | 1              | -                | -                               | 1   | -   | 1   | -    |
| Recovery room                                              |                |                  |                                 |     |     |     |      |
| per recovery position                                      | 1              | -                | -                               | -   | -   | 1   | -    |
| Appliance laboratory                                       |                |                  |                                 |     |     |     |      |
| per workstation                                            | -              | -                | -                               | -   | 1   | -   | -    |

**p = project team option**

## Scale of provision of terminal units

| Department                                       | O <sub>2</sub> | N <sub>2</sub> O | N <sub>2</sub> O/O <sub>2</sub> | MA4 | SA7 | VAC | AGSS |
|--------------------------------------------------|----------------|------------------|---------------------------------|-----|-----|-----|------|
| <b>Out-patient department</b>                    |                |                  |                                 |     |     |     |      |
| Treatment room                                   | 1              | 1p               | –                               | 1p  | –   | 1   | 1p   |
| <b>Sterile services department</b>               |                |                  |                                 |     |     |     |      |
| Washing room                                     | –              | –                | –                               | 1   | –   | –   | –    |
| Packing room                                     | –              | –                | –                               | –   | 1   | –   | –    |
| Medical equipment re-assembly<br>per workstation | 1              | –                | –                               | 1   | –   | 1   | –    |
| Medical equipment workroom<br>per workstation    | 1              | –                | –                               | 1   | –   | 1   | –    |

**p = project team option****Note:**

## 1. Nitric oxide

Terminal units for nitric oxide may be required as a project team option in intensive therapy units and neonatal units. In exceptional circumstances, nitric oxide may be required in operating departments. The level of provision would be two terminal units for each cot or bed space, and two terminal units per theatre.

## 2. Oxygen/carbon dioxide mixtures

Terminal units for oxygen/carbon dioxide mixtures may be required as a project team option in cardio-thoracic theatres and in oncology units.

*Where, in some ward areas, terminal units are installed in recesses behind covers/decorative panels etc, allow an additional 100 mm on each side of the outermost terminal units and 200 mm from centre to top of recess and 300 mm from centre to bottom of recess. The depth of the recess should be 150 mm.*

**3.17** Terminal units which are wall mounted should be located as follows:

- a. distance between centres of adjacent horizontal terminal units:
  - (i) 35 ± 2.5 mm for three or more terminal units;
  - (ii) 150 ± 2.5 mm for two terminal units only;

This should be sufficient for double flow meters to be used, for example between an oxygen terminal unit and a vacuum terminal unit serving two bed spaces;

- b. the distance between the centre of the terminal unit and a potential obstruction on either side (for example when installed in a corner) should be a minimum of 200 mm on either side.

## Terminal units for nitric oxide, oxygen/carbon dioxide mixture

**3.18** BS 5682 does not include a terminal unit for nitric oxide or oxygen/carbon dioxide mixture. In the absence of standards, the dimensions given in Table 3 are recommended. They are based on the diagrams and tables in BS 5682:1984 as follows:

*Table 3* Recommended probe dimensions for nitric oxide and oxygen/carbon dioxide mixture (CO<sub>2</sub> less than 5%) and NIST dimensions for nitric oxide

Figure 2 Probe and Table 3 from BS 5682

Diameters of probes

| Service                                               | Identification symbol           | Diameter C | Diameter D |                               |
|-------------------------------------------------------|---------------------------------|------------|------------|-------------------------------|
| Nitric oxide                                          | NO                              | 21.48      | 18.30      |                               |
|                                                       |                                 | 21.38      | 18.20      |                               |
| O <sub>2</sub> /CO <sub>2</sub> (CO <sub>2</sub> <5%) | O <sub>2</sub> /CO <sub>2</sub> | 25.00      | 21.83      | mixture (CO <sub>2</sub> <5%) |
|                                                       |                                 | 24.90      | 21.73      |                               |

Figure 5 Body of NIST connector and Table 6 from BS 5682

Diameters of body of NIST connectors

| Service      | Identification symbol | Diameter E  | Diameter F  |
|--------------|-----------------------|-------------|-------------|
| Nitric oxide | NO                    | 11.00 +0.11 | 14.00 +0.11 |
|              |                       | -0.0        | -0.0        |

Figure 6 Nipple of NIST connector and Table 7 from BS 5682

Diameters of nipples of NIST connectors

| Service      | Identification symbol | Diameter H  | Diameter J  |
|--------------|-----------------------|-------------|-------------|
| Nitric oxide | NO                    | 11.00 -0.05 | 14.00 -0.05 |
|              |                       | -0.16       | -0.16       |

## Nitrogen for surgical tools

**3.19** BS 5682 does not include a NIST for nitrogen. In the absence of a British Standard, the NIST connector allocated in ISO 5359 may be used.

**3.20** Where nitrogen is provided for surgical tools, the NIST connector is recommended with the "body" forming the wall outlet. To avoid the hazard of discharge of stored energy in low pressure, flexible, connecting assemblies, a limited leak check valve should be included in the nipple.



## 4.0 Gas flow

### General

**4.1** A schematic diagram of a typical MGPS is shown in the "Operational management" volume of this HTM. This diagram shows the pipeline distribution system from the gas source to the point of use that is the terminal units.

**4.2** There are three aspects of gas flow to consider when designing the pipeline distribution system:

- a. the flow which may be required at each terminal unit;
- b. the flow required in each branch of the distribution system (see the schematic, which shows a system with several main branches);
- c. the total flow, i.e. the sum of the flows in each branch.

**4.3** The pipeline system should be designed so that the design flows given in Table 4 can be achieved at each terminal unit.

**4.4** If all terminal units were in use simultaneously, excessively large pipelines and plant would be required. However, since not all terminal units are used simultaneously, it is necessary to apply a diversity factor to the flow in each branch of the system, to arrive at a realistic design flow.

**4.5** The diversity factors used are derived from the results of surveys of actual gas usage in typical hospitals.

**4.6** The total flow for the system is the sum of the diversified flows to each department.

**4.7** The design engineer should always ensure that due account is taken of the stated use of a particular department. For example, the number of terminal units in use for ward areas may be appropriate for a DGH, but the number may need to be increased for a specialist chest department. The pipeline is required, however, to meet the peak simultaneous demand and is designed accordingly. The source of supply will usually be required to deliver a lower continuous flow.

**4.8** It must be remembered that there is a limited range of pipe sizes, and that where there is any doubt about flow requirements, a larger pipe size should always be selected.

**4.9** All flows are in normal litres per minute (l/min) unless otherwise stated.

*At the design stage the project team should define the individual room/space required. The definitions which follow are generic and are not as detailed as those given in Table 2*

### Gas flow

#### Terminal unit flows

**4.10** The following formula is used to calculate the volume flow required in the pipeline at pressure  $P_g$  upstream of each terminal unit.

4.0 Gas flow

Table 4 Gas flow – flows required at terminal units

| Service                          | Location                              | Nominal pressure kPa <sup>e</sup> | Flows litres/min |                       |
|----------------------------------|---------------------------------------|-----------------------------------|------------------|-----------------------|
|                                  |                                       |                                   | Design flow      | Typical flow required |
| Oxygen                           | Theatres                              | 400                               | 100 <sup>a</sup> | 20                    |
|                                  | All other areas                       | 400                               | 10 <sup>c</sup>  | 6                     |
| Nitrous oxide                    | All areas                             | 400                               | 15               | 6                     |
| Nitrous oxide/<br>oxygen mixture | Delivery rooms                        | min                               | 275              | 20                    |
|                                  | All other areas                       | 310 <sup>b</sup><br>400           | 20               | 15                    |
| Medical air<br>400 kPa           | Theatres                              | 400                               | 40 <sup>c</sup>  | 40                    |
|                                  | ITU/neonatal                          | 400                               | 80 <sup>c</sup>  | 80                    |
|                                  | CCU                                   | 400                               | 80 <sup>c</sup>  | 80                    |
|                                  | Other                                 | 400                               | 20               | 10 <sup>c</sup>       |
| Surgical air/<br>nitrogen        | Theatres                              | 700                               | 350 <sup>d</sup> | 350                   |
| Vacuum                           | Theatres                              | 40                                | 40               | 40                    |
|                                  | Recovery                              | (300                              | 40               | 40                    |
|                                  | CCU                                   | mm Hg)                            | 40               | 40                    |
|                                  | Ward areas                            | below<br>atmospheric              | 40               | 40                    |
| Nitric oxide                     | ITU, neonatal<br>theatres             | 400                               | 15               | 6                     |
| Oxygen/carbon<br>dioxide mixture | Cardio-thoracic<br>theatres, oncology | 400                               | 100              | 40                    |

- a. During oxygen flush in operating and anaesthetic rooms.
- b. Minimum pressure at 275 l/min.
- c. These flows are for certain types of gas-driven ventilators under specific operating conditions, and nebulisers etc.
- d. Surgical tools/tourniquets.
- e. Pressure required at terminal unit, not in pipeline.

4.11 The flow Qa required at a terminal unit is expressed in terms of free air flow at standard temperature and pressure (STP). The relationship between volume flow Qa at STP and the volume flow Qg at the pipeline pressure (Pg) is:

$$Q_g = \frac{Q_a \cdot A_p}{P_g}$$

where Ap = atmospheric pressure  
Pg = pipeline pressure

4.12 The flows required at terminal units, as shown in Table 4, are design flows for each terminal unit; the actual pipeline distribution design will be based on the diversified flow rates derived using the methods described in the following paragraphs.

*For manual calculations based on Table 4, the volume flow is expressed in terms of free air flow Qa and it is, therefore, not necessary to calculate Qg*

## Pipeline flows

**4.13** Normally, because  $P_g$  is considered to be constant throughout the entire pipeline network, the volume flow  $Q_g$  required in the upstream branch of a T-junction is simply the sum of the volume flows in the downstream branches, that is:

$$Q_g = \sum_{a=1}^n Q_a \text{ for } a = 1 \dots n \text{ for } n \text{ branches}$$

**4.14** By simply adding the downstream flows in this way, the resultant total flow is higher than that found in practice and would result in unnecessarily large pipe sizes. Therefore, an allowance for diversity of flow is made.

**4.15** As discussed earlier, it is difficult to predict diversities accurately, but there are guidelines which can be used and these have been shown to be adequate in practice.

**4.16** For vacuum systems, the minimum vacuum should not fall below 300 mm Hg at each terminal unit at a flow of 40 l/m.

**4.17** The design of the pipework system is based on flows and acceptable pressure loss as shown in Table 4 to include terminal unit pressure loss given in Table 23, Chapter 15. The overall consumption may be lower in practice, but the systems would be capable of meeting the calculated demand within an acceptable range, that is, the design flow operating at a nominal pressure of 400 kPa.

**4.18** Departments usually comprise several ward units and treatment rooms. In order to avoid confusion, departments should be defined at the project design stage so that diversified flows may be calculated.

**4.19** Pressure requirements for surgical air are based on the requirement that the minimum pressure should be 700 kPa at this point of use, that is, the terminal unit at a flow of 350 l/min.

**4.20** Details of pressure requirements for all systems are given in Appendix K.

## Oxygen

### In-patient accommodation

**4.21** Oxygen is used at a typical flow of 5–6 litres/min. Each terminal unit should, however, be capable of passing 10 l/min (at STP) at a supply pressure of 400 kPa (nominal) as shown in Table 4, in case nebulisers or other respiratory equipment is used.

**4.22** The diversified flow to each six-bed room is calculated on the basis that 10 l/min will be required for the first terminal unit and that only 33% of the flow to the remainder at 6 l/min will be required. This is equivalent to a maximum of three terminal units in use simultaneously in a six-bed room.

**4.23** In a typical ward comprising four 6-bed rooms, four single-bed rooms and a treatment room, for the purpose of calculating the diversified flow  $Q_W$

#### 4.0 Gas flow

to the ward, the number of terminal units  $n$  used in Table 6 may be taken as the total number of terminal units in the ward.

**4.24** A department may comprise several ward units and treatment suites where appropriate. The diversified flow for each department, QD, is based on QW for the first ward unit, plus 50% of the flow for the remaining ward units. For the purposes of this calculation, the first ward unit can be taken as the largest ward unit within the department.

**4.25** The formula in Table 6 is based on the assumption that a department comprises a number of identical ward units; where this is not the case, the diversified flow is QW for the first (or largest ward unit) plus 50% of the total for the remaining ward units.

**4.26** If one ward unit is significantly larger than the others, average the flows from the ward units to obtain a more realistic flow.

#### Hyperbaric oxygen chambers

**4.27** Monoplace hyperbaric oxygen chambers for clinical purposes should be supplied from a separate branch. Typical flows for one-person chambers are as shown in Table 5.

Table 5 Gas flow hyperbaric chambers

|                                                                       | Max time for one complete treatment | Total consumption for max treatment time (litres) | Consumption for each additional minute $l/min$ |
|-----------------------------------------------------------------------|-------------------------------------|---------------------------------------------------|------------------------------------------------|
| O <sub>2</sub> atmosphere and recirculation                           |                                     |                                                   |                                                |
| • on open circuit                                                     | 2 hours                             | 30,000                                            | 250                                            |
| • on recirculation                                                    | 2 hours                             | 7250                                              | 40                                             |
| O <sub>2</sub> only; no recirculation                                 | 2 hours                             | 30,000                                            | 250                                            |
| O <sub>2</sub> delivery by built-in breathing mask and overboard pump | 2 hours                             | 1200                                              | 10                                             |
| O <sub>2</sub> delivery by built-in breathing hood and overboard pump | 2 hours                             | 7,200                                             | 60                                             |

#### Note:

1. The flows for a recirculating unit assume the standard method of operation is recirculation throughout the treatment. It is recommended that the pipeline should be designed for open circuit operation to ensure adequate flow under all conditions.
2. Clinical practice may require the inclusion of air during the treatment; it may also be necessary to switch to air in the unlikely event of an oxygen convulsion. Therefore consideration should be given to the provision of medical air.
3. Some hyperbaric chambers use air as a buffer and considerably less oxygen is consumed. The advice of the manufacturer should be sought.

Table 6 Oxygen diversified flows

| Department                                                  | Design flow for each terminal unit l/min | Diversified flow Q l/min                     |
|-------------------------------------------------------------|------------------------------------------|----------------------------------------------|
| <i>In-patient acute</i>                                     |                                          |                                              |
| Ward units – single and multi-bedrooms<br>Treatment rooms   | 10                                       | $QW = 10 + \frac{(n-1)6}{3}$                 |
| Each ward unit<br>Departments comprising several ward units | 10                                       | $QD = QW \left\{ \frac{1+(w-1)}{2} \right\}$ |
| ITU and CCU                                                 | 10                                       | $QI = 10 + (nB-1)6$                          |
| <i>Adult acute day care</i>                                 |                                          |                                              |
| Major treatment room                                        | 100                                      | $QT = 100 + 20(T-1)$                         |
| Endoscopy room                                              | 10                                       | $QR = 10 + (n-1)6$                           |
| Recovery room                                               | 10                                       | $QR = 10 + (n-1)6$                           |
| <i>Maternity department</i>                                 |                                          |                                              |
| Delivery suite                                              | 10                                       | $QM = 10 + \frac{(n-1)6}{2}$                 |
| Normal delivery room<br>Abnormal delivery room              | 100                                      | $QM = 100 + \frac{(n-1)6}{2}$                |
| Neonatal unit                                               | 10                                       | $QN = 10 + (n-1)6$                           |
| <i>Operating department</i>                                 |                                          |                                              |
| Operating room                                              | 100                                      | $QT = 100 + 20(T-1)$                         |
| Anaesthetic room                                            | 10                                       | $QA = 10 + (A-1)6$                           |

**Legend for all tables**

|       |                                                                      |
|-------|----------------------------------------------------------------------|
| n     | = number of terminal units                                           |
| nB    | = number of bed spaces                                               |
| W     | = number of ward units                                               |
| T     | = number of operating rooms or major treatment rooms                 |
| A     | = number of anaesthetic rooms                                        |
| S     | = number of operating suites (1 operating room + 1 anaesthetic room) |
| Q     | = diversified flow                                                   |
| QW    | = diversified flow to ward units                                     |
| QD    | = diversified flow to a department                                   |
| QI    | = diversified flow to ITU or CCU                                     |
| QT    | = diversified flow to operating room or major treatment room         |
| QA    | = diversified flow to anaesthetic rooms                              |
| QR    | = diversified flow to recovery rooms                                 |
| QM    | = diversified flow to maternity suite                                |
| QN    | = diversified flow to neonatal unit                                  |
| QB    | = diversified flow to baby bed space                                 |
| QDent | = diversified flow to dental department                              |
| QWS   | = diversified flow to equipment workshop                             |
| QP    | = diversified flow to plaster room                                   |

### Operating departments

**4.28** The diversified flow for operating departments is based on 100 l/min required for the oxygen flush. Therefore each oxygen terminal unit in the operating room and anaesthetic room should be able to pass 100 l/min. It is unlikely that an oxygen flush will be administered simultaneously in several operating rooms. The diversified flow, QT, is based on 100 l/min for the first operating room and 20 l/min for the remainder.

**4.29** For anaesthetic rooms, each terminal unit should be capable of passing 10 l/min, but the actual flow likely to be used is 6 l/min. The diversified flow is based on 10 l/min for the first room and 6 l/min for the remainder, since it is possible that all anaesthetic rooms may be in use simultaneously. Recovery is considered in a similar way, since again, it is possible that all bed spaces may be in use simultaneously. To obtain the flow to each operating suite, add the flows to the operating room and anaesthetic room, that is: 110 l/min.

**4.30** The need for an oxygen flush in anaesthetic rooms should be taken into account in the design. Assume one terminal unit in each department is in use with oxygen flush at any one time, irrespective of the overall number of operating suites.

**4.31** Major treatment rooms, A & E theatres, surgery and maternity operating departments should be treated as operating departments.

### Intensive therapy and coronary care units

**4.32** The diversified flow for these units assumes that all bed spaces may be occupied. Each terminal should be capable of delivering 10 l/min and the diversified flow is calculated assuming 10 l/min for the first bed space and 6 l/min for each of the remainder.

**4.33** Bed spaces are used instead of numbers of terminal units to calculate the diversified flow, since each bed space may have up to four (or more) terminal units associated with it.

**4.34** Oxygen should not be used as the driving gas for gas-powered ventilators if they are capable of being powered by medical air. The minimum flow characteristic which has proved adequate to drive current types of ventilator is 80 l/min at 360 kPa.

**4.35** If oxygen has to be used to power ventilators and/or ventilators are operating in continuous positive airway pressure (CPAP) mode, the high flows which may be encountered should be taken into account both when designing the pipeline and when sizing the vessel. These ventilators can use exceptional amounts of oxygen if set up incorrectly.

### Maternity

**4.36** For all normal delivery suites, the diversified flow is based on 10 l/min for the first terminal unit and 6 l/min for the remainder. In this case, terminal units are provided for both mother and baby and, therefore, the number of terminal units rather than rooms should be used to calculate diversified flow.

**4.37** For abnormal delivery suites, provision should be made for the oxygen flush in the same way as for the operating room. The abnormal delivery suite should be considered in the same way as the operating department.

**4.38** In the event of multiple births, the additional gas usage will have negligible effect on the total flow.

**4.39** The maternity operating suite should be considered in the same way as operating departments.

## Nitrous oxide

**4.40** Nitrous oxide is provided mainly for anaesthetic purposes and may be provided occasionally for analgesic purposes. In all cases each terminal unit should be capable of passing 15 l/min, but in practice the flow is unlikely to exceed 6 l/min.

**4.41** Therefore, for operating rooms and anaesthetic rooms allow 15 l/min for the first room and 6 l/min for the remainder.

**4.42** It must be assumed that where nitrous oxide terminal units are provided, they may all be in use simultaneously. Design and diversified flows for nitrous oxide are given in Table 7.

Table 7 Nitrous oxide diversified flows

| Department      | Design flow for each terminal unit l/min | Diversified flow Q l/min |
|-----------------|------------------------------------------|--------------------------|
| All departments | 15                                       | $Q = 15 + (nB-1)6$       |

nB = number of bed spaces or number of rooms as appropriate

## Nitrous oxide/oxygen mixture

**4.43** All terminal units should be capable of passing 275 l/min for a very short period to supply inhalationary gasps by the patient, and a continuous flow of 20 l/min. The actual flow would not normally exceed 20 l/min.

**4.44** The diversified flow in intensive therapy units and coronary care units is based on 20 l/min for the first bed space and 15 l/min for each of the remainder, since it is possible that nitrous oxide/oxygen mixtures could be administered at all bed spaces where provided.

**4.45** The diversified flow in delivery rooms is based on 275 l/min for the first bed space and 20 l/min for each of the remainder, of which only 50% will be in use simultaneously.

**4.46** Design and diversified flows for nitrous oxide/oxygen mixtures are given in Table 8.

Table 8 Nitrous oxide/oxygen mixtures design and diversified flows

| Department     | Design flow for each terminal unit l/min | Diversified flow Q l/min        |
|----------------|------------------------------------------|---------------------------------|
| Delivery rooms | 275                                      | $QM = 275 + \frac{20(nB-1)}{2}$ |
| Other areas    | 20                                       | $QI = 20 + 15(nB-1)$            |

## Medical air

### General

**4.47** Medical air is used to provide power for several types of equipment including surgical tools, ventilators and nebulisers. Oxygen should be avoided as a power source because of fire risk and cost, and should not be used where medical air is available, unless specifically recommended by the device manufacturer.

*BS 4272:Pt 3:1988 provides for auxiliary outlets on anaesthetic machines for both air and oxygen*

**4.48** Medical air should be provided at two different pressures:

- a. a pressure of 400 kPa is required to drive ventilators and for other respiratory applications;
- b. a higher pressure of 700 kPa is required to drive surgical tools. In this document, medical air at 700 kPa is referred to as surgical air to avoid confusion.

## Medical air 400 kPa

### General

**4.49** The use of medical air, particularly for respiratory use, has increased markedly in recent years. This service is the most critical of the medical gas services, since air-powered ventilators cease to operate in the event of failure of the supply.

**4.50** Medical air is also directly inhaled by patients during ventilation and it may also be used to dilute oxygen before administration because of the potentially toxic effects of pure oxygen.

**4.51** The supply system for medical air 400 kPa may be a manifold system, a compressor system or a proportioning system (synthetic air) and includes an emergency/reserve manifold. A compressor plant should always be specified where air-powered ventilators are to be used.

**4.52** One of the major uses of medical air is for patient ventilators. Patient ventilators fall into two main categories – those used during anaesthesia and those used during intensive therapy. Pneumatically powered ventilators can use up to 80 l/min free air continuously. The exact flow requirements will depend on the design of the ventilator. The flow and pressure requirements for some typical ventilators are given in Table 9.



**4.53** Current models of anaesthetic ventilators are very similar to intensive therapy models, and may require peak flows of up to 80 l/min and average flows of 20 l/min. Almost all such units are pneumatically driven and electronically controlled.

**4.54** Medical air 400 kPa is also used for other equipment such as anaesthetic gas mixers, humidifiers and nebulisers. The flow rates normally required would not exceed 10 l/min, and this flow is always in excess of the actual volume respired.

### Pressure requirements

**4.55** The minimum pressure required at terminal units for respiratory use is 355 kPa and all terminal units should be tested to ensure that the pressure does not fall below 355 kPa at flows of: 80 l/min in intensive therapy units and coronary care units; 40 l/min in special care bay units and operating suites; 20 l/min in ward areas.

*Table 9* Typical pressure and flow requirements for ventilators and nebulisers

| Ventilator type                                               | Pressure kPa                        | Flow l/min free air                                                        |
|---------------------------------------------------------------|-------------------------------------|----------------------------------------------------------------------------|
| Anaesthesia, typically gas driven, electronically controlled  | 300–700 <sup>1</sup><br>nominal 400 | Pneumatically driven ventilators use up to 80 l/min<br>20 l/min continuous |
| Intensive therapy<br>Electronically controlled<br>Gas powered | 300–700 <sup>1</sup><br>nominal 400 | 180 peak <sup>2</sup><br>80 continuous                                     |
| Neonatal – electronically controlled<br>Gas driven            | 300–700 <sup>1</sup><br>nominal 400 | 80 peak <sup>2</sup><br>40 continuous                                      |
| Nebulisers                                                    | 400                                 | 10                                                                         |

#### Notes:

1. It is strongly recommended that ventilators are not connected to the 700 kPa system since the blenders only work satisfactorily with a tolerance of about 10% on the differential pressure for air and oxygen, and incorrect mixtures could be obtained.
2. These flows can be achieved under certain clinical conditions. The peak flows are usually of very short duration.

**4.56** Medical air should not be used to supply mechanical services.

**4.57** Some medical gas pendants use the medical air supply for operating the control/retraction system. This is permitted, provided that:

- a. a flow limiting device is provided to protect the medical air system in the event of failure of any downstream component;
- b. a non-return valve is incorporated to protect the system integrity.

**4.58** The flow requirements should be ascertained and taken into account prior to the installation of the equipment.

### **In-patient accommodation**

**4.59** In ward areas and treatment rooms, all terminal units should be capable of passing 20 l/min, although typically 10 l/min will be required.

**4.60** The diversified flow to each six-bed room is calculated on the basis of numbers of terminal units and that only 33% of the flow at 10 l/min will be required for the remainder. This is approximately equivalent to a maximum of three terminal units in use simultaneously in a six-bed room.

**4.61** In a typical ward comprising four six-bed rooms, four single-bed rooms and a treatment room, for the purpose of calculating the diversified flow QW to the ward, the number of terminal units used in Table 10 may be taken as number of terminal units in the ward.

**4.62** A department may comprise several ward units and treatment suites. The diversified flow for each department, QD, is based on QW for the first ward unit, plus 50% of the flow for the remaining ward units.

### **Surgical air 700 kPa**

#### **Flow and pressure requirements for 700 kPa surgical air system**

**4.63** The pressure requirements of surgical tools are between 600 and 700 kPa and flows may vary between 200 and 350 l/min (STP) see Table 11. Most surgical tools are designed to operate within this pressure range. Higher pressures are likely to cause damage to tools. Inadequate tool performance, however, is likely to result from the lack of flow at the specified pressure.

**4.64** The introduction of synthetic air (from on-site blending of oxygen and nitrogen) leads to the possibility of using nitrogen as the power source for surgical tools. Synthetic air is covered in Chapter 7 "System design – medical air".

**4.65** The pipeline systems should be designed to provide a flow of 350 l/min at 700 kPa at the terminal unit. Existing systems may not meet this revised specification; in any given pipe the pressure drop at a flow of 350 l/min will be about twice the pressure drop at 250 l/min.

#### **Diversity**

**4.66** Surgical air 700 kPa is only required where surgical tools are to be used. This would typically be orthopaedic, neuro-surgery theatres and possibly plaster rooms. However, to facilitate maximum flexibility, surgical air should be provided in all theatres. The diversified flow is based on the assumption of 350 l/min for the first theatre and 25% of the remainder – see Table 12.

**4.67** Because surgical tools are used only for specific applications, it is unlikely that more than one tool is actually in use at any given time, even in a large operating department comprising several theatres.

Table 10 Medical air 400 kPa design and diversified flows

| Department                                                  | Design flow for each terminal unit l/min | Diversified flow Q l/min                     |
|-------------------------------------------------------------|------------------------------------------|----------------------------------------------|
| <b>In-patient acute</b>                                     |                                          |                                              |
| Ward units – single and multi-bedrooms<br>Treatment rooms   | 20                                       | $QW = 20 + \frac{(n-1)10}{3}$                |
| Each ward unit<br>Departments comprising several ward units | 20                                       | $QD = QW \left\{ \frac{1+(w-1)}{2} \right\}$ |
| ITU and CCU                                                 | 80                                       | $QI = nB-1 * \frac{80}{2}$                   |
| <b>Adult acute day care</b>                                 |                                          |                                              |
| Major treatment room<br>Endoscopy room                      | 40                                       | $QT = 40 + (T-1) * \frac{40}{4}$             |
| <b>Maternity department</b>                                 |                                          |                                              |
| Delivery suite                                              | 40                                       | $QM = 40 + (T-1) * \frac{40}{4}$             |
| Normal delivery room                                        | 40                                       | $QM = 40n$                                   |
| Operating suite                                             | 40                                       | $QM = 40 + (T-1) * \frac{40}{4}$             |
| Neonatal unit                                               | 40                                       | $QN = 40nB$                                  |
| <b>Dental department</b>                                    |                                          |                                              |
| Major dental/oral surgery                                   | 40                                       | $QDENT = 40nB$                               |
| <b>Operating department</b>                                 |                                          |                                              |
| Operating room                                              | 40                                       | $QT = 40 + (T-1) * \frac{40}{4}$             |
| Anaesthetic room                                            | 40                                       | $QA = 40 + (A-1) * \frac{40}{4}$             |
| Recovery                                                    | 40                                       | $QR = 40 + (nB-1) * \frac{10}{4}$            |
| Plaster room                                                | 40                                       | $QP = 40 + (nB-1) * \frac{40}{4}$            |
| <b>Accident and emergency</b>                               |                                          |                                              |
| Major treatment/<br>radiodiagnostic/special<br>procedures   | 40                                       | $QMT = 40 + (T-1) * \frac{40}{4}$            |

Table 11 Typical pressure and flow requirements for surgical tools

| Type of tool              | Pressure kPa | Flow l/min |
|---------------------------|--------------|------------|
| Small air drill           | 600–700      | 200        |
| Medullary reaming machine | 600–700      | 350        |
| Oscillating bone saw      | 600–700      | 300        |
| Universal drill           | 600–700      | 300        |
| Craniotome                | 620–750      | 300        |

## System capacity

**4.68** Unlike respirable equipment, surgical tools are used intermittently, typically for a short burst of a few seconds up to a maximum of 2/3 minutes. The manifold or plant, therefore, should have the capacity to provide the design flow of the pipeline for a maximum period of 5 minutes in any 15-minute period.

Table 12 Surgical air 700 kPa design and diversified flows

| Department            | Design flow for each terminal unit l/min | Diversified flow Q l/min        |
|-----------------------|------------------------------------------|---------------------------------|
| Operating room        | 350                                      | $QT = 350 + \frac{(T-1)350}{4}$ |
| SDU, ODA workshop etc | 350                                      | QWS = 350                       |

### Terminal units intended for equipment testing

**4.69** It may be necessary to provide surgical air at 700 kPa in the equipment service workshop for testing purposes. Unless a surgical air 700 kPa pipeline is available nearby, it may be cost-effective to use portable cylinders, with a two-stage regulator.

**4.70** If a pipeline supply is to be provided, then each terminal unit should be capable of passing 350 l/min. Where several terminal units are provided, it is unlikely that more than one terminal unit will be in use at any time, and therefore the total design flow for the equipment service workshop will be 350 l/min. Because the actual use will be low, it is unlikely that the provision of such a terminal unit for testing purposes will have a significant effect on the total design flow for the surgical air 700 kPa system.

## Vacuum

### In-patient accommodation

**4.71** Where vacuum terminal units are provided in ward areas, it is unlikely that more than one terminal unit in any room (single or multi-bed) will be in use at any time. Therefore the diversified flow QW should be calculated on the basis of 40 l/min per ward unit of 28 beds, although each terminal unit should be capable of passing 40 l/min.

**4.72** For a department comprising several ward areas and treatment rooms, the diversified flow is based on 80 l/min for the first bed and 1 l/min for the remainder. For treatment rooms, 40 l/min should be allowed for the first room and it may be assumed that no more than 25% of the remainder will be in use simultaneously – see Table 13.

**4.73** For a hospital comprising several departments, the total flow is based on 80 l/min for the first bed and 1 l/min for any remaining beds not already assigned to a specific department.

**4.74** A factor of 0.75 should be applied to the calculated total flow to avoid unrealistically high flows.

### Operating departments

**4.75** Vacuum is provided for the surgical team and anaesthetist; it is also provided in the anaesthetic room and recovery.

**4.76** Two terminal units are provided in each operating room. Since it is possible for both terminal units in the operating room to be in use simultaneously, each operating room will require 80 l/min and each terminal unit should be capable of passing 40 l/min – see Table 13.

**4.77** For anaesthetic rooms, it may be assumed that 40 l/min will be required at each terminal unit.

**4.78** Where there are several operating suites, each comprising one operating room and one anaesthetic room, the diversity may be calculated on the basis that for the first two suites no diversity should be allowed, that is, 240 l/min.

**4.79** For more than two theatres, it may be assumed that 50% of remainder will be in use simultaneously at 120 l/min per suite.

**4.80** Maternity, accident and emergency theatres, and major treatment rooms should all be treated as operating rooms.

**4.81** Each terminal unit in recovery should be capable of passing 40 l/min. The diversity of flow is calculated on the basis that vacuum is being used simultaneously at 25% of bed spaces (minimum one).

Table 13 Vacuum design and diversified flow

| Department                             | Design flow for each terminal unit l/min | Diversified flow Q l/min                           |
|----------------------------------------|------------------------------------------|----------------------------------------------------|
| <b>In-patient acute</b>                |                                          |                                                    |
| Ward units – single and multi-bedrooms | 40                                       | QW = 40                                            |
| Treatment rooms                        | 40                                       | OT = $40 + (nB-1) \times \frac{40}{4}$             |
| Departments – ward areas               | 40                                       | QD = $80 + (nB-1) \times 1$                        |
| <b>Operating department</b>            |                                          |                                                    |
| Operating room                         | 40                                       | QT = 80                                            |
| Anaesthetic room                       | 40                                       | QA = 40                                            |
| Operating suite                        |                                          |                                                    |
| 1 operating room                       | 40                                       | QS = $(120 \times 2) + \frac{(S-2) \times 120}{2}$ |
| Recovery room                          | 40                                       | QR = $40 + (nB-1) \times \frac{40}{4}$             |
| ITU and CCU                            | 40                                       | QI = $40 + (nB-1) \times \frac{40}{4}$             |

**Intensive therapy unit, coronary care unit and neonatal unit**

**4.82** Each terminal unit should be capable of passing 40 l/min, but it may be assumed that only 25% of bed spaces will require vacuum simultaneously (minimum one).

**4.83** All other high-dependency areas should be treated as ITU/CCU.

## 5.0 System design – general

### Cylinder manifold installation

#### General

**5.1** Manifolds should be connected to the pipeline via a control panel which provides two equal banks of gas cylinders. The changeover from the “duty” to the “standby” bank of cylinders should be automatic. All manifolds should be capable of passing the full pipeline flow. The temperature of the gas may fall as low as  $-30^{\circ}\text{C}$  as the gas passes through the regulator at maximum capacity, and the equipment should be designed accordingly.

**5.2** A schematic layout for a typical installation is given in Figure 1. Total storage is usually provided on the basis of one week’s supply; each bank of the manifold should hold not less than two days’ supply and a supply for three days should be held in cylinders in the store.

**5.3** The nominal and usable capacity of the cylinders commonly used on manifolds are given in Table 14 (the figures are the equivalents at standard temperature and pressure).

Table 14 Capacities of medical gas cylinders used on manifolds

| Gas                                                           | Nominal capacity (litres)<br>at 137 bar g | ** Usable capacity<br>(litres) |
|---------------------------------------------------------------|-------------------------------------------|--------------------------------|
| Oxygen J size                                                 | 6,800                                     | 6,540                          |
| Nitrous oxide J size                                          | 18,000                                    |                                |
| G size                                                        | 9,000                                     | 8,900                          |
| Nitrous oxide/oxygen<br>mixtures G size                       | 5,000                                     | 4,740                          |
| Medical air J size                                            | 6,400                                     | 6,220<br>5,550                 |
| Oxygen/carbon dioxide<br>mixture (5% CO <sub>2</sub> ) J size | 6,800                                     | 6,540                          |
| Nitric oxide AU size                                          | 1,500*                                    | –                              |
| Nitric oxide AK size                                          | 4,000*                                    | –                              |

\* This may be subject to change.

\*\* The usable figures are for discharges down to a gauge pressure of 7 bar g. Two sets of figures are provided for air – for 400 kPa systems and 700 kPa systems – the latter is for discharge down to 15 bar g.

**5.4** An automatic manifold changeover from “duty” to standby should occur at a cylinder pressure which will ensure the greatest possible utilisation of the contents of the cylinders in the “duty” bank. If the normal operation of the changeover control depends on an electricity supply, the design should be such that failure of the electricity supply does not disrupt the flow of gas to the distribution system.

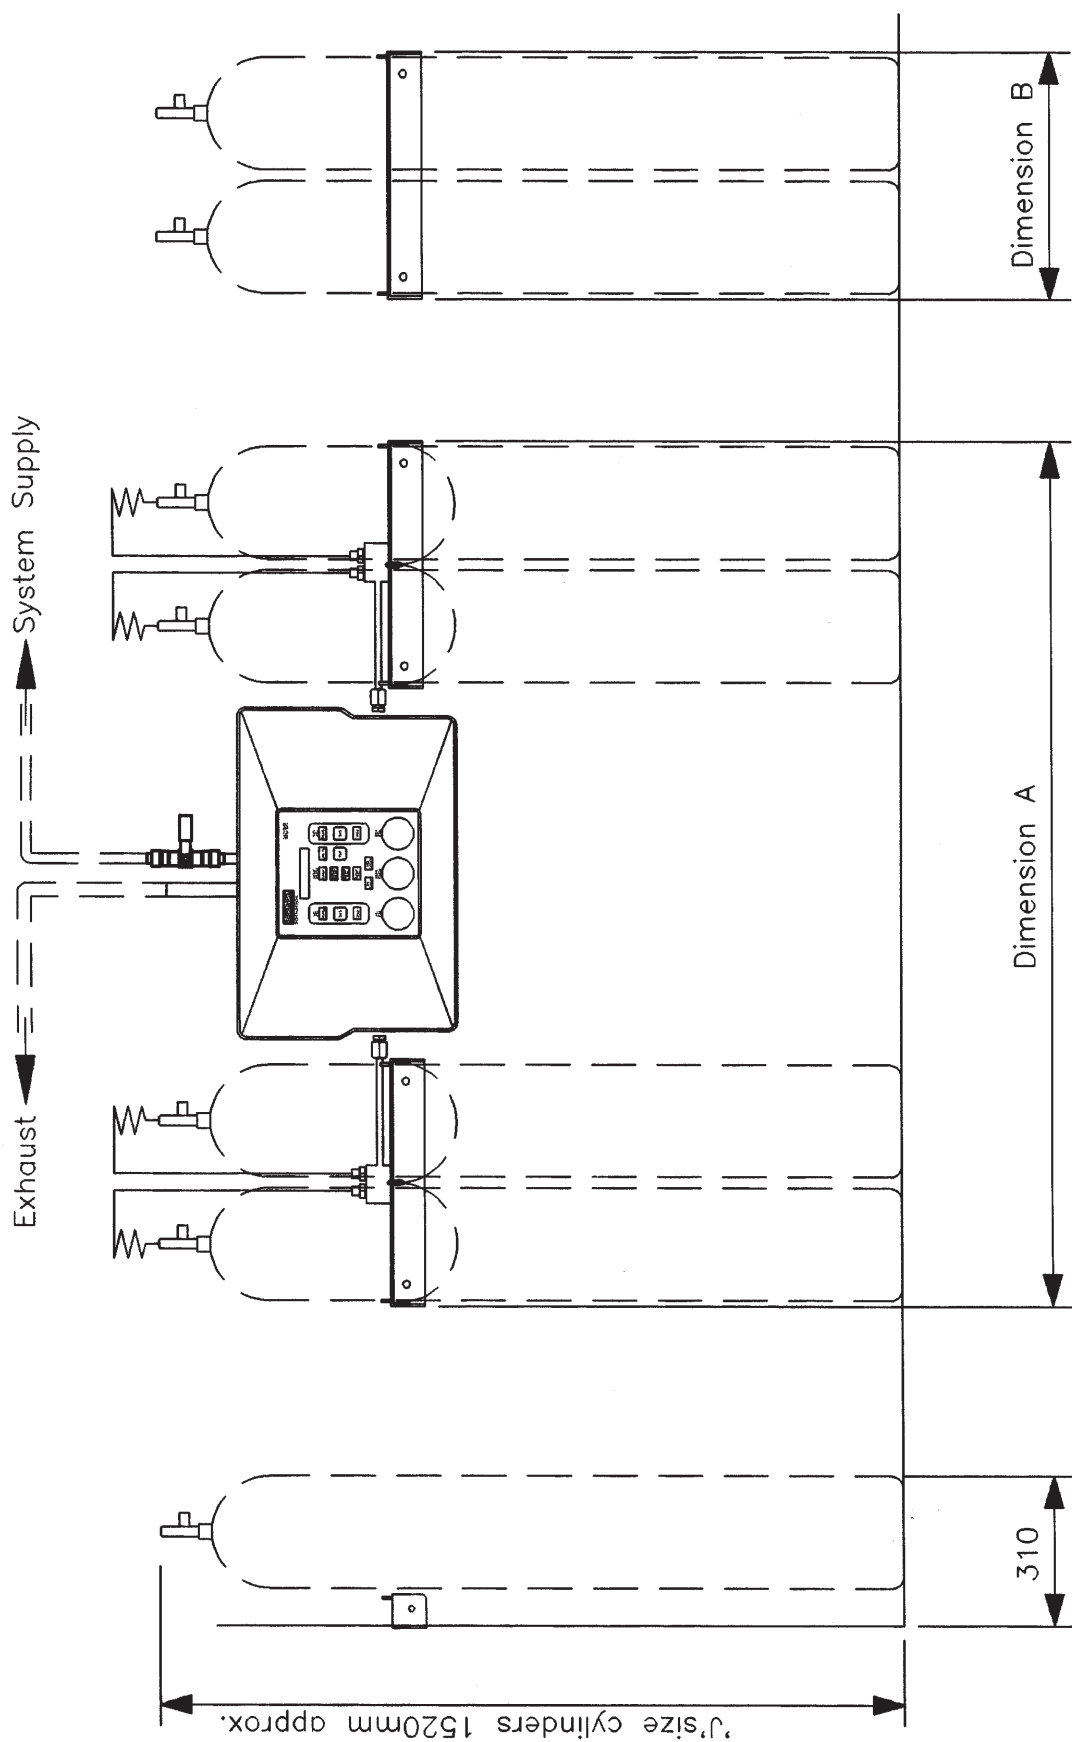

Figure 1 Schematic layout of cylinder manifold (400 kPa) system (reproduced by kind permission of MEDÆS)



*Some manifolds default to a specific bank following a power failure, regardless of which bank was the running bank prior to interruption of the supply.*

**5.5** Manifolds and control panels should be designed and certificated for use with 230 bar g cylinders. The manifold headers should incorporate a renewable non-return valve to allow removal and replacement of any cylinder and to prevent the discharge of a bank of cylinders in the event of “tail-pipe” rupture. The “tail-pipe” manifold connector should be gas-specific.

**5.6** In the event of power failure, on restoration of the power supply, the original running bank should be on-line, that is, the same bank as was the running bank prior to interruption of the supply.

**5.7** The tail-pipe cylinder connector must be a pin-index yoke connector in accordance with BS 1319 for oxygen, nitrous oxide/oxygen mixture (50% v/v) and medical air. The connector for nitrous oxide should be a side outlet valve connector in accordance with BS 341 PE1. The manifold connectors should be in accordance with the following:

|         |                                    |
|---------|------------------------------------|
| M26 x 2 | O <sub>2</sub> /CO <sub>2</sub>    |
| M24 x 2 | Air                                |
| M22 x 2 | N <sub>2</sub> O/O <sub>2</sub>    |
| M20 x 2 | O <sub>2</sub>                     |
| M18 x 2 | N <sub>2</sub> O                   |
| M16 x 2 | NO                                 |
| M14 x 2 | N <sub>2</sub> oxygen free (purge) |

**5.8** Pressure indication should be provided to indicate pressure in each cylinder bank and in the MGPS.

#### **Pressure control**

**5.9** The pressure control should maintain the nominal pipeline pressure within the limits given in Appendix K.

**5.10** There should be separate pressure regulating valves for each cylinder bank and the control system should be designed so that the cylinders of one bank can be changed, or the pressure regulator for one bank can be overhauled, without loss of continuity of the gas supply.

**5.11** Pressure safety valves should be of the self-closing type and be installed on each distribution pipeline downstream of the manifold line pressure regulator and the main isolation valve. A pressure safety valve should also be installed between the emergency/reserve manifold and the pipeline distribution system. It should have a flow capacity at least equal to that of the pressure regulator immediately upstream of it. The discharge pipe should be at least one size larger than the main pipeline.

**5.12** This discharge pipe line should be vented to atmosphere, outside the building, in an area where the discharge of oxygen, nitrous oxide, nitrous oxide/oxygen mixture, oxygen/carbon dioxide mixture, and nitric oxide or nitrogen will not contribute to a fire risk, or cause injury to personnel.

**5.13** It should be well clear of any openable window or air intake. The ends of the discharge pipelines should be turned downwards to prevent the ingress of dirt and moisture, and be placed and protected so that frost cannot form or be collected upon them. Similar safety valve arrangements are required for installations supplied from liquid oxygen cylinder installations.

### Manifold monitoring and indicating system

5.14 The monitoring and indicating system should perform the following functions:

- a. overall manifold monitoring;
- b. manifold condition indication;
- c. overall supply plant indication.

All functions should be appropriately identified. Indicators should have a design life of at least one year. The system should be capable of automatic reinstatement after restoration of the power supply.

5.15 Manifold monitoring, indicating and alarm systems should be on the essential electrical supply.

### Manifold control unit

5.16 The control unit should include a green "mains supply on" indicator.

### Manifold monitoring

5.17 Each automatic manifold should be provided with monitoring to detect:

- a. duty bank operating;
- b. duty bank empty and standby bank operating;
- c. standby bank below 10% capacity when the duty bank is empty;
- d. reserve bank below nominal 14 bar g (for nitrous oxide) and below 68 bar g pressure for other gases;
- e. pipeline pressure faults below -20% or above +20% of nominal pressure.

*The emergency/reserve manifold is monitored for condition (d)*

### Manifold indicator unit

5.18 There should be indicators to show the following conditions:

- a. for each automatic manifold:
  - (i) a green "running" indicator for each bank. This should display when the bank is supplying gas, irrespective of the pressure;
  - (ii) a yellow "empty" indicator for each bank when the running bank is empty and changeover has occurred;
  - (iii) a yellow "low pressure" indicator for each bank to be illuminated after changeover, when the pressure in the bank now running falls to the low pressure setting;
- b. for each emergency/reserve bank a yellow indicator to be illuminated when the pressure in the bank falls below 14 bar g for nitrous oxide or below 68 bar g for other gases;
- c. for the pipeline distribution system a red "low pressure" and a red "high pressure" indicator to be illuminated when the respective conditions occur.

*In practice, conditions (ii) and (iii) are the same*

## Alarm signal status unit

**5.19** The following indication of manifold conditions should be provided:

| <i>Indication</i>                            | <i>Legend</i>                       |
|----------------------------------------------|-------------------------------------|
| a. green "normal"                            | <i>normal</i>                       |
| b. yellow "duty bank empty, standby running" | <i>change cylinders</i>             |
| c. yellow "duty bank empty, standby low"     | <i>change cylinders immediately</i> |
| d. yellow "emergency/reserve banks low"      | <i>reserve low</i>                  |
| e. red "pipeline pressure fault"             | <i>pressure fault</i>               |

**5.20** Conditions (b) to (e) should be transmitted to the central alarm system. Where relays are used, they should be normally energised relays which de-energise under fault conditions, with contacts having a minimum rating of 50V dc, 50 mA.

**5.21** Alternatively, volt-free, normally closed contacts rated at 50 V dc, 50 mA should be provided for transmission of conditions (b) to (e) to the alarm system.

**5.22** The panel can be incorporated into the manifold control unit or be a separate unit within the plantroom. If mounted separately, the cabling should be monitored for open/short circuit. In the event of such a cable fault, a red "system fault" lamp should be illuminated on the alarm signal status unit, together with the appropriate alarm condition.

## Emergency reserve supply

### General

**5.23** A permanently connected reserve supply system must be provided for all MGPS including nitric oxide systems (excluding 700 kPa surgical air systems), for emergency use or to permit servicing or repair.

**5.24** The reserve supply should be designed, when practicable, to provide the same flow rate as the primary system and have sufficient connected capacity to supply the pipeline for at least 4 hours. When such provision would result in six cylinders or more on each bank, the additional cylinders should be held in the manifold rooms. A non-return valve and isolating valve should be installed immediately upstream of the reserve manifold connection to the pipeline distribution system.

**5.25** The requirements for the emergency/reserve supply capacity should be set out in the operational policy and should take into account the local supply situation for cylinders, liquid supply in the event of an emergency and the system flow that would be required. The gas supplier should be consulted.

**5.26** The specific requirements will depend on the method of primary supply. Where this results in an unrealistic number of cylinders being kept on site, the operational policy should be set out giving details of procedures to be followed in an emergency, to ensure continuity of supply.

## 5.0 System design – general

**5.27** For large installations, it may be impractical to rely on a cylinder manifold system and consideration should be given to either a bulk liquid or liquid cylinder emergency/reserve supply.

**5.28** The operational policy should set out the action to be taken in the event of loss of the primary source of supply.

**5.29** In the event of loss or failure of the primary source of supply, the emergency/reserve system should be able to provide (at least for a short time) the total system flow, since it will not always be possible to advise users immediately of an emergency situation.

**5.30** The operational policy should provide details of further action to be taken, location of emergency manifolds, cylinders etc.

### **Emergency reserve supplies for manifold installations**

**5.31** The supply should be brought into operation automatically via a non-return valve.

**5.32** A two-cylinder emergency reserve supply would normally be considered adequate for a cylinder manifold supply system. The cylinder valve of one should be permanently open so that gas is immediately available. The cylinder valve of the second cylinder should be closed so that by alternative use a continuous supply can be maintained. A typical system is shown in Figure 2.

### **Emergency reserve supply for air compressors/liquid oxygen/oxygen concentrators (PSA)**

**5.33** The supply should normally comprise a two-bank manifold system. A typical number of cylinders in each bank would be five or six depending on size and location. See also the Chapter on bulk liquid oxygen supply systems for more details of the back-up and emergency supply facility.

### **Location**

**5.34** The emergency/reserve manifold for the cylinder system should be located in the manifold rooms of the primary supply. Reserve manifold rooms for other systems should similarly be installed in an appropriate manifold room.

### **Design**

**5.35** Except as stated herein, emergency/reserve manifold systems should conform to the requirement for manifold supply systems in general.

**5.36** The emergency/reserve supply to the cylinder manifold should come into operation automatically, in accordance with the requirements for manifold supply systems for 400 kPa systems given in Chapter 5.

**5.37** Provision should also be made for an emergency/reserve inlet supply for either a replacement or alternative supply.

**5.38** Emergency/reserve supplies for liquid oxygen systems are covered in the “Bulk liquid oxygen systems” section of Chapter 6. It may be advisable to locate the emergency/reserve supply, or the emergency supply facility, where provided, in a location remote from the primary source of supply.

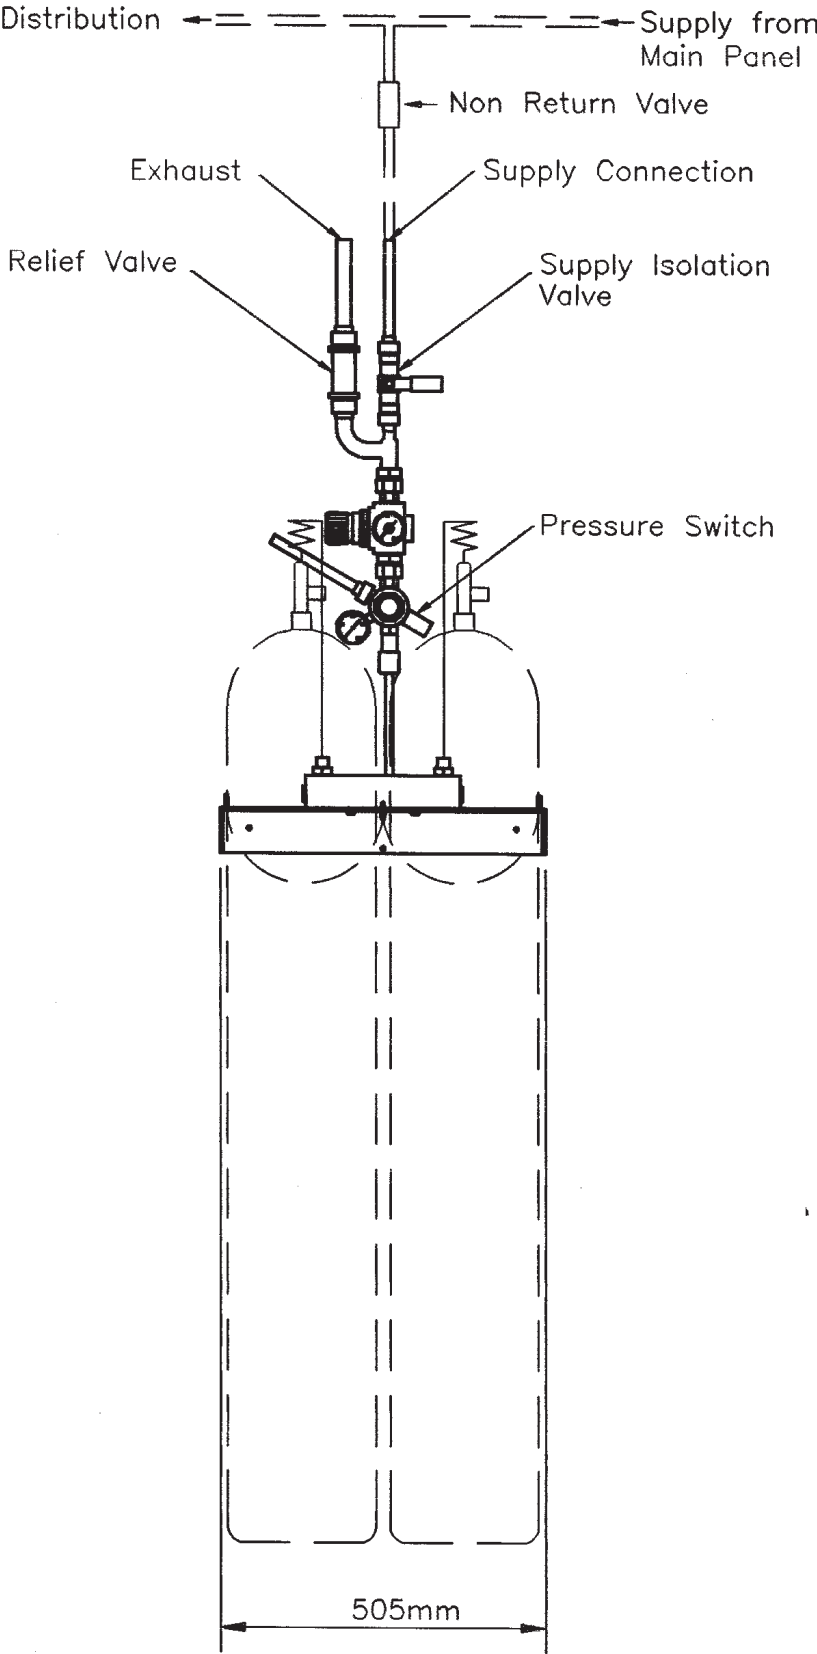

Figure 2 Emergency supply manifold (reproduced by kind permission of MEDÆS)

## 6.0 System design – oxygen supplies

### Bulk liquid oxygen systems and vacuum insulated evaporator (VIE)

#### General

**6.1** A VIE can be used for the storage of any cryogenic liquid which can include, in healthcare premises, oxygen, nitrogen and nitrous oxide. The VIE is a cryogenic pressure vessel made of stainless steel supported within an outer vessel, similar to a vacuum flask. The VIE plant has advantages over other oxygen supply systems where high demands exist, and is used whenever it can be shown to be more economical, provided that a suitable location is available. Bulk liquid oxygen installations show significant manual handling savings over conventional cylinder manifolds. This part of the system usually remains the property and responsibility of the gas supplier, who retains full legal responsibility for compliance with the maintenance requirements and the Pressure Systems and Transportable Gas Containers Regulations 1989.

**6.2** The hospital should be made aware of the general operating principles by the medical gases contractors and will need to include the VIE system in the hospital alarm system.

**6.3** Consideration should be given to the legal and operational management consequences of using a different supplier of oxygen on the same pipeline system. Any contracts involving different suppliers should clearly state the obligations and limitations of liabilities.

**6.4** The consumption of oxygen is increasing steadily, and in order to ensure continuity of supply it is essential that the VIE is correctly sized for the demand, and that a telemetry system is installed.

#### System sizing

**6.5** The liquid oxygen vessel is normally selected to provide for at least 14 days' consumption. An emergency back-up supply equivalent to 24 hours' average use should be available on site. This may be provided by bulk liquid, liquid cylinders or compressed gas cylinders, as appropriate for each site.

**6.6** A maximum of 20 cylinders are normally connected to the emergency manifold – ten on each bank. Where it would be impractical to hold 24 hours' supply in cylinders on site (for example, in a large teaching hospital), consideration should be given to the ease of supply in an emergency, for example proximity to gas supplies depots, telemetry systems, etc, to see whether it would be possible to reduce the number of cylinders on site. It is essential that any relaxation of the number of cylinders held should be validated and documented with the gas supplier, clearly stating responsibilities and expectations for supply of cylinders.

**6.7** Where additional outlet points are installed on a pipeline system fed from a VIE, the hospital should notify the gas supplier to ensure that changes in consumption do not jeopardise the security of stock.

**6.8** With the use of telemetry systems, it is possible to monitor gas usage and thus optimise the delivery frequency whilst maintaining adequate stocks. The gas supplier should advise on the most appropriate vessel size for a particular site, geographic location, and the standby requirements, taking into account the demand, peak consumption and site location.

#### **Equipment description**

**6.9** The system is designed to provide:

- a. a liquid oxygen VIE at a pressure of at least 10.5 bar g;
- b. standby oxygen facility with a capacity of at least 24 hours' usable supply to protect against VIE supply failure;
- c. stand-alone emergency supply facility, where appropriate, to protect against failure from the VIE to the hospital.

#### **Standby oxygen facility**

**6.10** This may be provided by:

- a. standby liquid oxygen VIE;
- b. manifold liquid cylinders;
- c. manifold compressed gas cylinders.

#### **System layout**

**6.11** The various systems are:

Figure 3 VIE with cylinder back-up;

Figure 4 VIE with VIE standby;

Figure 5 VIE with liquid cylinder standby.

#### **VIE**

**6.12** A VIE installation comprises:

- a. a vacuum insulated tank to store the bulk liquid at the appropriate operating pressure;
- b. a pressure raising system to maintain the VIE operating pressure;
- c. a vaporiser system to convert the liquid into gaseous product at ambient temperature.

**6.13** The control panel and instrumentation for the VIE are normally mounted centrally at the front of the vessel. Pressure vessel details are given on a plate mounted on the outer vessel. The vessel must be clearly labelled with the product name.

**6.14** A separate ambient vaporiser system converts the liquid into gas at the required working pressure of 10.5 bar g.

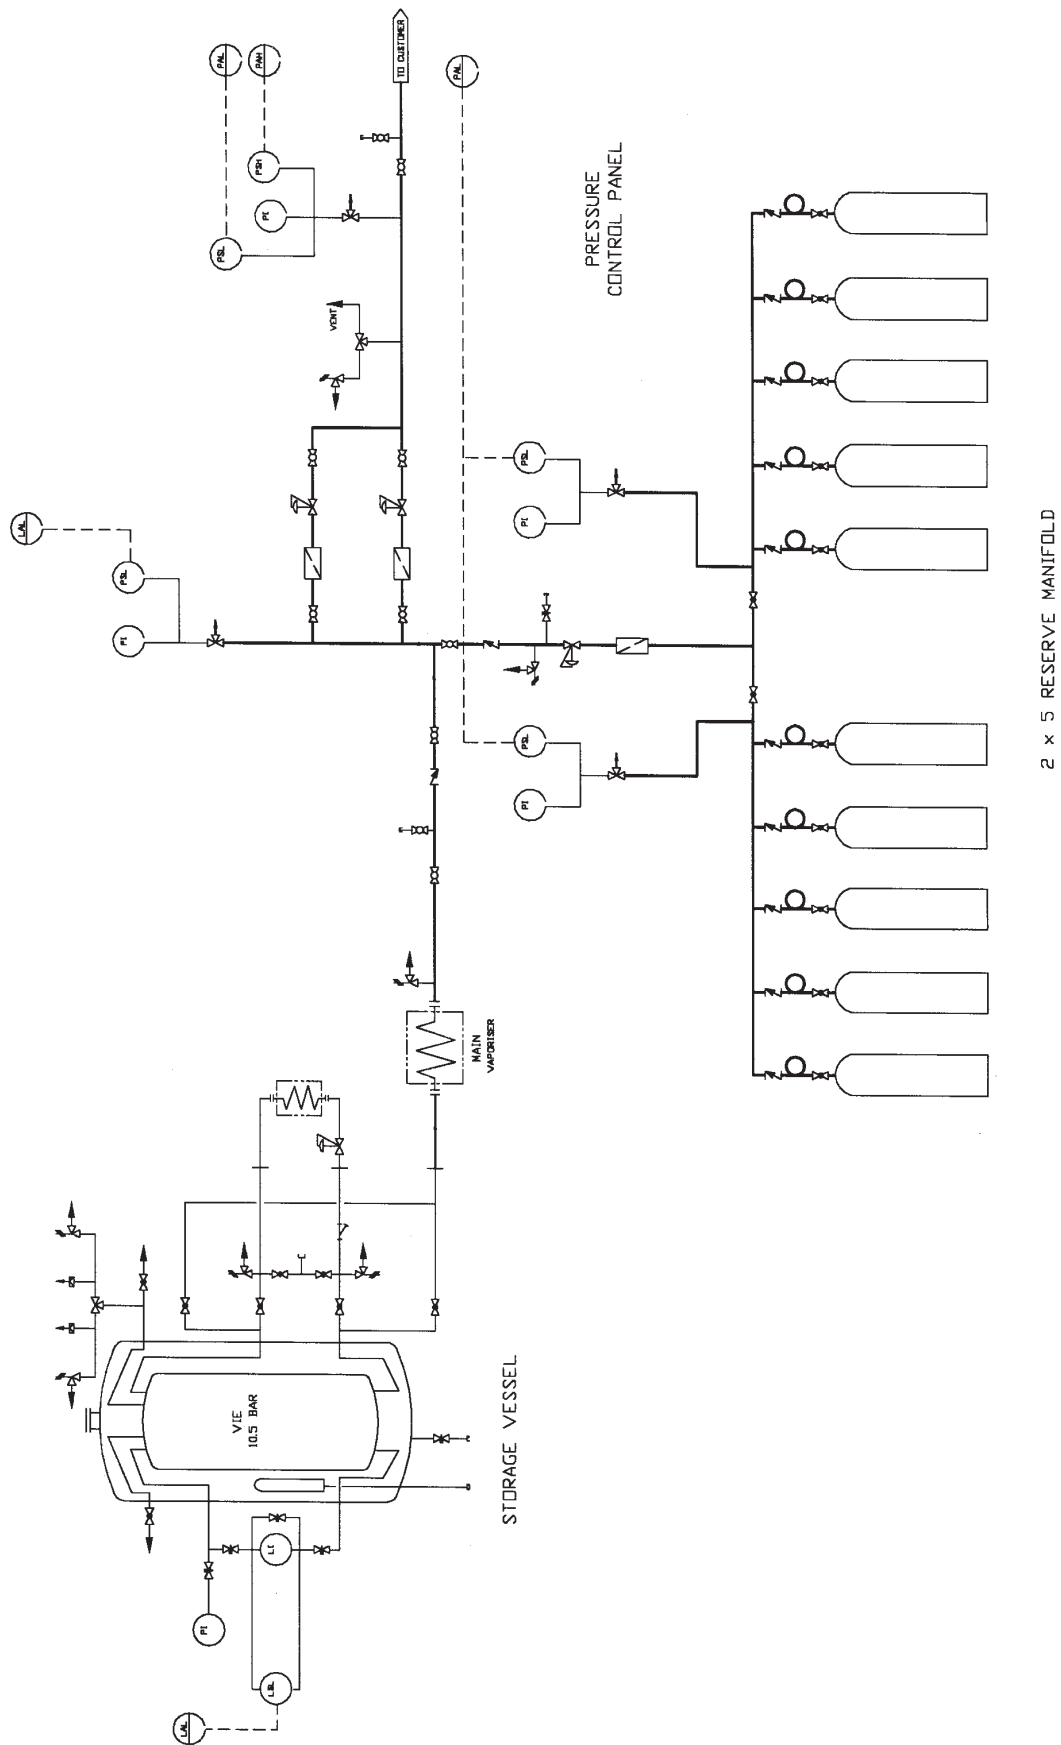

Figure 3 Typical VIE layout and pipework configuration with cylinder backup (reproduced by kind permission of BOC)



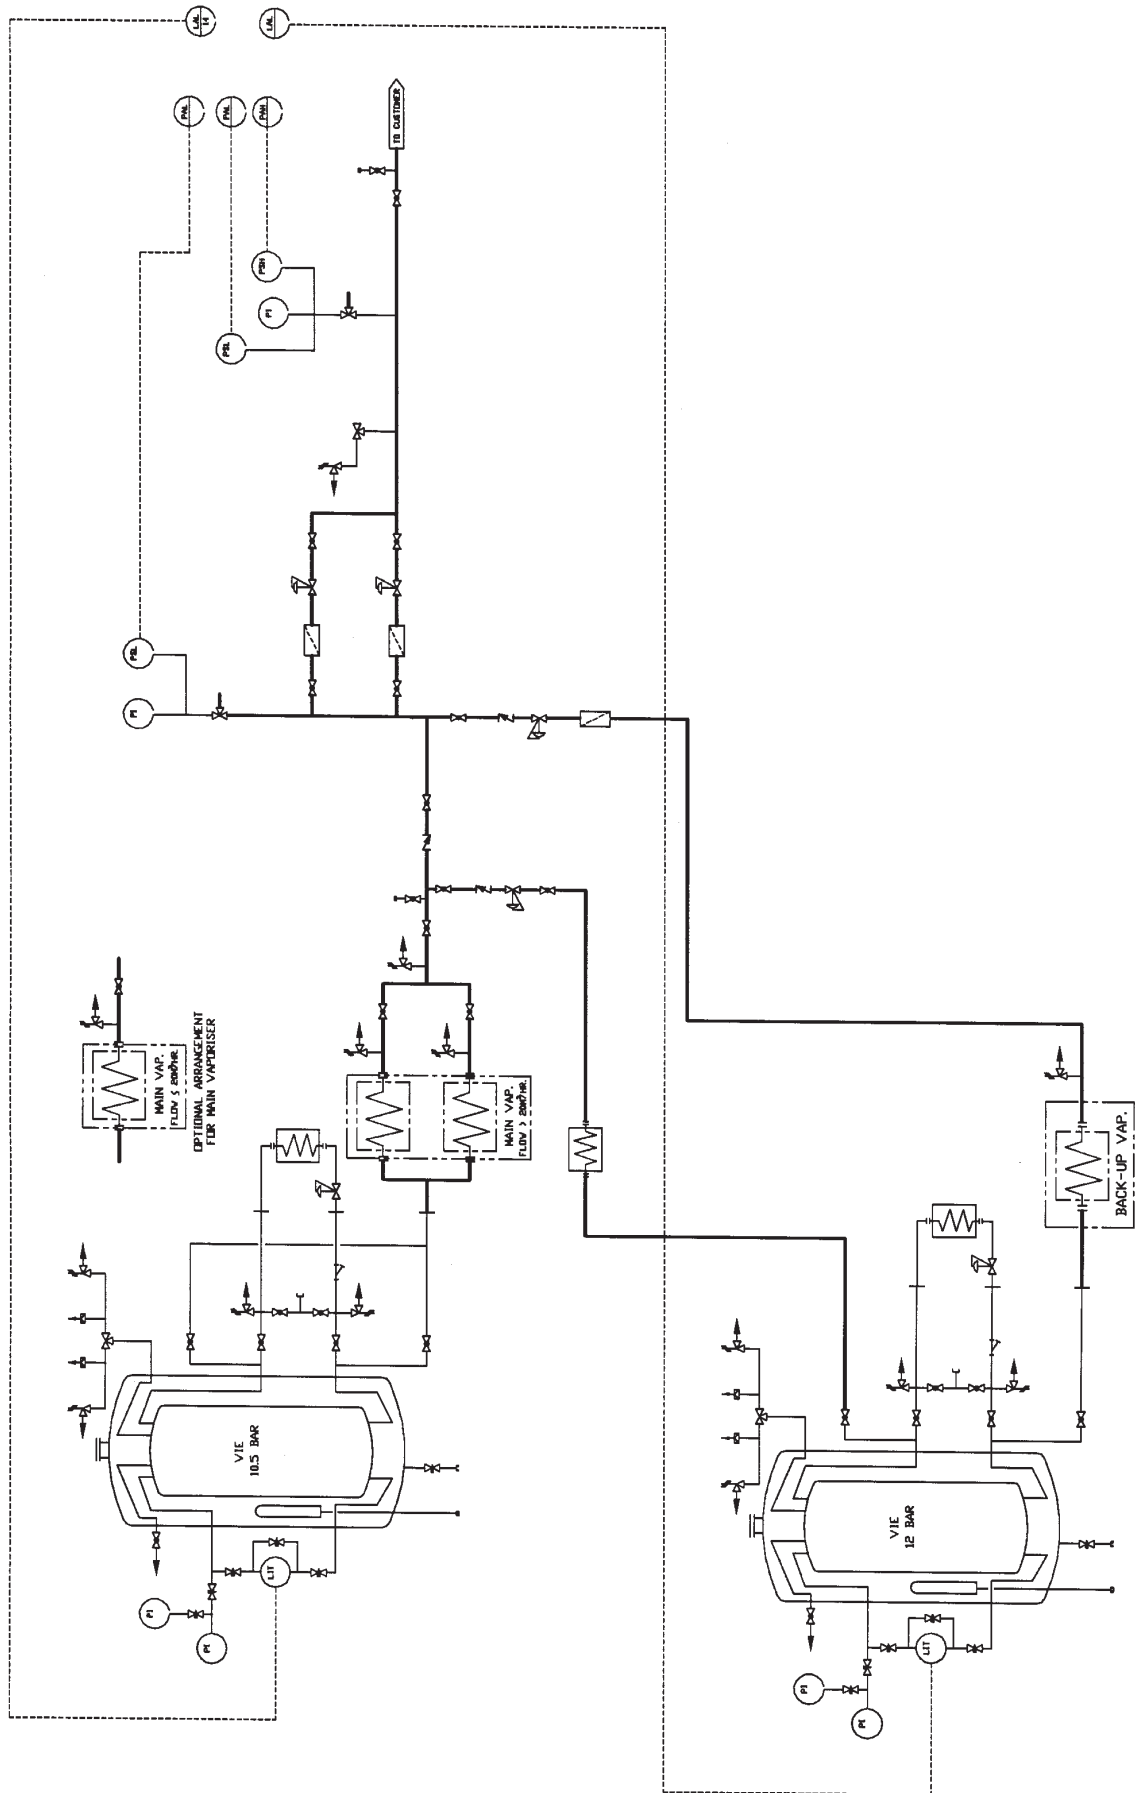

Figure 4 Typical VIE layout and pipework configuration with VIE standby (reproduced by kind permission of BOC)

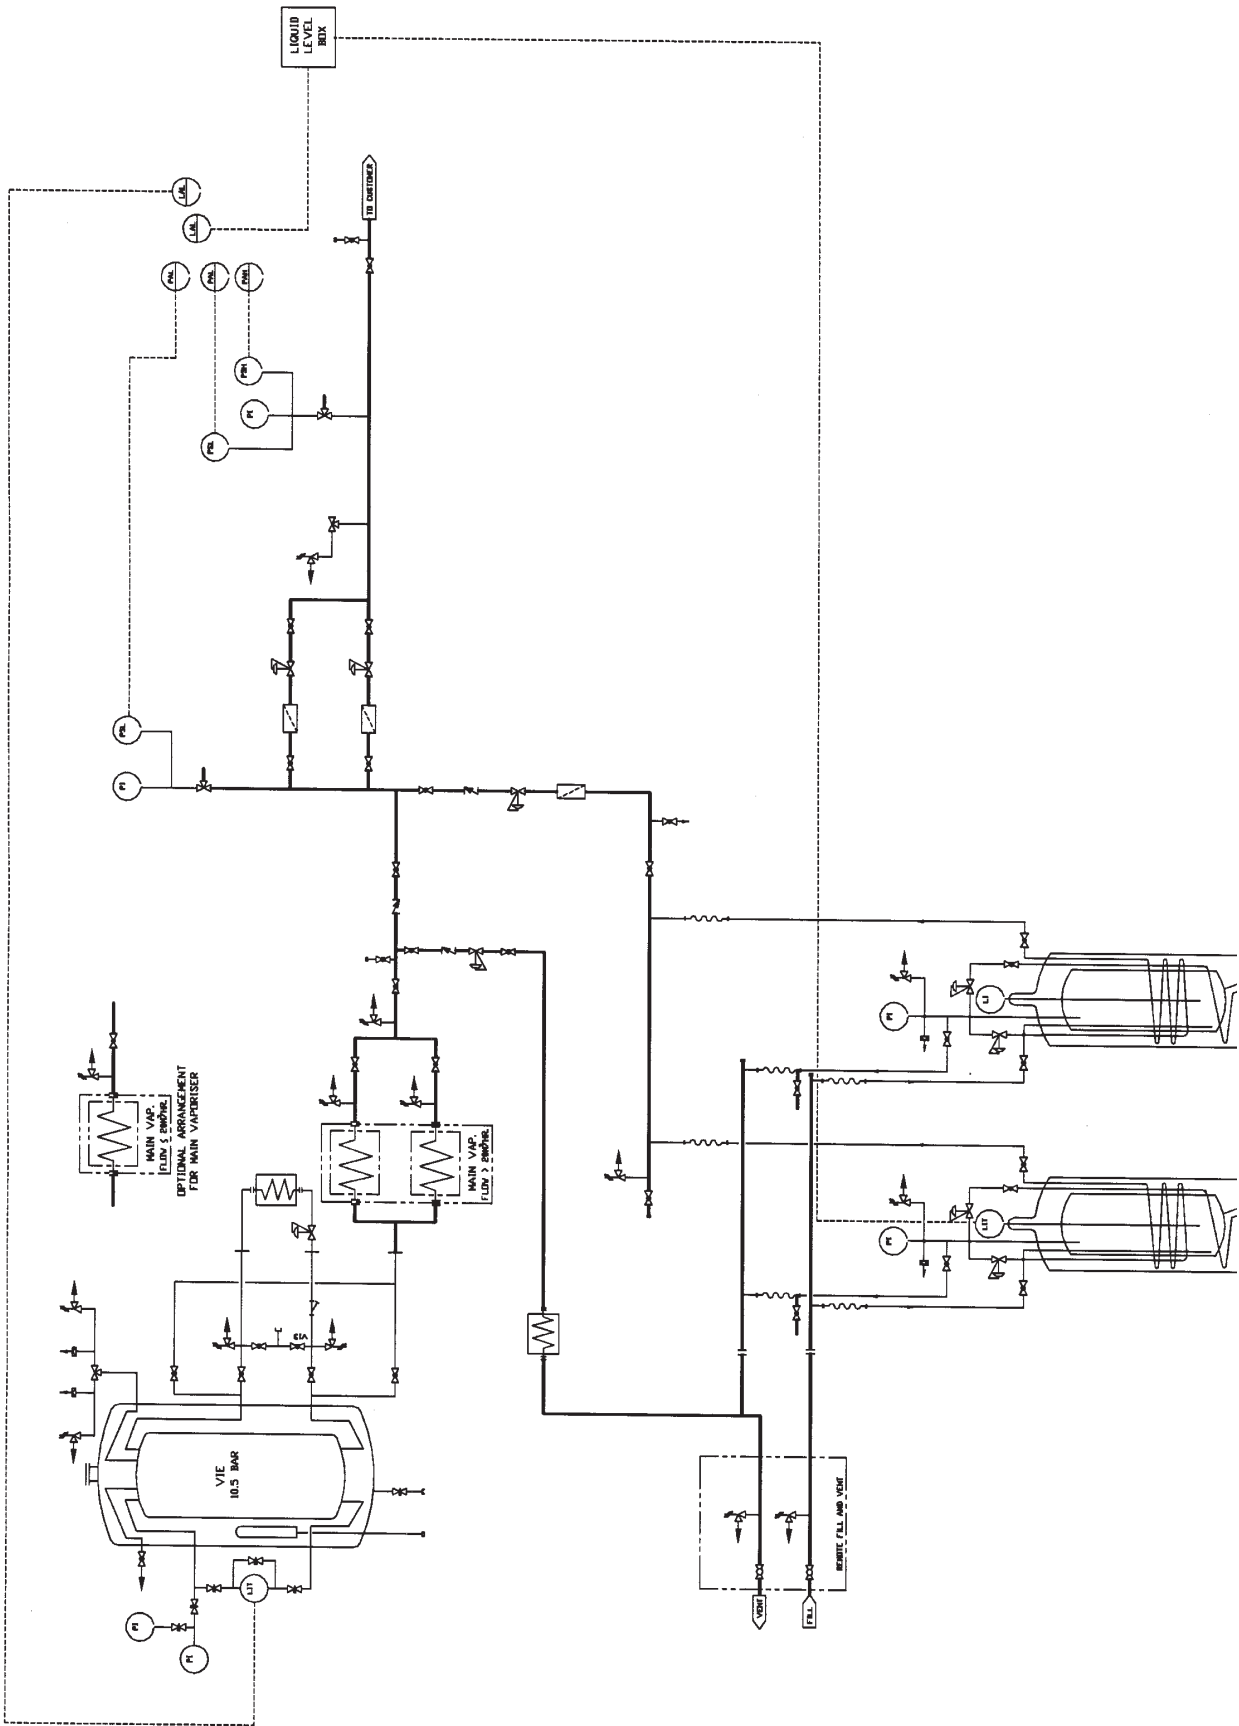

Figure 5 Typical VIE layout and pipework configuration with liquid cylinder standby (reproduced by kind permission of BOC)

### Control piping and instrumentation

**6.15** The VIE pipework configuration will depend on the standby system. The VIEs have top and bottom fill connections with a liquid outlet supply to the vaporiser and a top gas economiser connection.

*The valve information applies to BOC VIEs only. If other manufacturers' installations are in use, the operating procedures should be ascertained by the authorised person (MGPS) for the site.*

**6.16 IT IS NOT RECOMMENDED THAT ANY OF THE VALVES ARE OPENED OR CLOSED EXCEPT BY THE GAS SUPPLIER'S PERSONNEL OR EXCEPT IN AN EMERGENCY BY AUTHORISED PERSONNEL.**

### Pressure raising system

**6.17** The pressure of the VIE is automatically controlled by a pressure raising regulator which controls the flow of liquid to the pressure raising vaporiser as required. The vaporised liquid maintains the VIE gas space pressure at a minimum of 10.5 bar g.

**6.18** Where several vaporisers are installed, there should be automatic control of changeover to prevent excessive icing of an individual vaporiser.

### Direct reading contents gauge and telemetry systems

**6.19** The contents gauge of the VIE is of the differential pressure type, indicating the liquid content. Calibration curves required for use with differential pressure gauges should be provided by the gas supplier.

**6.20** A telemetry system should be installed which continuously monitors and records the tank contents and tank pressure. This information can be used to identify liquid levels and consumption rates, and can indicate the VIE operating condition to assist maintenance requirements.

**6.21** This data will be transmitted to both the hospital and the gas supplier as required.

**6.22** Telemetry systems data can be used to predict the consumption rates and future demands.

**6.23 Safety note** – VIEs are strictly designed and manufactured to recognised national/international codes. Associated equipment is designed to the appropriate standards and authorised by design authorities.

**6.24** There must be no modification to the design of any part of the VIE system without written authorisation from the gas supplier.

**6.25** Records should be kept of design, installation, maintenance and of any modifications which are carried out by the hospital and the gas supplier.

### Control panel

**6.26** The VIE medical control panel is designed to accept a supply of gaseous oxygen from the VIE (at 10.5 bar g) or from the standby manifold (at 8.5 bar g) and to reduce the pressure to 4.2 bar g in the oxygen pipeline distribution system.

**Sites for liquid oxygen storage**

**6.27** The VIE should be located inside a fenced compound, which may also house the control panel and the standby manifold. The location should be acceptable to both the gas supplier and the hospital, and should be exclusively reserved for the storage of liquid oxygen and other non-flammable cryogenic liquids. The vessel should not be located inside a building. It may be necessary to comply with local authority planning constraints in some areas. The site chosen should comply with the safety distances in the British Compressed Gases Association Code of Practice 19 – ‘Bulk Liquid Oxygen Storage at Users’ Premises’.

**6.28** Space should be provided to facilitate any manoeuvring of the delivery vehicle. Typical turning circle dimensions are as follows:

|                     | Coupled length m | Width m | Turning circle m |
|---------------------|------------------|---------|------------------|
| Articulated vehicle | 16.5             | 2.5     | 27.5             |
| Rigid vehicle       | 8.6              | 2.5     | 20.0             |

**6.29** The safety distances shown in Figures 6 and 7 are taken from the BCGA Code of Practice. The vessel should be at least 8 m from roads, drains, buildings etc. The plinth should be concrete and should have free access at all times and be designated a “no parking” area. It should be free from rubbish, empty cylinders, and not used as a general storage area. The VIE compound is not a cylinder store. It is also important that it is served by a good road, wide enough and with turning facilities for road tankers. The road must be kept unobstructed at all times.

**Operation**

**6.30** During normal operation of the system, the valves should be in the positions indicated below:

| Valve ref/description | Normal operation | To reduce normal pressure |
|-----------------------|------------------|---------------------------|
| Gas withdrawal        | Closed           | Open                      |
| Liquid withdrawal     | Open             | Closed                    |
| Gas isolating         | Open             | Open                      |
| Liquid isolating      | Open             | Closed                    |
| Top fill              | Closed           | Closed                    |
| Bottom fill           | Closed           | Closed                    |

**6.31** Oxygen is supplied to the control panel at a pressure of 10.5 bar g where its pressure is reduced to 4.2 bar g before it flows to the pipeline distribution system. The control panel comes supplied with the following alarm conditions:

**Standby system in use**

**6.32** Should the oxygen supply from the main VIE fail, the standby system will automatically supply oxygen and simultaneously a “standby in use” alarm will be given.

**SAFETY DISTANCES FOR LIQUID OXYGEN STORAGE TABLES 1, 2 & 3  
TO BE READ IN CONJUNCTION WITH TECH. DATA SHEETS G4310 AND G4311**

| Size of Storage                     |                                                                                                 |                                                            | Separation Distance<br>Metres |
|-------------------------------------|-------------------------------------------------------------------------------------------------|------------------------------------------------------------|-------------------------------|
| Liquid Oxygen<br>Vessel<br>(Tonnes) | LPG Vessels                                                                                     |                                                            |                               |
|                                     | Weight<br>Capacity<br>(Tonnes)                                                                  | Equivalent<br>Liquid<br>Capacity<br>(m <sup>3</sup> ) 15°C |                               |
| Up to<br>200                        | 0 - 1.1                                                                                         | 0 - 2.2                                                    | 6.0                           |
|                                     | 1.1 - 4.0                                                                                       | 2.2 - 7.8                                                  | 7.5                           |
|                                     | 4.0 - 60.0                                                                                      | 7.8 - 117.0                                                | 15.0                          |
|                                     | 60.0 - 150.0                                                                                    | 117.0 - 124.0                                              | 22.5                          |
|                                     | 150.0 & above                                                                                   | 294.0 & above                                              | 30.0                          |
|                                     | LPG cylinders and other<br>liquefied flammable gas *<br>cylinders above 50 kg total<br>capacity |                                                            | 7.5                           |

**TABLE 1: SEPARATION DISTANCES: LIQUEFIED FLAMMABLE GASES, FLAMMABLE LIQUIDS AND OXYGEN STORAGE**

- a) LPG Storage  
b) Other Bulk Flammable Liquids and Liquefiable Flammable Gases

The separation distances listed above for LPG should apply to the same stored volumes (m<sup>3</sup>) of other bulk liquefied flammable gases and may be used for the same stored volumes (m<sup>3</sup>) of bulk flammable liquids (+). These distances may be reduced depending on the nature of the flammable liquid and any protective measure and in these cases an individual assessment of the proposed location shall be carried out.

- \* Common examples of liquefied flammable gases supplied in cylinders include:- ammonia, hydrogen sulphide and ethylene oxide.  
+ Common examples of bulk flammable liquids include:- acetone, methanol, diesel, petrol.

| Compressed Flammable Gas<br>Cylinders (m <sup>3</sup> )<br>(Gas volume measured<br>as Nm <sup>3</sup> at 1013 mbar and<br>15°C) | Liquid Oxygen Storage<br>Up to 200 tonnes<br>Separation Distance<br>(Metres) |
|---------------------------------------------------------------------------------------------------------------------------------|------------------------------------------------------------------------------|
| Up to 70                                                                                                                        | 5.0                                                                          |
| Above 70                                                                                                                        | 8.0                                                                          |

**TABLE 2: SEPARATION DISTANCES: COMPRESSED FLAMMABLE GASES AND OXYGEN STORAGE**

Notes:-

- For liquefied flammable gas cylinders, see table 1.
- Distances in Table 2 are based on hydrogen cylinders. Reference: BCGA CP 8 (1986).  
For separation distance for acetylene, BCGA CP 6 (1986) (23) should be referred to.

| Flammable Liquid or Gas<br>Line Size (Nominal) |            |                | Liquid Oxygen Storage up to<br>200 Tonnes Separation Distance<br>(Metres) |
|------------------------------------------------|------------|----------------|---------------------------------------------------------------------------|
|                                                | mm<br>Bore | inches<br>Bore | metres                                                                    |
| Up to                                          | 25         | 1              | 6.0                                                                       |
| Up to                                          | 50         | 2              | 10.0                                                                      |
| Above                                          | 50         | 2              | 15.0                                                                      |

**TABLE 3: SEPARATION DISTANCES: FLAMMABLE LIQUID OR GAS LINES WITH UNION FLANGES ETC AND OXYGEN STORAGE**

Notes:-

- The above separation distances are intended to provide protection for the LOX storage tank against jet flame impingement from an ignited release from the flammable liquid/gas line.
- The distances are based on LPG as the contents of the flammable liquid/gas line and are given as a 'worst case'.
- For flammable liquids or gases other than LPG in the line, the above distances should be used, unless it can be shown that smaller distances are adequate to avoid jet flame impingement.
- If some means of protection from jet flame impingement (such as shielding of the joint by fire resistive material) can be provided between the union/flange on the flammable liquid/gas line and the LOX storage and this can be shown to provide an equal or greater degree of protection than the separation distances shown, the separation distances may be reduced.

Figure 6 Safety distances for cryogenic storage vessels (reproduced by kind permission of BOC and BCGA)

## SAFETY DISTANCES FOR LIQUID OXYGEN STORAGE UP TO 20 TONNES NET LIQUID CAPACITY (DISTANCES IN METRES)

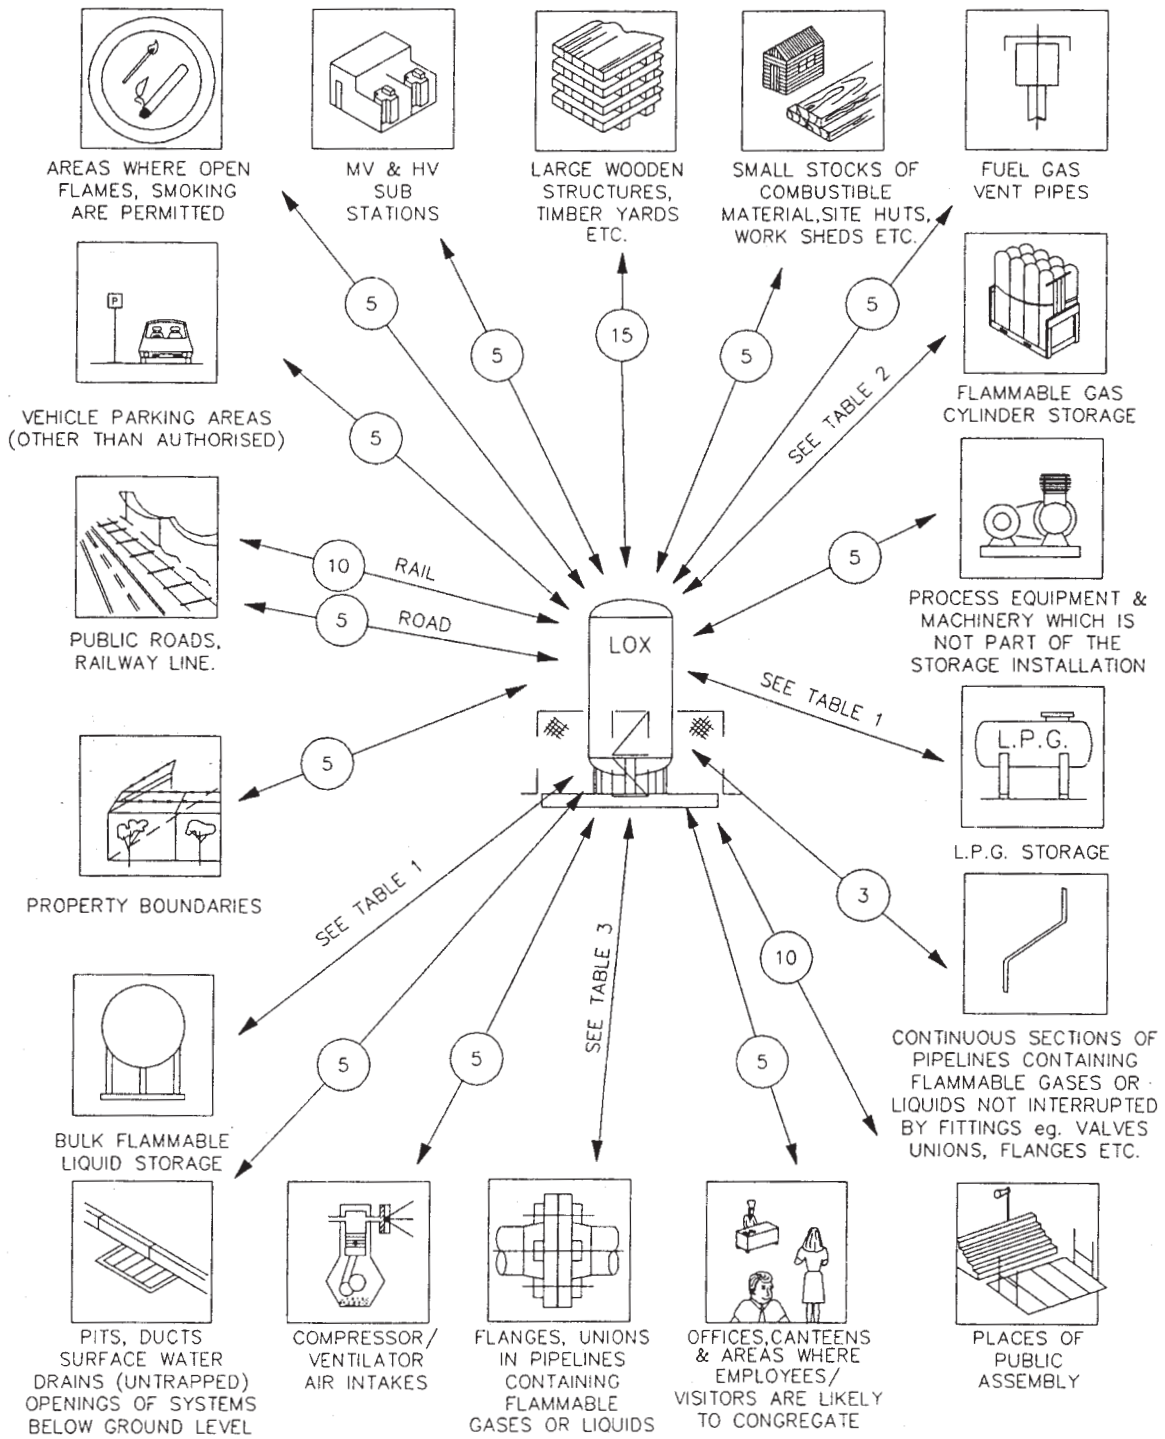

- NOTE: (1) The safety distances are measured from the exposure to
- any point on the storage system where in normal operation oxygen leakage or spillage can occur or
  - the tank outer jacket.
  - or the vessel nozzles, whichever gives the greater distance.
- NOTE: (2) Assumed maximum liquid phase pipework diameter 40mm (1½") nominal bore, for the liquid oxygen piping.
- NOTE: (3) For buildings, the distances are measured to the nearest opening in the building e.g. doors, windows, ventilation openings.
- NOTE: (4) For tables 1, 2 & 3 see Tech Data Sheet No. G4309

Figure 7 Safety distances for cryogenic storage vessels (reproduced by kind permission of BOC and BCGA)

## SAFETY DISTANCES FOR LIQUID OXYGEN STORAGE 20 TONNES TO 200 TONNES NET LIQUID CAPACITY (DISTANCES IN METRES)

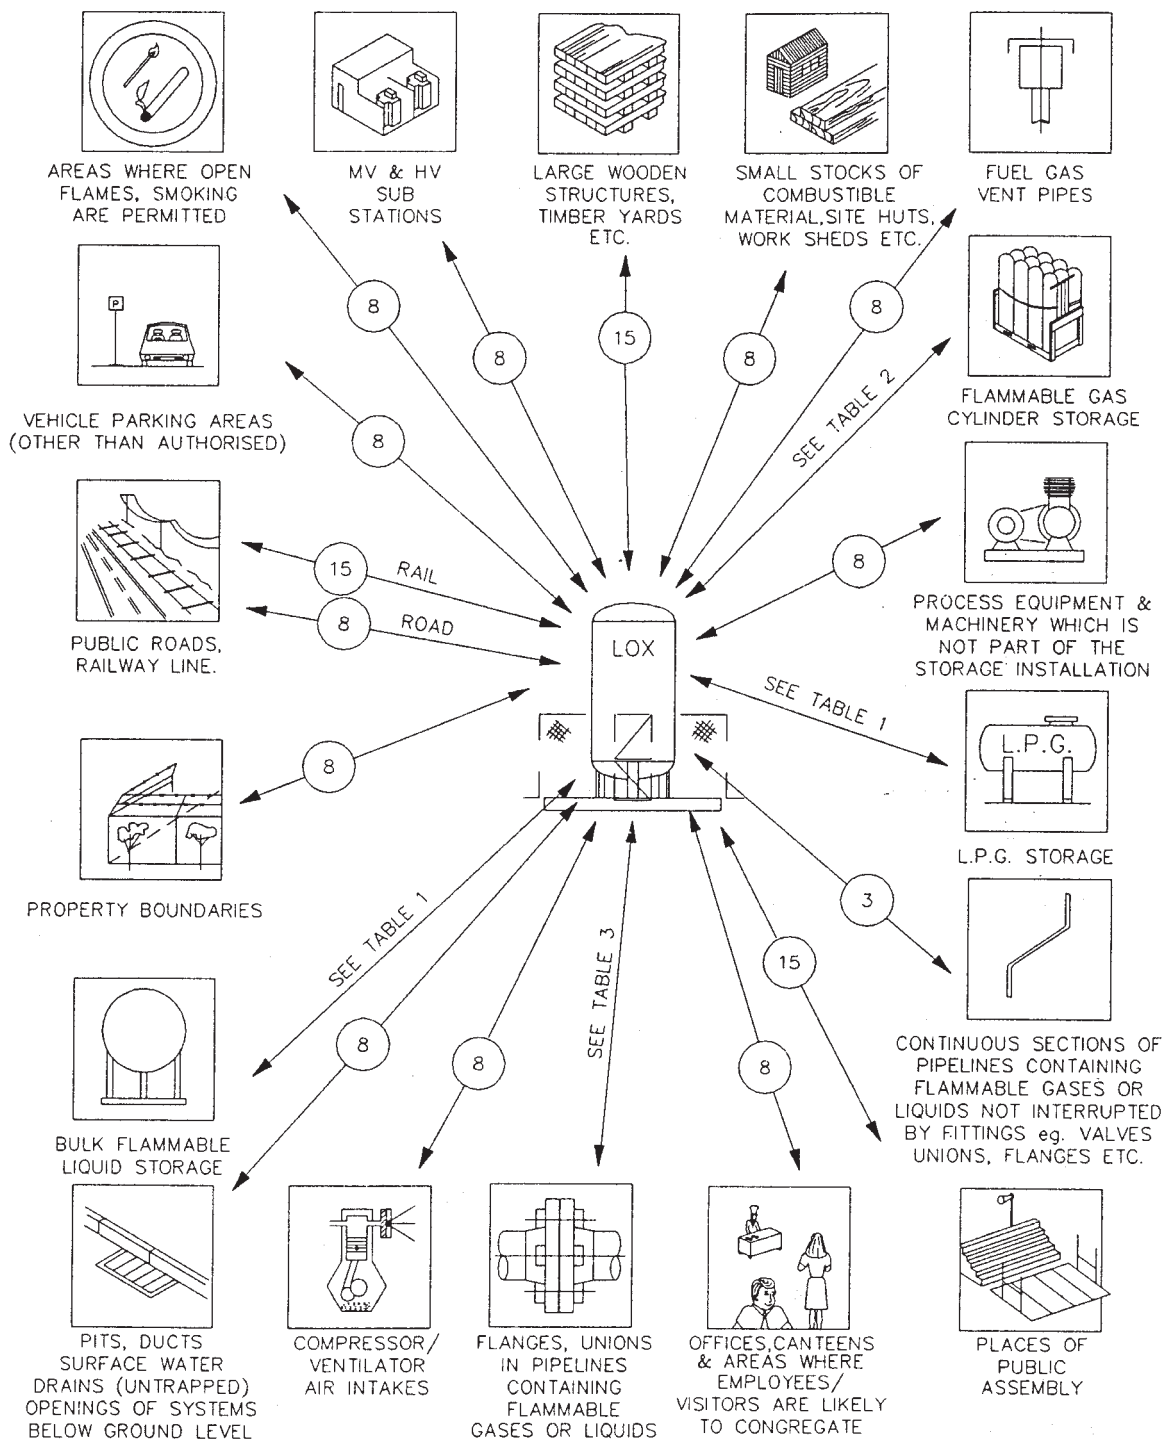

- NOTE: (1) The safety distances are measured from the exposure to
- any point on the storage system where in normal operation oxygen leakage or spillage can occur
  - the tank outer jacket.
  - or the vessel nozzles, whichever gives the greater distance.
- NOTE: (2) Assumed maximum liquid phase pipework diameter 50mm (2") nominal bore, for the liquid oxygen piping.
- NOTE: (3) For buildings, the distances are measured to the nearest opening in the building e.g. doors, windows, ventilation openings.
- NOTE: (4) For tables 1, 2 & 3 see Tech Data Sheet No. G4309

**6.33 Safety note: this is not the initial alarm condition of the system. The VIE (see user manual) is supplied with a differential pressure switch for liquid level alarm. The VIE user manual should describe in detail the operation and actions necessary should this alarm condition be initiated.**

**6.34** The VIE level alarm and “standby in use” alarm will remain on until the VIE is refilled.

#### **Standby low**

**6.35** Should no action be taken after VIE supply failure the standby system will supply until pressure falls to a pre-set pressure at which time a “**standby low**” alarm will be given.

#### **Low line pressure**

**6.36** Gas usage without VIE or cylinder replenishment will cause further pressure drop. At an outlet pressure of 3.75 bar g, a “**low line pressure**” alarm will be given. This alarm condition will also be initiated in the event of a regulator within the control panel failing shut or a pipeline failure.

#### **High line pressure**

**6.37** If a regulator within the control panel fails open, a high pressure alarm “**high line pressure**” will be given at 4.9 bar g.

**6.38** Emergency shutdown:

- a. in case of vessel safety valve blowing:
  - (i) close valve (liquid supply to vaporiser) to reduce VIE pressure to below 16 bar g;
  - (ii) notify the gas supplier immediately;
- b. in case of vessel bursting disc blowing:
  - (i) close valve (liquid supply to vaporiser) to reduce VIE pressure;
  - (ii) check that VIE pressure is below 16.0 bar g;
  - (iii) change valve to alternative bursting disc position;
  - (iv) notify the gas supplier immediately.

#### **VIE filling**

**6.39** After commissioning, subsequent filling of the VIE is controlled by the gas supplier. The driver should fill the VIE without disturbing the customer’s supply pressure or flow and without lifting safety valves or blowing bursting discs. After filling, the driver should report any defects to the gas supplier immediately.

*All users should check their own installations and ensure that they are aware of the operating instructions. The advice of the gas supplier should also be sought in cases of doubt.*

#### **Maintenance**

**6.40** Maintenance is the responsibility of the gas supplier, but there are customer checks which should be carried out daily and weekly. In addition, it will be necessary to test the alarm system.



*The high line pressure alarm requires specialist test equipment and the gas supplier should normally be contacted to carry out this test.*

**6.41** To test the alarm system, each alarm condition is initiated by the operation of a pressure switch. The control panel is supplied with three-way ball valves on the oxygen supply lines to each pressure switch. Rotation of these valve handles through 180° allows oxygen pressure to the pressure switches to be reduced, which operates the pressure switches and the appropriate alarms.

#### **Standby oxygen facility**

**6.42** A standby oxygen facility **must always** be provided.

**6.43** It should be sized to provide 24 hours' capacity, at average consumption, by bulk liquid, liquid cylinders or compressed gas cylinders.

**6.44** In the event of failure of the main VIE, the standby system should come into operation automatically. There should be a non-return valve to protect the standby system venting through the VIE in the event of a fault.

#### **Back-up bulk liquid storage vessel**

**6.45** This should be sized to provide 24 hours' supply at 50% capacity.

**6.46** To prevent unnecessary gas losses, the economiser circuit should be piped into the main supply distribution system downstream of the main vaporiser.

**6.47** The back-up vaporiser should be sized to provide 24 hours' usage at average flow rates.

#### **Liquid cylinder back-up**

**6.48** The number of liquid cylinders required will depend on the flow rate requirements, rather than the capacity.

**6.49** To prevent unnecessary gas losses, the economiser circuit should be piped into the main supply downstream of the main supply vaporiser.

#### **Compressed gas cylinder back-up**

**6.50** The minimum size of the back-up manifold should be a 2 x 5 (J-size cylinders).

**6.51** There should be sufficient additional cylinders on site to provide adequate back-up, and arrangements should be made to ensure that 24 hours' supply is available.

#### **Emergency supply facility**

**6.52** Where a risk assessment has identified a potentially vulnerable situation, such as a remote liquid facility separated from the hospital by roadways etc, then it may be advisable to consider an additional emergency supply facility.

6.0 System design – oxygen supplies

6.53 This may be either:

- a. a permanent manifold system, located within the main hospital complex;
- b. a portable manifold system (for example 2 x 1 J-size cylinders) mounted on a trolley for immediate use, to be connected via non-interchangeable screw thread (NIST) connectors for use in specific departments.

6.54 Where such a permanent manifold is installed, this may fulfil the standby requirements if appropriately sized.

6.55 For a permanent manifold, it should be fully automatic and protected by non-return valves and suitable valving arrangements (as indicated in the "Cylinder manifold installation" section of Chapter 5).

6.56 All cylinders, whether on VIE back-up or manifolds, should be routinely inspected and be subject to stock control procedures. Specific attention should be given to expiry dates on the batch label fitted to each cylinder.

6.57 All gas manifolds should be subject to routine maintenance.

**Alarm signal status unit**

6.58 The following indication of manifold conditions should be provided:

| Indication                               | Legend                     |
|------------------------------------------|----------------------------|
| a. green "normal"                        | normal                     |
| b. yellow "VIE low < 25%"                | re-fill liquid             |
| c. yellow "VIE empty, standby in use"    | re-fill liquid immediately |
| d. red "pressure in standby system <50%" | reserve low                |
| e. red "pipeline pressure fault"         | pressure fault             |

6.59 Conditions (b) to (e) should be transmitted to the central alarm system. Where relays are used, they should be normally energised relays which de-energise under fault conditions, with contacts having a minimum rating of 50 V dc, 50 mA.

6.60 Alternatively, volt-free, normally closed contacts rated at 50 V dc, 50 mA should be provided for transmission of conditions (b) to (e) to the alarm system.

6.61 The panel can be incorporated into the VIE control unit within the VIE compound, or be a separate unit within the enclosure. If mounted separately, the cabling should be monitored for open/short circuit. In the event of such a cabling fault, a red "system fault" lamp should be illuminated on the alarm signal status unit, together with the appropriate alarm condition.

## Liquid oxygen supplies

### General

**6.62** Traditionally, piped medical oxygen has been supplied from compressed gas cylinder manifolds or VIEs, depending upon the oxygen usage rate and storage requirements. The introduction of a supply by liquid cylinders provides greater flexibility of storage facility for mid-range gas volumes between the smaller compressed gas manifold capacities and the more substantial bulk liquid volumes.

**6.63** The advantages of medical oxygen liquid cylinders are:

- a. increased handling efficiency;
- b. labour saving for the hospital;
- c. improved safety environment;
- d. greater security of supply and stock holding;
- e. reduced manifold and cylinder space.

**6.64** A typical installation is shown in Figure 8. Due to increasing oxygen consumption, the use of telemetry systems to monitor cylinder contents is recommended. (See also telemetry systems for VIE systems in the “Bulk liquid oxygen” section of Chapter 6.)

### Liquid cylinder design

**6.65** Medical oxygen liquid cylinders are double-walled with vacuum and multi-layer insulation. They are suitable for transportation and storage of liquid oxygen, and provide a complete self-contained gas supply system for hospital use.

**6.66** Cylinders are designed and supplied with gas-specific liquid fill and gas use connections, as follows:

- a. Liquid fill – CGA 440;
- b. Gas use – ISO 5145.

### Liquid cylinder manifolds

**6.67** In practice, to cater for normal supply requirements, liquid cylinders will be required to be manifolded together with the attendant control panel, alarm and standby supply systems.

**6.68** The manifold is designed to allow a number of liquid cylinders to be manifolded together in such a way as to complement their particular operating characteristics, giving a single gas outlet point to the control panel.

### Control panel

**6.69** The control panel is designed to maintain an outlet pressure of 4.2 bar g at a required flow rate of up to 30 Nm<sup>3</sup>/hr (500 l/min).

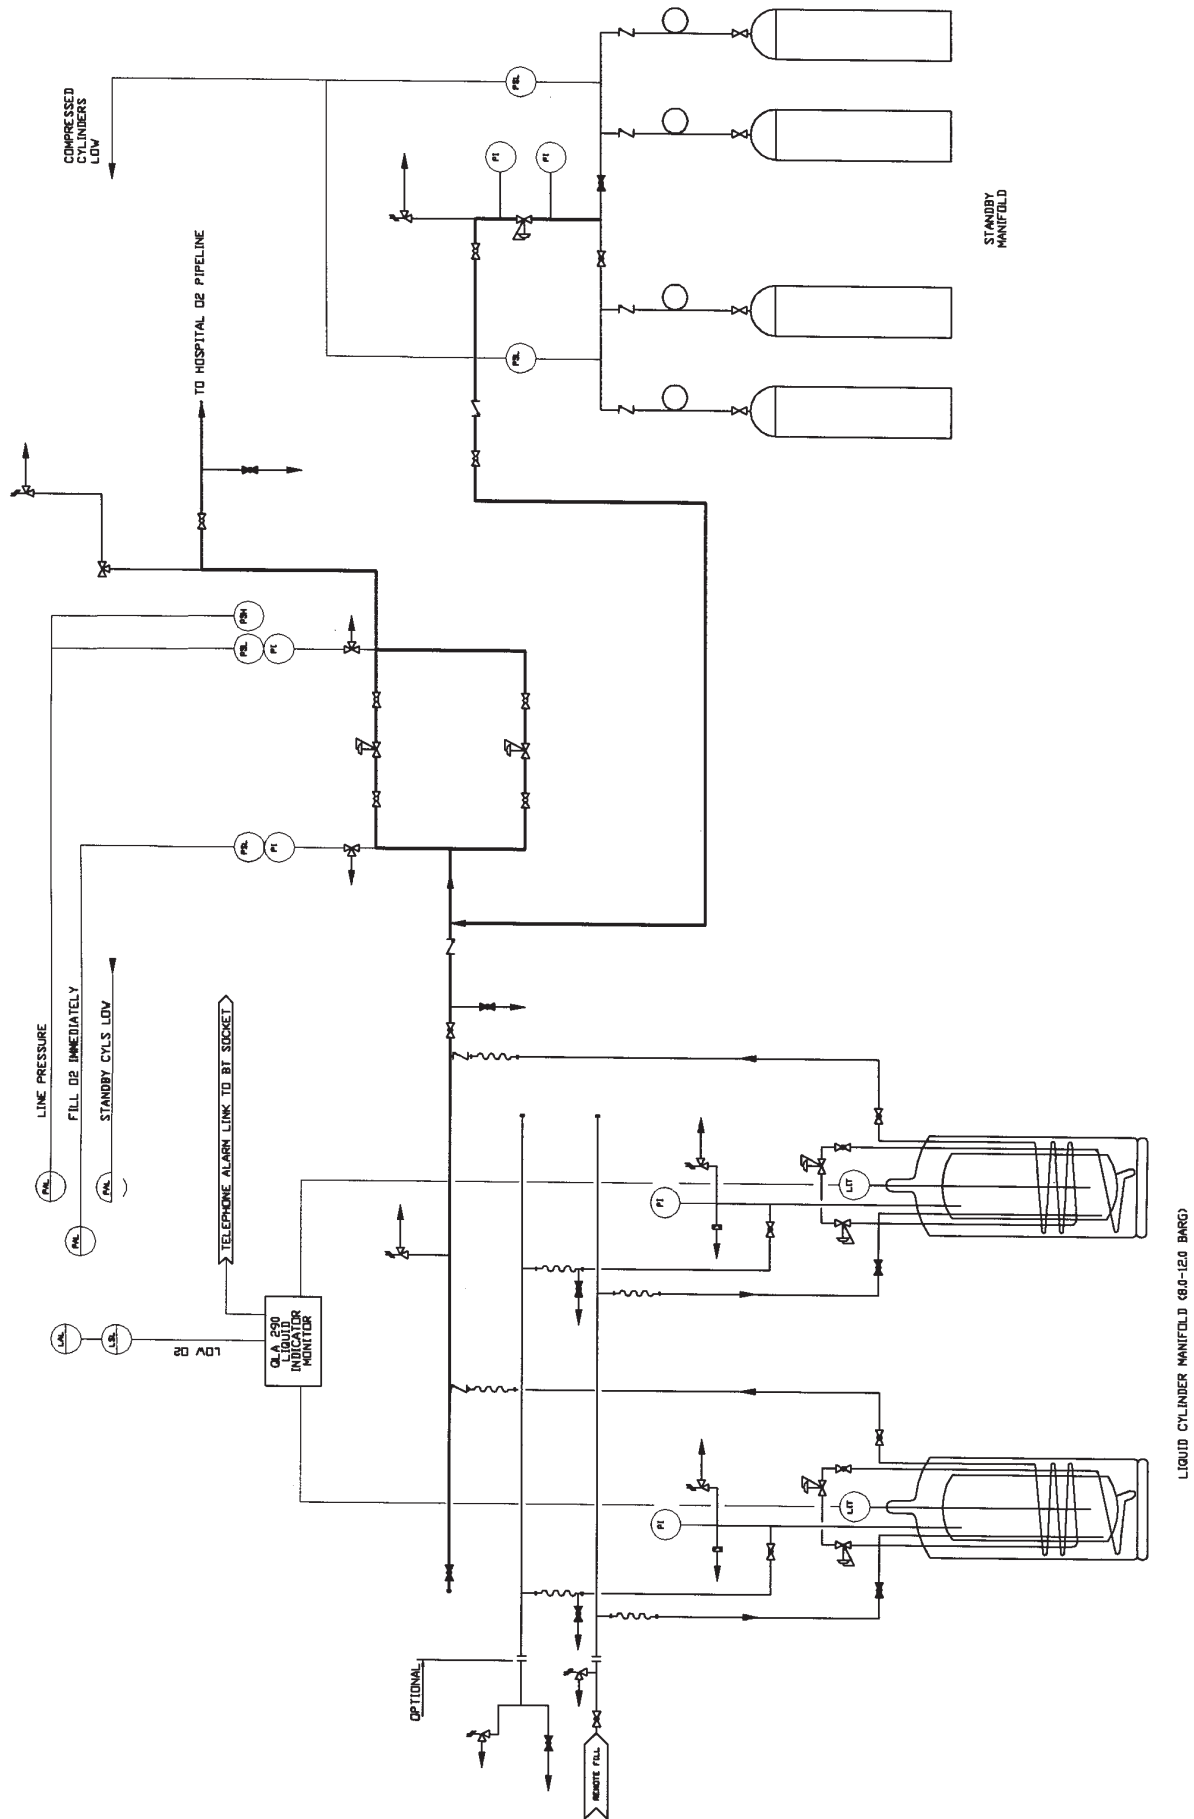

Figure 8 Typical liquid cylinder installation (reproduced by kind permission of BOC)

**6.70** The standby supply feeds into the control panel and, in the event of the liquid cylinder pressure dropping below a pre-set value, a flow of oxygen will commence automatically. This ensures that a constant supply of oxygen at the correct pressure is maintained.

#### **Emergency compressed oxygen manifold**

**6.71** The emergency oxygen supply consists of a manual or automatic changeover manifold which comes into operation automatically. The manifold size, and quantity of hospital stock, should be dictated by a particular hospital's requirements.

#### **Siting requirements**

**6.72** It is not recommended that liquid cylinders are installed within buildings; they should be installed in the open air in an enclosure designed for the purpose.

**6.73** Cylinder sites should be well-ventilated areas, away from any heat source.

**6.74** Where there is no alternative, a liquid cylinder manifold may be installed in a building or a confined area, but only if the vent header (to which all liquid cylinder vents will be connected) is piped to a safe area via a back pressure control valve. This valve should be set at a pressure below that of the liquid cylinder relief valve setting, thus ensuring any excess pressure is vented to a safe area in a safe manner.

**6.75** Where installed in buildings, generous ventilation should be provided by means of fully-louvred access doors to the outside.

**6.76** The appropriate calculation must be made to ensure that there is adequate ventilation.

**6.77** The site should be free from obstructions, with sufficient access to the liquid cylinders, manifold, control panel and fill point.

**6.78** The floor on which the liquid cylinders will be located (and where they will be filled) should be concrete hard-standing, strong enough to support the weight of the cylinders when full.

**6.79** The floor should be level but designed to avoid any accumulation of water in the vicinity of the liquid cylinders.

**6.80** The cylinders should be located at least 3 metres from:

- a. open sewers/drains;
- b. pits;
- c. trenches;
- d. any openings to underground rooms/enclosures;
- e. any combustible materials.

**6.81** For further guidance on liquid cylinder location, refer to EN 1251 'Cryogenic vessels – transportable vacuum insulated of not more than 1000 litre volume – operational requirements' and the BOC Guidance Notes, Form G4521.

### Liquid cylinder manifold sizing

**6.82** The manifold will be sized according to the average annual usage, with liquid cylinder installations being ideally suited to annual consumptions of between 3000 and 40,000 Nm<sup>3</sup> per annum.

**6.83** As the lower end of the medical VIE range reflects a minimum annual usage of approximately 27,500 Nm<sup>3</sup> per annum, there is an overlap of annual consumption between 27,500 Nm<sup>3</sup> and 40,000 Nm<sup>3</sup> per annum, where either a bulk VIE or a liquid cylinder installation could be considered to satisfy a particular requirement or accommodate possible site restrictions.

*One 200 litre liquid cylinder (LC 200) would have a capacity equal to approximately 24 J-sized cylinders*

### Refilling

**6.84** Refilling of liquid cylinders is carried out in situ, including pre- and post-analysis and certification of the cylinders. The cylinder manifold is equipped with a fill header which enables “remote” filling of multiple cylinders in situ.

### Alarm signal status unit

**6.85** The alarm signal status unit is the same as for VIE systems.

**6.86** The following indication of manifold conditions should be provided:

| Indication                                         | Legend                     |
|----------------------------------------------------|----------------------------|
| a. green “normal” indicator                        | normal                     |
| b. yellow “liquid low < 25%”                       | re-fill liquid             |
| c. yellow “liquid cylinders empty, standby in use” | re-fill liquid immediately |
| d. red “pressure in standby system < 50%”          | reserve low                |
| e. red “pipeline pressure fault”                   | pressure fault             |

Conditions (b) to (e) should be transmitted to the central alarm system. Where relays are used, they should be normally energised relays which de-energise under fault conditions, with contacts having a minimum rating of 50 V dc, 50 mA.

**6.87** Alternatively, volt-free, normally closed contacts rated at 50 V dc, 50 mA should be provided for transmission of conditions (a) to (e) to the alarm system.

**6.88** The panel can be incorporated into the liquid cylinder manifold control unit, or be a separate unit within the accommodation. If mounted separately, the cabling should be monitored for open/short circuit. In the event of such a cabling fault, a red “system fault” lamp should be illuminated on the alarm signal status unit, together with the appropriate alarm condition.

## Oxygen concentrator installations (PSA plant)

### General

**6.89** Oxygen concentrators or pressure swing adsorber (PSA) systems may be an alternative to the more traditional supply systems (the terms oxygen concentrator and PSA are interchangeable). Typical installations where PSA systems should be considered are those sites having no access to reliable liquid supplies, such as remote or off-shore sites or where the safety criteria for a bulk liquid vessel cannot be met (for example, very restricted sites). Otherwise, PSA systems should only be installed when an investment appraisal shows them to be economical.

**6.90** When installed, a PSA system will deliver product gas via the “oxygen” pipeline system.

**6.91** Oxygen concentrators operate by adsorbing, under pressure, other gases in the atmosphere onto materials which have specific physio-chemical properties, thus freeing the oxygen which is stored and transmitting it for use. The adsorbents are known as artificial zeolites and are more commonly referred to as molecular sieves. The sieves are arranged in pairs, one adsorbing whilst the other regenerates. The waste product, essentially nitrogen, is discharged to atmosphere during regeneration of the adsorbents. In some systems, the use of vacuum increases the efficiency of the regeneration/adsorption process. Regeneration requires the use of a small proportion of the product gas.

**6.92** The PSA process has reached a high level of technical sophistication and is capable of producing oxygen with a concentration of about 95%. (For the UK the minimum level, below which the emergency/reserve manifold will come into operation, is 94%.) The remainder is mainly argon with some nitrogen. The highest concentration is not likely to exceed 97/98%, except when the emergency/reserve manifold is in use, when it will be 100%.

**6.93** The major components of a PSA system and their layout are shown in Figure 9. The typical major components of the system are the compressors, receiver, dryers, molecular sieves, vacuum pumps, filters and regulators. Other components are identical to those used for medical air and vacuum plant, which are described fully in the appropriate sections. A suitable operating and indicating system is also required, as specified below. Package supply systems, which should be specified to meet the requirements given in this memorandum, are available from manufacturers.

### Siting

**6.94** The plant should have all-round access for maintenance purposes and allowance should be made for changing major components.

**6.95** The siting of the plant should allow for adequate flows of air for three different purposes:

- a. air intake to the compressors;
- b. cooling of the compressed air by the after-coolers;
- c. cooling of the compressors.

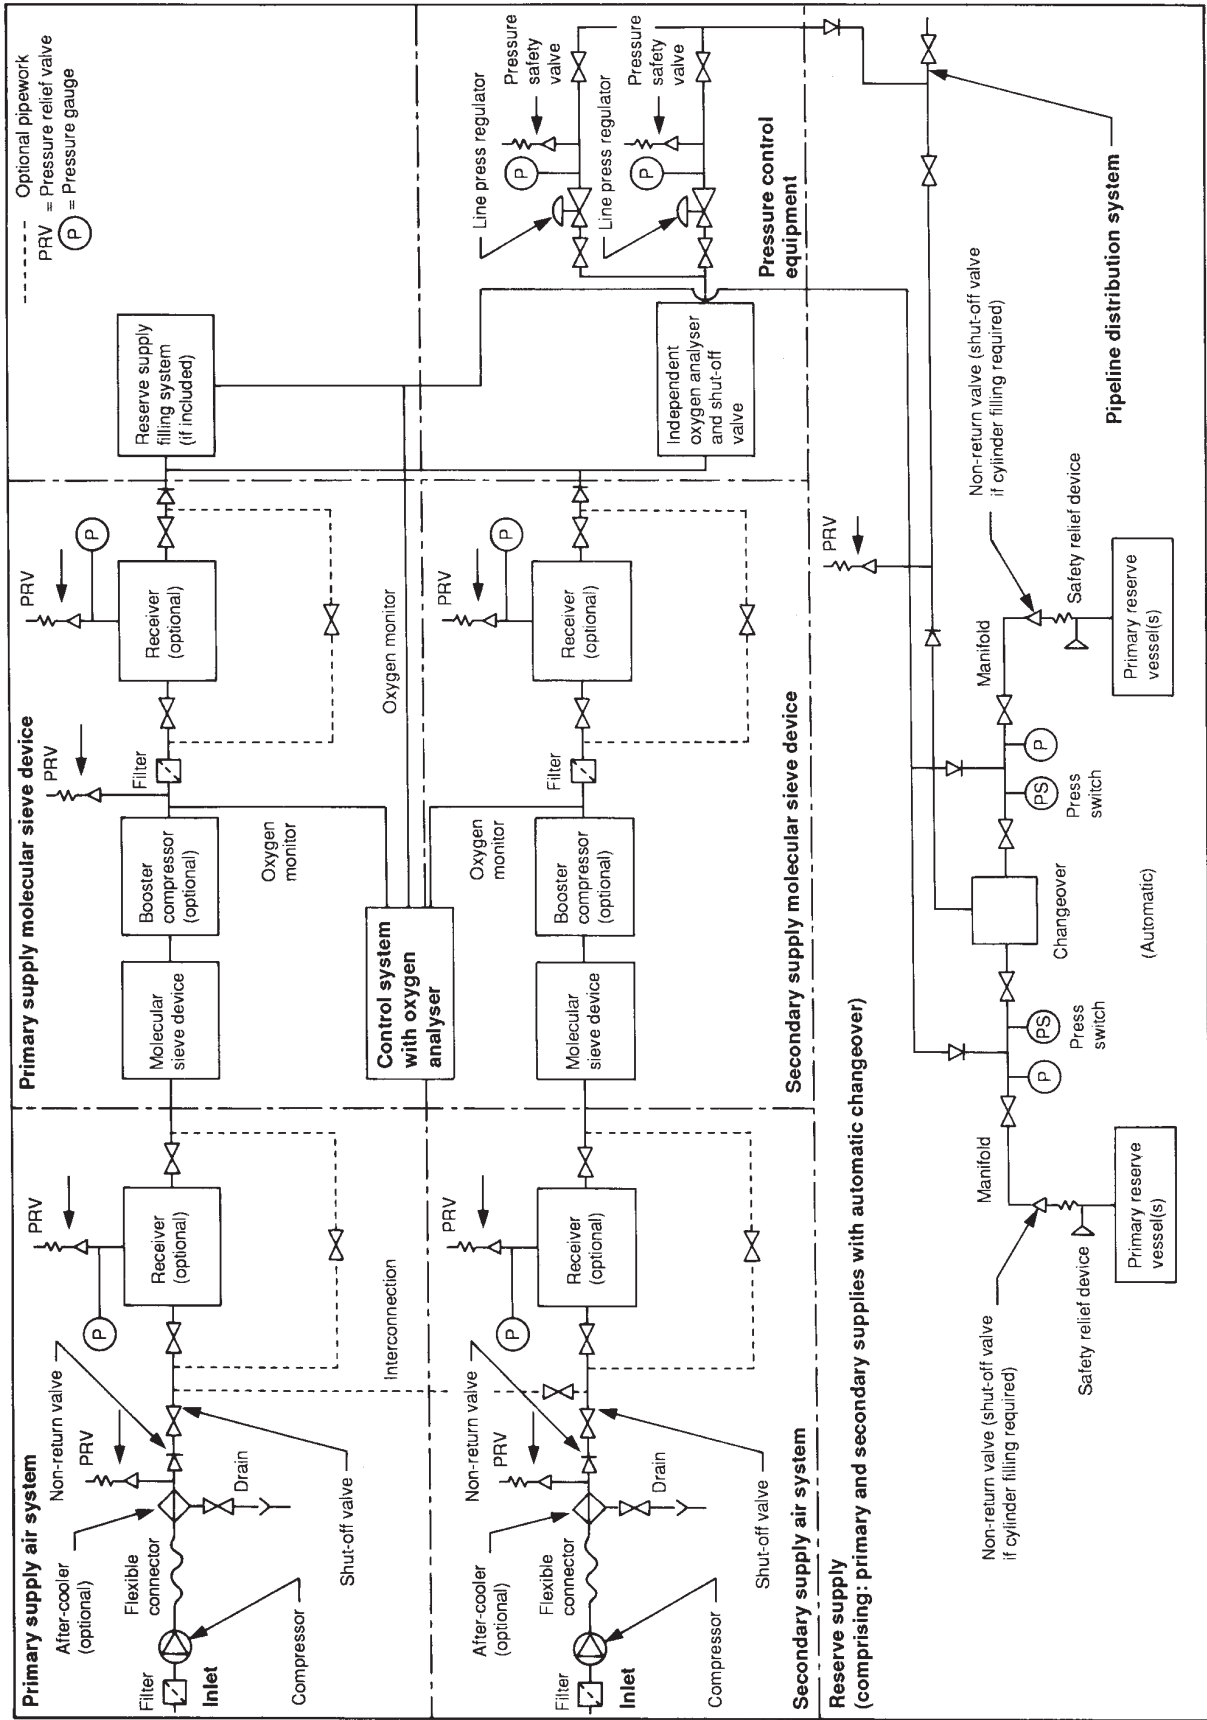

Figure 9 Schematic diagram of a typical PSA installation



**6.96** Each compressor may require ducting to ensure an adequate flow of cool air. The manufacturer should be consulted over the range of operating temperature for which the system is designed. In extreme circumstances, refrigeration of the cooling air may need to be provided.

**6.97** Air inlet filters should be fitted either to the compressor inlet or at a suitable point in any ductwork. The filters should comply with BS 7226:1989 and be either dry medium filters or grade CA paper element filters.

### Plant configuration

**6.98** The plant should comprise:

- a. duplex compressor – if more than two compressors are installed, the plant should provide the design flow with one compressor out of service;
- b. duplexed air treatment/molecular sieve devices, that is, two sets of filters and a pair of molecular sieves (one adsorbing whilst the other regenerates), and one vacuum pump (if required by the manufacturer).

**6.99** All duplexed components should be capable of independent operation.

### Compressors and vacuum pumps

**6.100** The compressors for the PSA systems may be any of the type recommended for compressed air systems. It is also possible to provide a combined medical air PSA plant. Generally, the compressed air requirement per litre of product gas is of the order 4:1, and as a result the compressor plant will be on longer than that typically seen in hospitals.

**6.101** A vacuum pump may be required as part of the system. The vacuum pump, if provided, is utilised during the adsorption/regeneration process. Vacuum pumps may be of any type as for the piped medical vacuum system. It will not generally be practicable to use water sealed pumps nor to utilise the medical vacuum plant.

### Compressor noise

**6.102** The noise level produced by the compressors will increase with the capacity of the supply system. The maximum free field noise level for unsilenced compressed air plant, at 1 m from the plant, varies with the type and power of the plant but should not normally exceed the following values:

| Reciprocating | Screw  | Vane   | Power      |
|---------------|--------|--------|------------|
| 85 dBA        | 76 dBA | 76 dBA | 7.5 kW     |
| 89 dBA        | 78 dBA | 76 dBA | 7.6–15 kW  |
| 93 dBA        | 80 dBA | 79 dBA | 15.1–22 kW |
| 97 dBA        | 92 dBA | 90 dBA | 22.1–60 kW |

**6.103** In noise-sensitive areas, an acoustic enclosure should be included in the purchase specification for all compressors. Such an enclosure should produce a reduction of at least 10 dBA in the free field noise level at 1 m.

### Molecular sieves

**6.104** Duplex molecular sieves should be provided in pairs to permit continuous generation of oxygen. One of the pairs of duplex sieves will be in the adsorbing stage, whilst the other regenerates.

### Dryers

**6.105** Air dryers of the desiccant type are usually integrated within the molecular sieves and therefore do not regenerate independently. Refrigerant dryers may also be included.

### Oxygen monitoring system

**6.106** The plant should include a calibrated paramagnetic oxygen monitoring system comprising oxygen analyser, oxygen concentration indicator, oxygen flow monitor and oxygen concentration/flow recorder. Connections for calibration cylinders should also be provided. In the event of the concentration falling below 94%, the monitoring system should isolate the PSA system from the pipeline distribution system so that the emergency/reserve manifold goes into operation. In addition to the above, an independent monitoring system should be provided to isolate the plant when the concentration falls below 94%. The second system need not be provided with a flow indicator or recorder.

### Operating and indicating system

**6.107** The operating and indicating system should perform the following functions, as appropriate:

- a. overall plant control and indication;
- b. individual compressor starting;
- c. individual vacuum pump starting (where fitted);
- d. control of dryers (where installed as separate component);
- e. control of molecular sieves;
- f. plant status monitoring and indication;
- g. optional indication of the plant alarm status (this function may be considered to be part of the alarm system).

**6.108** Provided that the individual compressor starters are housed in a separate compartment, these functions may be carried out by separate units or may be installed in a common panel and located on the plant or on the plantroom wall.

**6.109** Control panels containing pneumatic components should have vents to permit release of pressure in the event of component failure. All functions and indicators should be appropriately identified and should have a design life of at least five years. The operating system should be capable of automatically restarting after reinstatement of the power supply.

**6.110** All components of the PSA supply system should be connected to the standby electrical supply. The control system should ensure that compressors restart in sequence to avoid overloading the essential power supply.

### Plant control unit

**6.111** The plant control unit should have a separate power supply for each compressor and vacuum pump, controlled by a separate sub-circuit. The design should be such that no single component failure in the control unit will result in loss of plant output.

**6.112** The unit should allow either manual selection of duty/standby for each of the compressors or have an automatic sequence selection with a means for manual override. The unit should ensure that two or more compressors do not start simultaneously when power is applied.

**6.113** A warning notice which complies with BS 5378 should be affixed which indicates the presence of low voltage.

*The vacuum pump, if provided, forms part of the molecular sieve system.*

**6.114** Each compressor should have a selector switch which, when turned to the "on" position, allows the maximum and minimum pressure switches on the receiver to control the "on" and "off" loading of that compressor. An alternative "auto" position of the selector switch may allow automatic selection of the compressors.

### Plant control indication

**6.115** There should be indicators for each compressor as follows:

- a. green "mains supply on" ;
- b. green "compressor called for" which indicates that the compressor motor is electrically energised;
- c. an indicator of the pressure produced by the compressor.

### Compressor and vacuum starter units

**6.116** There should be individual starter units for each compressor and vacuum pump, which should include the features recommended for medical air compressor plants and vacuum plants respectively.

### Molecular sieve control unit

**6.117** The molecular sieve control unit may be mounted on the molecular sieve columns or may be located with the plant control unit. There should be separate power supplies for the "duty" and "standby" sieve assemblies, taken from the same phase.

**6.118** The molecular sieve control unit should contain the following:

- a. a duty selector switch;
- b. an on/auto selector switch;
- c. individually fused, separate cycling systems for each sieve pair;
- d. a system to control regeneration of the sieves in relation to pipeline demand;
- e. an oxygen concentration, dryness sensor and a pressure sensor;
- f. an automatic changeover to the standby molecular sieve system, in the event of failure of the duty unit by oxygen concentration, dryness or pressure. This requires:

## 6.0 System design – oxygen supplies

- (i) electrical and pneumatic isolation of the “duty” sub-assembly so that it is taken off-stream;
  - (ii) electrical and pneumatic energisation of the “standby” sub-assembly so that it is brought on-stream;
  - (iii) activation of the appropriate fault indicator and associated volt-free contacts;
  - (iv) the sub-assembly to remain in this mode of operation until the fault has been rectified;
- g. green function indicators for each dryer sub-assembly to indicate:
- (i) molecular sieve 1 selected;
  - (ii) molecular sieve 2 selected;
  - (iii) selected molecular sieve – “normal”;
  - (iv) selected molecular sieve – “failed” (this fault indicator should remain until manually reset by means of a reset button);
- h. a fail-safe system which on failure of the power supply causes the closure of all inlet, outlet, exhaust and purge valves.

### Plant status monitoring

**6.119** A monitoring system must be provided to detect the following faults in the air compressor system:

- a. plant faults (for each compressor):
- (i) control circuit failed;
  - (ii) overload tripped;
  - (iii) after-cooler temperature high;
  - (iv) compressor temperature high;
  - (v) compressor run-up time too long;
  - (vi) activation of other safety devices supplied by the manufacturers;
- b. plant faults (for each molecular sieve unit):
- (i) control circuit failed;
  - (ii) “vacuum pump called for”;
  - (iii) overload tripped;
  - (iv) activation of any of the safety devices supplied by the manufacturer;
  - (v) oxygen concentration failure;
  - (vi) pressure fault;
- c. plant emergency:
- (i) oxygen concentration failed at below 94% concentration;
  - (ii) receiver pressure 0.5 bar g below the standby cut in pressure;
  - (iii) dryness above 0.51 mg/m<sup>3</sup> (dewpoint –26°C at atmospheric pressure);
- d. pressure fault (cylinder reserve):
- (i) pressure in each bank below 50% (of normal cylinder pressure);
- e. pressure fault (pipeline):
- (i) low pipeline pressure;
  - (ii) high pipeline pressure.

### Plant status indicator unit

**6.120** In addition to the plant control indication, there should be a plant status indicator panel which may be mounted on the plantroom wall or adjacent to either the compressor starter unit or the plant control unit. It should have a warning notice which complies with BS 5378 to indicate the presence of low voltage.

**6.121** There should be indicators for each compressor to show the following conditions:

- a. green "mains supply on";
- b. yellow "control circuit failed";
- c. yellow "overload tripped";
- d. yellow "after-cooler temperature high";
- e. yellow "compressor temperature high";
- f. yellow for each individual safety device provided by the manufacturers;
- g. yellow "compressor failure".

**6.122** There should be indicators for each molecular sieve dryer system to show the following:

- a. green "mains supply on";
- b. yellow "oxygen concentration fault";
- c. yellow "pressure fault";
- d. yellow "dryness fault".

**6.123** When the standby dryer is in operation, conditions (b) and (c) (paragraph 6.122) should be transmitted as a plant emergency to either the alarm system or to the plant alarm signal status unit.

### Alarm signal status unit

**6.124** An alarm signal status unit should be provided as part of the control system. It should display the following conditions:

| Indication                                                                              | Legend                            |
|-----------------------------------------------------------------------------------------|-----------------------------------|
| a. green "normal"                                                                       | normal                            |
| b. yellow "plant fault"                                                                 | conditions b–f (see 6.121)        |
| c. yellow "plant emergency"                                                             | condition g (see 6.121)           |
| d. yellow "emergency/reserve low"                                                       | emergency/reserve banks low < 50% |
| e. yellow plant emergency<br>"pipeline concentration<br>below 94% O <sub>2</sub> fault" | pressure fault                    |
| f. red "pipeline pressure fault"                                                        | pressure fault.                   |

**6.125** Conditions (b) to (f) should be transmitted to the central alarm system. Where relays are used, they should be normally energised relays which de-energise under fault conditions, with contacts having a minimum rating of 50 V dc, 50 mA.

**6.126** Alternatively, volt-free, normally closed contacts rated at 5 Vdc, 50 mA should be provided for transmission of conditions (b) to (f) to the alarm system.

**6.127** The panel can be incorporated into the plant indicator unit or be a separate unit within the plantroom. If mounted separately, the cabling should be monitored for open/short circuit. In the event of such a cabling fault, a red “system fault” lamp should be illuminated on the alarm signal status unit, together with the appropriate alarm condition.

**6.128** The alarm signal status unit should be supplied from all individual plant control units, or from a separate common supply.

### **Plant management**

**6.129** Connections should be provided which allow monitoring (but not control) of the plant operation. For example: compressor – on, off, on-load, unloaded; molecular sieves – on or off. These connections should be used to provide input to the hospital energy management and building management systems.

## 7.0 System design – medical air

### Compressor systems for medical air 400 kPa

#### General

**7.1** The major components of a medical air system and their layout are shown in Figure 10. A suitable operating and indicating system is also required, as specified below. Appropriate layout and adequate siting of these components should be provided. Package supply systems which should be specified to meet the requirements given in this memorandum are available from manufacturers.

#### Quality

**7.2** The required quality level for medical air is specified by BS EN 132:1991. The requirements for maximum concentrations are given in Table 1. The European Pharmacopoeia (Ph Eur) specifies maximum impurity levels for carbon monoxide, carbon dioxide, sulphur dioxide, nitrogen monoxide and dioxide, moisture and oils. In future, it may be necessary for provision to be made to control the level of these contaminants and to monitor the supply to ensure conformance with the specification.

#### Siting

**7.3** The plant should have all-round access for maintenance purposes and allowance should be made for changing major components.

**7.4** The siting of the plant should allow for adequate flows of air for three different purposes:

- a. air intake to the compressors;
- b. cooling of the compressed air by the after-coolers;
- c. cooling of the compressors.

**7.5** Each compressor may require ducting to ensure an adequate flow of cool air. The manufacturer should be consulted over the range of operating temperature for which the system is designed.

**7.6** Air inlet filters should be fitted immediately upstream of the compressor. In exceptional circumstances, additional screens, filters and silencers may be required. The filters should comply with BS 7226:1989 and be either dry medium filters or grade CA paper element filters.

#### Compressor noise

**7.7** The noise level produced by the compressors will increase with the capacity of the supply system. The maximum free field noise level for unsilenced compressed air plant, at 1 m from the plant, varies with the type and power of the plant but should not normally exceed the following values:

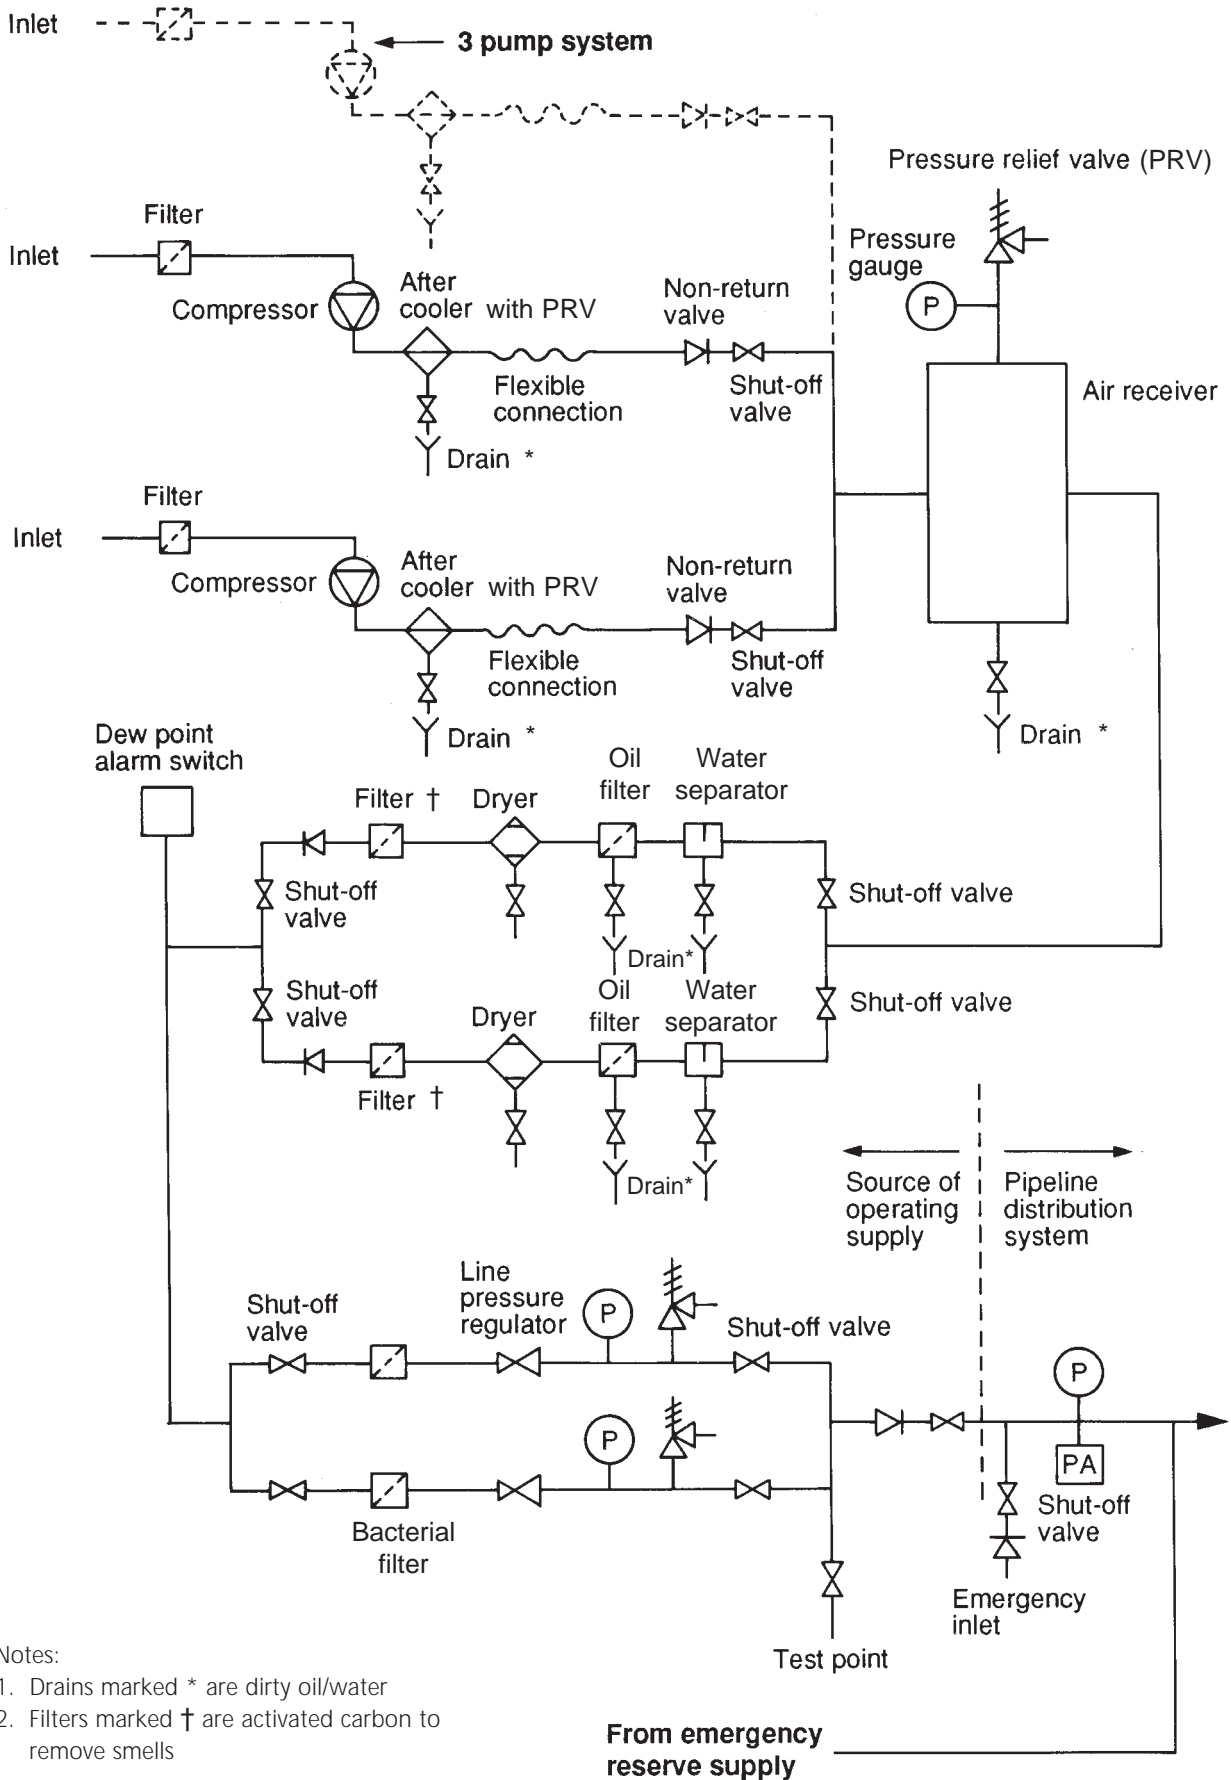

Figure 10 Typical medical air 400 kPa system (reproduced by kind permission of MIM)



| Reciprocating | Screw  | Vane   | Power      |
|---------------|--------|--------|------------|
| 85 dBA        | 76 dBA | 76 dBA | 0–7.5 kW   |
| 89 dBA        | 78 dBA | 76 dBA | 7.6–15 kW  |
| 93 dBA        | 80 dBA | 79 dBA | 15.1–22 kW |
| 97 dBA        | 92 dBA | 90 dBA | 22.1–60 kW |

**7.8** In noise-sensitive areas, an acoustic enclosure should be included in the purchase specification for all compressors. Such an enclosure should produce a reduction of at least 10 dBA in the free field noise level at 1 m.

### Air intake

**7.9** The air intake for a compressor should be located to minimise contamination from internal combustion engine exhausts and the discharge from vacuum systems, anaesthetic gas scavenging systems (AGSS) and ventilation systems or other sources of contaminants. Ideally, air intakes should be located at levels of at least 5 m above ground level.

### Compressor types

**7.10** There are many different types of compressor currently available in the market. Three types which are most commonly available are:

- a. reciprocating piston compressors;
- b. rotary vane compressors;
- c. rotary screw compressors.

**7.11** The compressors may be of any type, provided they are suitable for continuous running on load and for start/stop operation. If reciprocating compressors are used they may be either single or two stage, although for a 400 kPa system a single stage compressor is usually satisfactory.

**7.12** Compressors for medical air systems are selected by plant manufacturers from the range of units currently available for industrial users, and should be selected for their reliability and performance.

### Compressor lubrication

**7.13** Compressors may be oil-lubricated, provided that suitable arrangements are made to ensure that the air quality specification given in Table 1 is fulfilled.

**7.14** Rotary compressors are sealed and cooled by oil or water. Oil control is, therefore, essential and is usually provided as an integral part of the compressor. Reciprocating compressors may be oil-lubricated, carbon ring, PTFE ring or diaphragm-sealed type.

**7.15** Oil-free compressors may be beneficial in reducing filtration requirements.

**7.16** Where water is used as the sealant, it should be de-mineralised and the compressor should be provided with suitable feed water pre-treatment. Such treatment must ensure that there is no risk of microbial contamination to the air supply. In the event of failure of the water treatment system, the compressor should automatically shut down to prevent contamination.

## 7.0 System design – medical air

**7.17** There is a danger that PTFE rings and lubricating oils could decompose at high temperatures to form toxic products. This may be countered by fitting a temperature sensor to the cylinder head or output of the compressor with suitable controls to cut off the power supply to the compressors if excessive temperatures are sensed.

**7.18** On start-up, when oil is used as the sealant, moisture condensing at high pressure forms an emulsion. Once operating temperature is reached, water is readily separated. Because it is impossible to match the varying demand with plant capacity, it may be necessary to include oil heating to avoid emulsification. If it is intended to omit oil heaters, manufacturers should be asked to confirm the suitability of the compressor for intermittent operation. Oil-lubricated compressors, however, are considered to be satisfactory.

**7.19** Where oil-lubricated compressors are used, suitable means of separating oil from condensate should be provided.

**7.20** Once a compressor installation has been selected:

- a. the number required should be left to the supplier of the plant. The plant should include at least two compressors, but additional compressors may be included provided that in all cases the total capacity will provide 100% of system design flow with one compressor not running;
- b. the individual compressors should be arranged so that they will supply the system simultaneously if necessary;
- c. the relative magnitude of the capital and running costs should be evaluated at the time of purchase. Too much emphasis has been placed on low capital cost at the expense of reliability and high power costs. The running costs should be calculated at realistic levels of usage;
- d. the control system for the compressor plant should include an “hours-run” counter and should be constructed in accordance with the guidelines given below;
- e. the efficiency of plant, expressed as the volume of air delivered to the pipeline distribution system (after losses in the drying system) per kilowatt-hour, should be stated by the supplier of the system. The commissioning procedure should evaluate this efficiency by testing the power consumption over a suitable period of time at 100%, 10% and 0% of the system design flow. A minimum efficiency of 5 m<sup>3</sup>/kWh at 100% and 10% is required. The power consumption at zero flow should be less than 1% of that at 100% design flow.

### After-coolers

**7.21** After-coolers (and inter-coolers) usually form part of the compressor sub-assembly. After-coolers should be fitted to oil-lubricated medical air compressor systems, but may not be required on water-sealed screw compressors. These will normally be air-cooled and may need ducting with forced ventilation to ensure an adequate supply of cooling air.

### Receivers

**7.22** Air receivers should comply with BS 5169:1992 Class 3 and should be supplied with test certificates. The minimum water capacity of the receivers should be 50% of the compressor output in 1 minute, stated in terms of free

air delivered at normal working pressure. Receivers should also be fitted with an automatic drain.

**7.23** To facilitate the statutory inspection, there should be either two suitably-valved air receivers, or a by-pass arrangement (for use in manual operating mode only) in order to avoid interruption to the supply.

### **Air treatment and filtration**

#### *General*

**7.24** Contaminants can enter the compressed air system from three sources: the atmosphere, the compressor and the pipeline distribution system. Each potential source must be taken into account when specifying the type and location of air treatment equipment. Filtration equipment may include pre-filters, coalescing filters, carbon filters, particulate filters and any other additional filtration equipment necessary to provide the appropriate quality.

#### *Solid contaminants*

**7.25** Dirt particles in the environment cover a wide range of sizes, but approximately 80% are less than 0.2  $\mu\text{m}$  and are therefore not removed by the intake filter to the compressor.

**7.26** Although particles smaller than 40  $\mu\text{m}$  are unlikely to cause mechanical damage, a 5  $\mu\text{m}$  intake filter is preferred, to avoid blockage of internal air/oil separators.

**7.27** There are a number of methods for measuring particle size and concentration, such as cascade impactors, particle counters, light dispersion photometers, laser counters etc. None of these is suitable for sampling from a compressed air pipeline.

**7.28** Filters are specified in terms of performance tests, for example, sodium flame test, DOP test, etc.

#### *Water*

**7.29** Water is always a contaminant in a compressed air system, regardless of the type and location of the compressor plant, since the air drawn into the compressor intake is never completely free of water vapour. The amount can vary from 2.5  $\text{g}/\text{m}^3$  to over 40  $\text{g}/\text{m}^3$ , depending on the climatic conditions. Some of this is removed by the after-cooler and receiver, but about 20  $\text{g}/\text{m}^3$  is likely to remain in the compressed air unless removed by dryers.

**7.30** A water content to not exceed 115 VPM (0.095  $\text{mg}/\text{l}$  equivalent to dewpoint  $-40^\circ\text{C}$  at atmospheric pressure) is specified for medical air pipeline systems. This can usually only be achieved by desiccant dryers; refrigeration dryers can only perform satisfactorily down to a pressure dewpoint of about  $+3^\circ\text{C}$  and are therefore not recommended as the sole form of drying.

#### *Oil*

**7.31** With oil-lubricated compressors, it is inevitable that the compressed air contains oil. Even with oil-free compressors (non-lubricated), complete freedom from oil and oil vapour cannot be positively guaranteed, as

## 7.0 System design – medical air

hydrocarbon vapours may be drawn into the compressor. Oil levels in the air supply must be controlled to 0.1 mg/m<sup>3</sup>, with means of monitoring on a routine basis.

**7.32** Oil will exist in the system in three forms: bulk liquid, oil aerosol and oil vapour. Provided that the oil lubricant is appropriate and the after-cooler properly designed, the amount of oil present as vapour should be small and is unlikely to exceed 0.5 mg/m<sup>3</sup>.

**7.33** The amount of oil present as bulk liquid and aerosol present in a compressed air system is more difficult to predict. With modern, well maintained oil lubricated compressors it is unlikely to exceed 5 mg/m<sup>3</sup> due to the high efficiency oil/air separator.

**7.34** Oil-contaminated compressor condensate is classified as a trade effluent by virtue of section 14 of the Public Health (drainage of trade premises) Act 1937. An oil condensate separator should therefore be installed.

**7.35** Under the Water Resources Act 1991 section 85, it is illegal to make a discharge of trade effluent to “controlled waters” via a surface water drain without the consent of the National Rivers Authority.

*The maximum limits of oil in water are from 5 mg/l up to 15 mg/l*

**7.36** Similarly, under the Water Industries Act 1991, Regional Water Authorities enforce the limit of oil condensate discharged into the public foul sewer. Prior consent to discharge is mandatory.

*Maximum limits range from region to region, from 25 mg/l up to 500 mg/l; the local Water Authority should be consulted*

**7.37** Condensate from oil-free compressors may be discharged to drain.

**7.38** Any condensate produced from the compressor/dryer system must be regarded as trade effluent, and is therefore not suitable for discharge to any surface water system draining to any surface water sewer, water-course or soak away; this may not apply if a suitable separator is installed.

### *Dryer controls*

**7.39** The dryer control system should ensure that regeneration is operated in proportion to the compressed air usage. The effectiveness of the control system will become apparent when the efficiency of the compressor system is tested at 10% and 0% of the system design flow. Evidence of the reliability and performance of a dryer system should be sought from manufacturers, since these items are critical to the overall performance of the compressor system. The dryer control system should include a dewpoint meter.

### *Dust filters*

**7.40** There should be a dust filter downstream of the dryers to remove particles down to 1 µm, with a DOP penetration of less than 0.03%, when tested in accordance with BS 3928.

**7.41** Each dryer and filter assembly should be rated for continuous use at the system demand flow, with air at 100% relative humidity at 35°C.

### *Activated carbon filter*

**7.42** Duplex activated carbon filters should be installed upstream of the final bacterial filter.

*Bacteria filters*

**7.43** Duplex bacterial filters should be fitted upstream of the final pressure regulator with appropriate isolating valves. The filters should provide particle removal to 0.01 mg/m<sup>3</sup> and a DOP penetration of less than 0.0001%.

**Pressure control**

**7.44** The pressure control should maintain the nominal pipeline pressure within limits given in Appendix K. Duplex line pressure regulators should be provided with suitable isolating valves. The regulators should be of the non-relieving type.

*Test point*

**7.45** A test point comprising shut-off valve and terminal unit should be provided to permit sampling of the medical air quality.

*Safety valves*

**7.46** Safety valves should be provided in accordance with the system requirements given below. All safety valves should conform to BS 6759 Part 2:1984. A safety valve of the certified discharge capacity stated should be fitted in each of the following positions:

- a. on the delivery pipe of each compressor and upstream of any isolating valve, non-return valve or after-cooler, capable of discharging the total throughput of the compressor;
- b. on each air receiver and dryer tower, capable of discharging the sum of the throughput of all the compressors. It is not necessary to provide safety valves on the dryer columns where the system is already protected by a safety valve on the receiver and the downstream equipment, that is, if the dryer column is already sufficiently protected;
- c. immediately downstream of each pressure regulator, capable of discharging the system demand flow.

**7.47** All safety valves should be of the closed bonnet type and connected to suitably-sized pipework to allow safe discharge, not necessarily to the outside. The set pressure of the safety valves should be as given in Appendix K.

**Traps and valves***Automatic drainage traps*

*See paragraphs 7.34 to 7.39 for effluent discharge requirements*

**7.48** Electrically or mechanically operated automatic drainage traps should be provided on the after-coolers, receiver, separators and coalescing filters. The discharge from these drainage traps should be piped to a suitable gully. Co-ordination with building work is required for this provision.

**7.49** Drainage and tun-dishes are usually provided under the building contract. Separators should be provided under the air compressor contract. Provision of interceptor tanks may be provided under either the building contract or the air compressor contract, as appropriate.

*Non-return valves*

**7.50** Non-return valves are required to prevent backflow of the air supply in certain situations. These valves should be located as follows:

- a. between the compressor and the receiver, but downstream of any flexible connector;
- b. downstream of the dust filter on the dryer;
- c. upstream of the emergency cylinder reserve connection in the pipeline connecting the plant to the pipeline distribution system, to prevent back feeding this plant;
- d. upstream of any inlet point which may be used to feed the system in an emergency;
- e. downstream of the emergency cylinder manifold regulators.

*Isolating valves*

**7.51** Isolating valves should be provided downstream of non-return valves and upstream of, for example, the connection of the emergency reserve manifold. Isolating valves should be provided in order to facilitate maintenance or replacement of plant items.

**7.52** Manually-operated ball isolation valves should be located in the positions shown in Figure 10, to allow isolation of components such as receivers, dryers, automatic drains, pressure regulators and filters. There should also be a valve on the compressed air plant, upstream of the non-return valve and the connection of the emergency cylinder reserve.

*Pressure indicators*

**7.53** Pressure indicators should comply with BS 1780:1985 (1992), or have an equivalent performance if electronic indicators are used. Calibration should be in bar g or kPa. All gauges should have a minimum scale length of 90 mm, and the working range should not exceed 65% of the full scale range, except on differential pressure gauges. Where digital gauges are provided, the height of the display should not be less than 14 mm. Pressure indicators should be connected by means of gauge cocks.

**7.54** Pressure indicators should be located:

- a. on the plant control unit indicating receiver pressure;
- b. on each receiver;
- c. downstream of each pressure regulator;
- d. on each dryer tower;
- e. on the plantroom pipework, downstream of the plant isolating valve;
- f. on the test point.

**7.55** Differential pressure indicators should be located on:

- a. each coalescing filter;
- b. each dust filter;
- c. each bacterial filter;

or any combination, as appropriate.

**7.56** All control devices should be connected directly to the pipework via a minimum leak device (to allow removal for servicing) and not isolated by valves. Gauges should be isolated for maintenance purposes by gauge cocks.

### **Operating and indicating system**

**7.57** The operating and indicating system should perform the following functions:

- a. overall plant control and indication;
- b. individual compressor starting;
- c. control of dryers;
- d. plant status monitoring and indication;
- e. indication of the plant alarm status.

**7.58** Provided that the individual compressor starters are housed in a separate compartment, these functions may be carried out by separate units or may be installed in a common panel and located on the plant or on the plantroom wall. Control panels containing components should have vents to permit release of pressure in the event of component failure. All indicators should be appropriately identified and should have a design life of at least one year.

**7.59** The operating system should be capable of automatically restarting after reinstatement of the power supply.

**7.60** All components of the medical air supply system should be connected to the standby electrical supply. The control system should ensure that compressors restart in sequence to avoid overloading the essential power supply.

### **Plant control unit**

**7.61** The plant control unit should have a separate power supply for each compressor, controlled by a separate sub-circuit.

**7.62** The unit should allow either manual selection of duty/standby for each of the compressors or have an automatic sequence selection with a means for manual override. The unit should ensure that two or more compressors do not start simultaneously when power is applied.

**7.63** A warning notice which complies with BS 5378 should be affixed which indicates the presence of low voltage.

### **Plant control indication**

**7.64** There should be indicators for each compressor as follows:

- a. green " mains supply on" ;
- b. green " compressor called for" which indicates that the compressor motor is electrically energised;
- c. an indicator of the pressure produced by the compressor.

### Compressor starter units

**7.65** There should be individual starter units for each compressor which operate a single designated compressor. The starters should be provided with safety interlocks, as specified by the compressor manufacturers, which should inhibit plant operation until manually reset by means of a button. The starters should allow automatic restart after an interruption to the power supply. Each starter unit should contain the following:

- a. an isolator interlocked with the covers;
- b. either HRC fuses to BS 88 or suitable circuit breakers to BS EN 60947-2 and/or BS EN 60898;
- c. an industrial grade ammeter to BS 89;
- d. a “total hours” counter if not included in the plant control unit;
- e. a green “mains supply on” indicator if mounted separately from the plant control unit.

### Dryer control unit

**7.66** The dryer control unit may be mounted on the dryers or may be located with the plant control unit. There should be separate power supplies for the “duty” and “standby” dryer assemblies taken from the same phase.

**7.67** The dryer control unit should contain the following:

- a. a duty dryer selector switch;
- b. a service function – to enable selection of continuous/normal running;
- c. individually fused, separate cycling systems for each dryer;
- d. a system to control regeneration of the dryers in relation to pipeline demand;
- e. a dewpoint meter and a pressure sensor;
- f. an automatic changeover to the standby dryer system in the event of failure of the duty unit by either dryness or pressure. This requires:
  - (i) electrical and pneumatic isolation of the “duty” sub-assembly so that it is taken off-stream;
  - (ii) electrical and pneumatic energisation of the “standby” sub-assembly so that it is brought on-stream;
  - (iii) activation of the appropriate fault indicator and associated volt-free contacts;
  - (iv) the sub-assembly to remain in this mode of operation until the fault has been rectified;
- g. green function indicators for each dryer sub-assembly to indicate:
  - (i) dryer 1 selected;
  - (ii) dryer 2 selected;
  - (iii) selected dryer – “Normal”;
  - (iv) selected dryer – “failed” (this fault indicator should remain until manually reset by means of a reset button);
- h. a fail-safe system which on failure of the power supply causes the following:
  - (i) closure of the exhaust and purge valves;
  - (ii) opening of the inlet and outlet valves.



### Plant status monitoring

**7.68** A monitoring system should be provided to detect the following faults in the air compressor system:

- a. plant faults (for each compressor):
  - (i) control circuit failed;
  - (ii) motor tripped;
  - (iii) after-cooler temperature high;
  - (iv) compressor temperature high;
  - (v) compressor failed to go on load;
  - (vi) activation of other safety devices supplied by the manufacturers;
- b. plant faults (for each dryer unit):
  - (i) dryer failure;
  - (ii) pressure fault;
- c. plant emergency:
  - (i) receiver pressure 0.5 bar below the standby cut in pressure;
  - (ii) receiver pressure 0.5 bar above cut out pressure;
  - (iii) dryness above 0.51 mg/m<sup>3</sup> (dewpoint at -26°C at atmospheric pressure);
- d. pressure fault (cylinder reserve):
  - (i) pressure in duty bank below 50% (of normal cylinder pressure);
- e. pressure fault (pipeline):
  - (i) low pipeline pressure;
  - (ii) high pipeline pressure.

### Plant status indicator unit

**7.69** In addition to the plant control indication, there should be a plant status indicator panel which may be mounted on the plantroom wall or adjacent to either the compressor starter unit or the plant control unit. It should have a warning notice which complies with BS 5378 to indicate the presence of low voltage.

**7.70** There should be indicators for each compressor to show the following conditions:

- a. green "mains supply on";
- b. yellow "control circuit failed";
- c. yellow "overload tripped";
- d. yellow "after-cooler temperature high";
- e. yellow "compressor temperature high";
- f. yellow for each individual safety device provided by the manufacturers;
- g. yellow "compressor failure".

**7.71** There should be indicators for each dryer system to show the following:

- a. green "mains supply on";
- b. yellow "dryness fault";
- c. yellow "pressure fault".

### Alarm signal status unit

**7.72** An alarm signal status unit should be provided as part of the control system. It should display the following conditions:

| Indication                       | Legend                                                                  |
|----------------------------------|-------------------------------------------------------------------------|
| a. green "normal"                | normal                                                                  |
| b. yellow "plant fault"          | conditions (b–g), see 7.70;<br>(c), see 7.71                            |
| c. yellow "plant emergency"      | low reservoir pressure; high moisture, that is, condition (b), see 7.71 |
| d. yellow "reserve low"          | emergency/reserve banks low (<50%)                                      |
| e. red "pipeline pressure fault" | pressure fault                                                          |

**7.73** Conditions (b) to (e) should be transmitted to the central alarm system. Where relays are used, they should be normally energised relays which de-energise under fault conditions, with contacts having a minimum rating of 50 V dc, 50 mA.

**7.74** Alternatively, volt-free, normally closed contacts rated at 50 V dc, 50 mA should be provided for transmission of conditions (b) to (e) to the alarm system.

**7.75** The panel can be incorporated into the plant indicator unit, or be a separate unit within the plantroom. If mounted separately, the cabling should be monitored for open/short circuit. In the event of such a cabling fault, a red "system fault" lamp should be illuminated on the alarm signal status unit, together with the appropriate alarm condition.

**7.76** The alarm signal status unit should be supplied from all individual plant control units, or from a separate common supply.

### Plant management

**7.77** Connections should be provided which allow monitoring of plant alarm conditions (b) to (e) and pump running for each "compressor". These connections should be volt-free contacts normally closed for each condition having a minimum rating of 50 V dc, 50 mA. The building management system should not be used to control the plant.

### Operating considerations

**7.78** Plant should be operated in accordance with the manufacturer's instructions and covered by a sound, effective, planned preventative maintenance (PPM) policy.

## Synthetic air

### General

**7.79** This section gives technical details of the process and systems required to generate medical air from mixing gaseous oxygen and nitrogen, derived from a cryogenic supply.

**7.80** For the purposes of the Medicines Act, it is considered that the synthetic air is manufactured on-site, for use on that site only, in exactly the same way as for medical air derived from compressor plant.

**7.81** The production of synthetic air implies a manufacturing process, and as such the process should be subjected to the same safety requirements as for a pharmaceutical process. This should include, for example, a HAZOP analysis and other safety analyses which may be necessary.

**7.82** Synthetic air is generated by mixing gaseous oxygen and nitrogen in a blender or mixing panel at pre-set pressures to ensure that the resultant mixture is always correct. Continuous on-line monitoring of oxygen concentration is provided to check the mixture; the system shuts down automatically in the event of out-of-specification concentration.

**7.83** In the event that one mixing systems shuts down, the pipeline is supplied from the back-up mixing system to ensure continuity of supply.

**7.84** The feasibility study should provide more information on the details of the monitoring and alarm systems required, as well as operational information.

**7.85** The vacuum insulated evaporator (VIE) system supplying the medical oxygen may be used to supply the synthetic air system, depending on the actual system demands.

**7.86** Nitrogen supplied to the synthetic air system may also be used to provide the power source for surgical tools instead of surgical air at 700 kPa.

**7.87** An electrical power supply is required in order, for example, to operate solenoid valves and monitoring instrumentation. Therefore the system should be on the essential power supply and connected via an uninterruptable power supply (UPS) with at least 4 hours' capacity. This should ensure continuity of supply in the event of power failure.

### System description

**7.88** The gaseous oxygen and nitrogen are derived from bulk liquid supplies contained in a VIE – as described in the "Liquid oxygen supplies" section of Chapter 6.

**7.89** The oxygen for synthetic air may be taken from the VIE supplying the medical oxygen system or it may be from a dedicated VIE. It would normally be more cost-effective for the oxygen to be taken from the main VIE, although this would obviously depend on the existing VIE capacity, the demand, space constraints etc. The feasibility study should provide more detailed information on whether it is likely to be more cost-effective to provide a totally separate VIE system or to use the existing medical oxygen VIE.

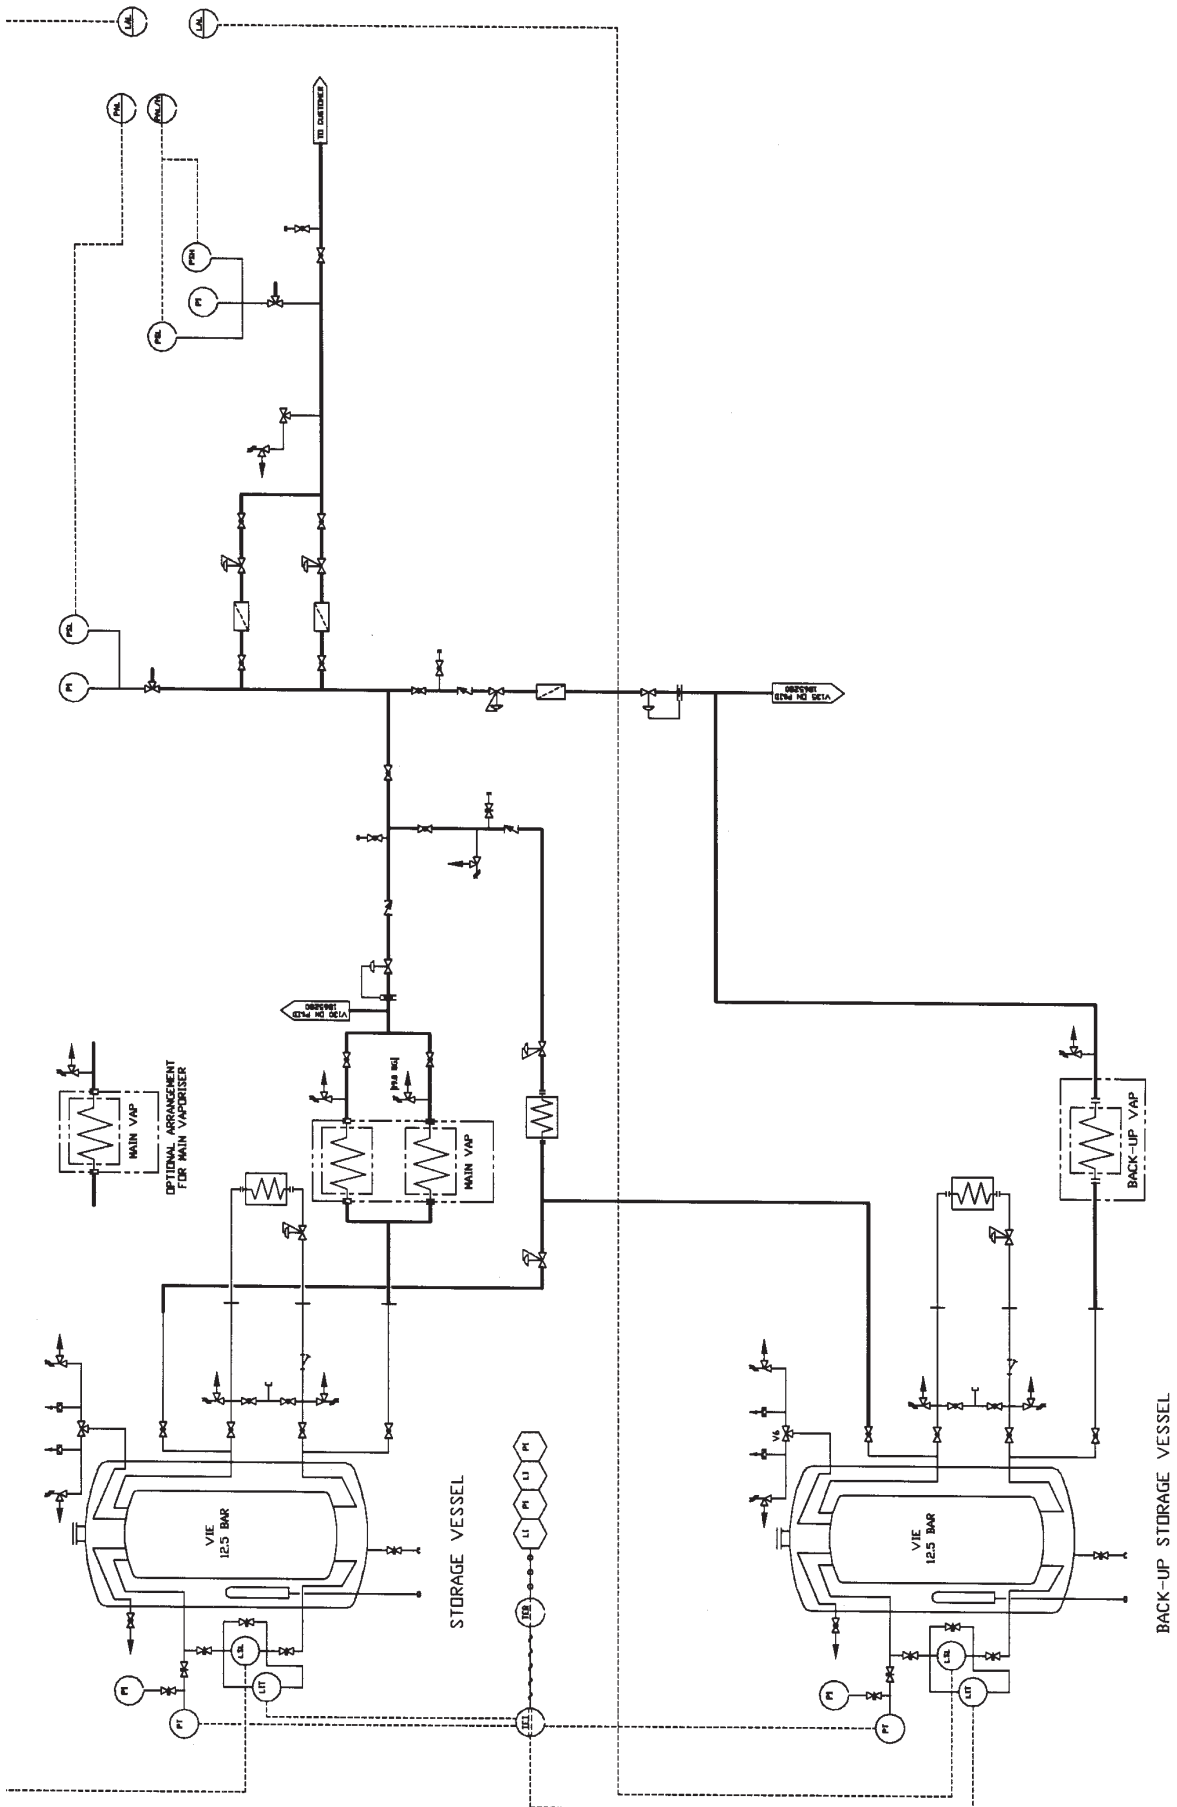

Figure 11 Typical synthetic air layout – oxygen VIE supply (reproduced by kind permission of BOC)

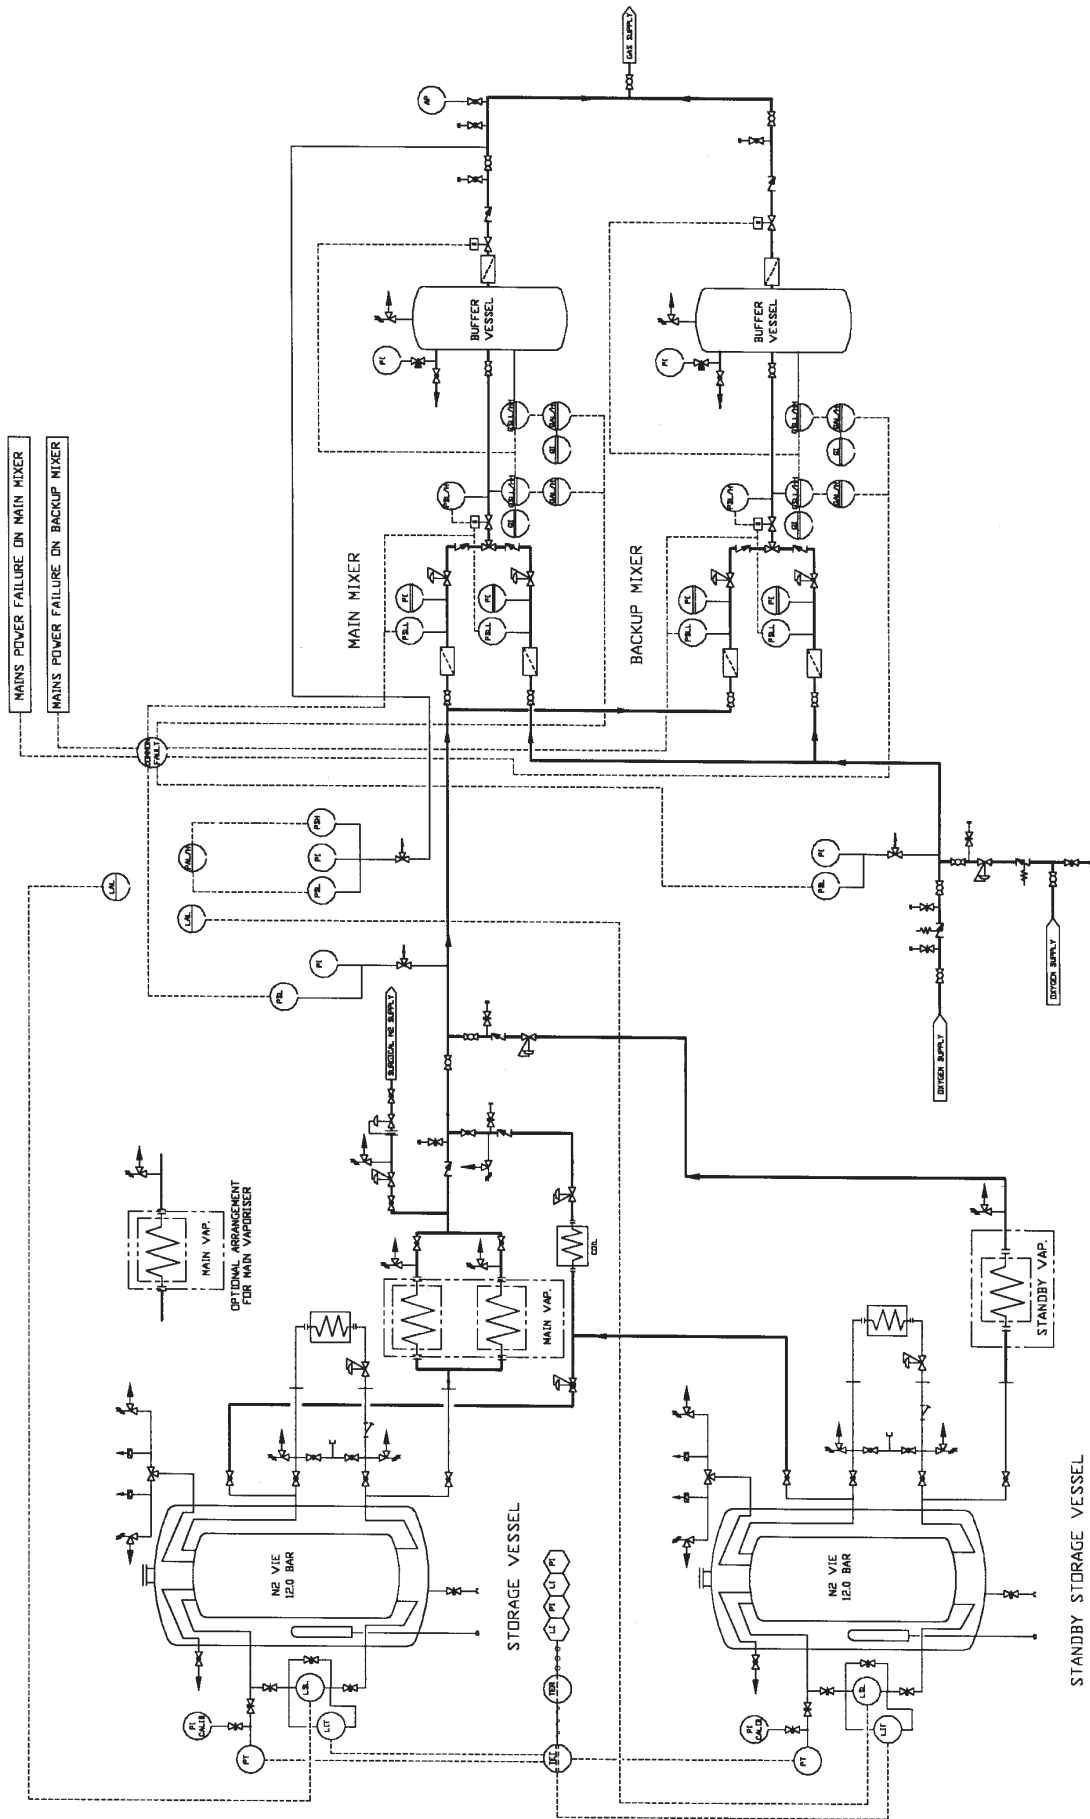

Figure 12 Typical synthetic air layout – nitrogen VIE supply with air mixing equipment (reproduced by kind permission of BOC)

## 7.0 System design – medical air

**7.90** For both the oxygen and nitrogen it is necessary to have a back-up system. Since it is essential to ensure continuity of supply, the system demands are such that this back-up should be derived from a second, smaller VIE.

**7.91** This second back-up VIE can also provide the back-up to the medical oxygen system, thus providing a more realistic back-up facility than the cylinder manifolds currently installed.

**7.92** Since four VIEs will be required (although two of them will be relatively small), there will of necessity be space requirements to be considered when planning the installation of a synthetic air system.

**7.93** The system comprises:

- a. storage vessels – one main vessel and one back-up vessel for both oxygen and nitrogen;
- b. vaporizers for both oxygen and nitrogen ;
- c. medical oxygen flow control – where used to supply medical oxygen systems;
- d. surgical nitrogen flow control – where required;
- e. control panel for the nitrogen and oxygen supplies to the mixing panels;
- f. duplicate air mixing panels;
- g. buffer vessels – each mixer has a buffer vessel to smooth fluctuations in demand;
- h. warning and alarm system;
- j. duplicate oxygen analysers on each mixer.

**7.94** The system is shown in Figures 11 and 12, which are provided courtesy of BOC and are copyright.

### Storage vessels

#### *Vessel summary*

**7.95** The following vessels are required:

- a. one main oxygen vessel;
- b. one standby oxygen vessel with 24 hours' capacity;
- c. one main nitrogen vessel;
- d. one standby nitrogen vessel with 24 hours' capacity.

#### *Vessel operating pressure*

**7.96** The following operating pressures are required:

- a. main vessels                      12.5 bar g;
- b. back-up vessels                 12.5–14 bar g.

*Main vessel capacity*

**7.97** The main vessel should normally be sized on the basis of 2 weeks' supply. This should be calculated as 14 x the average daily usage. This should provide adequate storage and a cost-effective vessel filling regime. The gas supplier should, however, be consulted as there may be other factors, such as geographical location, space etc, which need to be taken into account when sizing the main vessels.

*Back-up vessel capacity*

**7.98** The standby vessel should have 24 hours' capacity at any time, that is, it should be sized on the basis of twice the average daily usage. This will ensure that there is always 24 hours' supply available.

**7.99** In addition to the normal instrumentation as set out in the "Liquid oxygen supplies" section of Chapter 6, the vessels should be fitted with a telemetry system to continuously monitor the vessel contents.

**7.100** This information should be transmitted direct to the gas supplier and also the hospital. The exact details of how much information, and where it should be received, will depend on each hospital site.

**7.101** The main vessel low level alarm is activated at 25% full; the back-up low level alarm is activated at 50% full.

**7.102** The safety relief valves and bursting discs should be sized in accordance with the BCGA Code of Practice.

**7.103** The liquid from the vessels should be supplied to the process at a nominal pressure of 12.5 bar g.

**Vaporisation**

**7.104** The main and standby vessels should have dedicated vaporisers designed for continuous capacity and 24 hour capacity respectively at 1.5 x the required flows to ensure that the vaporisers are not overdrawn.

**7.105** This may be achieved in each case by either a single set of vaporisers, or by vaporisers operated on timed or manual changeover.

**7.106** It is preferable for the vaporisers to operate on a timed changeover as this minimises the maintenance actions which the hospital are required to carry out.

**7.107** The timed changeover will require a 110V or 240V supply; this should be on the emergency supply and an uninterruptible power supply should also be provided with at least 4 hours' capacity.

**7.108** Each isolatable vaporiser or set of vaporisers must have a safety relief valve.

**Medical oxygen flow control**

**7.109** A control panel (similar in principle to a C11 panel) should be provided – the only difference is that the standby supply is from a low-pressure liquid source, instead of high-pressure cylinders.

### **Surgical nitrogen flow control**

**7.110** A control panel to regulate the gaseous nitrogen to between 7.5 and 9.5 bar g, depending on the system design, should be provided.

**7.111** The pipeline distribution system should be designed in exactly the same way as for surgical air 700 kPa systems, as described in Chapter 8.

### **Control panel for the nitrogen and oxygen supplies to the mixing panels**

**7.112** The control panel should be sized in order to provide pressure regulated flows as appropriate for the mixing system; this would typically be up to 200 Nm<sup>3</sup>/hr.

**7.113** The standby supply regulation cuts in when the main line pressure falls to 11 bar g; there is no regulation on the main supply line.

**7.114** A non-return valve should be installed in both the nitrogen and oxygen supply lines within the mixer to prevent cross contamination.

**7.115** A non-return valve should also be installed on both the main oxygen supply and the standby oxygen supply to the mixer to prevent the medical oxygen line becoming contaminated with nitrogen.

### **Air mixing panels**

**7.116** A range of sizes of mixing panels are available with, typically, nominal capacities of 50, 100 and 200 Nm<sup>3</sup>/hr.

**7.117** A regulated supply of nitrogen and oxygen is mixed in a mixing valve. The differential pressure at the inlet to the mixing panel is critical and should not exceed 0.5 bar g. A pressure switch operated solenoid valve opens and shuts on a 0.5 bar g differential.

**7.118** The main mixer solenoid valve opens when the line pressure falls to 4.2 bar g; the standby mixer solenoid valve will open if the line pressure continues to fall to 4.0 bar g.

**7.119** Two independent paramagnetic oxygen analysers are provided on each mixer to give continuous on-line measurements.

**7.120** If the oxygen concentration falls outside 20–22% as measured by either analyser, the mixer solenoid valve is held closed and the mixer is shut down. In addition, a signal is relayed downstream to close the solenoid valve on the buffer vessel associated with that mixer.

### **Buffer vessels**

**7.121** Each mixer has associated with it a buffer vessel to smooth fluctuations in demand.

**7.122** In the event that the oxygen concentration is outside the specification, that is, 20–22%, the solenoid valve downstream of the buffer vessel will also close, preventing air from the buffer vessel from entering the distribution system.



**7.123** The buffer vessel, together with appropriate safety relief, should be sized to match each mixing panel to provide stable operation.

#### Alarm signal status unit

**7.124** The same alarm conditions for liquid oxygen should also be transmitted and displayed for the liquid nitrogen system. The following conditions should be displayed for the mixing panels:

| Indication                  | Legend                                             |
|-----------------------------|----------------------------------------------------|
| a. green "normal"           | normal                                             |
| b. yellow "plant fault"     | low gas pressure to any mixer                      |
| c. yellow "plant emergency" | analysis out of specification on any mixer         |
| d. yellow "reserve low"     | operating on final mixing panel/buffer vessel only |
| e. red "pressure fault"     | pressure fault.                                    |

**7.125** Conditions (b) to (e) should be transmitted to the central alarm system. Where relays are used, they should be normally energised relays which de-energise under fault conditions, with contacts having a minimum rating of 50 V dc, 50 mA.

**7.126** Alternatively, volt-free, normally closed contacts rated at 50 V dc, 50 mA should be provided for transmission of conditions (b) to (e) to the alarm system

**7.127** The panel can be incorporated into the mixing panel control unit, or be a separate unit within the plantroom. If mounted separately, the cabling should be monitored for open/short circuit. In the event of such a cabling fault, a red "system fault" lamp should be illuminated on the alarm signal status unit, together with the appropriate alarm condition.

#### Emergency supply facility

**7.128** This may be appropriate on some sites. A risk assessment should be carried out to establish the vulnerability of the main supply system of both oxygen and nitrogen.

**7.129** An emergency supply facility may be either:

- a. a medical air compressed gas manifold located away from the main supply within the hospital;
- b. portable emergency manifolds on trolleys.

## 8.0 System design – surgical air 700 kPa

### General

**8.1** Surgical air at 700 kPa is only used as the power source for surgical tools. These tools typically require high flows – up to 350 l/min – at 700 kPa at the point of use. Where nitrogen is available on site, it may be used as an alternative source of supply.

**8.2** Supply systems for surgical compressed air may be a cylinder manifold system, a dedicated 700 kPa compressor system or a compressor system capable of supplying both the 700 kPa and the 400 kPa supplies. In practice, the decision about which compressor system to install needs careful consideration due to the flow rates required and total usage.

**8.3** Cylinder manifold systems would normally be the most appropriate supply system; a compressor system would only be required for large theatre complexes specialising in orthopaedic and/or neurosurgery, and thus necessitating a high use of pneumatically powered surgical tools.

**8.4** It is possible to use nitrogen instead of air as the power source for surgical tools. This may be derived from either a liquid source or cylinders. In either case, the terminal units will need to be different from the existing medical air 700 kPa terminal units. A non-interchangeable screw thread (NIST) connector is already specified for nitrogen and should be used.

**8.5** The pressure control unit should comprise a regulating valve with upstream and downstream pressure gauges.

**8.6** Whatever supply system is installed, the overall system should be designed to provide a minimum of 700 kPa at the front of each terminal unit at a flow of 350 l/min.

**8.7** The maximum pressure under “no flow” or “low flow” conditions should not exceed 9 bar g.

**8.8** Cylinders of medical air should always be available for use in an emergency.

### Cylinder manifold supply systems

**8.9** These should generally be based on the systems described for medical air cylinder manifold systems in Chapter 5, except that the emergency/reserve supply will not normally be required and the alarm system will be much simpler.

**8.10** The alarm conditions should be transmitted to the central alarm system to alert porters and other staff of the need to change cylinders.

## Compressor supply systems

**8.11** These should generally be based on the requirements for medical air 400 kPa systems given in Chapter 7, and the quality of the delivered surgical air should be the same as medical air, as specified in paragraph 2.10.

**8.12** It is not necessary to provide duplex systems, since surgical air is not used for life support systems. It may, however, be considered appropriate to provide a simple standby manifold for larger installations. To avoid confusion with the emergency/reserve cylinders supplies for 400 kPa systems, the surgical air standby system for 700 kPa systems, where provided, is referred to as a back-up system.

## Operating and alarm system – cylinder manifold supply system

### Manifold monitoring and indicator system

**8.13** The monitoring and indicator system should perform the following functions:

- a. overall manifold monitoring;
- b. manifold condition indication;
- c. overall supply plant indication.

All functions should be appropriately identified.

### Manifold monitoring

**8.14** The manifold should be monitored to detect the following:

- a. duty bank operating;
- b. duty bank empty and standby operating;
- c. standby bank below 10% capacity when duty bank is empty.

### Manifold indicator unit

**8.15** There should be indicators to show the following conditions:

- a. a green “running” indicator;
- b. a yellow “empty” indicator for each bank when the running bank is empty and the reserve is in use;
- c. a yellow “low pressure” indicator for each bank when changeover has occurred and the pre-set low pressure has been reached.

*Conditions (b) and (c) are the same*

### Alarm signal status unit

8.16 The following indication of manifold conditions should be provided:

| Indication                                               | Legend                       |
|----------------------------------------------------------|------------------------------|
| a. a green "normal"                                      | normal                       |
| b. a yellow "duty bank empty, standby running" condition | change cylinders             |
| c. a yellow "duty bank empty, standby low" condition     | change cylinders immediately |
| d. a red "pipeline pressure fault" indicator             | pressure fault               |

8.17 Conditions (b) to (d) should be transmitted to the central alarm system. Where relays are used, they should be normally energised relays which de-energise under fault conditions, with contacts having a minimum rating of 50 V dc, 50 mA.

8.18 Alternatively, volt-free, normally closed contacts rated at 50 V dc, 50 mA should be provided for transmission of conditions (b) to (e) to the alarm system.

8.19 The panel can be incorporated into the manifold indicator unit or be a separate unit within the plantroom. If mounted separately, the cabling should be monitored for open/short circuit. In the event of such a cabling fault, a red "system fault" lamp should be illuminated on the alarm signal status unit, together with the appropriate alarm condition.

### Compressor supply system

8.20 The compressor operating system should be based on the recommendations for 400 kPa compressor systems, except that simplex plant operation only would be required.

### Plant status monitoring

8.21 A monitoring system should be provided to detect the following faults in the air compressor system:

- a. plant faults for each compressor:
  - (i) control circuit failed;
  - (ii) motor tripped;
  - (iii) after-cooler temperature high;
  - (iv) compressor temperature high;
  - (v) compressor failed to go on load;
  - (vi) activation of other safety devices supplied by the manufacturers;
- b. plant faults for each dryer unit:
  - (i) dryness failure (dewpoint meter  $> -26^{\circ}\text{C}$ );
  - (ii) pressure fault;
- c. plant emergency:
  - (i) receiver pressure 0.5 bar g below the standby cut-in pressure;

- (ii) receiver pressure 0.5 bar g above cut-out pressure ;
- (iii) dryness above 0.51 mg/l (dewpoint at –26°C at atmospheric pressure);
- d. pressure fault (cylinder reserve):
  - (i) pressure in duty bank below 50% (of normal cylinder pressure);
- e. pressure fault (pipeline):
  - (i) low pipeline pressure;
  - (ii) high pipeline pressure.

#### Plant status indicator unit

**8.22** In addition to the plant control indication, there should be a plant status indicator panel which may be mounted on the plantroom wall or adjacent to either the compressor starter unit or the plant control unit. It should have a warning notice which complies with BS 5378 to indicate the presence of low voltage.

**8.23** There should be indicators for each compressor to show the following conditions:

- a. green “ mains supply on” ;
- b. yellow “ control circuit failed” ;
- c. yellow “ overload tripped” ;
- d. yellow “ after-cooler temperature high” ;
- e. yellow “ compressor temperature high” ;
- f. yellow for each individual safety device provided by the manufacturers;
- g. yellow “ compressor failure” .

**8.24** There should be indicators for each dryer system to show the following:

- a. green “ mains supply on” ;
- b. yellow “ dryness fault” ;
- c. yellow “ pressure fault” .

#### Alarm signal status unit

**8.25** An alarm signal status unit should be provided as part of the control system. It should display the following conditions:

| Indication                        | Legend                                                                  |
|-----------------------------------|-------------------------------------------------------------------------|
| a. green “ normal”                | normal                                                                  |
| b. yellow “ plant fault”          | conditions (b–g), see 8.23;<br>(c), see 8.24                            |
| c. yellow “ plant emergency”      | low reservoir<br>pressure; high moisture,<br>ie condition (b), see 8.24 |
| d. red “ pipeline pressure fault” | pressure fault.                                                         |

**8.26** Conditions (b) to (d) should be transmitted to the central alarm system. Where relays are used, they should be normally energised relays which de-energise under fault conditions, with contacts having a minimum rating of 50 V dc, 50 mA.

**8.27** Alternatively, volt-free, normally closed contacts rated at 50 V dc, 50 mA should be provided for transmission of conditions (b) to (d) to the alarm system.

**8.28** The panel can be incorporated into the plant status indicator unit or be a separate unit within the plantroom. If mounted separately, the cabling should be monitored for open/short circuit. In the event of such a cabling fault, a red "system fault" lamp should be illuminated on the alarm signal status unit, together with the appropriate alarm condition.

**8.29** The alarm signal status unit should be supplied from all individual plant control units, or from a separate common supply.

## Plant management

**8.30** Connections should be provided which allow monitoring, but not control, of plant alarm conditions (b) to (e) and pump running for each "compressor". These connections should be volt-free contacts normally closed for each condition having a minimum rating of 50 V dc, 50 mA. The building management system should not be used to control the plant.

## Operating considerations

**8.31** Plant should be operated in accordance with the manufacturer's instructions and covered by a sound, effective, planned preventative maintenance (PPM) policy.

## Simplex plant

**8.32** The same philosophy should be applied to simplex plant as for medical air compressor plant, except that no standby compressor, dryer system or emergency/reserve manifold or cylinders will be required.

## 9.0 System design – medical vacuum supplies

### General

- 9.1** The medical vacuum pipeline system provides immediate and reliable suction for medical needs, particularly in operating theatres.
- 9.2** The medical vacuum pipeline system consists of the vacuum supply system, the distribution pipework and terminal units. The performance of the pipeline system is dependent on the correct specification and installation of its component parts. This section describes the requirements of the vacuum supply system.
- 9.3** The medical vacuum pipeline system should be designed to maintain a vacuum of at least 300 mm Hg (40 kPa) at each terminal unit during the system design flow tests; see Appendix G.
- 9.4** To ensure continuity of supply, the vacuum plant should be connected to the essential electrical power supply.
- 9.5** The capacity of the vacuum supply system should be appropriate to the estimated demand. Observations of the capacity actually used (in terms of hours run by vacuum plant) in existing systems show clearly that the system design flow calculations for most hospitals have been in excess of actual demand. An appropriate reduction in capacity may be undertaken in an existing hospital by installing a vacuum supply system based on the design criteria in Chapter 4 when replacement is due. This could lead to considerable savings in capital investment and the release of plantroom floor space.
- 9.6** With the exception of the vacuum discharge to atmosphere, the pipeline distribution system for vacuum has traditionally been constructed of copper. PVC pipework can be considered where cost-effective. Pressure testing of PVC pipework should be carried out at 100 kPa.
- 9.7** The major components of a medical vacuum system and their layout are shown in Figure 13. A suitable operating and indicating system with alarms is also required. Appropriate layout and adequate siting of these components should be provided. Packaged supply systems are available from manufacturers which should be specified to meet the requirements given in this memorandum.
- 9.8** The plant should consist of at least two identical pumps, a vacuum reservoir with by-pass facilities, two duplex bacteria filters with drainage traps, appropriate non-return valves, isolating valves, gauges and pressure switches, an operating and indicating system, an exhaust system and a test point.

### Siting

- 9.9** The plant should have all round access for maintenance purposes and allowances should be made for changing major components.
- 9.10** The siting of the plant should allow for adequate flows of air to cool the pumps. The manufacturers should be consulted over the range of

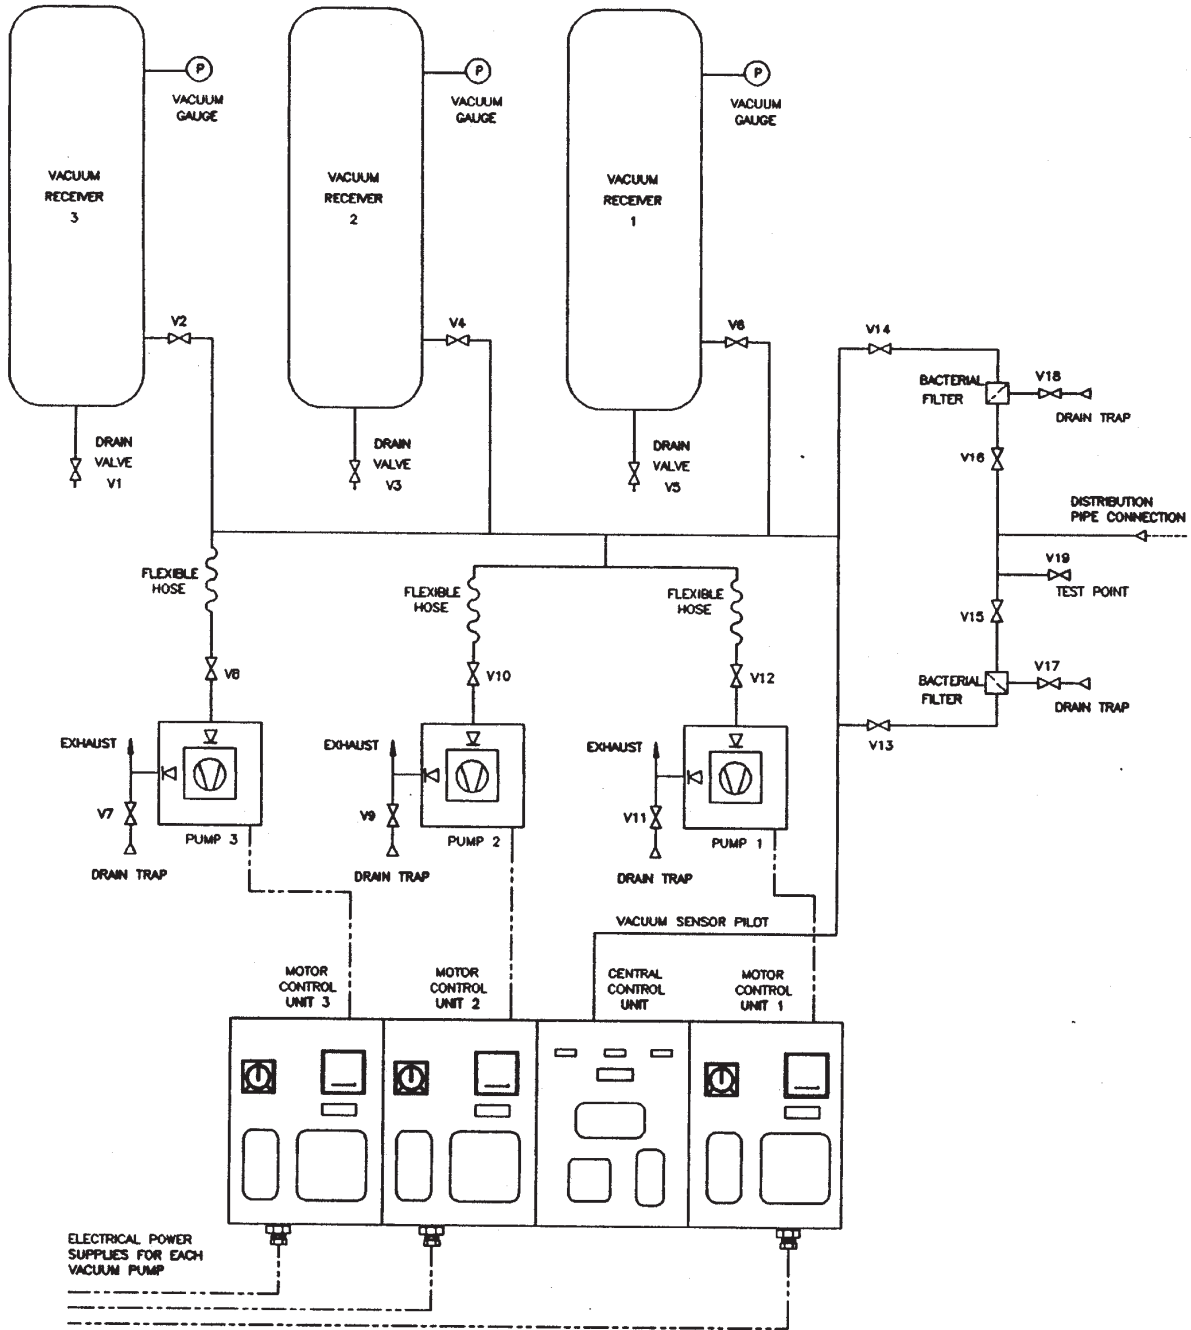

Figure 13 Schematic diagram of a typical medical vacuum system (reproduced by kind permission of MEDÆS)



operating temperature for which the supply system is designed. In extreme cases, refrigerator cooling may be required.

### Pump noise

**9.11** The noise level produced by the pumps will increase with the capacity of the supply system. For larger systems this can result in an unacceptable noise level at the pump. The maximum free field noise level at 1 m from the unsilenced pump should not exceed the following values for individual pumps:

| Power     | Noise Level |
|-----------|-------------|
| 5 kw      | 75 dBA      |
| 5.1–15 kW | 82 dBA      |
| 15 kW     | 89 dBA.     |

**9.12** A suitable acoustic enclosure may be required in the purchase specification for all pumps with a free field noise level at 1 m of 80 dBA or over. An enclosure should produce a reduction of at least 10 dBA in the free field noise level at 1 m.

### Vacuum plant exhaust

**9.13** The position of the termination point should be carefully chosen to be clear of windows, ventilation intakes and the intake of air compressors and other equipment, since for oil-lubricated pumps the vacuum exhaust is likely to be polluted with oil fumes.

**9.14** Noise from the exhaust should be considered and a silencer fitted.

**9.15** The construction should conform to the following criteria:

- the exhaust should be sized to give a back pressure at system design flow which is matched to the pump performance;
- the termination point should be provided with protection, to reduce the effect of wind pressure and prevent the ingress of rain, snow, insects or animals;
- weatherproof notices should be fixed at the discharge point(s) with the legend "medical vacuum discharge point – do not obstruct";
- the exhaust pipe should be provided with a drainage valve at its lowest point;
- a silencer should be fitted on the exhaust pipe from each pump. This may be integral with the pump unit.

### Efficiency

**9.16** The efficiency of the plant should be measured at 100% and 10% of system design flow. The efficiency should not be less than 200 l/min of free air aspirated, corrected to STP per kilowatt of electricity used when the pump is equilibrated at normal operating temperature and whilst maintaining pressure of 450 mm Hg (60 kPa). The pump should be capable of producing a higher vacuum than that required in the pipeline, so that the resistance of the bacteria filter and back pressure in the exhaust system can be overcome. For this purpose the pump should be capable of providing a vacuum of not less than 650 mm Hg (87 kPa).

**9.17** The capacity of the vacuum pump should be specified in terms of the free air aspirated (FAA) in l/min when the pump is operating at a vacuum of 475 mm Hg (63 kPa) and at 450 mm Hg (60 kPa) at the plant pipeline connection. The performance of any pump is a curve which varies between a negligible FAA at the maximum vacuum, and maximum FAA at the atmospheric pressure, so that the capacity of any pump depends on the vacuum at which it is operating. If a single FAA capacity value is quoted for a vacuum pump, it has no meaning unless it is referred to a single vacuum setting. A pump should be chosen which has a good performance curve in the range 500–650 mm Hg (67–87 kPa).

### **Vacuum pumps**

**9.18** Vacuum pumps for medical vacuum plants are selected by plant manufacturers from the range of units currently available for industrial use. New designs of vacuum pumps continue to appear on the market. Any type of pump may be used provided it meets the requirements of performance, efficiency and reliability which are given here.

**9.19** Water-sealed pumps should not be used.

**9.20** Rotary vane pumps are available from several manufacturers and have replaced reciprocating vacuum pumps which are now obsolete. Many different models are available, with performance characteristics which are optimised for different uses. Vacuum pumps for MGPS should be chosen for reliability under stop/start use.

**9.21** Pumps should normally be oil-lubricated. Vapours from the lubricating oil are unlikely to be a significant component of the exhaust gases if correctly maintained. “Dry running” rotary vane pumps are available at increased capital cost and with lower efficiency than oil lubricated pumps of comparable performance.

**9.22** At least two pumps should be provided. The actual number is at the discretion of the plant manufacturer to ensure optimum cost benefit of the system. In all cases, the total capacity must be at 75% of the system design flow with one pump not running. All pumps should be designed for continuous operation.

**9.23** All systems should comprise pumps and motors of identical type which are suitable for continuous running and stop/start operation.

**9.24** Pump motors should comply with the National Health Service Model Engineering Specification C51 with the addition of Class F insulation and Class B temperature rise.

**9.25** A vacuum reservoir should be provided so that the duty pump does not run continuously for low loads. The reservoir should be manufactured in accordance with BS 5169 for class III, with test certificates provided to the user. The minimum test pressure should be 4 bar g.

**9.26** The water capacity of the reservoir should be equal to the plant design flow at 450 mm Hg (60 kPa), in terms of free air aspirated in 1 minute with the pump operating at 450 mm Hg (60 kPa).

**9.27** Provision should be made for draining the reservoir under vacuum conditions. By-pass facilities should be provided so that the reservoir can be drained and inspected without interruption to the vacuum supply. The reservoir should be fitted with suitable lifting lugs and feet.

- 9.28** If multiple reservoirs are provided, they should be arranged in parallel.
- 9.29** The bacteria filters and drainage trap should comprise two identical sub-assemblies with manually operated isolating valves, arranged to allow either sub-assembly to be on stream. Each sub-assembly should contain a bacteria filter rated at the plant capacity.
- 9.30** The bacteria filter should be marked with the legend “**bio-hazard**”, together with a description of a safe procedure for changing and disposing of the filters and emptying the drainage trap.
- 9.31** The bacteria filters should have a filter efficiency, when tested by the sodium flame test in accordance with BS 3928:1969, of less than 0.005% at the system design flow.
- 9.32** The pressure drop across a clean filter at the system design flow should not exceed 25 mm Hg (3 kPa) at a vacuum of 475 mm Hg (63 kPa).
- 9.33** The drainage trap may be integral with the bacteria filter and should be fitted with a transparent sterilizable bowl to collect liquid.
- 9.34** Microbial contamination – whereas there is no firm evidence which has demonstrated the need for bacteria filters, it is recommended that such devices are included as precautionary measures.

*Precautions for changing filters are included in the ‘Operational management’ volume of this HTM*

#### **Pressure control**

- 9.35** The cut-in setting for the vacuum pumps should be adjusted to allow for the pressure drop across the pipeline distribution system and the bacteria filters. The cut in may be expected at about 500 mm Hg (67 kPa).
- 9.36** The cut-out setting should be at an appropriate point on the performance curve of the pump, which minimises stop/start operation but is at a vacuum which is economically attained by the pump. This cut-out setting may be expected at about 650 mm Hg (87 kPa).

#### **Valves**

- 9.37** Non-return valves should be fitted, when necessary, at the inlet and outlet of each pump to prevent backflow when a common discharge pipe is used. (Some vacuum pumps include integral non-return valves.)
- 9.38** Manually operated valves should be arranged in the positions shown in Figure 13, to allow isolation of components such as pumps, reservoirs, by-pass pipework, drainage taps and bacteria filters.

#### **Pressure regulation of vacuum system**

- 9.39** A vacuum of 300 mm Hg is required at the connection point of each terminal unit with a flow of 40 l/min whilst the system is operating at system design flow.
- 9.40** Procedures for these tests are given in Chapter 15.
- 9.41** A pressure drop of 100 mm Hg (13 kPa) is allowed across the terminal unit at a flow of 40 l/min (BS 5682:1984). A further pressure drop of 50 mm Hg (7 kPa) is allowed in the distribution pipework, giving a total

pressure drop of 150 mm Hg (20 kPa) between the terminal unit connection point and the plant test point, which should be 450 mm Hg (60 kPa).

### Vacuum indicators

**9.42** Vacuum indicators should comply with BS 1780:1985 or have an equivalent performance if electronic indicators are used. Calibration should be 0–760 mm Hg (0–101 kPa). All gauges should be a minimum scale length of 90 mm.

**9.43** Vacuum indicators should be located on:

- a. the plant control unit indicating the vacuum in the pipeline (ie on the pipeline side of the bacteria filter);
- b. each reservoir.

A differential vacuum indicator should be located across the bacteria filter. All indicators should be connected directly to the pipework and not isolated by valves.

### Electrical supply

**9.44** The electrical supply to the medical vacuum plant should be connected to the essential electrical supply. A time-delay system should be provided to avoid overloading the power supply on changeover.

### Pump operating and indicating system

#### *General description*

**9.45** The operating and indicating system should perform the following functions:

- a. overall plant control and indication;
- b. individual pump starting;
- c. plant status monitoring and indication;
- d. alarm signal status unit.

**9.46** Provided that the individual pump starters are housed in a separate compartment, the operating and indicating system may be housed in separate units or may be installed in a common panel and located on the plant or on the plantroom wall.

**9.47** Pneumatic components should have ventilation. All functions should be appropriately identified. Indicators should have a design life of at least one year. The operating system should be capable of automatically restarting after reinstatement of the power supply.

**9.48** The vacuum supply system should be connected to the standby electrical system. The control system should ensure that pumps restart in sequence to avoid overloading the essential power supply.

#### *Plant control unit*

**9.49** The control unit should have a separate power supply for each pump controlled by a separate sub-circuit. It should be manufactured and installed in

accordance with IEE regulations, and the design should be such that no single component failure in the control unit will result in loss of plant output.

**9.50** The unit should allow either manual selection of duty/standby for each of the pumps or have an automatic sequence selection with a means for manual override. The control unit should ensure that two or more pumps do not start simultaneously when power is applied.

**9.51** A warning notice which complies with BS 5378: Part 3: 1982 should be affixed which indicates the presence of low voltage.

**9.52** For testing purposes, each pump should have a selector switch which when turned to the "on" position allows the pump to run continuously.

#### *Plant control indication*

**9.53** There should be indicators for each compressor as follows:

- a. green "mains supply on" ;
- b. green "pump operating" which indicates that the pump motor is electrically energised;
- c. green "pump operating" which indicates that the pump is drawing vacuum;
- d. an indicator of the vacuum produced in the pipeline.

#### *Pump starter units*

**9.54** There should be individual starter units, each one operating a single designated pump. The starters should be provided with safety interlocks as specified by the pump manufacturers, which should inhibit plant operation until manually reset by means of a button. The starters should allow automatic restart after an interruption to the power supply. Each starter unit should contain the following:

- a. an isolator interlocked with the covers;
- b. either HRC fuses to BS 88 or suitable circuit breakers to BS EN 60947-2 and/or BS EN 60898;
- c. starter;
- d. an industrial grade ammeter to BS 89;
- e. a total hours counter, if not included in the plant control unit;
- f. a green "mains supply on" indicator, if mounted separately from the plant control unit.

#### *Plant status monitoring*

**9.55** A monitoring system must be provided to detect the following faults in the vacuum supply system:

- a. plant faults for each pump:
  - (i) control circuit failed;
  - (ii) motor tripped;
  - (iii) pump failed to go on load;
  - (iv) activation of other safety devices supplied by the manufacturers;

## 9.0 System design – medical vacuum supplies

- b. plant emergency – receiver vacuum has fallen, for example, by 50 mm Hg below the cut-in setting for the pump;
- c. pressure fault (pipeline) – pipeline vacuum less than 360 mm Hg.

### *Plant status indicator unit*

**9.56** In addition to the plant control indication there should be a plant status indicator panel which may be mounted on the plantroom wall or adjacent to either the pump starter unit or the plant control unit. It should have a warning notice which complies with BS 5378: Part 3: 1982 to indicate the presence of low voltage.

**9.57** There should be indicators for each pump to show the following conditions:

- a. green “ mains supply on” ;
- b. yellow “ control circuit failed” ;
- c. yellow “ motor tripped” ;
- d. yellow for each individual safety device provided by the manufacturers;
- e. yellow “ pump failure” .

### *Alarm signal status unit*

**9.58** The following indication of plant conditions should be provided:

| Indication                        | Legend                     |
|-----------------------------------|----------------------------|
| a. green “ normal” indicator      | normal                     |
| b. yellow “ plant fault”          | conditions (b–d), see 9.57 |
| c. yellow “ plant emergency”      | condition (e), see 9.57    |
| d. red “ pipeline vacuum fault”   | plant failure              |
| e. red “ pipeline pressure fault” | pressure fault             |

**9.59** Conditions (b) to (e) should be transmitted to the central alarm system. Where relays are used, they should be normally energised relays which de-energise under fault conditions, with contacts having a minimum rating of 50 V dc, 50 mA.

**9.60** Alternatively, volt-free, normally closed contacts rated at 50 V dc, 50 mA should be provided for transmission of conditions (b) to (e) to the alarm system.

**9.61** The panel can be incorporated into the plant status indicator unit, or be a separate unit within a plantroom. If mounted separately, the cabling should be monitored for open/short circuit. In the event of such a cabling fault, a red “ system fault” lamp should be illuminated on the alarm system status unit, together with the appropriate alarm condition.

## **Plant management**

**9.62** Connections should be provided which allow monitoring (but not control) of plant alarm conditions (b) to (e) and pump running for each vacuum pump. These connections should be volt-free contacts normally closed for each condition having a minimum rating of 50 V dc, 50 mA.

**9.63** Plant should be operated in accordance with the manufacturer's instructions and be covered by a sound, effective planned preventative maintenance (PPM) policy.

# 10.0 System design – anaesthetic gas scavenging systems

## General

**10.1** Anaesthetic gases are considered to be substances hazardous to health for the purposes of the Control of Substances Hazardous to Health Regulations 1988 (COSHH), except where they are administered to a patient in the course of medical treatment.

**10.2** Detailed guidance on compliance with COSHH is given in EL(96)33 and enclosure: 'Advice on the Implementation of the Health & Safety Commission's Occupational Exposure Standards for Anaesthetic Agents', published by the Department of Health 1996. Further guidance is given in 'Anaesthetic agents: Controlling exposure under COSHH', prepared by the Health Services Advisory Committee, ISBN 0-7176-1043-8.

**10.3** The COSHH regulations set out very specific duties that apply to anaesthetic gases, and employers have a legal obligation to ensure that these duties are discharged. It is therefore the responsibility of the general manager or chief executive to implement the requirements of the COSHH regulations with respect to anaesthetic gases.

**10.4** The anaesthetic gases which are of primary concern are nitrous oxide and halogenated agents such as halothane, enflurane and isoflurane. These agents are usually administered in low concentrations compared to nitrous oxide, and therefore for practical purposes it is only necessary to consider the effects of nitrous oxide pollution.

**10.5** The COSHH regulations require that, for every exposure to substances hazardous to health, the following should be carried out:

- a. assessment of the risk;
- b. methods of achieving control of the risk;
- c. means of monitoring that the methods of control are maintained in an effective condition.

**10.6** Both publications listed in paragraph 10.2 give details of the management actions which will need to be carried out in order to comply with the requirements of the COSHH regulations, and are briefly covered in this chapter.

**10.7** Effective control of exposure to anaesthetic gases will involve a combination of the following measures:

- a. the use of an effective scavenging system to remove the pollution at source;
- b. good room ventilation to dilute pollution from leaks, patients' expired air etc;
- c. good housekeeping to minimise leakage arising from poorly fitted face masks, flowmeters inadvertently left on, poorly maintained anaesthetic or scavenging equipment etc.



**10.8** Control of the risk is achieved by a combination of good housekeeping, that is, minimising leaks, room ventilation and the removal of waste anaesthetic gases at source by a scavenging system.

**10.9** This section covers the specification, design and installation of anaesthetic gas scavenging systems (AGSS).

### Background

**10.10** The following anaesthetic gases and agents are typically used in general anaesthesia:

|                  |              |
|------------------|--------------|
| N <sub>2</sub> O | 6 litres/min |
| O <sub>2</sub>   | 4 litres/min |
| Halothane        | } 1–5%       |
| Isoflurane       |              |
| Enflurane        |              |

**10.11** The flammable anaesthetics such as ether and cyclopropane are no longer used. Cyclopropane is no longer manufactured. The AGSS is not usually designed for use with flammable anaesthetic agents. Refer to Health Guidance Note 'Static discharges'.

**10.12** To ensure that all devices, for example anaesthetic machines, ventilators and breathing systems, are suitable for the purpose, the guidance given in BS 5724 Part 1 and BS 5724 Parts 2.12 and 2.13 should be followed. (See also the 'Report of a working party to review the anti-static requirements for anaesthetising areas'.)

**10.13** Nitrous oxide and oxygen are usually supplied from the MGPS, but the halogenated anaesthetic agents are supplied from a vapouriser on the anaesthetic machine. Leakage and spillage can occur from the anaesthetic machine, for example when filling vaporisers, or if flowmeters are inadvertently left switched on.

**10.14** There are several different types of breathing circuit which can be used to administer the anaesthetic gases to the patient, depending on the procedure to be carried out. Nearly all breathing circuits, apart from paediatric circuits, incorporate an expiratory valve or port, in the case of a ventilator, to which a scavenging system can be connected.

**10.15** The major source of pollution when a general anaesthetic is administered is spillage from the expiratory valve or adjustable pressure limiting valve on the breathing system, or from the expiratory port of the ventilator. This valve needs to be replaced with a modified valve, to which a scavenging system can be connected. The characteristics of these valves may vary with orientation; there may be a further variation when a scavenging system is connected. The anaesthetist will need to be aware of this and adjust the valve as appropriate.

**10.16** Both the expiratory valve and the expiratory port of the ventilator should comply with the requirements of BS 6834:1987 (1992), so that a scavenging system can be connected.

**10.17** The expired gas flow depends on whether the patient is breathing spontaneously or whether a ventilator is being used, and if so, the type of

ventilator. Typically the expired gas flow can reach 130 l/min, although this will be for a short duration.

### Sources of pollution and provision of AGS systems

**10.18** Sources of pollution include the following:

- a. excess gas from the expiratory valve on the breathing system;
- b. discharge from the expiratory port of the ventilator, which may include the driving gas;
- c. expired air from the patient;
- d. leakage from equipment, poorly-fitted face mask etc;
- e. spillage from receiving system of the AGSS;
- f. diffusion through tubing (this is thought to be negligible);
- g. discharge from gas monitoring equipment (when used).

**10.19** An AGSS can remove only pollution which can be captured at source, that is, it can only remove pollution from the first two and the last sources. It cannot remove pollution from any other source. Local ventilation systems may remove pollution discharged into the environment, although the effectiveness of such systems is being investigated.

**10.20** In practice, this means that an AGSS can only be used to remove pollution from anaesthetic breathing systems incorporating an expiratory valve or port which complies with the requirements of BS 6834:1987 (1992) to which an AGSS can be connected.

**10.21** Therefore, AGSS should **only** be installed in areas where anaesthetic gases are administered as a general anaesthetic via a breathing system. Since nitrous oxide is almost always administered via a breathing system, an AGS terminal unit will be required in all areas where a nitrous oxide terminal unit is provided.

**10.22** Details of the level of provision for AGS terminal units are given in Table 2.

**10.23** In general, AGS terminal units should always be provided in areas where general anaesthetics are administered, such as operating and anaesthetic rooms. There may be other areas, such as X-ray and endoscopy departments, where general anaesthetics are also administered on a regular basis, and therefore consideration should be given to providing an AGS terminal unit in these areas. This is indicated in Table 2 as a project team option.

**10.24** The Ayres T-piece and Jackson-Rees open-ended reservoir bag are often used in paediatric anaesthesia. It may not be possible to use an AGSS with these types of paediatric breathing system. Specially designed local exhaust ventilation systems have not been shown to be effective, and therefore the requirement for good room ventilation is particularly important.

**10.25** Inhalation analgesia is used for pain relief and reduction of anxiety during childbirth, dentistry (where the practice is usually referred to as relative analgesia) and occasionally in physiotherapy, ITU and acute wards, using a mixture of nitrous oxide and oxygen.

**10.26** In midwifery, the analgesic is supplied as a mixture of 50% nitrous oxide/50% oxygen. In relative analgesia, the anaesthetist selects the composition of the gas by adjusting the mixing valve of the relative analgesia equipment. In both cases, administration is via a specially designed face mask, and the patient exhales directly into the environment. Considerable spillage of nitrous oxide can occur into the surrounding environment.

**10.27 It is not possible to use an AGSS when nitrous oxide is administered in this way as an analgesic.**

**10.28** For dentistry, local exhaust systems are currently being developed to remove the pollution from the vicinity of the dental chair where relative analgesia is used. These may be effective in reducing the resultant environmental pollution.

**10.29** In obstetrics, local exhaust ventilation systems, hoods and other extract systems have not been shown to be effective in removing the pollution in delivery areas where 50% nitrous oxide/50% oxygen is used as an analgesic. In this case, the pollution should be minimised by good room ventilation and good housekeeping techniques.

**10.30** In recovery areas, the major source of pollution is the patient's expired gases. Local exhaust systems or proximity devices have not been found to be effective because of the need for excessively high extract flows and close positioning of the device to the patient, which may interfere with effective nursing. In recovery areas, good room ventilation should be provided.

**10.31** Health Technical Memorandum 2025 'Ventilation in healthcare premises' gives further information.

## **AGSS design**

### *General*

**10.32** For new installations, an AGSS which complies with the requirements of BS 6834:1987 (1992) should be installed in all operating departments and other areas as required, in accordance with the level of provision set out in Table 2 and as discussed above.

**10.33** A typical system schematic is shown in Figure 14. This is taken from BS 6834:1992 and shows the terminology used. A diagram of a receiving system is shown in Figure 15.

**10.34** For existing installations which do not comply with BS 6834:1987 (1992), an assessment of the effectiveness of the system should be carried out in accordance with the 'Operational management' volume of this HTM. The assessment should also include tests to ensure that the criteria for patient safety, as specified in BS 6834:1987 (1992), can be achieved. If these criteria cannot be achieved, or if the system cannot be shown to be effective in terms of its ability to remove pollution, then consideration should be given to installing a system which complies with BS 6834:1987 (1992).

### *Active and passive systems*

**10.35** AGSS which comply with BS 6834:1992 are **active** systems, that is, the air flow from the disposal system is as a result of a powered device such as a fan or suction unit.

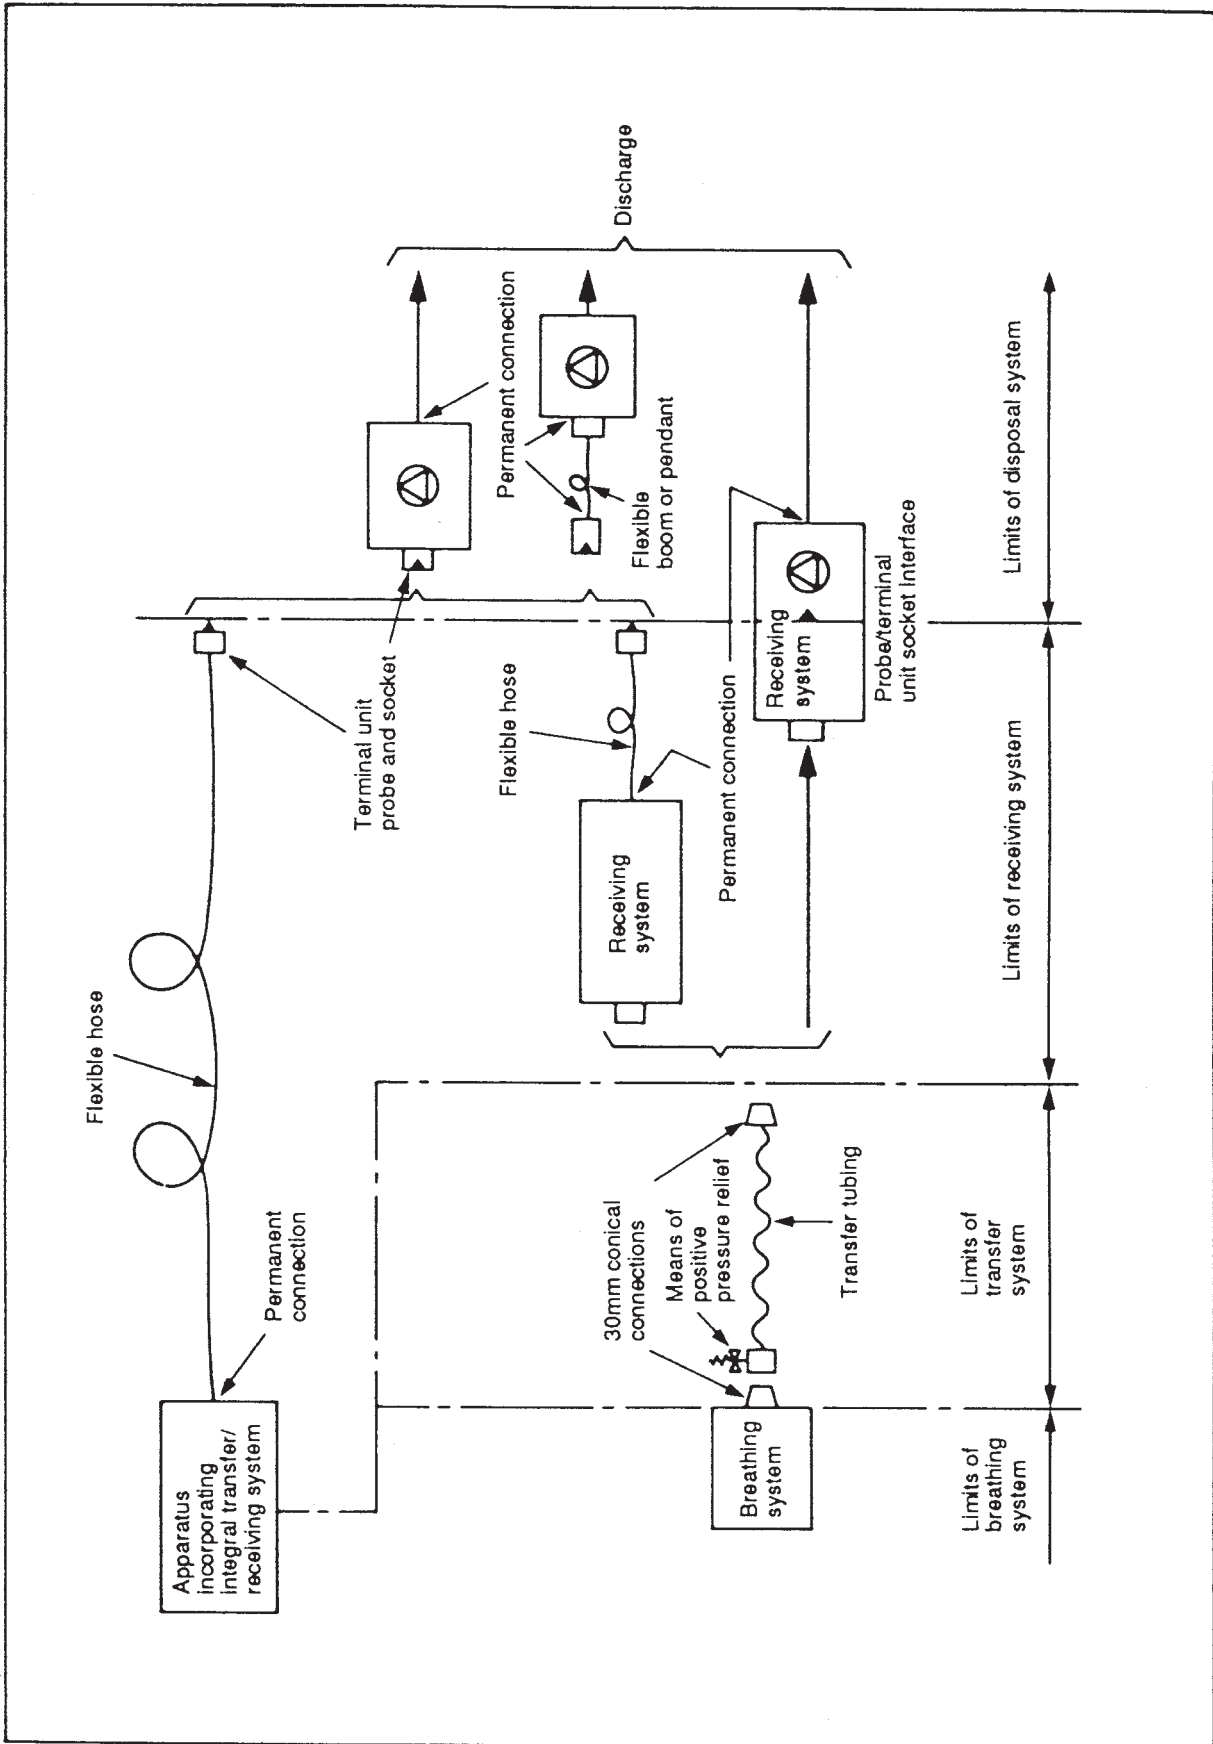

Figure 14 Schematic diagram of AGSS to BS 6834

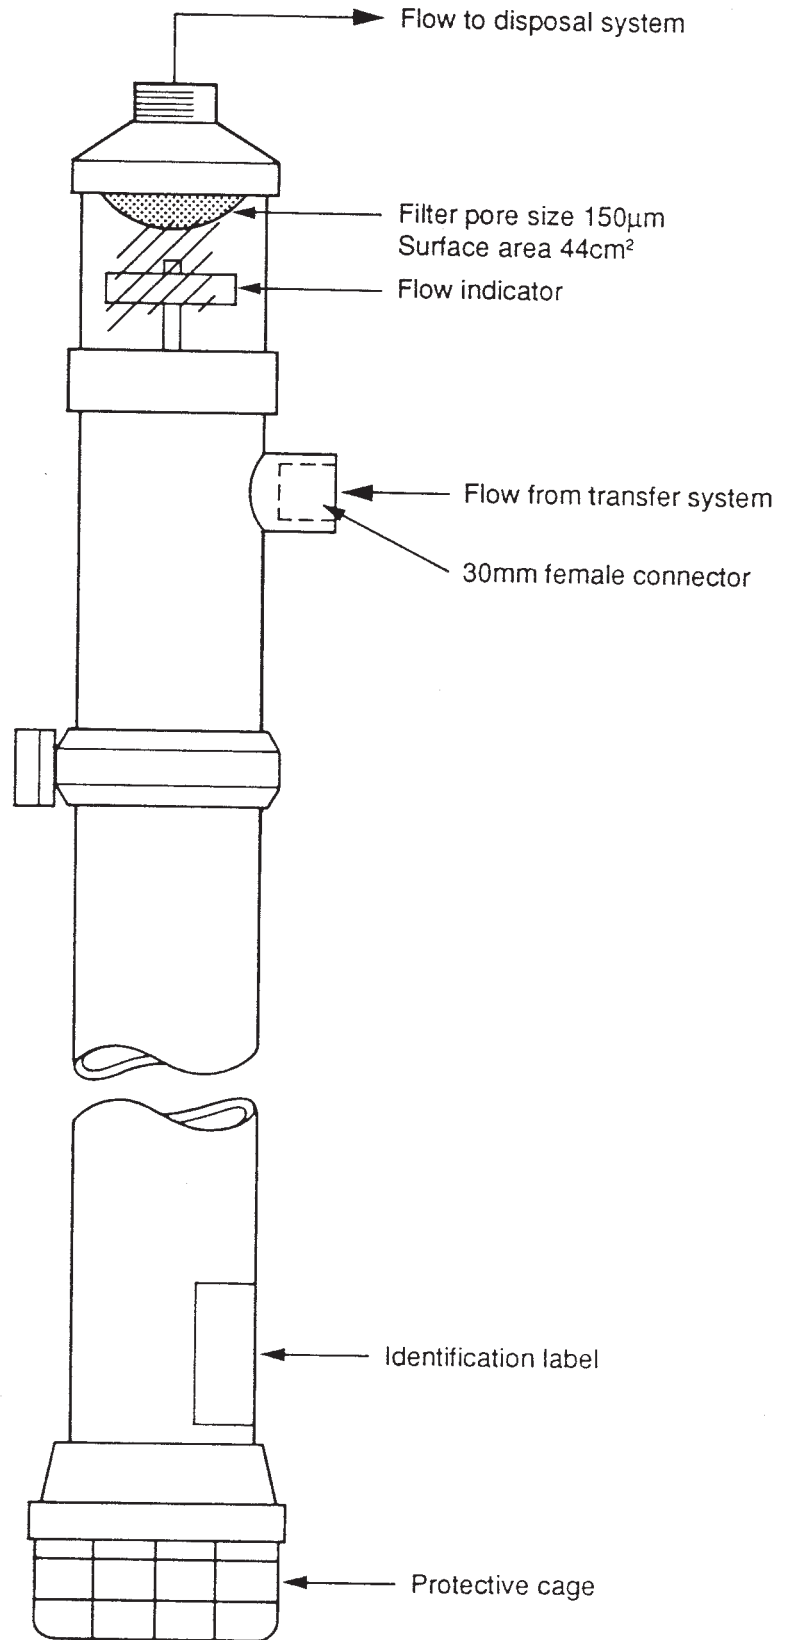

Figure 15 Schematic diagram of receiving system (reproduced by kind permission of MEC Ltd)

**10.36 Passive** systems are those in which the air flow from the disposal system does not result from a powered device. The patient provides the driving force to expel the gases.

**10.37** Passive systems are **not** recommended. This is because they cannot meet the specified safety requirements under all conditions due, for example, to variations in wind direction and pressure which may result in excessive suction pressure.

**10.38** Some AGSS have been installed in which the disposal system discharges into the mechanical ventilation system; such systems may be described as **semi-passive** or **assisted-passive** systems. The ventilation system provides the motive force to remove the pollution. These systems are **not** recommended because, like passive systems, their performance is not reliable and they cannot meet specified safety requirements under all conditions.

**10.39** Where passive and assisted-passive systems are installed, an assessment of their efficiency should be carried out as described in the 'Operational management' volume of this HTM. Consideration should be given to replacing these systems with an AGSS which complies with BS 6834:1992.

### General design requirements

**10.40** The medical vacuum system should not be used to remove waste anaesthetic gases. The medical vacuum system is designed to provide a suction pressure of 400 mm Hg (53 kPa) at the terminal unit – see Chapter 9. If the patient was inadvertently connected to this suction pressure, it would almost certainly prove fatal.

**10.41** Canisters which adsorb the volatile agent from the waste anaesthetic gases are available, but are not recommended as a substitute for an AGSS because they cannot adsorb nitrous oxide.

**10.42** All safety devices should fail safe.

**10.43** AGSS are in contact with the patient's expired breath and hence there is the potential for bacteriological contamination. The materials should be reasonably resistant to corrosion, and should withstand cleaning, disinfection or sterilization as appropriate. It is recommended that the transfer system and other detachable components should withstand steam sterilization at 134 + 3–0°C. The manufacturer should recommend methods of cleaning, disinfecting and sterilizing the system and the manufacturer's recommendations should be followed.

**10.44** The fixed pipework may be of copper or other suitable material such as PVC. Where copper pipework is installed at the same time as the MGPS, it is desirable to use degreased pipework to the same specification as that used for the MGPS (see Chapter 13) in order to avoid confusion.

**10.45** Where PVC pipes larger than 38 mm diameter pass through a fire compartment, they should be protected with metal sleeves extending for 1 m either side of the compartment, in accordance with the building regulations. The requirements of Firecode and HTM 81 should be followed.

### Safety criteria

**10.46** The following safety criteria are specified in BS6834:1987 (1992) and all AGSS should comply with these criteria, irrespective of whether they comply fully with the other requirements of the British Standard.

Table 15 Safety criteria for AGSS

|                                                                       | Maximum pressure at inlet at 30 l/min continuous flow  | Maximum pressure at inlet at 90 l/min continuous flow  |
|-----------------------------------------------------------------------|--------------------------------------------------------|--------------------------------------------------------|
| Positive pressure relief at inlet to transfer system                  | 50 Pa                                                  | 500 Pa                                                 |
|                                                                       | Maximum pressure increase at inlet at 30 l/min for 5 s | Maximum pressure increase at inlet at 90 l/min for 5 s |
| With any hose or tubing totally obstructed                            | 1 kPa                                                  | 2 kPa                                                  |
| Maximum induced flow to the receiving system from the transfer system |                                                        |                                                        |
| 0.5 l/min                                                             |                                                        |                                                        |

**10.47** Experience shows that any sub-atmospheric pressure at the patient end of the AGSS may induce a gas flow from the breathing system under certain conditions. Whilst this does not result in any barotrauma, there have been instances where insufficient gas has been available to the patient as a result of this phenomenon. Therefore there is a requirement in the British Standard that the induced flow from the patient's breathing system should not exceed 0.5 l/min.

### Performance criteria

**10.48** An AGSS which complies with BS 6834:1992 is intended to remove all gases delivered to the receiving system, within the performance and safety criteria specified. There should be no spillage of nitrous oxide from the receiving system when the AGSS is set up as specified in the British Standard. This test is intended to be carried out by the manufacturer. It is not easy to reproduce the specified challenge waveform in an operating department. It should not be necessary to carry out this test on-site, as no spillage should occur provided the extract flow and pressure losses are within the specified limits.

**10.49** The performance criteria for the disposal system are specified in the British Standard in terms of the extract flows at specified resistance, as shown in Table 15.

**10.50** The performance criteria shown in Table 2. (Anaesthetic gas scavenging systems) should be achieved regardless of the number of terminal units on each system; where more than one terminal unit is provided on the system, the performance criteria should be achieved with all, or one, of the terminal units operative.

Table 16 Performance criteria for disposal systems

|                                                                   |                                                                   |
|-------------------------------------------------------------------|-------------------------------------------------------------------|
| Flow with a resistance to flow producing a pressure drop of 1 kPa | Flow with a resistance to flow producing a pressure drop of 4 kPa |
| Maximum flow 130 l/min                                            | Minimum flow 80 l/min                                             |

**Flow diversity**

10.51 Although more than one AGS terminal unit may be installed in an operating room or anaesthetic room for convenience, it may be assumed that only one terminal unit will be in use at any given time. It may also be assumed that the AGS terminal unit in the anaesthetic room and in the operating room will not be in use simultaneously. Therefore, when sizing the plant, assume one receiving system only in use for each theatre suite.

**Discharge outlet**

10.52 Careful consideration should be given to siting the discharge outlet from the disposal system. It should preferably be sited at roof level, well away from ventilation inlets, opening windows and other apertures, to prevent pollution from re-entering the building.

**Duplex system**

10.53 Where duplex systems are installed, each pump should be capable of meeting the full design flow.

**Plant control indication**

10.54 There should be indicators to show the following conditions:

| Indication                        | Legend          |
|-----------------------------------|-----------------|
| a. green " mains on and air flow" | normal          |
| b. yellow " duty pump failed"     | plant fault     |
| c. red " system failed"           | plant emergency |

10.55 Indicator panels should be installed in the operating room and the nurses' station.

10.56 The air flow, that is, " plant on" , indication should be initiated by either a pressure switch or air flow detection device at the pump, that is, mains supply to the pump is not sufficient.



# 11.0 System design – nitric oxide

## Nitric oxide pipeline installations

### Introduction

**11.1** Nitric oxide (NO) pipeline installations are a developing science at preliminary stages. The following paragraphs are intended as best practice guidance at present.

**11.2** The use of nitric oxide as a selective pulmonary vasodilator has had a major impact on the management of both neonates and adults suffering from respiratory distress syndrome. The immediate improvement in the patient's condition with nitric oxide has made its use routine, although the long-term benefits have yet to be established by clinical trials.

**11.3** Until recently, delivery systems have relied on the use of portable cylinders, either AV (10 litre) or AK (40 litre) aluminium cylinders located at the bedside. The introduction of such cylinders, however, adds to the congestion in highly serviced ward spaces and proves an additional safety hazard to both staff and patients. Whereas the smaller AV-size cylinder is more manageable, its smaller capacity exacerbates the likelihood of running out, which could cause patients to suffer pulmonary vasodilation resulting in hypoxia and pulmonary hypertension.

**11.4** The installation of a pipeline distribution system is intended to provide a safe and reliable method of gas delivery. It also helps to reduce congestion in the bed area and to ensure an adequate continuous supply of gas without compromising its quality.

### Design considerations

**11.5** In the UK, nitric oxide for medicinal use is currently supplied as a mixture of 1000 ppm in nitrogen. (This may change in the future.)

*The breathing system should include nitric oxide and nitrogen dioxide monitoring systems*

**11.6** The therapeutic concentration of nitric oxide required in the patient breathing system is normally between 5 and 20 ppm, with a maximum flow at each terminal unit of about 200 ml/min. The gas is administered in conjunction with medical oxygen to maintain the appropriate oxygen concentration to the patient.

**11.7** In the presence of oxygen, nitric oxide forms higher oxides of nitrogen, particularly nitrogen dioxide (NO<sub>2</sub>), and dinitrogen trioxide (N<sub>2</sub>O<sub>3</sub>). The rate of conversion depends upon both the concentration of nitric oxide and oxygen. The higher the concentration of both components, the faster the rate of oxidation. This is shown in Table 17.

**11.8** In the presence of moisture, these compounds form nitric acid (HNO<sub>3</sub>) and nitrous acid (HNO<sub>2</sub>) which will react with the traditional materials used for MGPS.

**11.9** Although during normal operation no part of the pipeline should become contaminated with oxygen and moisture, experience has shown that

## 11.0 System design – nitric oxide

such contamination is possible. Consequently, the use of austenitic 303 stainless steel is recommended for terminal units, non-interchangeable screw thread (NIST) connectors, pipeline installation components and manifolds. Elastomeric components used for valve seats, low-pressure flexible connecting assemblies etc should be compatible with nitric oxide.

Table 17 Nitric oxide conversion rates

| O <sub>2</sub> % | NO ppm |       |      |      |
|------------------|--------|-------|------|------|
|                  | 20     | 40    | 80   | 120  |
| 20               | 60.08  | 12.86 | 3.00 | 1.32 |
| 30               | 40.05  | 8.56  | 2.00 | 0.88 |
| 40               | 30.03  | 6.43  | 1.35 | 0.66 |
| 50               | 24.03  | 5.15  | 1.20 | 0.52 |
| 60               | 20.01  | 4.28  | 1.00 | 0.44 |
| 70               | 17.16  | 3.66  | 0.85 | 0.37 |
| 80               | 15.09  | 3.20  | 0.75 | 0.33 |
| 90               | 13.35  | 2.85  | 0.66 | 0.24 |
| 100              | 12.01  | 2.56  | 0.60 | 0.26 |

Time (min) to yield 5 ppm NO<sub>2</sub> with different mixtures of NO in nitrogen.

### Provision of terminal units, valves and area valve service units (AVSU)s

**11.10** In highly serviced ward areas such as neonatal intensive care units and ITUs, it is normal policy to provide at least two oxygen, two MA(4 bar), and two vacuum terminal units for each bed space.

**11.11** To ensure maximum flexibility it is similarly recommended that two nitric oxide terminal units are installed for each bed space.

**11.12** The provision of nitric oxide has also been suggested for installation in specialist operating departments. A clinical judgement will have to be made on such provision, taking into account the additional complexity and consequences of discontinuation of the supply during patient transfer.

**11.13** BS 5682 does not include a terminal unit for nitric oxide. In the absence of standards the dimensions given in Table 3 are recommended; they are based on the figures and tables in BS 5682:1984.

### Manifold

**11.14** The manifold should be located near to the areas to be served, in secure accommodation and provided with good ventilation to the outside. The accommodation should comply with the general requirements in this HTM and have good access for cylinder handling.

**11.15** In existing premises it may not be practicable to provide an external manifold room. In such cases, mechanical ventilation will be necessary to prevent the accumulation of gas in the event of a leak and during purging after cylinder changing.

**11.16** The manifold should be semi-automatic, complying with the requirements for medical gas manifolds in this HTM.

**11.17** Additionally, the manifold should have a nitrogen purging facility to purge any air introduced during cylinder changeover on each tailpipe. The purging system should be provided with venting to outside to allow purging with the working gas before the manifold is made ready for service. The pressure of the nitrogen supply used for purging needs to be set below the minimum operating pressure of the manifold, to prevent supply of nitrogen to the patient and to prevent overriding of the alarm system.

**11.18** Purging/changeover procedures are given in the 'Operational management' volume of this HTM.

**11.19** The manifold and line pressure safety valve vents should be piped to discharge in a safe external location.

**11.20** A gas-specific connector for nitric oxide cylinders is currently under review. This connector will include a minimum pressure retention device to prevent cylinder contamination with air.

**11.21** The manifold operating pressure should be set to 4.2 bar g as recommended for other medical gases. The nitrogen purging system should be set to operate at 2 bar g, such that the warning system will continue to alarm if the service gas cylinder valves are not opened after cylinder charging.

#### **Provision of valves**

**11.22** Where nitric oxide systems are installed within or close to the department served, the control of the distribution system will be by AVSUs and valves installed as part of the manifold system.

**11.23** Where nitric oxide manifolds are remotely located, AVSUs will need to be installed within the ward area.

#### **Provision of AVSUs**

**11.24** AVSUs should be provided for the neonatal intensive care unit, ITU and theatres (if provided) to control one of each pair of terminal units installed. This will ensure continuity of gas supply if the need arises for urgent servicing or repair of terminal units.

**11.25** AVSUs for nitric oxide systems will not require NIST connectors or blanking spades. They will be of stainless steel construction and enclosed in a lockable box with emergency access.

**11.26** Many nitric oxide systems will be installed in existing premises which may preclude the recommended valving arrangement. Where it is impracticable to separate individual pairs of terminal units, it is recommended that at least half of the total number should be serviced from a separate AVSU.

**11.27** AVSUs will be required to isolate terminal units for servicing, since nitric oxide and nitrogen dioxide are toxic, and the check valves typically included in terminal units for this purpose are not considered to be sufficiently gas-tight.

#### **Pipeline distribution**

**11.28** The flows of nitric oxide in clinical use are modest and pressure loss is not a critical design factor. The installation will generally comprise 6 mm stainless steel tubing installed by means of orbital welding using an argon

shield. Argon should also be used during pressure testing and purging prior to commissioning.

**Identification**

11.29 The pipeline installation should bear identification generally in accordance with this HTM. Green has now been accepted as the identification colour.

**Alarm systems**

11.30 The main alarm system indicator panel should be located in one of the critical care areas where, as stated in the operational policy for the hospital, staff responsible for cylinder management can be contacted. Repeater alarm panel(s) should be located elsewhere, for example the neonatal intensive care unit.

11.31 The alarm system should comply fully with the appropriate requirements for manifold alarms and as follows:

| Condition                                        | Legend                        | Colour | Audible |
|--------------------------------------------------|-------------------------------|--------|---------|
| a. duty bank empty – change over to standby bank | change cylinder               | yellow | yes     |
| b. standby bank below 50% capacity               | change cylinder immediately   | yellow | yes     |
| c. purge cylinder pressure low 10%               | change cylinder immediately * | yellow | yes     |
| d. pipeline pressure below 80%                   | pressure fault                | red    | yes     |

\* This action will be necessary before changing working gas cylinder.

**Nitric oxide – risk assessment for COSHH compliance**

11.32 Concerns about the effects of exposure to waste anaesthetic agents are well documented and have lead to the development of AGSS. In some departments, AGSS is not a practical control method and, based on a risk assessment, ventilation is considered to be a satisfactory alternative.

11.33 The quoted occupational exposure limits for nitric oxide are 25 ppm over an 8 hour time-weighted average and 35 ppm for 15 minutes, and for nitrogen dioxide are 3 ppm over an 8 hour time-weighted average and 5 ppm for 15 minutes.

11.34 Therapeutic concentrations of nitric oxide are extremely low, below current occupational exposure limits. The conversion to higher oxides of nitrogen (which is time- and concentration-dependent) is unlikely to result in occupational exposure limits being exceeded.

**11.35** Tests have shown that with no scavenging, but ventilation providing 12 air changes per hour, the highest levels recorded were in the vicinity of the ventilator outlet and were between 2.0 and 8 ppm nitric oxide and 0.2 to 0.5 ppm nitrogen dioxide were recorded. (With scavenging, the maximum levels were respectively 0.2 ppm and a nil value for nitrogen dioxide.)

**11.36** On this evidence, the provision of waste gas scavenging does not appear to be an occupational hygiene priority although, if otherwise available, staff may wish to use an existing system. (Standard AGSS components and materials are satisfactory.)

**11.37** Chemical adsorption filters are possible, but their availability is limited and, taking into account the relative risk, may introduce a greater problem of disposal.

#### **Validation and verification**

**11.38** Pressure testing and purging should be carried out in accordance with 'Validation and verification', except that argon should be used prior to this stage.

**11.39** On satisfactory completion of all purging, the system should be filled with the working gas and all terminal units should be checked for gas identity. Quality tests should be performed using argon prior to this stage.

# 12.0 Warning and alarm systems

## General

**12.1** The provision of a warning and alarm system is essential to monitor the safe and efficient operation of MGPS. There are three reasons for this monitoring:

- a. to indicate normal function of the pipeline system by means of visual indicators;
- b. to warn by visual and audible indication that routine replacement of cylinders or other engineering action is required;
- c. to inform the user by visual and audible emergency alarms that abnormal conditions have occurred which may require urgent action by the user. This alarm condition will require a rapid response by the various departments' staff.

**12.2** A schematic diagram of a typical warning and alarm system layout is shown in Figures 16 and 17.

**12.3** Warning and alarm systems are required for all medical gas and vacuum systems. A much simplified system is required for surgical air systems and for anaesthetic gas scavenging systems (AGSS), with the warning/indication panel located in the operating room.

**12.4** Warning and alarm systems comprise pressure sensors, a central system providing information on all monitored functions, with repeater panels located where information is required to ensure the necessary action is taken. Area alarms should be provided to give warning to users downstream of the designated area valve service unit (AVSU).

**12.5** Pressure sensors should be connected to the pipeline by means of minimum leak devices.

**12.6** All MGPS warning and alarm indicating panels should comply with the requirements of this HTM, including all operating room panels.

## Panel location

### Central indicator panel

**12.7** Warning and alarm conditions for all medical gases in a central system should be displayed on a central panel which is located in a position subject to continuous 24 hour observation, such as the telephone switchboard room or the porter's lodge.

### Repeater indicator panel location

**12.8** Repeater panels include an audible facility and should be provided for a central system to display information which is essential for the continuing operation of the system.

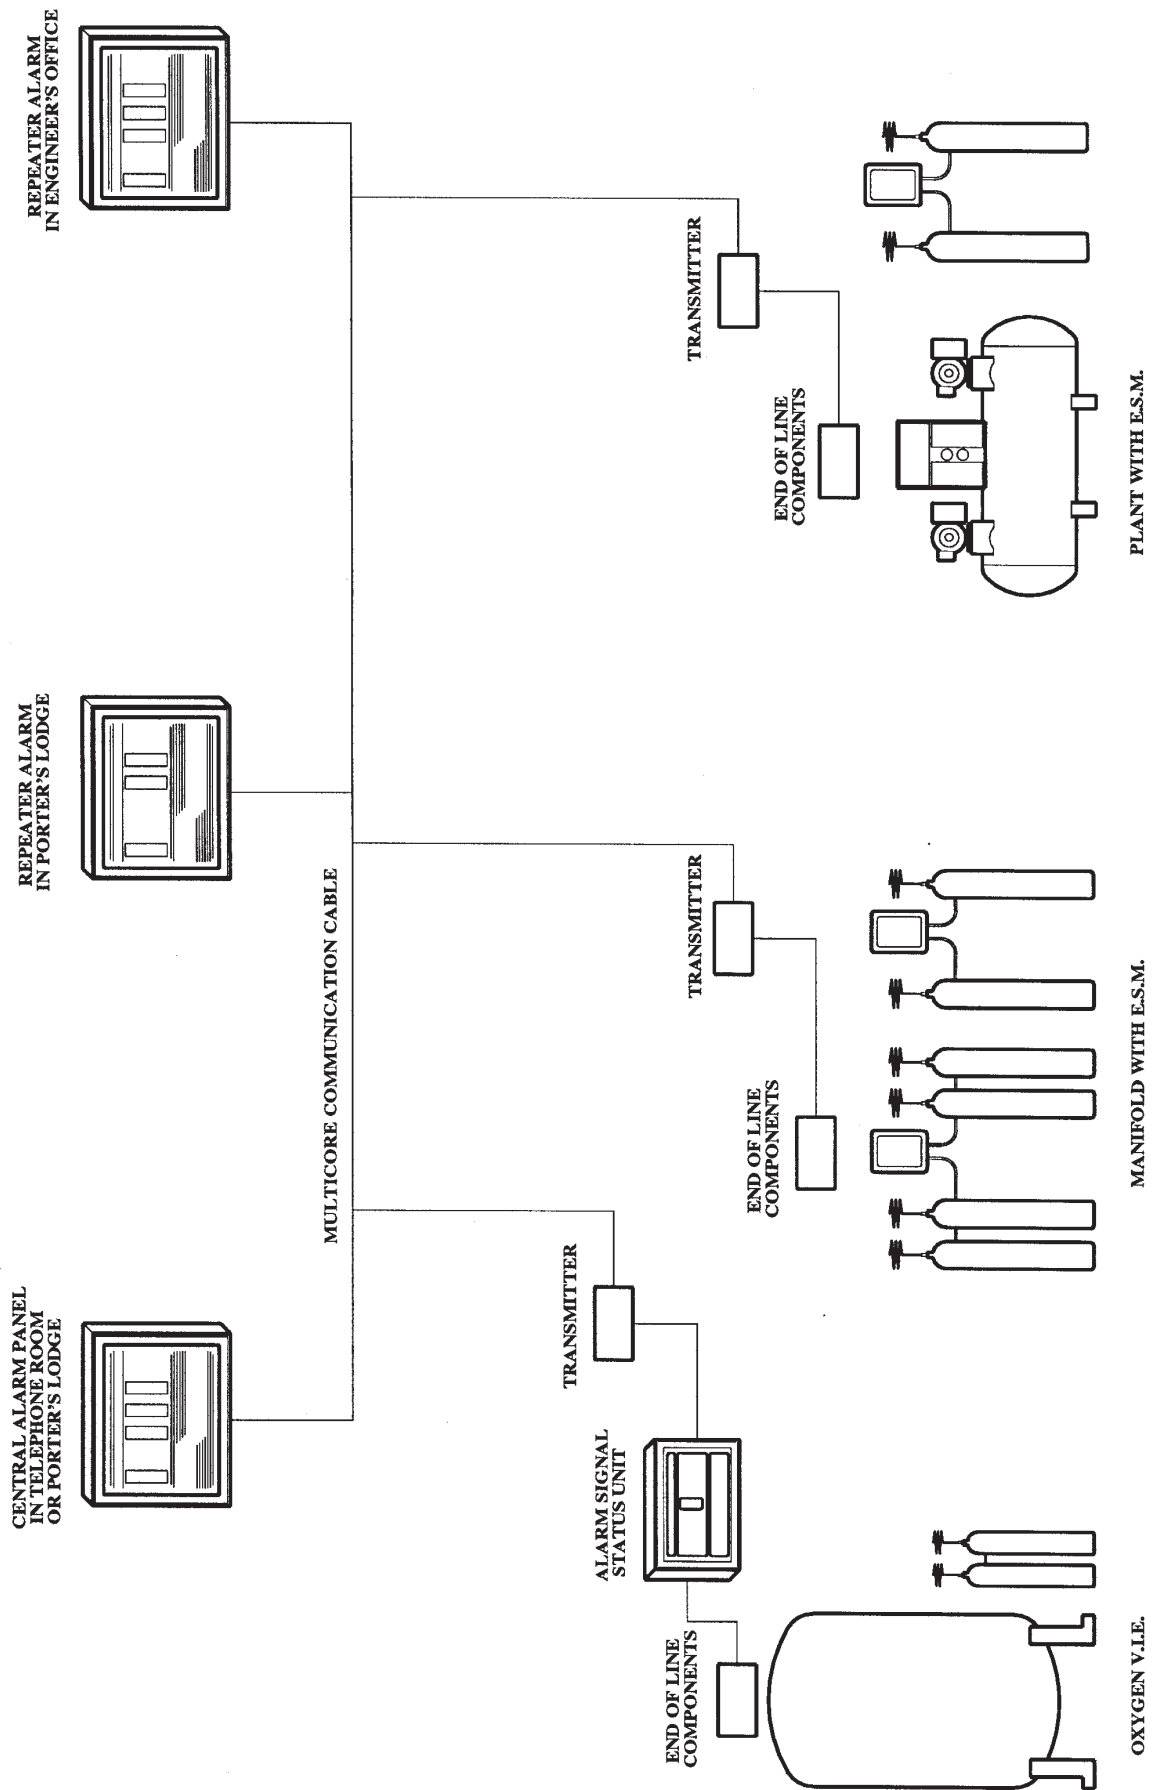

Figure 16 Typical warning and alarm system layout (reproduced by kind permission of Shire Controls)

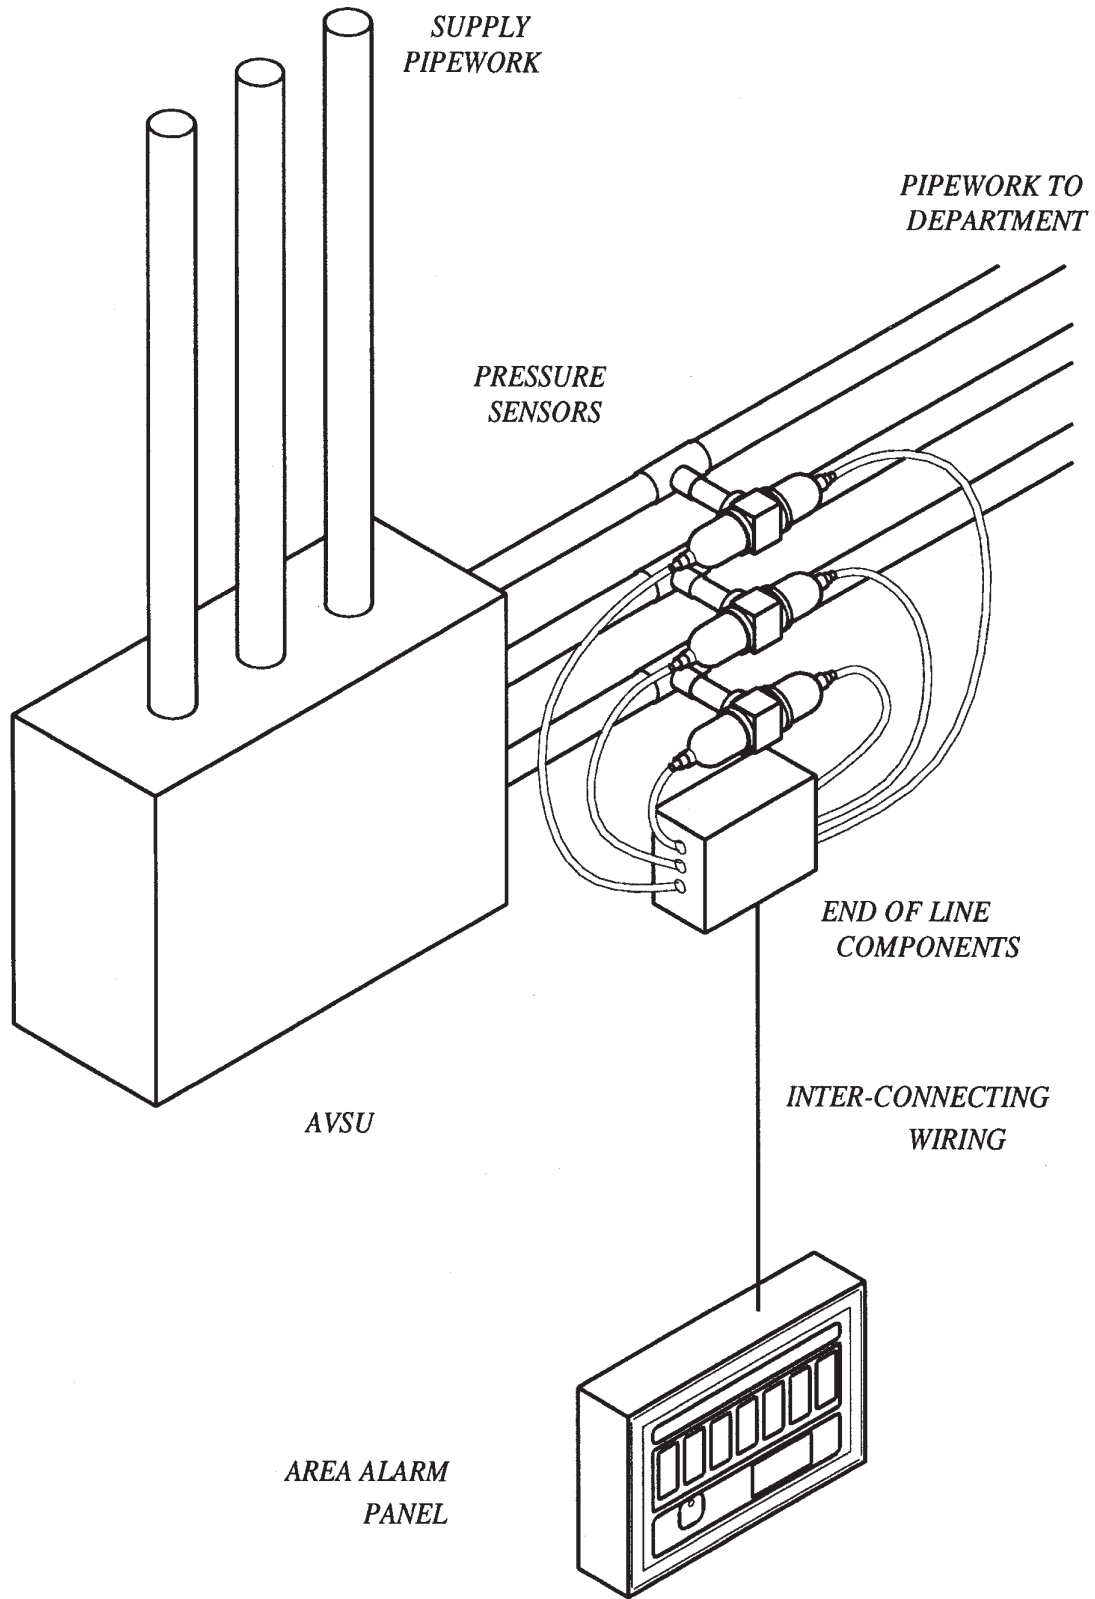

Figure 17 Typical area alarm panel (reproduced by kind permission of Shire Controls)



*Sensors may be fitted within the AVSU enclosure*

### Area warning and alarm panel location

**12.9** Local systems to display high and low gas pressure in the area should be installed downstream of the AVSU. The sensors for these systems should be located downstream of designated AVSUs. It should not be possible to isolate the sensor with a separate shut-off valve. The panel, appropriately labelled, should be located at a nurses' station within each department, and in special departments (SCBU, ITU and A & E). Some warning system information may be appropriate in the pharmacy department, particularly in the case of pressure swing adsorber (PSA) plant, synthetic air plant and compressed air systems.

## System description

### System components

**12.10** Warning and alarm systems include the following functional elements:

- a. transmitters which convert the signal from the plant or manifold volt-free alarm contacts into a form which can be transmitted via multiplexed cable (for example using pulse width modulation – see Figure 18). The transmitter may be a separate unit or may be incorporated:
  - (i) in plant or manifold control panel;
  - (ii) in a separate unit;
  - (iii) in an indicator panel.

Cases (ii) and (iii) should include line fault monitoring devices;

- b. indicator panels which display the transmitted signals;
- c. interconnecting multiplex wiring which connects all transmitters to all indicator panels.

### System layout

#### *Central system*

**12.11** A typical system layout is shown in Figure 16, which shows initiating devices at remote locations such as the vacuum insulated evaporator (VIE) compound, medical air and vacuum plantrooms, nitrous oxide manifold room and emergency/reserve manifold rooms. The transmitters are normally located close to the initiating devices. Indicator panels are typically located at the telephone exchange, the porter's room and the engineer's office, to provide information requiring action by engineering and other support staff. Certain critical care areas such as theatres, delivery suites, special care baby units and intensive care units should also have repeater indicator panels on the central system to show emergency alarms which require action from the user.

#### *Area warning and alarm systems*

**12.12** A typical layout of an area system is shown in Figure 17. For each gas service there should be local pressure switches for high and low pressure. These conditions should be indicated on a locally mounted indicator panel, with facility to provide a common alarm condition for connection to other alarm panels. The extent of the interconnecting wiring in an area alarm system

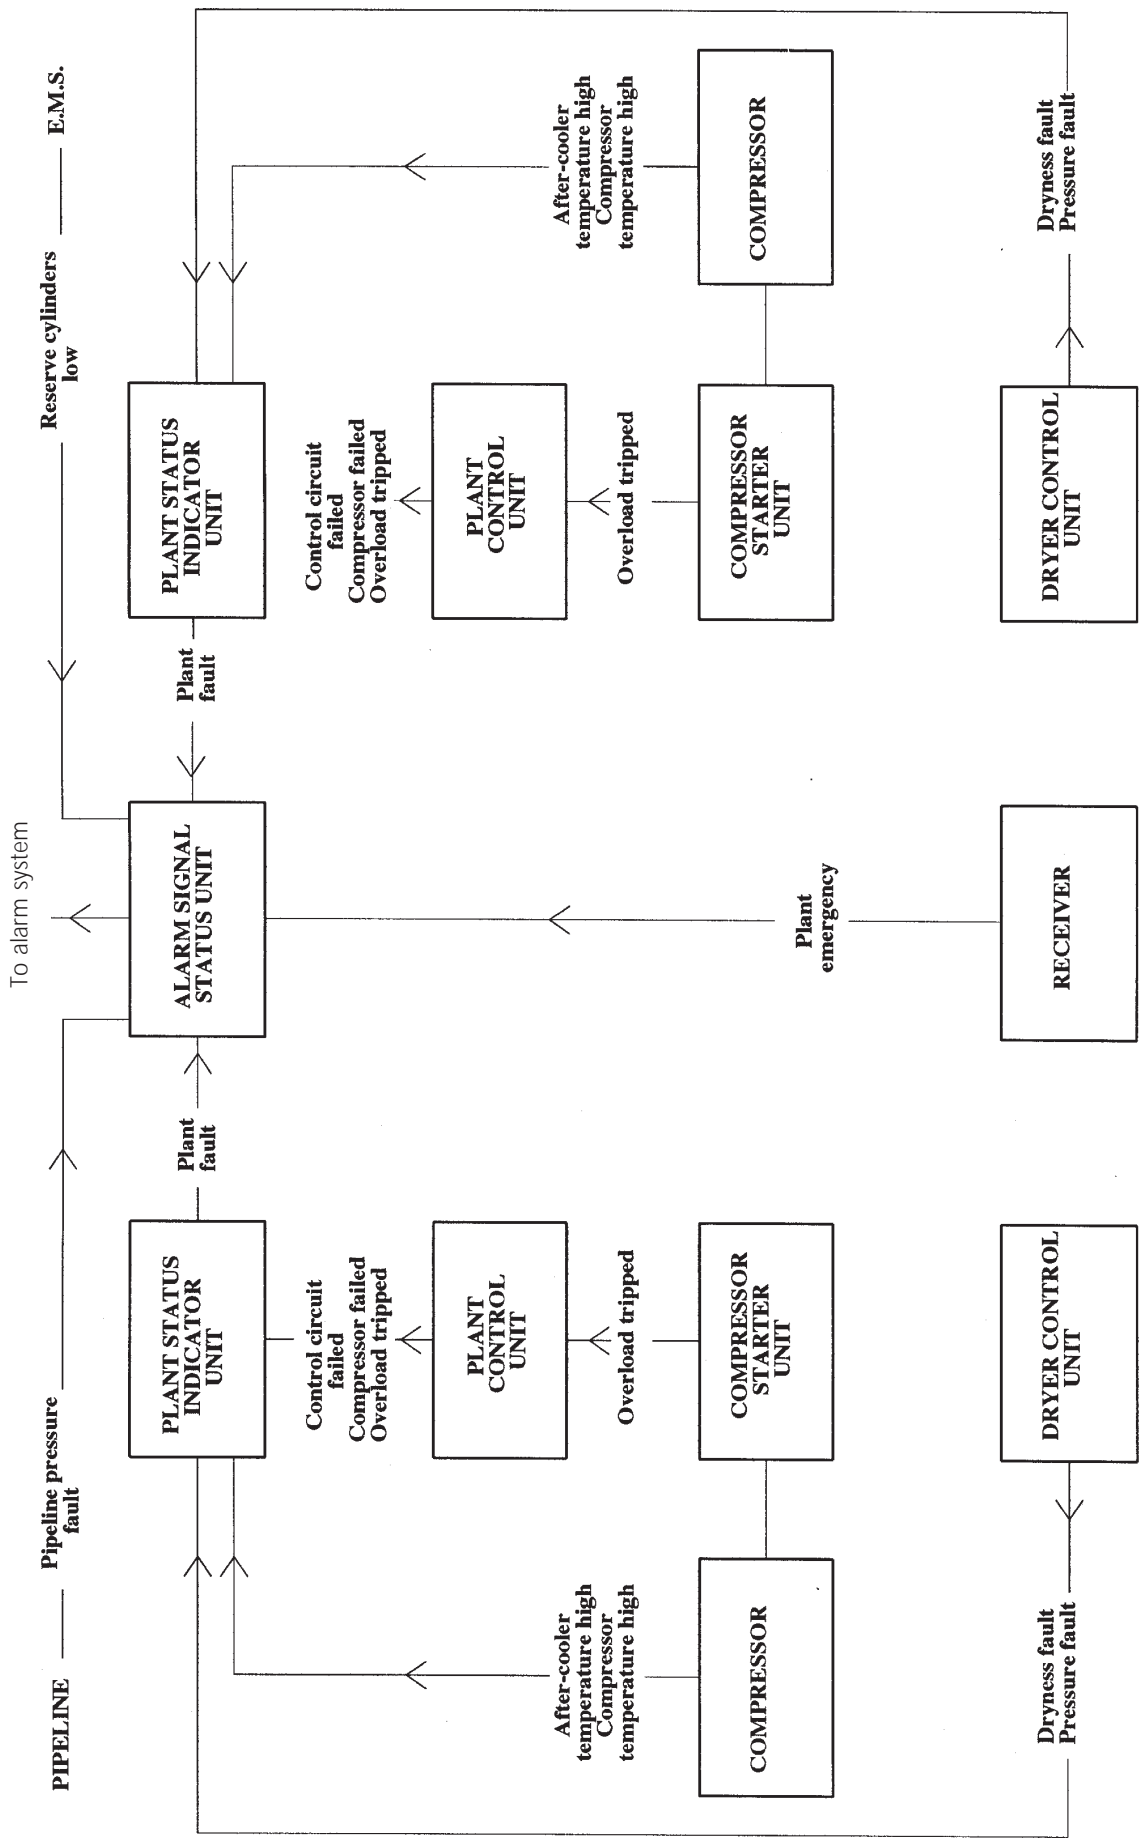

Figure 18 Signal path for typical plant (reproduced by kind permission of Shire Controls)

is reduced by comparison with a central system. The area alarm panels carry no indication of the warnings for cylinder replacement and plant function which are given on central systems.

## General requirements

### Labelling

**12.13** All visual signal panels should be permanently labelled according to their function, including clear identification of the areas, rooms or departments served.

### Visual signals

**12.14** Flashing visual signals should have alternate periods on and off, each of equal duration between 0.25 and 0.50 seconds.

**12.15** There should be two separately energised light sources for each signal, arranged so that the failure of one source does not affect the other.

**12.16** The light sources should have a design life of at least five years of continuous operation.

### Audible signals

**12.17** All audible signal tones should be modulated equally at a rate of 4 Hz±10% between two tones of 440 Hz±10% and 880 Hz±10%.

### Automatic re-setting

**12.18** When a warning or alarm signal occurs and the system condition subsequently reverts to normal, the corresponding visual and audible signals should automatically reset to normal.

### Temporary muting

**12.19** Means must be provided on each panel for the user to mute the audible signal. The signal must re-sound after a nominal 15-minute period if the fault condition still exists. The process of muting and reinstatement of the signal should be repeated until the fault condition has been rectified. Operation of the mute should be accompanied by change from flashing to steady illumination of the corresponding visual indicator on the central panel only. Operation of the mute on area alarm or repeater panels should not be accompanied by a change from flashing to steady illumination.

### Continuous muting

**12.20** An internally mounted switch should be provided to allow continuous muting during periods of maintenance. When the system condition returns to normal the continuous muting should automatically reset to normal operation. When the continuous muting is in operation on any alarm condition, it should not prevent the operation of the audible signal on other alarm conditions when a fault condition arises.

## Electrical wiring

12.21 All electrical wiring should be in accordance with IEE regulations.

## System integrity

12.22 If extra low voltage (ELV), maximum 50 V, is superimposed on the signal or communication circuit (for example by cross-connection), the system design should ensure that any damage to the system is limited to replaceable panel components and that such damage is indicated as a system fault.

12.23 The performance of the system should not be compromised by the use of multi-core cabling which carries ELV and communication signals in adjacent cores.

12.24 The system should be designed to reject spurious radio frequency (RF) or mains noise typically arising in hospitals, examples being diathermy equipment and current spikes caused by plant start-up etc.

## Relay conditions

12.25 If relays are used to transmit alarm signals, the relays should be energised in their normal closed condition.

## Mains power supply

12.26 The mains electricity supply should be derived from the essential power supply (that is, must be on the emergency system).

## SELV/FELV power supply

12.27 The panel power may be designed either as a safety extra low voltage (SELV) system or a functional extra low voltage (FELV) system, as defined in Part 4 of the IEE Wiring Regulations.

12.28 The ELV power supply may be housed either in the alarm panels or in a separate metal enclosure.

12.29 The power supply should be rated for the full load of the panel, with visual and auditory signals on all normal and alarm conditions.

## Test facility

12.20 Each panel should be provided with a means to test all visual and audible signals on that panel. The power supply should be capable of sustaining all indicators and audibles.

## Warning and alarm system faults

### General

12.31 A flashing red visual indicator and an audible signal should operate on all panels when any of the following conditions occur:

- a. line fault from the initiating device;
- b. communication fault or other wiring fault;
- c. mains power failure.

#### **Line fault**

**12.32** The system should monitor the integrity of the lines between the initiating devices and the panel or transmitter units. The "alarm system fault" condition should be indicated on loss of integrity, for example open or short circuits.

#### **Communication/wiring fault**

**12.33** The system should indicate an alarm system fault in the event of loss of data transmission between panels and transmitters.

#### **Mains power failure**

**12.34** Failure of mains power should be shown by a flashing red indicator and an audible signal, which should be powered from an internal battery. The audible signal may be muted and not automatically reinstate as required under normal power supply (see paragraph 12.19), but the visual indicator should continue to flash until either the fault has been rectified or the battery has discharged.

#### **Standby battery**

**12.35** A battery should be provided with sufficient capacity to power the visual and audible "alarm system fault" signal for a minimum period of four hours. The battery should be sealed and exchangeable and should automatically recharge within 72 hours.

#### **Legend**

**12.36** The legend on this indicator should be "alarm system fault" .

## **Indicator panel requirements for all systems**

#### **Indicators**

**12.37** Panels should be provided with all indicators for the gas services in local use.

**12.38** The visual indicators should be arranged vertically in priority order, with the normal indicators at the top. The sequence of gas services should be from left to right:

- a. medical oxygen (cryogenic and cylinders/pressure swing adsorber (PSA) systems);
- b. nitrous oxide;
- c. nitrous oxide/oxygen mixture;
- d. medical air 400 kPa (compressor plant, cylinders and synthetic air);

## 12.0 Warning and alarm systems

- e. medical vacuum (pumps);
- f. nitric oxide;
- g. oxygen/carbon dioxide mixture;
- h. surgical air 700 kPa.

**12.39** In addition to the gas service signal indicators, each panel must include:

- a. a green "power on" indicator without an audible signal;
- b. a red "alarm system fault" indicator with an audible signal.

### Labelling

**12.40** Panels should be labelled as follows:

- a. medical gas alarm;
- b. with the identification of the medical gas services indicated, and the areas and departments served.

### Construction

**12.41** The fascia panel should be removable to allow access to the rear of the fascia or to the panel for maintenance purposes.

**12.42** Access to the interior of the panel should be tamper-proof.

**12.43** It should be possible to replace the source of illumination without removing the legend.

**12.44** Panels should have electrical sections with protection at least equal to IP 32 of BS 5490:1977.

**12.45** Panels and their housings should be of adequate strength for their purposes and be manufactured from corrosion-resistant materials.

**12.46** If gas services are brought into the panel, they should be housed in separate, enclosed compartments which are vented to the outside.

**12.47** There should be gas-tight seals where electrical services pass through any gas compartment.

### Remote audible sounder

**12.48** All panels should have provision for connection to a remote audible sounder.

## Central indicator panel requirements

### Displays

**12.49** The central panel should display all signals for all MGPS which are generated by the warning and alarm system, as follows:

*Normal*

The normal condition for all piped MGPS should be displayed as a steady green visual signal. The "normal" indicator should extinguish in warning and alarm conditions.

*Warnings*

Warning conditions appropriate to each MGPS should be displayed as a flashing yellow visual signal which may be accompanied by a mutable audible signal (see Table 19).

*Emergency alarms*

Emergency alarms are generated by loss of pipeline pressure or vacuum and are indicated by flashing red visual signals accompanied by mutable audible signals.

*Alarm system fault*

The "alarm system fault" condition should be displayed as a flashing red visual signal accompanied by a mutable audible signal.

**Mute functions**

**12.50** The temporary mute should cancel the audible signal for about 15 minutes and change the visual indicators from flashing to continuous on all central and repeater panels.

**12.51** Operation of the continuous mute should inhibit the 15 minute reinstatement of the audible alarm.

**12.52** Operation of the mute should not inhibit the visual or audible indication of any subsequent alarm conditions.

**Panel legend and display**

**12.53** Panel legend and display should be as shown in Table 19.

**Repeater indicator panel requirements****Displays**

**12.54** The repeater indicator panel should always display "normal", "emergency alarm" and "alarm system fault" conditions as given above. The repeater panel should display some or all of the warning conditions which are displayed on the central indicator panel as given in paragraph 12.49. The extent of the display of warnings should be varied to suit local clinical requirements.

**Mute functions**

**12.55** The temporary mute should cancel the audible signal for about 15 minutes whilst the visual indicator continues to flash. Operation of the temporary mute (on the central panel) should change the visual indicator to continuous illumination.

**12.56** Operation of the continuous mute must inhibit the 15-minute reinstatement of the audible alarm.

**12.57** Operation of the mute should not inhibit the visual or audible indication of any subsequent alarm conditions.

#### **Panel legend and display**

**12.58** The panel legend and display should be as shown in Table 19.

### **Area warning and alarm panel**

#### **Displays**

**12.59** Area panels should display "normal", "emergency alarm" and "alarm system fault" conditions as given in paragraph 12.49.

#### **Mute functions**

**12.60** The temporary mute should cancel the audible signal for about 15 minutes whilst the visual indicator continues to flash.

**12.61** Operation of the mute should not inhibit the visual or audible indication of any subsequent alarm conditions.

#### **Panel legend and display**

**12.62** The panel legend and display should be as shown in Table 20.

#### **Location**

**12.63** The initiating devices for local area alarms should be located after designated AVSUs. This designated position will normally be after the final AVSU.

**12.64** The area alarm panel should be located where it will be clearly visible, for example in the operating room or at the reception desk, not in a corridor or unmanned area.

**12.65** Area alarm panels should be designed similarly to central alarm panels. All alarm/indicators installed in operating departments should comply with the requirements of this HTM, and any medical gas indicator should similarly comply with these requirements.

**12.66** For multi-theatre complexes, and critical care areas with several AVSUs, the signals from each theatre area alarm panel may be multiplexed to a single alarm panel.



Table 19 Signals and display locations on central alarm systems

| Plant                                                                          | Alarm condition                                                                                                                 | Legend                                 | Colour           | Auditory signal | Location ABCD |
|--------------------------------------------------------------------------------|---------------------------------------------------------------------------------------------------------------------------------|----------------------------------------|------------------|-----------------|---------------|
| Cryogenic oxygen plants                                                        | 1 VIE low <50%                                                                                                                  | Refill liquid                          | Yellow           | yes             | AB            |
|                                                                                | 2 VIE low <25%                                                                                                                  | Refill liquid immediately              | Yellow           | yes             | AB            |
| Automatic manifolds                                                            | 1 duty bank empty; standby bank running                                                                                         | Change cylinders                       |                  |                 |               |
|                                                                                | 2 standby bank below 10% capacity (14 bar N <sub>2</sub> O)                                                                     | Change cylinders immediately           | Yellow<br>Yellow | yes<br>yes      | ABD<br>ABCD   |
| Medical air compressor                                                         | 1 Plant fault                                                                                                                   | Plant fault                            | Yellow           | yes             | AB            |
|                                                                                | 2 Plant emergency                                                                                                               | Plant emergency                        | Yellow           | yes             | ABC           |
| Surgical air supply                                                            | 1 System fault                                                                                                                  | Change cylinders/<br>plant fault       | Yellow           | yes             | AD            |
|                                                                                | 2 Emergency/reserve low (if installed)                                                                                          | Reserve bank empty/<br>plant emergency | Red              | yes             | AD            |
| Medical vacuum plant                                                           | 1 Plant fault                                                                                                                   | Plant fault                            | Yellow           | yes             | AB            |
|                                                                                | 2 Plant emergency                                                                                                               | Plant emergency                        | Yellow           | yes             | ABC           |
| Oxygen concentrator                                                            | 1 Plant fault                                                                                                                   | Plant fault                            | Yellow           | yes             | AB            |
|                                                                                | 2 Plant emergency                                                                                                               | Plant emergency                        | Yellow           | yes             | ABC           |
| Compressed cylinders on reserve manifold serving an automatic manifold         | Reserve pressure below 68 bar (<14 bar for N <sub>2</sub> O)                                                                    | Reserve low                            | Yellow           | no              | AB            |
| Compressed air cylinders on reserve manifold serving a cryogenic oxygen system | Pressure in either bank of reserve <50%                                                                                         | Reserve low                            | Yellow           | no              | ABC           |
| Compressed cylinders on reserve manifold serving a compressor plant            | Pressure in either bank of reserve < 50%                                                                                        | Reserve low                            | Yellow           | no              | ABC           |
| Pressure fault (pipeline)<br>High or low                                       | For each gas service to indicate that the pressure in the distribution system has risen/fallen 20% from normal working pressure | Pressure fault                         | Red              | yes             | ABC           |
| Vacuum pressure (pipeline)                                                     | To indicate that the vacuum in the pipeline serving the department has fallen 20% below the normal working vacuum               | Pressure fault                         | Red              | yes             | ABC           |

## Locations:

- A central panel – telephone operator/switchboard and or/porter's room/24-hour manned;
- B facilities management office;
- C theatre manager's desk, special care baby unit and ITU nurses' station;
- D operating room.

For nitric oxide manifold alarm systems refer to Chapter 11.

Table 20 Area alarm legend and display

| Alarm function                                                                                                                         | Legend        | Colour | Auditory signal |
|----------------------------------------------------------------------------------------------------------------------------------------|---------------|--------|-----------------|
| For each gas service to indicate that the pressure in the pipeline serving the department has risen 20% above normal working pressure  | high pressure | red    | yes             |
| For each gas service to indicate that the pressure in the pipeline serving the department has fallen 20% below normal working pressure | low pressure  | red    | yes             |
| For vacuum to indicate that the vacuum in the pipeline serving the department has fallen 20% below normal working vacuum               | low vacuum    | red    | yes             |

## 13.0 Pipeline installation

### Accommodation of pipes

**13.1** Generally, MGPS should be kept away from areas where they may be subject to any of the following:

- a. mechanical damage;
- b. chemical damage;
- c. excessive heat;
- d. splashing, dripping or permanent contact with oil, grease or bituminous compounds, electrical sparks etc.

**13.2** Service ducts or voids containing medical gas pipelines should have adequate ventilation to prevent gas concentrations in the event of any leakage occurring.

**13.3** Exposed pipelines should not be installed in lift shafts, kitchens, laundries, boiler houses, generator rooms, incinerator rooms, storage rooms designed to house combustible materials or in any other fire risk area. Where pipelines in hazardous areas are unavoidable, they should be enclosed in non-combustible materials that will prevent the possibility of the liberation of gases into the room in the event of pipeline failure.

**13.4** Where pipelines are run in enclosed ducts with other services such as steam mains and water supply systems, they should be inspected regularly as corrosion can occur as a result of chloride deposits following leakage. They should not be run in enclosed ducts with other services where they cannot be inspected.

**13.5** Pipelines should be protected from the possibility of lightning strikes.

**13.6** Pipelines should be suitably protected where there is a possibility of physical damage, for example from the passage of trolleys. Wherever practicable a clearance of at least 25 mm should be maintained between each service and 150 mm should be the separation distance between medical gas pipeline and heating, hot water service and steam pipelines. Where pipelines cross over other services and a clearance of 25 mm cannot be maintained, they should be electrically bonded and wrap insulated, in accordance with IEE regulations. They should be bonded to main earth at building entry and exit.

**13.7** Buried pipelines should be run in a trench not less than 450 mm x 450 mm, with the pipe protected throughout its length by a continuous glazed earthenware pipe or carried in properly drained ducts with removable covers. These glazed pipes or ducts should be further protected where the pipe crosses areas used by wheeled traffic; in such areas the glazed pipes and ducts should be encased in concrete. Multi-way ducts should be used where more than one pipe is to be carried.

**13.8** The route of the pipeline should be identified on the surface and should be clearly shown on site layout drawings. Pipelines concealed within walls and floors should have their route clearly shown on "as-fitted" drawings. Pipelines should not be encapsulated in floors, and any joints should be kept to the minimum practicable. Pipelines in stud or plasterboard walls or partitions are acceptable.

**13.9** Care is required when selecting pipeline routes to prevent the pipes coming into contact with electric cables and wiring, and to minimise the risk of electric shock in the event of a fault on adjacent cables. See Chapter 2.

## Pipeline materials

### Quality

**13.10** The manufacturer should comply with BS EN ISO 9000 for pipes and for all materials including fittings, terminal units etc. A complete specification is given in Model Engineering Specification C11.

**13.11** Where materials are obtained from suppliers from other countries, the suppliers should be registered in accordance with BS EN ISO 9000.

### Pipes

**13.12** Material for pipes should be phosphorus de-oxidised, non-arsenical copper to BS 6017. Dimensions must be in accordance with BS 2871, Part 1, Table X or Table Y.

### Pipe jointing fittings

*For straight couplings, expanded joints may be made instead of using BS 864 fittings*

**13.13** Materials for pipe jointing fittings must be phosphorus de-oxidised, non-arsenical copper to BS 6017:1981 (1989). Pipe jointing fittings should be end-feed capillary fittings to BS 864.

### Other fittings

**13.14** Other fittings for connection to copper pipes, for example valve and control panel fittings, may be of copper, brass, gunmetal or bronze to the appropriate standard.

## Cleaning

### Pipes

*Pipes should only be cut with wheel pipe-cutters, not hacksaws, to prevent the ingress of particulate matter*

**13.15** All pipes must be cleaned and degreased for oxygen service and be free of particulate matter and toxic residues. They must be individually capped at both ends and delivered to site identified as medical gas pipes.

### Pipe jointing fittings

**13.16** All pipe jointing fittings and sub-assemblies of fittings for connection to pipes must be cleaned and degreased for oxygen service and be free of particulate matter and toxic residues. They must be individually sealed in bags or boxes and delivered to site identified as medical gas fittings.

**13.17** Although it is not essential to degrease vacuum installations, these are frequently installed by the contractor simultaneously with the medical gas pipelines. Degreased pipe and fittings should, therefore, be used for the

vacuum installations to avoid confusion. PVC pipework may also be used for vacuum and anaesthetic gas scavenging systems (AGSS), and is generally used for larger systems.

## Pipeline jointing

### General

**13.18** Except for mechanical joints, copper-to-copper joints only will be permitted on site, made with brazing filler rods which can be used without flux and in the presence of oxygen-free nitrogen, which will be blown through the pipeline during brazing procedure to prevent the formation of oxides.

**13.19** Carbon dioxide should not be used as the inert gas shield.

**13.20** This method eliminates the formation of oxide within the pipe, leaving a clean bore. Some slight burnishing may occasionally be observed on sectioned joints. Purging is still required to remove the internal shield gas and the other particulate matter not associated with the brazing operation.

**13.21** Copper joints to brass or gunmetal fittings will require the use of flux, with subsequent cleaning to remove the flux residues and oxide deposits.

**13.22** Heating of the joint for brazing should be carried out with oxygen/acetylene or acetylene, hydrogen, liquid petroleum gas/ambient air torches. Additional heating may be required for some fittings, for example by means of a second torch.

**13.23** In order to maintain the pipeline cleanliness and prevent formation of verdigris after completion, it will be necessary to maintain the completed system charged with medical air until the installation is finally commissioned. On larger projects completed sections of pipeline should be similarly protected.

**13.24** The techniques recommended cover all copper-to-copper joints and all copper-to-brass/gunmetal/bronze joints in an MGPS, and are explained in more detail below.

**13.25** By agreement between the health facility management and the pipeline contractor, the use of a purge gas may be waived on joints such as break-ins to old pipeline systems, where pipe joints will not have been made in accordance with this new technique.

**13.26** This new technique should be used on all medical gas pipeline services. The method is recommended for use in other non-clinical departments in hospitals, such as pathology laboratories.

### Jointing methods

**13.27** Mechanical (threaded or flanged) joints may be made where pipelines are connected to items such as valves and control equipment. For vacuum pipelines of 76 mm diameter and above, screwed or flanged compression fittings may be used. Mechanical joints should not be used elsewhere for general pipework installation.

*A procedure for the removal of flux residues and copper oxides is given in paragraph 13.40. Any alternative process which is equally effective may, however, be substituted*

Where brass/gunmetal/bronze fittings form part of an installation, they should be supplied to site individually packed and complete with copper pipe tails brazed to them so that these fittings can be joined to the pipeline installation by fluxless brazing. Because of this requirement, it will be necessary for a copper-to-copper brazed joint to be made adjacent to these fittings, for example in a wall adjacent to a terminal unit or a valve

### 13.28 Brazing copper to brass/gunmetal/bronze

- a. brazed joints should be made using a copper-silver-zinc brazing alloy to BS 1845 and an appropriate flux;
- b. the flux residues and copper oxides created by this process should be chemically removed and if necessary the complete assembly must be cleaned and degreased for oxygen service;
- c. no flux should be used for making joints on site. Joints must be carried out under controlled conditions off-site and sub-assemblies delivered to site.

### 13.29 Brazing copper-to-copper joints:

- a. brazed joints should be made using a silver-copper-phosphorus brazing alloy to BS 1845. No flux should be used;
- b. brazing should be carried out using oxygen-free nitrogen as an internal inert gas shield, to prevent the formation of oxides on the inside of the pipes and fittings;
- c. when brazing, ensure adequate protection of adjacent pipe runs to avoid oxidation.

## Pipe preparation

**13.30** Pipe ends should be cut square with the pipe axis, using sharp wheel-cutters and cleaned of any cuttings or loose burrs. Expanded joints should be made using the appropriate tools and dies. Only where the cut pipe has either deformation or a burr which significantly restricts the flow of gas will deburring be necessary.

## Use of N<sub>2</sub> internal inert gas shield

### Application

*It is recommended that the pipeline to be brazed should first be flushed to remove the air. This may be followed during the brazing operation by a continuous or intermittent flow as necessary, to prevent the ingress of air. Pipe ends may be capped if desired to direct the flow of N<sub>2</sub> into sections of the pipe or pipes to be brazed. Particular attention should be given to the gas shielding of T-joint fittings*

*If necessary, the oxygen content of the ambient air should be monitored*

**13.31** Oxygen-free nitrogen should be supplied to the inside of the pre-assembled, unbrazed, pipework through a pressure regulator and flow controller or flow regulating device.

**13.32** If necessary, the purge gas should be fed from two ends of a T-joint. Care should also be taken to ensure that other pipelines in close proximity to the one being brazed do not oxidise due to heat transfer.

### Safety

**13.33** If working for prolonged periods in very confined spaces, precautions must be taken to avoid excessive build up of nitrogen, by ventilating the space or by piping the shield gas safely out of the space.

### Control of cylinders

**13.34** The contractor and the site engineer must keep a record of nitrogen cylinders held on a site. Nitrogen cylinders should be accounted for and

### 13.0 Pipeline installation

removed from the site at the end of the contract, and must not become mixed up with medical gas cylinders.

#### *Other installation processes*

**13.35** Oxygen-free nitrogen should also be used internally on pipework – as in paragraph 13.31 – whenever annealing or hot forming of pipework is carried out.

#### **Inspection of joints**

**13.36** Joints brazed should be inspected in accordance with the following procedure:

- a. before pressure testing, the site engineer should identify a number of fittings to be cut out for examination in order to establish the quality of the finished joint. The exact number to be cut out will vary with the size of the installation, but as a guide a ratio of one fitting per 200 installations should be cut out. In any event, a minimum of two and not normally more than five fittings should be cut out for examination;
- b. the fittings cut out should be cut open (quartered longitudinally) and examined. If unacceptable joints are found, adjacent fittings should be cut out until the extent of any faulty workmanship has been established. The joints should be assessed in accordance with paragraphs 13.37 and 13.38;
- c. the pipeline should be made good;
- d. the pipe should be fully inserted up to the shoulder of the fitting.

#### *Internal cleanliness*

**13.37** The tube and fitting should be internally clean and free from oxides and particulate matter. Some heat burnishing may be apparent and is acceptable.

#### *Penetration*

**13.38** Penetration of brazing alloy:

- a. due to tolerances of the capillary space on these pipes and fittings, full penetration of the brazing alloy may not occur and is not necessary;
- b. the minimum penetration at any point on the joint must be three times the wall thickness of the tube or 3 mm, whichever is greater.

#### **Capping**

**13.39** Sections of pipeline should be capped as soon as they are completed, to prevent the ingress of air.

#### **Removal of flux residues and oxides**

**13.40** The residue of flux and oxide resulting from the brazing of copper-to-brass/gunmetal/bronze fittings must be removed before components are delivered to site. The following procedure should be used, or alternatively, one which is no less effective may be substituted.

**13.41** Allow joints to cool naturally to room temperature or at least to a temperature at which they can be handled. This is specifically for gunmetal fittings which, if cooled (or quenched) from the brazing temperature by dipping in cold water, could crack.

**13.42** The flux residues should be removed by immersion in hot water and brushing with stainless steel type wire brushes.

**13.43** The oxides formed should be removed by immersing in a 5–10% sulphuric acid solution at 65°C (nominal) to which 25–50 g/litre of potassium dichromate has been added. The component should then be thoroughly rinsed in hot water at 80°C (nominal); this should result in a bright, clean component.

**13.44** The fitting should be degreased if necessary and bagged.

### Purging with the working gas

**13.45** Purging should be carried out strictly in accordance with the procedures given in 'Validation and verification'.

### Pipe supports

**13.46** The pipeline should be adequately supported at sufficient intervals in accordance with Table 21 to prevent sagging or distortion. Supports for surface mounted pipework should provide clearance to permit painting of the surface. Where it is essential for pipes to cross electric cables or conduit, they should be supported at intervals on either side of the crossing to prevent them from touching the cables or conduit. Supports should be of suitable material or suitably treated to minimise corrosion and prevent electrolytic reaction between pipes and supports.

*Table 21* Intervals between copper pipe supports

| Outside dia mm | Maximum interval for vertical runs m | Maximum interval for horizontal runs m |
|----------------|--------------------------------------|----------------------------------------|
| 12             | 1.2                                  | 1.0                                    |
| 15             | 1.8                                  | 1.2                                    |
| 22             | 2.4                                  | 1.8                                    |
| 28             | 2.4                                  | 1.8                                    |
| 35             | 3.0                                  | 2.4                                    |
| 42             | 3.0                                  | 2.4                                    |
| 54             | 3.0                                  | 2.7                                    |
| 76             | 3.6                                  | 3.0                                    |

**13.47** Pipelines need not be laid with falls. In the case of vacuum, the sub-atmospheric pressure will result in the evaporation of any moisture entering the system. It is possible, however, for vacuum jars to overflow and thus for systems to require flushing through.

**13.48** The connection from individual vacuum terminal units into the main unit should be taken from the top of the pipeline to avoid flooding other vertical pipe drops during flushing. Each vacuum main riser should be provided with a double valve arrangement to permit drainage when the system is under vacuum: one of the valves should be lockable in the closed position. No other sloping or drainage arrangements are required.

**13.49** Pipelines need further protection in certain circumstances as follows:

- a. where pipes pass through walls, partitions or floors they should be fitted with sleeves of copper pipes which conform to BS 2871 and be provided with appropriate wall or ceiling plates;
- b. in radiodiagnostic procedure rooms etc, radio frequency (RF) screening by means of extended sleeves will be necessary. The advice of the equipment manufacturer should be sought;
- c. corrosion of pipes can occur where they are in contact with timber treated with fire-resistant or flame-retardant compounds, for example some timber used for roof trusses and floor joists.

**13.50** This contact should be avoided by the use of impermeable non-metallic materials in the area where contact may occur. PVC spacers or adhesive PVC tape may be used for this purpose. If spacers are used they should not be liable to drop out due to shrinkage or subsequent movement of the pipe or timber.

**13.51** Such precautions are not required where untreated timber is used or where the treated timber is effectively sealed with paint or varnish before the pipes are fixed to it.

### Identification of pipelines

**13.52** Pipelines should be identified in accordance with BS 1710 and colour banding for the pipelines should be used outside of the plantroom. Colour band identification (see Figure 19) should be applied near to valves, junctions, walls etc. Each gas should be identified in 6 mm letters. Self-adhesive plastic labels of approved manufacture may be used for this purpose. A band 150 mm wide is usually adequate. All colour-coded tapes applied by the pipe manufacturers should be removed before the systems are identified, in accordance with this paragraph.

**13.53** Care should be taken to maintain pipeline identification when periodical re-painting is undertaken. The direction of flow should be indicated.

## Pipeline fittings

### General

**13.54** Pipeline fittings which may be attached to an MGPS include various types of terminal unit, valves, area valve service units (AVSUs), and other components such as emergency inlet ports.

### Ceiling pendant fittings – rigid, multi-purpose type

**13.55** The construction should provide segregation of functional extra low voltage (FELV) electrical services by means of flexible partitions or conduit as appropriate. Access to "live" components should be via panels which are removable by means of tools only.

**13.56** When these fittings include flexible connecting assemblies for the gas supply, the method of attachment to rigid pipework or terminal units should be by means of the appropriate non-interchangeable screw thread (NIST) connector in accordance with BS 5682:1984.



**Notes:**

1. Base colours as follows:

A = yellow ochre 08C35

B = light blue 20E51

2. All colours in this diagram should be taken to be representative rather than exactly accurate.

3. Reference numbers in colour codes conform to BS 4800:1972

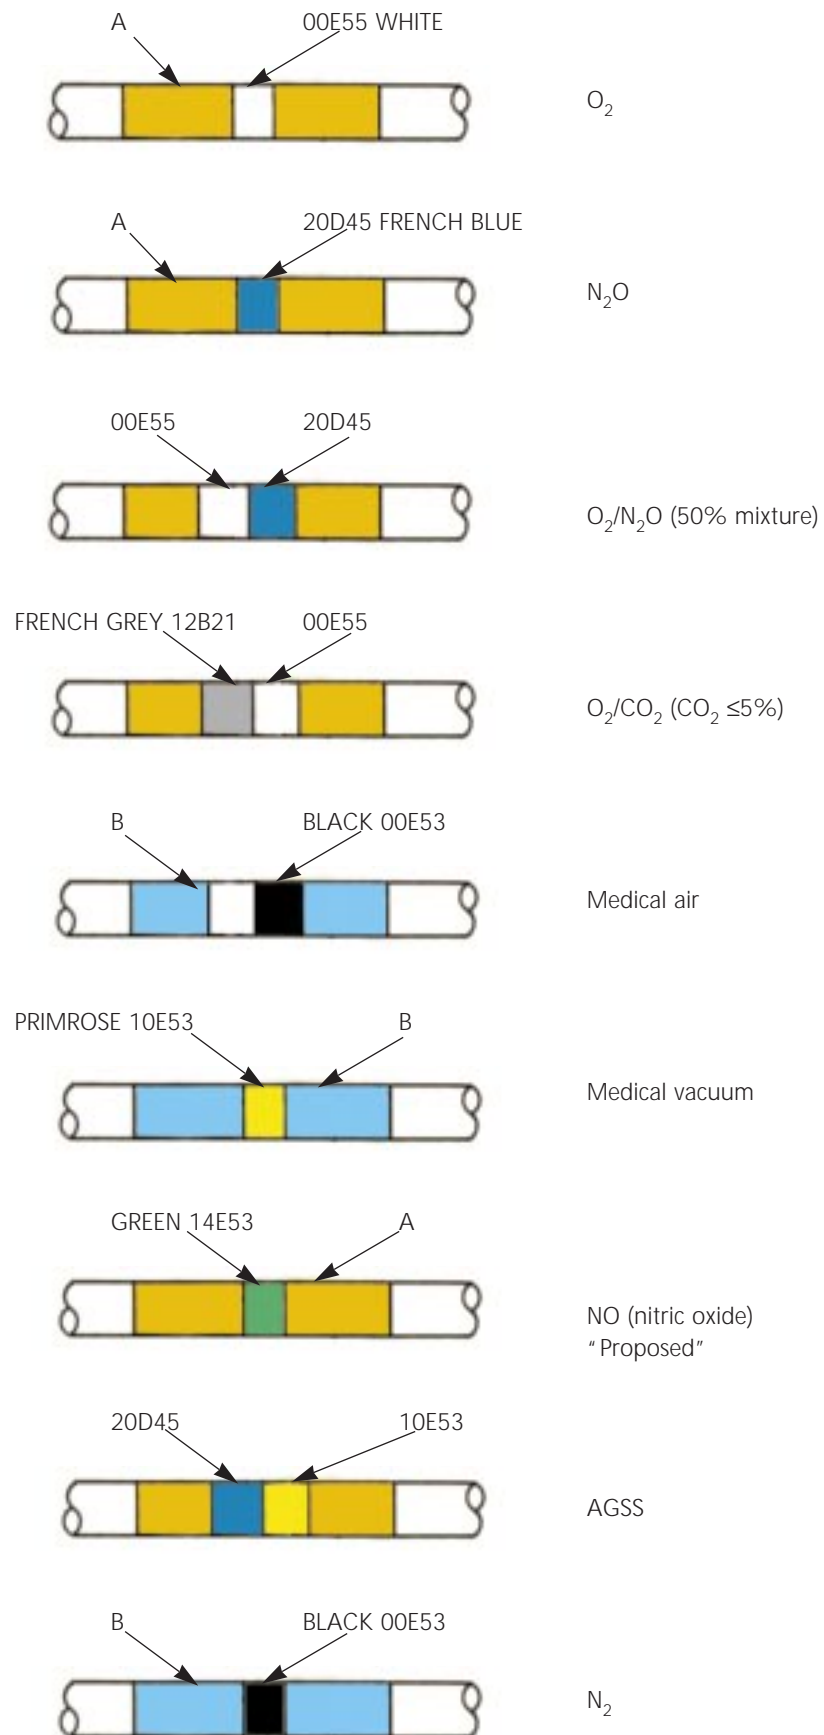

Figure 19 Colour code identification for medical gas terminal outlets and pipe installations

### 13.0 Pipeline installation

**13.57** The fittings should be provided with adequate venting to allow escape of gas in the event of rupture of one or all of the medical gas services.

**13.58** The recommended height for rigid pendants is 2000 mm above finished floor level (FFL).

**13.59** The use of medical air for pneumatically actuated pendants is covered in Chapter 4.

**13.60** The manufacturer should confirm that these requirements are met prior to the installation of the equipment; this should be demonstrated during the validation and verification procedures.

#### Flexible pendant fitting

**13.61** These should comply with the requirements of BS 5682, as amended. In particular, all loose assemblies should be provided with appropriate NIST connectors.

#### Bed-head trunking/walling system

**13.62** These fittings should generally be in accordance with HTM 2015 'Bedhead services'. Separate compartments should be provided for electrical services, nurse call/radio etc and medical gas pipelines.

**13.63** Flexible connecting assemblies used within the fitting should comply with BS 5682, as amended.

**13.64** The medical gas compartment should be provided with ventilation by means of louvres, slots, etc to prevent the accumulation of any gas in the event of rupture of the medical gas pipeline services.

**13.65** In some departments it is becoming fashionable to install medical gas services within concealed recesses (or behind decorative panels, paintings, etc) to engender a more domestic appearance. In such cases, adequate provision must be made for ventilation, and the required space to permit connection and disconnection of equipment should be considered. The covers should be clearly labelled to indicate that medical gas equipment is installed within/behind.

**13.66** There are two possible alternative installation procedures:

- a. the connection between the pipeline and the trunking should be considered as first and second fix, with the trunking being pre-piped and certificated as complying with HTM 2022;
- b. the connection between the trunking and the pipework should be as paragraph 13.56.

#### Shut-off valves

**13.67** All valves should be of the lever ball type, which open and close with a 90° turn.

### Provision of valves

**13.68** Valves should be provided on items of plant and sources of supply to permit servicing and isolation of the main components and to connect the sources of supply to the pipeline distribution system. Lockable line valves should be provided:

- a. at the pipeline entry to a building;
- b. at the pipeline exit from a building;
- c. on branches, risers etc at the connection to the main pipeline.

**13.69** All valves located outside the plantrooms, wherever possible, should be provided with lockable, ventilated enclosures.

### Area valve service units (AVSUs)

**13.70** AVSUs are provided for user access in an emergency (or for maintenance purposes). They comprise a ball valve installed within an enclosure, with lockable door permitting locking with valve "open" or "closed". **The means of emergency operation should not introduce the possibility of injury.** The AVSU should provide means for physically isolating and blanking off the pipeline both upstream and downstream of the valve. The means of isolation should be readily operable, blank both the pipeline and the valve port and be visible when deployed. In the event of leakage of the blanking device, gas must be freely vented and must not be able to enter either the valve port or the pipeline section blanked.

**13.71** In an emergency, the user must be able to gain access in order to operate the isolating valves quickly and simply without the need for a key. There are several methods of providing such emergency access, for example break-glass panels, plastic push-out inserts etc. Whichever method is used must be safe and secure, but must not provide a risk of injury to the user. The method of emergency access must be obvious and clearly labelled, and its use must be evident.

**13.72** The appropriate NIST connector bodies, with self-sealing check-valves, captive plugs or caps, should be provided upstream and downstream of the blanking plate. AVSUs may be designed for a single pipeline service or multi-services. Where the cover bears the name of the gas service it should be gas-specific. In the case of multi-service AVSUs, the design should be such as to permit the attachment of a hose assembly to any one or more of the NIST connectors while the cover is locked. The AVSU may include provision for pressure gauges/pressure switches by means of separate bosses.

**13.73** The enclosure should have adequate ventilation to prevent the accumulation of gas in the event of a leak. Pipe entries and other penetrations should be sealed to prevent gas escape by routes other than the vents or openings into the user space. The enclosure should be designed to facilitate sealing of these entries on site.

**13.74** AVSUs should be clearly labelled to indicate their function and the areas/beds etc served. Emergency access should not compromise the labelling.

## Provision of AVSUs

### General

**13.75** AVSUs should be provided as follows:

- a. for general wards – one valve near the entrance to the ward;
- b. for intensive therapy units, recovery, special care baby units, etc – one valve at the entrance plus additional valves to control pipelines serving between four and eight beds. The latter should not control more than half the outlets in any one department;
- c. for operating departments – one valve at the entrance to the department plus valves to control each suite, that is, operating room, anaesthetic room and (if provided) the plaster room;
- d. all other departments – one valve at entry;
- e. for vacuum service, AVSUs should be provided to facilitate maintenance and isolation of specific departments.

**13.76** For other departments, such as day-care surgery units, this may result in unrealistically high numbers of AVSUs. As a guide, where there are fewer than ten terminal units, a minimum of one AVSU should be provided at the entrance to the department.

**13.77** If possible, in critical care areas such as ITUs and neonatal units, each AVSU should control only half the total number of terminal units in each space. Where two sets of terminal units are provided to each bed/treatment space, consideration should be given to using one AVSU for one of each pair of sets.

**13.78** These would be isolated by two separate AVSUs. In this case, the NIST connectors should be clearly labelled showing which terminal units or pneumatic function are served, and which AVSU isolates each NIST.

### Labelling

**13.79** All valves should be clearly labelled to identify the areas/departments served. In addition, AVSUs should be labelled to identify the individual rooms etc controlled. All valves and AVSUs should have flow direction arrows.

**13.80** The AVSUs should be similarly labelled, indicating which terminal units and which pneumatic function is isolated by each AVSU.

### Pressure sensors

**13.81** Pressure sensors to provide the alarm function will need to be fitted to pipeline distribution systems. In all cases they should be installed in a location which is adequately ventilated and having access for maintenance. They may be incorporated within AVSUs. Pressure sensors should be factory set and be a replacement item. They should be connected to the pipeline by means of a minimum leak connector.

### Pressure gauges

**13.82** Pressure gauges are not usually required outside the plantroom of an MGPS. If provided, however, they should similarly be installed in an

*Where pneumatically actuated pendant fittings are used, the medical air supply is typically used for the power source. In this case, closure of one of the medical air AVSUs may inactivate the pneumatic function, as well as isolating half the terminal units. The fact that the AVSU controls the pneumatic operation of such devices should be clearly labelled on both the AVSU and the relevant NIST connector in the pendant fitting. The more sophisticated pendants may have three NIST connectors for medical air – one for the pneumatic function and two for terminal units*

adequately ventilated location. They may be incorporated within AVSUs, theatre supply fittings etc. They should be installed with isolation cocks.

### Test points

**13.83** Each supply plant, that is, liquid facility, manifold, compressor, pressure swing adsorber (PSA) and blending plant, should be provided with a test point comprising lockable valve and terminal unit for test purposes. This should be within the plantroom or enclosure, and be sited immediately upstream of the distribution pipeline isolating valve.

### Emergency inlet port

**13.84** Medical oxygen and 400 kPa medical air systems should be provided with an emergency inlet port to the pipeline distribution system. This should be located downstream from the main source of supply, to permit connection of a temporary supply plant. The emergency inlet should comprise a lockable valve and blanked, gas-specific connecting port, and should incorporate a non-return valve.

**13.85** An emergency inlet port is not required for 700 kPa surgical air systems.

### Line pressure alarms and safety valves

**13.86** The purpose of the line pressure alarm is to warn users that the nominal line operating pressure is out of limits and that gas mixtures, whether supplied by a blender/mixer or by an anaesthetic machine, may deviate from the clinical desired proportion. Local action can then be taken to adjust the mixture, or when an anaesthetic machine is in use the reserve cylinders can be brought into use. The low-pressure alarm for nitrous oxide/oxygen mixture supply pipelines will warn of possible demand valve regulator failure so that a portable cylinder can be made available. The high/low pressure limits have been set to accommodate the design of most types of anaesthetic equipment where differential pressure or low pressure may affect performance.

**13.87** The line pressure safety valve provides limited safety from differential pressure effects since the pressure at which maximum discharge occurs will result in a differential much greater than that for which the anaesthetic equipment has been designed. They are therefore strictly system protection devices.

**13.88** The commissioning of medical gas pipeline line pressure regulators, warning and alarm systems, and pressure settings is crucial to performance of anaesthetic equipment and patient safety; once commissioned, medical gas pipelines are subject to strict permit-to-work procedures, and decommissioning a complete system is highly disruptive to patient care and introduces considerable risk.

**13.89** Statutory obligations under the Pressure Systems and Transportable Gas Containers Regulations require the periodic testing of pressure safety devices. It is not appropriate to test a medical gas pipeline system by either raising the line pressure regulator setting or manually unseating the relief valve. Such action could result in failure of anaesthetic equipment, and in the event of failure of the safety valve to re-seat, considerable gas loss and further hazard. Medical gas pipeline line distribution systems should be provided with a pressure relief device downstream of the line pressure regulator connected by means of a three-way cock so that the safety device can be exchanged for a "certificated" replacement in accordance with the frequency required by the Regulations.

# 14.0 Accommodation

## Design and construction of plantrooms

### Location of plantrooms

**14.1** Cylinder gas/liquid supply systems should not be located in the same room as medical air compressors, PSA systems or vacuum plants.

**14.2** Manifold rooms, emergency/reserve manifold rooms for pressure swing adsorber (PSA) systems, vacuum insulated evaporator (VIE) installations and medical compressed air systems should be located near to the medical gas cylinder storage area.

**14.3** All manifolds, including the emergency reserve manifolds, may be located within the same room. Manifold rooms should be located on an external wall(s) to facilitate ventilation, which will be required at high and low level.

**14.4** The emergency/reserve manifold for liquid oxygen systems has traditionally been located within the VIE compound, but it is preferable to site the manifold separately. For new installations, these emergency/reserve manifolds should be located separately.

**14.5** It is preferable to site the manifold for medical air 700 kPa systems within the operating department. However, the gas used is at high flows, but the overall consumption is modest and therefore there may be little disadvantage in sites remote from the cylinder store. (The number of cylinders stored in buildings should be kept to a minimum.)

**14.6** The medical air 700 kPa manifold room may be used as the ready-use store for a small number of spare cylinders to be used on anaesthetic machines.

### Access

**14.7** Access to manifold rooms should be from the open air, not from corridors or other rooms.

**14.8** Normal commercial lorry access is suitable for gas cylinder delivery vehicles, but consideration should be given to the provision of a raised level loading bay when this is justified economically on the basis of cylinder handling costs.

**14.9** Two doors should preferably be provided in a manifold room. One should be large enough to facilitate cylinder handling and must be in an outside wall. Exits must be free of all obstructions. Doors must open outwards. All doors must normally be locked to prevent unauthorised access, but should be provided with means of entry and exit in an emergency, for example by a combination of a key in a break-glass box and a push-bar arrangement on the inside.

**14.10** The internal walls, including any internal doors of the manifold room, should be suitable non-combustible 2-hour fire-resistant material as defined in BS 476 Parts 4 and 8. Internal doors should be avoided where practicable. Heat detectors should be provided.

## Construction and layout of manifold rooms

**14.11** The manifold room will contain the manifolds as well as cylinder racks holding sufficient spare cylinders to replace one bank of each manifold and the emergency/reserve manifold. Further replacement cylinders should be supplied from the non-flammable medical gas cylinder store. The size of the manifold room should therefore be determined from the size of the equipment, as advised by the manufacturer. Adequate space should also be allowed for cylinder handling.

**14.12** A typical automatic manifold with two "duty" and two standby cylinders is 1.8 m long and 0.6 m deep. One extra cylinder on each bank adds approximately 0.5 m to the overall length, so that a 2 x 6 manifold is approximately 4 m long.

**14.13** All medical gas manifolds may be installed in the same room. Additional floor area should be provided to accommodate separate storage racks for each gas. The racks should be designed along the lines of those on the manifolds, but the stored cylinders may be closer together. Racks should conform to BS1319. Wooden racks should not be used. With the exception of N<sub>2</sub>O/O<sub>2</sub> mixtures, under no circumstances should rooms contain gas cylinders other than those appropriate to their manifolds.

## Heating and ventilation of plantrooms

**14.14** Ventilation louvres should be provided at both high and low levels for all manifold rooms, to allow circulation of air. As a guide, well-separated openings equivalent to at least 1.5% of the total area of the walls and room should be provided. For example, given a manifold room 5.0 x 4.0 x 2.4 m with a total area of the walls and ceiling of 63.2 m<sup>2</sup>, the total free open area for ventilation required is 1 m<sup>2</sup>.

**14.15** The aspirated air inlets should, if possible, be located externally, and should vent to a safe area away from ventilation plant intakes etc. However, they should not be taken as an alternative to the provision of an adequate air supply for cooling purposes.

**14.16** All vents should be vermin/bird-proof.

**14.17** PSA and medical air compressors liberate, under maximum flow conditions, considerable heat. Moreover, these plants aspirate air for breathing purposes. Generous natural ventilation should be provided. The ambient temperature of manifold rooms and plantrooms should be maintained within the range of 10°C to 40°C. The ventilation rates should ensure that the plantroom temperature does not exceed ambient temperature by more than 10°C.

**14.18** In some cases it may be necessary to provide mechanical ventilation for plantrooms, with supply air directed towards the compressor air intakes and inter-/after-coolers. It should rarely be necessary to provide cooling.

## 14.0 Accommodation

**14.19** Manifold rooms may be used to store small numbers of nitrous oxide/oxygen cylinders intended for portable use; these are taken from the main cylinder store for the purpose of temperature equilibration, before being delivered to wards etc.

**14.20** To achieve temperature equilibration, additional heating may be required; the natural ventilation must not be reduced. Where such heating is provided, it should be preferably by indirect means, for example steam, hot water or warm air. Naked flames and exposed electric elements should not be used, and excessive surface temperature should be avoided. If necessary, cylinders should be protected from excessive heat. Any primary heat source should be located in a safe position, preferably remote from the manifold room.

**14.21** Additional space may be provided in such manifolds for holding cylinders used on trolleys (in addition to spare cylinders intended for use with the pipeline system) to allow temperature equilibration displays as appropriate. Cylinder recognition charts, conforming to BS 349:1973 or BS 1319, should be prominently displayed as appropriate.

## Lighting

**14.22** Manifold rooms should be provided with lighting to an illumination level of 150 lux (15 lumens/sq ft) by means of bulkhead lighting fittings to IP 54 BS 5490:1977. Plantrooms other than manifold rooms should be provided with a lighting level of 200 lux (20 lumens/sq ft).

## Noise control

**14.23** Plantrooms should be designed and constructed to ensure the satisfactory control of noise emission. The effect of two vacuum pumps or compressors running together, in the case of duplex installations, and three or more in the case of multiplex installations, will be to increase the free-field noise level outside the plantroom by 5 dBA for each additional pump or compressor operation over and above the specified limits. Consideration should be given to providing acoustic enclosures to reduce the free-field noise levels in noise-sensitive areas adjacent to plantrooms.

**14.24** Acoustic enclosure and/or plantroom design must not inhibit normal cooling functions or maintenance activities.

**14.25** Free-field noise levels should be given to the architect to assist in acoustic design of the plantrooms.

**14.26** The discharge from some vacuum pumps may require silencing, although it should be noted that rotary pump exhausts are not likely to require silencers.

**14.27** Compressors and pumps should be mounted on properly selected anti-vibration mounting, where necessary, to minimise transfer of noise and vibration to the structure of the building.

**14.28** All pipework and electrical conduits connected to the plant should be fitted with flexible connectors where necessary, to prevent the transmission of noise and vibration along the pipelines and conduits.



# 15.0 Validation and verification

## General

**15.1** This section covers the validation and verification and filling for use of MGPS. The requirements for anaesthetic scavenging systems are also covered in paragraphs 15.118–15.139.

**15.2** The test procedures and methods are also included in this chapter.

**15.3** The objective of testing and commissioning is to ensure that all the necessary safety and performance requirements of the MGPS will be met. Testing and commissioning procedures will be required for new installations, additions to existing installations and modifications to existing installations. The scope of work will dictate the specific test programme required. This is described in more detail in paragraphs 15.14–15.16.

**15.4** This chapter describes the tests required and the test methods. Tests are listed in Appendix A and the associated forms in Appendix B.

**15.5** For extensions comprising fewer than 20 brazed joints, all the tests may be performed with the working gas – the pressure test being replaced by a leak test. An extension comprising more connections would, however, be deemed to be a small installation, requiring all the appropriate tests to be carried out, up to the final connection (and leak test). For the purpose of ascertaining the number of joints, a straight coupling comprises two joints and a tee comprises three joints.

**15.6** For modifications and extensions (except for the final connection), all work should be performed with an inert gas shield, to avoid widespread oxide contamination and, thus, it is essential that a physical break is employed between the pipeline being modified and any "in-use" systems and prohibition labels are affixed to outlets in areas occupied by patients and that all the identity, purity and quality tests are carried out. On a minor modification, from which existing terminal units would not be removed, it may not be practical to carry out a pressure test on the new carcass and therefore this could be deleted. All other tests would be required, including the pipeline pressure test.

**15.7** The programme of tests is divided into three phases:

- a. tests and checks on the pipeline carcass;
- b. tests and commissioning of the complete pipeline system (with terminal units installed) for safety, performance and particulate contamination using test gas;
- c. filling of the systems with specific gases, quality tests and proof of the identity of those specific gases prior to use for patient care.

**15.8** The basic rationale for the tests is depicted as a decision tree in Figure 20.

## 15.0 Validation and verification

**15.9** The personnel and test equipment needed for these tests are listed together with the test requirements in Table 22. The particulate contamination of all pipeline systems may be checked using dry, oil-free medical air to establish that the pipeline has been constructed correctly and is not contaminated. Successful completion of the commissioning tests normally indicates the end of the installation contract. The systems may then be left under pressure, filled with medical compressed air, for an indefinite period. Responsibility for the system during this period needs to be clearly defined in the contract.

*Systems that are not to be taken immediately into use should be filled with medical air and left under pressure. Nitric oxide systems should be filled with nitrogen. Because of the possibility of oil contamination, systems other than medical air supplied from compressors should be filled with medical air from cylinders*

Table 22 Personnel and test equipment requirements

| Paragraph | Test                                  | Personnel                   | Equipment                                                                       |
|-----------|---------------------------------------|-----------------------------|---------------------------------------------------------------------------------|
| 5         | Pipeline carcass                      | CSO & CR                    |                                                                                 |
| 5.1       | Labelling and marking                 | CSO & CR                    |                                                                                 |
| 5.2       | Sleeving and supports                 | CSO & CR                    | Pressure device                                                                 |
| 5.3       | Leakage                               | CSO & CR                    |                                                                                 |
| 5.7       | Cross-connection                      | CSO & CR                    |                                                                                 |
| 6         | Pipeline system                       |                             |                                                                                 |
| 6.1       | Leakage                               | CSO, CR & AP                | Pressure device                                                                 |
| 6.7       | Area valve service units              | CSO, CR & AP                | Pressure device                                                                 |
| 6.10      | Cross-connection                      | CSO, CR & AP                |                                                                                 |
| 6.15      | Flow and pressure drop                | CSO, CR & AP                | Special test device                                                             |
| 6.16      | Mechanical function                   | CSO, CR & AP                | Test probes                                                                     |
| 6.17      | Gas specificity                       | CSO, CR & AP                |                                                                                 |
| 6.18      | NIST connectors                       | CSO, CR & AP                |                                                                                 |
| 6.20      | System performance                    | CSO, CR & AP                | Metered leaks and special test device                                           |
| 6.24      | Supply systems                        | CSO, CR & AP                |                                                                                 |
| 6.26      | Pressure safety valves                | CSO, CR & AP                |                                                                                 |
| 6.28      | Warning systems                       | CSO, CR & AP                |                                                                                 |
| 11.1      | As-fitted drawings                    | CSO & AP                    |                                                                                 |
| 7 & 8     | Purging and filling                   | CSO & CR                    |                                                                                 |
| 9         | Particulate contamination and quality | CSO, CR, QC & AP            | Particulate matter tester, oil, water, CO and CO <sub>2</sub> measuring devices |
| 10        | Gas identification                    | CR, QC & AP                 | O <sub>2</sub> analyser and N <sub>2</sub> O meter                              |
| 13        | Anaesthetic gas scavenging systems    | CR & AP                     | AGS test device and induced flow test device                                    |
| Key       | CR Contractor's representative        | AP Authorised person (MGPS) |                                                                                 |
|           | CSO Contract supervising officer      | QC Quality controller       |                                                                                 |

**15.10** Tests for cross-connection are made on the complete pipeline system. These tests are of fundamental importance to the safety of the pipeline systems.

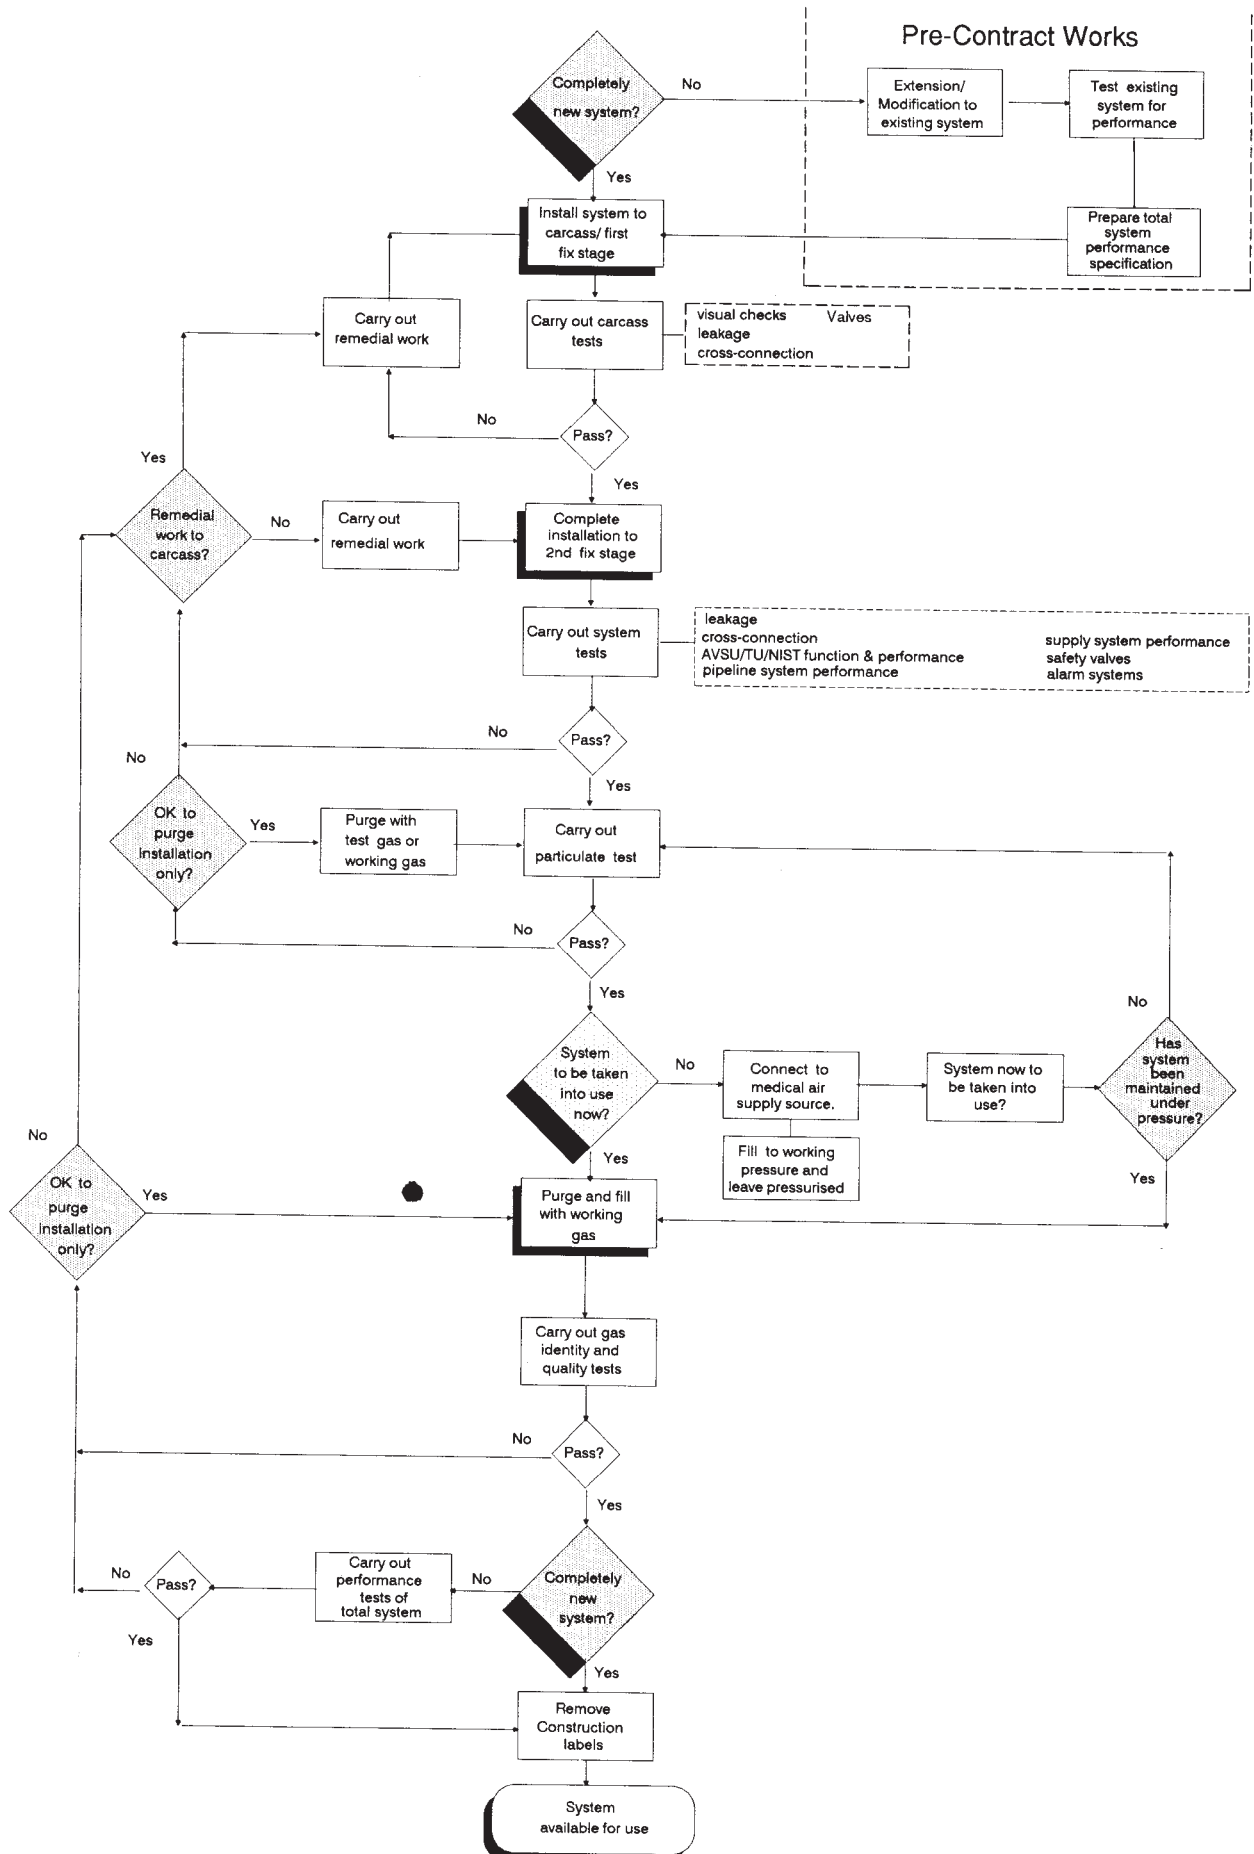

Figure 20 Decision tree for testing and commissioning

## 15.0 Validation and verification

**15.11** All supply systems and their major components should have certificates (as specified in Model Engineering Specification C11) which show that they meet the design requirements of the pipeline system.

**15.12** Validation and verification should only be undertaken by contractors who are registered to BS EN ISO 9000 with their scope of registration defined to include commissioning.

*The concept of the existing Quality Assurance BSI Schedule QAS 3720.1/206 is currently under review. Further guidance will be given when appropriate*

**15.13** All relevant tests should be carried out by the persons listed in Table 22 and witnessed by the appropriate persons, who must record the results of the tests in writing for the hospital authority.

## Summary of tests

### Tests and checks on the pipeline carcass

**15.14** The following tests must be carried out after installation of the pipeline carcass but before concealment:

- a. visual check of pipeline labelling, marking, sleeving and support;
- b. leakage test;
- c. documented tests for cross-connection;
- d. valve tests for closure, zoning and leakage.

### Tests on the pipeline system

**15.15** The following tests must be carried out after complete installation of the pipeline system:

- a. tests for leakage on each medical gas pipeline system;
- b. tests of area valve service units (AVSUs) for closure, zoning and correct control of the terminal units involved;
- c. tests for cross-connection, flow, pressure drop, mechanical function and gas specificity of the terminal units and for cross-connection, mechanical function and gas specificity of NIST connectors;
- d. performance tests of the pipeline system;
- e. functional tests of all supply systems;
- f. inspection of safety valve certification;
- g. tests of warning systems;
- h. tests for particulate contamination. These tests may be carried out with either medical air or after purging and filling with the specified gas. If the system is not to be taken into immediate use, the tests for particulate contamination should be carried out with medical air and the system then left under pressure.

### Tests before use

**15.16** The following tests must be carried out after purging and filling with the working gas:

- a. test for particulate contamination;

- b. test for gas identities;
- c. tests for gas quality;
- d. checks of the labelling of AVSUs (to include gas label, flow direction arrow and area served).

## General requirements for testing

### General

**15.17** A physical break must always be used between existing pipeline systems, and any in-use system and any system filled with purge gas. This can be achieved either by deploying the spades/blanking plates incorporated in area valve service units (AVSUs) or by cutting and capping the pipe. Full-size disc "danger do not use" prohibition labels should be fitted to outlets taken out of service.

**15.18** The tests described in this document must all be carried out, in the order given, for new installations. It may be necessary to modify the test programme slightly for modifications or extensions to existing systems. Care must be taken, however, to ensure that the basic principles are followed. Paragraph 15.29 gives details of the tests required for modifications/ extensions to existing systems.

**15.19** Pressure testing for leakage is carried out in two stages for pressure gas systems. The first pressure tests are applied to the pipeline carcass, the second to the whole installation, which may include terminal units and medical supply units as appropriate. There is a third stage, which applies to vacuum systems only. The whole installation is tested with the vacuum plant in operation.

**15.20** Purging and testing must be carried out with clean, oil-free, dry air or nitrogen, except for those tests where medical air or the specific working gas is prescribed. All test gases must meet the particulate contamination requirements of paragraph 15.95. The shield gas may be used for the leakage test on the pipeline carcass described in paragraph 15.39. Medical air from the compressor plant may be used to test medical air and vacuum systems, provided the quality tests (including those for particulate contamination), as discussed in paragraphs 15.88–15.105, have been carried out. Cylinders must always be used as the source of test gas for oxygen, nitrous oxide, oxygen/carbon dioxide and oxygen/ nitrous oxide systems in order to prevent the possibility of contamination with oil. Argon should be used for testing nitric oxide systems.

*The terminal units should all be marked "Do not use" before modifications have started*

**15.21** Before the pipeline system tests are carried out, every terminal unit in a system under test must be labelled to indicate that the system is under test and that it should not be used.

**15.22** Terminal units are required to be supplied with such labelling affixed. Special connectors will be needed to introduce test gas into different pipeline systems. These must be of distinctive construction and permanently labelled with their function and the contractor's name. The location of special connectors on the site must be recorded and should be subject to routine inspection under a planned preventative maintenance (PPM) system.

**15.23** The results of all tests must be part of the permanent records of the hospital and should show details of the services and areas tested. The test

## 15.0 Validation and verification

procedures are outlined in paragraph 15.140. Examples of the appropriate forms are given in Appendix A. All signatories are entitled to copies of the test forms. The procedure for filing and retaining these forms should be included in the local operational policy.

**15.24** During all pressure tests, the system under test must be physically disconnected from the source of pressure whilst the test is in progress. In the case of compressed air systems, the pressure at the plant must be reduced below pipeline distribution pressure.

**15.25** All errors found during testing must be rectified and the relevant systems must be retested as appropriate before the records are signed.

**15.26** The contractor must provide all forms, labour, materials, instruments and equipment required to carry out the tests described in paragraphs 15.37–15.85. This must include all cylinders of test gas together with medical gas probes and the test device described in Appendix C.

**15.27** The quality controller (QC) should provide the test equipment specified in Appendices E, F and G.

**15.28** The sequence of tests given in paragraphs 15.44–15.78 and 15.86–15.110 must be maintained. Where a test is repeated one system at a time (for example cross-connection), the order in which the systems are tested may be decided on-site by consultation between the contract supervising officer and the contractor's representative.

### Modifications, extensions or repairs to existing systems

**15.29** Where modifications, extensions or repairs to existing systems are carried out, the tests and the sequence of tests summarised in paragraph 15.14 should be followed as far as possible. In any case, great care must be taken to ensure that the principles of the tests are followed; for example, leakage tests should always be carried out before cross-connection tests.

**15.30** The permit-to-work system should always be followed whenever any work is carried out on an existing system. The authorised person (MGPS) should act on behalf of the management and would not, therefore, be a member of the contractor's staff.

**15.31** Whenever modifications or extensions are carried out, it is always advisable to test both the existing system and the new system separately, before the break-in is made. Existing systems should be tested to determine their performance and to identify any potential limitations which may arise as a result of modifications. Where there is any doubt as to the cleanliness, it is obviously desirable that tests for particulate contamination should also be carried out on the existing system prior to any break-in. It is the responsibility of the hospital authority to ensure that these tests are carried out prior to the design phase of any modifications or extensions. It is the responsibility of the management to ensure that remedial work is carried out on an existing system.

**15.32** The tests for particulate contamination on any extension or modification should only be carried out with medical air.

**15.33** The exact tests carried out will obviously depend on the nature of the modification/extension. A specification should be prepared for the performance of the completed system. This specification should be as close as possible to that given in Table 23.

Table 23 Validation and verification: pressure during pipeline system tests

| Medical gas                                                      | Pipeline distribution pressure kPa                                                | Terminal unit test flow l/min (see 'Design considerations' for design flows) | Max pressure drop in pipeline at system design flow kPa | Min pressure (this may vary by +/-5% between max flow and static condition) kPa | Plant pressure kPa          |
|------------------------------------------------------------------|-----------------------------------------------------------------------------------|------------------------------------------------------------------------------|---------------------------------------------------------|---------------------------------------------------------------------------------|-----------------------------|
| O <sub>2</sub><br>N <sub>2</sub> O, NO<br>Medical air<br>400 kPa | 400                                                                               | 10–100<br>15<br>20–80                                                        | 40                                                      | 370                                                                             | 430–490                     |
| O <sub>2</sub> /N <sub>2</sub> O mixtures                        | 400                                                                               | 20<br>275<br>inhalationary gasps                                             | 90                                                      | 310                                                                             | 430–490                     |
| Surgical air<br>700 kPa                                          | 770                                                                               | 350                                                                          | 110*                                                    | 700 kPa at 350 l/min (max 900 kPa at no flow condition)                         | see 'Design considerations' |
| Vacuum                                                           | 53.3 kPa (400 mm Hg) below standard atmospheric pressure of 101.3 kPa (760 mm Hg) | 40                                                                           | 26.6 kPa (200 mm Hg)                                    | 40 kPa (300 mm Hg)                                                              |                             |

\* To the back of the local regulator or terminal unit.

**15.34** Existing compressed air systems will have been designed to provide 250 l/min at the terminal unit in accordance with HTM 22 (1978). It may not be possible for such systems to provide 350 litres l/min, as specified in Table 4 Chapter 4, and there may be circumstances where this would be acceptable. This should be clearly stated in the specification for the performance of the completed system. However, every effort should be made to comply with the performance and quality specification given here.

**15.35** It may be necessary to repeat some of the system performance tests such as flow and pressure drop, at selected terminal units on the completed system to demonstrate satisfactory performance (see paragraph 15.33).

**15.36** The break-in to the existing system should be carried out with an inert gas shield where practical, and a physical break must always be made between the existing in-use system. A leak test must be carried out using a suitable leak detection fluid on this joint at working pressure, and the joint purged with the working gas. Fluxless brazing should, of course, be used. 'Danger – do not use' labels should be affixed to outlets taken out of service in areas occupied by patients.

## Requirements for pipeline carcass tests

### Labelling and marking

**15.37** A visual check must be made on each pipeline system to ensure that the pipelines are labelled in accordance with the contract specification, and that the terminal unit base blocks are marked in accordance with BS 5682:1984.

### Sleeving and supports

**15.38** A visual check must be made on each pipeline system to ensure that the pipelines are sleeved and supported in accordance with the contract specification.

### Leakage

**15.39** The aim of this test is to establish that there is no leakage from the piped medical gas systems. This is best shown by the use of sensitive pressure-measuring equipment. With suitable equipment it is possible to make such measurements during a relatively short test period, which may be more cost-effective and will minimise errors which arise as a result of temperature change.

**15.40** The pressure drop during a test period of 2–24 hours must be less than 0.025% per hour. The pressure drop must be corrected for variations due to temperature (see Appendix B). Systems must be tested at a working pressure of 18.0 bar g for medical compressed air systems for surgical use, 10.0 bar g for all other compressed medical gas systems and 7.0 bar g for vacuum systems. This test should be carried out on the pipeline carcass with the area valve service units or other valves open.

*Within large volume systems it may be preferable to test small sections of the system individually*

**15.41** During pressure testing, any safety valves and pressure-sensing devices installed may be removed and the connections blanked off.

**15.42** It is not desirable to cross-link the carcasses to form a single system for the purpose of the carcass leakage test.

### Cross-connection

**15.43** The contractor must test for cross-connection and document the results of these tests.

## Requirements for pipeline system tests

### Leakage from total compressed medical gas systems

**15.44** There must be no links between the MGPS.

**15.45** This test must be carried out on the pipeline system with the supply system disconnected, so that gas cannot be supplied to the pipeline from the supply system. For the purpose of this test, the supply system extends to the last valve(s) detailed on the appropriate schematic drawing. This point should be identified on the contract drawings.



**15.46** A leakage of not more than 0.02 l/hour is permitted from each terminal unit.

**15.47** The system must be tested at pipeline distribution pressure. After a period under test, a pressure drop may be observed in the system. The pressure drop must not exceed the value calculated from the formula:

$$p = \frac{2n \cdot h}{V}$$

where:

p = gauge pressure drop, in kPa

n = number of terminal units

h = number of hours on test (between 2 and 24)

V = volumetric capacity, in litres, of the pipeline system at atmospheric pressure.

**15.48** The following points should be noted:

- a. with large volume systems, it may be preferable to test small sections of the system individually;
- b. the pressure change must be corrected for variations due to temperature (see Appendix B);
- c. where leakage is in excess of the specified limits, the source of the leak must be identified and the fault rectified;
- d. the volume of the system may be measured by the procedure given in Appendix H.

#### **Leakage into total vacuum systems**

**15.49** Prior to testing, the vacuum plant should be operated to remove any condensation in the system. With the system at pipeline distribution pressure and with the source isolated, the pressure increase in the pipeline must not exceed 10 kPa after 1 hour. There is no additional allowance for temperature correction in this test.

#### **Closure of area valve service units**

**15.50** For pressurised systems the system upstream of the closed valve under test must be at pipeline distribution pressure and the downstream line should be evacuated by using an opened flow meter or probe. This upstream pressure must be recorded and there should be no pressure decrease upstream from the valve over a period of 15 minutes.

**15.51** In the event of loss of pressure it will be necessary to identify the faulty AVSU. This may be accomplished by introducing a pressure to about 1 bar g after AVSUs, and checking for increased pressure.

**15.52** For vacuum systems, the systems on the supply plant side of the closed valve must be at pipeline distribution pressure and the terminal unit side should be at atmospheric pressure. This upstream pressure must be recorded and there should be no loss of vacuum upstream of the valve over a period of time, typically 30 minutes.

## 15.0 Validation and verification

**15.53** In the event of loss of vacuum, it will be necessary to identify the faulty AVSU. This may be accomplished by introducing a vacuum of about 200 mm Hg after AVSUs and checking for any increase in vacuum.

### Zoning of area valve service units and terminal unit identification

**15.54** With pressure in one system at a time, a check of all AVSUs must be made to ensure that each AVSU in the pipeline under pressure is labelled and controls only those terminal units intended in the design (see opposite). The labelling of each terminal unit must be checked to ensure that it is correct and is in accordance with BS 5682:1984 (1992).

**15.55** The AVSU under test should be closed; all other AVSUs should be open.

**15.56** For pressurised systems, the system upstream of the valve should be at pipeline distribution pressure and the downstream section should be de-pressurised to about 1 bar. All downstream terminal units should be checked for pressure and the results recorded. During the test, the recorded pressure of 1 bar, or thereabouts, will fall depending upon the number of terminal units controlled, and it may be necessary to 'top up' the pressure to complete the test.

**15.57** For vacuum systems, the downstream vacuum should be about 200 mm Hg (27 kPa) and all downstream terminal units should be checked for increase in vacuum. (As for pressurised systems it may be necessary to "top up" the vacuum to complete the test.)

*Where pneumatically-activated pendant fittings are installed, a check should be made to ensure that the power source of medical air has been taken from the correct AVSU*

*A downstream pressure or vacuum is required to positively identify terminal units controlled, and to discount the affect of a leaking terminal unit if the pressure were zero*

*Similar valve closure and zoning tests should be performed for main service valves*

### Cross-connection

**15.58** Each system in turn, including vacuum, must be checked as follows to ensure that there is no cross-connection between pipelines for different gases and vacuum.

**15.59** Cross-connection tests should not commence until all installations are complete. All AVSUs and any other valve in the distribution system must be open on all systems. The system under test must be at pipeline distribution pressure and all other systems must be at atmospheric pressure. A check must be made to ensure that gas flows through every terminal unit of the system under test, one at a time, and that there is no gas flow through any other terminal units.

**15.60** The test must be repeated on each system in turn, including vacuum, preferably at one session.

**15.61** There must be no cross-connection.

**15.62** This test must be repeated in full if any subsequent modifications are made to the pipeline system.

### Flow and pressure drop at terminal units

**15.63** The pressure drop must not exceed the values in Table 1 of BS 5682:1984 (1992), as amended (but see also Table 23 for surgical air systems and oxygen/carbon dioxide) when each terminal unit is tested one at a time, using the appropriate device described in Appendix C, at its specified flow with the pipeline at pipeline distribution pressure.

### Mechanical function of terminal units

*This test requires that the terminal unit is complete with its fascia in place*

**15.64** It must be demonstrated for each terminal unit that the appropriate gas-specific probe can be inserted, captured and released, and that the probe does not swivel in any horizontally-mounted terminal units. In vertically-mounted terminal units the probe should be capable of twisting without undue force.

### Gas specificity of terminal units

**15.65** For each terminal unit, it must be demonstrated that gas is released only when the correct probe is inserted, that no probe is captured, and that no gas is released when probes for all other gases are inserted. All probes used for this test must be certified to BS 5682:1984 (1992).

### NIST connectors

**15.66** For each NIST connector, it must be demonstrated that normal flow of gas is achieved only when the correct NIST probe is inserted and mechanical connection made. The NIST probes for all other gases must not make mechanical connection.

*It is not necessary to carry out these tests on factory connected NISTs which are incorporated into certified assemblies*

**15.67** It must be demonstrated (except for vacuum) for each NIST connector that the self sealing device substantially reduces the flow of gas when the nut and nipple is removed.

### Performance tests of the pipeline system

**15.68** Each pipeline system in turn should be operated at the specified design flow by introducing a number of calibrated metered leaks. It must then be verified at representative terminal units throughout the installation, that at the normal test flow for these terminal units, the pressure does not fall below the values given in Table 23.

**15.69** This test requires that:

- a. the metered leaks are stamped to show the jet size;
- b. the flow of test gas at the test pressure is determined for each jet size used;
- c. the design flow is corrected for the density of the test gas;
- d. the leaks must be placed where the downstream flow could be at least equal to the total flow through the leak. These leaks may be placed at terminal units, AVSUs or NIST connectors as appropriate. This is not likely to be the end of the branch;
- e. approximately 20–25% of the terminal units distributed throughout the system must be tested with the device described in Appendix C, to measure the pressure at the specified flow.

**15.70** For large vacuum systems, the specified design flow may be set by the procedure given in Appendix G. With the system running at the design flow, it must then be verified, at representative terminal units throughout the installation, that at the normal flow for these terminal units (40 l/min) the pressure drop does not exceed the value given in Table 23. It may be necessary to incorporate an additional uncalibrated leak at the plant test point to stabilise the vacuum level to 450 mm Hg at the plant/pipeline interface.

## 15.0 Validation and verification

**15.71** For mixtures of oxygen/nitrous oxide (50% v/v), each terminal unit must be tested to ensure that a peak flow of 275 l/min for 5 seconds can be achieved with a minimum pressure of 310 kPa (3.1 bar g). This is the minimum pressure for satisfactory operation of demand valve regulators. This is in addition to the total system flow test.

### Functional tests of supply systems

**15.72** For all systems, prior to carrying out any tests, check that the provision is in accordance with Table 2.

**15.73** All supply systems must be tested for normal and emergency operation, according to the manufacturers' manuals and contract specifications. Check lists must be written for the appropriate functions of all the items of plant in the installation. Particular attention should be paid to the following:

- a. manifold installations – test gas may be used for the following checks:
  - (i) check that each half of all automatic manifolds operate at the specified pressures. A standard gas cylinder must be used to pressurise the manifold and a controlled leak allows observation of the operating pressure;
  - (ii) check the operation of all pressure regulating valves and non return valves;
  - (iii) check the operation of any heaters, where fitted;
  - (iv) check that the manifold can deliver design flow rate;
  - (v) check the operation of the emergency manifold;
  - (vi) check that all plant operates with start-up in the correct sequence when switched to the stand-by power source;
  - (vii) check the operation of the warning and alarm system and the plant indicator unit;
- b. liquid oxygen installations:
  - (i) check that the heater unit, where fitted, vapouriser pressure controls, relief valves, pressure controls and warning devices operate according to specification;
  - (ii) check the function of the changeover to the reserve manifold;
  - (iii) check that operation is at maximum specified flow;
  - (iv) check the operation of the warning and alarm system and the plant indicator unit;
- c. compressed air plants:
  - (i) check for the correct rotation and current at full load;
  - (ii) check for excessive vibration and noise;
  - (iii) check all automatic operations;
  - (iv) check the changeover to reserve manifold;
  - (v) check the function of automatic drains and by pass valves;
  - (vi) check the operation of all plant at its maximum continuous rating;
  - (vii) check that the power consumption of the compressed air plant is in accordance with the contract specification;
  - (viii) check the accuracy of all pressure gauges and thermometers;
  - (ix) check that the insulation resistance and effectiveness of earthing of all electrical items are in accordance with IEE regulations – extant edition;

*The appropriate alarm functions may be tested at the same time*

- (x) check that all plant operates with start up in the correct sequence when switched to the standby power source;
  - (xi) check that the position of the air intake to the compressors is in accordance with the contract specification;
  - (xii) check the operation of the warning and alarm system and the plant indicator unit;
- d. vacuum plants:
- (i) check for the correct rotation and current at full load;
  - (ii) check for excessive vibration and noise;
  - (iii) check all automatic operations;
  - (iv) check the operation of non-return valves and sensors;
  - (v) check the function of drains and bypass valves;
  - (vi) check the operation of all plant at its maximum continuous rating;
  - (vii) check that the power consumption of the vacuum plant is in accordance with the contract specification;
  - (viii) check the accuracy of all vacuum gauges and thermometers;
  - (ix) check that the insulation resistance and effectiveness of earthing of all electrical items are in accordance with IEE regulations – extant edition;
  - (x) check that all plant operates with start-up in the correct sequence when switched to the stand-by power source;
  - (xi) check that the position of the vacuum discharge is in accordance with the contract specifications;
- e. oxygen concentrator plant:
- (i) check the operation of cycling systems for each sieve pair;
  - (ii) check the control system to regenerate the sieves in relation to pipeline demand;
  - (iii) check the operation of automatic changeover to standby molecular sieve in the event of failure of duty sieve, low O<sub>2</sub> concentration, dryness or pressure;
  - (iv) check the operation and calibration of sensors for O<sub>2</sub> concentration, dryness and pressure, and all pressure gauges and thermometers;
  - (v) check the operation of all pressure-regulating valves and non-return valves;
  - (vi) check the activation of appropriate fault indicator and associated volt-free contacts, and that the sub-assembly remains in this mode of operation until the fault has been rectified;
  - (vii) check the operation of each dryer sub-assembly function indicator;
  - (viii) check operation in the event of a power failure, to ensure that all valves close in a fail-safe mode and to ensure the operation of the emergency manifold;
  - (ix) carry out the same checks for each compressor as for compressed air plant;
  - (x) check the operation of all plant at its maximum continuous rating and check that the design specification for flow, pressure and quality is achieved;
  - (xi) check the operation of the warning and alarm system and the plant indicator unit.

### Pressure safety valves

**15.74** Check that the specified pressure safety valves, line valves and non-return valves have been fitted.

**15.75** Verify that the valves are certified to operate in accordance with the contract specification and conform to BS 6759:Part 2: 1984.

### Warning systems

**15.76** The operation of warning systems should be tested in all operating and emergency conditions for one function at a time and one system at a time. Particular attention should be paid to the following:

- a. that all warning systems operate within the specified tolerance limits at all operating parameters and fault conditions, and can be seen and heard as specified in Table 19;
- b. that systems react correctly following return to normal status;
- c. that all panels and switches are correctly marked;
- d. that all warning functions on all stations operate correctly;
- e. that the warning system will operate from the essential supply standby power source;
- f. that all systems are labelled to show the areas they serve, or as detailed in the contract specifications.

**15.77** The following tests should also be carried out:

- a. for central alarm panels, check that the operation of the mute switch cancels the audible alarm and converts the flashing signals to steady;
- b. for repeater alarm panels, check that the mute switch cancels the audible alarm and that the flashing signals are converted to steady only when the central alarm panel;
- c. for area alarm panels, check that the operation of the mute switch cancels the audible only;
- d. check power failure operates red "system fault" indicator and audible;
- e. check that a contact line fault operates the "system fault" indicator, the alarm indicator and the audible;
- f. check communication/wiring faults between central and repeater alarms operate the "system fault" indicator and audible;
- g. check audible reinstatement for each alarm panel;
- h. check that the audible can be continuously muted via operation of the internal push-button for gas service alarm condition only;
- j. check for correct identification of each gas service on alarm panels and "departmental" or plant specifying labels.

### Verification of as-fitted drawings

**15.78** The "as-fitted" drawings should be checked to ensure that all variations from the contract drawings have been recorded.

## Filling with medical air

*With the exception of medical compressed air systems supplied from compressors, medical compressed air cylinders should be used. For nitric oxide systems, oxygen-free nitrogen cylinders should be used*

**15.79** An indefinite time may elapse after completion of the MGPS construction contract before the MGPS are to be used. The construction contract may be written in the expectation that this will happen. In such circumstances the contract should require that the particulate contamination and odour tests specified in paragraphs 15.95 and 15.105 are carried out as an interim measure, using medical air as the test gas. Satisfactory completion of these particulate contamination and odour tests may then signify the completion of the construction contract.

**15.80** It is the responsibility of the client to ensure that proper provision is made in a specific contract for the maintenance, integrity and any special connectors which may be required during this interim period.

**15.81** All MGPS should be left filled with medical air at pipeline distribution pressure until they are filled with the specific working gas shortly before use. The medical vacuum pipeline need not be maintained under vacuum.

**15.82** Provision should be made for regular running and maintenance of all supply plant during such an interim period.

**15.83** Details of the work carried out, as well as records of the system pressures, should be recorded. This information is required in order to demonstrate that the systems have been satisfactorily maintained under pressure during this interim period. Tests for particulate contamination should be carried out after the systems are filled with the specific gas. The extent of the tests is at the discretion of the quality controller (QC).

**15.84** Check that a "Danger – do not use" label is affixed to each terminal unit.

*Special connectors and cylinders may be required to maintain the systems under pressure*

**15.85** When the construction contract has finished, the contractor should record the removal of all special connectors and cylinders from site.

## Purging and filling with specific gases

**15.86** Each pipeline system must be purged with the specific working gas shortly before use. The following conditions should apply:

- a. all sources of test gas must be disconnected;
- b. all special connectors must be removed from site;
- c. each pipeline system must be at atmospheric pressure with all AVSUs open;
- d. each system must be filled to pipeline distribution pressure with the specific gas from the supply system;
- e. with the supply system on, each terminal unit must be purged at a known flow with a volume of gas at least equal to the volume of the pipeline being tested;
- f. all oxygen, nitric oxide, oxygen/carbon dioxide mixtures, nitrous oxide, and nitrous oxide/oxygen mixtures released during the purging process must be disposed to a safe place.

**15.87** Purging is not necessary for vacuum systems.

## Quality of compressed medical gas systems

### General

**15.88** The objective of these tests is to establish whether the pipeline has been contaminated during construction or modification. With the exception of the particulate contamination and odour tests, these tests must be carried out after the systems have been filled with the specific working gas. Oxygen, oxygen/carbon dioxide, nitric oxide, and nitrogen must be vented to a safe place. These tests are not required on a vacuum system.

**15.89** These test procedures are based on existing practice. The particulate contamination test is subjective in that it requires the quality controller (QC) to make a judgement on whether or not particles are visible on the filter.

**15.90** The oil, water, carbon monoxide and carbon dioxide tests are intended to be carried out with detector tubes. These tubes give a quantitative response and are not intended for re-use. The tubes should be agent-specific since non-agent-specific (poly-test) tubes can respond to various agents such as volatile inorganic compounds, giving misleading results. A dewpoint meter could be used for water content.

**15.91** These tests must be carried out on a representative sample of terminal units in each system at the discretion of the QC. The sample must include as a minimum the most distant terminal unit on each branch, normally the first terminal unit to be tested. Depending on the results of the tests, the QC should decide the number and location of additional terminal units to be tested.

**15.92** These tests are summarised in Table 24.

**15.93** Medical compressed air (and PSA) plant should be tested for quality before the pipeline distribution system is filled with the working gas.

**15.94** Quality tests should be carried out on the plant as well as on the pipeline distribution system.

### Particulate matter

**15.95** The test for particulate matter should be carried out at every terminal unit. It can be carried out either after completion of the construction phase or after the system has been filled with the specified gas. If, after construction, the system is to be left filled with medical air, the particulate test would be completed first. Once the system is filled with working gas, it would not normally be necessary to repeat the test at every terminal unit. The actual number of terminal units sampled is at the discretion of the QC. It would, however, be necessary to repeat the test in full where there is insufficient evidence to show that a system has been satisfactorily maintained under pressure when left filled with medical air for the interim period.

**15.96** The most distant terminal unit on each branch must be tested with a membrane filter at a flow not less than 150 l/min for 30 seconds. The filter must be free from visible particles when viewed in good light. A suitable test device is described in Appendix D. All other terminal units should be purged.



Table 24 Summary for quality tests for medical gases pipeline systems

| Test            | Gas                                                                           | Paragraph | Specification                                                                             | Test result                                                             |
|-----------------|-------------------------------------------------------------------------------|-----------|-------------------------------------------------------------------------------------------|-------------------------------------------------------------------------|
| Particulates    | All                                                                           | 15.95     | Practically free from visible particles in 75 l sample                                    | Practically free from visible particles on membrane filter <sup>1</sup> |
| Pipeline odour  | Oxygen and medical air and surgical air                                       | 15.105    | None <sup>4</sup>                                                                         | No odour                                                                |
| Water           | All                                                                           | 15.99     | 115 VPM <sup>5</sup><br>0.095 mg/l (equivalent to dewpoint -40°C at atmospheric pressure) | H <sub>2</sub> O detection tube satisfactory <sup>2</sup>               |
| Oil             | Medical air 400 kPa<br>Surgical air 700 kPa<br>Oxygen supplied from PSA plant | 15.97     | Oil content droplet and mist<br>Oil vapour <5 ppm <sup>3</sup>                            | Oil detection tube satisfactory                                         |
| CO              | Medical air 400 kPa<br>Surgical air 700 kPa<br>Oxygen supplied from PSA plant | 15.101    | 5 ppm v/v                                                                                 | Gas detection tube satisfactory                                         |
| CO <sub>2</sub> | Medical air 400 kPa<br>Surgical air 700 kPa<br>Oxygen supplied from PSA plant | 15.102    | <500 ppm v/v<br><br><300 ppm v/v                                                          | Gas detection tube satisfactory                                         |

## NOTES:

- Typically 40 µm is limit of resolution of human eye.
- Hydrometer may be used instead of H<sub>2</sub>O detector tubes.
- A large sample is required to detect these levels (at least 2 hours running).
- Odour threshold for particulate material is approximately 0.3 mg/m<sup>3</sup>.
- The current moisture specification for oxygen is 60 vpm, the proposed Ph Eur for O<sub>2</sub>/air and N<sub>2</sub>O is 50 vpm.

Testing on-site cannot be as accurate as testing under manufacturing conditions.

## Oil

**15.97** A representative sample of all terminal units on medical compressed air systems and oxygen concentrator systems supplied by compressor plant must be checked to ensure freedom from odour or oil.

**15.98** The most distant terminal unit on the index pipe run and plant test point must be tested for the total oil content. Oil may be present as liquid, aerosol or vapour, and an appropriate test device is described in Appendix E. The total oil content should be in accordance with Table 24. This test must also be carried out at a test point on the compressor system and oxygen concentrator system. It is desirable to carry out this test at a plant test point before any pipeline system is supplied by that plant, to prevent contamination of the pipeline distribution system. Care should be taken in selecting the test point, to ensure a representative sample.

*The compressor plant must only be used to supply medical air systems and vacuum systems for test purposes*

## Water

**15.99** This test is intended to identify contamination of the pipeline system by moisture. It should not be confused with the test for compressor plant dryer performance, although it may indicate a failure in the dryer system.

**15.100** The plant test point and a representative sample of terminal units distributed throughout the pipeline systems should be tested for total water content. The water content must not exceed 115 vpm. The typical water content of medical gas cylinders is normally below 5 vpm. This may be measured using the appropriate test device described in Appendix E.

## Carbon monoxide

**15.101** The most distant terminal units on each branch of a medical air pipeline system supplied from a compressor plant and PSA systems must be tested for carbon monoxide, although it would not normally be necessary to test more than five terminal units. The concentration of carbon monoxide should not exceed 5 ppm v/v. This may be measured at up to five terminal units in each system using the appropriate test devices described in Appendix E.

## Carbon dioxide

**15.102** The most distant terminal unit on each branch of a medical air pipeline system supplied from a compressor or an oxygen concentrated plant must be tested for carbon dioxide. The concentration of carbon dioxide must not exceed 500 ppm v/v for oxygen from an oxygen concentrator plant.

**15.103** Carbon dioxide must not be used as the inert gas shield during brazing.

## Nitrogen

**15.104** Nitrogen is used as the inert gas shield, and all terminal units, should be tested to ensure that the systems have been adequately purged. For oxygen systems and nitrous oxide/oxygen, an oxygen analyser must be used to ensure that the oxygen concentration is not less than that given in Tables 24 or 25. For nitrous oxide systems, nitrogen has been used as the inert gas, and an instrument based on thermal conductivity, or an infra-red meter, must be used to check that the system has been adequately purged at every terminal unit.

*Certain plastic materials currently in use will release small quantities of volatile organic matter into the gas stream throughout their life, for example, flexible hose assemblies, pendant assemblies, etc. Research has indicated that the quantities released are of no toxicological significance*

## Pipeline odour

**15.105** This test must be carried out as the final test. A representative sample of terminal units on all systems must be checked to ensure that there is no taste or odour. This check is performed to ensure that no contamination has occurred, for example by oil or sealants, burned plastic pipe caps, etc. This test must not be carried out on nitrous oxide or nitrous oxide/oxygen systems unless filled with medical air test gas. On nitric oxide systems, this test can be performed using nitrogen from the purge cylinder.

## Gas identification

**15.106** The identity of the gas must be tested at every terminal on all MGPS. This would include all new terminal units, whether on a new installation or a modification or extension, and a representative sample of terminal units on an existing system which may have been affected by the work. All systems must have been filled with the specific gas according to paragraph 15.86. During the test, do not connect any system to medical equipment.

**15.107** The composition of all compressed gases must be positively identified. This can be accomplished using an oxygen analyser for oxygen, nitrous oxide/oxygen and air, and a thermal conductivity or infra-red meter for nitrous oxide.

**15.108** A sampling procedure must be used which will minimise pollution from nitric oxide, nitrous oxide and nitrous oxide/oxygen mixture.

**15.109** The nominal gas concentration at the specific terminal units is given in Table 25.

**15.110** Vacuum must be identified by observation of suction at the terminal units.

Table 25 Gas concentrations for identification purposes

| Medical gas                             | Oxygen concentration<br>% v/v | Nitrous oxide concentration<br>% v/v |
|-----------------------------------------|-------------------------------|--------------------------------------|
| O <sub>2</sub>                          | minimum 99.0                  | n/a                                  |
| Medical and surgical air                | 21.0 +/- 1.0                  | n/a                                  |
| N <sub>2</sub> O                        | 0                             | minimum 98.0                         |
| N <sub>2</sub> O/O <sub>2</sub> 50%/50% | 50.0 +/- 2.0                  | 50.0 +/- 2.0                         |

### Notes:

1. The tolerance of the measuring instrument should be allowed in addition.
2. For oxygen concentrator plant (PSA) supplied system, the minimum concentration must be 94% oxygen.
3. For bulk liquid/liquid or gaseous cylinder supplied systems, this must be in accordance with the European Pharmacopoeia (Ph Eur) requirements.

NOTE: 93% was the suggested EP figure when considering specification.

## Requirements before a MGPS is taken into use

### General

**15.111** Before a system is used, the appropriate persons must certify in writing that the tests and procedures required in paragraphs 15.37–15.78 and 15.86–15.110 have been completed, and that all systems comply with the requirements. This must include certification that all drawings and manuals required by the contract have been supplied and “as-fitted” drawings are correct.

**15.112** It must be verified that the AVSUs and the warning systems have been labelled in accordance with the contract specification and are labelled (or will be labelled prior to formal use) in a secure manner to state where they serve.

**15.113** All certificates must be dated and signed by the appropriate witnesses, by the contract supervising officer and by the representative of the contractor.

**15.114** For modifications or extensions to existing systems, the performance tests for flow and pressure drop (as described in paragraph 15.68) must be carried out on the completed system using the working gas. If the performance is in accordance with the specification prepared (as described in paragraphs 15.29–15.36), the system may be taken into use, provided that all the other tests have been satisfactorily completed.

### Operational policy

**15.115** A procedure must be available in accordance with the ‘Operational management’ volume of this HTM, and must ensure continuity of supply of cylinders and bulk liquid. This will incorporate a procedure for recording delivery, handling and storage of full and empty cylinders, with an indication of who is responsible for these activities. The composition of the cylinder contents must be certified by the supplier. All deliveries of bulk liquid oxygen should be tested for conformance to the product licence specification before despatch by the supplier, and should be supplied with a certificate indicating compliance.

### Cylinder storage and handling

**15.116** There should be recorded visual checks for correct labelling, including batch numbers. See the ‘Operational management’ volume of this HTM.

### Removal of construction labels

**15.117** When all tests have been completed satisfactorily, the construction labels which were fixed to the terminal units should be removed on the authority of the authorised person (MGPS).

## Anaesthetic gas scavenging systems

### General

**15.118** BS 6834:1992 specifies the tests to be carried out on AGS systems which comply with the British Standard. The tests specified are performance tests, to ensure that the system performs in accordance with the design specification and safety tests, to ensure that the safety criteria are met.

**15.119** Systems which do not comply with the British Standard should also be tested to ascertain their performance and to ensure that the criteria for patient safety can be achieved.

**15.120** The tests for performance and safety criteria are described in this Chapter. It is recommended that all AGSS are tested at commissioning and that the tests are repeated yearly, or more frequently if there is reason to suspect that the performance of the system is not satisfactory. Monitoring staff exposure to anaesthetic gases is recommended in the 'Operational management' volume of this HTM in order to comply with the requirements of COSHH. The results of such monitoring will identify potential inadequacies in the AGSS, which should then be tested to ascertain its performance.

**15.121** The responsibility for the tests should be clearly identified at the contract stage for new installations, in the same way as for the MGPS. In general, the contractor should carry out the tests, which should be witnessed by the authorised person (MGPS). It is unlikely that each health authority or trust can justify the purchase of the specialist equipment required to carry out these tests, unless there are a significant number of AGSS installed on the site.

**15.122** The general requirements set out in this volume for validation and verification should be followed, including tests for cross-connection and mechanical function of terminal units.

## Performance tests: disposal systems

### Powered device

**15.123** All equipment should be tested to ensure that it performs satisfactorily during continuous operation under full load for one hour.

**15.124** All electrically-powered equipment should be tested as follows:

- a. check for correct rotation;
- b. check the current through the powered device at full load;
- c. check the insulation resistance and the effectiveness of the earthing of all electrical items.

### Pipework/ductwork installation

**15.125** The procedure set out in Appendix D ,Section D2 of BS 6834:1987 should be followed.

**15.126** Where the AGSS is installed with other medical gases systems, it should be included in the cross-connection tests as specified in paragraph 15.58.

**Performance testing**

**15.127** The disposal system should be tested to ensure that it meets the following requirements, regardless of the number of terminal units on the system:

*Developments in oxygen standards may result in reduced extract flows for systems in the future*

| Pressure drop | Extraction flow   |
|---------------|-------------------|
| 1 kPa         | Maximum 130 l/min |
| 4 kPa         | Minimum 80 l/min  |

**15.128** These criteria should be met, regardless of the number of receiving systems connected to the disposal system.

**15.129** The test should be carried out as described in Appendix K of BS 6834:1987 (1992). Where a disposal system is designed to operate with more than one terminal unit, that is, more than one receiving system in use simultaneously, the test should demonstrate that the above criteria can be met under all conditions, that is, with one or all of the terminal units in use.

**15.130** The test device should therefore first be inserted into each terminal unit in turn, with all other terminal units closed. The test should be repeated with all other terminal units open and in use. Ideally, this would mean inserting a test device into every terminal unit on the system and checking at each terminal unit in turn that the required criteria are met. In practice, it is sufficient to connect a receiving system conforming to BS 6834:1987 (1992) to every terminal unit, and to then check each terminal unit in turn.

**15.131** The contractor should provide a certificate giving details of the performance of the system.

**Receiving system**

**15.132** The induced flow into the receiving system by the disposal system should be tested at every receiving system, to ensure that the induced flow does not exceed 0.5 l/min.

**15.133** The procedure and the test equipment required are described in Appendix F of BS 6834:1987 (1992).

**Performance efficiency**

**15.134** The method of testing for performance is set out in Appendix G of BS 6834:1987 (1992). The specific challenge gas flow, comprising a mixture of oxygen and nitrous oxide, is introduced into the receiving system to simulate the gas flow from the breathing circuit via the transfer system.

**15.135** It should not be possible to detect any nitrous oxide in the vicinity of the receiving system when the system is challenged in this way.

**15.136** This test is difficult to carry out under site conditions, since it is not easy to set up the correct challenge flow and the ambient conditions will affect the results. This test should be carried out under laboratory conditions by the manufacturer of the receiving system and a certificate should be provided in accordance with BS 6834:1987 (1992).

**15.137** It may be necessary to carry out an assessment of the performance of an existing scavenging system which does not comply with BS 6834:1987 (1992). In this case, the test procedure set out in the British Standard should be followed as far as possible.

**15.138** The operation of flow indicators, power-on indicators and alarm systems should also be checked.

**15.139** For the purposes of diversity it may be assumed that in any operating department, one receiving system for each operating suite is in use at any time.

## Methods and procedures for validation and verification of medical gas pipeline systems

### General

**15.140** The procedure given here is an example only. Other procedures may be used, but validation of the test method should be documented.

**15.141** The sequence of tests in this procedure is important and should be followed.

**15.142** The general requirements of paragraphs 15.17–15.36 must be observed.

**15.143** All tests will need to be planned and carried out by the appropriate persons.

**15.144** Forward planning will be necessary to ensure that the necessary persons and test equipment will be available.

**15.145** Summaries of the tests required on the pipeline carcass and on the total pipeline system are given in Tables 22 and 23.

### Labelling and marking

**15.146** Inspect each pipeline carcass to ensure that the pipelines and the AVSUs are labelled in accordance with the contract specification, and BS 1710 and that the terminal unit base blocks are marked in accordance with BS 5682:1984.

**15.147** If the labelling and marking is correct, complete Form B1.

### Sleeving and supports

**15.148** Inspect each pipeline carcass to ensure that the pipelines are sleeved and supported in accordance with the contract specification.

**15.149** If the sleeving and supports are correct, complete Form B1.

15.0 Validation and verification

Table 26 Summary of tests required on pipeline carcass

| Test order | Description           | Form |
|------------|-----------------------|------|
| 1          | Labelling and marking | B1   |
| 2          | Sleeving and supports | B1   |
| 3          | Leakage               | B1   |
| 4          | Cross-connection      | B2   |

Table 27 Summary of tests required on pipeline system

| Test order | Description                                            | Form |
|------------|--------------------------------------------------------|------|
| 5          | Leakage from total compressed into total vacuum system | B3   |
| 6          | Leakage into total vacuum system                       | B4   |
| 7          | Closure of AVSU                                        | B5A  |
| 8          | Zoning of AVSU                                         | B5B  |
| 9          | Cross-connection                                       | B6   |
| 10         | Flow and pressure drop at terminal units               | B7   |
| 11         | Mechanical function of terminal units                  | B7   |
| 12         | Gas specificity of terminal units                      | B7   |
| 13         | NIST connectors                                        | B7   |
| 14         | Performance tests of the pipeline system               | B7   |
| 15         | Functional tests of supply system                      | B8   |
| 16         | Pressure safety valves                                 | B9   |
| 17         | Warning systems                                        | B10  |
| 18         | Verification of drawings                               | B11  |
| 19         | Filling with medical air                               | B12  |
| 20         | Purging and filling with specific gases                | B13  |
| 21         | Quality                                                | B14  |
| 22         | Gas identity                                           | B15  |

**Leakage**

**15.150** If it has been necessary to link the carcasses to form a single system for the purpose of this test, care must be taken to ensure the links are removed. Alternatively, the test may be carried out on sections of the pipeline, provided no part of the pipeline is omitted.

*General conditions*

**15.151** The pipeline should be completely installed and correctly supported. The base blocks of all terminal units should be fitted and blanked. Other devices such as safety valves or pressure sensors need not be fitted. All connection sockets for such devices should be blanked.

*Procedure*

**15.152** Connect a suitable pressure measuring device to the pipeline. Fill the pipeline with test gas at the specified test pressure. Disconnect and remove the gas supply. Record the pipeline pressure and room temperature initially and again at the end of the test period (2–24 hours).



*Results*

**15.153** The rate of pressure drop during the tests should be less than 0.025% per hour, except for pressure changes due to temperature variations. The pressure change due to temperature variation is approximately 0.35% per °C. Record the results on Form B1.

**Cross-connection**

**15.154** Any links between the systems should be removed before this test is carried out. All pipelines should be at atmospheric pressure and all AVSUs should be open. A single pressure source should be used and connected to one pipeline at a time. This should remain under pressure throughout the test. At least one base block on all other pipelines should be fully open.

*Procedure*

**15.155** Connect one pipeline to the pressure source. Check that no gas flows from the open-base block on the other pipelines which are not under pressure. Each terminal unit on the pipeline under test should be opened, checked for flow and then reblanked. When testing has been completed on one pipeline, the pressure source should be removed and that pipeline should be left open to atmosphere. Another pipeline should then be pressurised and the procedure repeated.

*Results*

**15.156** The contractor should record that satisfactory tests have been completed on Form B2.

**Leakage from compressed medical gas systems**

**15.157** The leakage test described above should have been completed satisfactorily. All terminal unit valves and other devices such as safety valves and pressure sensors should be fitted. The supply system should be isolated from the pipeline. there should be no links between the pipeline systems. The test may be carried out on sections of each pipeline, provided no section is omitted. Different sections and pipelines may be tested at the same time.

*Procedure*

**15.158** Connect a suitable pressure measuring device to the pipeline. Fill the pipeline (or section of pipeline) with test gas at pipeline distribution pressure. This filling procedure may also be used to measure the volume of the pipeline (see Appendix H). Disconnect and remove the gas supply. Note the pressure and temperature initially and again at the end of the test period.

*Results*

**15.159** The rate of pressure drop during the test period should not exceed the value specified in Table 23, after allowing for pressure changes due to temperature variation. Record the results on Form B3.

### Leakage into vacuum systems

**15.160** The leakage test described above should have been completed satisfactorily. All terminal unit valves and other devices, such as pressure sensors, should be fitted. The vacuum supply should be connected to the system under test.

#### *Procedure*

**15.161** Connect a vacuum gauge to the system. Run the vacuum supply system to maintain pipeline distribution pressure until the pipeline system is dried out. With the system at pipeline distribution pressure, isolate the vacuum supply system. Note the vacuum initially and again after one hour.

#### *Results*

**15.162** Record the results on Form B4. The pressure increase after one hour should not exceed 10 kPa. There is no additional allowance for temperature variation in this test.

### Closure of AVSUs

**15.163** The test specified in paragraphs 15.50–15.53 must have been completed satisfactorily.

#### *Procedure*

**15.164** The procedure for this test is as follows:

- a. connect a pressure-measuring device to the system. The system should be at pipeline distribution pressure, with all AVSUs closed;
- b. depressurise the pipeline downstream of all AVSUs by inserting and leaving an open probe or flow meter into downstream terminal units.

#### *Results*

**15.165** Record the results on Form B5A. There should be no pressure or vacuum decrease upstream of the valve under test.

### Zoning of AVSUs

**15.166** The tests specified in paragraphs 15.54–15.57 must have been completed satisfactorily.

#### *Procedure*

**15.167** The procedure for the test is as follows:

- a. connect a pressure-measuring device to the system. The system should be at pipeline distribution pressure, and all AVSUs except the one under test should be open;
- b. decrease the pressure in the pipeline downstream of the AVSU under test to about 1 bar g (or 200 mm Hg (27 kPa) for vacuum). Note the number of terminal units controlled by the AVSU and check that they are all at the test pressure of 1 bar g (or 200 mm Hg (27 kPa));

- c. as test probes are inserted into terminal units in the section under test, there may be loss of pressure or vacuum. If necessary, re-adjust the test pressure;
- d. check the AVSU for leakage into the environment.

#### *Results*

**15.168** Record the results on Form B5B. Open the AVSU to achieve pipeline distribution pressure and proceed to test the next AVSU.

**15.169** During the test, it will be necessary to have the supply system connected to maintain pressures.

#### **Cross-connection**

**15.170** These tests should be carried out on one pipeline at a time. All pipelines should be at atmospheric pressure and AVSUs should be open. A single-pressure source should be used and connected to one pipeline at a time, which should remain under pressure throughout the test.

#### *Procedure*

**15.171** The procedure is as follows:

- a. connect one pipeline to the pressure source at pipeline distribution pressure;
- b. in order to depressurise the other system, insert an open probe into one terminal unit on each other system. Check that no gas flows into or out of these probes;
- c. check that gas flows through every terminal unit of the pipeline under pressure;
- d. check that there is no gas flow from any other terminal units when they are opened with the correct probes.

#### *Results*

**15.172** Record the results on Form B6 if there are no cross-connections.

**15.173** Repeat the procedure described above on each pipeline in turn, including vacuum, preferably at one session. This test should be repeated in full if any subsequent modifications are made to the pipeline system during construction.

#### **Functional tests of terminal units**

**15.174** These tests may be carried out at the same time as the cross-connection test described above. In this case, only one system at a time is pressurised.

#### *Procedure*

**15.175** The procedure is as follows:

- a. before commencing the tests, check that the test equipment meets the requirements given in Appendix C for the system under test. All terminal units should be complete with the fascia plate;

## 15.0 Validation and verification

- b. insert the test device described in Appendix C into each terminal unit in turn on the system under test. Note that the pressure drop at the specified flow does not exceed the value given in paragraph 15.63;
- c. check that the gas-specific probe can be inserted, captured and released and that it does not swivel in horizontally-mounted terminal units, and that it can swivel without undue force in vertically-mounted terminal units;
- d. check that no gas is released at each terminal unit by the probes for all other gases used, and that no probes can be engaged;
- e. check that all NIST connectors accept the NIST probe for the correct gas, and that mechanical connection is made. Check that the NIST probes for all other gases do not make mechanical connection;
- f. note that the NIST self-sealing device functions as specified in paragraph 15.67.

*NISTs incorporated in certified assemblies do not need to be tested (see paragraph 15.67)*

### Results

**15.175** Record the results on Form B7, if they are in accordance with paragraphs 15.63–15.67.

### Performance tests of the pipeline system

**15.176** These tests should be carried out on one system at a time.

**15.177** All AVSUs should be open. Connect a supply of test gas at the supply source of sufficient capacity to meet the total design flow of the system. The vacuum supply system may be used to test the vacuum pipeline system, as described in Appendix G.

### Procedure

**15.178** The procedure is as follows:

- a. insert leaks into selected terminal units, AVSUs and NISTs as appropriate throughout the system under test, to provide a total flow equal to the total design flow of that system;
- b. run the system so that the pressure/vacuum at the source meets the specification given in column 6 of Table 23;
- c. check the gauge pressure at the specified flow (Table 4) at selected terminal units throughout the system;
- d. record the results on Form B8 if they are in accordance with paragraph 15.68.

*Remedial work may be needed if these specifications are not met*

### Supply system tests

#### General

**15.179** All supply systems should be installed and connected to normal and standby power supplies.

**15.180** Specific checklists should have been prepared for each item of plant in accordance with paragraph 15.72.

*Procedure*

**15.181** The procedure is as follows:

- a. the functions and operating parameters of each item of plant should be checked;
- b. the supply systems should be shown to operate on the essential power supply;
- c. all pipework joints should be tested for leakage at normal operating pressure;
- d. the compressor plant should be tested for leaks during normal running.

*Results*

**15.182** It should be confirmed that the manufacturer's specification meets the requirements of the contract specification.

**15.183** Record the results on Form B9, if they are in accordance with the specific checklist.

**Safety valve inspection**

**15.184** Tests of safety valves are not required.

*Procedure*

**15.185** The procedure is as follows:

- a. inspect each safety valve to check that the discharge capacity and the set pressure are in accordance with the contract specification;
- b. check that the safety valves conform to BS 6759:Part 2;
- c. inspect the certification supplied with each valve.

*Results*

**15.186** Record the results on Form B10 if they are in accordance with paragraph 15.72.

**Warning system tests***General*

**15.187** The tests should be carried out for one function at a time on one system at a time.

**15.188** All alarm systems should be fully installed and in operation.

*Procedure*

**15.189** The procedure is as follows:

- a. adjust the pressure in each pipeline system either locally or throughout the pipeline system;

## 15.0 Validation and verification

- b. observe that the appropriate changes in warning-system conditions occur in accordance with paragraphs 15.76 and 15.77;
- c. check that the warning system will operate from the essential power source.

### *Results*

**15.190** Record the results on Form B11 if they are in accordance with paragraphs 15.76 and 15.77.

## **Verification of drawings**

### *Procedure*

**15.191** Inspect the "as-fitted" drawings, to ensure that all variations from the contract drawings have been recorded.

### *Results*

**15.192** Record the results on Form B12, if the drawings are in accordance with paragraph 15.78.

## **Filling with medical air**

**15.193** When an indefinite period may elapse before the system is taken into use, it should first be tested for particulate contamination, using medical air, as the test gas, in accordance with paragraphs 15.79–15.85.

### *Procedure*

**15.194** The procedure in paragraphs 15.79–15.85 should be followed for the particulate contamination test only, in accordance with paragraphs 15.95 and 15.96. If the test is satisfactory, the system should be filled with medical air and left pressurised at pipeline distribution pressure.

### *Results*

**15.195** If the results are satisfactory, they should be recorded on Form B14, which should be annotated to indicate that the system has been tested with medical air.

### *Special connectors*

**15.196** At the end of the contract period, the contractor should ensure that any special connectors are removed from site.

## **Purging and filling with specific gas**

### *General*

**15.197** The following should be carried out prior to purging and filling with the specific gas (all systems may be filled with their specific gases at the same time):

- a. all previous tests should have been satisfactorily completed;
- b. each pipeline system should be connected to its source of supply, with all AVSUs open;
- c. all sources of test gas should be disconnected;
- d. all special connectors and cylinders should be removed from site.

#### *Procedure*

**15.198** The procedure is as follows:

- a. starting at atmospheric pressure (except for vacuum systems), fill each pipeline system to pipeline-distribution pressure;
- b. with the supply system on, purge each terminal unit with a known volume of gas at least equal to the volume of the pipeline being tested;
- c. leave each system at pipeline-distribution pressure, with the supply system connected.

#### *Results*

**15.199** Record on Form B13 that the systems have been filled in accordance with paragraph 15.86.

#### **Tests for quality**

**15.200** The pipeline systems should be at pipeline-distribution pressure and filled with the specific gas, except for tests for particulate contamination, which may be carried out with medical air if the system is not to be taken into use immediately.

#### *Procedure*

**15.201** The procedure is as follows:

- a. the tests specified in paragraphs 15.88–15.105 should be carried out on a representative sample of terminal units for each system, at the discretion of the QC. The sample should include as a minimum the most distant terminal unit on each branch, which would normally be the first terminal unit to be tested. Depending on the results of the tests, the QC should decide the number and location of additional terminal units to be tested;
- b. tests may be carried out simultaneously where appropriate;
- c. the tests are summarised in Table 24.

#### *Results*

**15.202** Record the results on Form B14 if they are in accordance with the specifications of paragraphs 15.88–15.105.

## Tests for gas identity

### *General*

**15.203** All systems should preferably be tested at the same time. The previous tests must have been satisfactorily completed.

### *Procedure*

**15.204** The tests specified in paragraphs 15.106–15.110 should be carried out at all terminal units, using the equipment described in Appendix F.

### *Results*

**15.205** Record the results on Form B15 if they are in accordance with paragraphs 15.106–15.110 and Table 25.

## System taken into use

**15.206** When all the tests have been satisfactorily completed, the construction labels should be removed and the system may be taken into use.



# Appendix A

## Testing, commission and filling for use: forms to be completed during testing and commissioning of piped medical gases systems

|                                                           | Form |
|-----------------------------------------------------------|------|
| Summary of tests                                          | B0   |
| <b>Carcass tests</b>                                      |      |
| Labelling and marking                                     | B1   |
| Sleeving and supports                                     | B1   |
| Leakage test                                              | B1   |
| Cross-connection test                                     | B2   |
| <b>System tests</b>                                       |      |
| Leakage test                                              | B3   |
| Vacuum leakage test                                       | B4   |
| AVSUs – closure and zoning tests                          | B5   |
| Cross-connection test                                     | B6   |
| Functional tests of terminal units<br>and NIST connectors | B7   |
| Design flow performance test                              | B8   |
| Sources of supply                                         | B9   |
| Pressure safety valves                                    | B10  |
| Warning systems                                           | B11  |
| Verification of drawings                                  | B12  |
| Purging and filling                                       | B13  |
| Quality                                                   | B14  |
| Gas identification                                        | B15  |

Hospital \_\_\_\_\_ Scheme \_\_\_\_\_

File Number \_\_\_\_\_ Date \_\_\_\_\_

Summary of Tests

This is to certify that the following tests have been carried out:

| System                                                 | Form | Test Carried Out Satisfactorily |
|--------------------------------------------------------|------|---------------------------------|
| <b>Carcass Tests</b>                                   |      |                                 |
| Labelling and Marking                                  | B1   |                                 |
| Sleeving and Supports                                  | B1   |                                 |
| Leakage Test                                           | B1   |                                 |
| Cross Connection Test                                  | B2   |                                 |
| <b>System Tests</b>                                    |      |                                 |
| Leakage Test                                           | B3   |                                 |
| Vacuum Leakage Test                                    | B4   |                                 |
| Area Valve Service Units – Closure and Zoning Tests    | B5   |                                 |
| Cross-connection Test                                  | B6   |                                 |
| Functional Tests of Terminal Units and NIST Connectors | B7   |                                 |
| Design Flow Performance Tests                          | B8   |                                 |
| Sources of Supply                                      | B9   |                                 |
| Pressure Safety Valves                                 | B10  |                                 |
| Warning Systems                                        | B11  |                                 |
| Verification of Drawings                               | B12  |                                 |
| Purging and Filling                                    | B13  |                                 |
| Quality                                                | B14  |                                 |
| Gas Identification                                     | B15  |                                 |
| Permit-to-work Form                                    |      |                                 |
| Construction Labels Removed                            |      |                                 |

Responsible Officer

Status \_\_\_\_\_ Signed \_\_\_\_\_

Date \_\_\_\_\_ Name \_\_\_\_\_

All appropriate tests satisfactorily carried out. System may now be taken into use.

Authorised Person (MGPS) \_\_\_\_\_

Status \_\_\_\_\_ Signed \_\_\_\_\_

Date \_\_\_\_\_ Name \_\_\_\_\_

Medical Gas Pipeline Carcass Tests

Form B1 (Sheet of Sheets)

Hospital \_\_\_\_\_ Scheme \_\_\_\_\_

File Number \_\_\_\_\_ Date \_\_\_\_\_

Part 1 – Leakage Test, Labelling and Marking, Sleeving and Supports

This is to certify that a LEAKAGE test in accordance with paragraphs 5.3–5.6 was carried out on the piped system on this scheme and that during the test, a pressure, as shown in column 2 below, was held as follows. A certified gauge number \_\_\_\_\_ was used.

| Section Tested<br>(1) | Test Pressure<br>(2) | Hours on Test<br>(3) | Pressure Drop (kPa)<br>(4) | Pressure Drop % hr<br>(5) | Pass/Fail Specification<br>0.025%<br>(6) | Labelling & Marking as para 5.1<br>Yes/No<br>(7) | Sleeving & Supports as para 5.2<br>Yes/No<br>(8) |
|-----------------------|----------------------|----------------------|----------------------------|---------------------------|------------------------------------------|--------------------------------------------------|--------------------------------------------------|
|                       |                      |                      |                            |                           |                                          |                                                  |                                                  |
|                       |                      |                      |                            |                           |                                          |                                                  |                                                  |
|                       |                      |                      |                            |                           |                                          |                                                  |                                                  |
|                       |                      |                      |                            |                           |                                          |                                                  |                                                  |
|                       |                      |                      |                            |                           |                                          |                                                  |                                                  |
|                       |                      |                      |                            |                           |                                          |                                                  |                                                  |
|                       |                      |                      |                            |                           |                                          |                                                  |                                                  |
|                       |                      |                      |                            |                           |                                          |                                                  |                                                  |
|                       |                      |                      |                            |                           |                                          |                                                  |                                                  |
|                       |                      |                      |                            |                           |                                          |                                                  |                                                  |

SPECIMEN

Part 2 – Links Between Systems

For the purpose of carrying out this test, the following links have been made:

\_\_\_\_\_

\_\_\_\_\_

This is to certify that the above tests have been carried out and that the following links have been removed:

\_\_\_\_\_

\_\_\_\_\_

Contractor’s Representative

Status \_\_\_\_\_ Signed \_\_\_\_\_

Date \_\_\_\_\_ Name \_\_\_\_\_

Contract Supervising Officer

Status \_\_\_\_\_ Signed \_\_\_\_\_

Date \_\_\_\_\_ Name \_\_\_\_\_





Medical Gas Pipeline Total System Tests

Form B4 (Sheet of Sheets)

Hospital \_\_\_\_\_ Scheme \_\_\_\_\_

File Number \_\_\_\_\_ Date \_\_\_\_\_

Leakage into Total Vacuum System Test

This is to certify that a LEAKAGE test in accordance with paragraph 5.6 was carried out on the piped vacuum system at a system pressure of \_\_\_\_\_ kPa. The pressure increase after 1 hour was \_\_\_\_\_ kPa (max 10 kPa).

SPECIMEN

Contractor's Representative

Status \_\_\_\_\_ Signed \_\_\_\_\_

Date \_\_\_\_\_ Name \_\_\_\_\_

Contract Supervising Officer

Status \_\_\_\_\_ Signed \_\_\_\_\_

Date \_\_\_\_\_ Name \_\_\_\_\_

Witnessed on behalf of \_\_\_\_\_

By \_\_\_\_\_ Status \_\_\_\_\_

Signed \_\_\_\_\_ Date \_\_\_\_\_







Medical Gas Pipeline Total System Tests

Form B7a (Sheet of Sheets)

Hospital \_\_\_\_\_ Scheme \_\_\_\_\_

File Number \_\_\_\_\_ Date \_\_\_\_\_

Functional Tests of Terminal Units

(In accordance with the Contract Specification and paragraphs 6.15–6.17).

System \_\_\_\_\_

Specified Flow \_\_\_\_\_ L/min Specified Pressure Drop \_\_\_\_\_ kPa

| TERMINAL UNIT NUMBER | Room Number | Specified Flow Achieved Yes/No | Specified Pressure Drop Achieved Yes/No | Mechanical Function | Gas Specificity |
|----------------------|-------------|--------------------------------|-----------------------------------------|---------------------|-----------------|
|                      |             |                                |                                         |                     |                 |
|                      |             |                                |                                         |                     |                 |
|                      |             |                                |                                         |                     |                 |
|                      |             |                                |                                         |                     |                 |
|                      |             |                                |                                         |                     |                 |
|                      |             |                                |                                         |                     |                 |
|                      |             |                                |                                         |                     |                 |
|                      |             |                                |                                         |                     |                 |
|                      |             |                                |                                         |                     |                 |
|                      |             |                                |                                         |                     |                 |
|                      |             |                                |                                         |                     |                 |
|                      |             |                                |                                         |                     |                 |
|                      |             |                                |                                         |                     |                 |
|                      |             |                                |                                         |                     |                 |

SPECIMEN

Contractor's Representative

Status \_\_\_\_\_ Signed \_\_\_\_\_

Date \_\_\_\_\_ Name \_\_\_\_\_

Contract Supervising Officer

Status \_\_\_\_\_ Signed \_\_\_\_\_

Date \_\_\_\_\_ Name \_\_\_\_\_

Witnessed on behalf of \_\_\_\_\_

By \_\_\_\_\_ Status \_\_\_\_\_

Signed \_\_\_\_\_ Date \_\_\_\_\_

**Appendix A**

Medical Gas Pipeline Total System Tests

Form B7b (Sheet of Sheets)

Hospital \_\_\_\_\_ Scheme \_\_\_\_\_

File Number \_\_\_\_\_ Date \_\_\_\_\_

Functional Tests NIST Connectors  
(In accordance with the Contract Specification and paragraphs 6.18–6.19)

System \_\_\_\_\_

| NIST Gas | Location or Identification | Room Number | Gas Specificity Pass/Fail | Self-Sealing Adequate/Inadequate |
|----------|----------------------------|-------------|---------------------------|----------------------------------|
|          |                            |             |                           |                                  |
|          |                            |             |                           |                                  |
|          |                            |             |                           |                                  |
|          |                            |             |                           |                                  |
|          |                            |             |                           |                                  |
|          |                            |             |                           |                                  |
|          |                            |             |                           |                                  |
|          |                            |             |                           |                                  |
|          |                            |             |                           |                                  |
|          |                            |             |                           |                                  |
|          |                            |             |                           |                                  |
|          |                            |             |                           |                                  |
|          |                            |             |                           |                                  |
|          |                            |             |                           |                                  |

SPECIMEN

Contractor's Representative  
 Status \_\_\_\_\_ Signed \_\_\_\_\_  
 Date \_\_\_\_\_ Name \_\_\_\_\_

Contract Supervising Officer  
 Status \_\_\_\_\_ Signed \_\_\_\_\_  
 Date \_\_\_\_\_ Name \_\_\_\_\_

Witnessed on behalf of \_\_\_\_\_  
 By \_\_\_\_\_ Status \_\_\_\_\_  
 Signed \_\_\_\_\_ Date \_\_\_\_\_

Medical Gas Pipeline Total System Tests

Form B8 (Sheet of Sheets)

Hospital \_\_\_\_\_ Scheme \_\_\_\_\_

File Number \_\_\_\_\_ Date \_\_\_\_\_

Design Flow Performance Tests  
(In accordance with paragraphs 6.20–6.23)

System \_\_\_\_\_ System design flow \_\_\_\_\_ (L/min)

Terminal Unit test flow \_\_\_\_\_ (L/min) Test Pressure \_\_\_\_\_ (kPa)

Minimum gauge pressure allowed \_\_\_\_\_ (kPa)

| Terminal Unit No | Room No | Specification Met (√) | Terminal Unit No | Room No | Specification Met (√) | Terminal Unit No | Room No | Specification Met (√) |
|------------------|---------|-----------------------|------------------|---------|-----------------------|------------------|---------|-----------------------|
|                  |         |                       |                  |         |                       |                  |         |                       |
|                  |         |                       |                  |         |                       |                  |         |                       |
|                  |         |                       |                  |         |                       |                  |         |                       |
|                  |         |                       |                  |         |                       |                  |         |                       |
|                  |         |                       |                  |         |                       |                  |         |                       |
|                  |         |                       |                  |         |                       |                  |         |                       |
|                  |         |                       |                  |         |                       |                  |         |                       |
|                  |         |                       |                  |         |                       |                  |         |                       |
|                  |         |                       |                  |         |                       |                  |         |                       |
|                  |         |                       |                  |         |                       |                  |         |                       |
|                  |         |                       |                  |         |                       |                  |         |                       |
|                  |         |                       |                  |         |                       |                  |         |                       |
|                  |         |                       |                  |         |                       |                  |         |                       |
|                  |         |                       |                  |         |                       |                  |         |                       |
|                  |         |                       |                  |         |                       |                  |         |                       |
|                  |         |                       |                  |         |                       |                  |         |                       |
|                  |         |                       |                  |         |                       |                  |         |                       |
|                  |         |                       |                  |         |                       |                  |         |                       |
|                  |         |                       |                  |         |                       |                  |         |                       |
|                  |         |                       |                  |         |                       |                  |         |                       |

SPECIMEN

Contractor's Representative  
 Status \_\_\_\_\_ Signed \_\_\_\_\_  
 Date \_\_\_\_\_ Name \_\_\_\_\_

Contract Supervising Officer  
 Status \_\_\_\_\_ Signed \_\_\_\_\_  
 Date \_\_\_\_\_ Name \_\_\_\_\_

Witnessed on behalf of \_\_\_\_\_  
 By \_\_\_\_\_ Status \_\_\_\_\_  
 Date \_\_\_\_\_ Signed \_\_\_\_\_

Medical Gas Pipeline Total System Tests

Form B9 (Sheet of Sheets)

Hospital \_\_\_\_\_ Scheme \_\_\_\_\_

File Number \_\_\_\_\_ Date \_\_\_\_\_

Sources of Supply

This is to certify that the following sources of supply have been tested according to paragraphs 6.24–6.25 and the attached sheets and found to comply with the specification.

| Source of Supply    | Contractor's Representative Name/Signature | Contract Supervising Officer Name/Signature |
|---------------------|--------------------------------------------|---------------------------------------------|
| Manifold            |                                            |                                             |
| Manifold            |                                            |                                             |
| Manifold            |                                            |                                             |
|                     |                                            |                                             |
| Liquid Oxygen Plant |                                            |                                             |
|                     |                                            |                                             |
|                     |                                            |                                             |
| Air Compressor      |                                            |                                             |
|                     |                                            |                                             |
|                     |                                            |                                             |
| Vacuum Plant        |                                            |                                             |
|                     |                                            |                                             |
|                     |                                            |                                             |
| Oxygen Concentrator |                                            |                                             |
|                     |                                            |                                             |
|                     |                                            |                                             |

SPECIMEN

Witnessed on behalf of \_\_\_\_\_

By \_\_\_\_\_ Status \_\_\_\_\_

Date \_\_\_\_\_ Signed \_\_\_\_\_

Medical Gas Pipeline Total System Tests

Form B10 (Sheet of Sheets)

Hospital \_\_\_\_\_ Scheme \_\_\_\_\_

File Number \_\_\_\_\_ Date \_\_\_\_\_

Pressure Safety Valves

The pressure safety valves fitted to the pipeline systems have been inspected together with their certification and are in accordance with the contract specification and paragraphs 6.26–6.27.

| Location | Valve Number | Position | Pipeline Distrib. Pressure (A) | Certified Discharge Pressure (B) | B/A (%) |
|----------|--------------|----------|--------------------------------|----------------------------------|---------|
|          |              |          |                                |                                  |         |
|          |              |          |                                |                                  |         |
|          |              |          |                                |                                  |         |
|          |              |          |                                |                                  |         |
|          |              |          |                                |                                  |         |
|          |              |          |                                |                                  |         |
|          |              |          |                                |                                  |         |
|          |              |          |                                |                                  |         |
|          |              |          |                                |                                  |         |
|          |              |          |                                |                                  |         |
|          |              |          |                                |                                  |         |
|          |              |          |                                |                                  |         |
|          |              |          |                                |                                  |         |
|          |              |          |                                |                                  |         |

SPECIMEN

If certificates are not provided, do not sign.

Contractor's Representative  
 Status \_\_\_\_\_ Signed \_\_\_\_\_  
 Date \_\_\_\_\_ Name \_\_\_\_\_

Contract Supervising Officer  
 Status \_\_\_\_\_ Signed \_\_\_\_\_  
 Date \_\_\_\_\_ Name \_\_\_\_\_

Witnessed on behalf of \_\_\_\_\_  
 By \_\_\_\_\_ Status \_\_\_\_\_  
 Date \_\_\_\_\_ Signed \_\_\_\_\_

Medical Gas Pipeline Total System Tests

Form B11 (Sheet of Sheets)

Hospital \_\_\_\_\_ Scheme \_\_\_\_\_

File Number \_\_\_\_\_ Date \_\_\_\_\_

Warning Systems

This is to certify that the WARNING SYSTEMS on the following medical gas pipeline systems have been tested in accordance with paragraphs 6.28–6.29 as follows:

| System                        | O <sub>2</sub> | N <sub>2</sub> O | N <sub>2</sub> O/O <sub>2</sub> | MA-4 | Surgical Air | VAC |
|-------------------------------|----------------|------------------|---------------------------------|------|--------------|-----|
| Specified Warning Pressure    |                |                  |                                 |      |              |     |
| Observed Warning Pressure     |                |                  |                                 |      |              |     |
| Warning Given                 |                |                  |                                 |      |              |     |
| Return to normal              |                |                  |                                 |      |              |     |
| Marking                       |                |                  |                                 |      |              |     |
| All Functions on all stations |                |                  |                                 |      |              |     |
| Stand-by Power                |                |                  |                                 |      |              |     |
|                               |                |                  |                                 |      |              |     |
|                               |                |                  |                                 |      |              |     |
|                               |                |                  |                                 |      |              |     |
|                               |                |                  |                                 |      |              |     |
|                               |                |                  |                                 |      |              |     |
|                               |                |                  |                                 |      |              |     |
|                               |                |                  |                                 |      |              |     |
|                               |                |                  |                                 |      |              |     |
|                               |                |                  |                                 |      |              |     |
|                               |                |                  |                                 |      |              |     |
|                               |                |                  |                                 |      |              |     |
|                               |                |                  |                                 |      |              |     |

SPECIMEN

Contractor's Representative

Status \_\_\_\_\_ Signed \_\_\_\_\_

Date \_\_\_\_\_ Name \_\_\_\_\_

Contract Supervising Officer

Status \_\_\_\_\_ Signed \_\_\_\_\_

Date \_\_\_\_\_ Name \_\_\_\_\_

Witnessed on behalf of \_\_\_\_\_

By \_\_\_\_\_ Status \_\_\_\_\_

Date \_\_\_\_\_ Signed \_\_\_\_\_

Medical Gas Pipeline Total System Tests

Form B12 (Sheet of Sheets)

Hospital \_\_\_\_\_ Scheme \_\_\_\_\_

File Number \_\_\_\_\_ Date \_\_\_\_\_

Verification of Drawings

This is to certify that in accordance with paragraph 11.1, the as-fitted drawings of the following systems record all variations from the contract drawings:

| System                          | Drawing Numbers | Contractor's Representative Status/Name | Contract Supervising Officer Status/Name | Date |
|---------------------------------|-----------------|-----------------------------------------|------------------------------------------|------|
| O <sub>2</sub>                  |                 |                                         |                                          |      |
| N <sub>2</sub> O                |                 |                                         |                                          |      |
| N <sub>2</sub> O/O <sub>2</sub> |                 |                                         |                                          |      |
| MA-4                            |                 |                                         |                                          |      |
| Surgical Air                    |                 |                                         |                                          |      |
| VAC                             |                 |                                         |                                          |      |
| AGS                             |                 |                                         |                                          |      |

SPECIMEN

Witnessed on behalf of \_\_\_\_\_

By \_\_\_\_\_ Status \_\_\_\_\_

Date \_\_\_\_\_ Signed \_\_\_\_\_

Hospital \_\_\_\_\_ Scheme \_\_\_\_\_

File Number \_\_\_\_\_ Date \_\_\_\_\_

Purging and Filling

This is to certify that medical gas systems have been purged and filled with the working gases in accordance with paragraphs 7.1–7.7 and/or 8.1–8.2 as follows:

| Action                                             | O <sub>2</sub> | N <sub>2</sub> O | N <sub>2</sub> O/O <sub>2</sub> | MA-4 | Surgical Air | VAC |
|----------------------------------------------------|----------------|------------------|---------------------------------|------|--------------|-----|
| Special Connectors/<br>Cylinders removed from site |                |                  |                                 |      |              |     |
| Filling                                            |                |                  |                                 |      |              |     |
| Purging all Terminal Units                         |                |                  |                                 |      |              |     |
| Venting                                            |                |                  |                                 |      |              |     |

SPECIMEN

Contractor's Representative

Status \_\_\_\_\_ Signed \_\_\_\_\_

Date \_\_\_\_\_ Name \_\_\_\_\_

Contract Supervising Officer

Status \_\_\_\_\_ Signed \_\_\_\_\_

Date \_\_\_\_\_ Name \_\_\_\_\_

Witnessed on behalf of \_\_\_\_\_

By \_\_\_\_\_ Status \_\_\_\_\_

Date \_\_\_\_\_ Signed \_\_\_\_\_



Medical Gas Pipeline Total System Tests

Form B14 (Sheet of Sheets)

Hospital \_\_\_\_\_ Scheme \_\_\_\_\_

File Number \_\_\_\_\_ Date \_\_\_\_\_

Quality

This is to certify that medical gas pipeline systems have been tested in accordance with Section 9 of 'Validation and verification' as follows:

| Parameter          | Specification             | Sample* | Tick when specification is met |                  |                                 |             |              |
|--------------------|---------------------------|---------|--------------------------------|------------------|---------------------------------|-------------|--------------|
|                    |                           |         | O <sub>2</sub>                 | N <sub>2</sub> O | N <sub>2</sub> O/O <sub>2</sub> | Medical Air | Surgical Air |
| Particulate matter | Practically particle free |         |                                |                  |                                 |             |              |
| Odour              | No odour                  |         |                                | N/A              | N/A                             |             |              |
| Oil                | <0.5 mg/m <sup>3</sup>    |         | N/A                            | N/A              | N/A                             |             |              |
| Water              | < 115 VPM (0.95 mg/L)     |         |                                |                  |                                 |             |              |
| CO                 | Less than < 5 ppm         |         | N/A                            | N/A              | N/A                             |             |              |
| CO <sub>2</sub>    | Less than < 500 ppm       |         |                                | N/A              | N/A                             |             |              |

\*Insert actual number of samples tested and location.  
For PSA Systems only, CO<sub>2</sub> < 300 ppm.

Contractor's Representative

Status \_\_\_\_\_ Signed \_\_\_\_\_

Date \_\_\_\_\_ Name \_\_\_\_\_

Contract Supervising Officer

Status \_\_\_\_\_ Signed \_\_\_\_\_

Date \_\_\_\_\_ Name \_\_\_\_\_

Quality Controller \_\_\_\_\_

Status \_\_\_\_\_ Signed \_\_\_\_\_

Date \_\_\_\_\_ Name \_\_\_\_\_

Medical Gas Pipeline Tests

Form B15 (Sheet of Sheets)

Hospital \_\_\_\_\_ Scheme \_\_\_\_\_

File Number \_\_\_\_\_ Date \_\_\_\_\_

Gas Identification

This is to certify that the identity of the gas at all terminal units has been tested in accordance with Section 10 of 'Validation and verification' as follows:

| Piped Supply                    | Test For         | Specification Limit | Result |
|---------------------------------|------------------|---------------------|--------|
| Oxygen                          | O <sub>2</sub>   | Not less than 99.0% |        |
|                                 | N <sub>2</sub> O | 0                   |        |
| N <sub>2</sub> O                | O <sub>2</sub>   | 0                   |        |
|                                 | N <sub>2</sub> O | not less than 98%   |        |
| N <sub>2</sub> O/O <sub>2</sub> | O <sub>2</sub>   | 50 ± 2%             |        |
|                                 | N <sub>2</sub> O | 50 ± 2%             |        |
| Medical Air                     | O <sub>2</sub>   | 21 ± 1%             |        |
|                                 | N <sub>2</sub> O | 0                   |        |
| Surgical Air                    | O <sub>2</sub>   | 21 ± 1%             |        |
|                                 | N <sub>2</sub> O | 0                   |        |
| Vacuum                          | Suction          | Suction present     |        |

All % are v/v.

Quality Controller

Status \_\_\_\_\_ Signed \_\_\_\_\_

Date \_\_\_\_\_ Name \_\_\_\_\_

Witnessed on behalf of \_\_\_\_\_

By \_\_\_\_\_ Authorised Person (MGPS) \_\_\_\_\_

Date \_\_\_\_\_ Signed \_\_\_\_\_

# Appendix B

## Gas pressure variation with temperature

### General

1. Tests are specified for leakage of the pipeline carcass and the pipeline systems. During these tests, pressure changes may occur which are caused by temperature changes rather than leakage.
2. Pressure changes due to temperature difference may be calculated according to the Gas Laws.
3. It is assumed that the temperature in the pipeline is uniform in all branches. If substantial runs are external, an average temperature should be chosen.

### Calculation

4. The change in gas pressure with temperature is as follows.
5.  $P_1/T_1 = P_2/T_2$  where  $P_1$  and  $P_2$  are the initial and final absolute pressure of a fixed volume of gas and  $T_1$  and  $T_2$  are the initial and final absolute temperatures.
6. (bar absolute) and Kelvin  
Therefore  $P_2 = \frac{P_1 \times T_2}{T_1}$
7. Care must be taken to express pressure and temperature in absolute values.
8. Pressure is normally expressed in gauge pressure. Absolute pressure = gauge pressure + atmospheric pressure.
9. Temperature is normally expressed in °C.

### Examples

10. The carcass of a medical air pipeline is tested for leakage at a working pressure of 14.0 bar gauge pressure. The temperature is 13°C at the beginning of the test and 17°C at the end of the test.

$$P_1 = 14.0 + 1.0 = 15.0 \text{ bar a}$$

$$T_1 = 273 + 13 = 286\text{K}$$

$$T_2 = 273 + 17 = 290\text{K}$$

$$\text{therefore } P_2 = \frac{15 \times 290}{286} = \begin{array}{l} 15.21 \text{ bar (absolute)} \\ (14.21 \text{ bar g)} \end{array}$$

that is, gauge pressure should read 14.21 bar at the end of the test, assuming that no leakage has occurred.

# Appendix C

## Pressure drop test device

### General

1. Special test devices are required to measure the pressure at specified flows at each terminal unit.
2. Suitable test devices are commercially available or may be constructed in accordance with the outline specification given below.

### Measurement principle

3. Flow at a specified pressure may be measured either with a calibrated orifice or with a flowmeter.
4. Pressure may be measured with a bourdon gauge.
5. A gas-specific probe conforming to BS 5682 should be used to connect the device to the terminal unit.
6. The test device is connected to the terminal unit by the gas-specific probe and the pressure at the specified flow is read on the gauge.

### Functional requirements

7. The test device should consist of the following components:

|                               |                              |                      |
|-------------------------------|------------------------------|----------------------|
| Gas-specific probe to BS 5682 | Body on/off valve (optional) | Orifice or flowmeter |
|                               | Pressure gauge               |                      |

8. The body may be of a design which allows exchange of the following components:
  - a. gas-specific probes;
  - b. calibrated orifices;
  - c. pressure gauges.
9. An on/off valve may be incorporated into the body.
10. The complete assembly should be tested for leaks.
11. Where it would be impractical to use gas-specific probes, it is permissible to use a specially designed universal probe, provided it is impossible for such a probe to be improperly used on medical equipment. The special probe should be clearly marked "test only".

**Test probes for gas specificity**

12. The gas-specific probe for each service should be as specified in BS 5682:1984.

**Orifices**

13. The orifices should be selected from the information on the manufacturer's data sheets or from practical testing.

14. These devices should be checked against a flowmeter before use.

**Flowmeter**

15. A bobbin flowmeter calibrated to a flow of 40 l/min may be used to measure flow under vacuum.

**Pressure gauge**

16. A 50 mm bourdon gauge with an appropriate full scale reading and interval should be used as follows:

| Test pressure kPa | Scale                      | Scale interval      |
|-------------------|----------------------------|---------------------|
| 400               | 0–7 bar                    | 0.1 bar             |
| 700               | 0–11 bar                   | 0.5 bar             |
| Vacuum            | 0–760 mm Hg<br>(0–100 kPa) | 50 mm Hg<br>(5 kPa) |

Note: 1 bar = 100 kPa approx.

# Appendix D

## Membrane filter test device

### General

1. The function of this test device is to collect particulate material which may be present in the pipeline.
2. The terminal units to be sampled should be in accordance with paragraph 15.91.
3. Filter holders appropriate to the pressure encountered are commercially available.
4. The filter holder should be specified for use at pipeline-distribution pressure and be oxygen-compatible.

### Measurement principle

5. A known volume of gas is passed through a membrane filter which will collect all visible particles.
6. Membrane filters are available in a range of pore sizes. A maximum pore size of 10 mm will collect all visible material. Pore sizes below 0.2 mm are likely to restrict flow; typical pore size is 0.45 mm.
7. The QC should examine the condition of the filter, which should be practically free from visible particles, and should decide whether the test has passed or failed, according to the number and size of visible particles.

### Test equipment

8. The following equipment is required:
  - a. a membrane filter holder;
  - b. a supply of white membrane filters of not more than 10 µm pore size and with high mechanical strength;
  - c. a means of connecting the filter to the pipeline;
  - d. a means of controlling the flow through the filter, which is connected downstream of the filter. One method of achieving this is to use the appropriate Amal jets to achieve a flow of 150 l/min at 400 kPa and 700 kPa;
  - e. all equipment must be oxygen-compatible and hoses should be anti-static.

### Procedure

9. The following procedure should be carried out:
  - a. place a single filter into the filter holder;

- b. assemble the filter holder so that it seals;
- c. set the flow controller to 150  $\mu$ /min;
- d. connect the filter holder to the terminal unit for 30 seconds;
- e. inspect the filter. Evaluate and record the result.

# Appendix E

## Equipment for contaminant testing

### General

1. The function of these tests is to establish whether the pipeline has been contaminated during construction or modification. The specifications for the permissible concentrations of each component are summarised in Table 24.
2. Simple equipment which is of the required sensitivity and is suitable for use on site is commercially available.

### Measurement principle

3. A known volume of gas is passed through a tube packed with an absorbent, which is coated with specific colorimetric reagents. The reagents react quantitatively with the compound to be measured and produce a colour change along the length of the tube, which is proportional to the concentration of the compound being measured.
4. Tubes are available with appropriate sensitivities for the measurement of oil, water, carbon monoxide and carbon dioxide, sulphur dioxide, and higher oxides of nitrogen.

### Procedure

5. It is possible to measure water, carbon monoxide and carbon dioxide simultaneously by connecting a tube and pump for each contaminant to a common hose, which is connected to the pipeline at a flow of 2 to 5 l/min. The pump is used to draw a known volume of gas through the tube at ambient pressure (the gas being tested should be allowed to escape freely to a safe area), and allow evaluation of the concentration of the compound being measured.
6. There are tubes currently available to measure oil contamination, but each test takes a minimum of 120 minutes.
7. These tubes give a quantitative response and are not intended for re-use. It may be appropriate if a nil reading is recorded, to validate that the tube is functional by testing the tube on a known sample.
8. Record the results.

*Non agent-specific detector tubes are difficult to interpret and are not recommended because of their qualitative and not quantitative response*



# Appendix F

## Equipment for gas identification

### General

1. The function of these tests is positively to identify medical gases by measuring their oxygen, nitrous oxide and nitric oxide content. The specified concentration limits for this purpose are given in Table 25.

*N<sub>2</sub> should be used as the inert gas shield; carbon dioxide should not be used*

2. Portable equipment of the required specificity and sensitivity is commercially available.

3. Thermal conductivity meters do not give a positive identification of nitrous oxide in the presence of carbon dioxide, and should not be used as a sole means of identification of nitrous oxide. A specific nitrous oxide meter should be used. If carbon dioxide pipelines are present, for example in IVF clinics, a carbon dioxide detector tube should be used.

### Specificity

#### Oxygen

*A paramagnetic meter is the specified instrument for identity of oxygen*

4. Oxygen-specific sensors using different measurement principles are currently in manufacture. The oxygen sensor should not give greater than  $\pm 1\%$  response in the presence of 100% nitrous oxide, 100% nitrogen or 100% carbon dioxide. Nitrous oxide and nitric oxide could be present at up to 100% concentrations if the system has been inadequately purged.

#### Nitrous oxide

5. The nitrous oxide sensor should not give greater than  $\pm 1\%$  response in the presence of 100% oxygen, 100% nitrogen or 100% carbon dioxide. An infra-red/fuel cell meter is now commercially available.

### Specification

6. The equipment should be portable, preferably battery-powered, with digital or analogue indication of 0–100% to one decimal place. The battery should give at least eight hours' continuous running between recharging or replacement.

7. An accuracy better than  $\pm 1\%$  is required, with a zero stability of 2.5% per day.

8. The response time must be not more than 15 seconds to 90% of the final reading.

**Procedure**

9. This is as follows:
  - a. calibrate the equipment to check zero and 100% response;
  - b. regulate the flow of gas from the terminal unit to the equipment;
  - c. allow the reading to stabilise;
  - d. record the result for each terminal unit.

# Appendix G

## Procedures for measuring the design flow of vacuum plant

### General

1. A method is described which enables a large vacuum system to be run at the system design flow, using a minimum quantity of calibrated test equipment.

### Measuring principle

2. A calibrated orifice device is connected to the system close to the plant so that the plant runs at the system design flow. The vacuum at that point is then noted.
3. The calibrated orifice is then removed and a number of uncalibrated leaks are introduced throughout the system to give the same level of vacuum at the plant.

### Test equipment

4. Suitable calibrated orifice devices are available.
5. Uncalibrated leaks may be constructed from medical gas probes connected to large AMAL jets or lengths of suitable diameter tubing.

### Procedure

6. Connect the air flow meter at a suitable point adjacent to the plant. Set the meter orifice to the system design flow.
7. Run the plant continuously with the pipeline system isolated.
8. Record the pressure on the vacuum gauge.
9. Reconnect the pipeline system to the plant. Close the meter orifices, leaving the vacuum gauge connected.
10. Insert non-calibrated leaks at suitable points throughout the pipeline system.
11. Adjust the number and size of the non-calibrated leaks until the vacuum gauge at the test point shows the same reading as in paragraph 8 above.
12. The system will then be running at the system design flow and the total system test can be carried out at each terminal unit for performance.

# Appendix H

## Procedure for measuring pipeline volume

### General

1. A method is described to measure the volume of a compressed medical gas system with an acceptable accuracy.

### Measurement principle

2. A known volume of gas is delivered into a closed system from a cylinder. The pressure changes in the system and the cylinder are noted. Since the volume of the cylinder is known, the volume of the pipeline system can be calculated.

3. The accuracy of the method depends upon the accuracy of reading the pressure changes.

### Test equipment

4. The following equipment is required:
- a cylinder of test gas of known internal volume (water capacity). This is not the volume of gas contained in the cylinder. To achieve maximum accuracy it is essential to arrange for the maximum change in pressure. In practice, the cylinder used to charge the system for this test should be the smallest practicable to fill the pipeline to the operating pressure;
  - a cylinder pressure regulator fitted with an accurate gauge to measure cylinder pressure. A gauge of at least 100 mm diameter with an appropriate full-scale reading is required;
  - an accurate (100 mm) gauge to measure pipeline pressure. This gauge should be calibrated in the same units as the cylinder pressure gauge;
  - a means of connecting the cylinder to the pipeline.

### Procedure

- Establish the water capacity of the cylinder of test gas (medical air or nitrogen).
- Fit the regulator onto the cylinder and read the pressure on the gauge.
- Connect the pipeline pressure gauge to the pipeline and bleed the pipeline to zero gauge pressure.
- Connect the cylinder to the pipeline and allow test gas to flow slowly into the pipeline up to pipeline distribution pressure. Turn off the cylinder valve. Allow the system to equilibrate for a few minutes.
- Read the pipeline pressure gauge and the cylinder pressure gauge.

**10.** The volume of the pipeline may be calculated as follows:

Pipeline volume =  $\frac{\text{cylinder volume} \times \text{change in cylinder pressure}}{\text{change in pipeline pressure}}$

$$P_1V_1 + P_2V_2 = P_3V_1 + P_4V_2$$

$$V_1(P_1 - P_3) = V_2(P_4 - P_2)$$

therefore

$$V_2 = \frac{V_1(P_1 - P_3)}{(P_4 - P_2)}$$

where

$V_1$  = cylinder volume

$V_2$  = pipeline volume

$P_1$  = initial cylinder gauge pressure

$P_3$  = final cylinder gauge pressure

$P_2$  = initial pipeline gauge pressure

$P_4$  = final pipeline gauge pressure

**11.** The volume (water content) of a G-size medical air cylinder may be taken as 23.3 litres. The volume (water content) of a J-size medical air cylinder may be taken as 46.6 litres.

**12.** To ensure maximum accuracy it is recommended that the system is vented and refilled 2–3 times and the average result taken.

# Appendix J

Pressure loss data

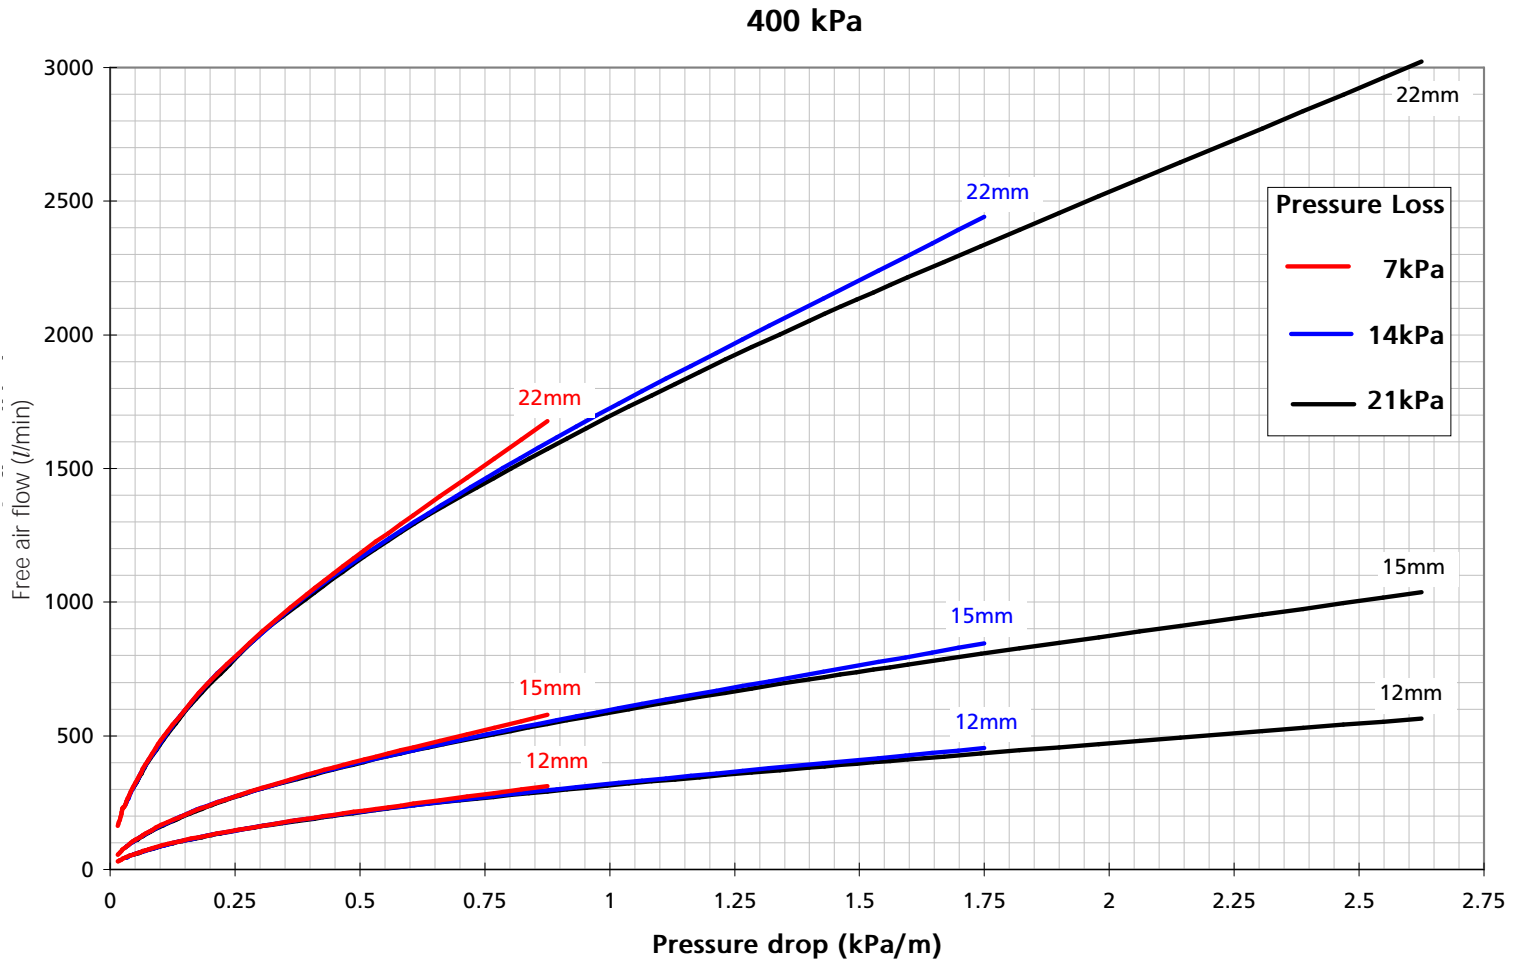

### 400 kPa

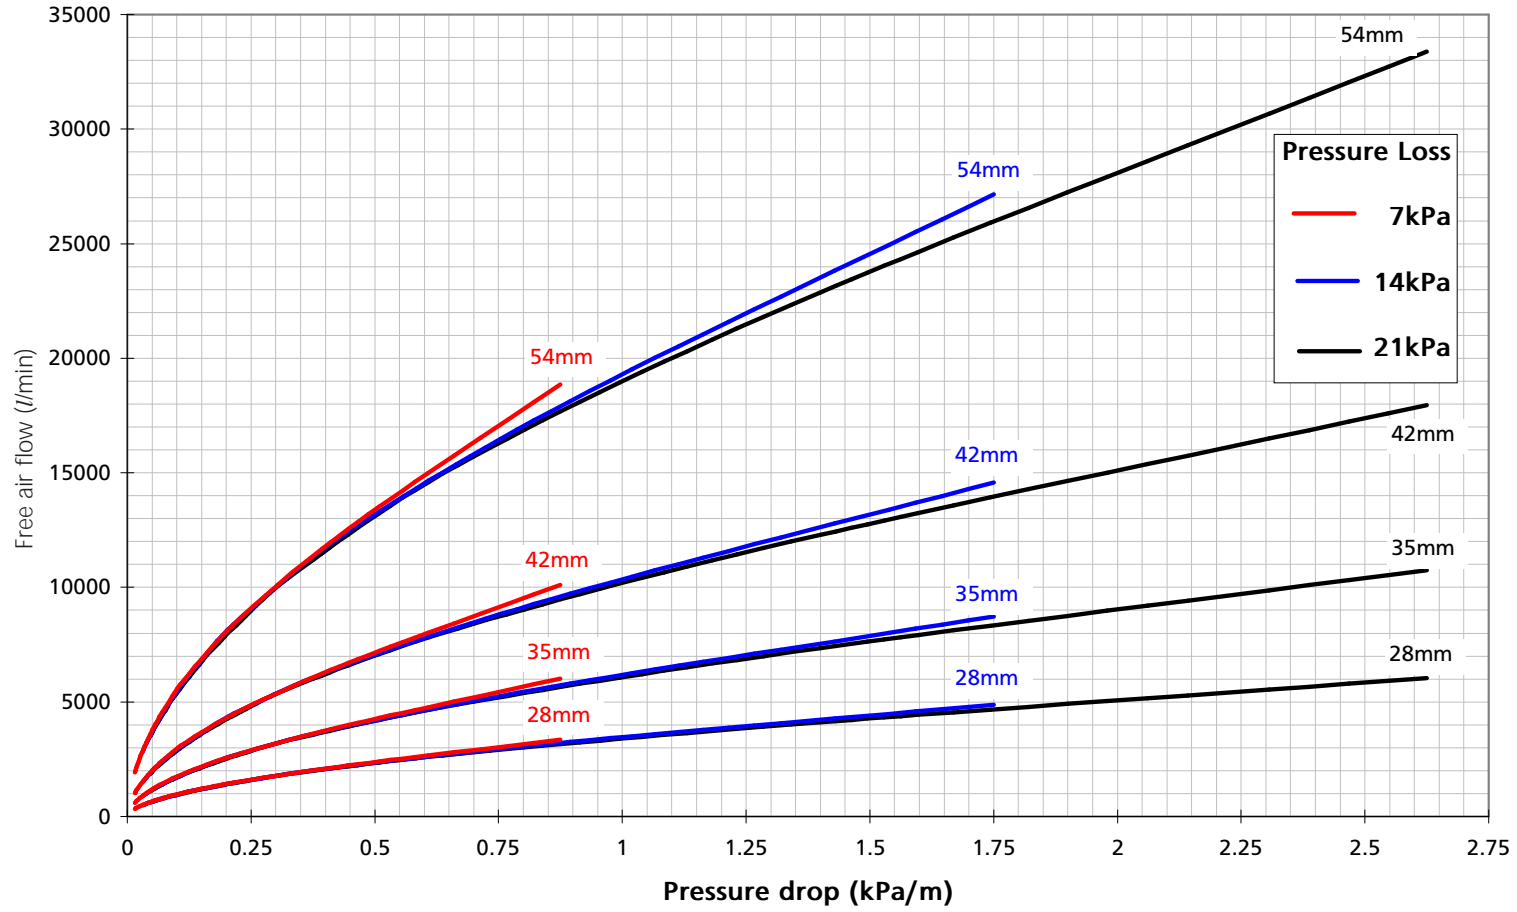

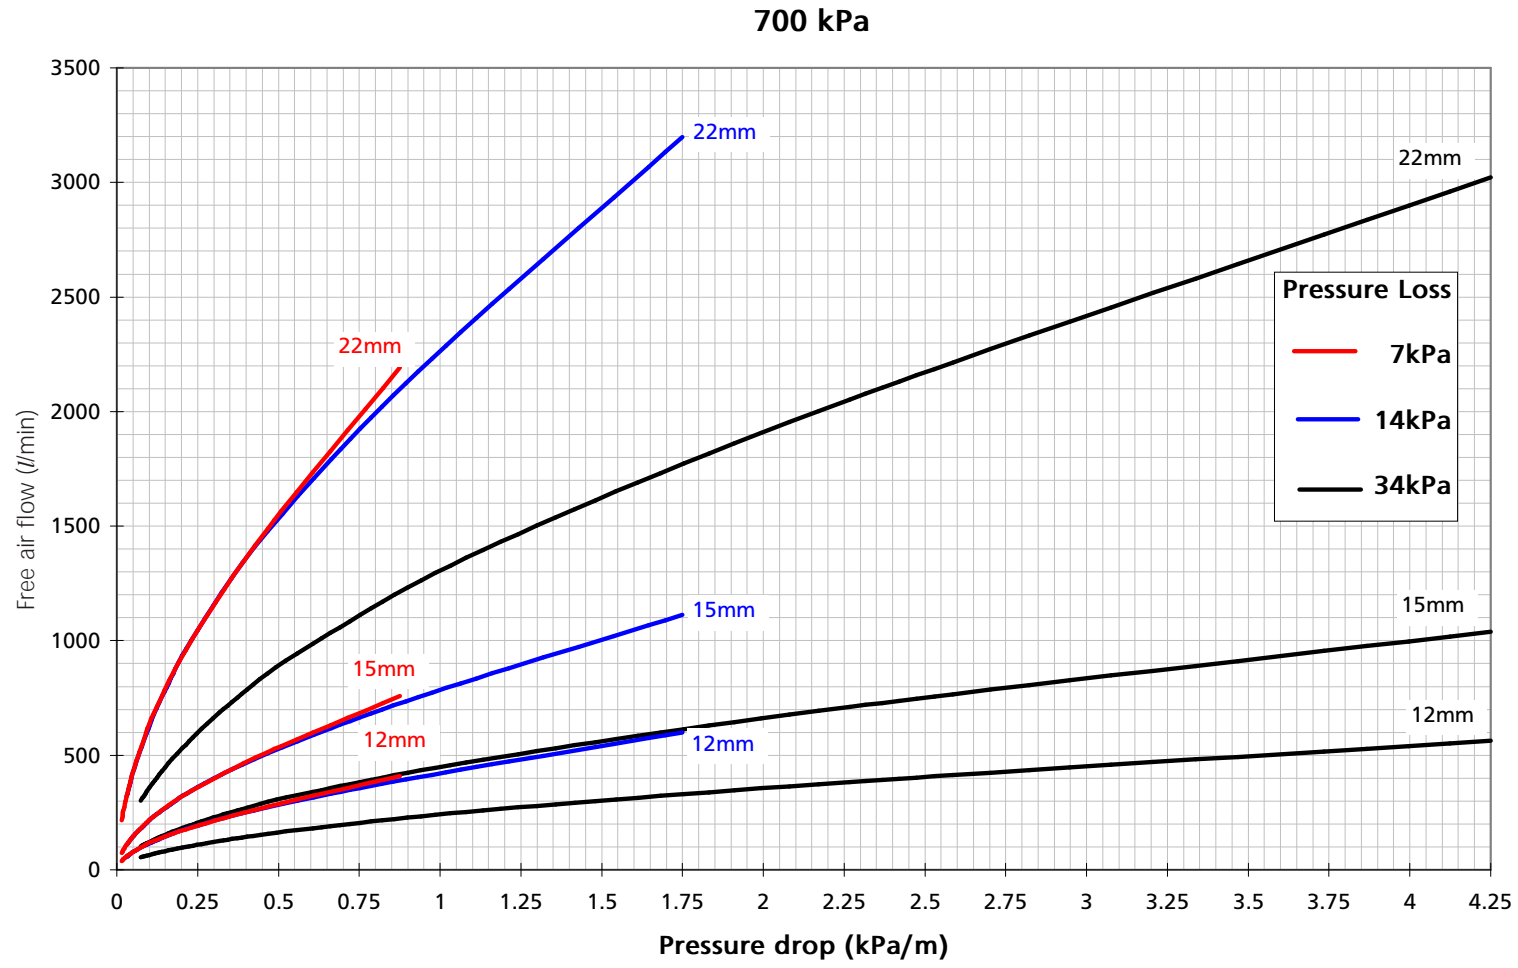



# 700 kPa

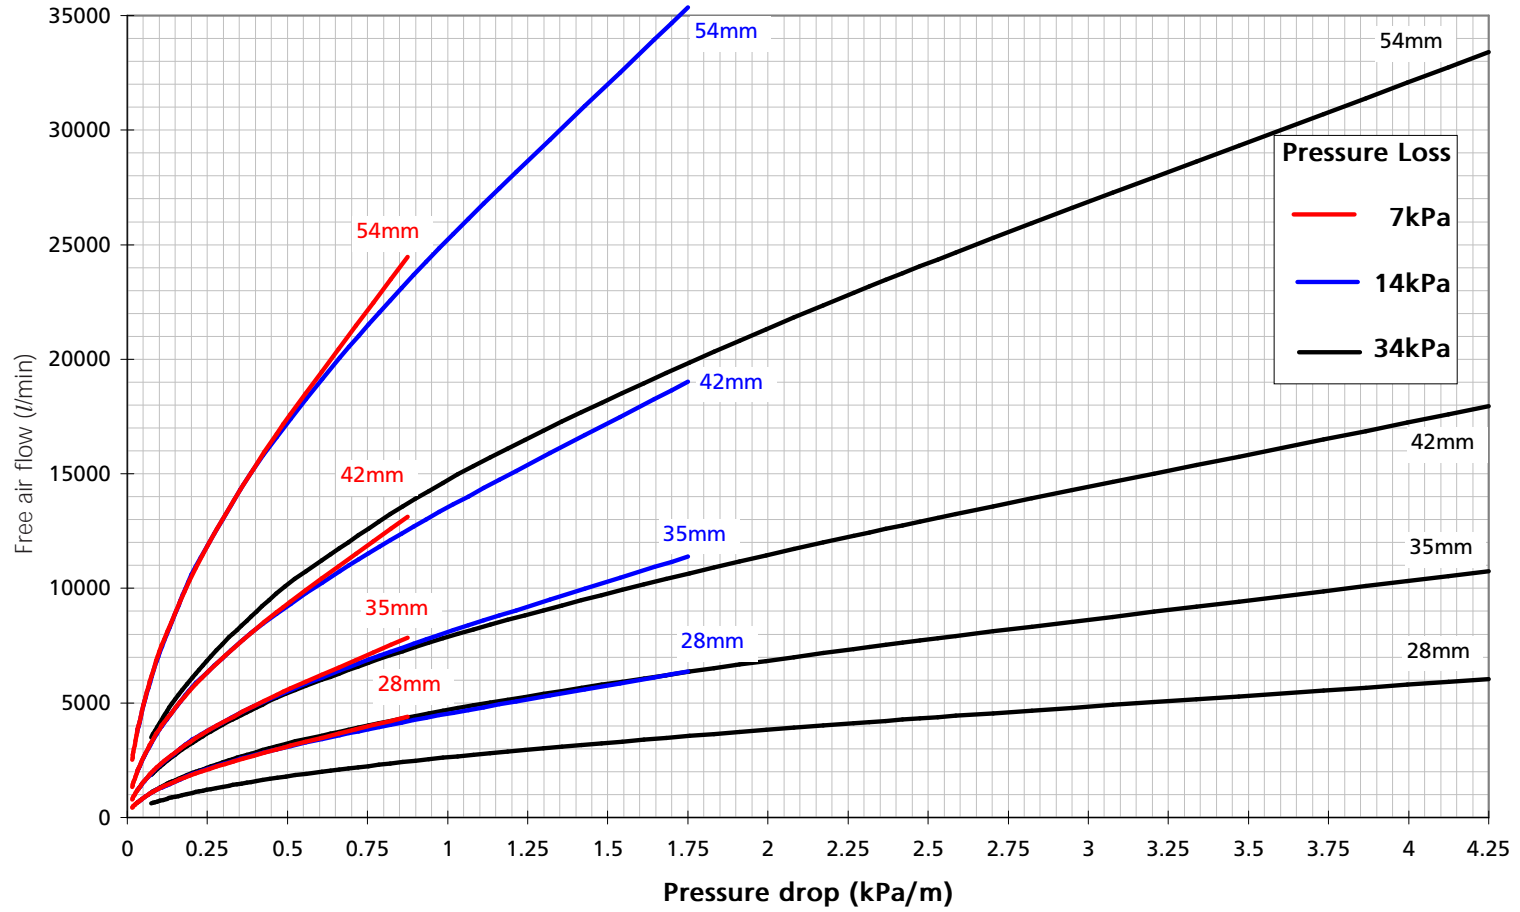

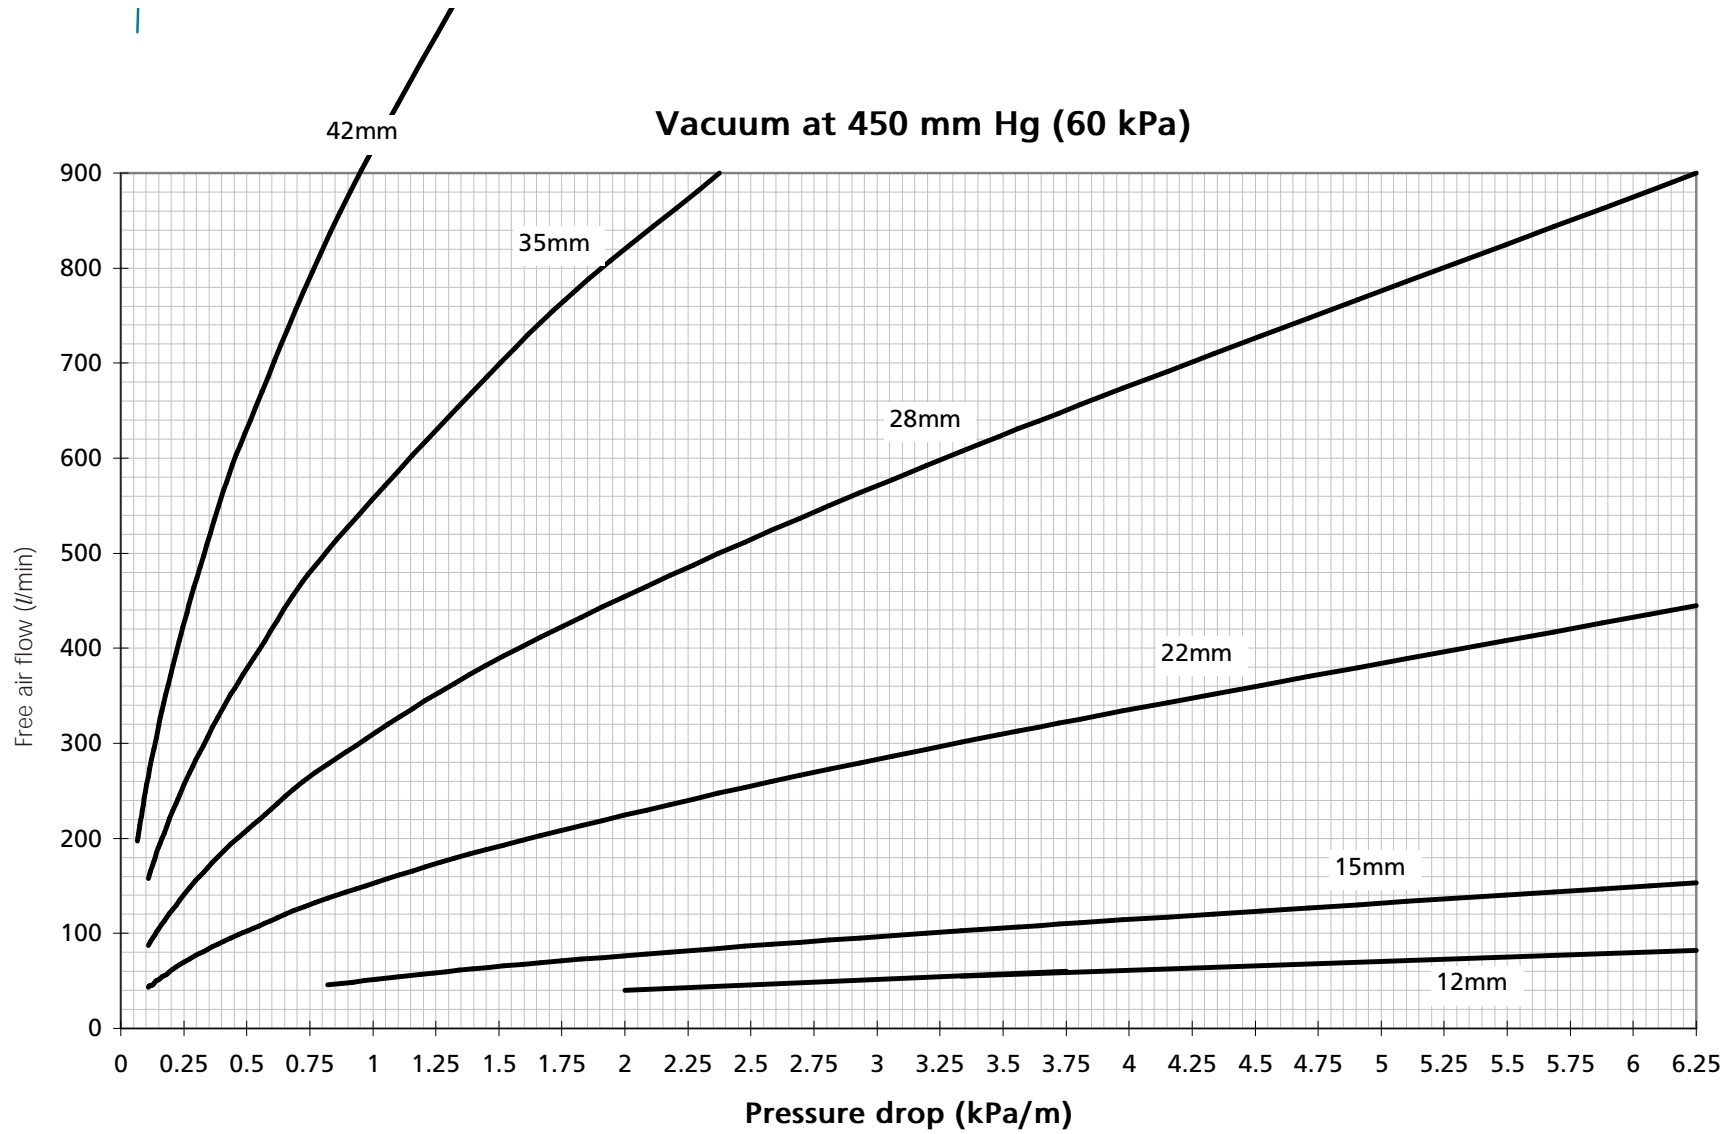

Note: all lines are applicable to pressure losses of 10 mm Hg, 20 mm Hg, 30 mm Hg and 50 mm Hg (1.3 kPa, 2.7 kPa, 4.0 kPa and 6.7 kPa)

### Vacuum at 450 mm Hg (60 kPa)

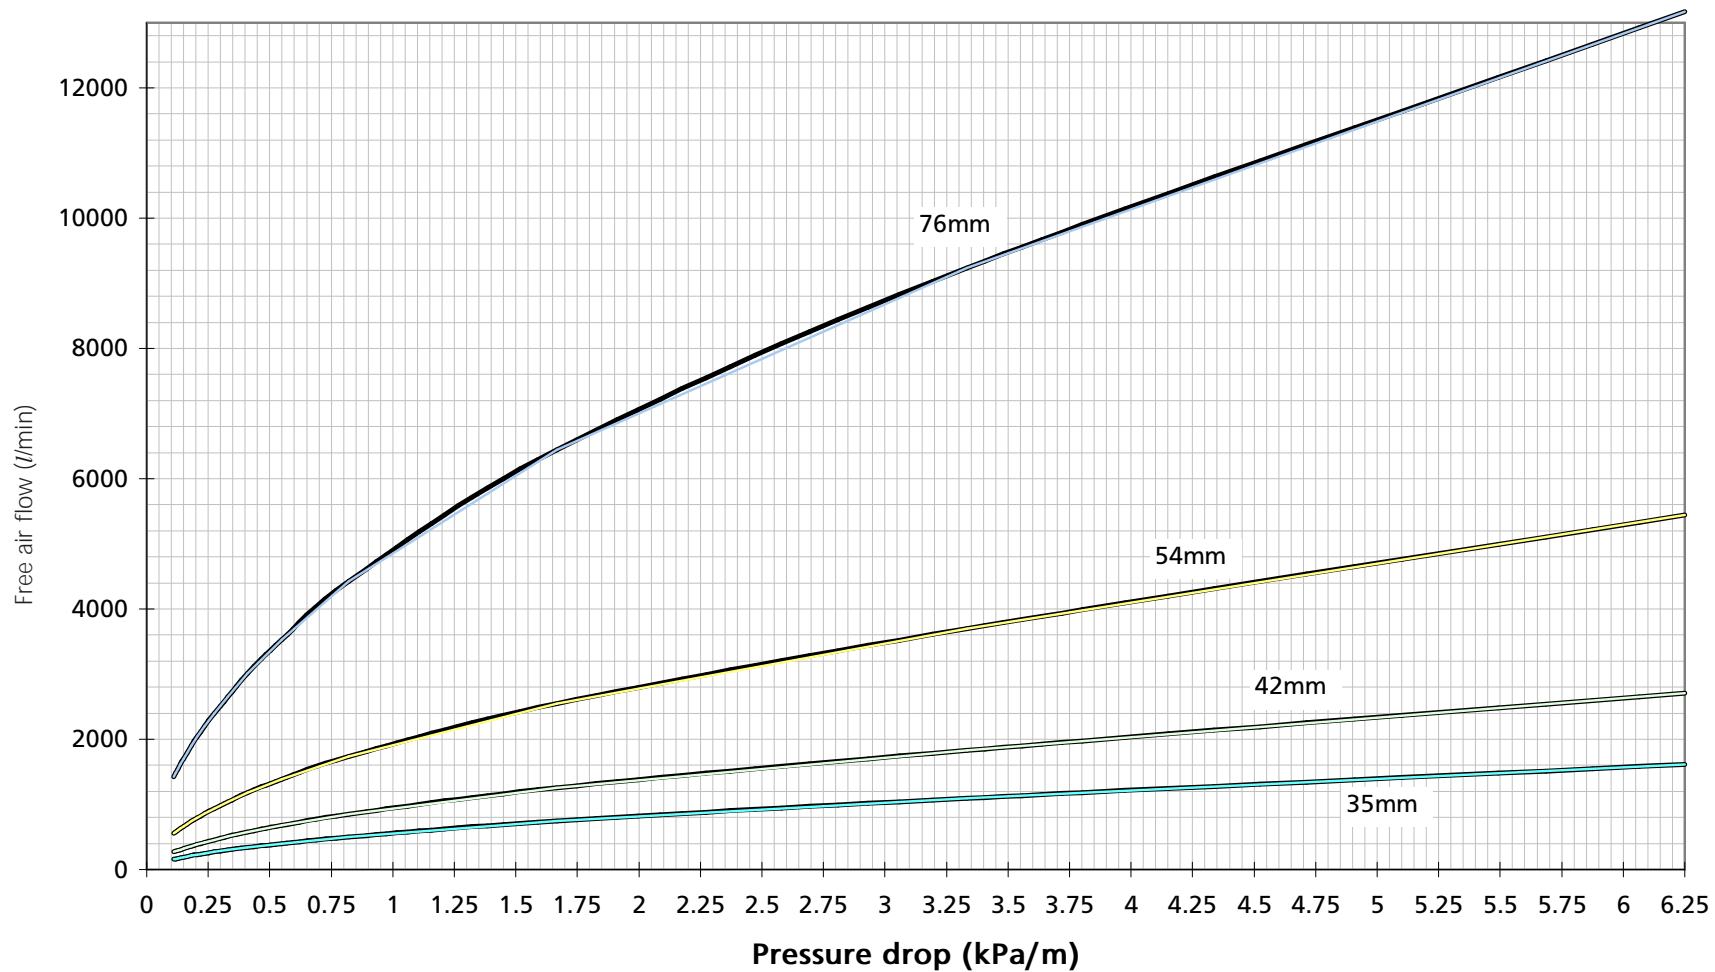

Note: all lines are applicable to pressure losses of 10 mm Hg, 20 mm Hg, 30 mm Hg and 50 mm Hg (1.3 kPa, 2.7 kPa, 4.0 kPa and 6.7 kPa)

# Appendix K

## Pressure regulations for 400 kPa (medical gases and medical air) and 700 kPa systems (surgical air)

### Pressure regulation for 400 kPa systems (medical gases and medical air)

1. The minimum pressure of 355 kPa which must be available at each terminal unit is the minimum required for medical equipment, specifically blenders. The pressure settings of the line regulators are based on achieving this minimum pressure, taking into account the operating tolerances of the components.
2. Typical pressure relationships are shown in Figure 21.
3. When designing the pipeline distribution system, the pressure loss allowance of 10% (including terminal units and hose assemblies) requires a minimum plant pressure of 420 kPa. The line pressure regulator has a control tolerance of  $\pm 4\%$ ; the maximum pressure likely to occur during static conditions is 460 kPa.
4. The pressure relationships are shown in Figure 21. Pressure regulations are intended as a guide to illustrate the relationship between the various set pressures. The actual pressure setting in practice could vary between 460 and 410 kPa depending on the design of the supply and distribution system. It is important, however, that at the point of use, the minimum pressure is achieved at the required flow.
5. Existing systems should be checked to ensure that any extension or modification is compatible with the existing systems.
6. Pressure regulators which require a continuous bleed to control pressure are not recommended because of the wastage of gas or air.
7. The pressure losses across a terminal unit and across a pendant (which includes a terminal unit) are shown in Table 1 (Pressure regulation). This is derived from BS 5682, amendment 5419:1987 and has been modified to include surgical air with flows at 350 l/min.

### Pressure regulation for surgical air 700 kPa systems

8. Compressed air for surgical tools should be available at the terminal unit at a pressure of 700 kPa at the required maximum flow of 350 l/min. To avoid over-pressurisation at lower flows, it will be necessary to provide a pressure control unit upstream of the terminal unit. The pressure loss of the hose connection between surgical tools and the terminal unit should be taken into account.
9. When designing the upstream pipeline distribution system, the pipeline pressure loss allowance of 15% requires a minimum plant/manifold pressure of approximately 1150 kPa. The line pressure regulator has a control range of  $\pm 5\%$ ; the maximum pressure likely to occur during static conditions is therefore approximately 1265 kPa.

**10.** These pressures are approximate; in practice the exact settings will depend on the design of the supply system and the distribution system. It is important to achieve the required flow at the minimum pressure at the point of use; the actual pressure settings which are used to achieve this will vary with each system design.

#### **Area alarm nominal setting**

**11.** The following statements apply to both 400 kPa and 700 kPa systems.

**12.** It should be noted that the alarm pressure switch setting and the safety valve settings overlap. It is not intended that the alarm system should provide a warning of safety valve relief. The over-pressure alarm is intended to provide users with advance warning of a potentially hazardous increase in line pressure which could adversely affect the operation of equipment such as blenders. Safety valves are intended to provide system protection in the event of regulator failure.

**13.** The over-pressure alarm setting should allow the alarm to switch off at a pressure just above the maximum static pressure in the system.

**14.** Safety valves to BS 6759 have a specified performance in which the minimum lift pressure is 97% of the set pressure whilst the full discharge pressure is 110% of the safety valve set pressure.

**15.** Air receiver set pressure is 110% of the nominal working pressure.

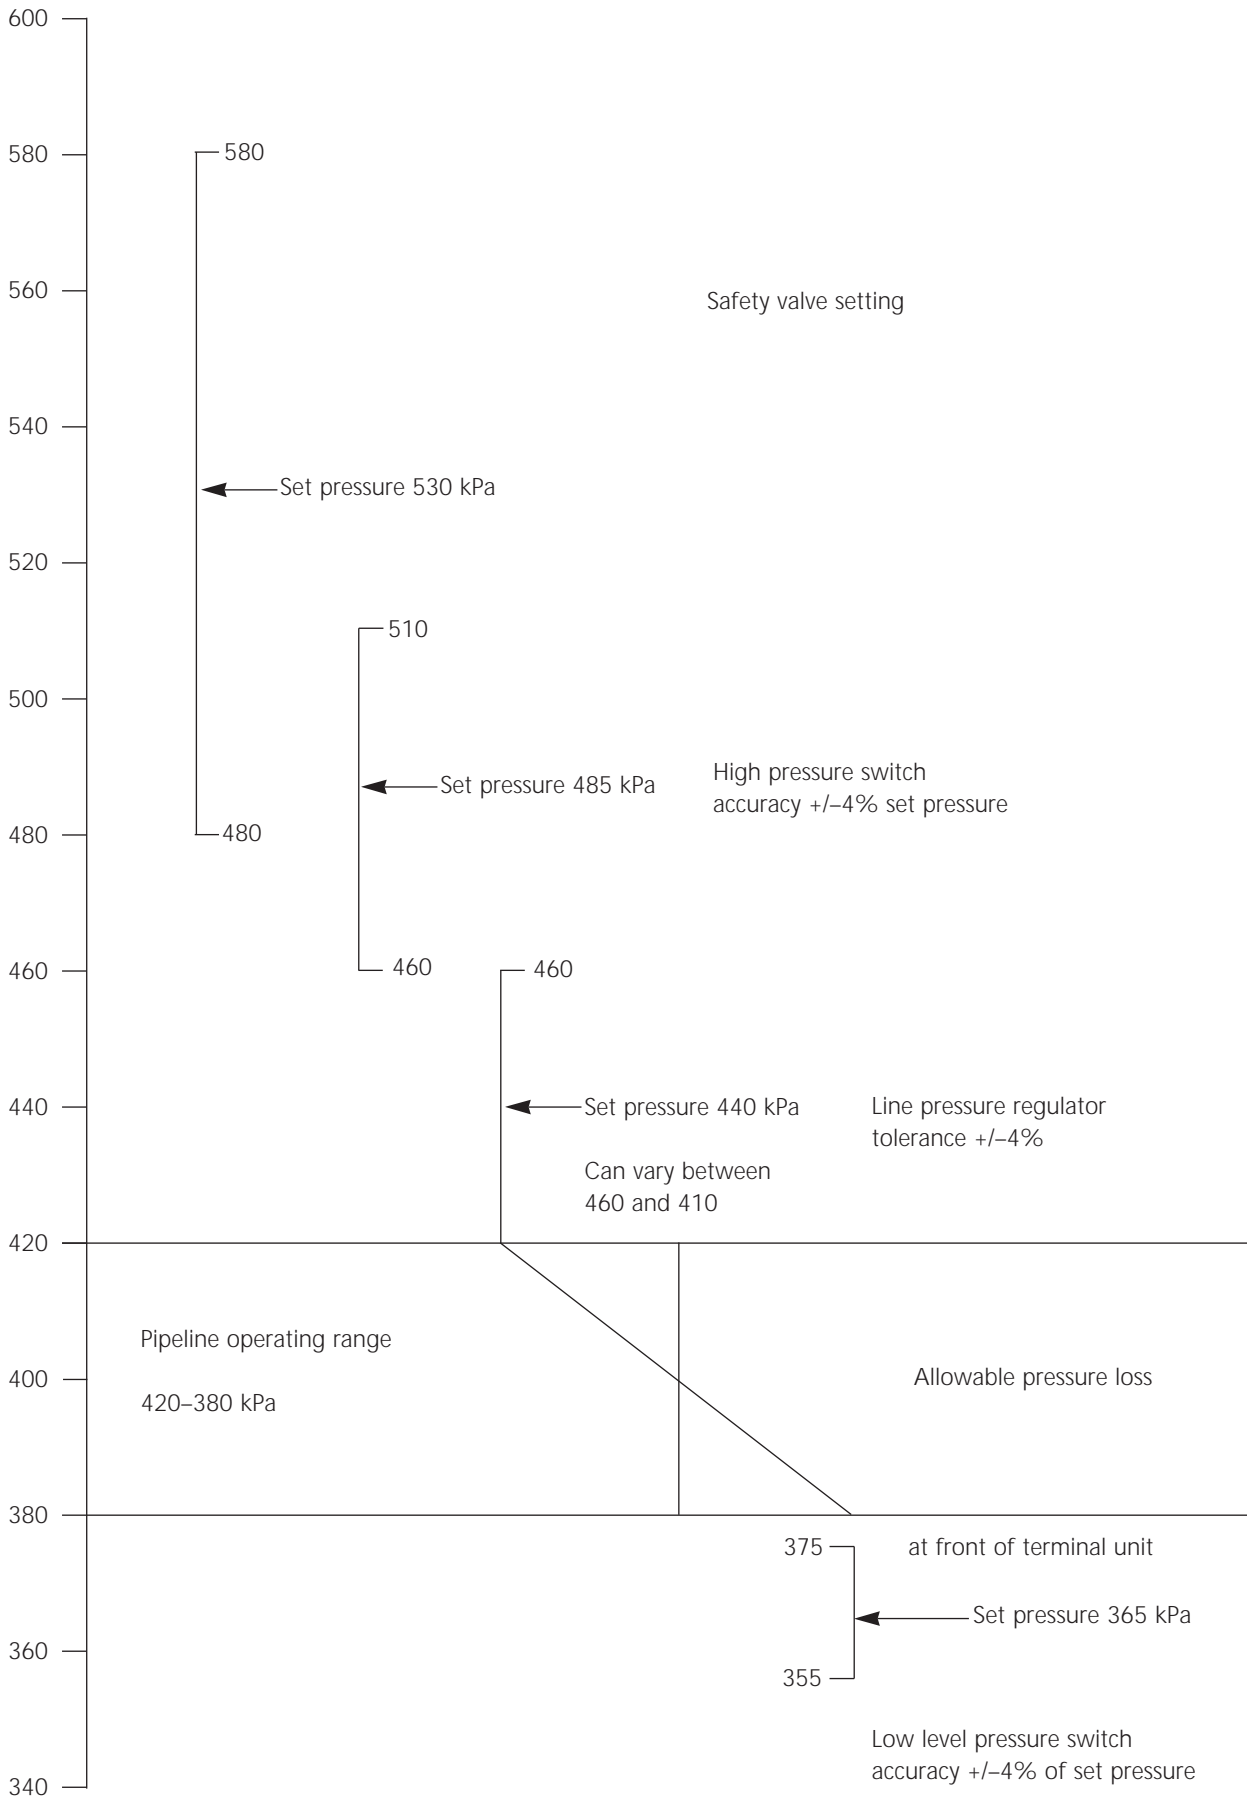

Figure 21 Pressure settings for 400 kPa systems

# References

## Acts and Regulations

**Public Health Act 1961.** The Stationery Office.

**Water Resources Act 1991.** The Stationery Office.

**Water Industry Act 1991.** The Stationery Office.

**SI 2169: 1989 Pressure systems and transportable gas regulations.** The Stationery Office, 1989.

**SI 3246: 1994 The control of substances hazardous to health (COSHH) regulations.** The Stationery Office, 1994.

**Medicines Act 1968.** The Stationery Office.

**Electromagnetic compatibility (89/336/EEC).** Official Journal of the European Communities L139 23.5.89. Amended by 91/263/EEC and 92/5031/EEC

## British Standards

**BS 7671 Requirements for electrical installations. IEE wiring regulations. 16th edition.**

**BS 88 Cartridge fuses for voltages up to and including 100V a.c. and 1500 V d.c.**

**BS 89 Direct acting indication analogue electrical measuring instruments and their accessories.**

**BS EN 132:1991 Respiratory protective devices – definitions.**

**BS 341 Transportable gas container valves.**

**BS 6017: 1981(1989) Specification for copper refinery shapes.**

**BS 1319: 1976(1986) Specification for medical gas cylinders, valves and yoke connections.**

**BS 1710: 1984(1991) Specification for identification of pipelines and services.**

**BS 1780: 1985(1992) Specification for bourdon tube pressure and vacuum gauges.**

**BS 1845: 1984 Specification for filler metals for brazing.**

**BS EN ISO 9000 Quality systems.**

**BS 2871 Specification for copper and copper alloys. Tubes.**

**BS EN 60898: 1991 Specification for circuit breakers for overcurrent protection for household and similar installations.**

**BS 4272 Anaesthetic and analgesic machines. Part 3 : 1989 Specification for continuous flow anaesthetic machines.**

**BS 4800:1989 (1994) Schedule of paint colours for building purposes.**

**BS EN 60947 Specification for low-voltage switchgear and controlgear.**

**BS EN 60947-2: 1996 Circuit-breakers.**

**BS 5169: 1992 Specification for fusion welded steel air receivers.**

**BS 5359: 1976(1983) Specification for magnetic eleven-disk packs for data processing. Mechanical and magnetic properties.**

**BS 5378 Safety signs and colours. Part 3 : 1982 (1995) Specification for additional signs to those given in BS 5378: Part 1.**

**BS 5682: 1984 (1992) Specification for terminal units, hose assemblies and their connectors for use with medical gas pipeline systems.**

**BS 5724 Medical electrical equipment. Part 1 General requirements for safety. Part 2 Particular requirements for safety. Section 2.12: 1990 Specification for lung ventilators. Section 2.13: 1990 Specification for anaesthetic machines.**

**BS 6387: 1994 Specification for performance requirements for cables required to maintain circuit integrity under fire conditions.**

**BS 6834: 1987 (1992) Specification for active anaesthetic gas scavenging systems.**

**BS 6759 Safety valves.**  
**Part 2: 1984 Specification for safety valves for compressed air or inert gases.**

**BS 7226: 1989 Methods of test for performance of inlet air cleaning equipment for internal combustion engines and compressors.**

**EN 1251 Cryogenic vessels – transportable vacuum insulated of not more than 1000 litres volume – operational requirements.**

## **NHS Estates publications**

**Model Engineering Specifications.** NHS Estates. 1993 (amended 1995)

### **Firecode**

*Health Technical Memoranda (HTMs)*

**81 Fire precautions in new hospitals.** NHS Estates. The Stationery Office, 1996.

**82 Alarm and detection systems.** NHS Estates. The Stationery Office, 1996.

### **Health Technical Memoranda (HTMs)**

**2007 Electrical services supply and distribution.** NHS Estates. The Stationery Office, 1993. (issued in 4 parts).

**2011 Emergency electrical services.** NHS Estates. The Stationery Office, 1993. (issued in 4 parts).

**2014 Abatement of electrical interference.** NHS Estates. The Stationery Office, 1993. (issued in 4 parts).

**2015 Bedhead services.** NHS Estates. The Stationery Office, 1994-95. (issued in 3 parts).

**2025 Ventilation in healthcare premises.** NHS Estates. The Stationery Office, 1994. (issued in 4 parts).

## **Miscellaneous publications**

**Occupations exposure standards for anaesthetic agents (EL(96)33).** Department of Health, 1996.

**Advice on the implementation of the Health and Safety Commissions occupational exposure**

**standards for anaesthetic agents.** Department of Health, 1996.

**Anaesthetic agents: controlling exposure under COSHH.** Health Service Advisory Committee.

**Code of practice 19 Bulk liquid oxygen storage at users premises (Revision 2).** British Compressed Gases Association, 1996.

**Medical gas pipe systems. Design and installation of (QAS 3720.1/206).** BSI/Department of Health, 1988.

**Guidance notes for users of liquid cylinders of low pressure cryogenic liquid supply vessels for liquid oxygen, nitrogen or argon with capacity of under 450 litres (G4521).** BOC Gas, 1996.



## Other publications in this series

(Given below are details of all Health Technical Memoranda available from The Stationery Office. HTMs marked (\*) are currently being revised, those marked (†) are out of print. Some HTMs in preparation at the time of publication of this HTM are also listed.)

- 1 Anti-static precautions: rubber, plastics and fabrics†
- 2 Anti-static precautions: flooring in anaesthetising areas (and data processing rooms), 1977.
- 3–4 –
- 2005 Building management systems, 1996.
- 2007 Electrical services: supply and distribution, 1993.
- 2009 Pneumatic air tube transport systems, 1995.
- 2010 Sterilization, 1994, 1995, 1997.
- 2011 Emergency electrical services, 1993.
- 2014 Abatement of electrical interference, 1993.
- 2015 Bedhead services, 1994, 1995.
- 2017 Health building engineering installations: commissioning and associated activities.\*
- 2020 Electrical safety code for low voltage systems, 1993.
- 2021 Electrical safety code for high voltage systems, 1993, 1994.
- 2023 Access and accommodation for engineering services, 1995.
- 2024 Lifts, 1995.
- 2025 Ventilation in healthcare premises, 1994.
- 2027 Hot and cold water supply, storage and mains services, 1995.
- 2030 Washer-disinfectors, 1995.
- 2031 Clean steam for sterilization, 1997.
- 2035 Mains signalling, 1996.
- 2040 The control of legionellae in healthcare premises – a code of practice, 1994.
- 2045 Acoustics, 1996.
- 2050 Risk management in the NHS estate, 1994.
- 2055 Telecommunications (telephone exchanges), 1994.
- 2060 Supply and treatment of water.\*
- 2065 Waste guidance.\*
- 2070 Estates emergency and contingency planning, 1997.
- 2075 Clinical waste disposal: alternative technologies.\*

### Component Data Base (HTMs 54 to 80)

- 54.1 User manual, 1993.
- 55 Windows, 1989.\*
- 56 Partitions, 1989.\*
- 57 Internal glazing, 1995.
- 58 Internal doorsets, 1989.\*
- 59 Ironmongery.\*
- 60 Ceilings, 1989.
- 61 Flooring, 1995.
- 62 Demountable storage systems, 1989.
- 63 Fitted storage systems, 1989.
- 64 Sanitary assemblies, 1995.
- 65 Health signs\*
- 66 Cubicle curtain track, 1989.
- 67 Laboratory fitting-out system, 1993.
- 68 Ducts and panel assemblies, 1993.
- 69 Protection, 1993.
- 70 Fixings, 1993.
- 71 Materials management modular system, 1993.\*
- 72 to 80 –

### Firecode

- 81 Firecode: fire precautions in new hospitals, 1996.
- 82 Firecode: alarm and detection systems, 1996.
- 83 Fire safety in healthcare premises: general fire precautions, 1994.
- 84 Firecode: fire safety in residential care premises (**applicable in Northern Ireland only**), 1995.
- 85 Firecode: fire precautions in existing hospitals, 1994.
- 86 Firecode: fire risk assessment in hospitals, 1994.
- 87 Firecode: textiles and furniture, 1993.
- 88 Fire safety in healthcare premises: guide to fire precautions in NHS housing in the community for mentally handicapped/ill people, 1986.

Health Technical Memoranda published by The Stationery Office can be purchased from SO bookshops in London (post orders to PO Box 276, SW8 5DT), Edinburgh, Belfast, Cardiff, Manchester, Birmingham and Bristol, or through good booksellers. SO provide a copy service for publications which are out of print; and a standing order service.

Enquiries about Health Technical Memoranda should be addressed to: NHS Estates, Department of Health, Publications Unit, 1 Trevelyan Square, Boar Lane, Leeds LS1 6AE.

# About NHS Estates

NHS Estates is an Executive Agency of the Department of Health and is involved with all aspects of health estate management, development and maintenance. The Agency has a dynamic fund of knowledge which it has acquired during over 30 years of working in the field. Using this knowledge NHS Estates has developed products which are unique in range and depth. These are described below. NHS Estates also makes its experience available to the field through its consultancy services.

Enquiries about NHS Estates should be addressed to:  
NHS Estates, Publications Unit, Department of Health,  
1 Trevelyan Square, Boar Lane, Leeds LS1 6AE.  
Telephone 0113 254 7000.  
<http://www.demon.co.uk/nhsestates/hpage.html/>

## Some NHS Estates products

**Activity DataBase** – a computerised briefing and design system for use in health buildings, applicable to both new build and refurbishment schemes. *NHS Estates*

**Design Guides** – complementary to Health Building Notes, Design Guides provide advice for planners and designers about subjects not appropriate to the Health Building Notes series. *SO*

**Estatecode** – user manual for managing a health estate. Includes a recommended methodology for property appraisal and provides a basis for integration of the estate into corporate business planning. *SO*

**Concode** – outlines proven methods of selecting contracts and commissioning consultants. Reflects official policy on contract procedures. *SO*

**Works Information Management System** – a computerised information system for estate management tasks, enabling tangible assets to be put into the context of servicing requirements. *NHS Estates*

**Health Building Notes** – advice for project teams procuring new buildings and adapting or extending existing buildings. *SO*

**Health Guidance Notes** – an occasional series of publications which respond to changes in Department of Health policy or reflect changing NHS operational management. Each deals with a specific topic and is complementary to a related HTM. *SO*

**Health Technical Memoranda** – guidance on the design, installation and running of specialised building service systems, and on specialised building components. *SO*

**Health Facilities Notes** – debate current and topical issues of concern across all areas of healthcare provision. *SO*

**Encode** – shows how to plan and implement a policy of energy efficiency in a building. *SO*

**Firecode** – for policy, technical guidance and specialist aspects of fire precautions. *SO*

**Capital Investment Manual Database** – software support for managing the capital programme. Compatible with Capital Investment Manual. *NHS Estates*

**Model Engineering Specifications** – comprehensive advice used in briefing consultants, contractors and suppliers of healthcare engineering services to meet Departmental policy and best practice guidance. *NHS Estates*

**Quarterly Briefing** – gives a regular overview on the construction industry and an outlook on how this may affect building projects in the health sector, in particular the impact on business prices. Also provides information on new and revised cost allowances for health buildings. Published four times a year; available on subscription direct from NHS Estates. *NHS Estates*

Items noted "SO" can be purchased from The Stationery Office Bookshops in London (post orders to PO Box 276, SW8 5DT), Edinburgh, Belfast, Manchester, Birmingham and Bristol or through good booksellers.

## NHS Estates consultancy service

Designed to meet a range of needs from advice on the oversight of estates management functions to a much fuller collaboration for particularly innovative or exemplary projects.

Enquiries should be addressed to: NHS Estates Consultancy Service (address as above).
